# Supplementary material for: Characterization and usage of the EASY-spray technology as part of an online 2D SCX-RP ultra-high pressure system
Source: Royal Society of Chemistry journal article supplement (doi:10.1039/c4an01568a), 2014-01-01
Supplement: c4an01568a2.xlsx [file c4an01568a2.xlsx]

## Sheet: 1D 3 times 180 min Peptides
Mascot Score ≥ 20	Search Engine Rank=1
Peptide Rank = 1	Confidence= High
Sequence	Protein Group Accessions	Modifications	Isoform Confidence Probability	phosphoRS Site Probabilities	Area	q-Value	PEP	IonScore	Exp Value	Charge	m/z [Da]
GGGGGGGGGGGLGGGLGNVLGGLISGAGGGGGGGGGGGGGGGGGGGGTAMR	UniProtKB:P04632				130107804	0	8.47696e-23	184.43	2.15085e-16	3	1194.57
NmGGPYGGGNYGPGGSGGSGGYGGR	UniProtKB:P22626	M2(Oxidation)			619432018	0	1.26111e-10	182.47	2.48013e-16	2	1103.46
sHVAVENALGLDQQFAGLDLNSSDNQSGGSTASK	UniProtKB:O00571	N-Term(Acetyl)			73530072	0	2.69021e-14	181.64	4.27813e-16	3	1153.88
aETLSGLGDSGAAGAAALSSASSETGTR	UniProtKB:Q15424	N-Term(Acetyl)			169939948	0	1.26218e-15	179.32	6.18899e-16	2	1269.11
APLATGEDDDDEVPDLVENFDEASK	UniProtKB:P20290				9.01936e+08	0	1.40165e-16	179.27	7.20531e-16	2	1346.1
QTTVSNSQQAYQEAFEISK	UniProtKB:P31946				160130294	0	6.21827e-09	178.97	6.46439e-16	2	1080.02
TSTSNVEQYQAMVTSLEESLNK	UniProtKB:P12270				2.6951e+08	0	2.81481e-09	177.72	8.92722e-16	2	1230.09
MTDSFTEQADQVTAEVGK	UniProtKB:P09417				38111088	0	4.18068e-10	177.63	8.58087e-16	2	978.945
DGVADVSIEDSVISLSGDHcIIGR	UniProtKB:P00441	C20(Carbamidomethyl)			4405966714	0	3.1717e-13	175.47	1.47359e-15	2	1257.61
LQEALDAEMLEDEAGGGGAGPGGAcK	UniProtKB:Q1KMD3	C25(Carbamidomethyl)			128719483	0	3.37918e-13	174.76	1.97242e-15	2	1252.06
LVQDVANNTNEEAGDGTTTATVLAR	UniProtKB:P10809				3.2153e+09	0	3.43286e-13	174.56	1.74465e-15	2	1280.63
NLSPVVSNELLEQAFSQFGPVEK	UniProtKB:Q8WXF1				346342705	0	2.79053e-10	170.55	2.50702e-15	2	1266.67
NMGGPYGGGNYGPGGSGGSGGYGGR	UniProtKB:P22626				4.0375e+09	0	4.17084e-13	169.67	5.01225e-15	2	1095.46
DAASLESQLQDTQELLQEETR	UniProtKB:P35580				6.76599e+08	0	1.42347e-10	165.94	1.37936e-14	2	1202.57
QTQIFTTYSDNQPGVLIQVYEGER	UniProtKB:P34931;UniProtKB:P08107				2158329113	0	4.44564e-09	165.14	1.35875e-14	2	1393.7
IMQSSSEVGYDAMAGDFVNMVEK	UniProtKB:P10809				1.09835e+09	0	2.14568e-12	164.37	2.18516e-14	2	1254.56
WSTDDVQINDISLQDYIAVK	UniProtKB:P46782				908896994	0	3.14806e-10	160.68	3.66311e-14	2	1162.08
QAFTDVATGSLGQGLGAAcGMAYTGK	UniProtKB:P29401	C19(Carbamidomethyl)			856607162	0	7.69316e-14	159.09	6.9504e-14	2	1266.6
YGINTTDIFQTVDLWEGK	UniProtKB:P37802				4160079579	0	1.70486e-09	158.66	6.0666e-14	2	1050.52
NPGVGNGDDEAAELMQQVNVLK	UniProtKB:Q15691				488981676	0	9.56455e-13	157.87	8.28774e-14	2	1149.56
VIESTQDLGNDLAGVMALQR	UniProtKB:Q01082				4.98388e+07	0	1.60119e-10	157.66	6.34164e-14	2	1065.54
GGGGGGYGSGGSSYGSGGGSYGSGGGGGGGR	UniProtKB:CON_P04264;UniProtKB:P04264				5.65031e+07	0	1.59754e-12	157.32	8.11105e-14	2	1192.48
EmEENFAVEAANYQDTIGR	UniProtKB:P08670	M2(Oxidation)			211235367	0	7.02745e-10	156.76	1.0967e-13	2	1101.98
LGFSEVELVQMVVDGVK	UniProtKB:P12277				9.17969e+08	0	3.39468e-08	156.45	4.93806e-14	2	925.002
LFLNETQTQEITEDIPVK	UniProtKB:P41252				4.25473e+08	0	2.04447e-09	156.31	6.12541e-14	2	1059.56
GLQVDLQSDGAAAEDIVASEQSLGQK	UniProtKB:P33991				0	0	1.18996e-13	156.28	1.03575e-13	2	1315.16
TMMAcGGSIQTSVNALSADVLGR	UniProtKB:Q99832	C5(Carbamidomethyl)			4.87213e+08	0	4.30001e-12	155.9	1.30833e-13	2	1170.06
VAGTGEGGLEEMVEELNSGK	UniProtKB:Q9UJU6				307164410	0	4.78625e-11	155.72	1.28935e-13	2	1003.48
DLGLSESGEDVNAAILDESGK	UniProtKB:P13667				3.75273e+08	0	2.18653e-10	155.08	1.54359e-13	2	1060
LNEDMAcSVAGITSDANVLTNELR	UniProtKB:P25789	C7(Carbamidomethyl)			1219447297	0	7.77865e-11	155.03	1.72351e-13	2	1297.12
DLYANTVLSGGTTMYPGIADR	UniProtKB:CON_P60712;UniProtKB:P63261				17423924920	0	3.49214e-10	154.17	1.85345e-13	2	1108.04
GINSSNVENQLQATQAAR	UniProtKB:P52292				3.42736e+08	0	6.61876e-08	154.05	1.53839e-13	2	950.981
GFGDGYNGYGGGPGGGNFGGSPGYGGGR	UniProtKB:P22626				1183257559	0	8.8988e-13	153.54	2.34815e-13	2	1248.03
IYDDDFFQNLDGVANALDNVDAR	UniProtKB:P22314				1.89937e+09	0	2.43685e-06	153.52	2.42591e-13	2	1300.62
APNTPASGANGDGSMSQTQSGSTVK	UniProtKB:CON_P15636				3899217862	0	1.35558e-11	153.22	2.72971e-13	2	1175.54
ATLVESSTSGFTPGGGGSSVSMIASR	UniProtKB:P49321				323901474	0	1.03862e-09	153.11	2.29056e-13	2	1222.1
FTASAGIQVVGDDLTVTNPK	UniProtKB:P06733				633291316	0	2.8042e-10	153	1.48752e-13	2	1017.03
aASAAAASAAAASAASGSPGPGEGSAGGEK	UniProtKB:Q13263	N-Term(Acetyl)			1209792194	0	3.04587e-14	152.66	3.12626e-13	2	1215.06
SVGDNSSDLSNVAVIDGNR	UniProtKB:O95163				5.35586e+07	0	5.12718e-07	152.58	2.5655e-13	2	959.958
GTITIQDTGIGMTQEELVSNLGTIAR	UniProtKB:Q12931				70118518	0	3.10901e-12	152.51	1.65313e-13	2	1359.71
VQDDEVGDGTTSVTVLAAELLR	UniProtKB:P78371				3186405515	0	7.14218e-12	152.29	1.71306e-13	2	1144.6
VATAQDDITGDGTTSNVLIIGELLK	UniProtKB:P40227				805194529	0	3.39283e-12	152.06	1.44436e-13	2	1272.68
ISYTDAEGNLGLLENVcDPSGK	UniProtKB:O75717	C17(Carbamidomethyl)			67531164	0	5.62062e-09	151.92	3.33073e-13	2	1176.57
YESVIATLcENLDSLDEPEAR	UniProtKB:Q10567	C9(Carbamidomethyl)			51279232	0	2.33397e-07	151.65	3.88667e-13	2	1212.57
DAEDAmDAMDGAVLDGR	UniProtKB:Q01130	M6(Oxidation)			3.5814e+07	0	6.81948e-07	151.25	2.37791e-13	2	884.357
PSSLLGAAMPASTSAAALQEALENAGR	UniProtKB:O75694				331415120	0	3.11028e-12	150.87	2.8769e-13	2	1292.66
GTELDDGIQADSGPINDTDANPR	UniProtKB:P55210				1.28427e+07	0	7.84472e-07	150.75	4.82498e-13	2	1186.04
GWTGQESLSDSDPEMWELLQR	UniProtKB:P34897				149529174	0	2.70599e-07	150.6	5.1156e-13	2	1232.57
SVGDGETVEFDVVEGEK	UniProtKB:P67809;UniProtKB:P16989;UniProtKB:Q9Y2T7				1.54557e+09	0	2.40877e-06	150.54	4.0211e-13	2	898.415
ScTVLNVEGDALGAGLLQNYVDR	UniProtKB:Q15758	C2(Carbamidomethyl)			0	0	8.96595e-11	150.34	4.60222e-13	2	1232.6
LQELEScSGLGSTSDDTDVR	UniProtKB:Q14C86	C7(Carbamidomethyl)			7.25723e+07	0	6.76014e-11	150	5.1335e-13	2	1084.98
NVMSAFGLTDDQVSGPPSAPAEDR	UniProtKB:Q92734				2.00267e+08	0	1.16709e-13	149.89	5.95801e-13	2	1231.07
FNQAQSGNIQSTVMLDK	UniProtKB:P42224				32982496	0	1.4431e-06	149.86	4.38924e-13	2	940.964
IAQLEEELEEEQSNMELLNDR	UniProtKB:P35580				472226708	0	1.96554e-10	149.32	6.41704e-13	2	1266.6
QTQTFTTYSDNQPGVLIQVYEGER	UniProtKB:P11142				3212447830	0	6.69321e-12	148.76	6.92169e-13	2	1387.67
TELEDTLDSTAAQQELR	UniProtKB:P35579				232195622	0	4.87434e-08	147.67	7.65232e-13	2	960.467
SLQADTTNTDTALTTLEEALAEK	UniProtKB:Q8IUD2				0	0	6.2362e-12	147.49	7.39063e-13	2	1218.61
IMVVGSTINDVLAVNTPK	UniProtKB:O14562				3.6409e+07	0	4.38168e-08	147.17	2.78015e-13	2	936.025
LSSSQGTIETSLQDIDSR	UniProtKB:Q9UHD2				3.63399e+07	0	1.99642e-06	147.02	8.45679e-13	2	968.979
VLGENYTLEDEEDSQIcTVGR	UniProtKB:Q15029	C17(Carbamidomethyl)			74225265	0	4.36121e-10	146.83	1.17959e-12	2	1214.06
SSSNSGSTGFISFSGVESALSSLK	UniProtKB:Q96MF7				1.03148e+07	0	4.45401e-06	146.55	1.10345e-12	2	1168.57
QLSAQGQMTQLcELINK	UniProtKB:Q9UNS2	C12(Carbamidomethyl)			203298756	0	8.07516e-09	146.46	9.27046e-13	2	981.492
LIEAEDNMNcQMSNITVTYR	UniProtKB:P62318	C10(Carbamidomethyl)			228736414	0	1.79187e-10	146.35	1.35139e-12	2	1201.55
FQDTAEALAAFTALMEGK	UniProtKB:Q9Y2X3				9.32034e+07	0	1.4224e-08	146.17	9.80677e-13	2	957.479
WGDAGAEYVVESTGVFTTMEK	UniProtKB:P04406;UniProtKB:CON_P10096				1.06245e+09	0	4.90121e-12	145.87	1.43633e-12	2	1139.03
VGEAGLLSVDcSEAGPGALGLEAVSDSGTK	UniProtKB:O75369	C11(Carbamidomethyl)			115174284	0	7.90243e-15	145.5	1.35156e-12	2	1423.7
ITSEAEDLVANFFPK	UniProtKB:P61289				546387863	0	6.25839e-07	144.73	1.21447e-12	2	840.928
AQDIEAGDGTTSVVIIAGSLLDScTK	UniProtKB:P50991	C24(Carbamidomethyl)			1.51931e+08	0	6.64046e-07	144.72	1.56029e-12	2	1311.15
SEDSTKDDIDLDALAAEIEGAGAAK	UniProtKB:O60841				7.73713e+08	0	8.77306e-11	144.65	1.82404e-12	2	1253.1
VLSLETSVNELNSQLNESK	UniProtKB:Q15075				95264868	0	1.84976e-09	144.07	1.39734e-12	2	1052.54
YESIIATLcENLDSLDEPDAR	UniProtKB:P63010	C9(Carbamidomethyl)			6.04806e+06	0	3.7116e-07	143.66	2.11109e-12	2	1212.59
STNcFGDNDPIDVcEIGSK	UniProtKB:Q9H2U2	C4(Carbamidomethyl); C14(Carbamidomethyl)			9.5385e+07	0	2.77809e-06	143.2	2.13349e-12	2	1064.45
VAAAPDEDLDGDDEDDAEDENNIDNR	UniProtKB:Q9BXV9				5.33608e+06	0	2.69726e-07	142.86	2.65506e-12	2	1416.58
AQTEGINISEEALNHLGEIGTK	UniProtKB:Q9Y265				2646213152	0	1.63669e-11	142.81	1.87606e-12	2	1162.6
SEQDQAENEGEDSAVLMER	UniProtKB:Q99613				2.60008e+08	0	1.84202e-09	142.58	2.6715e-12	2	1068.96
NADMSEDMQQDAVDcATQAMEK	UniProtKB:Q96FJ2	C15(Carbamidomethyl)			147929291	0	1.28044e-10	142.39	2.42415e-12	2	1244.49
IcALDDNVcMAFAGLTADAR	UniProtKB:O14818	C2(Carbamidomethyl); C9(Carbamidomethyl)			374683664	0	5.5563e-10	142.37	3.10371e-12	2	1092.5
VcLLGcGISTGYGAAVNTAK	UniProtKB:P11766	C2(Carbamidomethyl); C6(Carbamidomethyl)			258424016	0	4.37755e-09	142.31	2.34966e-12	2	1006.5
LLQDSVDFSLADAINTEFK	UniProtKB:P08670				9.00253e+08	0	1.40004e-09	142.16	2.36595e-12	2	1063.54
NSNQLGGNTESSESSETcSSK	UniProtKB:Q9H9A5	C18(Carbamidomethyl)			15800029	0	8.51857e-10	142.12	2.7294e-12	2	1101.96
QLTVQMMQNPQILAALQER	UniProtKB:P55209				1065546956	0	4.75036e-07	142.11	1.71604e-12	2	1106.59
AGVLSQADYLNLVQcETLEDLK	UniProtKB:P61421	C15(Carbamidomethyl)			221705938	0	1.13585e-10	142.1	2.48549e-12	2	1240.13
AVcMLSNTTAIAEAWAR	Ensembl:CON_ENSBTAP00000016242;UniProtKB:Q71U36;UniProtKB:P68363;UniProtKB:Q13748;UniProtKB:Q6PEY2;UniProtKB:P68366;UniProtKB:Q9NY65	C3(Carbamidomethyl)			2512333344	0	2.54682e-07	141.89	2.86587e-12	2	932.958
LTTPTYGDLNHLVSATMSGVTTcLR	UniProtKB:Q13885;UniProtKB:Q9BVA1;UniProtKB:P68371;UniProtKB:P04350;UniProtKB:P07437	C23(Carbamidomethyl)			29478667417	0	7.22984e-13	141.74	2.85069e-12	2	1354.68
VILPVSVDEYQVGQLYSVAEASK	UniProtKB:Q00169				46394965	0	8.53678e-10	141.67	1.66244e-12	2	1247.66
ITISSLQDLTLYNPER	UniProtKB:Q9NZI8				417268517	0	1.62503e-06	141.55	1.5463e-12	2	932.007
NVDMLSELVQEYDEPILK	UniProtKB:Q99733				4.91238e+08	0	1.8456e-07	141.44	2.70824e-12	2	1068.04
LSLQNccLTGAGcGVLSSTLR	UniProtKB:P13489	C6(Carbamidomethyl); C7(Carbamidomethyl); C13(Carbamidomethyl)			278436674	0	4.18872e-06	141.36	3.32522e-12	2	1134.06
NADMSEEMQQDSVEcATQALEK	UniProtKB:P63167	C15(Carbamidomethyl)			1640693637	0	5.27775e-11	141.34	3.7945e-12	2	1257.53
EIVNSEEcIINEITGEESVK	UniProtKB:O95391	C8(Carbamidomethyl)			1.01381e+07	0	3.56079e-06	140.89	4.07189e-12	2	1146.56
IAQLEEELEEEQGNTELINDR	UniProtKB:P35579				724256339	0	2.63526e-10	140.21	4.9755e-12	2	1236.6
SAQSLEYcAELLGLDQDDLR	UniProtKB:Q9UM54	C8(Carbamidomethyl)			3540875	0	1.24685e-09	140.15	5.16644e-12	2	1148.54
GQVLNSDELQELYEGLR	UniProtKB:O00764				3.52683e+08	0	2.26299e-08	140.06	3.98556e-12	2	981.994
MTLSNPSELDELMSEEAYEK	UniProtKB:P23434				355312319	0	4.21414e-08	140.04	5.53181e-12	2	1158.51
YTNLSYIGEGAYGMVcSAYDNVNK	UniProtKB:P28482	C16(Carbamidomethyl)			1.69528e+08	0	1.68674e-12	139.74	6.52306e-12	2	1345.11
LASTNSSVLGADLPSSMK	UniProtKB:Q13428				3.59086e+08	0	4.67362e-08	139.72	3.88721e-12	2	889.455
SINPDEAVAYGAAVQAAILMGDK	UniProtKB:P34931;UniProtKB:P08107				1.29725e+09	0	1.34305e-08	139.49	4.48268e-12	2	1152.58
GPLLEDGALSQAVSAGASSPEFTK	UniProtKB:Q8NCA5				1.94477e+08	0	1.68257e-10	139.36	4.4022e-12	2	1166.59
WVTTASLLDYDTVAGADK	UniProtKB:Q15393				825883952	0	4.05462e-09	139.24	4.8692e-12	2	963.48
EVGDGTTSVVIIAAELLK	UniProtKB:P17987				9.46314e+08	0	1.54864e-07	139.09	1.43163e-12	2	908.02
DNMAQEGVILDDVDSSVcR	UniProtKB:Q9BV86	C18(Carbamidomethyl)			5.16017e+07	0	1.72326e-09	138.47	7.35273e-12	2	1061.98
ITVVGVGQVGMAcAISILGK	UniProtKB:P07195	C13(Carbamidomethyl)			1178427268	0	1.67101e-09	138.35	1.45998e-12	2	987.065
GGSGGSYGGGGSGGGYGGGSGSR	UniProtKB:CON_P35527;UniProtKB:P35527				1.18517e+08	0	9.52972e-11	138.21	5.54501e-12	2	896.369
GWFDAEGQALDGVSISDLK	UniProtKB:P27694				551438376	0	1.33723e-08	137.83	7.46453e-12	2	1004.49
SVNESLNNLFITEEDYQALR	UniProtKB:Q00610				1033396200	0	3.86058e-09	137.64	7.6494e-12	2	1178.09
QVYEEEYGSSLEDDVVGDTSGYYQR	UniProtKB:P08758				1.3675e+08	0	4.94309e-12	137.29	1.19934e-11	2	1444.62
SSQTSGTNEQSSAIVSAR	UniProtKB:O60763				1.80409e+08	0	1.96695e-06	137.28	8.13186e-12	2	905.438
ANcIDSTASAEAVFASEVK	UniProtKB:P22087	C3(Carbamidomethyl)			4.43008e+07	0	6.06455e-07	137.04	9.24629e-12	2	985.47
NLGIESQDVMQQATNAILR	UniProtKB:Q7L014				38769199	0	1.10211e-08	136.98	6.72601e-12	2	1051.05
APVAGTcYQAEWDDYVPK	UniProtKB:P30086	C7(Carbamidomethyl)			1790580451	0	5.32157e-12	136.82	1.06117e-11	2	1035.47
NELMYQLEQDHDLQAILQER	UniProtKB:Q08211				5.17862e+09	0	3.88282e-12	136.79	1.01711e-11	2	1243.61
ISFGTDYGccIVELGK	UniProtKB:Q06265	C9(Carbamidomethyl); C10(Carbamidomethyl)			160496688	0	1.65843e-07	136.68	9.94446e-12	2	909.922
AVSSAIAQLLGEVAQGNENYAGIAAR	UniProtKB:Q9Y490				1296748995	0	5.82912e-09	136.57	6.16048e-12	3	858.452
LcSLLDSEDYNTcEGAFGALQK	UniProtKB:Q92973	C2(Carbamidomethyl); C13(Carbamidomethyl)			384119310	0	1.5303e-10	136.48	1.30501e-11	2	1246.06
LcYVALDFEQEMATAASSSSLEK	UniProtKB:CON_P60712;UniProtKB:P63261;UniProtKB:Q6S8J3	C2(Carbamidomethyl)			4143843676	0	3.13026e-13	136.38	1.30641e-11	2	1275.6
sSIGTGYDLSASTFSPDGR	UniProtKB:P25788	N-Term(Acetyl)			281632799	0	6.34162e-08	136.37	1.15487e-11	2	980.45
ELGGESNFGDALLDAGESMK	UniProtKB:Q99961				142204513	0	2.55963e-08	136.34	1.16114e-11	2	1020.46
IISNAScTTNcLAPLAK	UniProtKB:P04406	C7(Carbamidomethyl); C11(Carbamidomethyl)			15216644744	0	1.57961e-07	136.3	8.5494e-12	2	917.467
TLVLSNLSYSATEETLQEVFEK	UniProtKB:P19338				3392417616	0	5.44081e-07	136.17	7.35508e-12	3	834.437
GHYTEGAELVDSVLDVVRK	UniProtKB:Q13885;UniProtKB:Q9BVA1;UniProtKB:P68371;UniProtKB:Q13509;UniProtKB:P07437				1.52485e+10	0	1.49176e-11	136.12	7.59785e-12	2	1044.05
EVAAFAQFGSDLDAATQQLLSR	UniProtKB:P25705				4.76883e+08	0	1.25607e-09	136.05	8.34705e-12	2	1169.6
AcADATLSQITNNIDPVGR	UniProtKB:P62873	C2(Carbamidomethyl)			859475786	0	7.39972e-08	136.04	1.07481e-11	2	1008.5
LSSVASNGGGAGGAGGGAAGDK	UniProtKB:Q96F45				1.66215e+07	0	2.31115e-08	135.84	1.1127e-11	2	859.407
ITAEDcTMEVTPGAEIQDGR	UniProtKB:Q6UN15	C6(Carbamidomethyl)			1.37e+07	0	7.35466e-07	135.74	1.38877e-11	2	1097
SQDAEVGDGTTSVTLLAAEFLK	UniProtKB:Q99832				1620623265	0	4.65908e-11	135.74	8.92998e-12	2	1126.58
EADIDGDGQVNYEEFVQMMTAK	UniProtKB:P62158				1189055604	0	1.18939e-09	135.63	1.61463e-11	2	1245.55
DGAVNGPSVVGDQTPIEPQTSIER	UniProtKB:P49321				339685891	0	1.19847e-06	135.39	1.30456e-11	2	1233.61
TVNELQNLTAAEVVVPR	UniProtKB:Q9NZI8				670176163	0	9.69782e-08	135.34	4.67133e-12	2	927.016
TGTDSNSTESSETSTGSLcK	UniProtKB:Q8N3X1	C19(Carbamidomethyl)			1.25348e+07	0	4.47273e-07	135.06	1.40911e-11	2	1024.94
SAVDYNTcAGVWSQDK	UniProtKB:Q9Y5A9	C8(Carbamidomethyl)			42083032	0	5.4772e-07	134.92	1.41904e-11	2	900.897
FFLQGIQLNTILPDAR	UniProtKB:P11279				238683204	0	5.26137e-06	134.9	4.29247e-12	2	923.521
TDcSPIQFESAWALTNIASGTSEQTK	UniProtKB:P52292	C3(Carbamidomethyl)			4.37872e+07	0	2.28311e-09	134.9	1.95693e-11	2	1421.66
LFIGGLSFETTDESLR	UniProtKB:Q32P51;UniProtKB:P0C7M2;UniProtKB:P09651				16420491566	0	3.89583e-05	134.84	1.18081e-11	2	892.956
MNLASSFVNGFVNAAFGQDK	UniProtKB:Q13200				9.61733e+07	0	1.35492e-08	134.8	1.57354e-11	2	1059.01
AIFTTGQGASAVGLTAYVQR	UniProtKB:P49736				0	0	1.2729e-08	134.79	8.53301e-12	2	1006.04
NYGSYSTQASAAAATAELLK	UniProtKB:O14828				1.92334e+08	0	1.32537e-08	134.7	1.47058e-11	2	1009
NADmSEEMQQDSVEcATQALEK	UniProtKB:P63167	M4(Oxidation); C15(Carbamidomethyl)			2.01254e+07	0	9.32025e-09	134.65	1.84957e-11	2	1265.53
TQGNVFATDAILATLMScTR	UniProtKB:O15371	C18(Carbamidomethyl)			1.66079e+07	0	2.53896e-08	134.47	1.42838e-11	2	1085.55
LPIDVTEGEVISLGLPFGK	UniProtKB:P26599				879132190	0	1.57316e-11	134.33	4.19528e-12	2	992.564
TILSNQTVDIPENVDITLK	UniProtKB:P32969				1.65536e+09	0	2.03763e-07	134.32	6.92133e-12	2	1057.08
DQQEAALVDMVNDGVEDLR	UniProtKB:P09211				3.44298e+09	0	8.63401e-07	134.16	1.98952e-11	2	1058.99
AFLQGGQEATDIALLLR	UniProtKB:Q14203				2.02724e+08	0	1.32549e-07	134.13	7.73893e-12	2	908.499
TVQLTSSELESTLETLK	UniProtKB:P42704				286832440	0	7.12644e-07	134.13	1.05266e-11	2	939.999
GPGLGSTQGQTIALPAQGLIEFR	UniProtKB:Q00577				6.92714e+07	0	4.55729e-10	133.86	7.32669e-12	2	1156.13
AADSQNSGEGNTGAAESSFSQEVSR	UniProtKB:P12270				2.16137e+07	0	1.71546e-08	133.82	2.38972e-11	2	1243.54
ETVGDLEAMNEMNDELQENAR	UniProtKB:Q14203				21611140	0	4.97679e-09	133.75	2.3343e-11	2	1204.52
SGLNQGAISTLQSSDILNLTK	UniProtKB:Q9ULT8				1.73513e+08	0	1.45704e-09	133.71	9.55894e-12	2	1080.58
VVAQSTNSEEIIEGEYNTVMLAIGR	UniProtKB:Q16881				46182651	0	1.06423e-07	133.66	1.62287e-11	3	908.465
FSLcSDNLEGISEGPSNR	UniProtKB:Q14C86	C4(Carbamidomethyl)			2.45115e+07	0	1.53864e-06	133.6	2.05926e-11	2	991.453
LQVELDNVTGLLSQSDSK	UniProtKB:P35579				1235652924	0	6.01321e-09	133.49	1.20704e-11	2	973.518
AIENIDTLTNLESLFLGK	UniProtKB:Q15435				2.06984e+08	0	5.98069e-08	133.38	9.94164e-12	2	996.04
VALVNDSLSDVTSTTSSR	UniProtKB:Q7Z2W4				90348590	0	1.53297e-06	133.08	1.7834e-11	2	926.473
mLPTIIADNAGYDSADLVAQLR	UniProtKB:P78371	M1(Oxidation)			6.53244e+08	0	6.32051e-11	133.02	1.7663e-11	2	1182.11
TTDDTTTDNYIAQGK	UniProtKB:Q7Z2T5				8.04369e+07	0	6.20858e-07	132.95	2.10908e-11	2	822.372
VFPGSTTEDYNLIVIER	UniProtKB:Q13263				213202696	0	1.80006e-06	132.92	1.6109e-11	2	977.008
EGPLGWSSDGSLGSVLLDSPSSPR	UniProtKB:Q9UGP4				3.38759e+07	0	2.66976e-09	132.92	2.48999e-11	2	1200.59
TELEDTLDTTAAQQELR	UniProtKB:P35580				117398101	0	2.64471e-08	132.8	2.33854e-11	2	967.473
ELVNDDEDIDWVQTEK	UniProtKB:P41743				35394487	0	2.60719e-07	132.8	2.60751e-11	2	974.444
NSDDTVTWDEYNIQMYDR	UniProtKB:Q14257				4.39761e+07	0	9.49982e-08	132.28	2.66144e-11	2	1132.96
QVTITGSAASISLAQYLINAR	UniProtKB:Q15365				1.10887e+08	0	2.77585e-09	132.14	8.47682e-12	2	1089.11
MAEDEAETIGNLIEEcGGLEK	UniProtKB:O00629	C16(Carbamidomethyl)			109850097	0	1.70347e-08	132.02	3.5322e-11	2	1154.51
FQSDSSSYPTVDSNSLLGQSR	UniProtKB:Q9UQ35				1.96487e+08	0	1.98266e-07	132	3.48257e-11	2	1138.03
EDLNGPFLNQLETDPSLDMK	UniProtKB:Q9UQ35				120659399	0	1.39033e-07	131.97	3.18205e-11	2	1138.55
ScSGVEFSTSGSSNTDTGK	UniProtKB:P45880	C2(Carbamidomethyl)			140704736	0	2.55997e-10	131.96	2.61118e-11	2	954.402
VEGTEPTTAFNLFVGNLNFNK	UniProtKB:P19338				5.28797e+08	0	7.8811e-09	131.95	2.32839e-11	2	1156.59
ETSGNLEQLLLAVVK	UniProtKB:P08758				1.63366e+08	0	1.38866e-05	131.93	6.82888e-12	2	807.471
SINPDEAVAYGAAVQAAILSGDK	UniProtKB:P11142				3.26913e+09	0	7.26298e-12	131.89	2.45979e-11	2	1130.58
ELEFLSMANVELSSLAR	UniProtKB:Q9BTT0				153276785	0	5.28808e-07	131.85	2.06716e-11	2	954.998
AcGDSTLTQITAGLDPVGR	UniProtKB:P62879	C2(Carbamidomethyl)			2.47436e+08	0	1.33191e-05	131.56	2.88754e-11	2	966.481
ATEDGEEDEEMIESIENLEDLK	UniProtKB:P49736				4.04114e+07	0	2.36115e-09	131.47	4.24219e-11	2	1269.56
AAAPAPEEEMDEcEQALAAEPK	UniProtKB:P26641	C13(Carbamidomethyl)			3592812266	0	1.15844e-09	131.43	4.00805e-11	2	1179.02
GVITDQNSDGYcQTGTMSR	UniProtKB:P15924	C12(Carbamidomethyl)			1.88685e+07	0	1.37096e-07	131.42	3.40255e-11	2	1045.45
EAIVTSEELGQDLEHVEVLQK	UniProtKB:Q13813				1276953627	0	4.48246e-12	131.13	2.42295e-11	2	1183.62
GLLSDSMTDVPVDTGVAAR	UniProtKB:O43399				862400132	0	3.49104e-08	131.1	3.16825e-11	2	952.477
DTNGENIAESLVAEGLATR	UniProtKB:Q7KZF4				116308989	0	6.00084e-08	130.99	3.3383e-11	2	980.49
FDGALNVDLTEFQTNLVPYPR	Ensembl:CON_ENSBTAP00000016242;UniProtKB:Q71U36;UniProtKB:P68363;UniProtKB:Q9BQE3;UniProtKB:Q13748;UniProtKB:Q6PEY2;UniProtKB:P68366;UniProtKB:Q9NY65				1.46763e+09	0	2.15343e-09	130.87	3.30128e-11	2	1205.11
SAYQTIDSAEAPADPFAVPEGR	UniProtKB:Q6RW13				99247062	0	5.69545e-07	130.81	4.50567e-11	2	1146.54
TcSPASLSQASADLEATLR	UniProtKB:Q14258	C2(Carbamidomethyl)			34923125	0	1.00723e-05	130.79	3.71822e-11	2	989.484
TLNASDVLSAMEEMEFQR	UniProtKB:Q9NRF9				6.8525e+07	0	2.81646e-08	130.67	4.10735e-11	2	1035.99
DLGLSESGEDVNAAILDESGKK	UniProtKB:P13667				433998848	0	5.00443e-10	130.56	4.03339e-11	2	1124.05
AALETDENLLLcAPTGAGK	UniProtKB:O75643	C12(Carbamidomethyl)			460506916	0	5.36619e-09	130.55	3.42023e-11	2	972.492
QEEMNSQQEEEEMETDAR	UniProtKB:Q13435				3.6911e+07	0	5.2664e-08	130.51	3.19001e-11	2	1106.94
HVGDLGNVTADKDGVADVSIEDSVISLSGDHcIIGR	UniProtKB:P00441	C32(Carbamidomethyl)			3705884654	0	4.75852e-14	130.45	4.13776e-11	3	1240.95
VLAVNQENEQLMEDYEK	UniProtKB:P12814				306597738	0	3.7178e-08	130.4	4.47706e-11	2	1026.48
YAALANLDNIFSAGQGGDQGSGFGTTGK	UniProtKB:P52594				175057620	0	5.37845e-11	130.23	5.25376e-11	2	1359.15
GYLVTQDELDQTLEEFK	UniProtKB:P19388				549055283	0	1.73089e-08	130.17	4.48544e-11	2	1014.49
YMNSGPVVAMVWEGLNVVK	UniProtKB:O60361;UniProtKB:P22392				2.24621e+08	0	1.9901e-08	130.16	3.11076e-11	2	1047.04
ENLATVEGNFASIDER	UniProtKB:Q13561				5.28832e+08	0	4.05714e-07	130.12	4.3297e-11	2	882.926
LEDTENWLYEDGEDQPK	UniProtKB:P34932				679835994	0	6.1933e-06	130.05	4.74753e-11	2	1040.95
QSQIQVFEDGADTTSPETPDSSASK	UniProtKB:Q14203				41480988	0	5.79854e-09	130.04	5.94995e-11	2	1313.09
GLGTDEESILTLLTSR	UniProtKB:P08758				3.10429e+09	0	2.9322e-05	130.01	2.4289e-11	2	852.96
IIMTSSASGIYGNFGQANYSAAK	UniProtKB:P51659				5.18676e+07	0	1.46599e-06	129.99	4.86619e-11	2	1176.07
TTITTTTTSSSGLGSPMIVGSPR	UniProtKB:Q96S97				0	0	8.09579e-06	129.88	3.81959e-11	2	1126.58
TIELSDDDFLGEcEcTLGQIVSSK	UniProtKB:O75131	C13(Carbamidomethyl); C15(Carbamidomethyl)			373954032	0	6.07593e-11	129.85	6.05506e-11	2	1358.63
GIVDQSQQAYQEAFEISK	UniProtKB:P63104				523544410	0	1.14395e-07	129.77	4.70151e-11	2	1021
DELILEGNDIELVSNSAALIQQATTVK	UniProtKB:P32969				1.09737e+08	0	1.5981e-10	129.71	2.38132e-11	2	1442.77
TLASSSSSSSSSSGAETPK	UniProtKB:Q9Y467				16065381	0	4.35163e-06	129.58	4.81923e-11	2	879.411
GYGFcEYQDQETALSAMR	UniProtKB:P33240;UniProtKB:Q9H0L4	C5(Carbamidomethyl)			113443600	0	4.79691e-06	129.25	5.59725e-11	2	1063.46
DFSALESQLQDTQELLQEENR	UniProtKB:P35579				1344013684	0	2.23681e-10	129.22	6.19912e-11	2	1247.1
DIAQQLQATcTSLGSSIQGLPTNVK	UniProtKB:O60664	C10(Carbamidomethyl)			5.24729e+08	0	1.03755e-11	129.17	4.16385e-11	2	1315.68
FGQAATMEGIGAIGGTPPAFNR	UniProtKB:Q15233				1.80825e+09	0	7.07658e-11	129.11	5.31727e-11	2	1082.04
ATTLSNAVSSLASTGLSLTK	UniProtKB:Q13492				267520448	0	5.91329e-09	129.07	2.24965e-11	2	961.53
DQQEAALVDmVNDGVEDLR	UniProtKB:P09211	M10(Oxidation)			12699414	0	1.29623e-07	129.01	6.43213e-11	2	1067
mAVTFIGNSTAIQELFK	UniProtKB:P07437	M1(Oxidation)			3.60869e+09	0	4.06239e-08	128.76	4.29205e-11	2	943.493
GASLEEVNDEGYTPLMEAAR	UniProtKB:O75179				31072044	0	3.88618e-06	128.75	6.82696e-11	2	1076.51
NSNVDSSYLESLYQScPR	UniProtKB:Q7Z2W4	C16(Carbamidomethyl)			2.63915e+07	0	2.15705e-07	128.74	6.78857e-11	2	1059.97
GVVPLAGTNGETTTQGLDGLSER	UniProtKB:P04075				2.50249e+09	0	4.67107e-09	128.63	5.13327e-11	2	1136.58
MLVDDIGDVTITNDGATILK	UniProtKB:P17987				2.08798e+09	0	4.65667e-09	128.52	4.0691e-11	2	1052.56
SGEEDFESLASQFSDcSSAK	UniProtKB:Q13526	C16(Carbamidomethyl)			396251063	0	3.62441e-08	128.35	6.79108e-11	2	1090.96
GIDVQQVSLVINYDLPTNR	UniProtKB:P60842;UniProtKB:Q14240				1.47702e+08	0	3.01756e-07	128.33	3.70023e-11	2	1072.57
MLPTIIADNAGYDSADLVAQLR	UniProtKB:P78371				2.16872e+09	0	5.68729e-11	128.32	4.74011e-11	2	1174.11
LLDFGSLSNLQVTQPTVGMNFK	UniProtKB:P08708				4094699076	0	2.07963e-09	128.19	4.12486e-11	2	1205.14
AGYVDFENGQWATDDIPDDLNSIR	UniProtKB:P55265				60452300	0	1.05198e-09	128.17	9.20604e-11	2	1356.13
VGSGDTNNFPYLEK	UniProtKB:Q9NR45				464194620	0	1.20656e-05	128	6.34987e-11	2	770.868
NASTFEDVTQVSSAYQK	UniProtKB:Q14247				290547816	0	7.76043e-09	127.95	7.30599e-11	2	937.947
ALYDTFSAFGNILScK	UniProtKB:Q13310;UniProtKB:P11940	C15(Carbamidomethyl)			1716731478	0	2.92533e-07	127.79	6.90898e-11	2	903.947
LAPITSDPTEATAVGAVEASFK	UniProtKB:P14618				1919365540	0	2.94204e-10	127.74	5.36773e-11	2	1088.07
VLSVDWTDTGLLLSGGADNK	UniProtKB:Q9GZL7				172672632	0	3.23014e-09	127.66	5.43496e-11	2	1031.04
LGESVQDLSSFDEYSSELK	UniProtKB:Q9UI12				123024259	0	1.92833e-07	127.63	8.73533e-11	2	1067
cQLALQNVcDDVDNDDVSLK	UniProtKB:Q9C0B1	C1(Carbamidomethyl); C9(Carbamidomethyl)			7.21331e+06	0	1.95263e-10	127.56	9.86382e-11	2	1161.03
APNTPASGANGDGSmSQTQSGSTVK	UniProtKB:CON_P15636	M15(Oxidation)			840898096	0	7.60116e-10	127.43	1.01572e-10	2	1183.53
TEGDEEAEEEQEENLEASGDYK	UniProtKB:P12956				1.40462e+08	0	1.66993e-09	127.41	8.47846e-11	2	1251.01
TVNELQNLSSAEVVVPR	UniProtKB:O00425				106401772	0	3.37526e-09	127.3	4.80791e-11	2	927.998
IATSLDGFDVASVQQQR	UniProtKB:O60664				0	0	3.78283e-08	127.2	7.8162e-11	2	917.961
NINADEAAAMGAVYQAAALSK	UniProtKB:Q9Y4L1				167485694	0	6.52211e-10	127.18	8.2045e-11	2	1040.02
AEDGSVIDYELIDQDAR	UniProtKB:P07355				366388768	0	3.7365e-08	127.15	9.38126e-11	2	954.943
LALADAGDTVEDANFVEAMADAGILR	UniProtKB:Q9P2J5				2.12907e+08	0	3.17066e-11	127.13	8.83493e-11	2	1324.66
NNLSFIETSALDSTNVEEAFK	UniProtKB:Q15907				140950301	0	3.64565e-10	127.06	9.04834e-11	2	1165.08
GLGTDEDSLIEIIcSR	UniProtKB:P07355;UniProtKB:A6NMY6	C14(Carbamidomethyl)			1322796828	0	1.43465e-07	126.96	8.76373e-11	2	889.436
SVQNDSQAIAEVLNQLK	UniProtKB:P15924				164131084	0	2.4633e-07	126.94	5.53498e-11	2	928.994
ALFDFNGNDEEDLPFK	UniProtKB:P46108				166665966	0	3.51542e-06	126.9	9.79626e-11	2	935.923
GIGMGNIGPAGMGMEGIGFGINK	UniProtKB:P52272				1189507522	0	4.74781e-10	126.89	9.53746e-11	2	1089.53
AIEQADLLQEEDESPR	UniProtKB:P61966				74224684	0	1.34252e-06	126.88	9.02409e-11	2	921.947
TLDLSNNQLSEIPAELADcPK	UniProtKB:Q8N1G4	C19(Carbamidomethyl)			198616490	0	1.22375e-10	126.82	9.18082e-11	2	1164.58
AGYSQGATQYTQAQQTR	UniProtKB:Q96KR1				33804952	0	4.57337e-07	126.61	1.01464e-10	2	929.94
IYLTADNLVLNLQDESFTR	UniProtKB:Q99623				532734700	0	5.05473e-09	126.61	6.26443e-11	2	1113.09
IVASTLSNPELFEEWTGNVK	UniProtKB:P17174				2.22016e+08	0	6.58515e-08	126.42	7.72238e-11	2	1117.58
AELGTDLLSQLSLEDQK	UniProtKB:Q9UQE7				405298262	0	3.67232e-08	126.4	6.92529e-11	2	930.488
ALNLFQGSVEDTTGSQSLAALLNK	UniProtKB:P43246				548721826	0	8.22186e-12	126.14	6.52196e-11	2	1239.15
NVASGGGGVGDGVQEPTTGNWR	UniProtKB:O00429				1.42004e+07	0	6.14889e-09	126.11	1.22918e-10	2	1058
FTLTQSEADADILFNFSHFK	UniProtKB:Q14166				462339691	0	6.82689e-09	126.05	1.14001e-10	3	777.72
aAAAGGGGPGTAVGATGSGIAAAAAGLAVYR	UniProtKB:Q92922	N-Term(Acetyl)			3.60382e+08	0	2.97646e-09	125.91	8.05376e-11	3	852.78
TIMVNYNPETVSTDYDMcDR	UniProtKB:P27708	C18(Carbamidomethyl)			2.71345e+07	0	2.25654e-07	125.65	1.48496e-10	2	1212.52
TQLEELEDELQATEDAK	UniProtKB:P35579;UniProtKB:P35749;UniProtKB:P35580				1887141715	0	2.22405e-08	125.64	1.32314e-10	2	981.461
IAEFTTNLTEEEEK	UniProtKB:P35579				832893032	0	2.59243e-05	125.63	1.1443e-10	2	827.397
VFIMDNcEELIPEYLNFIR	UniProtKB:P07900	C7(Carbamidomethyl)			9.61669e+08	0	1.83623e-08	125.63	1.17781e-10	2	1208.1
TVAGGAWTYNTTSAVTVK	UniProtKB:P61513				142720310	0	1.00812e-07	125.58	8.76982e-11	2	913.976
ESTLEAIGYIcQDIDPEQLQDK	UniProtKB:Q14974	C11(Carbamidomethyl)			592059374	0	7.38393e-08	125.49	1.57134e-10	2	1283.11
TLTTMAPYLSTEDVPLAR	UniProtKB:Q8TEX9				319032464	0	1.44018e-06	125.47	9.49e-11	2	990.013
LFVTGLFSLNQDIPAFK	UniProtKB:O14980				9.42933e+07	0	1.45805e-07	125.43	2.9501e-11	2	955.546
LNIISNLDcVNEVIGIR	UniProtKB:P30153;UniProtKB:P30154	C9(Carbamidomethyl)			2678641147	0	9.89345e-07	125.38	6.67113e-11	2	971.524
SsGSPYGGGYGSGGGSGGYGSR	UniProtKB:P51991	S2(Phospho)	8.31867e-05	S(1): 0.0; S(2): 0.0; S(4): 100.0; Y(6): 0.0; Y(10): 0.0; S(12): 0.0; S(16): 0.0; Y(19): 0.0; S(21): 0.0	2.08555e+08	0	1.18461e-07	125.36	9.63884e-11	2	995.891
ILGQEGDASYLASEISTWDGVIVTPSEK	UniProtKB:Q12905				3.6811e+08	0	1.21878e-09	125.34	9.85732e-11	2	1483.26
AEGSDVANAVLDGADcIMLSGETAK	UniProtKB:P14618	C16(Carbamidomethyl)			3714067468	0	8.47975e-12	125.32	1.6984e-10	2	1247.58
QTIDNSQGAYQEAFDISK	UniProtKB:P27348				111441231	0	4.84524e-08	125.31	1.47265e-10	2	1007.97
SAATSGAGSTTSGVVSGSLGSR	UniProtKB:Q7Z6Z7				66280300	0	3.5652e-09	125.28	1.26806e-10	2	948.969
LQNELDNVSTLLEEAEK	UniProtKB:P35580				986481756	0	1.60843e-07	125.26	1.1092e-10	2	972.994
AQDPSEVLTMLTNETGFEISSSDATVK	UniProtKB:Q12905				1.09619e+08	0	1.52364e-11	125.26	1.55896e-10	2	1435.7
GQWDcSVccVQNESSSLK	UniProtKB:P49792	C5(Carbamidomethyl); C8(Carbamidomethyl); C9(Carbamidomethyl)			5.068e+07	0	2.2932e-08	125.09	1.36116e-10	2	1072.45
SIMGLEGEDEGAISMLSDNTAK	UniProtKB:Q8WVM8				42966774	0	4.34338e-05	125	1.72992e-10	2	1134.51
VVLPcSVQEYQVGQLYSVAEASK	UniProtKB:P48739	C5(Carbamidomethyl)			313373480	0	4.69954e-12	124.98	1.4091e-10	2	1277.64
DGLVSLLTTSEGADEPQR	UniProtKB:P51570				79788609	0	4.40438e-06	124.94	1.20524e-10	2	944.481
mLSAVSQQVQcIQEALR	UniProtKB:Q14204	M1(Oxidation); C11(Carbamidomethyl)			62859269	0	2.77366e-08	124.91	1.26718e-10	2	989
SLVEASSSGVSVLSLcEK	UniProtKB:Q9UQ80	C16(Carbamidomethyl)			9.59212e+07	0	7.42339e-07	124.89	1.02345e-10	2	926.483
TYADYESVNEcMEGVcK	UniProtKB:P84090	C11(Carbamidomethyl); C16(Carbamidomethyl)			2.10249e+09	0	9.40712e-08	124.89	1.22714e-10	2	1027.91
ENDENcGPTTTVFVGNISEK	UniProtKB:P49756	C6(Carbamidomethyl)			46384082	0	2.46395e-06	124.81	1.73758e-10	2	1106
SGETEDTFIADLVVGLcTGQIK	UniProtKB:P06733;UniProtKB:P13929;UniProtKB:P09104	C17(Carbamidomethyl)			1.40017e+08	0	4.81167e-10	124.8	1.37618e-10	2	1177.09
IDNSQVESGSLEDDWDFLPPK	UniProtKB:P27797				3.39248e+07	0	6.47709e-09	124.8	1.85433e-10	2	1196.06
ENPSEEAQNLVEFTDEEGYGR	UniProtKB:Q12874				15439557	0	1.46156e-07	124.77	1.83318e-10	2	1207.03
EEAGGGISEEEAAQYDR	UniProtKB:Q9UBE0				112180171	0	8.01076e-07	124.74	1.41362e-10	2	905.891
ImQSSSEVGYDAMAGDFVNMVEK	UniProtKB:P10809	M2(Oxidation)			71492569	0	4.13386e-10	124.56	2.02198e-10	2	1262.55
LQLEYcSLSAAScEPLASVLR	UniProtKB:P13489	C6(Carbamidomethyl); C13(Carbamidomethyl)			191262783	0	2.50813e-10	124.49	1.54806e-10	2	1184.09
AVAAAAAAAVTPAAIAAATTTLAQEEPVAAPEPK	UniProtKB:Q8IYB3				491815658	0	7.73264e-09	124.43	6.36602e-11	3	1038.9
MAVDGGcGDTGDWEGR	UniProtKB:Q8TBC4	C7(Carbamidomethyl)			46600415	0	6.29812e-07	124.08	1.03788e-10	2	841.831
QTNPSAMEVEEDDPVPEIR	UniProtKB:P55072				6.92906e+08	0	4.34149e-08	123.98	2.09611e-10	2	1078.49
LLQQVSQIYQSIEFSR	UniProtKB:Q14152				144050434	0	1.61544e-06	123.91	8.74056e-11	2	970.028
ITLEGPTEDVNVAQEQIEGMVK	UniProtKB:Q00341				117947227	0	5.64349e-09	123.82	1.78472e-10	2	1200.6
VITNQYNNPAGLYSSENISNFNNALESK	UniProtKB:O00151				3.16253e+08	0	9.13913e-09	123.74	2.25621e-10	3	1034.5
VGAGAPVYLAAVLEYLTAEILELAGNAAR	UniProtKB:P04908;UniProtKB:Q93077;UniProtKB:P20671;UniProtKB:Q96KK5;UniProtKB:Q99878;UniProtKB:P0C0S8;UniProtKB:Q7L7L0;UniProtKB:Q9BTM1;UniProtKB:P16104;UniProtKB:Q8IUE6				0	0	1.18205e-12	123.69	5.631e-11	2	1458.3
GVGTDEAcLIEILASR	UniProtKB:P50995	C8(Carbamidomethyl)			4.42838e+08	0	2.70848e-07	123.63	1.4204e-10	2	852.442
VVVVDDLLATGGTMNAAcELLGR	UniProtKB:P07741	C18(Carbamidomethyl)			1.93421e+09	0	9.03753e-08	123.61	1.31699e-10	3	792.084
TVDFTQDSNYLLTGGQDK	UniProtKB:Q9Y3F4				979673080	0	9.60749e-08	123.45	2.17659e-10	2	1001.48
NDQDTWDYTNPNLSGQGDPGSNPNK	UniProtKB:P14866				1066358678	0	1.75752e-08	123.43	2.70118e-10	2	1367.59
IIGATDSSGELMFLMK	UniProtKB:Q13185;UniProtKB:P83916				1426337856	0	5.70419e-07	123.42	1.67549e-10	2	856.936
QLEVYTSGGDPESVAGEYGR	UniProtKB:Q9Y262				1.95657e+08	0	4.58189e-09	123.42	2.33545e-10	2	1057.49
APGQLEcETAIAALNScLR	UniProtKB:Q9Y490	C7(Carbamidomethyl); C17(Carbamidomethyl)			96109676	0	3.47829e-08	123.38	2.00968e-10	2	1037.52
AmGIMNSFVNDIFER	UniProtKB:P33778;UniProtKB:P62807;UniProtKB:P58876;UniProtKB:Q93079;UniProtKB:P06899;UniProtKB:O60814;UniProtKB:Q99880;UniProtKB:Q99879;UniProtKB:Q99877;UniProtKB:P23527;UniProtKB:Q16778;UniProtKB:Q5QNW6;UniProtKB:P57053;UniProtKB:Q8N257	M2(Oxidation)			7550947464	0	7.94875e-06	123.34	2.05145e-10	2	880.414
NLSPYVSNELLEEAFSQFGPIER	UniProtKB:P23246				1.65807e+09	0	9.60901e-10	123.32	1.91356e-10	2	1320.16
NLQTcMEVLEALYDGSLGDcK	UniProtKB:Q9BXJ9	C5(Carbamidomethyl); C20(Carbamidomethyl)			3.96098e+08	0	8.60342e-10	123.24	2.71788e-10	2	1208.56
VIFLQGGGcGQFSAVPLNLIGLK	UniProtKB:Q9Y617	C9(Carbamidomethyl)			133554284	0	4.2002e-12	123.21	6.92417e-11	2	1194.66
ELEQVcNPIISGLYQGAGGPGPGGFGAQGPK	UniProtKB:P08107	C6(Carbamidomethyl)			16272608357	0	6.15113e-11	123.2	2.4123e-10	3	1019.17
YSEEANNLIEEcEQAER	UniProtKB:Q96HE7	C12(Carbamidomethyl)			88394982	0	2.01014e-07	123.13	2.33573e-10	2	1042.45
VGAIPANALDDGQWSQGLISAAR	UniProtKB:Q9Y490				2.68052e+08	0	4.03685e-09	122.95	1.81072e-10	2	1155.6
ILEDSGFDEQQEFR	UniProtKB:O60343				1.16766e+08	0	5.92366e-06	122.88	2.24305e-10	2	856.891
IITITGTQDQIQNAQYLLQNSVK	UniProtKB:P61978				1.08964e+10	0	1.04916e-07	122.85	1.03371e-10	2	1295.2
GIIWGEDTLMEYLENPK	UniProtKB:P99999				5.29505e+08	0	4.41661e-06	122.8	2.14305e-10	2	1004.5
SDATADDLIDVVEGNR	UniProtKB:Q9Y295				341777040	0	4.11596e-06	122.77	2.31803e-10	2	845.398
AIGSASEGAQSSLQEVYHK	UniProtKB:P28066				1.63054e+09	0	2.61912e-08	122.77	2.11801e-10	2	981.494
VVVLMGSTSDLGHcEK	UniProtKB:P22234	C14(Carbamidomethyl)			1.41264e+09	0	6.14872e-06	122.76	2.01855e-10	2	866.438
GQYFGELALVTNKPR	UniProtKB:P31323;UniProtKB:P13861				3.2622e+08	0	4.64266e-07	122.63	1.2828e-10	2	846.958
HSQAVEELAEQLEQTK	UniProtKB:P35579				9.10976e+08	0	4.57979e-10	122.58	2.17877e-10	2	920.46
LAADEDDDDDDEEDDDEDDDDDDFDDEEAEEK	UniProtKB:P06748				5.74774e+09	0	6.93687e-07	122.57	9.92157e-11	3	1241.75
VGEVTYVELLMDAEGK	UniProtKB:P52272				1309669056	0	1.24377e-07	122.55	2.3045e-10	2	876.933
YLLSQSSPAPLTAAEEELR	UniProtKB:Q12792				103205632	0	6.02741e-06	122.52	1.89422e-10	2	1038.04
EENIQTLLINPNIATVQTSQGLADK	UniProtKB:P27708				279758474	0	2.31794e-10	122.52	1.27233e-10	2	1355.72
LSSQEESIGTLLDAIIcR	UniProtKB:Q9Y3C4	C17(Carbamidomethyl)			59752301	0	8.01428e-06	122.43	1.5147e-10	2	1003.03
EILVGDVGQTVDDPYATFVK	UniProtKB:P23528				13113969347	0	2.27778e-08	122.41	1.96176e-10	2	1083.56
EYFGGFGEVESIELPMDNK	UniProtKB:Q14103				1097198754	0	2.71923e-09	122.33	3.07395e-10	2	1081
cDIEEATNQLLDVNLHENQK	UniProtKB:Q9BV44	N-Term(Acetyl); C1(Carbamidomethyl)			3.57462e+07	0	7.65432e-11	122.28	3.11576e-10	2	1213.08
NSLLAGGDDDTMSVISGISSR	UniProtKB:Q8N3U4				45044484	0	3.49551e-07	122.26	2.72364e-10	2	1048.01
LASDESLWQTLDLTGK	UniProtKB:Q13309				55146537	0	2.56335e-06	122.19	1.79463e-10	2	888.967
LGGTIDDcELVEGLVLTQK	UniProtKB:P50991	C8(Carbamidomethyl)			8.84428e+08	0	6.16667e-08	122.19	1.97793e-10	2	1030.54
SLETENSALQLQVTER	UniProtKB:P20700				26303715	0	5.78617e-06	122.15	1.8789e-10	2	909.476
NQGDEEGTEIDTLQFR	UniProtKB:O15160				159489552	0	5.61302e-07	122.11	2.94454e-10	2	926.425
WNSPAEEGSSDcEVFSK	UniProtKB:P34932	C12(Carbamidomethyl)			898814152	0	3.37459e-08	121.97	2.73701e-10	2	964.906
SEIIPMFSNLASDEQDSVR	UniProtKB:P30153				971443781	0	7.59203e-07	121.93	3.15956e-10	2	1069.51
QIVLTGILEQVVNcR	UniProtKB:Q96QK1	C14(Carbamidomethyl)			342446820	0	8.05539e-06	121.86	8.74811e-11	2	871.495
YFTQGNcVNLTEALSLYEEQLGR	UniProtKB:P52788	C7(Carbamidomethyl)			20293517	0	5.96477e-10	121.82	3.20773e-10	2	1353.17
GVVDSEDIPLNLSR	UniProtKB:Q12931				21604780632	0	3.19502e-05	121.7	2.0776e-10	2	757.398
EAALTSEEVGADLEQVEVLQK	UniProtKB:Q13813				95037267	0	4.9188e-10	121.69	2.4307e-10	2	1129.58
EEFASTcPDDEEIELAYEQVAK	UniProtKB:O00299	C7(Carbamidomethyl)			298311635	0	2.59917e-09	121.63	4.05199e-10	2	1287.07
NIADLMTQAGVEELESENK	UniProtKB:O75506				243165560	0	6.8289e-09	121.62	3.29727e-10	2	1046
DMESDYSGQGVDQLQR	UniProtKB:P04818				124891267	0	1.62382e-08	121.54	2.85527e-10	2	914.389
NYQFFIGENMNPDGMVALLDYR	UniProtKB:P13693				3.54568e+07	0	2.45252e-07	121.47	3.95562e-10	2	1304.12
IIILDEADSMTDGAQQALR	UniProtKB:P35250				9.80491e+06	0	6.63767e-10	121.45	2.76431e-10	2	1030.52
QLSSSVTGLTNIEEENcQR	UniProtKB:P46940	C17(Carbamidomethyl)			24730859	0	6.43675e-07	121.37	3.69798e-10	2	1083.02
GLDVPQVSLIINYDLPNNR	UniProtKB:P38919				0	0	6.32084e-08	121.17	1.31571e-10	2	1070.59
NLQLDYNQIScIEDGAFR	UniProtKB:O94813	C11(Carbamidomethyl)			2.14144e+07	0	5.37937e-07	121.15	3.92237e-10	2	1078.51
NILAEQLQAETELFAEAEEMR	UniProtKB:P35580				1.41174e+07	0	2.49069e-08	121.11	3.69031e-10	2	1218.1
SQMESMLISGYALNcVVGSQGMPK	UniProtKB:P17987	C15(Carbamidomethyl)			8.68519e+07	0	9.87009e-08	121.03	4.51386e-10	2	1294.11
QLETVLDDLDPENALLPAGFR	UniProtKB:Q9NYL9				0	0	6.0074e-06	120.97	1.79643e-10	2	1163.63
EAPAEGEAAEPGSPTAAEGEAASAASSTSSPK	UniProtKB:P29966				930572320	0	2.25491e-09	120.96	5.27665e-10	3	972.443
LGANSLLDLVVFGR	UniProtKB:P31040				8.99374e+07	0	5.08727e-05	120.95	8.29239e-11	2	737.433
VFLLGEEVAQYDGAYK	UniProtKB:P11177				268659651	0	5.66595e-06	120.95	3.08072e-10	2	901.457
ETENNQMTSESGATAGR	UniProtKB:O43164				1.52925e+07	0	2.6531e-05	120.91	3.19194e-10	2	891.884
mTDQEAIQDLWQWR	UniProtKB:P06748	M1(Oxidation)			974072962	0	6.15531e-06	120.82	4.01593e-10	2	918.421
VLFDPFELDTSVTPGR	UniProtKB:Q15269				1.27264e+08	0	9.7128e-06	120.76	2.66067e-10	2	896.969
YDAFGEDSSSAMGVENR	UniProtKB:Q9Y2X3				1.51687e+08	0	2.61553e-07	120.63	3.34656e-10	2	917.881
TPIGSFLGSLSLLPATK	UniProtKB:P24752				905274730	0	5.95244e-08	120.61	8.14216e-11	2	851.496
AcANPAAGSVILLENLR	UniProtKB:P00558	C2(Carbamidomethyl)			3205226352	0	7.7352e-08	120.57	2.06007e-10	2	884.979
SYSMIVNNLLKPISVEGSSK	UniProtKB:Q9HB71				2.25951e+09	0	7.53556e-11	120.48	3.0711e-10	2	1083.56
VSEGGPAEIAGLQIGDK	UniProtKB:O14907				190181490	0	5.14925e-07	120.44	2.7105e-10	2	820.932
TEFLSFMNTELAAFTK	UniProtKB:P31949				462942074	0	2.39228e-06	120.4	3.58648e-10	2	925.464
mALELLTQEFGIPIER	UniProtKB:P49588	M1(Oxidation)			2.6603e+07	0	2.99958e-07	120.29	2.23328e-10	2	938.506
ALTSADGASEEQSQNDEDNQGSEK	UniProtKB:Q92552				1.81146e+07	0	2.47437e-07	120.27	5.1229e-10	2	1255.53
ALDVGSGSGILTAcFAR	UniProtKB:P22061	C14(Carbamidomethyl)			433172955	0	5.90356e-08	120.26	3.56741e-10	2	847.931
LHLSGIDANPNALFPPVEFPAPR	UniProtKB:P49327				4982725224	0	2.21513e-13	120.26	2.20638e-10	2	1236.66
LPIVNEDDELVAIIAR	UniProtKB:P12268				166041278	0	3.60363e-09	120.17	1.39241e-10	2	890.501
LAQDFLDSQNLSAYNTR	UniProtKB:Q9NY33				55082857	0	3.8835e-07	120.17	3.99598e-10	2	978.486
VLAGETLSVNDPPDVLDR	UniProtKB:Q12906				1031517560	0	2.20698e-07	120.16	2.80378e-10	2	955.503
LFIGGLSFETTEESLR	UniProtKB:P22626				5412395850	0	8.84106e-07	120.14	3.24664e-10	2	899.967
LEGMLSQSVSSQYNMAGVR	UniProtKB:P54105				6.30678e+06	0	1.35194e-08	120.13	4.81373e-10	2	1028.99
LEQLDLGGNDLEVLPDTLGALPNLR	UniProtKB:Q14160				0	0	3.39266e-06	120.12	1.55688e-10	2	1338.23
mSATFIGNSTAIQELFK	UniProtKB:Q13885;UniProtKB:Q9BVA1;UniProtKB:P68371	M1(Oxidation)			1673801112	0	1.75207e-07	120.08	3.78464e-10	2	937.474
VIHDNFGIVEGLMTTVHAITATQK	UniProtKB:P04406				5355251805	0	5.4971e-12	120.05	1.97117e-10	3	865.803
EVAENQQNQSSDPEEEK	UniProtKB:O43491				1.04352e+08	0	5.14236e-08	120.02	4.6371e-10	2	980.925
LAVTSYNDIQDLMDSGNK	UniProtKB:Q12756				6.45921e+07	0	3.35748e-06	120.01	4.80842e-10	2	992.47
NEEDAAELVALAQAVNAR	UniProtKB:P22314				2141699000	0	2.27637e-09	119.84	3.9037e-10	2	942.477
INAGFGDDLNcIFNDDNAEK	UniProtKB:P24928	C11(Carbamidomethyl)			35733125	0	8.25399e-09	119.82	5.40546e-10	2	1121.49
TTTTNTQVEGDDEAAFLER	UniProtKB:Q05682				1.07627e+08	0	7.78619e-07	119.81	5.34061e-10	2	1049.48
IFSFLLNTLQENVNK	UniProtKB:Q9HAV4				292183684	0	2.79958e-06	119.68	2.40536e-10	2	890.483
AVELLGDIVQNcSLEDSQIEK	UniProtKB:P31930	C12(Carbamidomethyl)			206134276	0	5.93605e-09	119.61	4.76145e-10	2	1180.59
ILGENEEEEDLAESGR	UniProtKB:Q9Y4C8				2.89523e+06	0	3.53754e-06	119.55	5.17596e-10	2	895.416
NLSELQDTSLQQLVSQR	UniProtKB:Q5QJE6				8.30924e+07	0	2.59005e-07	119.48	3.32974e-10	2	980.015
FLYGcQAPTIcFVYQDPQGR	UniProtKB:Q16531	C5(Carbamidomethyl); C11(Carbamidomethyl)			2.83403e+08	0	7.56911e-08	119.47	6.62682e-10	2	1210.56
ALTLQDLDNIWAAQAGK	UniProtKB:Q93008;UniProtKB:O00507				98119638	0	3.11824e-07	119.43	2.86032e-10	2	914.492
RNDFQLIGIQDGYLSLLQDSGEVR	UniProtKB:P63241				3617282252	0	4.84883e-09	119.39	3.83332e-10	3	912.807
DNLAQQSFNMEQANYTIQSLK	UniProtKB:Q9NZZ3				141197838	0	6.20885e-08	119.33	5.99507e-10	2	1222.09
NNQFQALLQYADPVSAQHAK	UniProtKB:P26599				4428883502	0	9.98637e-08	119.32	5.04756e-10	2	1122.06
DALLSALSIQNYHLEcNETK	UniProtKB:Q01082	C16(Carbamidomethyl)			373084922	0	1.90879e-07	119.32	5.82235e-10	2	1160.06
NEVSLVAEGFLPEDGSGR	UniProtKB:O95163				137403749	0	9.43061e-07	119.3	5.01916e-10	2	938.46
ANPDPNccLGVFGLSLYTTER	UniProtKB:P62995	C7(Carbamidomethyl); C8(Carbamidomethyl)			1.74689e+08	0	1.16464e-07	119.27	6.77824e-10	2	1192.55
AIVDcIISIVEENPESK	UniProtKB:Q9UBF2	C5(Carbamidomethyl)			145344280	0	1.08685e-06	119.26	4.31383e-10	2	958.49
GAEDDELEEEADWIYR	UniProtKB:Q7KZ85				2.34703e+07	0	2.53125e-06	119.25	4.86276e-10	2	970.408
SGPFGQIFRPDNFVFGQSGAGNNWAK	UniProtKB:Q13885;UniProtKB:Q9BVA1;UniProtKB:P68371;UniProtKB:P04350;UniProtKB:P07437				29327254908	0	4.29105e-11	119.15	6.38558e-10	2	1399.68
GGGGYGGSGDGYNGFGNDGGYGGGGPGYSGGSR	UniProtKB:P09651				8.68106e+07	0	2.27102e-05	119.1	6.37279e-10	2	1437.58
IEDLSQQAQLAAAEK	UniProtKB:Q13765				2.85497e+09	0	1.46311e-07	119.09	3.92189e-10	2	807.924
DLGLPTEAYISVEEVHDDGTPTSK	UniProtKB:P51665				326000215	0	3.76221e-09	119.09	6.3918e-10	2	1287.12
mTVDESGQLIScSMDDTVR	UniProtKB:O75083	M1(Oxidation); C12(Carbamidomethyl)			1.71215e+07	0	9.7406e-10	119.08	6.03513e-10	2	1080.46
VQLDTIQGELNAPTQFK	UniProtKB:Q7Z3B4				3.89166e+07	0	7.60002e-07	119.07	2.98116e-10	2	951.511
VVAPTISSPVcQEQLVEAGR	UniProtKB:Q9Y490	C11(Carbamidomethyl)			1.49895e+08	0	1.30097e-08	119.01	3.54891e-10	2	1070.56
EVQQLQENLDSTVTQLAAFTK	UniProtKB:Q14789				1.14972e+07	0	2.73074e-08	118.99	3.76592e-10	2	1182.12
KLSEEEILENPDLFLTSEATDYGR	UniProtKB:Q14257				1046809536	0	1.9848e-12	118.99	6.16907e-10	2	1385.18
DVAEcGPQQELDLNSPR	UniProtKB:Q9BTE3	C5(Carbamidomethyl)			7.54587e+06	0	1.33526e-05	118.97	6.23685e-10	2	964.44
KYAPTEAQLNAVDALIDSMSLAK	UniProtKB:P13010				2484312976	0	8.25922e-15	118.95	3.89947e-10	2	1225.14
GVESQGMLLcASIEGINR	UniProtKB:P54577	C10(Carbamidomethyl)			157640218	0	1.69439e-07	118.91	5.40077e-10	2	967.482
NETGGGEGVEVLVNEPYEK	UniProtKB:Q00169				7.3657e+07	0	5.81684e-10	118.89	6.02677e-10	2	1010.49
aDVEDGEETcALASHSGSSGSK	UniProtKB:Q9UBF6	N-Term(Acetyl); C10(Carbamidomethyl)			48775158	0	2.09487e-09	118.76	6.40015e-10	2	1118.47
SNASLTNNQNLIQSLK	UniProtKB:P12270				263116032	0	2.07602e-06	118.74	3.76853e-10	2	872.965
SSGSPYGGGYGSGGGSGGYGSR	UniProtKB:P51991				2252714456	0	3.31409e-05	118.61	5.56461e-10	2	955.9
VDLNSNGFIcDYELHELFK	UniProtKB:P13797	C10(Carbamidomethyl)			3882615922	0	4.03791e-06	118.59	7.73275e-10	2	1157.03
LSNSDSQDIQGR	UniProtKB:O14545				8.31038e+07	0	5.12689e-05	118.58	4.7427e-10	2	660.315
NLEAVETLGSTSTIcSDK	UniProtKB:P05023;UniProtKB:P50993;UniProtKB:P13637;UniProtKB:Q13733	C15(Carbamidomethyl)			139094450	0	7.48424e-09	118.57	6.54459e-10	2	962.958
KLEEEQIILEDQNcK	UniProtKB:P35579	C14(Carbamidomethyl)			741801048	0	5.16928e-07	118.55	5.89407e-10	2	944.969
MLSAVSQQVQcIQEALR	UniProtKB:Q14204	C11(Carbamidomethyl)			310820774	0	1.3261e-07	118.55	5.00249e-10	2	981.004
mQNDAGEFVDLYVPRK	UniProtKB:P63220	N-Term(Acetyl)			3358533981	0	1.07212e-06	118.51	6.27838e-10	2	962.468
SQIFSTASDNQPTVTIK	UniProtKB:P11021				1524408710	0	1.41036e-05	118.48	4.76165e-10	2	918.975
EIEELQSQAQALSQEGK	UniProtKB:Q01082				168823532	0	1.47462e-08	118.46	5.92625e-10	2	944.469
QITAQAWDGTTDYQVEETSR	UniProtKB:O43719				70408234	0	9.57555e-10	118.43	8.06602e-10	2	1150.03
LNATNIELATVQPGQNFHMFTK	UniProtKB:P28066				2341089077	0	5.87272e-08	118.42	5.85159e-10	2	1237.63
LLAPDMFTESDDMFAAYFDSAR	UniProtKB:Q13523				2.81244e+07	0	3.34099e-09	118.41	8.44575e-10	2	1257.06
RAEISNAIDQYVTGTIGEDEDLIK	UniProtKB:P31939				55133545	0	1.63088e-08	118.35	6.49426e-10	2	1325.66
AAVPSGASTGIYEALELR	UniProtKB:P06733;UniProtKB:P13929;UniProtKB:P09104				6600835734	0	4.84317e-05	118.34	3.96211e-10	3	602.323
QGGGGGGGSVPGIER	UniProtKB:P52272				1538421883	0	5.37143e-05	118.3	4.54974e-10	2	642.823
cIALAQLLVEQNFPAIAIHR	UniProtKB:Q13838	C1(Carbamidomethyl)			404499194	0	3.8853e-09	118.29	1.78792e-10	2	1139.14
NEDEEEEEEEKDEAEDLLGR	UniProtKB:Q9Y5B9				1.03094e+09	0	1.0959e-06	118.28	7.18078e-10	2	1204
NQGGYGGSSSSSSYGSGR	UniProtKB:P09651				7.36583e+09	0	4.02016e-08	118.18	5.29075e-10	2	847.854
LNSNTQVVLLSATmPSDVLEVTK	UniProtKB:P60842	M14(Oxidation)			2.86461e+07	0	6.85125e-06	118.16	3.80517e-10	2	1238.16
TIGGGDDSFNTFFSETGAGK	Ensembl:CON_ENSBTAP00000016242;UniProtKB:Q71U36;UniProtKB:P68363;UniProtKB:Q9BQE3;UniProtKB:Q13748;UniProtKB:Q6PEY2				18333665040	0	1.54518e-08	118.14	7.59559e-10	2	1004.45
aAGVEAAAEVAATEIK	UniProtKB:P52272	N-Term(Acetyl)			2.97172e+09	0	2.37364e-07	118.1	4.64025e-10	2	771.906
AAQLIGTcSQNVAAIQEQVLGLGALR	UniProtKB:Q9NZL4	C8(Carbamidomethyl)			79461163	0	1.47675e-07	117.97	2.53346e-10	2	1341.24
GVVPLAGTDGETTTQGLDGLSER	UniProtKB:P09972				1866760842	0	1.91968e-06	117.93	6.84927e-10	2	1137.07
LTEVLEEANTLFNEVSR	UniProtKB:Q9NXX6				3.76868e+07	0	1.26389e-06	117.84	5.73639e-10	2	982.505
GAAAAAAASGAAGGGGGGAGAGAPGGGR	UniProtKB:Q68E01				9.76188e+06	0	4.26971e-11	117.77	7.74133e-10	2	976.968
TYLTITDTQLVNSLLEK	UniProtKB:Q5JTH9				0	0	9.88571e-07	117.76	2.86248e-10	2	976.539
YGSGSGQQSVTGVEASDDANSYWR	UniProtKB:Q9HCN8				1.82489e+07	0	9.04648e-09	117.68	9.53018e-10	2	1261.05
HELLLGAGSGPGAGQQQATPGALLQAGPPR	UniProtKB:Q96DI7				550819192	0	8.01251e-10	117.68	3.76788e-10	3	950.51
LLSELDQQSTEMPR	UniProtKB:O95793				1.58827e+08	0	1.71e-05	117.62	7.02392e-10	2	823.908
SLADELALVDVLEDK	UniProtKB:P07195				29965025804	0	5.9827e-06	117.59	4.29617e-10	2	815.444
SLLcGEDEAADENPESQEMLEEQLVR	UniProtKB:Q9HAV4	C4(Carbamidomethyl)			2.1086e+08	0	3.1075e-06	117.58	1.16106e-09	3	997.782
NVFIAQNVASLQELGGSEK	UniProtKB:Q5T4S7				0	0	6.28846e-07	117.55	4.7042e-10	2	1002.53
IGGDAATTVNNSTPDFGFGGQK	UniProtKB:Q92945				887137253	0	2.22488e-08	117.5	8.99809e-10	2	1077.51
EAGEGGEAEAPAAEGGK	UniProtKB:P29966				1.33203e+08	0	2.62538e-07	117.47	6.37366e-10	2	765.34
GAVLVcDMSSNFLSKPVDVSK	UniProtKB:Q9Y617	C6(Carbamidomethyl)			1109321806	0	7.41419e-09	117.4	6.95308e-10	2	1127.07
ALSVGNIDDALQcYSEAIK	UniProtKB:P31948	C13(Carbamidomethyl)			4.94034e+09	0	8.83455e-09	117.29	7.98157e-10	2	1034.01
FQQQLEQLNAMGFLNR	UniProtKB:Q9UHD9				1.16771e+08	0	8.6128e-07	117.28	6.82331e-10	2	968.994
EGGDGEEQDVGDAGR	UniProtKB:Q8N1G4				140215858	0	3.13432e-06	117.24	5.35718e-10	2	745.806
SEWGSLLEELVAEGK	UniProtKB:P17858				41010745	0	3.14271e-05	117.17	6.45344e-10	2	823.927
NVIDGDLcEQFNSMEPNK	UniProtKB:Q15393	C8(Carbamidomethyl)			412007786	0	4.87311e-09	117.17	9.47247e-10	2	1055.46
AAESLADPTEYENLFPGLK	UniProtKB:P35606				522086186	0	9.19541e-08	117.06	8.4501e-10	2	1033.01
LAATNALLNSLEFTK	UniProtKB:Q14974				5.69602e+09	0	1.59678e-06	117.02	3.79741e-10	2	803.446
DQAENEDGAQENTFSMDPQLER	UniProtKB:P50570				16951892	0	5.99999e-07	117.01	1.08502e-09	2	1262.53
EGQWDcSAcLVQNEGSSTK	UniProtKB:P49792	C6(Carbamidomethyl); C9(Carbamidomethyl)			40440825	0	3.8281e-09	117	9.29094e-10	2	1078.46
EQMIDLQNLLTTQSPSVK	UniProtKB:Q9BVJ6				1.64926e+08	0	8.39867e-07	116.95	6.48299e-10	2	1023.03
DLADELALVDVIEDK	UniProtKB:P00338				2.53248e+09	0	1.72352e-06	116.93	5.80424e-10	2	829.442
FEDEELQQILDDIQTK	UniProtKB:O15514				6.50891e+07	0	4.6064e-07	116.93	8.81028e-10	2	982.485
LDLLSDTNMVDFAMDVYK	UniProtKB:P60228				181970664	0	4.31727e-07	116.92	9.83864e-10	2	1045.5
SGTLAcTGSLVNNTANDRK	UniProtKB:CON_P15636	C6(Carbamidomethyl)			20227179296	0	8.8657e-07	116.89	9.00231e-10	2	989.987
LNSNTQVVLLSATMPSDVLEVTK	UniProtKB:P60842				798243624	0	5.09911e-08	116.88	4.11053e-10	2	1230.17
VIPATDLSEQISTAGTEASGTGNMK	UniProtKB:P06737				3.43948e+08	0	4.88822e-12	116.81	1.01921e-09	2	1239.61
VEDMAELTcLNEASVLHNLK	UniProtKB:P35579;UniProtKB:P35580	C9(Carbamidomethyl)			1780544219	0	7.92501e-08	116.69	9.88944e-10	2	1143.56
ALGTPNNEVWPEVESLQDYK	UniProtKB:P06493				117373079	0	2.71148e-08	116.66	9.85442e-10	2	1145.06
YHTSQSGDEMTSLSEYVSR	UniProtKB:P08238				8490620064	0	1.17208e-10	116.65	1.09412e-09	2	1088.98
SVSTPSEAGSQDSGDGAVGSR	UniProtKB:Q13409				1.93424e+08	0	5.75595e-08	116.57	1.05421e-09	2	975.936
MQQNIQELEEQLEEEESAR	UniProtKB:P35579				259638998	0	1.91671e-10	116.55	1.22882e-09	2	1167.04
VVTSEDQVQEGTK	UniProtKB:Q8WWK9				45351339	0	5.37143e-05	116.44	8.15108e-10	2	710.35
SLAGSSGPGASSGTSGDHGELVVR	UniProtKB:P29692				2064839714	0	7.08729e-07	116.36	1.13361e-09	2	1093.03
SIEGTADDEEEGVSPDTAIR	UniProtKB:Q29RF7				1.87012e+07	0	5.37143e-05	116.3	1.16496e-09	2	1045.98
LASVPAGGAVAVSAAPGSAAPAAGSAPAAAEEK	UniProtKB:P05387				10813467891	0	9.84977e-09	116.24	5.89575e-10	2	1387.73
ENAEVDGDDDAEEMEAK	UniProtKB:P05198				1.00827e+08	0	1.42784e-07	116.21	7.00883e-10	2	933.863
AMGIMNSFVNDIFER	UniProtKB:P33778;UniProtKB:P62807;UniProtKB:P58876;UniProtKB:Q93079;UniProtKB:P06899;UniProtKB:O60814;UniProtKB:Q99880;UniProtKB:Q99879;UniProtKB:Q99877;UniProtKB:P23527;UniProtKB:Q16778;UniProtKB:Q5QNW6;UniProtKB:P57053;UniProtKB:Q8N257				113427802855	0	4.92035e-05	116.19	1.05636e-09	2	872.412
FFESFGDLSSADAILGNPK	UniProtKB:CON_Q3SX09				194444156	0	1.34306e-08	116.18	1.11639e-09	2	1007.99
ALESSLWELQALQR	UniProtKB:Q9BVI4				52034793	0	1.76769e-05	116.13	6.27858e-10	2	822.445
PTGDFDSKPSWADQVEEEGEDDK	UniProtKB:O75821				7.51762e+08	0	3.16733e-11	116.1	1.3372e-09	3	861.032
AILFSQPLQITDTQQGcIAPVELR	UniProtKB:Q8NBF2	C17(Carbamidomethyl)			9.93708e+06	0	1.2114e-09	116.09	6.06235e-10	2	1349.72
DVQDSLTVSNEAQTAK	UniProtKB:P52907				3.5277e+08	0	1.41277e-06	116.07	1.05518e-09	2	853.414
EIGINEDQFQEAcTSPLAK	UniProtKB:Q96G28	C13(Carbamidomethyl)			1.64794e+07	0	7.34483e-06	116.04	1.24032e-09	2	1075.51
NFSNMDDEENYSAASK	UniProtKB:O43264				46492720	0	9.12555e-07	115.99	8.16357e-10	2	911.362
IMDSSQNAYNEDTSALVAR	UniProtKB:Q9BRX5				2.48401e+07	0	2.57944e-08	115.98	1.32634e-09	2	1042.98
GTLGGLFSQILQGEDIVR	UniProtKB:Q9BZZ5				594099376	0	1.33445e-07	115.92	4.46729e-10	2	952.026
ISNTAISISDHTALAQFcK	UniProtKB:P22102	C18(Carbamidomethyl)			694038092	0	8.9959e-09	115.87	9.73945e-10	2	1039.03
IPEISIQDMTAQVTSPSGK	UniProtKB:P21333				260012392	0	5.51568e-08	115.86	8.30527e-10	2	1001.52
YDSIPVSTSLLGDTSDTTSTGLAQR	UniProtKB:Q5JS54				17179954	0	2.45723e-07	115.76	1.29372e-09	2	1293.14
mEDSASASLSSAAATGTSTSTPAAPTAR	UniProtKB:O76021	N-Term(Acetyl)			1.58335e+07	0	7.5741e-06	115.68	1.6144e-09	2	1320.11
GMLDMcGFDTGALDVIR	UniProtKB:P10155	C6(Carbamidomethyl)			0	0	1.71248e-06	115.66	1.29194e-09	2	935.92
DATNVGDEGGFAPNILENK	UniProtKB:P06733				15937026434	0	6.59944e-09	115.54	1.32688e-09	2	980.97
VFIMDScDELIPEYLNFIR	UniProtKB:P08238	C7(Carbamidomethyl)			1620323809	0	6.29521e-09	115.54	1.3118e-09	2	1187.59
NSAVETVEQELLFVGSETGK	UniProtKB:Q9Y2R4				0	0	1.72126e-08	115.45	1.12245e-09	2	1069.04
TVSLGAGAKDELHIVEAEAMNYEGSPIK	UniProtKB:P06748				7626683604	0	5.95202e-11	115.42	1.18405e-09	3	977.161
SIVEGIIEEEEEDEEGSESISK	UniProtKB:Q9Y570				126438692	0	2.46667e-10	115.41	1.65177e-09	2	1219.06
GVIINTASVAAFEGQVGQAAYSASK	UniProtKB:Q99714				6.98963e+07	0	2.35242e-07	115.4	1.02513e-09	2	1220.13
HLVMGDIPAAVNAFQEAASLLGK	UniProtKB:P49321				7.86538e+08	0	2.34037e-10	115.39	6.09933e-10	3	784.759
IDLENTLEQEQEALVNR	UniProtKB:Q16204				1.98211e+08	0	5.35646e-07	115.37	1.25657e-09	2	1007.5
VGGSDEEASGIPSR	UniProtKB:Q9NQ55				5.19084e+07	0	6.76632e-06	115.31	1.05454e-09	2	680.821
DAEDAMDAMDGAVLDGR	UniProtKB:Q01130				1402426563	0	4.26868e-08	115.28	1.03043e-09	2	876.361
RPDVVENQPDAASQLNVDASGNLAK	UniProtKB:Q9NZL9				66063093	0	9.02011e-09	115.24	1.23057e-09	3	870.107
SALASVIMGLSPILGK	UniProtKB:P30153				4.53094e+08	0	1.00553e-05	115.18	2.04788e-10	2	778.968
FNcEENQHSDScYK	UniProtKB:Q96BR5	C3(Carbamidomethyl); C12(Carbamidomethyl)			1.16369e+08	0	4.05939e-06	115.1	8.15993e-10	2	909.352
VGWSTMQASLDLGTDK	UniProtKB:Q92499				263756642	0	5.7986e-06	115.07	1.30972e-09	2	854.917
LFVGGLSFDTNEQSLEQVFSK	UniProtKB:Q14011				1.81482e+08	0	3.25798e-09	115.02	1.34928e-09	2	1173.09
LLTETEDWLYEEGEDQAK	UniProtKB:Q92598				979991549	0	2.98702e-08	114.98	1.66278e-09	2	1085
GHVDILAPTVQELAALEK	UniProtKB:Q92499				3.53792e+08	0	1.39637e-09	114.97	4.02164e-10	2	952.539
VMTIPYQPMPASSPVIcAGGQDR	UniProtKB:Q15365	C17(Carbamidomethyl)			1005116416	0	5.507e-09	114.97	1.65069e-09	3	825.732
HTGPGILSMANAGPNTNGSQFFIcTAK	UniProtKB:P62937	C24(Carbamidomethyl)			4056271140	0	4.29697e-11	114.9	1.78575e-09	2	1396.17
NLNPEDIDQLITISGMVIR	UniProtKB:P33991				5.20468e+08	0	1.60039e-08	114.87	7.63924e-10	2	1071.08
AASADSTTEGTPADGFTVLSTK	UniProtKB:O75367				1.61242e+08	0	2.28161e-06	114.84	1.59848e-09	2	1064.01
LVNAcLAEELPHIHAFEQK	UniProtKB:Q9H3K6	C5(Carbamidomethyl)			849628064	0	3.87958e-11	114.83	1.15591e-09	2	1110.07
AMLSGPGQFAENETNEVNFR	UniProtKB:Q15369				486793246	0	1.32048e-05	114.81	1.72552e-09	2	1106.01
AEYEFDSPYWDDISDSAK	UniProtKB:Q14012;UniProtKB:Q8IU85				9.06077e+06	0	5.35135e-07	114.79	1.46266e-09	2	1069.44
FGNPLLVQDVESYDPVLNPVLNR	UniProtKB:Q14204				4.1138e+07	0	4.5988e-09	114.78	9.42425e-10	2	1299.68
QIIQQNPSLLPALLQQIGR	UniProtKB:P54727				734642411	0	2.84137e-08	114.75	1.71335e-10	2	1065.63
HSSVYPTQEELEAVQNMVSHTER	UniProtKB:Q12906				1.81801e+09	0	5.37438e-14	114.71	1.96044e-09	3	891.087
SIPAYLAETLYYAMK	UniProtKB:P08758				124442236	0	2.73947e-05	114.7	9.96202e-10	2	867.457
VVDYSQFQESDDADEDYGR	UniProtKB:Q9H1E3				4.18011e+08	0	4.66377e-07	114.59	1.48433e-09	2	1119.46
NLFEDQNTLTSIcEK	UniProtKB:P55060	C13(Carbamidomethyl)			1115580554	0	1.24197e-05	114.56	1.57125e-09	2	906.426
LTTDFNVIVEALSK	UniProtKB:P05455				286776191	0	2.01357e-06	114.48	7.23952e-10	2	775.429
EcPSDEcGAGVFMASHFDR	UniProtKB:P62979	C2(Carbamidomethyl); C7(Carbamidomethyl)			2702477090	0	2.01465e-07	114.43	1.38498e-09	2	1086.44
ADDPSSYMEVVQAANTSGNWEELVK	UniProtKB:Q00610				355286495	0	3.71188e-10	114.24	2.27586e-09	2	1370.63
VQGSDSDEEVVVATTR	UniProtKB:P26640				4.8114e+07	0	4.78555e-07	114.22	1.61481e-09	2	846.413
TDLNPDNLQGGDDLDPNYVLSSR	UniProtKB:P12277				3450848871	0	1.5046e-10	114.15	2.16852e-09	2	1259.59
IAIPGLAGAGNSVLLVSNLNPER	UniProtKB:P26599				2696040080	0	6.19284e-11	114.11	3.51276e-10	2	1138.15
TIGTGLVTNTLAMTEEEK	UniProtKB:P49411				1200786872	0	1.10061e-08	114.07	1.30587e-09	2	954.494
VQLVGLDEESSEFIcR	UniProtKB:P61962	C15(Carbamidomethyl)			113157810	0	5.12107e-06	114.05	1.75543e-09	2	940.957
ASGPGLNTTGVPASLPVEFTIDAK	UniProtKB:P21333				316605632	0	1.43626e-06	114.03	9.15471e-10	2	1171.63
VNPTVFFDIAVDGEPLGR	UniProtKB:P62937				1509243965	0	4.57253e-06	113.99	1.31578e-09	2	973.507
AIAGVINQPYYNYEAGPDAVLGR	UniProtKB:O95861				185212252	0	1.13304e-05	113.88	1.68513e-09	2	1226.12
EGTDSSQGIPQLVSNISAcQVIAEAVR	UniProtKB:Q99832	C19(Carbamidomethyl)			904101972	0	1.03314e-10	113.88	1.77435e-09	2	1415.21
LITSVADVVNNDPMVGSK	UniProtKB:P06737				226483484	0	2.24845e-06	113.85	1.16418e-09	2	929.993
NATDLQNSSMSEEELTK	UniProtKB:P40855				1.39394e+07	0	1.63911e-07	113.8	2.00097e-09	2	948.931
MTVDESGQLIScSMDDTVR	UniProtKB:O75083	C12(Carbamidomethyl)			109986885	0	1.42698e-08	113.8	2.10665e-09	2	1072.47
ELGLVDGQELAVADVTTPQTVLFK	UniProtKB:Q8TBC4				111569467	0	6.73336e-09	113.77	8.94716e-10	2	1272.19
FDTGNLcMVTGGANLGR	UniProtKB:P62701	C7(Carbamidomethyl)			3699297080	0	1.5675e-06	113.75	1.87866e-09	2	891.919
MmDYLQGSGETPQTDVR	UniProtKB:Q14697	M2(Oxidation)			1.30264e+08	0	4.37873e-07	113.75	2.07116e-09	2	972.432
WcNSGSQEEGYSQYQR	UniProtKB:Q6I9Y2	C2(Carbamidomethyl)			1.1846e+07	0	1.08345e-07	113.74	1.61396e-09	2	989.905
GMYGIENEVFLSLPcILNAR	UniProtKB:P07195	C15(Carbamidomethyl)			1.02918e+09	0	2.01947e-09	113.74	1.48166e-09	2	1148.59
NAFAcFDEEATGTIQEDYLR	UniProtKB:P19105;UniProtKB:O14950	C5(Carbamidomethyl)			19321282	0	3.8717e-10	113.74	2.41471e-09	2	1175.53
TAFDEAIAELDTLNEDSYK	UniProtKB:P27348				8.94174e+09	0	5.01463e-09	113.71	2.17247e-09	2	1073
EAPATQASSTTQLTDTQVLAAENK	UniProtKB:Q9UNF1				1.22115e+08	0	5.04725e-05	113.68	1.89847e-09	2	1238.11
TVQTAAANAASTAASSAAQNAFK	UniProtKB:O15126				1.26034e+07	0	2.64886e-07	113.6	2.1027e-09	2	1076.52
DAGYEYLcIDDcWMAPQR	UniProtKB:P06280	C8(Carbamidomethyl); C12(Carbamidomethyl)			3.06352e+07	0	1.6463e-06	113.6	1.92787e-09	2	1131.96
FVDEEDGGDGQAGPDEGEVDScLR	UniProtKB:O15511	C22(Carbamidomethyl)			4.4022e+07	0	1.07826e-08	113.54	2.08968e-09	2	1277.02
VGLIGScTNSSYEDMGR	UniProtKB:Q99798	C7(Carbamidomethyl)			148929137	0	7.70772e-06	113.49	2.03933e-09	2	923.412
VDATEESDLAQQYGVR	UniProtKB:P07237				756624104	0	5.36546e-07	113.46	2.01042e-09	2	890.923
ASLLTDEEDVDMALDQR	UniProtKB:P52948				1.29547e+08	0	1.21095e-06	113.46	2.16865e-09	2	960.954
FPVFNMSYNPAENAVLLcTR	UniProtKB:P53621	C18(Carbamidomethyl)			44306047	0	2.14444e-07	113.45	2.23556e-09	2	1172.07
FLDGNELTLADcNLLPK	UniProtKB:O00299	C12(Carbamidomethyl)			805089244	0	1.41204e-07	113.44	1.69293e-09	2	966.993
SGTLAcTGSLVNNTANDR	UniProtKB:CON_P15636	C6(Carbamidomethyl)			3.28855e+08	0	5.89956e-08	113.42	2.12775e-09	2	925.94
TVLSANADHMAQIEGLMDDVDFK	UniProtKB:Q9Y4L1				1.72385e+08	0	7.34765e-12	113.37	2.44626e-09	2	1260.6
SLSVLSSSTIIANPDIPEAYK	UniProtKB:P27694				1.8866e+08	0	7.97664e-07	113.35	1.19525e-09	2	1103.09
STLINSLFLTDLYPER	UniProtKB:Q15019				2.7096e+08	0	1.08093e-05	113.34	9.87837e-10	2	941.512
TQASSSFQDSSQPAGK	UniProtKB:P46087				156154120	0	2.19708e-05	113.32	1.93823e-09	2	813.379
LFDIFSQQVATVIQSR	UniProtKB:Q96QK1				37986870	0	1.38454e-07	113.32	8.27114e-10	2	926.512
DLYANTVLSGGTTmYPGIADR	UniProtKB:CON_P60712;UniProtKB:P63261	M14(Oxidation)			1316949124	0	3.0472e-09	113.28	2.30976e-09	2	1116.04
VADLTEQYNEQYGAVR	UniProtKB:Q9BWF3				4.97556e+08	0	1.16338e-06	113.27	2.10857e-09	2	928.445
YVASYLLAALGGNSSPSAK	UniProtKB:P05387				6.11203e+09	0	6.66004e-08	113.24	1.30464e-09	2	934.995
SNEDVNSSELDEEYLIELEK	UniProtKB:Q99614				153238704	0	3.46385e-08	113.17	2.73795e-09	2	1178.05
AIEDEGGNPDEIEITSEGNK	UniProtKB:Q15424				81753673	0	3.4812e-10	113.16	2.51046e-09	2	1058.98
VAEcSTGTLDYILQR	UniProtKB:Q9C0B1	C4(Carbamidomethyl)			154143040	0	1.28814e-05	113.14	1.92878e-09	2	863.429
EMLNSVMQELEDYSEGGPLYK	UniProtKB:P49792				2.62385e+07	0	1.08643e-07	113.11	2.81879e-09	2	1216.57
YNLDASEEEDSNK	UniProtKB:O95218				128665366	0	2.0319e-05	113.09	1.47714e-09	2	757.313
LMNDFSAALNNFQAVQR	UniProtKB:Q86Y82				3.68563e+07	0	7.0342e-07	113.08	2.16251e-09	2	969.976
mNAQETATGMAFEEPIDEK	UniProtKB:O43719	M1(Oxidation)			33441331	0	7.676e-08	113.06	2.42459e-09	2	1064.47
AQQEDALAQQAFEEAR	UniProtKB:Q13951				64653863	0	3.0348e-07	113.02	2.29437e-09	2	902.923
FDYSGVGSSDGNSEESTLGK	UniProtKB:Q9NUJ1				60739747	0	2.98865e-08	112.98	2.36242e-09	2	1018.44
WVGGPEIELIAIATGGR	UniProtKB:P48643				1027898556	0	2.87036e-08	112.95	9.23484e-10	2	869.982
VAIAALEVLEEENLAENADK	UniProtKB:P04181				3.10872e+08	0	1.20906e-10	112.85	1.77274e-09	2	1071.05
FGIVTSSAGTGTTEDTEAK	UniProtKB:P82979				9.54833e+07	0	2.85661e-07	112.77	2.39491e-09	2	936.45
EIQSSNLETAMSVIGDR	UniProtKB:Q9NX55				5.27956e+07	0	5.42479e-06	112.76	2.24101e-09	2	925.456
LGGSLADSYLDEGFLLDK	UniProtKB:P78371				1976824349	0	4.57069e-09	112.75	2.00993e-09	2	956.986
EVFGSSLPSNWQDISLEDSR	UniProtKB:Q8N5N7				1.05526e+07	0	1.01114e-05	112.74	2.75898e-09	2	1133.54
LYIGNLNESVTPADLEK	UniProtKB:Q9NZI8				1977992347	0	7.4445e-08	112.72	1.61144e-09	2	938.493
EMEENFAVEAANYQDTIGR	UniProtKB:P08670				1161809697	0	1.53061e-08	112.71	2.7706e-09	2	1093.98
VPVLQLDSGNYLFSTSAIcR	UniProtKB:P56192	C19(Carbamidomethyl)			0	0	1.4492e-10	112.68	1.80116e-09	2	1120.58
MAVTFIGNSTAIQELFK	UniProtKB:P07437				5651653168	0	6.76328e-08	112.67	1.27591e-09	2	935.504
VLNNMEIGTSLFDEEGAK	UniProtKB:P00558				2.25648e+09	0	9.88917e-07	112.67	2.49504e-09	2	983.975
WQASSLPADDLcTENAIMLK	UniProtKB:Q14204	C12(Carbamidomethyl)			154430682	0	7.69443e-10	112.64	2.80746e-09	2	1132.04
ESRQEEMNSQQEEEEMETDAR	UniProtKB:Q13435				4.98807e+07	0	4.86011e-06	112.61	2.59746e-09	3	862.352
FDVNTSAVQVLIEHIGNLDR	UniProtKB:Q00610				8.25846e+08	0	1.02173e-08	112.5	1.81552e-09	2	1120.58
TAFDEAIAELDTLSEESYK	UniProtKB:P63104				3.27054e+09	0	7.36659e-09	112.49	2.7824e-09	2	1066.51
mSVQPTVSLGGFEITPPVVLR	UniProtKB:P06748	M1(Oxidation)			8677477228	0	4.8989e-09	112.46	1.03009e-09	2	1122.11
ELDALDANDELTPLGR	UniProtKB:Q08211				2.81005e+09	0	5.37143e-05	112.33	2.26285e-09	2	871.436
VNPDTGYINYDQLEENAR	UniProtKB:P34896				38813558	0	3.9861e-09	112.33	3.01635e-09	2	1055.99
mTLSNPSELDELMSEEAYEK	UniProtKB:P23434	M1(Oxidation)			1.79932e+07	0	7.718e-08	112.33	3.26342e-09	2	1166.52
YGGPPPDSVYSGQQPSVGTEIFVGK	UniProtKB:O60506				128918950	0	1.32524e-07	112.32	2.88908e-09	2	1283.63
LGDAVEQGVINNTVLGYFIGR	UniProtKB:P41250				125013308	0	1.38175e-07	112.26	1.15798e-09	2	1118.11
YAPTEAQLNAVDALIDSMSLAK	UniProtKB:P13010				2.68579e+08	0	4.86883e-11	112.25	1.99994e-09	2	1161.1
KPADDQDPIDALSGDLDScPSTTETSQNTAK	UniProtKB:P20810	C19(Carbamidomethyl)			5.16969e+07	0	4.33642e-15	112.24	3.90372e-09	3	1093.17
SAVEAQNEVTENPK	UniProtKB:Q32MZ4				136063037	0	2.32498e-05	112.23	2.27905e-09	2	758.37
HTDVQFYTEVGEITTDLGK	UniProtKB:Q9Y5B9				112079259	0	4.52515e-11	112.19	2.9216e-09	2	1077.02
LASQANIAQVLAELK	UniProtKB:P63010;UniProtKB:Q10567				2.04706e+09	0	1.81275e-05	112.18	6.64967e-10	2	784.954
NITGTDDQVQQAMNSLK	UniProtKB:Q96PZ0				0	0	5.03479e-08	112.18	2.90231e-09	2	931.947
IDNSQVESGSLEDDWDFLPPKK	UniProtKB:P27797				388683520	0	2.86463e-10	112.14	3.26885e-09	3	840.406
VDENFDcVEADDVEGK	UniProtKB:O14929	C7(Carbamidomethyl)			389198672	0	7.26817e-06	112.13	2.39582e-09	2	920.887
VAFGSLAANGPTTLVDK	UniProtKB:Q9UKX7				219695540	0	3.1381e-05	112.12	1.40613e-09	2	830.952
SFGGGTGSGFTSLLMER	UniProtKB:A6NHL2				122855328	0	1.25742e-06	112.11	2.65849e-09	2	852.406
DTLVQGLNEAGDDLEAVAK	UniProtKB:Q9Y6E2				1.00689e+07	0	3.45161e-08	112.11	2.67694e-09	2	979.478
NcDYQQEADNScIYVNK	UniProtKB:P36954	C2(Carbamidomethyl); C12(Carbamidomethyl)			42643001	0	3.2918e-06	112.02	2.69311e-09	2	1060.94
VWLDPNETNEIANANSR	UniProtKB:P84098				3.48645e+09	0	2.31815e-07	112.01	2.9527e-09	2	971.969
QQLSAEELDAQLDAYNAR	UniProtKB:Q86V81				699052021	0	4.76831e-08	111.98	2.9307e-09	2	1017.99
NPAPPIDAVEQILPTLVR	UniProtKB:P52292				3.87297e+08	0	2.08027e-07	111.97	5.23195e-10	2	972.063
ATDTINSQGQFPSYLETVTK	UniProtKB:Q86Y56				48083303	0	8.90236e-09	111.88	2.85626e-09	2	1100.55
LNEAAAGLNQAATELVQASR	UniProtKB:Q9Y490				0	0	2.46937e-08	111.84	1.93445e-09	2	1014.03
AEGSSTASSGSQLAEGK	UniProtKB:Q9NZB2				5.62075e+07	0	2.95794e-07	111.82	2.66286e-09	2	783.868
QAYTGNNSSQIQAAMK	UniProtKB:O94826				1.21408e+07	0	2.35692e-05	111.81	2.82555e-09	2	856.412
LcYVALDFEQEmATAASSSSLEK	UniProtKB:CON_P60712;UniProtKB:P63261;UniProtKB:Q6S8J3	C2(Carbamidomethyl); M12(Oxidation)			1.8944e+07	0	1.76453e-09	111.76	3.93416e-09	2	1283.59
DTPTQEDWLVSVLPEGSR	UniProtKB:Q9NQW7				8.01804e+07	0	3.39902e-05	111.68	2.97016e-09	2	1015
TAAELLQSQGSQAGGSQTLK	UniProtKB:Q14141				6.1964e+07	0	1.09593e-07	111.67	2.09064e-09	2	988.017
QIPVLQTNNGPSLTGLTTIAAHLVK	UniProtKB:O43324				9.08534e+08	0	9.86872e-12	111.67	4.779e-10	3	862.827
ATGATQQDANASSLLDIYSFWLK	UniProtKB:Q14978				123808105	0	2.45505e-08	111.63	2.84137e-09	2	1250.63
NQLDQEVEFLSTSIAQLK	UniProtKB:Q99471				4.68531e+08	0	2.31398e-08	111.55	1.77655e-09	2	1032.05
AIANEcQANFISIK	UniProtKB:P55072	C6(Carbamidomethyl)			1337000396	0	4.88391e-05	111.5	2.42648e-09	2	789.902
YKLDEDEDEDDADLSK	UniProtKB:O95218				449595752	0	2.66579e-09	111.49	2.91424e-09	2	950.398
AAAIGIDLGTTYScVGVFQHGK	UniProtKB:P08107	C14(Carbamidomethyl)			278219457	0	1.62672e-08	111.45	3.12167e-09	2	1133.07
RNQDLAPNSAEQASILSLVTK	UniProtKB:Q12905				1937276687	0	2.50616e-06	111.44	1.84007e-09	2	1128.1
QSTSFLVLQEILESEEK	UniProtKB:O00151				3.08379e+08	0	4.75105e-07	111.42	2.1608e-09	2	990.52
AGDMENAENILTVMR	UniProtKB:P42704				1.93286e+08	0	7.68443e-06	111.38	3.12436e-09	2	832.392
DGPLNMILDDGGDLTNLIHTK	UniProtKB:P23526				2.38005e+09	0	2.32755e-08	111.36	3.07627e-09	3	751.379
AIADTGANVVVTGGK	UniProtKB:P50990				1753633702	0	8.82636e-06	111.29	1.7617e-09	2	686.878
FQQQLEQLSAMGFLNR	UniProtKB:Q9UMX0				313391934	0	1.63726e-07	111.16	2.83041e-09	2	955.486
GLVEPVDVVDNADGTQTVNYVPSR	UniProtKB:P21333				285648540	0	3.69744e-10	111.16	3.45131e-09	2	1272.64
ALAAQNIVEDMEQR	UniProtKB:Q16222				1.78579e+07	0	4.23873e-06	111.15	3.00998e-09	2	794.396
FYPEDVSEELIQDITQR	UniProtKB:P26038				116321093	0	5.20419e-06	111.11	3.64074e-09	2	1041.51
EITLLMQTLNTLSTPEEK	UniProtKB:P40222				188753244	0	7.11474e-06	111.1	1.73685e-09	2	1031.06
GAYGGGYGGYDDYNGYNDGYGFGSDR	UniProtKB:P31943				1.18323e+08	0	6.6106e-08	111.08	3.34391e-09	2	1359.03
TTGEENGVEAEEWGK	UniProtKB:O00429				7.35478e+07	0	2.24792e-05	111.06	3.04637e-09	2	818.363
NFILDQTNVSAAAQR	UniProtKB:Q00839				3258769852	0	4.40498e-07	111.06	2.54732e-09	2	824.429
RcQEAQNGSESEVWTHQSK	UniProtKB:Q9Y2Z0	C2(Carbamidomethyl)			1.11114e+08	0	5.61723e-10	111.03	4.26931e-09	3	754.334
YcAYNIGDQSAINELMQMR	UniProtKB:Q9UHB9	C2(Carbamidomethyl)			59048744	0	2.21843e-08	110.96	4.44571e-09	2	1139.01
GHYTEGAELVDSVLDVVR	UniProtKB:Q13885;UniProtKB:Q9BVA1;UniProtKB:P68371;UniProtKB:Q13509;UniProtKB:P07437				4.31287e+09	0	1.03349e-09	110.95	2.98068e-09	2	979.999
NFTTEQVTAMLLSK	UniProtKB:P34932				1409688944	0	5.37143e-05	110.88	2.63307e-09	2	791.911
ILGADTSVDLEETGR	UniProtKB:P25705				4.07778e+08	0	1.85706e-06	110.83	3.05097e-09	2	788.397
ATDLGGTSQAGTSQR	UniProtKB:Q7Z2W4				104333059	0	4.91521e-06	110.78	3.0253e-09	2	725.35
LGFSEVELVQmVVDGVK	UniProtKB:P12277	M11(Oxidation)			542848312	0	1.37967e-05	110.78	1.80114e-09	2	933.007
ILQDVADEEIAALPR	UniProtKB:O60783				57642179	0	1.89992e-06	110.75	1.92259e-09	2	826.951
VGAGAPVYMAAVLEYLTAEILELAGNAAR	UniProtKB:Q6FI13;UniProtKB:Q16777				0	0	1.65488e-12	110.75	2.13252e-09	2	1467.28
MPSESAAQSLAVALPLQTK	UniProtKB:O43660				61804181	0	1.35214e-09	110.6	1.94181e-09	2	971.526
KSDIDEIVLVGGSTR	UniProtKB:P11021				79515156	0	4.04189e-07	110.52	2.00719e-09	2	794.936
DPVQEAWAEDVDLR	UniProtKB:P14618				2.77405e+09	0	2.93186e-06	110.5	3.77088e-09	2	821.892
ETIEDVEEMLNNLPGVTSVHSR	UniProtKB:Q9UNM6				2683475734	0	5.29307e-08	110.34	4.74324e-09	2	1235.1
TILQGSSEGTGLSALLPQPK	UniProtKB:Q92733				21608060	0	1.07487e-07	110.32	1.82449e-09	2	999.046
NQVAmNPTNTVFDAK	UniProtKB:P11142	M5(Oxidation)			1148315162	0	2.08782e-06	110.31	3.95954e-09	2	833.4
AANAAENDFSVSQAEMSSR	UniProtKB:Q8NE71				5.14965e+06	0	3.76963e-08	110.31	4.5587e-09	2	992.944
DLNSQADSLMTSSAFDTSQVK	UniProtKB:Q13813				186138984	0	3.67112e-09	110.29	4.98758e-09	2	1123.03
VIHDNFGIVEGLmTTVHAITATQK	UniProtKB:P04406	M13(Oxidation)			1103547911	0	2.74933e-10	110.25	2.56549e-09	3	871.128
IADSIGcSTNNILFLTDVTR	UniProtKB:Q9UHY7	C7(Carbamidomethyl)			1.89407e+08	0	5.4617e-09	110.19	3.56507e-09	2	1105.57
AAVATFLQSVQVPEFTPK	UniProtKB:P22314				3710040348	0	7.59906e-07	110.15	1.98475e-09	2	967.028
cDFTGTLIVVPDVSK	UniProtKB:Q14566	C1(Carbamidomethyl)			6.93995e+08	0	3.58974e-06	110.1	3.11348e-09	2	825.931
TNIVTASVDAINFHDK	UniProtKB:O00154				1279311956	0	1.0895e-05	110.1	3.47017e-09	2	872.949
ANATVDGLEQGYVVcPSEK	UniProtKB:Q9NVP1	C15(Carbamidomethyl)			3.82125e+07	0	9.11214e-09	110.09	4.85288e-09	2	1018.98
TGQATVASGIPAGWMGLDcGPESSK	UniProtKB:P00558	C19(Carbamidomethyl)			5.53898e+08	0	6.02258e-09	110.09	5.50816e-09	2	1239.08
NQVALNPQNTVFDAK	UniProtKB:P08107				16828594855	0	1.66309e-05	110.07	3.21722e-09	2	829.931
AVcmLSNTTAIAEAWAR	Ensembl:CON_ENSBTAP00000016242;UniProtKB:Q71U36;UniProtKB:P68363;UniProtKB:Q13748;UniProtKB:Q6PEY2;UniProtKB:P68366;UniProtKB:Q9NY65	C3(Carbamidomethyl); M4(Oxidation)			567361802	0	1.79593e-06	109.91	4.56105e-09	2	940.957
TQTAIASEDMPNTLTEAEK	UniProtKB:Q01082				1.87784e+08	0	3.15931e-07	109.87	4.9644e-09	2	1025.49
TFTDcFNcLPIAAIVDEK	UniProtKB:P62140;UniProtKB:P62136;UniProtKB:P36873	C5(Carbamidomethyl); C8(Carbamidomethyl)			8.82075e+08	0	5.21526e-09	109.84	5.00141e-09	2	1057.51
SIWAFGPDATGPNILVDDTLPSEVDK	UniProtKB:Q15029				5.78212e+07	0	1.64915e-07	109.83	4.07441e-09	2	1379.2
ASVPTIQDQASAMQLSQcAK	UniProtKB:Q9Y490	C18(Carbamidomethyl)			132699510	0	3.71377e-06	109.8	4.88381e-09	2	1067.52
NTMSLLAANNLLAGLR	UniProtKB:Q9UBQ7				74978657	0	5.17882e-05	109.75	2.05548e-09	2	836.464
AMQADISQAAQILSSDPSR	UniProtKB:P42166				8.43507e+07	0	1.01243e-08	109.75	4.38796e-09	2	994.998
QATDNSEISSATK	UniProtKB:P46100				5.66159e+06	0	1.87931e-05	109.72	3.66216e-09	2	676.317
SILIDESTQATEPEcMVPVVLGAK	UniProtKB:Q92900	C15(Carbamidomethyl)			112310436	0	2.5594e-07	109.67	3.84645e-09	2	1294.16
EELQSGVDAANSAAQQYQR	UniProtKB:P46940				3.14444e+07	0	1.65133e-06	109.65	5.35189e-09	2	1032.99
ELDPTNMTYITNQAAVYFEK	UniProtKB:P31948				902398828	0	1.00298e-07	109.65	5.78654e-09	2	1174.56
AIGVLTSGGDAQGMNAAVR	UniProtKB:Q01813;UniProtKB:P17858				145277912	0	9.81152e-08	109.64	3.86442e-09	2	894.461
NPYYGGESASITPLEDLYK	UniProtKB:P50395				129137780	0	5.43726e-10	109.63	5.37278e-09	2	1059.01
GSLLGcSIDITSAADSEAITFQK	UniProtKB:P17655	C6(Carbamidomethyl)			0	0	4.89256e-08	109.59	4.70594e-09	2	1192.6
IAEcSSQLAEEEEK	UniProtKB:P35580	C4(Carbamidomethyl)			434188885	0	1.4857e-06	109.58	4.42874e-09	2	811.866
VNAEGSVDSVFSQVcTHLDALK	UniProtKB:P00568	C15(Carbamidomethyl)			1.57917e+09	0	2.47803e-09	109.51	5.37106e-09	2	1188.58
FYSQAIELNPSNAIYYGNR	UniProtKB:P53041				132178916	0	4.34663e-07	109.5	5.35988e-09	2	1110.54
LTVVDTPGYGDAINcR	UniProtKB:Q15019	C15(Carbamidomethyl)			565780093	0	1.16094e-05	109.47	4.89992e-09	2	875.928
ENAEVDGDDDAEEMEAKAED	UniProtKB:P05198				3.29971e+07	0	8.26292e-06	109.45	3.65473e-09	2	1091.42
EGTGSTATSSSSTAGAAGK	UniProtKB:O15372				95470792	0	4.677e-07	109.38	4.75972e-09	2	814.379
TMADSSYNLEVQNILSFLK	UniProtKB:Q96AC1				1.32833e+07	0	6.19305e-08	109.38	4.38082e-09	2	1087.05
AQLSDYSDIVTTLDLAPPTK	UniProtKB:O60216				14703473	0	3.31011e-08	109.37	3.46082e-09	2	1074.56
TSIEDQDELSSLLQVPLVAGTVNR	UniProtKB:P56537				202753231	0	5.58575e-10	109.21	3.17388e-09	2	1292.68
GMSLNLEPDNVGVVVFGNDK	UniProtKB:P25705				3.38735e+08	0	7.39662e-08	109.18	4.99975e-09	2	1052.53
DIDDDLEGEVTEEcGK	UniProtKB:Q9UHX1	C14(Carbamidomethyl)			428435161	0	3.61658e-08	109.16	4.58115e-09	2	912.379
NPSTVEAFDLAQSNSEHSR	UniProtKB:O15067				633973232	0	3.61136e-06	109.16	6.06634e-09	2	1044.98
SLDLFNcEITNLEDYR	UniProtKB:Q9BTT0	C7(Carbamidomethyl)			3676925274	0	7.42928e-06	109.06	6.23434e-09	2	1001.46
TFHETLDccGSSTLTALTTSVLK	UniProtKB:P60033	C8(Carbamidomethyl); C9(Carbamidomethyl)			1569424056	0	1.6534e-10	109.06	6.54972e-09	2	1271.61
FDGcYcDSLENLADGYK	UniProtKB:P06280	C4(Carbamidomethyl); C6(Carbamidomethyl)			1.56499e+08	0	2.93725e-06	109.05	4.77894e-09	2	1013.91
EAASLSEWLSATETELVQK	UniProtKB:P46939				1.87e+07	0	3.34762e-06	108.96	5.14837e-09	2	1046.53
STQAATQVVLNVPETR	UniProtKB:O75439				37405194	0	1.09336e-05	108.95	2.9558e-09	2	857.467
NYILDQTNVYGSAQR	UniProtKB:Q9BUJ2				130370478	0	3.6984e-06	108.93	5.23779e-09	2	871.429
SVASNQSEMEFSSLQDMPK	UniProtKB:Q8N163				21221228	0	3.2134e-07	108.93	6.38795e-09	2	1057.97
GQNDLMGTAEDFADQFLR	UniProtKB:O15260				1.37487e+07	0	3.18648e-07	108.89	6.59619e-09	2	1014.46
LNSNTQVVLLSATMPSDVLEVTKK	UniProtKB:P60842				3091383532	0	1.13099e-09	108.87	2.04241e-09	3	863.141
DFLDGVYAFEYYPSTPGR	UniProtKB:O75369				0	0	3.38519e-07	108.85	6.49694e-09	2	1048.99
IFVGNVSAAcTSQELR	UniProtKB:Q96PK6	C10(Carbamidomethyl)			422556000	0	5.98868e-06	108.83	5.02202e-09	2	876.444
TSIDAYDNFDNISLAQR	UniProtKB:Q00610				663384067	0	4.08469e-07	108.83	6.54395e-09	2	971.961
GQAAVQQLQAEGLSPR	UniProtKB:P16152;UniProtKB:O75828				458303566	0	2.66987e-07	108.81	3.35514e-09	2	826.944
NTVANSPQTLLAGMNK	UniProtKB:P61221				312867232	0	2.2892e-06	108.81	4.12455e-09	2	829.934
IWcFGPDGTGPNILTDITK	UniProtKB:P13639	C3(Carbamidomethyl)			8403085874	0	2.13472e-06	108.81	5.77647e-09	2	1053.02
VAVLGASGGIGQPLSLLLK	UniProtKB:P40926				1378787962	0	3.82636e-07	108.78	2.50301e-10	2	897.055
AFVEDsEDEDGAGEGGSSLLQK	UniProtKB:Q8N9T8	S6(Phospho)	1	S(6): 100.0; S(17): 0.0; S(18): 0.0	2.12339e+07	0	5.37143e-05	108.78	6.27473e-09	2	1160.48
VENQENVSNLVIEDTELK	UniProtKB:Q01518				3.12473e+08	0	9.1646e-07	108.77	5.16025e-09	2	1037.02
AAEDDEDDDVDTK	UniProtKB:P06454				1.55869e+09	0	5.37143e-05	108.76	2.82123e-09	2	719.279
FGVEQDVDmVFASFIR	UniProtKB:P14618	M9(Oxidation)			4.36257e+07	0	2.59418e-07	108.75	5.74548e-09	2	938.459
EEISATQIIVcTPEK	UniProtKB:O75643	C11(Carbamidomethyl)			3.28292e+08	0	5.37143e-05	108.65	4.83404e-09	2	859.439
KYEQGFITDPVVLSPK	UniProtKB:P12268				1084408932	0	9.96535e-09	108.65	2.7046e-09	2	911.001
QNLYDLDEDDDGIASVPTK	UniProtKB:Q9BY77				33915264	0	5.37143e-05	108.64	6.96174e-09	2	1054.49
NTNDANScQIIIPQNQVNR	UniProtKB:P50395;UniProtKB:P31150	C8(Carbamidomethyl)			443221462	0	3.53347e-08	108.64	6.71281e-09	2	1100.03
GAIDDLQQGELEAFIQNLNLAK	UniProtKB:Q03701				7.96346e+07	0	1.8588e-06	108.54	3.64802e-09	3	800.761
YLLETSGNLDGLEYK	UniProtKB:P43490				174476088	0	5.10454e-05	108.52	5.26705e-09	2	857.933
TSQEELLAEVVQGQSR	UniProtKB:Q6PJT7				28949250	0	2.39271e-05	108.51	4.50409e-09	2	887.463
SFAVGTLAETIQGLGAASAQFVSR	UniProtKB:Q8TEX9				1.5091e+08	0	4.07083e-08	108.51	3.61412e-09	3	794.425
MDTDLETMDLDQGGEALAPR	UniProtKB:O75643				2.348e+08	0	4.97945e-09	108.47	7.34917e-09	2	1089.48
aDDLDFETGDAGASATFPMQcSALR	UniProtKB:P63241;UniProtKB:Q6IS14	N-Term(Acetyl); C21(Carbamidomethyl)			680078336	0	1.06402e-10	108.47	8.77577e-09	2	1344.59
LLASANLEEVTMK	UniProtKB:P35659				484503310	0	5.37143e-05	108.37	3.69687e-09	2	709.883
IVSQLLTLMDGLK	UniProtKB:P55072				1036276081	0	4.54444e-05	108.35	1.75607e-09	2	715.919
EILGTAQSVGcNVDGR	UniProtKB:P30050	C11(Carbamidomethyl)			2.70683e+09	0	1.39479e-06	108.3	6.09541e-09	2	838.409
AVQFGTGELcDAISAVEEK	UniProtKB:Q96EK5	C10(Carbamidomethyl)			2.19212e+08	0	2.27114e-07	108.29	7.16872e-09	2	1012.48
GGINLTATcPQSELDAETVK	UniProtKB:Q9Y295	C9(Carbamidomethyl)			1.8792e+08	0	4.59345e-08	108.29	6.72841e-09	2	1052.52
VIESEDYGQQLEIVcLIDPGcFR	UniProtKB:Q9Y3A5	C15(Carbamidomethyl); C21(Carbamidomethyl)			0	0	2.14716e-09	108.25	8.26296e-09	2	1370.66
LQLDNQYAVLENQK	UniProtKB:Q9UKY7				1.13985e+08	0	2.36064e-05	108.24	4.78324e-09	2	838.437
NDVLDSLGISPDLLPEDFVR	UniProtKB:Q9UBE0				626988028	0	1.51915e-08	108.24	4.80574e-09	2	1107.58
RTMMAcGGSIQTSVNALSADVLGR	UniProtKB:Q99832	C6(Carbamidomethyl)			703684452	0	6.3308e-08	108.22	6.75337e-09	3	832.415
TLMELLNQMDGFDTLHR	UniProtKB:P62333				467166928	0	3.46588e-05	108.05	6.4417e-09	2	1017.51
LESLSAATTFEPLEPVK	UniProtKB:Q8N1F7				345586080	0	2.96676e-05	108	3.76016e-09	2	916.495
GQASQITASNLVQNYK	UniProtKB:Q9BRX5				24926367	0	1.52475e-07	107.99	4.97533e-09	2	861.449
GLGTDEDTIIDIITHR	UniProtKB:P08133				1.71056e+09	0	5.37143e-05	107.92	4.70747e-09	3	590.313
FQDGDLTLYQSNTILR	UniProtKB:P09211				3.59453e+09	0	1.29131e-06	107.92	5.7899e-09	2	942.482
EDEKGDDVDDPENQNSALADTDASGGLTK	UniProtKB:Q02952				60644706	0	1.46519e-05	107.89	1.02662e-08	3	1002.77
TFSHELSDFGLESTAGEIPVVAIR	UniProtKB:P30101				2248884154	0	7.36233e-15	107.88	5.5225e-09	2	1288.16
VWGNVVTVEWADPVEEPDPEVMAK	UniProtKB:O43390				0	0	2.54339e-08	107.87	9.15081e-09	2	1348.64
GGGGSGGYYGQGGMSGGGWR	UniProtKB:P31942				64970417	0	1.11909e-06	107.81	6.43184e-09	2	902.88
ADATNVNNWHWTER	UniProtKB:O95433				670286826	0	3.76118e-05	107.76	7.22905e-09	2	857.391
sQKQEEENPAEETGEEK	UniProtKB:O43768	N-Term(Acetyl)			123240670	0	5.1245e-07	107.74	7.68309e-09	2	1002.43
mVQQccTYVEEITDLPIK	UniProtKB:O00232	M1(Oxidation); C5(Carbamidomethyl); C6(Carbamidomethyl)			4.26273e+07	0	4.53798e-08	107.71	8.91476e-09	2	1122.03
PEIVDTcSLASPASVcR	UniProtKB:P09960	C7(Carbamidomethyl); C16(Carbamidomethyl)			483791204	0	8.98897e-09	107.7	7.76182e-09	2	931.445
GNDISSGTVLSDYVGSGPPK	UniProtKB:P30086				1501708801	0	1.48809e-07	107.65	7.55364e-09	2	975.477
IMLNTPEDVQALVSGK	UniProtKB:O00231				925895864	0	2.26552e-06	107.64	4.91507e-09	2	857.956
VQETGDIVISNAYVDLAPTSGTSAK	UniProtKB:P51659				0	0	3.19545e-07	107.62	6.91408e-09	2	1268.64
AENNSEVGASGYGVPGPTWDR	UniProtKB:Q08211				5.81227e+08	0	9.02771e-09	107.55	9.2748e-09	2	1081.99
LQQEETQLEQSIQAGR	UniProtKB:Q9UBC2				4.60349e+07	0	3.98957e-07	107.48	6.81188e-09	2	929.47
DVLQAETSQQLccQK	UniProtKB:Q9UNH7	C12(Carbamidomethyl); C13(Carbamidomethyl)			6.65326e+07	0	3.13679e-05	107.44	8.43632e-09	2	904.418
STGEAFVQFASQEIAEK	UniProtKB:P31943;UniProtKB:P55795				7650176768	0	3.15483e-07	107.44	7.63398e-09	2	921.452
AGTDPSHMPTGPQAAScLDLNLVTR	UniProtKB:Q9BQG0	C17(Carbamidomethyl)			0	0	2.0254e-07	107.41	9.39983e-09	3	870.424
EAVVNTQELLDLLVK	UniProtKB:Q6P2Q9				557384828	0	2.15851e-05	107.4	1.87065e-09	2	842.49
GIDASDYQTVQIFYPSK	UniProtKB:P48147				2.75427e+07	0	2.20415e-05	107.4	8.2578e-09	2	966.469
AAELIANSLATAGDGLIELR	UniProtKB:P35232				6.61561e+08	0	2.66948e-06	107.4	3.45015e-09	2	999.548
ILLDDTGLAYIcQTYER	UniProtKB:Q92600	C12(Carbamidomethyl)			0	0	5.7592e-06	107.4	8.21686e-09	2	1022.5
VFDFELSSQDMTTLLSYNR	UniProtKB:P15121				0	0	3.78952e-06	107.38	9.48784e-09	2	1133.54
AINcATSGVVGLVNcLR	UniProtKB:P49327	C4(Carbamidomethyl); C15(Carbamidomethyl)			769853085	0	2.96042e-07	107.36	4.76857e-09	2	902.482
IINEPTAAAIAYGLDK	UniProtKB:P11021;UniProtKB:P34931;UniProtKB:P54652;UniProtKB:P11142				8633836273	0	2.83652e-05	107.35	4.19972e-09	2	830.453
eEEIAALVIDNGSGMcK	UniProtKB:P63261	N-Term(Acetyl); C16(Carbamidomethyl)			2.28089e+10	0	1.42818e-06	107.33	8.67215e-09	2	939.445
LDNNLDSVSLLIDHVcSR	UniProtKB:Q9H7D7	C16(Carbamidomethyl)			392299616	0	3.108e-09	107.29	7.06425e-09	3	690.685
SYELPDGQVITIGNER	UniProtKB:CON_P60712;UniProtKB:P62736;UniProtKB:P68032;UniProtKB:P63261;UniProtKB:P63267;UniProtKB:P68133;UniProtKB:Q6S8J3;UniProtKB:A5A3E0;UniProtKB:Q562R1;UniProtKB:Q9BYX7				48826612885	0	3.88117e-06	107.25	7.11925e-09	2	895.954
NPSIVGVLcTDSQGLNLGcR	UniProtKB:O43504	C9(Carbamidomethyl); C19(Carbamidomethyl)			273487974	0	7.34521e-10	107.25	8.78534e-09	2	1080.53
SVIEQGGIQTVDQLIK	UniProtKB:Q8WUM4				2.44055e+08	0	7.51167e-07	107.23	2.21404e-09	2	864.494
VVVAENFDEIVNNENK	UniProtKB:P30101				1329646951	0	1.94104e-07	107.22	7.53561e-09	2	916.958
sGEDEQQEQTIAEDLVVTK	UniProtKB:Q9UQ80	N-Term(Acetyl)			7.51821e+08	0	1.05261e-07	107.22	9.74053e-09	2	1081.01
GNFTLPEVAEcFDEITYVELQK	UniProtKB:Q00839	C11(Carbamidomethyl)			508797940	0	6.68814e-08	107.22	1.00193e-08	2	1301.63
WSTISENLFATTGYPGK	UniProtKB:Q8NFH4				19299984	0	7.92645e-07	107.21	7.91704e-09	2	936.464
aTQVEPLLPGGATLLQAEEHGGLVR	UniProtKB:Q6PKG0	N-Term(Acetyl)			244955718	0	5.00727e-09	107.19	3.57334e-09	2	1299.7
SAGVQcFGPTAEAAQLESSK	UniProtKB:P22102	C6(Carbamidomethyl)			6.96915e+08	0	5.71788e-07	107.18	9.30137e-09	2	1019.48
LVTSPccIVTSTYGWTANMER	UniProtKB:P07900	C6(Carbamidomethyl); C7(Carbamidomethyl)			1050098036	0	2.26988e-09	107.18	1.06873e-08	2	1223.57
SPPYTAFLGNLPYDVTEESIK	UniProtKB:P23588				229868884	0	8.7519e-12	107.13	8.30338e-09	2	1171.09
LSVEESEAAGDGVDTK	UniProtKB:P49321				264138863	0	3.54401e-06	107.11	7.86898e-09	2	803.878
NKEDQYDHLDAADMTK	UniProtKB:P34932				5.561e+08	0	6.2543e-07	107.11	9.1928e-09	2	947.422
FFQSFSDALIDEDPQAALEELTK	UniProtKB:Q9Y2Z0				1.68762e+08	0	3.9458e-07	107.11	9.69665e-09	2	1307.64
ALTDAGcNLNPLQYIK	UniProtKB:Q8WVM8	C7(Carbamidomethyl)			72117476	0	2.64291e-07	107.05	7.08198e-09	2	895.959
ERFDPTQFQDcIIQGLTETGTDLEAVAK	UniProtKB:Q7L1Q6	C11(Carbamidomethyl)			4.32621e+08	0	1.43071e-10	107.02	9.18569e-09	3	1061.53
SGQSALYDALFSSQSPK	UniProtKB:P49792;UniProtKB:A6NKT7;UniProtKB:Q7Z3J3				133999700	0	2.68737e-05	107	8.26637e-09	2	893.438
LLVDVDESTLSPEEQK	UniProtKB:O75533				320062590	0	2.71902e-05	106.98	7.70118e-09	2	901.457
AIEQADLLQEEAETPR	UniProtKB:P56377				53905739	0	2.4011e-07	106.98	7.83448e-09	2	906.958
FQMTQEVVcDEcPNVK	UniProtKB:Q9UBS4	C9(Carbamidomethyl); C12(Carbamidomethyl)			1.05005e+08	0	5.48469e-06	106.98	9.52525e-09	2	992.439
RTMmAcGGSIQTSVNALSADVLGR	UniProtKB:Q99832	M4(Oxidation); C6(Carbamidomethyl)			116366524	0	2.64995e-08	106.9	1.03179e-08	3	837.742
DAELAGSPELLEFLGTR	UniProtKB:Q53T59				151739743	0	1.58326e-05	106.89	6.64685e-09	2	909.472
WSQEDMLTLLEcMK	UniProtKB:P17480	C12(Carbamidomethyl)			2.59773e+07	0	2.14552e-05	106.88	8.91743e-09	2	892.404
QAGAEALSQAVAR	UniProtKB:Q92616				115957719	0	5.29773e-05	106.87	5.21888e-09	2	636.344
PGGLLLGDVAPNFEANTTVGR	UniProtKB:P30041				3698600430	0	1.64506e-09	106.85	6.01232e-09	2	1049.55
DVVENGETADQTLSLMEQLR	UniProtKB:P47897				5.18376e+07	0	9.95934e-06	106.83	9.38795e-09	2	1124.56
EAGVEMGDEDDLSTPNEK	UniProtKB:P14868				222039711	0	1.83497e-08	106.81	8.56413e-09	2	968.406
AQEAcGPLEMDSALSVVQNLEK	UniProtKB:Q9Y490	C5(Carbamidomethyl)			162153354	0	5.94987e-08	106.8	1.12529e-08	2	1195.07
LALSQNQQSSGAAGPTGK	UniProtKB:O95232				2.17829e+08	0	8.43436e-08	106.79	7.4341e-09	2	857.939
mEATLEQHLEDTMK	UniProtKB:O43504	N-Term(Acetyl)			885144966	0	8.74843e-07	106.79	9.0518e-09	2	859.39
NDSLAGVVIADNEYPSR	UniProtKB:O15498				3.30766e+07	0	5.37143e-05	106.79	9.43188e-09	2	910.441
SSLGQSASETEEDTVSVSKK	UniProtKB:Q13435				119938724	0	2.62352e-09	106.77	1.0075e-08	3	690.335
MASTFIGNSTAIQELFK	UniProtKB:Q9BUF5				4037510376	0	1.42611e-05	106.74	7.29246e-09	2	929.479
HQSFVLVGETGSGK	UniProtKB:O43143				64737785	0	1.82816e-06	106.71	6.65297e-09	2	723.378
cSASccEDSQASMK	UniProtKB:Q96C01	C1(Carbamidomethyl); C5(Carbamidomethyl); C6(Carbamidomethyl)			1.17443e+08	0	2.44137e-06	106.7	3.7425e-09	2	810.794
VNIAFNYDMPEDSDTYLHR	UniProtKB:Q13838				3717046492	0	6.46556e-09	106.69	1.19348e-08	2	1150.52
GMGTVEGGDQSNPK	UniProtKB:Q13428				141210264	0	3.30916e-05	106.66	7.36654e-09	2	688.809
TDASSASSFLDSDELER	UniProtKB:Q14498				498080290	0	6.79253e-07	106.6	9.98823e-09	2	915.405
AQFAQPEILIGTIPGAGGTQR	UniProtKB:P30084				160387409	0	7.7901e-06	106.58	4.58693e-09	2	1063.08
LVSPGSANETSSILVESVTR	UniProtKB:O75369				8.98769e+07	0	2.40722e-08	106.55	6.2188e-09	2	1023.54
KLPIDVTEGEVISLGLPFGK	UniProtKB:P26599				242833536	0	2.26933e-10	106.54	2.0119e-09	2	1056.61
LDAITDEENDMLDLAYGLTDR	UniProtKB:P10109				2.28418e+07	0	6.72054e-09	106.54	1.23676e-08	2	1192.06
YQGDGIVEDEEETMENNEEK	UniProtKB:Q9NYF8				143550788	0	1.36425e-07	106.43	1.03631e-08	2	1179.48
LGAVDESLSEETQK	UniProtKB:Q96HE7				182935654	0	8.15857e-06	106.42	8.53418e-09	2	753.372
ANLQIDQINTDLNLER	UniProtKB:P35579				5.49112e+08	0	6.64887e-07	106.38	6.0643e-09	2	935.498
FTAVEDQYYcVDcYK	UniProtKB:Q13642	C10(Carbamidomethyl); C13(Carbamidomethyl)			392115958	0	1.50211e-06	106.37	9.79099e-09	2	980.91
AVVYSNTIQSIMAIVK	UniProtKB:P04899				0	0	3.30517e-06	106.32	2.94599e-09	2	868.995
MNFGDFLTVMTQK	UniProtKB:P41208				1.17376e+08	0	5.37143e-05	106.29	9.16357e-09	2	766.373
GLcESVVEADLVEALEK	UniProtKB:Q8WVV9	C3(Carbamidomethyl)			237214329	0	1.1045e-07	106.26	9.61865e-09	2	930.967
TSVQTEDDQLIAGQSAR	UniProtKB:P35221;UniProtKB:P26232				3.48407e+07	0	5.0851e-07	106.25	1.01827e-08	2	909.947
FNDSEGDDTEETEDYR	UniProtKB:Q9NYF8				6.96686e+06	0	2.68764e-07	106.24	6.25347e-09	2	961.364
VDLTLDWLTETSEEAK	UniProtKB:P49321				9.17731e+07	0	3.69036e-07	106.22	9.81271e-09	2	925.46
DYPVVSIEDPFDQDDWGAWQK	UniProtKB:P06733				4707002848	0	1.76403e-08	106.22	1.42254e-08	2	1255.57
sAIQNLHSFDPFADASK	UniProtKB:P41567	N-Term(Acetyl)			633892560	0	2.34278e-08	106.2	1.09435e-08	2	945.454
VSTALScLLGLPLR	UniProtKB:O00442	C7(Carbamidomethyl)			328780856	0	4.69836e-05	106.15	2.39749e-09	2	750.442
NETLGGTcLNVGcIPSK	UniProtKB:P09622	C8(Carbamidomethyl); C13(Carbamidomethyl)			383026512	0	3.52767e-05	106.1	1.10069e-08	2	910.443
SINPDEAVAYGAAVQAAILmGDK	UniProtKB:P34931;UniProtKB:P08107	M20(Oxidation)			218138190	0	1.18268e-08	106.1	1.09566e-08	2	1160.58
AIVAIENPADVSVISSR	UniProtKB:P08865				5731223916	0	2.86575e-05	106.09	4.40898e-09	3	580.992
LDGLVETPTGYIESLPR	UniProtKB:P55209				3269254265	0	5.37143e-05	105.99	7.2207e-09	2	930.492
DSLVQScPGSLSLcAGVK	UniProtKB:Q9UQ35	C7(Carbamidomethyl); C14(Carbamidomethyl)			231073401	0	4.86593e-07	105.99	1.10123e-08	2	939.461
VYAAATEDMDcLTFGSPVLMR	UniProtKB:P39748	C11(Carbamidomethyl)			17961866	0	8.11498e-11	105.95	1.40414e-08	2	1174.04
QDMEQAMTSSEMANSLGLPALK	UniProtKB:P40616				3.83941e+07	0	2.68945e-09	105.94	1.46532e-08	2	1176.54
IADFGLSNMMSDGEFLR	UniProtKB:P54646;UniProtKB:Q13131				86071404	0	4.59219e-08	105.84	1.26711e-08	2	951.941
LcDFGVSGQLIDSMANSFVGTR	UniProtKB:P36507;UniProtKB:Q02750	C2(Carbamidomethyl)			1.71676e+08	0	4.66178e-08	105.81	1.36801e-08	2	1187.57
DTMSDQALEALSASLGTR	UniProtKB:P20810				247396013	0	4.03798e-07	105.76	1.20718e-08	2	933.447
GPVSGTEPEPVYSMEAADYR	UniProtKB:Q14247				72323585	0	4.4981e-09	105.76	1.35212e-08	2	1077.99
SPAEScDLLGDIQTcIR	UniProtKB:Q9BQG0	C6(Carbamidomethyl); C15(Carbamidomethyl)			95365932	0	5.00304e-09	105.7	1.33689e-08	2	967.946
VNNSTMLGASGDYADFQYLK	UniProtKB:P28070				1.85069e+08	0	5.34211e-06	105.7	1.41588e-08	2	1097.52
GPcVSENEIGTGGTcQWK	UniProtKB:Q15436	C3(Carbamidomethyl); C15(Carbamidomethyl)			7.18387e+07	0	1.5336e-07	105.69	1.2968e-08	2	990.442
MSATFIGNSTAIQELFK	UniProtKB:Q13885;UniProtKB:Q9BVA1;UniProtKB:P68371				3212470438	0	7.03511e-07	105.66	8.99685e-09	2	929.482
LEGLGSSEADQDGLASTVR	UniProtKB:Q07065				40765354	0	2.18176e-06	105.66	1.24698e-08	2	952.961
WMDEAQALDTADR	UniProtKB:Q9BXJ9				110594238	0	3.55152e-05	105.65	9.20954e-09	2	761.331
SQNRPQGQSTQPSNAAGTNTTSASTPR	UniProtKB:Q9UHD9				4.32491e+07	0	4.53735e-09	105.56	1.54997e-08	3	915.438
QLQEFSTAIEEYNcALTEK	UniProtKB:O43264	C14(Carbamidomethyl)			1.27228e+07	0	1.78613e-07	105.55	1.50186e-08	2	1137.53
GDVVNQDDLYQALASGK	UniProtKB:Q9UBQ7				238962572	0	2.39458e-06	105.53	1.23393e-08	2	896.94
LPNFGFVVFDDSEPVQR	UniProtKB:Q9UN86				4.3233e+08	0	8.60554e-07	105.52	1.20984e-08	2	983.484
QDLPNAMNAAEITDK	UniProtKB:P61204;UniProtKB:P84077				2.54489e+09	0	1.65554e-05	105.49	1.21159e-08	2	815.893
IcPVETLVEEAIQcAEK	UniProtKB:P30084	C2(Carbamidomethyl); C14(Carbamidomethyl)			2.50124e+08	0	6.03182e-08	105.48	1.16653e-08	2	994.998
LVEYDIDEVVYDEDSPYQNIK	UniProtKB:P52788				123735757	0	1.57993e-08	105.45	1.61981e-08	2	1273.6
EQLAQAMFDHIPVGVGSK	UniProtKB:Q9Y3I0				932288100	0	9.30568e-08	105.42	9.56544e-09	2	964.001
FQIYFDNcPLLTIPGR	UniProtKB:O43143	C8(Carbamidomethyl)			300762556	0	2.07602e-05	105.42	1.07468e-08	2	977.497
SVDETTQAMAFDGIIFQGQSLK	UniProtKB:P26368				5.4173e+08	0	6.75729e-07	105.39	1.30008e-08	2	1193.59
SVGGSGGGSFGDNLVTR	UniProtKB:P02545				75809600	0	1.9973e-06	105.3	1.16469e-08	2	783.884
LVSSPccIVTSTYGWTANMER	UniProtKB:P08238	C6(Carbamidomethyl); C7(Carbamidomethyl)			1471988808	0	7.40974e-09	105.29	1.75173e-08	2	1216.56
EGcEAIVDTGTSLMVGPVDEVR	UniProtKB:P07339	C3(Carbamidomethyl)			22122197	0	3.69939e-07	105.26	1.66663e-08	2	1167.55
LVTDQNISENWR	UniProtKB:P24666				564721987	0	5.37143e-05	105.22	1.07618e-08	2	737.87
GLIAAIcAGPTALLAHEIGFGSK	UniProtKB:Q99497	C7(Carbamidomethyl)			4800767100	0	3.26548e-10	105.15	5.72034e-09	2	1134.12
NDGTVGDLAGLQNGSDLQFIEMQR	UniProtKB:Q9Y608				0	0	3.34737e-05	105.13	1.59436e-08	2	1289.62
MLGQMTDQVADLR	UniProtKB:P18206				2.06866e+08	0	1.92694e-05	105.09	1.16959e-08	2	739.36
cPSIAAAIAAVNALHGR	UniProtKB:Q14498	C1(Carbamidomethyl)			386788388	0	3.04004e-09	105.07	7.24874e-09	3	564.642
LGGLTQAPGNPVLAVQINQDK	UniProtKB:P26368				1229478344	0	1.585e-05	105.06	4.76878e-09	2	1067.09
IFSPNVVNLTLVDLPGMTK	UniProtKB:O00429				364202325	0	5.24177e-07	105.03	4.92903e-09	2	1029.57
TPSSDVLVFDYTK	UniProtKB:Q09028;UniProtKB:Q16576				3.72649e+09	0	9.55805e-06	104.99	1.12948e-08	2	736.372
LGNTISSLFGGGTTPDAK	UniProtKB:Q9Y4L1				1.99168e+08	0	1.66623e-06	104.96	9.20759e-09	2	868.46
SLVASLAEPDFVVTDFAK	UniProtKB:P22314				5359950982	0	5.21122e-08	104.95	9.16803e-09	2	955.003
LEFDLSPLNLDIGQVYK	UniProtKB:Q9NRN7				117122186	0	7.02242e-06	104.94	7.65817e-09	2	982.528
VVYGGGAAEIScALAVSQEADK	UniProtKB:P48643	C12(Carbamidomethyl)			5.58008e+08	0	5.26464e-11	104.94	1.45853e-08	2	1098.04
TcVTcEVSYcDEcLK	UniProtKB:O15344	C2(Carbamidomethyl); C5(Carbamidomethyl); C10(Carbamidomethyl); C13(Carbamidomethyl)			18285643	0	5.17822e-06	104.91	1.1834e-08	2	962.391
SILSSASATVATVGQGISNVIEK	UniProtKB:Q9NRY5				1.49081e+07	0	3.74296e-10	104.9	5.925e-09	2	1116.61
KAEEIANEMIEAAK	UniProtKB:P49588				386928840	0	2.09228e-08	104.85	1.13915e-08	2	773.895
aAAVLSGPSAGSAAGVPGGTGGLSAVSSGPR	UniProtKB:Q8IZL8	N-Term(Acetyl)			2.83467e+08	0	4.9276e-08	104.82	1.01058e-08	3	870.122
TPQGPPEIYSDTQFPSLQSTAK	UniProtKB:Q9UKY7				92302504	0	1.3893e-06	104.73	1.37919e-08	2	1196.6
EAVEQFESQGVDLSNIVK	UniProtKB:Q6NXE6				235496975	0	2.58051e-07	104.7	1.32539e-08	2	996.502
AIAELGIYPAVDPLDSTSR	UniProtKB:P06576				1503114053	0	4.26329e-05	104.67	9.60799e-09	2	994.526
LTAELIEQAAQYTNAVR	UniProtKB:P09661				341752860	0	4.11116e-08	104.6	9.40524e-09	2	946.003
AQAELENVSGALNEAESK	UniProtKB:Q7Z406				3.74395e+07	0	8.25337e-07	104.59	1.49753e-08	2	930.454
LVQIEYALAAVAGGAPSVGIK	UniProtKB:P25787				248505438	0	5.92452e-08	104.59	4.02621e-09	2	1014.07
TLVSTVGSMVFNEGEAQR	UniProtKB:Q9P2E9				36635247	0	8.40959e-07	104.54	1.50134e-08	2	962.975
TSSGLGGSTTDFLEEWK	UniProtKB:Q96IZ0				68863855	0	8.51438e-07	104.49	1.60816e-08	2	907.925
ALVLDcHYPEDEVGQEDEAESDIFSIR	UniProtKB:Q07021	C6(Carbamidomethyl)			4.29359e+08	0	6.3387e-08	104.47	2.36515e-08	3	1046.14
LPAVSSVAcGASVGYAVTK	UniProtKB:P18754	C9(Carbamidomethyl)			98289882	0	3.56939e-08	104.42	9.83758e-09	2	918.989
LSGEAFDWLLGEIESK	UniProtKB:P24928				1.97416e+07	0	8.4589e-07	104.41	1.11716e-08	2	897.47
ATQFTGATGAIMTTETTK	UniProtKB:Q14126				3.28818e+07	0	2.10238e-07	104.37	1.57005e-08	2	915.452
SSLQYSSPAPDGcGDQTLGDLLLTPTR	UniProtKB:P22102	C13(Carbamidomethyl)			448948920	0	8.32142e-06	104.34	1.77604e-08	2	1425.2
DETVSDcSPHIANIGR	UniProtKB:P47756	C7(Carbamidomethyl)			1.12189e+09	0	1.06364e-06	104.32	1.66645e-08	2	885.907
GFGTDEQAIVDVVANR	UniProtKB:P20073				2.21442e+08	0	7.24809e-07	104.31	1.45418e-08	2	845.923
GTEASSGTEAATGLEGEEK	UniProtKB:Q8IY81				187852989	0	7.03747e-06	104.23	1.72702e-08	2	912.413
WTNQLNSLNQAVVSK	UniProtKB:P61201				234668965	0	9.77343e-07	104.18	1.07231e-08	2	851.453
MGMGNNYSGGYGTPDGLGGYGR	UniProtKB:P31942				0	0	5.12877e-06	104.14	1.97269e-08	2	1090.97
IFVEFTSVFDcQK	UniProtKB:P26368	C11(Carbamidomethyl)			2.0836e+08	0	2.61391e-05	104.12	1.60789e-08	2	810.393
VLTGVAGEDAEcHAAK	UniProtKB:O95373	C12(Carbamidomethyl)			6.24127e+08	0	2.78018e-07	104.12	1.59085e-08	2	814.392
TGIEQGSDAGYLcESQK	UniProtKB:P40939	C13(Carbamidomethyl)			7.41662e+07	0	5.37143e-05	104.08	1.80432e-08	2	921.918
LLETIDQLYLEYAK	UniProtKB:P12814				866244900	0	2.04974e-05	104.04	8.58931e-09	2	856.468
NALNIGMVEEVLQSSDETK	UniProtKB:Q9NTX5				202778787	0	1.12491e-08	104.03	1.74713e-08	2	1039.01
FADDTYTESYISTIGVDFK	UniProtKB:P62820;UniProtKB:Q9H0U4				25281241	0	1.92068e-06	104.03	2.06599e-08	2	1086.51
DWEDDSDEDMSNFDR	UniProtKB:Q15185				7.82479e+07	0	8.64633e-06	104	8.2647e-09	2	938.339
IFTASNVSSVPLPAENVTITAGQR	UniProtKB:Q14157				42125093	0	3.77782e-10	103.93	8.753e-09	2	1236.67
mGGGGAMNMGDPYGSGGQK	UniProtKB:P23246	M1(Oxidation)			1.82188e+08	0	1.11263e-08	103.84	1.35211e-08	2	894.361
VTELESLLEETQAIcR	UniProtKB:Q6P2H3	C15(Carbamidomethyl)			57079208	0	2.52588e-06	103.81	1.48438e-08	2	945.985
LTQAQIFDYGEIPNFPR	UniProtKB:P00491				7.58222e+08	0	1.53079e-07	103.78	1.52985e-08	2	1005.01
LAALASDFSEDMLQEK	UniProtKB:Q8WUM0				145855444	0	1.13089e-06	103.76	1.79103e-08	2	884.431
LLQFQDLTGIESMDQcR	UniProtKB:Q96CS3	C16(Carbamidomethyl)			73240064	0	1.91389e-07	103.76	2.00771e-08	2	1027.49
aAAAQLSLTQLSSGNPVYEK	UniProtKB:P42566	N-Term(Acetyl)			0	0	8.92501e-07	103.75	1.57208e-08	2	1045.53
GLIEIISNAAEYENIPIR	UniProtKB:O75643				471596140	0	5.95478e-06	103.74	8.49353e-09	2	1008.05
VGQLSEGAIAAIMQK	UniProtKB:P27694				506009702	0	1.25704e-05	103.66	9.69761e-09	2	758.416
mNAGSDPVVIVSAAR	UniProtKB:Q9BWD1	N-Term(Acetyl)			3.50205e+08	0	1.54594e-05	103.66	1.37704e-08	2	764.896
VFSDEVQQQAQLSTIR	UniProtKB:Q9Y262				180260386	0	2.87882e-07	103.65	1.37266e-08	2	924.981
AEDNADTLALVFEAPNQEK	UniProtKB:P12004				1909130140	0	4.81128e-07	103.64	2.03909e-08	2	1038
GMGMNSPELLLLVENcPK	UniProtKB:Q92797	C16(Carbamidomethyl)			8.37204e+07	0	3.58759e-06	103.63	1.83288e-08	2	1001.5
EYFGAFGEIENIELPMDTK	UniProtKB:O14979				658918840	0	9.99817e-10	103.62	2.14214e-08	2	1102.03
AAFDDAIAELDTLSEESYK	UniProtKB:P62258				27007964222	0	8.62673e-08	103.61	2.16188e-08	2	1044.49
EVLLLMQALNTLSTPEEK	UniProtKB:Q9NUQ3;UniProtKB:Q9BZA5				114426979	0	1.78434e-06	103.59	6.41626e-09	2	1015.07
LIDLNNGEGQIFTIDGPLcLK	UniProtKB:Q96SY0	C19(Carbamidomethyl)			32838511	0	7.73324e-08	103.57	1.35159e-08	2	1165.61
VDIQTEDLEDGTcK	UniProtKB:O75369	C13(Carbamidomethyl)			140685144	0	6.11261e-06	103.54	1.77876e-08	2	811.867
SVMDATQIAGLNcLR	UniProtKB:P34932	C13(Carbamidomethyl)			1.28927e+09	0	1.95979e-05	103.54	1.74446e-08	2	824.911
LLQTDDEEEAGLLELLK	UniProtKB:P55060				3166488338	0	3.88132e-08	103.52	1.20895e-08	2	965.012
LAGVTALScWLPLR	UniProtKB:O75608	C9(Carbamidomethyl)			245448020	0	1.64137e-05	103.51	8.03295e-09	2	778.938
LQQQQQQQQLAQMK	UniProtKB:Q6Y7W6				5.26277e+07	0	1.38062e-05	103.49	1.43559e-08	2	864.449
DQLSVLENGVDIVVGTPGR	UniProtKB:Q92499				0	0	3.67931e-07	103.45	1.15788e-08	2	984.526
LEVEANNAFDQYR	UniProtKB:P47756				189968522	0	5.37143e-05	103.44	1.79551e-08	2	784.876
VGIGAFPTEQDNEIGELLQTR	UniProtKB:P30520				726092500	0	1.91943e-07	103.43	1.65212e-08	2	1144.09
MNLTQLYGSNTAGYIVcR	UniProtKB:Q12769	C17(Carbamidomethyl)			3.50169e+06	0	3.47923e-06	103.39	2.15006e-08	2	1031
LERENAEVDGDDDAEEMEAK	UniProtKB:P05198				1.43259e+08	0	2.80272e-07	103.37	2.36227e-08	3	755.656
QIVWNGPVGVFEWEAFAR	UniProtKB:P00558				9.7698e+06	0	4.77099e-08	103.3	1.37795e-08	2	1053.05
AYHEQLSVAEITNAcFEPANQMVK	Ensembl:CON_ENSBTAP00000016242;UniProtKB:Q71U36;UniProtKB:P68363;UniProtKB:Q13748;UniProtKB:Q6PEY2;UniProtKB:P68366	C15(Carbamidomethyl)			3814592119	0	8.51203e-11	103.27	2.60686e-08	2	1375.66
MSNWQGAIDScLEALELDPSNTK	UniProtKB:Q08752	C11(Carbamidomethyl)			58083210	0	1.09701e-09	103.25	2.74167e-08	2	1290.1
TVLQIDDNVTSAVEGINR	UniProtKB:Q15785				1.18525e+08	0	2.92707e-07	103.24	1.42984e-08	2	972.511
IDIDNSGYVSDYELQDLFK	UniProtKB:Q14651				36093817	0	8.12245e-08	103.22	2.44457e-08	2	1117.54
AWDQEAEGAGPELGLR	UniProtKB:Q8IZ83				35992355	0	2.99916e-05	103.2	2.0069e-08	2	849.911
LHDINAQLVEDQGFLDTLK	UniProtKB:Q10567				751102860	0	3.57822e-11	103.08	1.51155e-08	2	1085.07
IEGcIIGFDEYMNLVLDDAEEIHSK	UniProtKB:P62304	C4(Carbamidomethyl)			3.57097e+08	0	4.48878e-12	103.08	2.73992e-08	3	970.8
DLLVQTLENSGVLNR	UniProtKB:O95684				73621075	0	2.22916e-05	103.04	8.7723e-09	2	835.966
LAcLSEEGNEIESGK	UniProtKB:Q9Y2L1	C3(Carbamidomethyl)			125556921	0	6.28111e-07	103.01	2.08339e-08	2	818.383
DADAGDEDEESEEPR	UniProtKB:Q9NZT2				43424485	0	2.70162e-06	102.98	1.20488e-08	2	832.318
NQIIAcNGSIQSIPEIPDDLK	UniProtKB:P23921	C6(Carbamidomethyl)			108177284	0	1.94809e-09	102.98	2.01954e-08	2	1163.09
AAPTAASDQPDSAATTEK	UniProtKB:Q9BRP8				115304807	0	4.64526e-08	102.94	2.22421e-08	2	866.405
LVSGGGAcSDTGAcTPAR	UniProtKB:Q9UJC3	C8(Carbamidomethyl); C14(Carbamidomethyl)			7.55089e+07	0	4.86838e-07	102.91	2.25703e-08	2	868.892
QFIDSNPNQPLVILEMESGASAK	UniProtKB:P49588				22523411	0	5.37453e-09	102.9	2.01785e-08	2	1244.63
NPDSITNQIALLEAR	UniProtKB:Q9NTJ3				46134744	0	2.03394e-05	102.89	1.32058e-08	2	827.944
LIALSIDSVEDHLAWSK	UniProtKB:P30041				2488462586	0	5.25398e-08	102.88	1.26746e-08	2	949.009
VTVGDITcTGEGTSK	UniProtKB:O75569	C8(Carbamidomethyl)			78845521	0	4.04532e-06	102.83	2.0324e-08	2	762.866
TIAEcLADELINAAK	UniProtKB:P46782	C5(Carbamidomethyl)			6895545886	0	5.32954e-06	102.81	1.76165e-08	2	816.423
LPSSVFASEFEEDVGLLNK	UniProtKB:Q96GA3				71600941	0	4.467e-11	102.79	1.72402e-08	2	1041.04
LGSTVFVANLDYK	UniProtKB:P52272				1075579650	0	5.37143e-05	102.78	1.32625e-08	2	713.884
VQIAVANAQELLQR	UniProtKB:Q9Y5L4				1560115000	0	1.9508e-05	102.75	6.34672e-09	2	776.946
DQMQQQLNDYEQLLDVK	UniProtKB:P20700				1020405816	0	2.81942e-07	102.75	2.56868e-08	2	1054.51
DAGEGGLSLAIEGPSK	UniProtKB:P21333				282623665	0	7.34452e-06	102.72	1.78919e-08	2	750.888
GLAFIQDPDGYWIEILNPNK	UniProtKB:Q04760				1.21073e+09	0	1.27357e-08	102.72	1.58953e-08	2	1152.1
GPPIEDAIASSDVLETASK	UniProtKB:Q9Y450				72074971	0	4.92353e-08	102.64	1.98036e-08	2	950.484
VLLESEQFLTELTR	UniProtKB:P37108				4698001924	0	5.37143e-05	102.55	1.15434e-08	2	839.46
TAFDEAIAELDTLNEESYK	UniProtKB:P31946				5290071325	0	4.4842e-09	102.5	2.9059e-08	2	1080.02
DGDVTVTNDGATILSMMDVDHQIAK	UniProtKB:P48643				80121132	0	3.03882e-09	102.48	3.0597e-08	2	1323.64
EIVLADVIDNDSWR	UniProtKB:P22234				1.92739e+09	0	2.51299e-05	102.47	2.1217e-08	2	822.916
QLGQDLLNSYIENEGK	UniProtKB:O95757				296002880	0	2.4535e-06	102.45	2.33343e-08	2	910.957
LYLEDDDPVQAEAYINR	UniProtKB:Q9BT78				137554636	0	3.64398e-07	102.45	2.75524e-08	2	1012.48
TLNEWSSQINPDLVR	UniProtKB:P48507				107106324	0	2.35848e-06	102.37	2.14852e-08	2	886.451
LPPNTNDEVDEDPTGNK	UniProtKB:Q15393				7.78364e+07	0	1.12618e-07	102.33	2.7722e-08	2	927.924
VPSTETEALASNLMGMFEK	UniProtKB:P31150				262091501	0	1.528e-09	102.32	2.67015e-08	2	1028
NcTVYcGGIASGLTDQLMR	UniProtKB:Q01085	C2(Carbamidomethyl); C6(Carbamidomethyl)			9.89066e+07	0	9.80577e-08	102.31	2.99238e-08	2	1058.5
TTPYQIAcGISQGLADNTVIAK	UniProtKB:P26639	C8(Carbamidomethyl)			283285594	0	9.97697e-09	102.28	2.06337e-08	2	1161.1
cSAIWSEDGcIYPATIASIDFK	UniProtKB:Q16637	C1(Carbamidomethyl); C10(Carbamidomethyl)			3.30312e+07	0	5.4485e-06	102.28	3.45531e-08	2	1252.58
LNPVTTDEDLEIIFSR	UniProtKB:Q8WUA2				98044761	0	9.98009e-06	102.26	1.79922e-08	2	931.489
LTLYDIAHTPGVAADLSHIETK	UniProtKB:P40926				7.95464e+09	0	1.23845e-11	102.24	1.40542e-08	3	789.09
AEEAQKTESVDNEGE	UniProtKB:Q15651				54939555	0	2.83759e-05	102.21	2.21803e-08	2	818.356
QIANSQDGYVWQVTDMNR	UniProtKB:P10155				4.07721e+07	0	3.48343e-06	102.2	3.08902e-08	2	1062.99
sGALDVLQmKEEDVLK	UniProtKB:P08865	N-Term(Acetyl); M9(Oxidation)			6.34697e+08	0	5.20753e-06	102.19	1.98427e-08	2	916.975
VVDYSQFQEsDDADEDYGR	UniProtKB:Q9H1E3	S10(Phospho)	1	Y(4): 0.0; S(5): 0.0; S(10): 100.0; Y(17): 0.0	416490800	0	6.58936e-06	102.18	1.98249e-08	2	1159.44
GGGGGGPGEGFDVAK	UniProtKB:Q9Y295				1.90572e+08	0	5.37143e-05	102.16	2.01566e-08	2	631.296
ETcVSGEDPTQGADLSPDEK	UniProtKB:Q02952	C3(Carbamidomethyl)			5.52176e+07	0	2.48283e-05	102.15	2.90993e-08	2	1067.96
GLAEVQQDGEAEEGATSDGEK	UniProtKB:Q02952				28601471	0	1.2381e-07	102.14	3.02264e-08	2	1060.47
KINEELESQYQQSMDSK	UniProtKB:O00193				7.04822e+08	0	1.77541e-08	102.11	3.10511e-08	2	1028.98
FDTGNLcmVTGGANLGR	UniProtKB:P62701	C7(Carbamidomethyl); M8(Oxidation)			389112289	0	4.37543e-07	102.08	2.87235e-08	2	899.915
KLGGSLADSYLDEGFLLDK	UniProtKB:P78371				1040842240	0	1.40885e-10	102.06	1.97363e-08	2	1021.03
QDLMNIAGTTLSSK	UniProtKB:P78371				365759944	0	4.17901e-05	102.03	1.98073e-08	2	739.882
TVYGGGcSEMLMAHAVTQLANR	UniProtKB:P78371	C7(Carbamidomethyl)			2375253600	0	6.93483e-08	102.02	3.45149e-08	2	1183.55
SEQDQAENEGEDSAVLmER	UniProtKB:Q99613	M17(Oxidation)			5.02183e+06	0	4.94607e-05	102.01	2.85103e-08	2	1076.95
LNDYLQIETIQALEELAAK	UniProtKB:Q9C0B1				1.45124e+08	0	2.62802e-07	101.96	1.27391e-08	2	1088.09
VIVVGNPANTNcLTASK	UniProtKB:P40925	C12(Carbamidomethyl)			1.9333e+09	0	7.81492e-07	101.95	1.77756e-08	2	879.468
EAAGTTAAAGTGGATEQPPR	UniProtKB:O43290				5.82323e+07	0	1.06154e-05	101.85	2.86463e-08	2	907.44
TMLELLNQLDGFDSR	UniProtKB:P62191				230953380	0	2.04652e-06	101.82	2.44123e-08	2	876.447
cLDENLEDASQcK	UniProtKB:Q5JTJ3	C1(Carbamidomethyl); C12(Carbamidomethyl)			140478008	0	1.6602e-05	101.81	2.18121e-08	2	791.332
ISVATGALEAAQGSK	UniProtKB:P51610				1.55145e+08	0	2.09248e-05	101.79	1.52674e-08	2	701.885
MLDAEDIVNTARPDEK	UniProtKB:O43707				6.26214e+08	0	8.78125e-07	101.79	2.89157e-08	2	908.947
aGRLPAcVVDcGTGYTK	UniProtKB:P61158	N-Term(Acetyl); C7(Carbamidomethyl); C11(Carbamidomethyl)			6.59812e+08	0	3.77141e-06	101.78	3.09935e-08	2	933.948
QLIYNYPEQLFGAAGVMAIEHADFAGVER	UniProtKB:P78371				29990368	0	3.81964e-11	101.72	3.0819e-08	3	1070.54
SVNEVMEWMNNVMNAQAK	UniProtKB:Q92598				4.65087e+08	0	8.04843e-06	101.71	3.43537e-08	2	1047.99
DYLDFLDDEEDQGIYQSK	UniProtKB:P25205				120598430	0	9.01196e-08	101.67	3.34462e-08	2	1096.98
MVAAATNNLcEAANAAVQGHASQEK	UniProtKB:Q9Y490	C10(Carbamidomethyl)			3.10101e+08	0	1.52647e-09	101.66	3.73137e-08	3	852.744
ISSLLEEQFQQGK	UniProtKB:P62241				4956240821	0	4.36147e-05	101.65	1.97548e-08	2	753.897
DNLTLWTSDTQGDEAEAGEGGEN	UniProtKB:P63104				654247564	0	1.51412e-07	101.64	3.48742e-08	2	1205
SDLEMQYETLQEELMALK	UniProtKB:CON_P35527;UniProtKB:P35527				0	0	2.95205e-07	101.61	3.52713e-08	2	1086.02
TFIAVPASNSGLcIVNDELFVR	UniProtKB:Q9UBU9	C13(Carbamidomethyl)			8.92648e+07	0	3.00843e-06	101.57	2.20099e-08	2	1211.63
DASDDLDDLNFFNQK	UniProtKB:A6NK07;UniProtKB:P20042				189021920	0	6.84505e-06	101.56	3.0024e-08	2	878.887
aLDGPEQMELEEGK	UniProtKB:P62195	N-Term(Acetyl)			2.72406e+08	0	3.69289e-05	101.54	2.81599e-08	2	794.365
VDVGGSEPASLSYLSFEGATK	UniProtKB:Q9NQT5				4.26195e+07	0	1.58699e-07	101.54	3.19864e-08	2	1057.52
LDNLVAILDINR	UniProtKB:P29401				1.89172e+09	0	4.04269e-05	101.51	8.02024e-09	2	684.9
IEEVSDTSSLQPQASLK	UniProtKB:Q9H6T3				8.42419e+07	0	8.76535e-06	101.49	2.48104e-08	2	916.471
YIAIASTTVETTDPEK	UniProtKB:P31150				243737433	0	1.78606e-05	101.46	2.53861e-08	2	869.946
QQSAQSQVSTTAENK	UniProtKB:Q9H0A0				5.52736e+07	0	5.0045e-06	101.43	2.926e-08	2	803.889
aTPLAVNSAASLWGPYK	UniProtKB:Q92621	N-Term(Acetyl)			92635827	0	4.00351e-06	101.43	1.80654e-08	2	894.482
VINDGLFYYEQDLWAEK	UniProtKB:Q6PKG0				5.29518e+07	0	4.56738e-07	101.4	3.2002e-08	2	1052.02
MSVQPTVSLGGFEITPPVVLR	UniProtKB:P06748				37376257152	0	1.92111e-06	101.39	1.13781e-08	2	1114.12
AEGDSAGTAGTPGGTPAGDK	UniProtKB:Q92925				36179596	0	1.15015e-07	101.35	3.09838e-08	2	858.888
IEELDQENEAALENGIK	UniProtKB:P43243				7.84764e+06	0	2.44902e-06	101.33	3.32729e-08	2	957.964
SLEGADLPNLLFYGPPGTGK	UniProtKB:P35249				135205932	0	5.21407e-07	101.3	2.33068e-08	2	1023.54
VLGPYTFSIcDTSNFSDYIR	UniProtKB:P22314	C10(Carbamidomethyl)			2.0972e+07	0	9.92873e-08	101.3	4.24437e-08	2	1178.04
LYNNITFEELGALLEIPAAK	UniProtKB:Q9BT78				47385532	0	5.37307e-08	101.29	1.20741e-08	2	1110.11
GPAVGIDLGTTYScVGVFQHGK	UniProtKB:P11142	C14(Carbamidomethyl)			3.32692e+08	0	1.58402e-09	101.25	3.18405e-08	2	1132.07
ILDQGEDFPASEMTR	UniProtKB:P30040				212743456	0	2.15512e-05	101.23	3.32795e-08	2	854.899
EcSAGLDSNEMSLQEK	UniProtKB:Q7Z4Q2	C2(Carbamidomethyl)			4.73536e+07	0	7.9294e-06	101.22	3.04755e-08	2	899.389
YSEVFEAINITNNEK	UniProtKB:P68400				129686082	0	1.41802e-05	101.21	3.16243e-08	2	885.935
GILSGTSDLLLTFDEAEVR	UniProtKB:P18206				60003299	0	1.4928e-07	101.21	2.40559e-08	2	1018.53
LcNNQEENDAVSSAK	UniProtKB:Q49AR2	C2(Carbamidomethyl)			2.20988e+07	0	1.20205e-06	101.12	3.08377e-08	2	839.869
GNAGQSNYGFANSAMER	UniProtKB:P49327				267893464	0	4.19222e-06	101.08	3.21446e-08	2	887.387
AEGSDVANAVLDGADcImLSGETAK	UniProtKB:P14618	C16(Carbamidomethyl); M18(Oxidation)			3.76752e+07	0	1.19184e-09	101.07	4.62137e-08	2	1255.57
IDQLEGDHQLIQEALIFDNK	UniProtKB:P12814				825726136	0	2.55544e-09	101.05	2.82528e-08	2	1170.1
VDSAATSGYEIGNPPDYR	UniProtKB:P24666				1.66729e+08	0	3.51412e-08	101.03	3.76444e-08	2	956.441
EVYEGEVTELTPcETENPMGGYGK	UniProtKB:Q9Y265	C13(Carbamidomethyl)			3.19318e+08	0	4.31702e-06	101	4.78503e-08	2	1345.09
MYTDIQEPMLSAAQEQFGGNPFASLVSNTSSGEGSQPSR	UniProtKB:Q9UMX0				1.5821e+07	0	1.91893e-06	100.97	5.21452e-08	3	1373.64
LVAIVDVIDQNR	UniProtKB:P50914				2120728319	0	5.37143e-05	100.96	1.03016e-08	2	677.893
GNYSTDQLcVLDNVK	UniProtKB:Q7Z4Q2	C9(Carbamidomethyl)			9.49898e+07	0	5.37143e-05	100.94	3.45387e-08	2	863.411
DWEDDsDEDMSNFDR	UniProtKB:Q15185	S6(Phospho)	1	S(6): 100.0; S(11): 0.0	3.26775e+08	0	3.67259e-05	100.93	9.6626e-09	2	978.322
YTPSGQAGAAASESLFVSNHAY	UniProtKB:P04075				5.86442e+08	0	7.27503e-08	100.9	4.41936e-08	2	1114.51
TSFEDGSGEcEVFcK	UniProtKB:O95757	C10(Carbamidomethyl); C14(Carbamidomethyl)			206880341	0	2.65745e-06	100.89	2.46978e-08	2	876.35
EGNDLYHEMIESGVINLK	UniProtKB:P06576				2.62747e+08	0	2.18901e-07	100.89	3.75375e-08	2	1031
TVPVPDTGDSVELFIFDSAGK	UniProtKB:Q9BW83				85103690	0	1.55349e-07	100.84	3.40493e-08	2	1097.55
VVSQYSSLLSPMSVNAVMK	UniProtKB:P50991				839711282	0	1.60878e-08	100.81	2.61693e-08	2	1020.53
FEIGEGENLDLPYGLER	UniProtKB:Q02790				2268022570	0	1.61977e-07	100.79	3.67904e-08	2	975.977
ELVDYFLNVATAQGR	UniProtKB:O00754				8.14177e+07	0	4.46738e-06	100.78	2.87615e-08	2	848.434
KIGDEYFTFITDcK	UniProtKB:P49368	C13(Carbamidomethyl)			951747440	0	2.21834e-05	100.71	3.7848e-08	2	868.914
VSQMAQYFEPLTLAAVGAASK	UniProtKB:Q9Y490				137873357	0	1.05676e-06	100.65	2.8641e-08	2	1091.56
MAPALSGANLTSPR	UniProtKB:Q9UQ35				2.92846e+08	0	4.10236e-05	100.63	2.53825e-08	2	693.367
YADLTEDQLPScESLK	UniProtKB:P18669	C12(Carbamidomethyl)			3.85026e+09	0	8.39185e-08	100.63	4.01648e-08	2	934.936
LNLAFVANLFNK	UniProtKB:P13797				3.68482e+09	0	5.37143e-05	100.59	1.08118e-08	2	682.394
EALELTDTGLLSGSEER	UniProtKB:Q14204				525814694	0	4.47585e-05	100.59	3.64116e-08	2	910.453
TLTAVHDAILEDLVFPSEIVGK	UniProtKB:P62081				7091438306	0	1.27423e-12	100.58	1.42054e-08	2	1184.15
GQFYQcDLDGNLLDSWEGVR	UniProtKB:Q9H7D7	C6(Carbamidomethyl)			3.7555e+07	0	1.15891e-09	100.58	5.00578e-08	2	1186.53
KLEVEANNAFDQYR	UniProtKB:P47756				434878720	0	3.83571e-06	100.56	3.49851e-08	2	848.921
GEAAAERPGEAAVASSPSK	UniProtKB:P29966				1369288666	0	1.29451e-05	100.39	3.69942e-08	2	892.945
AMFLQPDLDSLVDFSTNNQK	UniProtKB:Q9BQG0				1.19488e+08	0	3.33321e-06	100.35	4.26643e-08	2	1142.06
NAPAIIFIDELDAIAPK	UniProtKB:P55072				9.99297e+08	0	6.21276e-07	100.34	1.22014e-08	2	906.011
VVQVSAGDSHTAALTDDGR	UniProtKB:P18754				2.8072e+08	0	1.3338e-07	100.34	3.96141e-08	3	633.647
QAFDDAIAELDTLNEDSYK	UniProtKB:Q04917				773449968	0	3.03871e-08	100.32	4.88172e-08	2	1079.49
EHAScGQTGVENMQNTQAMELAGAAPEK	UniProtKB:Q9NU22	C5(Carbamidomethyl)			47355798	0	4.06141e-07	100.31	6.109e-08	3	987.108
VGAEDADGIDMAYR	UniProtKB:P49588				4.41117e+08	0	2.53803e-06	100.29	3.36044e-08	2	741.833
DNYVPEVSALDQEIIEVDPDTK	UniProtKB:P08708				963820606	0	4.80463e-06	100.29	5.17233e-08	3	830.397
IcYQEVSQcFGVLSSR	UniProtKB:Q16531	C2(Carbamidomethyl); C9(Carbamidomethyl)			120492948	0	6.76734e-07	100.27	4.48859e-08	2	966.953
VTLLDGTEYScDLEK	UniProtKB:O43491	C11(Carbamidomethyl)			147733840	0	3.44232e-06	100.23	4.14791e-08	2	871.912
NQYDNDVTVWSPQGR	UniProtKB:P25786				218648200	0	4.95428e-05	100.2	4.32898e-08	2	889.908
MITSAAGIISLLDEDEPQLK	UniProtKB:Q99460				357142912	0	6.20586e-08	100.2	2.64533e-08	2	1072.57
EAFLNTEDKGDSLDSVEALIK	UniProtKB:Q13813				1260790408	0	4.74077e-06	100.2	4.01813e-08	2	1147.58
FSNTGEDWYVLVGVAK	UniProtKB:Q15393				2.48213e+08	0	8.22533e-06	100.15	3.51739e-08	2	892.955
TDAGGEDAILQTR	UniProtKB:Q9NT62				1.14118e+08	0	9.2415e-06	100.14	3.35702e-08	2	673.833
TFNTSTGGLLLPSDTK	UniProtKB:P12956				1.11192e+09	0	2.67537e-06	100.11	2.94057e-08	2	826.435
SGGGGGGGGSSWGGR	UniProtKB:Q13151				206957008	0	4.28554e-05	100.1	2.66248e-08	2	596.761
LYGDDALDNALQTFIK	UniProtKB:Q9UIA9				278143936	0	1.85388e-06	100.1	3.30502e-08	2	898.963
IVGLDQVTGMTETAFGSAYK	UniProtKB:P35580				458428776	0	9.10416e-09	100.1	3.81904e-08	2	1044.53
VLYcGVcSLPTEYcEYMPDVAK	UniProtKB:O43583	C4(Carbamidomethyl); C7(Carbamidomethyl); C14(Carbamidomethyl)			70442546	0	3.08553e-07	100.1	5.96359e-08	2	1327.59
AQDLSNLENTVAALK	UniProtKB:Q9NQ48				250779622	0	5.8518e-06	100.08	2.76068e-08	2	793.926
SNELGDVGVHcVLQGLQTPScK	UniProtKB:P13489	C11(Carbamidomethyl); C21(Carbamidomethyl)			1036387425	0	4.58449e-10	100.07	4.96581e-08	2	1199.58
mSASDPNSSIFLTDTAK	UniProtKB:P23381	M1(Oxidation)			81716454	0	1.67876e-06	100.05	4.57008e-08	2	900.916
IAAEIAQAEEQAR	UniProtKB:Q969G3				1.05515e+08	0	2.32788e-05	100.03	3.00616e-08	2	700.366
DNLTLWTSDMQGDGEEQNK	UniProtKB:P62258				3407937832	0	2.24229e-08	100.02	5.18507e-08	2	1090.98
LPEDPLLSGLLDSPALK	UniProtKB:P49327				3.89498e+09	0	6.72219e-09	100.01	1.28304e-08	2	889.505
VVVVQAISALcQK	UniProtKB:Q9UBF2;UniProtKB:Q9Y678	C11(Carbamidomethyl)			122262252	0	5.37143e-05	100	1.489e-08	2	707.909
GLALLNGEYLLAAQLGK	UniProtKB:Q9BV38				5.8748e+07	0	1.34169e-05	99.99	8.64488e-09	2	872.51
NQVAMNPTNTVFDAK	UniProtKB:P11142				13172671555	0	8.18089e-06	99.94	4.21382e-08	2	825.404
QEAATLAANNTQLQAR	UniProtKB:Q14980				58333818	0	2.73203e-06	99.92	3.19532e-08	2	850.445
EQEMQEcTTQIQYLK	UniProtKB:Q15007	C7(Carbamidomethyl)			60416667	0	1.54617e-05	99.9	4.98958e-08	2	964.942
VLYSNMLGEENTYLWR	UniProtKB:Q00325				0	0	3.63267e-05	99.86	4.94899e-08	2	994.475
LVEALcAEHQINLIK	UniProtKB:P25398	C6(Carbamidomethyl)			5446370556	0	3.0998e-09	99.82	2.04086e-08	2	875.983
AVcMLSNTTAVAEAWAR	UniProtKB:Q9BQE3	C3(Carbamidomethyl)			3.39143e+08	0	4.56396e-06	99.82	4.62111e-08	2	925.953
NDIEEQETLLGTIMPEEESAK	UniProtKB:Q92878				23984640	0	8.18038e-08	99.8	5.66235e-08	2	1188.56
ILSISADIETIGEILK	UniProtKB:P61978				308994589	0	6.15642e-07	99.79	7.87682e-09	2	858.006
DGScGVAYVVQEPGDYEVSVK	UniProtKB:P21333	C4(Carbamidomethyl)			240126370	0	1.72412e-05	99.79	5.67015e-08	2	1129.53
SPAGLQVLNDYLADK	UniProtKB:P24534				7983227652	0	5.9978e-07	99.77	3.08197e-08	2	802.425
ENEDENSSSTNLcVEDLQK	UniProtKB:Q9NRZ9	C13(Carbamidomethyl)			9.90965e+06	0	3.81332e-05	99.74	5.08711e-08	2	1105.97
LLEPLVTQVTTLVNTNSK	UniProtKB:P35221				3.25661e+08	0	1.02276e-07	99.71	8.13016e-09	2	985.573
ILTEAEIDAHLVALAERD	UniProtKB:P60900				6.6953e+07	0	2.6378e-08	99.71	2.34176e-08	2	990.036
FLSQPFQVAEVFTGHMGK	UniProtKB:P06576				1807374192	0	1.83651e-06	99.7	4.04927e-08	3	675.012
TDSDEEVAMLLDTVQK	UniProtKB:Q86XI2				0	0	1.74235e-05	99.69	5.07084e-08	2	897.422
DTNGSQFFITTVK	UniProtKB:P23284				994401945	0	5.37143e-05	99.66	3.75474e-08	2	729.369
MVLLESEQFLTELTR	UniProtKB:P37108				1.87707e+06	0	3.86779e-06	99.66	2.89446e-08	2	904.981
EEPGSDSGTTAVVALIR	UniProtKB:O15355				250820662	0	3.14347e-05	99.64	3.52328e-08	2	851.443
MALELLTQEFGIPIER	UniProtKB:P49588				115437052	0	2.36602e-06	99.54	2.04447e-08	2	930.513
ILHTLLASGEDALDFTQESEPSYISDVGPPGR	UniProtKB:Q8N1F7				7.87975e+08	0	1.09181e-08	99.52	5.90039e-08	3	1138.89
RQIQAAYSILSEVQQAVSQGSSDSQILDLSNR	UniProtKB:P09874				1.56476e+07	0	9.14576e-06	99.47	4.11528e-08	3	1164.6
LASGVEGSDIPDDGK	UniProtKB:O95747				214328496	0	9.85517e-07	99.45	4.36355e-08	2	730.35
GFDQTINLILDESHER	UniProtKB:O95777				1842529392	0	1.94674e-05	99.45	4.93503e-08	2	943.962
SYLEFSEDSVQVPR	UniProtKB:P51116				177178870	0	2.42386e-05	99.42	4.69494e-08	2	828.402
IAQLEEQLDNETK	UniProtKB:P35579				818155079	0	4.89869e-05	99.39	4.07844e-08	2	765.888
GSDcGIVNVNIPTSGAEIGGAFGGEK	UniProtKB:P49419	C4(Carbamidomethyl)			1.02758e+08	0	1.10698e-06	99.38	6.03602e-08	2	1253.61
HFADLLPGFLQAVNDScYQNDDSVLK	UniProtKB:O00410	C17(Carbamidomethyl)			399045836	0	1.72756e-10	99.36	6.12298e-08	3	989.484
EELQANGSAPAADKEEPAAAGSGAASPSAAEK	UniProtKB:P29966				520850754	0	1.21513e-09	99.35	6.70214e-08	3	994.807
FLVLDEADGLLSQGYSDFINR	UniProtKB:Q92499				94093739	0	3.42407e-10	99.34	5.02961e-08	2	1186.59
LSDETLIDIMTR	UniProtKB:P19367				2.0582e+08	0	4.94164e-05	99.33	3.67953e-08	2	703.864
VQSLQATFGTFESILR	UniProtKB:Q07065				3.50245e+07	0	5.05588e-05	99.29	2.52008e-08	2	898.99
LQQELDDLTVDLDHQR	UniProtKB:P35580				541147700	0	8.84242e-07	99.28	5.06889e-08	2	969.475
FEEESKEPVADEEEEDsDDDVEPITEFR	UniProtKB:P54105	S17(Phospho)	1	S(5): 0.0; S(17): 100.0; T(25): 0.0	16559073	0	1.79728e-05	99.27	6.69424e-08	3	1132.13
VAASQLTcLGcLELIAK	UniProtKB:O15294	C8(Carbamidomethyl); C11(Carbamidomethyl)			97370358	0	6.72611e-07	99.21	3.21766e-08	2	923.995
SQETEcTYFSTPLLLGK	UniProtKB:P40926	C6(Carbamidomethyl)			7.59097e+08	0	6.06726e-07	99.18	5.38383e-08	2	987.482
sVATGSSETAGGASGGGAR	UniProtKB:Q8TAE6	N-Term(Acetyl)			2.45013e+07	0	6.66433e-07	99.17	5.00159e-08	2	811.371
QEQMcNVGVSMGLTR	UniProtKB:Q9BVP2	C5(Carbamidomethyl)			9.26855e+07	0	3.61603e-05	99.17	5.33511e-08	2	855.389
ALEYTIYNQELNETR	UniProtKB:Q9UQE7				139803041	0	3.73126e-06	99.17	5.03367e-08	2	928.958
DSIFSNLTGQLDYQGFEK	UniProtKB:P40939				95472593	0	1.30276e-07	99.17	5.86837e-08	2	1031.49
APTADTQTQNVNQAK	UniProtKB:Q9Y5V3				4.13113e+07	0	6.13106e-07	99.16	4.7941e-08	2	793.893
IVILDEADSMTSAAQAALR	UniProtKB:P35249				40766769	0	1.23544e-07	99.14	3.00725e-08	2	988.029
IYVGNASVAQDIPK	UniProtKB:P51452				183519892	0	1.55118e-05	99.1	2.93788e-08	2	737.901
SDDELLDDFFHDQSTATSQAGTLSSIPTALTR	UniProtKB:Q7Z6Z7				1.49088e+07	0	5.37143e-05	99.1	6.99408e-08	3	1147.22
SLQALGEVIEAELR	UniProtKB:Q9Y285				310640682	0	1.51016e-05	99.04	2.53468e-08	2	764.425
AIVNASEMDIQNVPLSEK	UniProtKB:O43482				7027116	0	1.75558e-07	99.04	4.61844e-08	2	979.497
GPNAAYDFSQAATTGELAANK	UniProtKB:Q9Y5V3				1.89908e+07	0	5.91972e-07	98.99	6.1104e-08	2	1049
LTEMETLQSQLMAEK	UniProtKB:P35579				741284338	0	1.22747e-06	98.94	5.39997e-08	2	876.431
QGFGELLQAVPLADSFR	UniProtKB:P27695				1.9437e+08	0	3.39452e-07	98.93	3.04749e-08	2	924.499
LQPSSTSESMDQLLNK	UniProtKB:Q99700				72941750	0	1.15756e-05	98.91	5.53573e-08	2	889.438
LDVATDNFFQNPELYIR	UniProtKB:Q96GG9				143800614	0	2.97193e-06	98.86	4.67996e-08	2	1028.02
SPTAALNESLVEcPK	UniProtKB:Q53EZ4	C13(Carbamidomethyl)			6.17832e+07	0	1.187e-05	98.84	4.9961e-08	2	808.407
ITScIFQLLQEAGIK	UniProtKB:P22234	C4(Carbamidomethyl)			1.81102e+09	0	4.51898e-06	98.83	2.18568e-08	2	860.981
EVEETDEMDQVELVDFDPNQER	UniProtKB:P31689				1.33715e+08	0	1.66474e-10	98.83	7.42306e-08	2	1333.56
YQPLASTASDNDFVTPEPR	UniProtKB:Q15021				106061608	0	5.37143e-05	98.82	6.47505e-08	2	1054.5
NPSTNFQEPVQPLTQQQVAQMQLK	UniProtKB:P19623				419375552	0	6.86126e-07	98.77	4.86623e-08	2	1377.7
NAPAIIFIDELDAIAPKR	UniProtKB:P55072				166868468	0	8.08304e-07	98.76	1.63313e-08	3	656.372
VTWDSSFcAVNPR	UniProtKB:Q9ULV4	C8(Carbamidomethyl)			2.62866e+08	0	3.47467e-05	98.74	5.2047e-08	2	769.856
SSILLDVKPWDDETDMAK	UniProtKB:P24534				4273866091	0	2.7029e-07	98.73	5.8718e-08	2	1032.01
MAATFIGNSTAIQELFK	UniProtKB:P04350				1.4317e+08	0	1.60066e-05	98.7	4.85964e-08	2	921.471
QLSQSLLPAIVELAEDAK	UniProtKB:P30153;UniProtKB:P30154				524070541	0	1.61063e-06	98.67	1.66461e-08	3	642.366
MLVLDEADEMLNK	UniProtKB:P38919				1467706306	0	4.86979e-05	98.64	5.27465e-08	2	760.872
GEVLGDVLQLETLK	UniProtKB:Q14980				330745508	0	1.6979e-05	98.63	2.21397e-08	2	757.43
TYADYESVNEcmEGVcK	UniProtKB:P84090	C11(Carbamidomethyl); M12(Oxidation); C16(Carbamidomethyl)			98890208	0	1.12368e-06	98.63	4.7549e-08	2	1035.91
APQETYADIGGLDNQIQEIK	UniProtKB:P62191				2.81568e+08	0	1.04591e-08	98.63	5.46708e-08	2	1102.06
ELAQQVQQVADDYGK	UniProtKB:Q92841				1.43421e+09	0	1.42171e-05	98.62	5.73456e-08	2	846.418
DQVTAQEIFQDNHEDGPTAK	UniProtKB:P13010				2526490720	0	3.03641e-08	98.59	7.46711e-08	2	1122.02
RGAYGGGYGGYDDYNGYNDGYGFGSDR	UniProtKB:P31943				120349731	0	4.0492e-08	98.54	7.01403e-08	3	958.387
VIQGDGVDINTLQEIVEGMK	UniProtKB:P43490				2.84371e+07	0	2.3275e-08	98.52	4.05082e-08	2	1079.57
VLVDSSFGQPTTQGEAR	UniProtKB:Q10570				116916900	0	4.27916e-06	98.51	5.80063e-08	2	896.444
GDVTAEEAAGASPAK	UniProtKB:P49006				1448394580	0	5.17348e-05	98.5	5.09361e-08	2	687.332
mGGMEGPFGGGMENMGR	UniProtKB:P52272	M1(Oxidation)			128345042	0	2.88095e-06	98.49	4.06404e-08	2	865.841
KQEETAVLEEDSADWEK	UniProtKB:Q96A49				348699615	0	1.0741e-07	98.49	7.03366e-08	2	1003.97
VFIWTcDDASSNTWSPK	UniProtKB:P55735	C6(Carbamidomethyl)			300569064	0	1.48171e-06	98.49	7.10233e-08	2	1007.46
VFQTEAELQEVISDLQSK	UniProtKB:Q92878				5.72446e+07	0	5.12926e-08	98.44	4.42116e-08	2	1032.54
LLDFGSLSNLQVTQPTVGmNFK	UniProtKB:P08708	M19(Oxidation)			1.12601e+08	0	7.05632e-10	98.39	4.8983e-08	2	1213.13
LQVEPAVDTSGVQcYGPGIEGQGVFR	UniProtKB:P21333	C14(Carbamidomethyl)			5.36556e+08	0	1.00698e-09	98.35	7.16832e-08	2	1382.18
IGIIGGTGLDDPEILEGR	UniProtKB:Q13126				1370691458	0	7.0838e-06	98.31	3.73428e-08	2	912.99
LAELEEFINGPNNAHIQQVGDR	UniProtKB:Q00610				3929170592	0	3.51247e-09	98.28	6.52623e-08	2	1232.62
VVSEDFLQDVSASTK	UniProtKB:P09874				1173220780	0	7.3529e-06	98.27	5.42351e-08	2	812.911
ILDPEGLALGAVIASSK	UniProtKB:Q8IY81				178201904	0	1.72563e-07	98.27	1.41862e-08	2	827.481
IDSANMNDDITTSLR	UniProtKB:Q9Y2L1				101738967	0	3.65481e-06	98.27	6.41244e-08	2	833.392
NALLQLTDSQIADVAR	UniProtKB:O75643				535824590	0	3.87902e-06	98.27	3.03308e-08	2	864.474
MNLSEEVDLEDYVARPDK	UniProtKB:P43686				3.17401e+08	0	4.64812e-06	98.26	7.41098e-08	2	1062.01
ILGGVISAISEAAAQYNPEPPPPR	UniProtKB:P04632				517867096	0	1.9516e-10	98.26	3.27743e-08	3	816.441
LLLLESVSGLLQPR	UniProtKB:Q8IZL8				1.8022e+08	0	5.37143e-05	98.22	3.81925e-09	2	769.479
AIIASNIMYIVGQYPR	UniProtKB:O14980				181655439	0	2.44936e-05	98.15	3.73432e-08	2	904.987
MAPYQGPDAVPGALDYK	UniProtKB:O43707				577758676	0	1.78946e-07	98.13	7.06321e-08	2	896.934
NDVMNLLESAGFSR	UniProtKB:Q9UQE7				175388200	0	5.00909e-05	98.12	6.11361e-08	2	776.871
NMFLVGEGDSVITQVLNK	UniProtKB:O75475				1.96913e+08	0	1.71105e-05	98.12	4.65516e-08	2	982.515
GTGGVDTAAVGGVFDVSNADR	UniProtKB:P12277				56810740	0	3.17709e-07	98.12	7.26141e-08	2	982.97
LELSDNIISGGLEVLAEK	UniProtKB:Q9BTT0				285819135	0	1.9967e-06	98.11	3.10364e-08	2	950.52
QLVLQTGALVLSDNGIccIDEFDK	UniProtKB:P33991	C17(Carbamidomethyl); C18(Carbamidomethyl)			1.30779e+07	0	3.55869e-08	98.11	7.2681e-08	2	1354.67
LNVFKNDQDTWDYTNPNLSGQGDPGSNPNK	UniProtKB:P14866				299250980	0	7.40508e-10	98.11	1.02072e-07	3	1112.51
SLDLFNcEVTNLNDYR	UniProtKB:P39687;UniProtKB:Q92688	C7(Carbamidomethyl)			4.1476e+09	0	4.17656e-06	98.07	7.71199e-08	2	986.961
VMQPQILEVNFNPDcER	UniProtKB:Q14166	C15(Carbamidomethyl)			4.21616e+07	0	1.96815e-05	98.04	7.7466e-08	2	1044.99
FADQDDIGNVSFDR	UniProtKB:Q5H9R7				123506084	0	1.72518e-06	98.03	6.28806e-08	2	799.857
HGLEVIYMIEPIDEYcVQQLK	UniProtKB:P07900	C16(Carbamidomethyl)			2989925108	0	1.0769e-08	98.02	6.89968e-08	2	1289.14
ESADPLGAWLQDAR	UniProtKB:Q15149				45543748	0	1.03462e-05	98	6.06142e-08	2	764.875
LVVGGLLSPEEDQSLLLSQFR	UniProtKB:Q9BVI4				146866046	0	9.69339e-07	98	1.82025e-08	2	1150.64
LSNKVEAIDVEEAK	UniProtKB:P33991				494560988	0	5.37143e-05	97.96	4.50036e-08	2	772.912
ISGSILNELIGLVR	UniProtKB:Q86VP6				1.90973e+07	0	5.59743e-06	97.95	7.34286e-09	2	742.455
EIVHIQAGQcGNQIGAK	UniProtKB:Q13885;UniProtKB:Q9BVA1;UniProtKB:Q13509;UniProtKB:P07437	C10(Carbamidomethyl)			1.56987e+10	0	1.32871e-08	97.95	5.75645e-08	2	911.968
ANDEANQSDTSVSLSEPK	UniProtKB:O95684				7.94373e+06	0	5.37143e-05	97.92	7.42686e-08	2	946.43
SLGYAYVNFQQPADAER	UniProtKB:Q13310;UniProtKB:P11940				597784854	0	3.78243e-05	97.92	7.3639e-08	2	964.963
IFYPEIEEVQALDDTER	UniProtKB:P33316				658124143	0	3.08973e-06	97.91	7.49252e-08	2	1034
ALDLLEYIDEEEDININDLK	UniProtKB:Q8WUM0				3.54003e+07	0	3.40528e-08	97.91	7.13007e-08	2	1189.09
IFTLNLSAPFISQFYK	UniProtKB:P55263				5.50098e+07	0	2.30714e-05	97.9	2.54786e-08	2	945.027
HAQGGTWYGVDINNEDIADNFEAFVWEPAMVR	UniProtKB:Q99832				91258247	0	1.21131e-09	97.89	1.08879e-07	3	1217.89
ISTAIDDMEAYTK	UniProtKB:Q9Y3Z3				115336180	0	5.37143e-05	97.88	6.14326e-08	2	729.345
GEMMDLQHGSLFLQTPK	UniProtKB:P07195				1310437026	0	2.99157e-07	97.87	7.27525e-08	2	966.472
QLQQAQAAGAEQEVEK	UniProtKB:P39748				190326139	0	1.64797e-06	97.84	6.26752e-08	2	864.435
MQQLEQMLTALDQMR	UniProtKB:P40763				16977196	0	2.18472e-05	97.82	7.51643e-08	2	918.445
VIAINVDDPDAANYNDINDVK	UniProtKB:Q15181				8.86311e+08	0	1.30411e-07	97.76	8.1553e-08	2	1144.56
QLcDNAGFDATNILNK	UniProtKB:Q99832	C3(Carbamidomethyl)			1580949569	0	1.51925e-05	97.73	7.82055e-08	2	897.428
ELQELNELFKPVVAAQK	UniProtKB:Q8WU90				4.40739e+08	0	1.73466e-05	97.63	2.3644e-08	2	978.55
EVLHNQLLLQTQLVDQLQQQEAQGK	UniProtKB:Q08379				0	0	1.36163e-09	97.61	3.24741e-08	3	967.857
NQGGGLSSSGAGEGQGPK	UniProtKB:P07814				131497516	0	8.13793e-06	97.54	7.19062e-08	2	794.368
EADSSSDYVNMDFTK	UniProtKB:O14654				82173658	0	1.66502e-05	97.53	6.14493e-08	2	854.853
VISLQEcLDEANAALDSASR	UniProtKB:Q15643	C7(Carbamidomethyl)			17739443	0	3.50004e-08	97.52	8.51157e-08	2	1081.52
GAIILSSLLQScDLEVANK	UniProtKB:Q15397	C12(Carbamidomethyl)			0	0	1.20515e-06	97.51	3.99459e-08	2	1016.05
EGTQASEGYFSQSQEEEFAQSEELcAK	UniProtKB:Q16643	C25(Carbamidomethyl)			34018359	0	2.81561e-05	97.49	1.1237e-07	3	1023.78
EEDGSLSLDGADSTGVVAK	UniProtKB:Q13263				37694661	0	5.37143e-05	97.48	8.3822e-08	2	925.431
ETVYcLNDDDETEVLKEDIIQGFR	UniProtKB:P13010	C5(Carbamidomethyl)			5.30119e+09	0	2.7057e-08	97.47	1.06219e-07	2	1451.19
ScQMNLVADLVQEVQQAR	UniProtKB:Q13158	C2(Carbamidomethyl)			333069032	0	1.51657e-07	97.44	7.77551e-08	2	1045.02
aDVLDLHEAGGEDFAMDEDGDESIHK	UniProtKB:Q9Y5S9	N-Term(Acetyl)			8.40709e+08	0	2.74679e-10	97.44	1.12644e-07	3	953.078
AMGPLVLTEVLFNEK	UniProtKB:P55010				1.93283e+08	0	3.07592e-05	97.42	3.23777e-08	2	830.963
IFcGDLGNEVNDDILAR	UniProtKB:Q9BTD8	C3(Carbamidomethyl)			227903916	0	2.8164e-07	97.42	8.7533e-08	2	960.954
YGGTFQNVSVQLPITLNK	UniProtKB:O94973				42654096	0	5.37143e-05	97.42	3.40804e-08	2	990.043
VVIEDEQLVLGASQEPVGR	UniProtKB:Q6IBS0				1.13438e+08	0	2.44925e-07	97.4	4.20078e-08	2	1019.55
MQQQLDEYQELLDIK	UniProtKB:P02545				469519335	0	1.60128e-05	97.36	7.62806e-08	2	947.471
HNVEVLGILSDDVETDTVAPGENLK	UniProtKB:P15170				239488496	0	6.15393e-09	97.33	6.92644e-08	3	888.788
NPDDITQEEYGEFYK	UniProtKB:P08238				7344743470	0	5.37143e-05	97.31	8.34804e-08	2	924.406
IGPSILNSDLANLGAEcLR	UniProtKB:Q96AT9	C17(Carbamidomethyl)			3.94355e+08	0	5.63021e-08	97.29	5.13348e-08	2	1007.03
GLTTTGNSSLNSTSNTK	UniProtKB:Q96KR1				7.07261e+07	0	3.77756e-05	97.28	7.41258e-08	2	841.916
ESSSVLScDISVDDK	UniProtKB:Q04724;UniProtKB:Q04727	C8(Carbamidomethyl)			9.24817e+07	0	9.10162e-06	97.23	7.83525e-08	2	820.871
DQLDETVNVEPLTK	UniProtKB:Q14203				133006053	0	9.34466e-06	97.17	6.75371e-08	2	800.912
SPPTVLVIcGPGNNGGDGLVcAR	UniProtKB:Q8NCW5	C9(Carbamidomethyl); C21(Carbamidomethyl)			44952100	0	5.78329e-06	97.16	8.33756e-08	3	770.721
TEDGGEFEEGASENNAK	UniProtKB:O43719				1.70129e+08	0	1.38088e-06	97.13	6.97306e-08	2	892.37
EALcGcTVNVPTLDGR	UniProtKB:P25685	C4(Carbamidomethyl); C6(Carbamidomethyl)			1.8791e+08	0	5.37143e-05	97.1	8.70801e-08	2	881.419
TSQDFLFSQLQYLPFSNK	UniProtKB:Q92621				1.21035e+08	0	4.70154e-07	97.07	7.68852e-08	2	1082.05
SIQTIcSGLLTDVEDQAAK	UniProtKB:Q6PCB5	C6(Carbamidomethyl)			53456994	0	1.99508e-07	97.06	7.80562e-08	2	1025.02
AVQLYQQTANVFENEER	UniProtKB:Q99747				2.14003e+07	0	1.31661e-05	97.04	9.03277e-08	2	1019.99
GITNLcVIGGDGSLTGANLFR	UniProtKB:Q01813	C6(Carbamidomethyl)			4.50177e+07	0	6.89529e-08	97.01	5.49028e-08	2	1068.07
cVLLSNLSSTSHVPEVDPGSAELQK	UniProtKB:P49327	C1(Carbamidomethyl)			2.11072e+09	0	6.45397e-10	96.97	8.46833e-08	2	1334.17
LNNNEFTVLEATGIFK	UniProtKB:O94813				20896488	0	4.46672e-05	96.95	5.09638e-08	2	905.485
TSSGDASSLSIEETNK	UniProtKB:O43290				3.97866e+07	0	2.23317e-06	96.94	8.4896e-08	2	813.38
AQLQQVEAALSGNGENEDLLK	UniProtKB:O75940				138983720	0	7.62816e-10	96.91	7.97808e-08	2	1114.07
DAFLGSFLYEYSR	UniProtKB:CON_P02769				361661390	0	5.37143e-05	96.9	8.14245e-08	2	784.372
STAISLFYELSENDLNFIK	UniProtKB:P13639				5.70104e+08	0	2.9261e-08	96.9	7.8515e-08	2	1102.56
IIGLDQVAGMSETALPGAFK	UniProtKB:P35579				1739201774	0	8.02237e-07	96.84	4.50049e-08	2	1009.55
sDYSTGGPPPGPPPPAGGGGGAGGAGGGPPPGPPGAGDR	UniProtKB:Q92945	N-Term(Acetyl)			76954780	0	2.02348e-09	96.82	1.33527e-07	3	1082.84
TIIGSFNGALAAVPVQDLGSTVIK	UniProtKB:Q9BWD1				298693465	0	7.76572e-06	96.81	1.95838e-08	2	1186.17
IQVLQQQADDAEER	UniProtKB:A6NL28				1254831589	0	2.60395e-05	96.8	8.07304e-08	2	821.911
SMEAEMIQLQEELAAAER	UniProtKB:P35579				486425932	0	1.79883e-07	96.78	1.02806e-07	2	1024.98
LQQELDDLLVDLDHQR	UniProtKB:P35579				6.65438e+08	0	4.34621e-08	96.77	6.92248e-08	3	650.672
ELMDEEDVLQEcK	UniProtKB:Q5H9R7	C12(Carbamidomethyl)			93373464	0	5.18947e-05	96.74	8.06142e-08	2	819.355
TIAQGNLSNTDVQAAK	UniProtKB:P22695				1.67415e+08	0	7.60336e-06	96.71	6.99639e-08	2	815.926
TMLELINQLDGFDPR	UniProtKB:P35998				1.22435e+08	0	3.73747e-05	96.71	6.67323e-08	2	881.461
DSLPVcPVDASGcFTTEVTDFAGQYVK	UniProtKB:P41252	C6(Carbamidomethyl); C13(Carbamidomethyl)			2.07143e+08	0	1.82291e-09	96.69	1.37949e-07	2	1482.18
IEESITEDLSLADLMPR	UniProtKB:P42285				38206065	0	1.18031e-06	96.67	8.23762e-08	2	966.488
KVESLQEEIAFLK	UniProtKB:P08670				4.45037e+09	0	2.07041e-06	96.62	3.44296e-08	2	767.433
TALPTSGSSAGELELLAGEVPAR	UniProtKB:Q9Y6I3				14890419	0	6.0689e-09	96.61	5.34332e-08	2	1113.59
TDScDVNDcVQQVVELLQER	UniProtKB:O43252	C4(Carbamidomethyl); C9(Carbamidomethyl)			129216988	0	9.97576e-08	96.6	1.23849e-07	2	1204.05
cELLYEGPPDDEAAMGIK	UniProtKB:P13639	C1(Carbamidomethyl)			975173280	0	1.91947e-06	96.57	1.08902e-07	2	1004.46
VSSTATTQDVIETLAEK	UniProtKB:P55196				52181763	0	2.89532e-06	96.56	7.48514e-08	2	896.964
TAGPQSQVLcGVVMDR	UniProtKB:P35611	C10(Carbamidomethyl)			0	0	1.84744e-05	96.53	8.89657e-08	2	859.425
AALMESQGQQQEER	UniProtKB:Q14980				8.80761e+07	0	5.37143e-05	96.51	9.26932e-08	2	802.873
VASGIcDNLLTcVMR	UniProtKB:Q96CD2	C6(Carbamidomethyl); C12(Carbamidomethyl)			49698044	0	1.93433e-05	96.51	9.47705e-08	2	854.916
ETTDTDTADQVIASFK	UniProtKB:O43707				9.32799e+08	0	2.02505e-05	96.5	9.83022e-08	2	871.412
VAPAPAAADAEVEQTDAESK	UniProtKB:O43823				68942404	0	7.91404e-08	96.5	1.03306e-07	2	985.473
LLTSQcGAAEEEFVQR	UniProtKB:P82933	C6(Carbamidomethyl)			16691790	0	1.26422e-05	96.49	9.62289e-08	2	919.452
SAYDSTMETMNYAQIR	UniProtKB:P53396				1.05969e+08	0	1.87252e-05	96.49	1.02231e-07	2	940.91
FQSSHHPTDITSLDQYVER	UniProtKB:P14625				8.23018e+08	0	3.9889e-09	96.49	1.20093e-07	3	754.028
TVAGQDAVIVLLGTR	UniProtKB:P30043				0	0	2.42459e-05	96.48	2.41099e-08	2	756.943
AFADAMEVIPSTLAENAGLNPISTVTELR	UniProtKB:P50991				1036343558	0	1.93123e-07	96.46	6.19989e-08	3	1010.87
VDFPQDQLTALTGR	UniProtKB:P40926				4.50718e+08	0	3.47467e-05	96.43	6.98796e-08	2	780.911
LQDTYNLDTDTISK	UniProtKB:P13674				9.01308e+07	0	4.24491e-05	96.4	9.01915e-08	2	813.9
TVSLLDENNVSSYLSK	UniProtKB:P78527				30865589	0	3.47259e-06	96.39	7.88153e-08	2	884.954
GYEVIYLTEPVDEYcIQALPEFDGK	UniProtKB:P14625	C15(Carbamidomethyl)			283879908	0	2.87094e-09	96.39	1.41018e-07	2	1474.69
VNQWTTNVVEQTLSQLTK	UniProtKB:P63172				181172169	0	1.29469e-07	96.38	5.68571e-08	2	1045.06
TQGFLALFSGDTGEIK	UniProtKB:Q9Y230				803456746	0	6.10204e-07	96.37	7.82333e-08	2	842.435
DMIILPEMVGSMVGVYNGK	UniProtKB:P62841				568835944	0	1.03277e-06	96.37	8.44846e-08	2	1027.02
MAEIGEHVAPSEAANSLEQAQAAAER	UniProtKB:P27708				370499920	0	2.53501e-10	96.34	1.29423e-07	3	894.095
FTQAGSEVSALLGR	UniProtKB:P06576				1217096566	0	5.00623e-05	96.31	6.14529e-08	2	718.384
GMTSESDSIGLTPGEK	UniProtKB:P52701				96781549	0	5.34671e-05	96.31	9.7319e-08	2	804.876
LLLQQLEATLETGK	UniProtKB:Q14CX7				186764497	0	1.36203e-05	96.29	2.83248e-08	2	778.952
ALYEQNQSDVNEAK	UniProtKB:Q14691				9.11179e+07	0	1.98542e-05	96.29	9.71691e-08	2	804.881
SINPLGGFVHYGEVTNDFVMLK	UniProtKB:P39023				6.46062e+08	0	5.61783e-12	96.26	9.10642e-08	2	1219.12
NPNAMLVNLEEPLASTYQDILYQAK	UniProtKB:P46940				6.89411e+07	0	1.09495e-08	96.17	7.9529e-08	3	945.825
GLFDDEDEESDLFTEAPQDR	UniProtKB:Q641Q2;UniProtKB:Q5SNT6				2.42099e+07	0	2.11791e-05	96.14	1.25781e-07	2	1164.5
AVTDSINQLITMcTQQAPGQK	UniProtKB:Q9Y490	C13(Carbamidomethyl)			4.15893e+08	0	5.96123e-08	96.12	1.09515e-07	2	1152.57
ALVDELEWEIAQVDPK	UniProtKB:Q9Y2B0				521985693	0	1.63188e-06	96.1	7.04133e-08	2	927.991
VEVITGEEAESNVLQMQcK	UniProtKB:Q9H6Z4	C18(Carbamidomethyl)			14851053	0	2.07075e-06	96.09	1.23424e-07	2	1082.52
EYQVETIVDTLcTNMLSDK	UniProtKB:Q86VP6	C12(Carbamidomethyl)			276190880	0	4.829e-07	96.06	1.24206e-07	2	1130.05
VVLAYEPVWAIGTGK	UniProtKB:P60174				9901702498	0	4.422e-05	96.04	3.91248e-08	3	534.971
EDAQVAAEILEIADTPSGDK	UniProtKB:P08133				7.16309e+07	0	1.89981e-07	96.04	1.08776e-07	2	1036.51
GcIVDANLSVLNLVIVK	UniProtKB:P62753	C2(Carbamidomethyl)			46557085	0	1.21945e-06	96.03	1.71628e-08	2	914.036
SVVcQESDLPDELLYGR	UniProtKB:Q9NS86	C4(Carbamidomethyl)			9.2591e+07	0	4.28379e-05	96.01	1.21183e-07	2	990.462
APPAPGPASGGSGEVDELFDVK	UniProtKB:O14579				339722437	0	3.17668e-08	95.99	1.17752e-07	2	1049.01
AAFGEEVDAVDTGISR	UniProtKB:O00273				351680720	0	4.62612e-06	95.98	1.0398e-07	2	818.897
AQQEFAAGVFSNPAVR	UniProtKB:O14828				1.33389e+08	0	2.82091e-06	95.98	8.90032e-08	2	846.434
ALESDMAPVLIMATNR	UniProtKB:Q9Y230				735191320	0	2.61163e-06	95.92	8.75164e-08	2	866.446
GFDTSSSSSNSAASSSFK	UniProtKB:P49790				2.70752e+07	0	2.19596e-07	95.89	1.08077e-07	2	877.381
LEAELGNMQGLVEDFK	UniProtKB:CON_P05787				65420217	0	6.25519e-06	95.84	1.05067e-07	2	896.95
VLLDWINDVLVEER	UniProtKB:Q9HBI1				1.30281e+07	0	2.98271e-05	95.83	4.21864e-08	2	856.981
LDEYLNSPLPDEIDENSMEDIK	UniProtKB:Q9Y696				304403762	0	9.02822e-09	95.83	1.52224e-07	2	1290.1
RGFEVVYMTEPIDEYcVQQLK	UniProtKB:P08238	C16(Carbamidomethyl)			6198379649	0	6.46866e-07	95.83	1.36721e-07	2	1302.63
FQDLGAAYEVLSDSEK	UniProtKB:Q9UBS4				2.30612e+08	0	1.30107e-06	95.81	1.18247e-07	2	886.42
DDANNDPQWSEEQLIAAK	UniProtKB:P22234				457577417	0	1.34398e-06	95.76	1.3646e-07	2	1022.47
DRSGVISDTELQQALSNGTWTPFNPVTVR	UniProtKB:O75340				79603732	0	4.06536e-06	95.71	1.23526e-07	3	1063.53
VYQSLcPTSWVTDWDEQR	UniProtKB:P14854	C6(Carbamidomethyl)			33702400	0	4.29699e-09	95.69	1.50804e-07	2	1135.52
cEYPAAcNALETLLIHR	UniProtKB:P54886	C1(Carbamidomethyl); C7(Carbamidomethyl)			48951907	0	9.72592e-09	95.68	1.25639e-07	3	677.663
HIADLAGNSEVILPVPAFNVINGGSHAGNK	UniProtKB:P06733				5591758192	0	4.90198e-11	95.66	6.73949e-08	4	753.652
QLQNISLAAASGGAK	UniProtKB:Q14204				201131708	0	2.07244e-05	95.54	6.08775e-08	2	714.896
aAAAAAAAAAGAAGGR	UniProtKB:Q86U42	N-Term(Acetyl)			5.23612e+08	0	1.71201e-05	95.53	7.49427e-08	2	620.825
TLSLDEVYLIDSGAQYK	UniProtKB:Q9NQW7				58735550	0	2.43746e-07	95.53	1.00847e-07	2	957.99
NLDQEQLSQVLDAMFER	UniProtKB:P13861				1.95203e+08	0	1.0452e-06	95.53	1.21294e-07	2	1018.5
VIMGEEVEPVGLMTGSGVVGVK	UniProtKB:P27708				1.62012e+08	0	8.91033e-09	95.52	8.58743e-08	2	1094.07
HELQANcYEEVK	UniProtKB:P23528	C7(Carbamidomethyl)			2.64553e+09	0	1.54675e-06	95.5	1.10734e-07	2	760.348
TLSFSSDNIAVLSAAADSIK	UniProtKB:Q9UNX4				1.76493e+07	0	2.53408e-07	95.49	7.62718e-08	2	1005.53
TAAANAAAGAAENAFRAP	UniProtKB:O14828				107404457	0	3.65364e-06	95.48	1.09391e-07	2	822.912
KLEGDSTDLSDQIAELQAQIAELK	UniProtKB:P35579				135598276	0	1.89722e-06	95.46	6.76271e-08	3	872.466
TLLVSTSAVDNNEAQK	UniProtKB:Q5T8P6				3.67594e+07	0	2.999e-06	95.45	8.96075e-08	2	845.441
VADYcENNYIQATDK	UniProtKB:Q8IZP0	C5(Carbamidomethyl)			4.32998e+07	0	1.10248e-06	95.44	1.2079e-07	2	902.392
DASIVGFFDDSFSEAHSEFLK	UniProtKB:P30101				8.30677e+08	0	9.27412e-09	95.43	1.62241e-07	2	1174.54
EFNEDGALAVLQQFK	UniProtKB:O60506				914204552	0	2.96367e-06	95.42	1.02702e-07	2	854.936
SLLVIPNTLAVNAAQDSTDLVAK	UniProtKB:P17987				2.0864e+09	0	4.86718e-07	95.4	2.93306e-08	3	785.112
ELETVcNDVLSLLDK	UniProtKB:Q04917	C6(Carbamidomethyl)			2711664718	0	2.97292e-05	95.38	1.05594e-07	2	874.445
LYLDELEGGGNPGAScK	UniProtKB:Q9HD26	C16(Carbamidomethyl)			67708133	0	1.65025e-06	95.38	1.3151e-07	2	890.409
QPAIMPGQSYGLEDGScSYK	UniProtKB:P14866	C17(Carbamidomethyl)			1000645542	0	5.89389e-07	95.38	1.53183e-07	2	1094.49
QGAIVAVTGDGVNDSPALK	UniProtKB:P05023;UniProtKB:P50993;UniProtKB:P13637				2.94021e+08	0	2.2082e-06	95.37	7.4372e-08	2	906.485
LLLEQAANEIWESIK	UniProtKB:O95352				9.1112e+07	0	2.36904e-06	95.36	5.48961e-08	2	878.986
ENPGFDFSGAEISGNYTK	UniProtKB:Q8WVJ2				97274863	0	4.63807e-08	95.36	1.38492e-07	2	966.935
LGGSLADSYLDEGFLLDKK	UniProtKB:P78371				918877368	0	4.38482e-05	95.35	9.10529e-08	2	1021.03
QILVGDIGDTVEDPYTSFVK	UniProtKB:Q9Y281				715185036	0	8.50288e-09	95.33	1.14041e-07	2	1098.56
LLPcLHSAcSAcLGPAAPAAANSSGDGGAAGDGTVVDcPVcK	UniProtKB:Q13263	C4(Carbamidomethyl); C9(Carbamidomethyl); C12(Carbamidomethyl); C38(Carbamidomethyl); C41(Carbamidomethyl)			1048295020	0	1.90478e-13	95.33	1.93043e-07	3	1371.3
TGGADQSLQQGEGSK	UniProtKB:P09132				9.46215e+07	0	2.7041e-06	95.28	1.12916e-07	2	731.848
EVIAEEEPPTVTEPLPENR	UniProtKB:Q02952				74870404	0	3.36299e-06	95.27	1.16653e-07	2	1075.05
KLELSDNIISGGLEVLAEK	UniProtKB:Q9BTT0				100643060	0	1.08885e-08	95.21	4.48335e-08	2	1014.57
AVEQEDELSDVSQGGSK	UniProtKB:O60271				8.01425e+06	0	2.07912e-05	95.2	1.38253e-07	2	889.412
AIEEGTLEEIEEEVR	UniProtKB:P51532				1.04728e+08	0	1.2008e-05	95.19	1.31822e-07	2	873.422
QVYDGFSFIGNTGPYEVSK	UniProtKB:Q99598				36128308	0	1.99178e-05	95.19	1.47153e-07	2	1054.5
ILQEAQNLMALTNVDTPLK	UniProtKB:Q99459				234022128	0	1.5655e-07	95.19	6.64862e-08	2	1056.57
GLATSLQNDLQEVPK	UniProtKB:Q8N0X7				96666355	0	5.37143e-05	95.17	7.20234e-08	2	806.939
EFTMAEIEHFVDPSEK	UniProtKB:P41250				560067620	0	1.72328e-07	95.15	1.46545e-07	2	954.927
LHISPSNMTNQNTNEYLEK	UniProtKB:Q13547				680538960	0	1.70791e-05	95.15	1.57619e-07	3	745.025
NPTVEYMNSIYNPVPWEK	UniProtKB:O60678				4.47032e+07	0	1.58182e-05	95.13	1.6074e-07	2	1091.02
GPVEGYEENEEFLR	UniProtKB:Q9UI30				536728012	0	1.50854e-05	95.12	1.30688e-07	2	834.38
TATEEWGTEDWNEDLSETK	UniProtKB:Q14157				1.72736e+08	0	1.84354e-07	95.08	1.56749e-07	2	1120.98
INNVIDNLIVAPGTFEVQIEEVR	UniProtKB:Q12905				2.91976e+08	0	5.82384e-07	95.08	6.11133e-08	3	861.468
GFGFVTFSSMAEVDAAMAARPHSIDGR	UniProtKB:P22626				2.63549e+08	0	2.5926e-05	95.07	1.73805e-07	4	707.593
INEAIVAVQAIIADPK	UniProtKB:Q9Y224				352054635	0	5.01071e-07	95.02	3.2107e-08	2	832.982
AIDIYEQVGTNAMDSPLLK	UniProtKB:P54920				9.1905e+06	0	2.91703e-07	95.01	1.08169e-07	2	1039.54
ISFDEFVYIFQEVK	UniProtKB:P13797				221147325	0	7.09219e-06	94.99	1.12329e-07	2	882.452
AGLQEGDQVLAVNDVDFQDIEHSK	UniProtKB:Q5EBL8				8.10729e+07	0	8.02821e-11	94.99	1.66846e-07	3	876.425
LAVEALSSLDGDLAGR	UniProtKB:P12277				6229949788	0	1.1581e-06	94.95	8.88013e-08	2	793.926
VLGTEDLYDYIDK	UniProtKB:P68400				5.0993e+08	0	1.67712e-05	94.94	1.21437e-07	2	772.381
ISGADINSIcQESGMLAVR	UniProtKB:P43686	C10(Carbamidomethyl)			291002264	0	3.72075e-08	94.93	1.45964e-07	2	1011
VDEAVAVLQAHQAK	UniProtKB:P11940;UniProtKB:Q9H361				1402832545	0	3.18224e-07	94.91	6.81858e-08	2	739.908
VNEASGDGDGEDAVVILEK	UniProtKB:Q96C86				5.25765e+07	0	6.03966e-06	94.91	1.51917e-07	2	958.958
NAIANASTLAEVER	UniProtKB:P09661				717065554	0	3.98104e-05	94.9	1.00217e-07	2	729.883
RGGDGYDGGYGGFDDYGGYNNYGYGNDGFDDR	UniProtKB:P31942				2.03393e+07	0	1.25024e-06	94.89	1.5591e-07	3	1145.78
DFIDSLGLLHEQNMAK	UniProtKB:Q7L2H7				1318246400	0	5.18592e-09	94.86	1.31958e-07	2	915.957
VETGVLKPGMVVTFAPVNVTTEVK	UniProtKB:P68104;UniProtKB:Q5VTE0				1.29898e+10	0	5.93689e-11	94.85	4.18505e-08	2	1258.2
ARENPSEEAQNLVEFTDEEGYGR	UniProtKB:Q12874				703318045	0	3.87307e-08	94.83	2.00632e-07	3	880.73
ALPDMEVVGLNFSSATTPELLLK	UniProtKB:Q14204				0	0	1.06239e-06	94.81	7.6431e-08	2	1223.15
MSASDPNSSIFLTDTAK	UniProtKB:P23381				2.5417e+08	0	3.18178e-06	94.79	1.47311e-07	2	892.927
LMSSNSTDLPLNIEcFMNDK	UniProtKB:Q92598	C15(Carbamidomethyl)			386839802	0	1.81134e-07	94.79	1.86757e-07	2	1165.04
VYVGSIYYELGEDTIR	UniProtKB:Q9UHX1				799794228	0	2.55912e-06	94.76	1.33762e-07	2	938.972
ISLGLPVGAVINcADNTGAK	UniProtKB:P62829	C13(Carbamidomethyl)			5535672546	0	4.00752e-06	94.76	8.17608e-08	2	985.528
aSMGTLAFDEYGRPFLIIK	UniProtKB:P48643	N-Term(Acetyl)			3.10487e+09	0	5.67726e-07	94.76	9.60811e-08	2	1086.07
ELEIESQTEEQPTTK	UniProtKB:Q9NYH9				5.53044e+07	0	3.47689e-05	94.74	1.46801e-07	2	881.426
VMLPGQcQYLGLPVADYFK	UniProtKB:O43414	C7(Carbamidomethyl)			47280386	0	1.13895e-05	94.71	1.27501e-07	2	1100.06
TSETGIVDQVMVTLNQEGYK	UniProtKB:P30876				61624397	0	2.66207e-09	94.71	1.48055e-07	2	1106.55
VNPSRLPVVIGGLLDVDcSEDVIK	UniProtKB:Q00610	C18(Carbamidomethyl)			1724263369	0	5.87647e-07	94.7	5.97213e-08	3	865.472
TQDASGPELILPASIEFR	UniProtKB:P55196				59043208	0	1.16449e-06	94.69	1.11635e-07	2	972.506
VLISSLQDcLHGIESK	UniProtKB:Q16630	C9(Carbamidomethyl)			1668507581	0	1.48042e-07	94.66	9.52755e-08	2	899.978
LQELEAEQQQIQEER	UniProtKB:Q99996				0	0	8.45697e-06	94.66	1.47718e-07	2	935.959
LFVGNLPPDITEEEMR	UniProtKB:Q15233				229383864	0	3.66104e-06	94.63	1.3409e-07	2	930.468
MQEAMTQEVSDVFSDTTTPIK	UniProtKB:P18206				1.67553e+08	0	1.10085e-06	94.63	1.90047e-07	2	1179.55
TAMVAALSPADINYDETLSTLR	UniProtKB:O60333;UniProtKB:Q12756				1.40651e+07	0	2.37067e-07	94.62	1.32432e-07	2	1176.6
TVNELQNLTSAEVIVPR	UniProtKB:Q9Y6M1				5.06896e+07	0	1.99196e-07	94.6	5.85465e-08	2	942.022
GSLESPATDVFGSTEEGEK	UniProtKB:O00232				2.98342e+08	0	3.4496e-07	94.6	1.62013e-07	2	970.443
ERLEQQVPVNQVFGQDEMIDVIGVTK	UniProtKB:P39023				2468870702	0	9.6612e-11	94.59	1.07632e-07	3	991.185
VYATILNAGTNTDGFK	UniProtKB:P49327				156936391	0	1.01042e-05	94.58	1.18504e-07	2	842.934
ILVDNLcDMEMVNK	UniProtKB:O14974	C7(Carbamidomethyl)			323174048	0	8.34152e-06	94.57	1.51597e-07	2	847.401
ELEASEELDTIcPK	UniProtKB:O76003	C12(Carbamidomethyl)			807148618	0	2.61824e-05	94.56	1.47222e-07	2	817.388
aALTAEHFAALQSLLK	UniProtKB:Q9P000	N-Term(Acetyl)			8912584	0	3.85011e-09	94.56	6.40575e-08	2	863.479
SQAPGISLPGVLVGNK	UniProtKB:Q9BW83				1.69784e+08	0	4.2873e-06	94.55	3.79338e-08	2	768.945
GLHVVEVTYDDVPIPNSPFK	UniProtKB:O75369				1.61211e+08	0	8.92303e-08	94.55	1.17309e-07	2	1113.58
AIDDSSASISLAQLTK	UniProtKB:Q7Z6E9				21892788	0	1.19006e-06	94.51	9.88361e-08	2	810.433
EVVEcQSTSTVGGQSVK	UniProtKB:Q96T23	C5(Carbamidomethyl)			4.40149e+07	0	1.36659e-05	94.5	1.5649e-07	2	897.932
LLESLQENHFQEDEQFLGAVMPR	UniProtKB:P49903				133364462	0	2.36501e-11	94.5	1.8264e-07	3	910.78
KFVEEEDDDEEEEEENLDDQDEQGNLK	UniProtKB:Q7KZ85				73198754	0	4.40468e-07	94.47	2.11809e-07	3	1090.45
RNDDISELEDLSELEDLK	UniProtKB:Q9H4L7				200917791	0	2.61385e-06	94.46	1.70078e-07	3	711.68
DPNTYFIVGTAMVYPEEAEPK	UniProtKB:Q16531				4.55416e+07	0	1.71917e-06	94.44	1.92574e-07	2	1186.07
MLGETcADcGTILLQDK	UniProtKB:O60232	C6(Carbamidomethyl); C9(Carbamidomethyl)			89633312	0	1.12922e-07	94.42	1.74742e-07	2	962.948
LATGSDDNcAAFFEGPPFK	UniProtKB:O75083	C9(Carbamidomethyl)			2.38209e+07	0	3.529e-06	94.4	1.80196e-07	2	1022.45
YMTISGFQIEETIDR	UniProtKB:P08758				0	0	3.3494e-05	94.39	1.61524e-07	2	901.938
VPADTEVVcAPPTAYIDFAR	UniProtKB:P60174	C9(Carbamidomethyl)			5.78498e+09	0	5.06196e-10	94.36	1.69331e-07	2	1096.54
FIQQTYPSGGEEQAQYcR	UniProtKB:Q8WUM4	C17(Carbamidomethyl)			1.0519e+08	0	1.3469e-07	94.35	1.91703e-07	2	1081.49
TTYDSSLSSYTVPLEK	UniProtKB:Q8WWM7				169483876	0	3.4812e-06	94.31	1.5639e-07	2	895.942
FLTDLFAQLTDEATDEEK	UniProtKB:Q6IN85				2.94057e+07	0	5.89322e-07	94.25	1.71382e-07	2	1043.51
ILLLQNDPcLLPEVcLLYNK	UniProtKB:Q96H79	C9(Carbamidomethyl); C15(Carbamidomethyl)			5.98501e+07	0	4.43286e-06	94.24	5.7711e-08	2	1214.67
VVDLLNQAALITNDSK	UniProtKB:Q92797				203651874	0	5.37143e-05	94.21	8.17613e-08	2	857.471
TQEQLALEMAELTAR	UniProtKB:P26038				1106300552	0	2.09961e-05	94.2	1.31374e-07	2	852.438
mQQQLDEYQELLDIK	UniProtKB:P02545	M1(Oxidation)			1.14771e+08	0	6.99866e-06	94.2	1.65725e-07	2	955.468
QSGEAFVELGSEDDVK	UniProtKB:P52597				378700606	0	1.89982e-06	94.19	1.69365e-07	2	855.393
SASSGAEGDVSSEREP	UniProtKB:Q8TEA8				92061296	0	1.3183e-05	94.16	1.39478e-07	2	782.844
ELIQGGEYFSDEQMR	UniProtKB:Q96F63				27627043	0	2.74045e-05	94.16	1.72342e-07	2	901.405
mAEIGEHVAPSEAANSLEQAQAAAER	UniProtKB:P27708	M1(Oxidation)			102127598	0	5.55388e-07	94.14	2.18239e-07	3	899.43
LQAVEVVITHLAPGTK	UniProtKB:Q9Y2V2				1020996181	0	1.71231e-05	94.12	2.9935e-08	2	838.494
KIENcNYAVELGK	UniProtKB:Q14651	C5(Carbamidomethyl)			471467692	0	1.85595e-06	94.06	1.36326e-07	2	769.39
SNTSPEELGPLANQLTSDYGR	UniProtKB:Q9Y490				6.28824e+07	0	4.14748e-05	94.06	2.04568e-07	2	1125.03
LSSEMNTSTVNSAR	UniProtKB:P20700				6.62829e+08	0	4.04822e-05	94.04	1.45949e-07	2	748.861
aDLSLADALTEPSPDIEGEIKR	UniProtKB:P27816	N-Term(Acetyl)			421606328	0	2.41474e-07	94.03	1.2628e-07	2	1191.62
VNQIGSVTESIQAcK	UniProtKB:P13929	C14(Carbamidomethyl)			1.03503e+10	0	5.37143e-05	94	1.44732e-07	2	817.415
GSYGDLGGPIITTQVTIPK	UniProtKB:P61978				8413006828	0	9.12551e-07	94	8.34831e-08	2	959.023
cTGGEVGATSALAPK	UniProtKB:P30050	C1(Carbamidomethyl)			2.12335e+09	0	4.46925e-06	93.99	1.46422e-07	2	709.853
RQDLEDSLQAQQYFADANEAESWMR	UniProtKB:Q13813				217443772	0	1.59785e-08	93.95	2.66881e-07	3	1001.11
LALVHDMAEcIVGDIAPADNIPK	UniProtKB:Q7Z4H3	C10(Carbamidomethyl)			363303168	0	1.5375e-08	93.93	1.59079e-07	2	1231.63
EALENANTNTEVLK	UniProtKB:Q9H444				412623508	0	5.37143e-05	93.91	1.40365e-07	2	773.397
ATGYLELSNWPEVAPDPSVR	UniProtKB:O00203				36394090	0	6.87247e-06	93.91	1.80664e-07	2	1101.05
FQEHLQLQNLGINPANIGFSTLTMESDK	UniProtKB:Q00610				1.83568e+09	0	1.46406e-10	93.91	1.8674e-07	3	1049.19
EAYPEEAYIADLDAK	UniProtKB:P53396				521154036	0	1.00948e-05	93.9	1.74827e-07	2	849.401
IGLSVSEVIEGYEIAcR	UniProtKB:P50990	C16(Carbamidomethyl)			40020282	0	6.21774e-06	93.9	1.51362e-07	2	947.981
EQSQPcADNAVLSSGLTAAR	UniProtKB:P19784	C6(Carbamidomethyl)			6.43824e+07	0	2.11503e-06	93.89	1.98729e-07	2	1037.99
KEDLVFIFWAPESAPLK	UniProtKB:P23528;UniProtKB:Q9Y281				469851908	0	8.35388e-07	93.86	8.76571e-08	2	995.54
KAAAPAPEEEMDEcEQALAAEPK	UniProtKB:P26641	C14(Carbamidomethyl)			1024916782	0	5.90561e-09	93.86	2.41139e-07	3	829.047
DLGHPVEEEDELESGDQEDEDDESEDPGK	UniProtKB:O60763				43205805	0	4.25895e-09	93.85	2.06997e-07	3	1081.76
SGGGGGGGLGSGGSIR	UniProtKB:CON_P35527;UniProtKB:P35527				1.02069e+08	0	1.36076e-05	93.83	1.3575e-07	2	616.804
EIADLGEALATAVIPQWQK	UniProtKB:P49588				3.57522e+08	0	2.34102e-07	93.83	8.07713e-08	2	1027.06
cQEVISWLDANTLAEKDEFEHK	UniProtKB:P08107	C1(Carbamidomethyl)			6334474384	0	4.62294e-08	93.82	2.39719e-07	2	1331.63
GPVKPTGGPGGGGTQTQQQMNQLK	UniProtKB:P26196				6.02419e+08	0	2.62425e-06	93.81	1.57734e-07	3	789.404
LVQAAQMLQSDPYSVPAR	UniProtKB:P18206				33033365	0	5.55703e-06	93.78	1.2434e-07	2	987.519
mQNDAGEFVDLYVPR	UniProtKB:P63220	N-Term(Acetyl)			232535792	0	1.07861e-05	93.77	1.87129e-07	2	898.428
VMQQQQQTTQQQLPQK	UniProtKB:Q15459				4.37506e+08	0	1.78934e-07	93.77	1.47482e-07	2	971.497
RAAEDDEDDDVDTKK	UniProtKB:P06454				1865300590	0	5.37143e-05	93.7	1.80187e-07	3	574.593
ADTSLNNcEGAAGSTSEK	UniProtKB:O76080	C8(Carbamidomethyl)			2.49387e+07	0	7.01585e-06	93.69	1.70106e-07	2	906.388
ELQQELQEYEVVTESEK	UniProtKB:Q96A49				9.469e+07	0	2.97746e-07	93.69	1.99415e-07	2	1041
ISLDQIDLLSTK	UniProtKB:P49643				1.97418e+08	0	5.20189e-05	93.64	6.97645e-08	2	673.384
IcDFENASKPQSIQESTGSIIEVLSK	UniProtKB:P51659	C2(Carbamidomethyl)			6.02138e+08	0	1.13609e-09	93.59	1.79056e-07	3	960.82
LSDLVNTAILIALNKR	UniProtKB:Q8WUM0				1.98045e+08	0	2.90487e-07	93.58	1.49977e-08	3	585.358
LALQQDLTSMAPGLVIQAVR	UniProtKB:O94905				22048047	0	3.89316e-06	93.56	3.4958e-08	2	1062.61
TNLIVNYLPQNMTQDELR	UniProtKB:Q15717				785954891	0	1.08286e-06	93.56	1.66177e-07	2	1081.55
VLGILAMIDEGETDWK	UniProtKB:Q15181				5.85809e+08	0	1.98367e-06	93.55	1.36799e-07	2	895.468
AKVDEFPLcGHMVSDEYEQLSSEALEAAR	UniProtKB:P27635	C9(Carbamidomethyl)			10540734246	0	1.48112e-11	93.55	2.63816e-07	3	1094.52
NPELQNLLLDDFFK	UniProtKB:P52209				7.00188e+07	0	1.58056e-05	93.53	1.12033e-07	2	853.458
QIELAcDSQEDVDSWK	UniProtKB:P50570	C6(Carbamidomethyl)			4.38034e+07	0	1.12817e-06	93.53	2.0772e-07	2	961.923
NLITDIcTEQcTLSDQLLPK	UniProtKB:Q9Y2A7	C7(Carbamidomethyl); C11(Carbamidomethyl)			62859098	0	2.18391e-06	93.53	1.85672e-07	2	1181.59
GDAEKPEEELEEDDDEELDETLSER	UniProtKB:Q9NS69				1.48185e+08	0	2.28458e-06	93.53	2.57448e-07	3	974.409
aDLSLADALTEPSPDIEGEIK	UniProtKB:P27816	N-Term(Acetyl)			69544991	0	9.69494e-06	93.52	1.70827e-07	2	1113.57
GQIEEAGWSYVGGWTGQGGSK	UniProtKB:P08237				0	0	4.68379e-05	93.5	2.24257e-07	2	1077.52
LLNNAFEELVAFQR	UniProtKB:P25205				1327245424	0	1.50661e-05	93.48	1.27287e-07	2	832.442
mQNDAGEFVDLYVPR	UniProtKB:P63220	N-Term(Acetyl); M1(Oxidation)			28316381	0	1.50228e-06	93.46	2.02372e-07	2	906.418
VNVDIINFGEEEVNTEK	UniProtKB:A2A3N6;UniProtKB:P55036				3.92106e+08	0	8.08803e-08	93.46	1.95046e-07	2	974.981
LLGPDAAINLTDPDGALAK	UniProtKB:Q13561				1.06602e+09	0	1.13424e-06	93.44	8.49183e-08	2	933.013
AIQLNSNSVQALLLK	UniProtKB:Q9UJX3				66028205	0	9.45946e-06	93.38	3.59782e-08	2	806.477
sHQTGIQASEDVK	UniProtKB:Q12792	N-Term(Acetyl)			1.9696e+08	0	8.20276e-06	93.37	1.61757e-07	2	721.352
TQSSASLAASYAAQQHPQAAASYR	UniProtKB:Q96PK6				691875588	0	4.81905e-08	93.37	2.29622e-07	3	822.402
TVESEAASYLDQISR	UniProtKB:P61289				1163531623	0	1.29978e-05	93.36	1.88079e-07	2	834.91
YGIVDYMIEQSGPPSK	UniProtKB:P13667				3.48532e+08	0	3.01824e-05	93.36	1.96314e-07	2	892.431
WMQSELNVEEVVNDR	UniProtKB:Q4VC31				26657241	0	2.58318e-05	93.34	2.2074e-07	2	924.429
NVSSFPDDATSPLQENR	UniProtKB:P52292				451705536	0	3.24721e-05	93.33	2.17533e-07	2	938.941
TPAALAALSLTGSGTPPTAANYPSSSR	UniProtKB:Q9UQ35				203102092	0	1.45397e-07	93.33	1.48645e-07	3	853.779
TSRPENAIIYNNNEDFQVGQAK	UniProtKB:P29401				2002579682	0	8.29673e-08	93.31	2.30903e-07	3	836.744
sDEFSLADALPEHSPAK	UniProtKB:Q8NDC0	N-Term(Acetyl)			539579424	0	9.62416e-07	93.29	2.13005e-07	2	928.441
QITSYGETcPGLEQYAIK	UniProtKB:P50990	C9(Carbamidomethyl)			611691696	0	1.02101e-07	93.29	2.17014e-07	2	1029.5
LQDFNVGDYIEAVLDR	UniProtKB:P11216				3.22672e+07	0	1.68983e-06	93.28	1.81755e-07	2	933.971
LLDTNPEINQSDSQDSR	UniProtKB:Q14669				10836951	0	1.35246e-05	93.25	2.28437e-07	2	966.455
EELIAELQDcEGLIVR	UniProtKB:O43175	C10(Carbamidomethyl)			1.3054e+08	0	5.37143e-05	93.23	1.71168e-07	2	943.984
AFAFVTFADDQIAQSLcGEDLIIK	UniProtKB:Q13148	C17(Carbamidomethyl)			9.07943e+07	0	4.43049e-09	93.18	2.37823e-07	2	1336.66
MQEVYNFNAINNSEIR	UniProtKB:P09960				2.58695e+07	0	4.36099e-05	93.15	2.3066e-07	2	971.46
GTQGATAGASSELDASK	UniProtKB:O76094				1.52795e+08	0	1.80441e-06	93.11	1.94581e-07	2	775.871
EDLQPVQIQSLETLGVLAR	UniProtKB:Q8TEX9				106322368	0	3.08382e-07	93.1	7.71402e-08	2	1055.08
LcSVEQDLAMGSDAEGEK	UniProtKB:Q15833	C2(Carbamidomethyl)			1.93615e+07	0	3.25552e-06	93.09	2.32543e-07	2	969.929
ALINADELASDVAGAEALLDR	UniProtKB:Q13813				7.97983e+07	0	1.89085e-07	93.09	1.43124e-07	3	709.709
NFLYDIAGcSGTFTVQNR	UniProtKB:P49915	C9(Carbamidomethyl)			0	0	2.00413e-05	93.07	2.48806e-07	2	1031.98
IEDVGSDEEDDSGK	UniProtKB:P08238;UniProtKB:Q58FF8				3.36897e+07	0	4.94613e-06	93.05	1.43681e-07	2	747.809
TMLELLNQLDGFEATK	UniProtKB:P62195				1084387023	0	4.15021e-07	93.04	1.67302e-07	2	911.972
VGNPFELDTQQGPQVDK	UniProtKB:P30837				30628448	0	2.64772e-05	93.03	1.88767e-07	2	936.475
MENILSGNPLLNLTGPSQPQANFK	UniProtKB:Q9P013				12250586	0	4.97585e-08	93.03	1.66866e-07	2	1292.17
FGGNPGGFGNQGGFGNSR	UniProtKB:Q13148				780816300	0	1.63462e-07	93	2.14658e-07	2	863.886
VGLTNYAAAYcTGLLLAR	UniProtKB:P46777	C11(Carbamidomethyl)			239607528	0	8.26672e-06	92.99	1.44223e-07	2	964.01
NHSVNEEEQEEQGEGsEDEWEQVGPR	UniProtKB:Q14694	S16(Phospho)	1	S(3): 0.0; S(16): 100.0	7853034	0	2.44537e-06	92.99	2.71114e-07	3	1036.42
NSGELEATSAFLASGQR	UniProtKB:Q9NYB0				30519757	0	1.47881e-05	92.97	2.02117e-07	2	869.429
LcYVALDFENEmATAASSSSLEK	UniProtKB:P62736;UniProtKB:P68032;UniProtKB:P63267;UniProtKB:P68133	C2(Carbamidomethyl); M12(Oxidation)			103684851	0	6.83366e-07	92.97	2.91341e-07	2	1276.59
ELLTEFGYKGEETPVIVGSALcALEGR	UniProtKB:P49411	C22(Carbamidomethyl)			0	0	3.42166e-07	92.97	1.96843e-07	3	980.166
DLDQASLAAVSQQLAPR	UniProtKB:Q9Y490				142473455	0	1.07352e-06	92.95	1.14225e-07	2	891.985
VQAQLNTEQLLDDVVAK	UniProtKB:Q96QD9				3.76381e+07	0	1.73211e-07	92.95	1.09155e-07	2	942.514
AVQTLQMELQQIMK	UniProtKB:Q06210				375166224	0	5.37143e-05	92.94	1.3174e-07	2	830.946
VFGGMNEENMTELLSSGLK	UniProtKB:Q9UL63				22862972	0	3.32634e-06	92.88	2.49757e-07	2	1028.49
LYIGLAGLATDVQTVAQR	UniProtKB:P49720				153369440	0	1.70184e-07	92.85	7.88835e-08	2	945.029
SEGEGEAASADDGSLNTSGAGPK	UniProtKB:Q9NWV8				3.13464e+07	0	8.59571e-06	92.84	2.53134e-07	2	1053.96
AITDGQAGFGNDTLSK	UniProtKB:Q7Z739				110548170	0	2.81185e-06	92.83	2.05768e-07	2	797.889
ERYMEEMADTADAIEMATLDK	UniProtKB:Q14203				101597526	0	7.18535e-07	92.79	2.90046e-07	3	811.69
YYTSASGDEMVSLK	UniProtKB:P07900				1.64675e+09	0	5.37143e-05	92.78	2.10338e-07	2	775.859
AGTGVDNVDLEAATRK	UniProtKB:O43175				2151008030	0	7.41317e-06	92.78	1.80365e-07	2	808.919
YSLQSANASSLSSGQLK	UniProtKB:Q9H2P0				3.87786e+07	0	5.30456e-05	92.78	1.90541e-07	2	870.943
VEDPTFLNQLQSGVNR	UniProtKB:Q14204				47992624	0	3.67476e-06	92.78	2.033e-07	2	908.962
mLLDPMGGIVMTNDGNAILR	UniProtKB:P49368	M1(Oxidation)			320363713	0	6.81378e-08	92.77	2.16134e-07	2	1074.04
ATENDIYNFFSPLNPVR	UniProtKB:P31943;UniProtKB:P52597				6283016315	0	5.37143e-05	92.75	2.27962e-07	2	998.993
LEQGQAIDDLMPAQK	UniProtKB:P12277				6679038825	0	7.78925e-06	92.73	2.01787e-07	2	828.918
NLTEDNSQNQDLIAK	UniProtKB:Q9UBB4				2.973e+08	0	1.02167e-05	92.73	2.16774e-07	2	851.918
ALNALcDGLIDELNQALK	UniProtKB:P30084	C6(Carbamidomethyl)			527853676	0	2.47566e-07	92.71	1.26528e-07	2	986.031
LVHSLFESIMSTQESSNPNNVLK	UniProtKB:O15067				6.10633e+07	0	3.00988e-10	92.68	2.08413e-07	2	1287.65
LPLMEcVQMTQDVQK	UniProtKB:Q01813	C6(Carbamidomethyl)			23512202	0	8.95688e-08	92.66	2.34307e-07	2	910.448
VTASGPGLSSYGVPASLPVDFAIDAR	UniProtKB:O75369				137746729	0	1.56241e-10	92.66	1.71868e-07	2	1274.16
ALANVNIGSLIcNVGAGGPAPAAGAAPAGGPAPSTAAAPAEEK	UniProtKB:P05386	C12(Carbamidomethyl)			4.96279e+09	0	2.6398e-10	92.64	1.83879e-07	4	952.992
AQGTDNSDQSEIcK	UniProtKB:Q15643	C13(Carbamidomethyl)			1.1613e+07	0	2.16436e-05	92.63	1.89269e-07	2	776.835
QTDVLQQLSIQMANAK	UniProtKB:Q14204				1.66448e+08	0	1.61954e-07	92.63	1.61162e-07	2	894.473
sESLVVcDVAEDLVEK	UniProtKB:P60983	N-Term(Acetyl); C7(Carbamidomethyl)			6.12956e+08	0	5.81467e-06	92.63	2.30037e-07	2	917.45
SSTPPGESYFGVSSLQLK	UniProtKB:Q9UQ35				177877579	0	1.06849e-05	92.63	2.02804e-07	2	942.479
IEDVGsDEEDDSGK	UniProtKB:P08238;UniProtKB:Q58FF8	S6(Phospho)	1	S(6): 100.0; S(12): 0.0	7.20321e+08	0	4.93372e-05	92.56	1.06044e-07	2	787.795
NLTALGLNLVASGGTAK	UniProtKB:P31939				7.44094e+08	0	1.20628e-06	92.56	6.75257e-08	2	800.462
LSAVLEDTENWLYEDGEDQPK	UniProtKB:O95757				86341752	0	1.18022e-10	92.55	3.25593e-07	2	1226.06
LLDSSTVTHLFK	UniProtKB:P60900				1076654349	0	4.88876e-05	92.51	1.027e-07	2	680.883
LQcSLDAHEIcLQDIQLDPER	UniProtKB:Q06546	C3(Carbamidomethyl); C11(Carbamidomethyl)			126673837	0	5.16305e-08	92.5	2.91377e-07	3	851.747
YTFNEDEGELPEWFVQEEK	UniProtKB:Q8IY81				128068322	0	2.83202e-08	92.48	3.19641e-07	2	1195.02
VVIGMDVAASEFFR	UniProtKB:P06733				293246256	0	6.70208e-06	92.47	1.75364e-07	2	770.903
GcALQcAILSPAFK	UniProtKB:Q92598;UniProtKB:P34932;UniProtKB:O95757	C2(Carbamidomethyl); C6(Carbamidomethyl)			3330341792	0	1.43635e-05	92.46	1.9532e-07	2	768.392
VLVSPTNPPGATSScQK	UniProtKB:O60763	C15(Carbamidomethyl)			84073388	0	1.09044e-06	92.46	2.07296e-07	2	871.944
NLGSINTELQDVQR	UniProtKB:O75396				121134508	0	3.4884e-05	92.45	1.85986e-07	2	793.916
KIGYNPDTVAFVPISGWNGDNMLEPSANMPWFK	UniProtKB:P68104;UniProtKB:Q5VTE0				6.57809e+08	0	1.94808e-10	92.44	2.42291e-07	3	1232.62
KLTQIQESQVTSHNK	UniProtKB:Q92541				6.50028e+07	0	2.20731e-07	92.43	1.42412e-07	3	580.982
DLEEALEAGGcDLETLR	UniProtKB:Q9NUY8	C11(Carbamidomethyl)			8.3155e+07	0	1.62716e-06	92.43	2.68681e-07	2	945.94
SAGAETDNAVPQGSK	UniProtKB:Q9BRX5				5.02833e+07	0	2.19697e-06	92.37	2.28585e-07	2	716.343
IEFGVDEVIEPSDTLPR	UniProtKB:Q14694				69197494	0	6.05763e-06	92.35	1.96605e-07	2	958.495
EDAAGTSGLGELNSR	UniProtKB:Q5T3I0				7.80653e+07	0	1.80587e-05	92.34	2.30928e-07	2	738.853
DLISHDEMFSDIYK	UniProtKB:P13693				3.3147e+09	0	2.81704e-08	92.33	2.59471e-07	2	856.899
TMLELLNQLDGFQPNTQVK	UniProtKB:P17980				977538623	0	1.55255e-07	92.33	1.53478e-07	2	1095.08
SLYQSAGVAPESFEYIEAHGTGTK	UniProtKB:P49327				2602103122	0	5.07036e-06	92.33	3.08477e-07	2	1271.61
GSNTIASAAADKIPGLLGVFQK	UniProtKB:P55060				6.02659e+08	0	1.06839e-05	92.32	8.42867e-08	2	1079.6
GQESAGIVTSDGSSVPTFK	UniProtKB:Q06203				239338589	0	3.01133e-09	92.31	2.44924e-07	2	933.964
SQLScVVVDDIER	UniProtKB:P46459	C5(Carbamidomethyl)			332565662	0	5.37143e-05	92.3	2.21641e-07	2	760.379
LYPAAVDTIVAIMAEGK	UniProtKB:Q9ULC4				3.89482e+07	0	3.9827e-06	92.3	1.05521e-07	3	587.995
VAAALENTHLLEVVNQcLSAR	UniProtKB:Q9Y3D0	C17(Carbamidomethyl)			125024633	0	3.27216e-10	92.29	1.55016e-07	3	770.078
LQNGLQALLISDLSNMEGK	UniProtKB:O43847				101040305	0	8.84658e-08	92.28	1.03464e-07	2	1022.56
GVESVFDIMEMEDEER	UniProtKB:O75643				92163197	0	1.07418e-06	92.27	2.71085e-07	2	957.911
YIAENGTDPINNQPLSEEQLIDIK	UniProtKB:Q9UMS4				656244447	0	3.41771e-08	92.27	2.31567e-07	2	1357.69
GPAAAQGSAAAPAEPK	UniProtKB:Q9UHD9				140508359	0	1.24124e-05	92.26	1.83725e-07	2	697.361
VVLDVGSGTGILcMFAAK	UniProtKB:Q99873	C13(Carbamidomethyl)			212701825	0	5.37143e-05	92.23	1.73539e-07	2	919.486
aDVLDLHEAGGEDFAmDEDGDESIHK	UniProtKB:Q9Y5S9	N-Term(Acetyl); M16(Oxidation)			1.20084e+08	0	5.904e-08	92.23	3.60423e-07	3	958.408
aEPQPPSGGLTDEAALSccSDADPSTK	UniProtKB:Q04760	N-Term(Acetyl); C18(Carbamidomethyl); C19(Carbamidomethyl)			744600531	0	1.00855e-07	92.21	3.76335e-07	2	1402.11
LYSENEGMASNQGK	UniProtKB:Q96EI5				6.53188e+07	0	1.71946e-05	92.2	2.21682e-07	2	764.339
EGGWDSVQDWMDVLSGGEK	UniProtKB:P28288				1.00042e+07	0	3.47599e-06	92.2	2.96188e-07	2	1047.96
IELLcQDQVLDPNMDLR	UniProtKB:Q8TAF3	C5(Carbamidomethyl)			152834468	0	5.37143e-05	92.19	2.52964e-07	2	1036.52
FAIQDISVEETSAK	UniProtKB:P12814;UniProtKB:O43707;UniProtKB:P35609;UniProtKB:Q08043				586378538	0	2.36474e-05	92.17	2.04743e-07	2	769.393
LTAIDILTTcAADIQR	UniProtKB:O75643	C10(Carbamidomethyl)			7.69286e+08	0	3.45193e-06	92.17	1.70099e-07	2	887.974
GESLADSVQTMScYADVVVLR	UniProtKB:P27708	C13(Carbamidomethyl)			0	0	9.73907e-08	92.15	3.14704e-07	2	1150.55
ASEWVQQVSGLMDGK	UniProtKB:P49588				607663315	0	3.28235e-05	92.12	2.53975e-07	2	817.897
NDLSIcGTLHSVDQYLNIK	UniProtKB:Q9Y333	C6(Carbamidomethyl)			366959725	0	4.30412e-09	92.09	2.60525e-07	2	1095.55
NGSEADIDEGLYSR	UniProtKB:P22314				509370050	0	1.39835e-05	92.01	2.35656e-07	2	763.344
KDcEVVMMIGLPGAGK	UniProtKB:Q00839	C3(Carbamidomethyl)			416672862	0	1.96194e-07	91.99	2.23178e-07	2	852.937
AQHIVPcTISQLLSATLVDEVFR	UniProtKB:P15927	C7(Carbamidomethyl)			448293392	0	4.13206e-09	91.98	1.05381e-07	3	866.476
ELLENPVQPINDMSYFGcLDSVMENSK	UniProtKB:Q9Y490	C18(Carbamidomethyl)			82364060	0	4.4085e-09	91.96	4.20158e-07	3	1043.81
EDFATFDYILcMDESNLR	UniProtKB:P24666	C11(Carbamidomethyl)			1.13695e+08	0	3.66261e-07	91.93	3.58917e-07	2	1120
ALTVPELTQQMFDSK	UniProtKB:Q13885;UniProtKB:Q9BVA1				960659550	0	1.10258e-05	91.91	2.35927e-07	2	854.436
INPDGSQSVVEVPYAR	UniProtKB:Q9Y2B0				438790234	0	2.53035e-05	91.91	2.3612e-07	2	865.942
GPSGcVESLEVTcR	UniProtKB:P47897	C5(Carbamidomethyl); C13(Carbamidomethyl)			1.19941e+08	0	7.77778e-06	91.88	2.53e-07	2	775.854
DISEASVFDAYVLPK	UniProtKB:P62854				2.42317e+09	0	8.35041e-06	91.88	2.17811e-07	2	827.426
FEALAAHDALVELSGAMNTTAcSLMK	UniProtKB:P07954	C22(Carbamidomethyl)			19045308	0	3.51377e-08	91.88	3.42447e-07	3	917.779
ILAIGLINEALDEGDAQK	UniProtKB:P46940				3.01123e+08	0	2.1243e-07	91.87	1.20534e-07	2	942.018
QAQVATGGGPGAPPGSQPDYSAAWAEYYR	UniProtKB:Q92945				3.16005e+08	0	2.50737e-05	91.86	4.03749e-07	2	1476.69
aEEGIAAGGVmDVNTALQEVLK	UniProtKB:P25398	N-Term(Acetyl); M11(Oxidation)			429991469	0	1.03679e-08	91.84	2.20351e-07	2	1137.09
SPASDTYIVFGEAK	UniProtKB:Q13765				3945598781	0	1.01635e-06	91.83	2.32932e-07	2	742.87
DVQIGDIVTVGEcRPLSK	UniProtKB:P62280	C13(Carbamidomethyl)			3.35041e+09	0	9.39147e-07	91.78	2.11701e-07	2	993.519
DQVAIHEAMEQQTISITK	UniProtKB:Q14566				3.44048e+08	0	3.87023e-06	91.77	2.70101e-07	3	681.346
LIPLLLSSLNDEVPEVR	UniProtKB:Q86Y56				55472341	0	3.23837e-07	91.75	4.10363e-08	2	954.058
AFLDALQNQAEASSK	UniProtKB:Q12931				369773125	0	4.23729e-06	91.72	2.47756e-07	2	796.903
LAQANGWGVMVSHR	UniProtKB:P06733				2.30801e+09	0	1.19083e-05	91.69	2.18065e-07	2	763.393
AAVDAGFVPNDMQVGQTGK	UniProtKB:P13804				2.89852e+08	0	3.20821e-06	91.69	3.03278e-07	2	952.965
LTLAELNQILYR	UniProtKB:P35573				372058131	0	5.37143e-05	91.67	7.03916e-08	2	723.924
GPDGLTAFEATDNQAIK	UniProtKB:P58546				1389746373	0	3.53063e-08	91.63	2.92348e-07	2	874.428
EFQDAGEQVVSSPADVAEK	UniProtKB:P31937				2.26782e+07	0	7.97534e-06	91.63	3.2835e-07	2	1003.48
NGVQAMVEFDSVQSAQR	UniProtKB:P14866				1.56732e+08	0	1.23847e-05	91.61	3.19961e-07	2	933.437
DILQScQTSEEcELAR	UniProtKB:Q9UNW1	C6(Carbamidomethyl); C12(Carbamidomethyl)			2.37173e+07	0	8.89881e-07	91.61	3.30763e-07	2	969.934
AGGDATDSSQTALDNK	UniProtKB:O75122				5.60617e+07	0	1.92051e-05	91.59	2.6683e-07	2	775.85
LNFSTPTSTNIVSVcR	UniProtKB:O15067	C15(Carbamidomethyl)			2.44685e+08	0	2.32899e-06	91.59	2.25675e-07	2	898.464
EVENLILENTQLLETK	UniProtKB:O60271				214974307	0	1.05466e-06	91.58	1.57562e-07	2	943.512
EGIAMDQLLSQSLPNDGDEK	UniProtKB:Q9BRP1				78708995	0	4.50531e-07	91.54	3.49851e-07	2	1080.51
EAAGEGPALYEDPPDQK	UniProtKB:P27695				638715191	0	8.67794e-09	91.5	3.26151e-07	2	893.915
AEQLGAEGNVDESQK	UniProtKB:Q9NQ29				1.10237e+08	0	2.55875e-06	91.49	2.96781e-07	2	787.87
LLSDFLDSEVSELR	UniProtKB:Q9BPX3				727093480	0	3.95042e-05	91.47	2.32176e-07	2	811.92
IALLQSLLDDANLR	UniProtKB:Q86VS8				28562552	0	4.83961e-05	91.46	9.57782e-08	2	777.945
MVSDINNAWGcLEQVEK	UniProtKB:P12814	C11(Carbamidomethyl)			1.45693e+08	0	4.72096e-07	91.46	3.50853e-07	2	996.957
DELHIVEAEAMNYEGSPIK	UniProtKB:P06748				7291108497	0	1.67665e-09	91.46	3.53354e-07	2	1073.01
aATASAGAGGIDGKPR	UniProtKB:Q02978	N-Term(Acetyl)			2.26636e+08	0	1.46834e-05	91.45	1.99732e-07	2	721.38
ISFPAIQAAPSFSNSFPQIFR	UniProtKB:P23381				215717496	0	1.54706e-07	91.45	1.95185e-07	2	1163.11
EQLDSSNSTIAILQTEK	UniProtKB:O60763				70013371	0	4.59477e-06	91.43	2.55908e-07	2	938.981
VcIESEHSMDTLLATLK	UniProtKB:O00244	C2(Carbamidomethyl)			8.40086e+08	0	9.83673e-09	91.4	3.06473e-07	2	973.984
LcEAIcPAQAITIEAEPR	UniProtKB:O00217	C2(Carbamidomethyl); C6(Carbamidomethyl)			4.02565e+07	0	1.41269e-05	91.39	3.09938e-07	2	1021.51
IGPILDNSTLQSEVKPILEK	UniProtKB:P30153				1659680964	0	2.32477e-09	91.37	6.52135e-08	2	1097.63
EIFLSQPILLELEAPLK	UniProtKB:P62140;UniProtKB:P62136;UniProtKB:P36873				263625504	0	1.15723e-05	91.33	3.05158e-08	2	977.082
MNAQETATGMAFEEPIDEK	UniProtKB:O43719				151902910	0	6.31904e-07	91.26	3.6982e-07	2	1056.47
GNFGGSFAGSFGGAGGHAPGVAR	UniProtKB:P52272				2724378860	0	1.48392e-05	91.22	3.71241e-07	2	1017.98
GVGVFGDMAQDTGIPADIWR	UniProtKB:P56192				7.33682e+07	0	2.1977e-05	91.21	3.28503e-07	2	1053.02
YHEQLSTQSLIELFESFK	UniProtKB:Q00610				1.15672e+08	0	1.04297e-05	91.2	2.68688e-07	3	733.713
KDLYANTVLSGGTTMYPGIADR	UniProtKB:CON_P60712;UniProtKB:P63261				123836496	0	2.65394e-09	91.19	3.1679e-07	3	781.728
AVDDFLISLDGTANK	UniProtKB:CON_P00924				4.21963e+07	0	2.69231e-05	91.18	2.5663e-07	2	789.903
IPSAVGYQPTLATDMGTMQER	UniProtKB:P06576				4.55601e+08	0	9.24114e-07	91.18	3.73114e-07	2	1133.55
NDFQLIGIQDGYLSLLQDSGEVR	UniProtKB:P63241				34136650	0	7.70345e-06	91.17	2.88577e-07	2	1290.66
LMATQMTAAGLGPGVEQTK	UniProtKB:Q92797				1.89237e+07	0	1.47935e-05	91.16	2.7305e-07	2	952.49
VRTDITYPAGFMDVISIDK	UniProtKB:P62701				471852296	0	1.36124e-06	91.16	2.58848e-07	2	1071.06
TTQVPQFILDDFIQNDR	UniProtKB:Q08211				1.36211e+09	0	6.51351e-07	91.13	3.03119e-07	2	1025.52
VDNSSLTGESEPQTR	UniProtKB:P05023;UniProtKB:P50993;UniProtKB:P13637;UniProtKB:P20648				486666962	0	4.09428e-05	91.12	3.25878e-07	2	810.383
GcITIIGGGDTATccAK	UniProtKB:P00558	C2(Carbamidomethyl); C14(Carbamidomethyl); C15(Carbamidomethyl)			2361319008	0	3.97081e-06	91.12	3.48479e-07	2	877.899
LYPELSQYMGLSLNEEEIR	UniProtKB:O00560				5.57702e+07	0	3.3377e-08	91.12	3.6119e-07	2	1142.56
FAELETILGDIDR	UniProtKB:Q9BZJ0				136091230	0	5.33538e-05	91.11	2.27924e-07	2	746.392
MVGGIAQIIAAQEEMLR	UniProtKB:Q9Y490				0	0	3.07971e-06	91.1	2.09548e-07	2	915.488
IQEIIEQLDVTTSEYEK	UniProtKB:P10809				2.70468e+07	0	8.44398e-06	91.09	3.29693e-07	2	1019.51
LLLAGYDDFNcNVWDALK	UniProtKB:P62873	C11(Carbamidomethyl)			3.49822e+08	0	2.36565e-08	91.09	3.43814e-07	2	1064.03
INEELESQYQQSMDSK	UniProtKB:O00193				258403034	0	1.13517e-06	91.08	3.83053e-07	2	964.938
GPNQPVESDESLGGLSAALR	UniProtKB:P51617				28844737	0	7.39532e-06	91.08	3.0429e-07	2	999.003
VMFSSFGQIEEcR	UniProtKB:Q92879	C12(Carbamidomethyl)			9.11696e+07	0	5.37143e-05	91.06	3.02482e-07	2	795.354
SEDPDQQYLILNTAR	UniProtKB:Q96QK1				271209878	0	7.24411e-07	91.06	3.16192e-07	2	881.939
APPSVFAEVPQAQPVLVFK	UniProtKB:P17174				1.7584e+08	0	2.09942e-06	91.06	1.14067e-07	2	1012.57
LILPVGPAGGNQMLEQYDK	UniProtKB:P22061				1134312283	0	5.86136e-06	91.04	2.33635e-07	2	1022.04
LNDMASTDDGTLQSR	UniProtKB:Q9H6Z4				120906754	0	1.06522e-05	91.03	3.23354e-07	2	812.368
IEVGDVNPSETQYISEPK	UniProtKB:Q86UV5				8203524	0	2.18304e-05	91.02	3.55212e-07	2	1002.99
sGALDVLQMKEEDVLK	UniProtKB:P08865	N-Term(Acetyl)			6059151977	0	3.09109e-06	91	2.58514e-07	2	908.976
LAASGEGGLQELSGHFENQK	UniProtKB:Q16643				1.33559e+09	0	6.49257e-07	91	3.42435e-07	2	1036.51
ESTGAQVQVAGDMLPNSTER	UniProtKB:Q15365;UniProtKB:Q15366;UniProtKB:P57721				1691391316	0	9.49643e-09	91	3.84296e-07	2	1045.5
ILLELLNQMDGFDQNVNVK	UniProtKB:P43686				3.03902e+08	0	1.38933e-08	90.99	2.27224e-07	2	1102.08
EGVILTNESAASTGQPDNDVTEGQR	UniProtKB:Q08J23				130133727	0	5.37143e-05	90.96	4.18155e-07	2	1294.63
AFYNNVLGEYEEYITK	UniProtKB:P04181				379215920	0	1.15225e-05	90.9	3.69757e-07	2	976.972
WTSQDSLLGMEFSGR	UniProtKB:P49327				789560964	0	3.83953e-06	90.88	3.58398e-07	2	857.398
YSGAYGASVSDEELK	UniProtKB:Q9NX63				283493124	0	2.79904e-07	90.87	3.30783e-07	2	788.364
TSESLcQNNMVILK	UniProtKB:O14980	C6(Carbamidomethyl)			4.37776e+08	0	3.99009e-05	90.87	3.13554e-07	2	818.91
cDQDAQNPLSAGLQGAcLMETVELLQAK	UniProtKB:Q13561	C1(Carbamidomethyl); C17(Carbamidomethyl)			18516220	0	3.04266e-08	90.85	4.55646e-07	3	1020.83
ISNQVDLSNVcAQYR	UniProtKB:O75694	C11(Carbamidomethyl)			147678773	0	1.04289e-06	90.84	3.54709e-07	2	883.929
EKPSYDTETDPSEGLMNVLK	UniProtKB:Q9HB71				776191397	0	6.87852e-06	90.83	4.11078e-07	2	1127.04
HILGFDTGDAVLNEAAQILR	UniProtKB:Q9Y224				9.0366e+08	0	4.08925e-08	90.82	1.54825e-07	2	1077.09
TGEMSGPVFTDSGIHIILR	UniProtKB:Q13526				1.31548e+08	0	3.47809e-07	90.79	2.55357e-07	2	1015.53
AAcSAAAMEEDSEASSSR	UniProtKB:Q05086	C3(Carbamidomethyl)			1.67258e+07	0	9.27338e-06	90.77	3.00003e-07	2	915.374
TDMDNQIVVSDYAQMDR	UniProtKB:P50991				4.09215e+08	0	1.91068e-06	90.77	4.04066e-07	2	1000.94
QFASQANVVGPWIQTK	UniProtKB:O43707				301269972	0	8.08963e-06	90.75	2.49894e-07	2	887.468
FIFDcVSQEYGINPER	UniProtKB:A6NDG6	C5(Carbamidomethyl)			13401373	0	2.39766e-05	90.73	4.20357e-07	2	987.444
NIELIcQENEGENDPVLQR	UniProtKB:Q15691	C6(Carbamidomethyl)			1519979751	0	2.13855e-06	90.69	4.48219e-07	2	1135.54
ILDSVGIEADDDRLNK	UniProtKB:P05387				12488095303	0	1.78336e-05	90.66	2.88671e-07	2	886.96
IIYLNQLLQEDSLNVADLTSLR	UniProtKB:Q9UL46				5.05535e+08	0	3.33832e-07	90.65	1.04955e-07	2	1266.2
FDENDVITcFANFESDEVELSYAK	UniProtKB:Q00839	C9(Carbamidomethyl)			7.59339e+07	0	2.16957e-06	90.65	5.42125e-07	2	1421.65
NVSATLVNISPDTSLLLDcGEGTFGQLcR	UniProtKB:Q9BQ52	C19(Carbamidomethyl); C28(Carbamidomethyl)			81370030	0	1.66863e-05	90.65	4.76689e-07	3	1046.5
VLLQNTSFFSSLLNEMAHK	UniProtKB:Q9UI26				271132682	0	5.71331e-07	90.61	1.84698e-07	3	727.063
VNVAGLVLAGSADFK	UniProtKB:P62495				46904746	0	8.55716e-06	90.59	1.47139e-07	2	730.913
LLSEEVFDFSSGQITQVK	UniProtKB:O14980				4.39882e+08	0	5.55688e-06	90.59	2.81839e-07	2	1014.03
VSALDLAVLDQVEAR	UniProtKB:Q13561				555801669	0	2.55068e-06	90.57	1.77198e-07	2	799.943
ILDDDTIITTLENLK	UniProtKB:Q14204				2.89029e+08	0	5.53876e-06	90.56	2.04065e-07	2	858.967
TGQEYKPGNPPAEIGQNISSNSSASILESK	UniProtKB:P07814				156373135	0	3.59746e-10	90.56	3.96747e-07	3	1035.19
YLcAGAVDFYNNLENFNVDK	UniProtKB:P13807	C3(Carbamidomethyl)			1.80484e+07	0	1.55194e-09	90.55	4.92242e-07	2	1183.54
GFDVFNALDLMENK	UniProtKB:O60551;UniProtKB:P30419				5.72497e+08	0	2.17893e-05	90.54	3.51377e-07	2	806.896
VNNTFSEcLNLINEGcPK	UniProtKB:Q8WWK9	C8(Carbamidomethyl); C16(Carbamidomethyl)			1.06065e+07	0	2.20118e-05	90.52	4.28718e-07	2	1055
GmYGIENEVFLSLPcILNAR	UniProtKB:P07195	M2(Oxidation); C15(Carbamidomethyl)			2.54424e+07	0	2.3616e-05	90.51	3.95117e-07	2	1156.57
IDLPAENSNSETIIITGK	UniProtKB:Q00341				8.021e+07	0	4.79281e-07	90.49	2.33867e-07	2	958.01
TAAPTVcLLVLSQAEK	UniProtKB:Q9NVI1	C7(Carbamidomethyl)			7.72768e+07	0	3.48231e-06	90.45	1.60299e-07	2	850.976
GYSYDLEVEQAYDLAR	UniProtKB:P28074				5.77322e+07	0	5.83717e-07	90.45	4.18104e-07	2	946.438
HLMLPDFDLLEDIESK	UniProtKB:P13010				3.61065e+08	0	9.34443e-10	90.44	3.10132e-07	2	957.993
VLDNYLTSPLPEEVDETSAEDEGVSQR	UniProtKB:O00299				3.07257e+08	0	5.84453e-08	90.43	5.62732e-07	3	998.136
ANEAMAIDTLLISDELFR	UniProtKB:Q9BRX2				64209263	0	1.99043e-06	90.41	2.70381e-07	2	1011.53
DYEFMWNPHLGYILTcPSNLGTGLR	UniProtKB:P12277	C16(Carbamidomethyl)			1.50485e+09	0	2.47711e-10	90.4	4.58422e-07	3	985.485
ESLQDTQPVGVLVDccK	UniProtKB:Q9H0A0	C15(Carbamidomethyl); C16(Carbamidomethyl)			95617167	0	2.98905e-06	90.37	4.50396e-07	2	974.458
HLNEIDLFHcIDPNDSK	UniProtKB:Q15185	C10(Carbamidomethyl)			3144073730	0	1.13515e-08	90.37	4.55217e-07	2	1033.98
LcASGAGATPDTAIEEIK	UniProtKB:P53384	C2(Carbamidomethyl)			88002505	0	1.3163e-06	90.36	3.76924e-07	2	902.448
ASLLDDYQLPEILR	UniProtKB:Q9H2U1				156787456	0	5.37143e-05	90.33	2.15164e-07	2	823.45
VIGNQSLVNELAFTAR	UniProtKB:Q13011				5.07364e+07	0	3.0642e-05	90.31	1.63549e-07	2	866.482
GEDVPLTEQTVSQVLQSAK	UniProtKB:P61923				59329503	0	4.00264e-07	90.3	2.77643e-07	2	1015.03
GAEAANVTGPGGVPVQGSK	UniProtKB:P67809				3195691105	0	5.37143e-05	90.29	3.06766e-07	2	848.438
VYVGNLGNNGNKTELER	UniProtKB:P84103				8.14035e+08	0	4.84909e-06	90.29	3.22808e-07	2	938.984
sDAAVDTSSEITTK	UniProtKB:P06454	N-Term(Acetyl)			8278479088	0	1.22322e-05	90.28	3.62555e-07	2	733.849
QAVDQISSGFFSPK	UniProtKB:P11216				60178685	0	1.86093e-05	90.28	3.19334e-07	2	755.883
FELAcLANLcPETAEESK	UniProtKB:O15514	C5(Carbamidomethyl); C10(Carbamidomethyl)			46731683	0	1.42953e-05	90.27	4.80621e-07	2	1041.47
NYMSNPSYNYEIVNR	UniProtKB:Q14204				128339239	0	1.91973e-05	90.25	4.39696e-07	2	932.422
FMTPVIQDNPSGWGPcAVPEQFR	UniProtKB:O15371	C16(Carbamidomethyl)			160829722	0	1.88774e-06	90.2	5.58145e-07	2	1317.12
SSEGSLGGQNSGIGGR	UniProtKB:Q9UGP4				40104633	0	2.79486e-06	90.18	3.64524e-07	2	731.85
IcEQFEAETPTDSETTQK	UniProtKB:P40855	C2(Carbamidomethyl)			1.046e+08	0	4.22112e-05	90.17	4.82008e-07	2	1057.47
EQIQMDDYGLcQccK	UniProtKB:Q92990	C11(Carbamidomethyl); C13(Carbamidomethyl); C14(Carbamidomethyl)			32738249	0	2.84387e-05	90.16	3.2775e-07	2	974.386
MATEVAADALGEEWK	UniProtKB:P62753				2.73701e+08	0	5.3889e-06	90.14	4.07306e-07	2	810.883
HSQFIGYPITLYLEK	UniProtKB:P08238;UniProtKB:Q58FF7				4019911628	0	4.06419e-06	90.11	2.49792e-07	2	904.984
GAQVEEIWSLEPENFEK	UniProtKB:Q9Y5K5				1.2988e+08	0	5.37143e-05	90.1	4.79139e-07	2	1002.98
TVEEIEAcMAGcDK	UniProtKB:P12955	C8(Carbamidomethyl); C12(Carbamidomethyl)			97563996	0	4.73759e-06	90.08	3.15436e-07	2	806.835
VLATAFDTTLGGR	UniProtKB:P34932				1138958083	0	4.85299e-05	90.07	2.09447e-07	2	661.362
QIFETIYYGALEAScDLAK	UniProtKB:P23921	C15(Carbamidomethyl)			4.69904e+07	0	5.19524e-08	90.06	4.26862e-07	2	1096.55
KYDAFLASESLIK	UniProtKB:P62906				1.11426e+09	0	2.98607e-05	90.03	2.23948e-07	2	742.907
QGVQVQVSTSNISSLEGAR	UniProtKB:P49327				30467725	0	1.17234e-06	90.03	2.98481e-07	2	980.515
QDLPNAMAISEMTDK	UniProtKB:P18085				631441006	0	2.55735e-05	90.02	4.224e-07	2	832.388
NEcDPALALLSDYVLHNSNTMR	UniProtKB:Q13200	C3(Carbamidomethyl)			1103720435	0	3.91149e-07	90	5.466e-07	3	845.068
LLAQLDPSLVAFLR	UniProtKB:Q9BWH6				7.08321e+07	0	5.37143e-05	89.97	6.58533e-08	2	778.466
KNSVVEASEAAYK	UniProtKB:Q04917				257271019	0	3.6023e-05	89.95	3.09493e-07	2	698.362
VDEFVTHNLSFDEINK	UniProtKB:P11766				472324608	0	4.00043e-05	89.92	4.65955e-07	2	953.963
DVAWAPSIGLPTSTIAScSQDGR	UniProtKB:P55735	C18(Carbamidomethyl)			2.90536e+08	0	1.10598e-07	89.92	4.95086e-07	2	1195.08
ITDLANLSAANHDAAIFPGGFGAAK	UniProtKB:P30042				4.40595e+08	0	1.29289e-12	89.92	3.70869e-07	3	814.754
TTEPGVTGLLLAVEGPAAK	UniProtKB:Q14690				112687894	0	2.34411e-05	89.9	1.47457e-07	2	912.513
IIVDELKQEVISTSSK	UniProtKB:P63244				8.46746e+08	0	4.70285e-07	89.89	1.29027e-07	2	895.009
EVMQEVAQLSQFDEELYK	UniProtKB:P49591				5.68935e+08	0	1.52844e-07	89.89	5.09852e-07	2	1093.53
SQFEELcAELLQK	UniProtKB:Q92598	C7(Carbamidomethyl)			1039876528	0	5.37143e-05	89.88	4.00618e-07	2	797.893
ELAQQVQQVAAEYcR	UniProtKB:P17844	C14(Carbamidomethyl)			8.83383e+08	0	2.03022e-06	89.88	4.70729e-07	2	896.935
EELNAISGPNEFAEFYNR	UniProtKB:Q12874				336430589	0	2.28862e-07	89.86	5.233e-07	2	1050.49
QWLIDTLYAFNSGNVER	UniProtKB:Q9UNM6				351967792	0	5.44763e-06	89.85	4.15454e-07	2	1013.51
ASPFLLQYIQEEIPDYR	UniProtKB:O60256				2.31579e+07	0	9.94943e-07	89.85	3.41597e-07	2	1041.54
DWEDDsDEDmSNFDR	UniProtKB:Q15185	S6(Phospho); M10(Oxidation)	1	S(6): 100.0; S(11): 0.0	5.15046e+07	0	4.40889e-05	89.84	1.13869e-07	2	986.324
IGGDAGTSLNSNDYGYGGQK	UniProtKB:Q96AE4				589721222	0	5.21204e-05	89.83	5.16528e-07	2	987.452
DASVAEAWLLGQEPYLSSR	UniProtKB:Q01082				147124804	0	8.84752e-06	89.82	4.52522e-07	2	1046.52
TEQDLALGTDAEGQK	UniProtKB:O00186				3.68702e+07	0	1.58571e-05	89.79	4.11945e-07	2	788.388
mIAGQVLDINLAAEPK	UniProtKB:P07910	M1(Oxidation)			1581924848	0	3.50168e-06	89.75	2.49084e-07	2	849.961
VAHALAEGLGVIAcIGEK	UniProtKB:P60174	C14(Carbamidomethyl)			2.06989e+09	0	1.97905e-07	89.75	1.83886e-07	2	904.5
cGETGHVAINcSK	UniProtKB:P62633	C1(Carbamidomethyl); C11(Carbamidomethyl)			4.32458e+07	0	1.74304e-05	89.72	3.76828e-07	2	716.821
WEAAEGLLQEALDK	UniProtKB:O14579				1023007960	0	2.16775e-06	89.72	3.80295e-07	2	786.899
QSAQLTALAAQQQAAGKEEK	UniProtKB:Q96A49				3.97983e+08	0	2.23831e-07	89.68	2.8085e-07	3	691.037
ITESDLSQLTASIR	UniProtKB:Q14315				2.87409e+07	0	2.51093e-05	89.66	2.53434e-07	2	767.416
QFLQAAEAIDDIPFGITSNSDVFSK	UniProtKB:P07237				650312684	0	6.29764e-06	89.65	4.18179e-07	3	905.129
GFGFVTFDDHDPVDK	UniProtKB:P22626				9.08708e+09	0	2.70919e-06	89.64	4.64121e-07	2	848.387
ELTTEIDNNIEQISSYK	UniProtKB:CON_P13645;UniProtKB:P13645				0	0	2.26505e-06	89.64	4.72812e-07	2	998.992
mDNYADLSDTELTTLLR	UniProtKB:P50402	N-Term(Acetyl)			33143081	0	1.25973e-05	89.59	4.73617e-07	2	1006.99
VGAEELTADQNLK	UniProtKB:P56182				156708800	0	5.00012e-05	89.58	3.4726e-07	2	694.36
LLQAGEENQVLELLIHR	UniProtKB:Q9NPJ6				230145512	0	1.68515e-06	89.58	1.24915e-07	3	659.043
IMcEILSSLQIGDFLVK	UniProtKB:P12081	C3(Carbamidomethyl)			168914076	0	2.59045e-05	89.55	2.40691e-07	2	983.534
ETSVTPSNLWGGQGLLGVSIR	UniProtKB:Q9H8Y8				1.43508e+08	0	1.11384e-07	89.55	2.26937e-07	2	1086.09
SLEAEILQLQEELASSER	UniProtKB:P35580				243115614	0	1.23414e-05	89.51	3.47865e-07	3	682.359
TVLLSLQALLAAAEPDDPQDAVVANQYK	UniProtKB:P61086				9.06029e+07	0	7.49092e-08	89.5	1.78513e-07	3	985.205
TLAEIAKVELDNMPLR	UniProtKB:Q15233				800054839	0	4.60631e-06	89.48	2.17436e-07	2	907.001
LYIGNLSENAAPSDLESIFK	UniProtKB:O00425				0	0	8.3681e-07	89.47	3.49389e-07	2	1091.07
VVGFHVLGPNAGEVTQGFAAALK	UniProtKB:Q16881				3.75162e+08	0	6.71051e-08	89.46	2.17987e-07	3	761.418
YAIcSALAASALPALVMSK	UniProtKB:P36578	C4(Carbamidomethyl)			803345867	0	3.69576e-06	89.43	3.44983e-07	2	969.007
NGDGFVSLEEFLGDYR	UniProtKB:Q14257				2.79546e+08	0	2.64635e-05	89.42	5.19095e-07	2	909.417
FNALFAQGNYSEAAK	UniProtKB:Q00610				1053621604	0	4.60342e-06	89.39	4.85983e-07	2	815.899
IFQTLNGAVDEVVLK	UniProtKB:O00469				0	0	2.2708e-05	89.37	1.72608e-07	2	823.468
FHTEALTALLSDDSK	UniProtKB:P62495				2.3237e+08	0	3.91674e-07	89.36	4.08063e-07	2	824.423
mEGcVSNLMVcNLAYSGK	UniProtKB:O75832	N-Term(Acetyl); C4(Carbamidomethyl); C11(Carbamidomethyl)			0	0	5.37143e-05	89.34	5.66755e-07	2	1037.96
QLLQANPILESFGNAK	UniProtKB:P35580				395805864	0	5.37143e-05	89.33	2.4573e-07	2	871.98
EELQLLQEQGSYVGEVVR	UniProtKB:P62195				0	0	1.6454e-06	89.31	4.42445e-07	2	1038.53
LIVDEAINEDNSVVSLSQPK	UniProtKB:P55072				1162999572	0	1.26474e-07	89.29	3.78129e-07	2	1085.57
ISGETIFVTAPHEATAGIIGVNR	UniProtKB:Q00610				227027648	0	5.02583e-08	89.29	2.67317e-07	3	785.09
LFADAVQELLPQYK	UniProtKB:P33993				1478531792	0	7.11767e-06	89.27	2.46487e-07	2	817.948
TNGDSQQPSSSGLASSK	UniProtKB:Q9UKX7				4.32475e+07	0	6.35946e-06	89.27	5.07643e-07	2	825.88
MTDQEAIQDLWQWR	UniProtKB:P06748				6360835704	0	4.98446e-05	89.25	5.56635e-07	2	910.426
IYELAAGGTAVGTGLNTR	UniProtKB:P07954				108925908	0	1.39315e-06	89.23	3.68883e-07	2	882.462
MLLDPMGGIVMTNDGNAILR	UniProtKB:P49368				1.36861e+09	0	1.62575e-07	89.23	4.4094e-07	2	1066.04
LQAQLNELQAQLSQK	UniProtKB:Q14980				126098409	0	1.34427e-06	89.19	2.14858e-07	2	856.475
QFYDQALQQAVVDDDANNAK	UniProtKB:P60033				45831872	0	5.61909e-08	89.19	6.18665e-07	2	1127.04
YTGYGNAAGLLAAR	UniProtKB:Q9NPQ8;UniProtKB:Q9NVN3				76060546	0	1.84948e-05	89.18	3.43019e-07	2	699.366
LASTLVHLGEYQAAVDGAR	UniProtKB:Q00610				1.7046e+09	0	1.65641e-07	89.18	3.36074e-07	3	657.684
SQLDLFDDVGTFASGPPK	UniProtKB:Q8N6H7				2.59326e+07	0	2.12423e-06	89.16	5.39291e-07	2	947.464
QIcLVMLETLSQSPQGR	UniProtKB:Q15365	C3(Carbamidomethyl)			356113029	0	2.41807e-06	89.16	4.34939e-07	2	980.504
VGDSQNPLLSDGDLSTMIGK	UniProtKB:Q00403				147320582	0	3.43752e-06	89.16	5.14477e-07	2	1024.01
VYEIQDIYENSWTK	UniProtKB:Q9Y262				437219883	0	2.57947e-07	89.15	5.61878e-07	2	894.425
MEEADALIESLcR	UniProtKB:Q99460	C12(Carbamidomethyl)			445855847	0	8.13652e-06	89.12	4.82376e-07	2	768.858
ALVEMQDVVAELLR	UniProtKB:Q9C0H2				1.35673e+07	0	4.29848e-05	89.12	2.64333e-07	2	793.437
TYQELLVNQNPIAQPLASR	UniProtKB:Q9NX24				258191663	0	5.37143e-05	89.12	2.72844e-07	2	1078.08
APPPLAAALAHEAVSQLLQTDLSEFR	UniProtKB:P49593				1.31729e+07	0	4.24152e-08	89.11	1.98538e-07	3	915.836
DQFGFINYEVGDSK	UniProtKB:O75534				237923998	0	5.37143e-05	89.09	5.00394e-07	2	809.868
RFEQQLAQTDGTLSTLEFQR	UniProtKB:Q9BY43				164736730	0	4.83099e-07	89.09	4.89974e-07	3	790.071
YYGGTEFIDELETLcQK	UniProtKB:P34896	C15(Carbamidomethyl)			3.47511e+07	0	9.07942e-06	89.08	6.01041e-07	2	1033.49
VWGNVGTVEWADPIEDPDPEVMAK	UniProtKB:O60506				221766413	0	1.08351e-06	89.05	6.96119e-07	2	1327.63
LVLEQVVTSIASVADTAEEK	UniProtKB:O00410				984777344	0	3.18981e-08	89.04	2.20101e-07	2	1051.58
HPSVESVVQcEIDEDVIQVSK	UniProtKB:P19623	C10(Carbamidomethyl)			3.49145e+08	0	3.60343e-07	89.04	6.30241e-07	3	799.724
LSQELEYLTEDVK	UniProtKB:P12270				856982549	0	3.70534e-05	89.02	4.32835e-07	2	783.9
EADESLNFEEQILEAAK	UniProtKB:Q9Y490				90340196	0	2.77768e-05	89.01	6.00696e-07	2	968.449
IMEGPAFNFLDAPAVR	UniProtKB:P11177				4.19953e+08	0	4.9089e-05	89	4.58815e-07	2	874.445
FLESGGQDGAGDDDDLEDLEEAEEPDMEEDDDQK	UniProtKB:P07237				5.5149e+08	0	4.6452e-10	88.99	6.21261e-07	3	1253.15
LAGTQPLEVLEAVQR	UniProtKB:P22314				3318484216	0	7.62176e-06	88.97	1.53132e-07	2	812.465
ENcPAcSQLPQNIQFSPSAK	UniProtKB:Q8TBC4	C3(Carbamidomethyl); C6(Carbamidomethyl)			1.51906e+08	0	5.96442e-07	88.96	6.99451e-07	2	1138.53
TEQQESDSVQcMPVAK	UniProtKB:Q96RE7	C11(Carbamidomethyl)			3.03897e+07	0	1.36479e-05	88.95	5.73777e-07	2	918.909
LTSFIGAIAIGDLVK	UniProtKB:P78371				1.10824e+09	0	4.00604e-05	88.94	8.44364e-08	2	759.454
mTNGFSGADLTEIcQR	UniProtKB:P55072	M1(Oxidation); C14(Carbamidomethyl)			114243554	0	1.39161e-06	88.94	5.90098e-07	2	908.41
ILTFDQLALDSPK	UniProtKB:Q07020				8.14538e+09	0	1.30632e-05	88.93	2.77754e-07	2	730.903
DcEVVMMIGLPGAGK	UniProtKB:Q00839	C2(Carbamidomethyl)			2080372862	0	2.18611e-06	88.93	4.99151e-07	2	788.881
LIINELSNVMEANAAR	UniProtKB:Q96P70				1.52567e+08	0	1.28786e-05	88.93	3.2234e-07	2	879.474
FNDsEGDDTEETEDYR	UniProtKB:Q9NYF8	S4(Phospho)	1	S(4): 100.0; T(9): 0.0; T(12): 0.0; Y(15): 0.0	132883999	0	3.58575e-05	88.92	2.08379e-07	2	1001.35
GQEADLEAGGEEVPEANGSAGK	UniProtKB:Q9NX58				9.68043e+06	0	5.38448e-07	88.92	6.47192e-07	2	1057.98
TDDYLDQPcLETVNR	UniProtKB:P31150	C9(Carbamidomethyl)			671500096	0	4.18344e-06	88.91	5.93288e-07	2	919.919
APPDGWELIEPTLDELDQK	UniProtKB:P41223				3.02272e+07	0	4.83971e-05	88.9	4.71628e-07	2	1083.55
aDDLDFETGDAGASATFPMQcSALRK	UniProtKB:P63241;UniProtKB:Q6IS14	N-Term(Acetyl); C21(Carbamidomethyl)			4256507025	0	3.51817e-08	88.89	8.2425e-07	2	1408.63
TEGTQEADQYADEK	UniProtKB:Q02952				102280363	0	3.01368e-05	88.82	4.59729e-07	2	792.839
ALQSGQcAGAALDVFTEEPPRDR	UniProtKB:O43175	C7(Carbamidomethyl)			417041728	0	3.90448e-07	88.82	6.94154e-07	3	830.07
FAcNGTVIEHPEYGEVIQLQGDQR	UniProtKB:O60739;UniProtKB:P41567	C3(Carbamidomethyl)			273583458	0	2.64813e-07	88.82	7.22563e-07	3	920.776
NVDLLSDMVQEHDEPILK	UniProtKB:P55209				6609262350	0	3.69832e-09	88.81	5.59102e-07	2	1048.02
ADNFEYSDPVDGSISR	UniProtKB:P36871				308384162	0	3.30287e-06	88.79	5.82691e-07	2	886.393
TVTLPENEDELESTNR	UniProtKB:P30876				26045767	0	1.07173e-05	88.79	6.15988e-07	2	923.938
EDQLLcTDcYSNEYSSK	UniProtKB:Q14192	C6(Carbamidomethyl); C9(Carbamidomethyl)			11537320	0	3.31906e-06	88.76	5.19675e-07	2	1056.43
DLFLAScSQDcLIR	UniProtKB:Q6IA86	C7(Carbamidomethyl); C11(Carbamidomethyl)			36965381	0	2.83766e-05	88.75	5.76481e-07	2	849.4
GNEFFcEVDEDYIQDK	UniProtKB:P67870	C6(Carbamidomethyl)			551268855	0	1.75173e-05	88.75	5.63746e-07	2	1004.42
RcLNALEELGTLQVTSQILQK	UniProtKB:Q7Z4V5	C2(Carbamidomethyl)			111607048	0	3.07909e-06	88.73	2.13678e-07	3	805.445
ETVSEESNVLcLSK	UniProtKB:P13639	C11(Carbamidomethyl)			2223730653	0	3.45735e-05	88.71	5.25558e-07	2	797.891
aASAAAASAAAASAASGsPGPGEGSAGGEK	UniProtKB:Q13263	N-Term(Acetyl); S18(Phospho)	0.00013777	S(3): 0.0; S(8): 0.0; S(13): 0.0; S(16): 0.0; S(18): 0.0; S(25): 100.0	3.49895e+08	0	3.81245e-06	88.71	7.95269e-07	2	1255.06
TTTAAAVASTGPSSR	UniProtKB:P27816				84076628	0	5.37143e-05	88.69	4.0258e-07	2	689.359
NGScGVSYIAQEPGNYEVSIK	UniProtKB:O75369	C4(Carbamidomethyl)			3.68374e+07	0	5.37143e-05	88.67	7.36002e-07	2	1136.54
IEADSESQEDIIR	UniProtKB:P55957				9.33092e+07	0	1.44608e-05	88.66	5.39745e-07	2	752.863
SSFADISNLLQIEPR	UniProtKB:Q15785				471357958	0	4.19992e-05	88.66	4.07685e-07	2	845.444
VEQLGAEGNVEESQK	UniProtKB:Q9Y383				6.82247e+08	0	6.2379e-06	88.65	5.65347e-07	2	808.893
QEASNLLQESNcSQYMEK	UniProtKB:Q13617	C12(Carbamidomethyl)			27711250	0	6.34034e-06	88.64	7.11766e-07	2	1079.97
SFMESGGTVLSTNWSDVGK	UniProtKB:Q9Y2Z0				127335451	0	4.6541e-08	88.63	6.92295e-07	2	1001.46
aHQTGIHATEELK	UniProtKB:Q6IBS0	N-Term(Acetyl)			23206020	0	5.37143e-05	88.62	4.50754e-07	2	738.881
AQEALLQLSQALSLMETVK	UniProtKB:O60664				52753077	0	1.82432e-05	88.62	2.21289e-07	3	691.719
ESDVGFIPTSGLSGENLITR	UniProtKB:Q9Y450				130972245	0	4.71221e-05	88.61	5.1122e-07	2	1046.53
GcTPSGEGADSEPR	UniProtKB:Q92917	C2(Carbamidomethyl)			59437024	0	3.57395e-05	88.59	4.01995e-07	2	710.299
ALPAVQQNNLDEDLIRK	UniProtKB:P22314				3456836188	0	5.87755e-06	88.58	2.93646e-07	2	969.026
IAEcLQTISDLETEcLDLR	UniProtKB:Q676U5	C4(Carbamidomethyl); C15(Carbamidomethyl)			0	0	1.40823e-08	88.55	6.88898e-07	2	1140.05
SLGGDVASDGDFLIFEGNR	UniProtKB:O00267				39322927	0	2.52669e-06	88.54	6.32264e-07	2	984.98
TcFYAEQGGQIYDEGYLVK	UniProtKB:P49588	C2(Carbamidomethyl)			1.06917e+07	0	5.99635e-06	88.54	7.53398e-07	2	1121.01
ILLSVVSMLAEPNDESGANVDASK	UniProtKB:P60604				1.76005e+08	0	3.47468e-07	88.54	5.436e-07	2	1230.12
SNLVDNTNQVEVLQR	UniProtKB:Q9UMR2;UniProtKB:Q9NUU7				98084810	0	4.64132e-05	88.52	4.17666e-07	2	864.956
WTWAVEWLGDELER	UniProtKB:Q93008;UniProtKB:O00507				8.18909e+06	0	1.00757e-05	88.52	5.64669e-07	2	895.446
YVLINWVGEDVPDAR	UniProtKB:Q16643				323262066	0	5.37143e-05	88.47	5.05709e-07	2	873.449
LDLQQGQNLLQGLSK	UniProtKB:Q9HCE1				221022804	0	3.2779e-06	88.46	2.38076e-07	2	827.964
LTLTSDESTLIEDGGAR	UniProtKB:Q9NRX5				21570349	0	3.72965e-05	88.46	5.7787e-07	2	889.445
mIELLADNINLGDPSSMLK	UniProtKB:Q9H583	M1(Oxidation)			2.9763e+07	0	3.01174e-07	88.41	5.43605e-07	2	1045.53
SQVFSTAADGQTQVEIK	UniProtKB:P38646				14153352	0	1.30727e-05	88.39	5.36335e-07	2	904.959
SFITTDVNPYYDSFVR	UniProtKB:Q9P2J5				30234787	0	7.90485e-06	88.37	6.78389e-07	2	962.457
VEEEDDAEHVLALTMLcLTEGAK	UniProtKB:O75607	C17(Carbamidomethyl)			3.80706e+06	0	1.86616e-06	88.37	7.76924e-07	3	858.413
ISIVEALTLLNNHK	UniProtKB:Q9P032				76922984	0	5.35205e-05	88.36	1.08098e-07	3	522.311
ATNIEVLSNTFQFTNEAR	UniProtKB:O75534				200228726	0	1.05942e-05	88.34	6.05271e-07	2	1028.01
NPVEGFSAGLIDDNDLYR	UniProtKB:P62253				41589719	0	8.02526e-07	88.31	6.99264e-07	2	997.975
EENVGLHQTLDQTLNELNcI	UniProtKB:P67936	C19(Carbamidomethyl)			7.88859e+08	0	2.78664e-06	88.29	7.78693e-07	2	1170.56
SQEATEAAPScVGDMADTPR	UniProtKB:Q9UHD8	C11(Carbamidomethyl)			59378532	0	1.33633e-06	88.28	6.93115e-07	2	1046.95
ETNLDSLPLVDTHSK	UniProtKB:P08670				5291903022	0	1.68214e-05	88.27	5.28947e-07	2	834.927
SILTPEGVFILNLVcR	UniProtKB:Q8N6R0	C15(Carbamidomethyl)			1.19206e+07	0	4.37852e-06	88.25	1.72142e-07	2	916.024
QATTIIADNIIFLSDQTK	UniProtKB:Q04837				130775477	0	9.50499e-08	88.25	3.1204e-07	2	996.54
NVcQTcLLDLEYGLPIQVR	UniProtKB:Q9NW64	C3(Carbamidomethyl); C6(Carbamidomethyl)			350419385	0	1.69758e-07	88.25	5.99168e-07	2	1146.08
QASPNIVIALAGNK	UniProtKB:P51148				265177400	0	5.37143e-05	88.24	1.4352e-07	2	698.41
QISNLQQSISDAEQR	UniProtKB:CON_P04264;UniProtKB:P04264				112115070	0	3.3551e-05	88.24	5.91926e-07	2	858.93
HLLSLMGIPYLDAPSEAEAScAALVK	UniProtKB:P39748	C21(Carbamidomethyl)			371261791	0	7.14874e-09	88.24	4.71201e-07	3	919.479
TNMLLQLDGSTPIcEDIGR	UniProtKB:O75439	C14(Carbamidomethyl)			4.91713e+07	0	7.36896e-07	88.23	6.75287e-07	2	1067.02
VAMANIQPQMLVAGATSIAR	UniProtKB:P18206				2.79781e+08	0	1.86865e-07	88.21	3.28669e-07	2	1021.55
MVEEVFSNAIDcLSDEDK	UniProtKB:P42285	C12(Carbamidomethyl)			7.5699e+07	0	4.36912e-07	88.2	7.41796e-07	2	1050.96
GIIWGEDTLMEYLENPKK	UniProtKB:P99999				558280226	0	3.15312e-06	88.2	6.20106e-07	3	712.695
EDLNcQEEEDPMNK	UniProtKB:O75821	C5(Carbamidomethyl)			442398410	0	3.61312e-05	88.19	4.671e-07	2	875.85
GSSGVGLTAAVTTDQETGER	UniProtKB:P25205				33166287	0	1.04107e-05	88.18	7.07891e-07	2	968.464
VVVPIYcTSFLAVEEDK	UniProtKB:Q8IWX8	C7(Carbamidomethyl)			302298466	0	9.17331e-07	88.16	4.85079e-07	2	985.013
VcNDEQLLLELQQIK	UniProtKB:Q7Z6Z7	C2(Carbamidomethyl)			86754822	0	5.0619e-06	88.14	4.51945e-07	2	921.985
SMAEQIEADVILLR	UniProtKB:O00178				69911042	0	4.98033e-05	88.13	3.63312e-07	2	794.434
sLDIQSLDIQcEELSDAR	UniProtKB:P13489	N-Term(Acetyl); C11(Carbamidomethyl)			261520791	0	3.25679e-07	88.12	7.88734e-07	2	1067.5
SVMNTAGNSAPSLFLK	UniProtKB:Q9H9A5				13814702	0	5.35122e-05	88.11	4.78874e-07	2	818.931
ALPAVQQNNLDEDLIR	UniProtKB:P22314				2.69866e+08	0	4.42832e-06	88.08	3.97938e-07	2	904.984
ALTVPELTQQMFDAK	UniProtKB:P68371;UniProtKB:Q13509;UniProtKB:P04350				1.69865e+09	0	8.14021e-06	88.07	5.11455e-07	2	846.44
NSLFGSVETWPWQVLSK	UniProtKB:Q9NRV9				72385429	0	4.11253e-05	88.06	4.71055e-07	2	989.518
GQGcTAYDVAVNSDFYR	UniProtKB:Q9NWS0	C4(Carbamidomethyl)			24812651	0	3.35529e-06	88.05	7.29401e-07	2	961.922
QLVPASGLTVMDLEAEGTcLR	UniProtKB:Q6P996;UniProtKB:Q6P474	C19(Carbamidomethyl)			0	0	4.40754e-07	88.05	6.35083e-07	2	1130.57
LGFAGLVQEISFGTTK	UniProtKB:P48643				4346039795	0	1.03722e-07	88.04	2.46783e-07	2	834.468
EGLISQDGSSLEALLR	UniProtKB:Q92785				175436397	0	1.40252e-05	88.04	4.21485e-07	2	844.453
RQVLLSAAEAAEVILR	UniProtKB:P78371				21818003	0	6.47087e-06	88.03	1.03568e-07	3	580.345
IGNEGLAADLTDDPDTEEALK	UniProtKB:Q13033				76645417	0	2.50047e-07	87.99	8.0444e-07	2	1094.02
NIAFFSTNcVEGTAR	UniProtKB:P05023	C9(Carbamidomethyl)			56623622	0	5.37143e-05	87.98	6.72867e-07	2	843.901
YGPADVEDTTGSGATDSK	UniProtKB:P24534				1.03315e+07	0	3.58564e-05	87.98	6.76689e-07	2	885.891
AKQEPEVNGGSGDAVPSGNEVSENMEEEAENQAESR	UniProtKB:P49321				349061703	0	1.01679e-10	87.97	1.12087e-06	3	1258.89
aAAAEcDVVMAATEPELLDDQEAKR	UniProtKB:Q99615	N-Term(Acetyl); C6(Carbamidomethyl)			2.45688e+08	0	1.65256e-06	87.95	9.50564e-07	2	1373.15
EAGAGGLAIAVEGPSK	UniProtKB:P21333				273342580	0	2.05877e-05	87.93	4.05158e-07	2	713.885
VSQFLVDGVcTVANcVGK	UniProtKB:Q8N0X7	C10(Carbamidomethyl); C15(Carbamidomethyl)			137227508	0	1.34902e-07	87.93	6.81384e-07	2	976.982
LFIGGLNVQTSESGLR	UniProtKB:Q13151				1.89405e+09	0	2.52149e-05	87.92	3.61616e-07	2	845.961
GVGDGTVSWGLEDDEDMTLTR	UniProtKB:Q13404;UniProtKB:Q15819				0	0	2.59739e-06	87.9	8.56721e-07	2	1127
cGDYGGALAAYTQALGLDATPQDQAVLHR	UniProtKB:Q9H3U1	C1(Carbamidomethyl)			137643586	0	1.27379e-11	87.9	8.98402e-07	3	1011.49
LScFAQTVSPAEK	UniProtKB:Q16658	C3(Carbamidomethyl)			2.33347e+08	0	5.37143e-05	87.89	5.83978e-07	2	719.359
GPFELEAFYSDPQGVPYPEAK	UniProtKB:Q92598				71519575	0	3.11541e-06	87.86	8.73323e-07	2	1171.06
VLAQNSGFDLQETLVK	UniProtKB:P40227				1501245312	0	2.22568e-06	87.83	3.52295e-07	2	881.482
VQSTADIFGDEEGDLFK	UniProtKB:Q641Q2;UniProtKB:Q5SNT6;UniProtKB:Q9Y4E1				45070546	0	8.04876e-06	87.8	7.84321e-07	2	935.942
LSPPYSSPQEFAQDVGR	UniProtKB:Q13263				1.45158e+09	0	2.79574e-07	87.8	7.42416e-07	2	939.457
FRcPEALFQPSFLGMEScGIHETTFNSIMK	UniProtKB:CON_P60712;UniProtKB:P63261	C3(Carbamidomethyl); C18(Carbamidomethyl)			17969103456	0	6.05655e-13	87.8	1.08827e-06	3	1178.89
SGGVNQYVVQEVLSIK	UniProtKB:Q15021				184334078	0	1.77111e-05	87.78	3.18111e-07	2	860.475
LGGSAVISLEGKPL	UniProtKB:P23528				1.9663e+09	0	4.39753e-06	87.74	1.91741e-07	2	670.895
ISNAQLQTELVEILK	UniProtKB:Q93034				9.82198e+07	0	2.4615e-06	87.72	1.96091e-07	2	849.989
SLTFVQAGQDLEENMDEDISEK	UniProtKB:Q96RS6				58843186	0	3.62585e-07	87.71	1.00245e-06	2	1249.57
aDHVQSLAQLENLcK	UniProtKB:Q9UIA9	N-Term(Acetyl); C14(Carbamidomethyl)			2.56611e+08	0	1.22809e-07	87.7	7.01714e-07	2	884.436
ALESSIAPIVIFASNR	UniProtKB:Q9Y265				607195821	0	9.72347e-06	87.69	2.89537e-07	2	844.473
ERPTPSLNNNcTTSEDSLVLYNR	UniProtKB:P07814	C11(Carbamidomethyl)			170102712	0	2.18483e-07	87.68	9.38431e-07	3	894.096
VLSTNTDDNIGGAHFTETLAQYLASEFQR	UniProtKB:Q0VDF9				3.92115e+08	0	3.98468e-07	87.68	8.88272e-07	3	1066.85
FYFVGDEDLLEIIGNSK	UniProtKB:Q14204				2.02989e+08	0	1.16681e-06	87.67	6.39802e-07	2	979.998
VAAScGAIQYIPTELDQVR	UniProtKB:Q7L2H7	C5(Carbamidomethyl)			106837199	0	1.62459e-07	87.67	6.31936e-07	2	1046.03
ELLVDcYKPTEAFISGLLDK	UniProtKB:Q96C90	C6(Carbamidomethyl)			3.00036e+09	0	8.14615e-08	87.67	4.61533e-07	2	1156.11
VANQDLQVQLDQALQQALDPNSK	UniProtKB:Q96EA4				35490685	0	2.08375e-08	87.67	5.27796e-07	2	1268.66
TTLQVDTLNAELAAER	UniProtKB:P35580				222048891	0	5.67892e-08	87.66	5.28927e-07	2	872.96
LAQQQAALLMQQEER	UniProtKB:Q13435				459857795	0	1.3882e-05	87.65	6.13036e-07	2	878.95
VEESSWLIEDGK	UniProtKB:Q9Y266				4.3639e+08	0	5.37143e-05	87.63	6.13622e-07	2	696.34
EYFGEFGEIEAIELPMDPK	UniProtKB:Q99729				443897720	0	3.37367e-06	87.63	8.76726e-07	2	1107.53
LQEVLDYLTNSASLQMK	UniProtKB:Q8TBC4				265777042	0	8.22552e-07	87.62	5.44114e-07	2	977.009
AEScGSGNSTGYQIR	UniProtKB:Q9H2U1	C4(Carbamidomethyl)			2.5643e+07	0	4.48625e-05	87.61	6.57285e-07	2	793.851
DASALLDPMEcTDTAEEQR	UniProtKB:Q9BTE3	C11(Carbamidomethyl)			4.0273e+07	0	1.18179e-07	87.58	8.53358e-07	2	1076.47
FVESDADEELLFNIPFTGNVK	UniProtKB:Q9GZP4				27477581	0	1.13988e-07	87.52	7.66369e-07	2	1192.6
ASGNYATVISHNPETK	UniProtKB:P62917				2609692062	0	4.91314e-05	87.5	7.41098e-07	2	844.919
PFLELDTNLPANRVPAGLEK	UniProtKB:A6NHG4;UniProtKB:P30046				4.64832e+09	0	2.93727e-08	87.47	2.91779e-07	2	1097.61
LVPLLLEDGGEAPAALEAALEEK	UniProtKB:Q14204				2.09632e+08	0	2.90858e-07	87.46	2.39866e-07	2	1174.65
ANIVHLMLSSPEQIQK	UniProtKB:P55060				933220316	0	1.15747e-07	87.45	3.57346e-07	2	904.495
KPATPAEDDEDDDIDLFGsDNEEEDK	UniProtKB:P29692	S19(Phospho)	1	T(4): 0.0; S(19): 100.0	4.25486e+08	0	1.61814e-08	87.42	8.5142e-07	3	997.061
LADFGVAGQLTDTQIK	UniProtKB:Q9Y6E0;UniProtKB:O00506;UniProtKB:Q9P289				1.75443e+08	0	1.04062e-06	87.37	4.90511e-07	2	838.948
SAAQAAAQTNSNAAGK	UniProtKB:Q8NC51				292307724	0	2.09543e-05	87.35	7.10906e-07	2	730.859
AINQQTGAFVEISR	UniProtKB:Q92945				579512482	0	3.87636e-05	87.34	4.72416e-07	2	767.412
EINSDQATQGNISSDR	UniProtKB:Q29RF7				6.99377e+06	0	3.47696e-05	87.34	8.11807e-07	2	867.897
GNAGGIQPDLLISLTAPK	UniProtKB:Q8NCW5				244593782	0	4.97492e-07	87.34	2.4059e-07	2	883.001
SLDDDLDGVPLDATEDSK	UniProtKB:O15042				1.01342e+08	0	1.27251e-07	87.31	9.06516e-07	2	952.936
LVPLLDTGDIIIDGGNSEYR	UniProtKB:P52209				1792016463	0	9.32338e-08	87.31	5.00864e-07	2	1080.57
EAAPDAGAEPITADSDPAYSSK	UniProtKB:Q8N163				132285726	0	1.13324e-05	87.3	9.79085e-07	2	1081.99
SIVTAEVSSMPAcK	UniProtKB:Q86SZ2	C13(Carbamidomethyl)			32231200	0	1.13276e-05	87.29	6.76936e-07	2	740.363
ITLPVDFVTADKFDENAK	UniProtKB:P00558				3024367239	0	1.35894e-05	87.27	6.29623e-07	2	1012.02
YGIIcMEDLIHEIYTVGK	UniProtKB:P18124	C5(Carbamidomethyl)			7.42148e+08	0	2.57584e-07	87.27	7.76904e-07	3	718.697
FAGYVTSIAATELEDDDDDYSSSTSLLGQK	UniProtKB:O75533				269979642	0	1.00146e-06	87.26	1.20032e-06	3	1066.83
TcTTVAFTQVNSEDK	UniProtKB:P62424	C2(Carbamidomethyl)			1706125307	0	4.69721e-05	87.25	7.91509e-07	2	850.898
LATQSNEITIPVTFESR	UniProtKB:P04792				145496598	0	2.01508e-06	87.25	5.95045e-07	2	953.498
NEGSEsAPEGQAQQR	UniProtKB:P67809	S6(Phospho)	1	S(4): 0.0; S(6): 100.0	9.6141e+07	0	4.3714e-05	87.23	5.60512e-07	2	834.338
FLQGDSFLNEDLNQLIK	UniProtKB:Q8WTT2				3.80205e+08	0	2.0399e-07	87.2	5.71257e-07	2	997.524
VKPAPDETSFSEALLK	UniProtKB:Q12905				2.11351e+09	0	2.03345e-06	87.18	4.78277e-07	3	577.979
AVFVDLEPTVIDEVR	Ensembl:CON_ENSBTAP00000016242;UniProtKB:Q71U36;UniProtKB:P68363;UniProtKB:Q9BQE3				28004916510	0	2.06624e-05	87.16	4.69138e-07	2	851.461
aSFVTEVLAHSGR	UniProtKB:O43264	N-Term(Acetyl)			29317294	0	5.37143e-05	87.15	5.45104e-07	2	708.377
AVQGGGATPVVGAVQGPVPGMPPMTQAPR	UniProtKB:P09012				174605988	0	2.31857e-08	87.15	5.56187e-07	3	909.812
TLFSNIVLSGGSTLFK	UniProtKB:P61163				97056307	0	4.54115e-06	87.13	3.8254e-07	2	842.466
SPSAQLMEQVAQLK	UniProtKB:Q14203				170120081	0	2.0571e-06	87.09	5.62263e-07	2	765.407
ELEDATETADAMNR	UniProtKB:P35579				621728576	0	5.16761e-05	87.06	7.11784e-07	2	783.343
NVNTALNTTQIPSSIEDIFNDDR	UniProtKB:Q13564				355513473	0	5.08593e-09	87.06	9.87977e-07	2	1289.13
VQGLEQAVDNFEGK	UniProtKB:O95817				102297518	0	5.37143e-05	87.05	7.17567e-07	2	767.385
SLHDALcVLAQTVK	UniProtKB:P78371	C7(Carbamidomethyl)			4.45315e+09	0	1.00046e-05	87.05	5.00404e-07	2	777.918
IDFYFDENPYFENK	UniProtKB:Q01105				4505618062	0	4.41293e-06	87.05	8.86703e-07	2	920.907
VLGAHILGPGAGEMVNEAALALEYGAScEDIAR	UniProtKB:P09622	C28(Carbamidomethyl)			19962326	0	2.21719e-09	87.05	8.02973e-07	3	1118.9
GDADQASNILASFGLSAR	UniProtKB:P43243				783679074	0	1.23295e-06	87.03	9.10413e-07	2	896.934
IPAFLNVVDIAGLVK	UniProtKB:Q9NTK5				5.1509e+08	0	2.45409e-07	87	6.60432e-08	2	784.985
MQMLEDEDDLAYAETEK	UniProtKB:Q14204				5.7236e+07	0	4.51051e-07	86.99	8.97938e-07	2	1015.93
YINENLIVNTDELGR	UniProtKB:P17987				292405068	0	4.57828e-06	86.97	6.50645e-07	2	881.959
HGLLVPNNTTDQELQHIR	UniProtKB:P56537				734860136	0	2.79221e-07	86.97	5.47779e-07	3	695.706
GTGQSDDSDIWDDTALIK	UniProtKB:Q16637				1.19284e+08	0	1.50937e-05	86.96	9.61956e-07	2	968.956
IcDYLFNVSDSSALNLAK	UniProtKB:P55265	C2(Carbamidomethyl)			46436332	0	9.67127e-08	86.95	8.57402e-07	2	1015.5
VQVQDNEGcPVEALVK	UniProtKB:P21333	C9(Carbamidomethyl)			5.64618e+08	0	3.90626e-05	86.94	7.84021e-07	2	892.949
DLSEVSETTESTDVK	UniProtKB:P41227				226351742	0	5.22678e-06	86.86	8.5784e-07	2	820.383
VTGEADVEFATHEDAVAAMSK	UniProtKB:P31943				5.36251e+07	0	1.24442e-08	86.86	1.06802e-06	3	726.676
GENSWFSTQVDTVATK	UniProtKB:P08195				136878030	0	4.04571e-06	86.85	9.19301e-07	2	885.416
AADPPAENSSAPEAEQGGAE	UniProtKB:P67809				1.15715e+09	0	5.20962e-07	86.84	8.9575e-07	2	949.41
WEESGPQFITNSEEVR	UniProtKB:Q13257				1.43337e+08	0	1.38333e-05	86.84	9.82903e-07	2	954.444
aVNVYSTSVTSDNLSR	UniProtKB:Q15691	N-Term(Acetyl)			4.49968e+08	0	7.65711e-07	86.81	8.78821e-07	2	877.932
EAHQLFLEPEVLDPESVELK	UniProtKB:P39748				1150467912	0	3.96154e-08	86.81	7.48332e-07	2	1161.6
MVSISNYPLSAALTcAK	UniProtKB:Q92979	C15(Carbamidomethyl)			4.74692e+07	0	6.88231e-06	86.79	7.55242e-07	2	913.467
FSGWYDADLSPAGHEEAK	UniProtKB:P18669				4.24876e+09	0	5.24127e-07	86.78	1.02397e-06	2	990.448
EEEGTGVVHQAPYFGAEDYR	UniProtKB:P41252				309636994	0	4.49372e-05	86.78	1.17709e-06	3	752.009
TVDGMQQEGTPYTGILYAGIMLTK	UniProtKB:P22102				40131358	0	2.7257e-06	86.77	9.12935e-07	2	1294.15
TAAANAAAGAAENAFR	UniProtKB:O14828				2.76556e+08	0	2.53607e-05	86.76	7.98959e-07	2	738.866
aTDSWALAVDEQEAAAESLSNLHLK	UniProtKB:Q9UMR2	N-Term(Acetyl)			88275877	0	1.39824e-07	86.76	8.92582e-07	3	904.457
EIILVDDYSNDPEDGALLGK	UniProtKB:Q10471				3.43988e+07	0	2.17135e-05	86.75	9.49062e-07	2	1088.54
EFNEEGALSVLQQFK	UniProtKB:O43390				462467890	0	2.73442e-05	86.73	7.92501e-07	2	869.94
YVEVYEINNEDVDALMK	UniProtKB:Q12849				17089619	0	5.88122e-07	86.7	1.07058e-06	2	1022.48
LADSGDGAGPSPEEK	UniProtKB:Q92917				0	0	5.65079e-06	86.66	7.89627e-07	2	715.328
VPAATSAIITNDGIGINPAQTAGNVFLK	UniProtKB:P61960				0	0	6.60772e-07	86.66	2.42638e-07	2	1377.27
QLQEQHYQQYMQQLYQVQLAQQQAALQK	UniProtKB:Q9H3P7				79126562	0	1.20881e-08	86.65	9.81225e-07	3	1154.91
LISQIVSSITASLR	Ensembl:CON_ENSBTAP00000016242;UniProtKB:P68363;UniProtKB:Q9BQE3;UniProtKB:Q9H853;UniProtKB:P68366;UniProtKB:Q9NY65				3270999920	0	1.60356e-05	86.63	1.22866e-07	2	744.452
SGDAAIVDmVPGKPMcVESFSDYPPLGR	UniProtKB:P68104;UniProtKB:Q5VTE0	M9(Oxidation); C16(Carbamidomethyl)			5.09024e+08	0	2.92186e-07	86.63	1.29678e-06	3	1004.47
INVLAAQYQSLLNSYGEPVDDK	UniProtKB:O00429				1.1953e+08	0	1.57991e-07	86.61	8.92191e-07	2	1219.11
VGSDMTSQQEFTScLK	UniProtKB:P40855	C14(Carbamidomethyl)			7.155e+07	0	1.63494e-06	86.59	9.78978e-07	2	909.408
QLAQIDGTLSTIEFQR	UniProtKB:Q9H444				250925403	0	2.48757e-06	86.58	5.93862e-07	2	910.485
FFPYYVYNIIGGLDEEGK	UniProtKB:P20618				2.45653e+07	0	5.01655e-06	86.57	8.92736e-07	2	1062.53
TILTLTGVSTLGDVK	UniProtKB:A6NDG6				2.14289e+08	0	3.9516e-05	86.56	1.88012e-07	2	759.448
GVEGYGNDQTYFEEIK	UniProtKB:Q7KZ85				5.71552e+07	0	2.16911e-05	86.52	1.05828e-06	2	924.919
FVLSGANIMcPGLTSPGAK	UniProtKB:Q9ULC4	C10(Carbamidomethyl)			149128182	0	1.52498e-07	86.49	8.01515e-07	2	960.491
aSQSQGIQQLLQAEK	UniProtKB:O75348;UniProtKB:O95670	N-Term(Acetyl)			285232579	0	7.98385e-06	86.48	6.75054e-07	2	835.942
VSEEAESQQQWDTSK	UniProtKB:Q01082				0	0	9.32435e-06	86.45	1.02385e-06	2	876.398
GFSEGLWEIENNPTVK	UniProtKB:P51858				7.86898e+08	0	3.1517e-06	86.44	9.63331e-07	2	910.451
YAAVTQFEATDAR	UniProtKB:P55786;UniProtKB:A6NEC2				278067976	0	5.37143e-05	86.41	8.395e-07	2	721.85
DAQDAEAAMDGAELDGR	UniProtKB:Q9BRL6				52236715	0	2.74342e-06	86.41	8.92983e-07	2	867.867
SNEYQLIDcAQYFLDK	UniProtKB:Q5JWF2;UniProtKB:P63092	C9(Carbamidomethyl)			81642489	0	1.60213e-05	86.37	1.14784e-06	2	1003.96
LAENAcTLADLTEGQVGK	UniProtKB:P05423	C6(Carbamidomethyl)			2.16532e+07	0	4.52169e-06	86.31	9.44422e-07	2	945.473
DLSHIGDAVVIScAK	UniProtKB:P12004	C13(Carbamidomethyl)			1835512333	0	3.83898e-07	86.29	7.15463e-07	2	792.918
LPVVIGGLLDVDcSEDVIK	UniProtKB:Q00610	C13(Carbamidomethyl)			285904213	0	5.34755e-10	86.28	4.27441e-07	2	1021.06
TTETQVLVASAQK	UniProtKB:P12081				1.33679e+08	0	4.17201e-05	86.26	5.10211e-07	2	688.38
RVENSIPAAGETQNVEVAAGPAGK	UniProtKB:Q15020				1.70444e+08	0	1.35702e-05	86.26	7.74011e-07	3	789.077
AFADALEVIPMALSENSGmNPIQTMTEVR	UniProtKB:P48643	M19(Oxidation)			1.88523e+08	0	5.30601e-05	86.24	1.26091e-06	3	1051.18
LSDFNDITNMLLLK	UniProtKB:P78527				1.13544e+08	0	5.08987e-06	86.22	6.65244e-07	2	818.937
LDGNELDLSLSDLNEVPVK	UniProtKB:Q96AG4				0	0	8.91274e-07	86.22	9.0307e-07	2	1035.52
GVSGScNIDVVcPEGDGRR	UniProtKB:CON_P15636	C6(Carbamidomethyl); C12(Carbamidomethyl)			5398503021	0	2.93114e-05	86.2	1.18478e-06	3	678.642
NLEAYGLDPYSVAAILQQR	UniProtKB:P41214				0	0	1.49067e-06	86.2	7.8058e-07	2	1061.05
TTDFSDFLSIVGcTK	UniProtKB:Q9UHD1	C13(Carbamidomethyl)			676440307	0	1.09136e-05	86.18	1.03144e-06	2	845.904
TLQEQLENGPNTQLAR	UniProtKB:Q9P2E9				29065115	0	3.63622e-05	86.17	7.88286e-07	2	906.469
IGGVQQDTILAEGLHFR	UniProtKB:Q99623				703013295	0	5.94286e-07	86.16	5.51874e-07	3	618.671
GGESIFGQLYGDQASFFEAEK	UniProtKB:Q8WUA2				60092570	0	9.10461e-07	86.13	1.35323e-06	2	1140.53
AYHEQLTVAEITNAcFEPANQMVK	UniProtKB:Q9BQE3	C15(Carbamidomethyl)			81544306	0	1.40568e-08	86.13	1.35262e-06	3	922.109
FcADSDGFSQELR	UniProtKB:P52732	C2(Carbamidomethyl)			148869652	0	5.37143e-05	86.12	7.71269e-07	2	766.325
LHDINAQMVEDQGFLDSLR	UniProtKB:P63010				458285649	0	1.30266e-07	86.12	1.19472e-06	3	734.361
KLGVNNISGIEEVNMFTNQGTVIHFNNPK	UniProtKB:P20290				1.15349e+08	0	2.49626e-10	86.11	7.41087e-07	3	1072.22
AQSSQDAVSSMNLFDLGGQYLR	UniProtKB:Q9UHX1				3.7671e+08	0	6.89917e-09	86.09	1.29477e-06	2	1194.07
QNcFDDFQcAAEYLIK	UniProtKB:P48147	C3(Carbamidomethyl); C9(Carbamidomethyl)			3.88158e+07	0	2.22141e-05	86.08	1.14523e-06	2	1011.44
LVPLVEDFcNLDDDELR	UniProtKB:O75155	C9(Carbamidomethyl)			0	0	5.37143e-05	86.04	1.11389e-06	2	1031.51
ILATGANVILTTGGIDDMcLK	UniProtKB:P17987	C19(Carbamidomethyl)			277467984	0	1.6527e-08	86.03	6.82147e-07	2	1088.58
LVVEcVmNNVTcTR	UniProtKB:Q01469	C5(Carbamidomethyl); M7(Oxidation); C12(Carbamidomethyl)			1.11736e+07	0	2.59092e-05	86.02	1.1124e-06	2	855.908
AMDPQDLQNTEVPIATTAK	UniProtKB:Q9H2M9				1.47667e+07	0	9.85708e-06	86.02	1.0639e-06	2	1022.01
NGSLDSPGKQDTEEDEEEDEK	UniProtKB:Q9Y266				2.20815e+08	0	6.88754e-06	86.02	1.18579e-06	3	784.326
GVAALTSDPAVQAIVLDTASDVLDK	UniProtKB:Q9Y490				1.81592e+08	0	1.6732e-07	86.02	4.61314e-07	3	823.784
QIQEEITGNTEALSGR	UniProtKB:Q9NVD7				1.77098e+07	0	1.47747e-06	86.01	9.95552e-07	2	873.438
LQQQLTQAAQELAAEK	UniProtKB:Q15075				27967120	0	7.32992e-06	86.01	5.54853e-07	2	885.481
AFTKPEEAcSFILSADFPALVVK	UniProtKB:P22102	C9(Carbamidomethyl)			715651704	0	1.75329e-07	86	6.29102e-07	2	1270.68
LcEPEVLNSLEETYSPFFR	UniProtKB:Q6PJT7	C2(Carbamidomethyl)			1.5303e+07	0	3.49523e-06	85.99	1.3204e-06	2	1165.56
LDLLSDTNMVDFAmDVYK	UniProtKB:P60228	M14(Oxidation)			22888390	0	4.45943e-06	85.98	1.29581e-06	2	1053.49
SQNVMAAASIANIVK	UniProtKB:P17987				1251188264	0	2.83798e-05	85.96	5.87389e-07	3	506.28
DMGEDLEcLcQIMR	UniProtKB:P78344	C8(Carbamidomethyl); C10(Carbamidomethyl)			1.98214e+08	0	9.55132e-06	85.96	8.60296e-07	2	885.363
GIAFPTSISVNNcVcHFSPLK	UniProtKB:Q9UQ80	C13(Carbamidomethyl); C15(Carbamidomethyl)			2934318356	0	1.41796e-07	85.96	1.07819e-06	2	1174.59
GVMLAVDAVIAELK	UniProtKB:P10809				7.79366e+07	0	4.25675e-05	85.94	2.83717e-07	2	714.92
LPGGELNPGEDEVEGLK	UniProtKB:O43809				5.51544e+08	0	1.11913e-08	85.93	1.00181e-06	2	876.939
YLLQYQEPIPcEQLVTALcDIK	UniProtKB:P25789	C11(Carbamidomethyl); C19(Carbamidomethyl)			2.80449e+09	0	2.39993e-07	85.89	8.49027e-07	2	1347.7
SVTEQGAELSNEER	UniProtKB:P63104				5199570820	0	2.2716e-05	85.87	1.01678e-06	2	774.862
IAFIMDESNVLDSGFLER	UniProtKB:Q14204				4.26271e+07	0	6.06563e-07	85.87	1.0424e-06	2	1028.52
TQEIQENLLSLEETMK	UniProtKB:Q92888				42337287	0	1.46791e-05	85.85	8.99915e-07	2	953.491
EHAPSIIFMDEIDSIGSSR	UniProtKB:P62195				309110947	0	8.31388e-07	85.85	1.26485e-06	3	702.006
GVETIANDVVSLATK	UniProtKB:P10515				433149487	0	5.09009e-05	85.83	5.3275e-07	2	758.922
tDQAFVTLTTNDAYAK	UniProtKB:P46976	N-Term(Acetyl)			1.35824e+08	0	1.53116e-06	85.82	1.1736e-06	2	900.934
MAVQDAVDALMQK	UniProtKB:P46060				770652909	0	2.99593e-05	85.8	9.06127e-07	2	710.353
mITSAAGIISLLDEDEPQLK	UniProtKB:Q99460	M1(Oxidation)			4.62689e+07	0	2.38788e-08	85.8	7.72773e-07	2	1080.57
NTIEMQAITALAHLR	UniProtKB:Q9BZE4				1.27426e+08	0	2.1165e-06	85.79	5.55211e-07	3	561.31
VFGAPNVVEDEIDQYLSK	UniProtKB:Q8TAT6				28651231	0	3.06749e-06	85.78	9.22729e-07	2	1012.02
LAAVAQGEEENASR	UniProtKB:Q8IWJ2				37067061	0	1.05134e-05	85.76	9.67338e-07	2	722.859
FTLDcTHPVEDGIMDAANFEQFLQER	UniProtKB:P35268	C5(Carbamidomethyl)			8467125962	0	2.73052e-07	85.76	1.75257e-06	3	1028.47
IETVNESWNALATPSDK	UniProtKB:P21399				6.94753e+07	0	3.82609e-05	85.75	1.08278e-06	2	937.967
ENLWLNLTDGSILcGR	UniProtKB:P45974	C14(Carbamidomethyl)			9.25785e+07	0	2.08187e-05	85.73	1.02724e-06	2	930.972
TTPQSEMGGYYcNVcDcVVK	UniProtKB:Q96NC0	C12(Carbamidomethyl); C15(Carbamidomethyl); C17(Carbamidomethyl)			46781113	0	1.87207e-06	85.72	1.32324e-06	2	1184.49
GFEVVYMTEPIDEYcVQQLK	UniProtKB:P08238	C15(Carbamidomethyl)			1212792018	0	3.42195e-08	85.7	1.54992e-06	2	1224.57
ILGLAIESQDAGIK	UniProtKB:O00161				82652322	0	5.15666e-05	85.68	3.57463e-07	2	714.414
SPLIESTANMDNNQSQK	UniProtKB:O14974				9303412	0	3.22946e-05	85.68	1.26126e-06	2	938.943
MSSFGDFVALSDVcDVPTAK	UniProtKB:P31939	C14(Carbamidomethyl)			584749841	0	7.30015e-08	85.68	1.40187e-06	2	1073.49
TDDYLDQPcYETINR	UniProtKB:P50395	C9(Carbamidomethyl)			8.71111e+08	0	4.66462e-06	85.67	1.24276e-06	2	951.912
YIDSADLEPITSQEEPVR	UniProtKB:P17812				148877414	0	6.26608e-07	85.64	1.23841e-06	2	1031.51
ISVAGVTSSNVGYLAHAIHQVTK	UniProtKB:P00505				134857852	0	2.51055e-07	85.63	5.10128e-07	4	588.825
IISSIEQKEENK	UniProtKB:P62258				1696099168	0	5.37143e-05	85.61	6.96866e-07	2	709.383
ARPFPDGLAEDIDKGEVSAR	UniProtKB:P13639				602119964	0	6.98547e-10	85.61	1.07882e-06	3	715.033
QLLcGAAIGTHEDDK	UniProtKB:P12268	C4(Carbamidomethyl)			9.38288e+08	0	3.40077e-05	85.58	1.11715e-06	2	814.396
QDVEScYFAAQTMK	UniProtKB:Q9Y5L0	C6(Carbamidomethyl)			36821003	0	1.45108e-05	85.58	1.02986e-06	2	839.362
IGFPETTEEELEEIASENSDcIFPSAPDVKA	UniProtKB:Q9Y3F4	C21(Carbamidomethyl)			8.85142e+07	0	9.69129e-06	85.58	1.72118e-06	3	1142.21
INISQVIAVVGQQNVEGK	UniProtKB:P24928				1.91543e+07	0	1.20097e-05	85.57	3.77449e-07	2	948.534
LNAVVNDFWAEISESVDK	UniProtKB:Q99460				3.27815e+06	0	1.37948e-06	85.55	1.11264e-06	2	1018.51
sVPAFIDISEEDQAAELR	UniProtKB:Q7L2H7	N-Term(Acetyl)			2.69553e+08	0	3.38707e-07	85.54	1.10236e-06	2	1016.51
aELGEADEAELQR	UniProtKB:Q9Y5J9	N-Term(Acetyl)			0	0	3.87189e-05	85.53	1.06963e-06	2	736.848
DQLQTFSEEHPVLLTEAPLNPR	UniProtKB:P61163				1199480554	0	1.02705e-05	85.51	9.51969e-07	2	1267.65
TQTVcNFTDGALVQHQEWDGK	UniProtKB:Q01469;UniProtKB:A8MUU1	C5(Carbamidomethyl)			1754480206	0	4.22738e-08	85.48	1.60228e-06	3	812.043
TLTAAAVSGAQPILSK	UniProtKB:O60664				2.61926e+08	0	2.72899e-05	85.47	3.3232e-07	2	764.445
ALLELQLEPEELYQTFQR	UniProtKB:P13639				8.53864e+08	0	8.33963e-07	85.47	7.46089e-07	2	1110.59
IFSGSSHQDLSQK	UniProtKB:P60891;UniProtKB:P21108				967828080	0	5.54659e-06	85.44	1.02959e-06	2	717.358
LFGNMEGDcPSDWK	UniProtKB:P02786	C9(Carbamidomethyl)			1.01673e+08	0	1.5194e-05	85.43	9.59643e-07	2	828.346
SSTAISSIAADGEFLHELEEK	UniProtKB:O75694				2.32777e+08	0	2.20822e-07	85.41	1.3295e-06	2	1117.55
VALRGEDVPLTEQTVSQVLQSAK	UniProtKB:P61923				1710230910	0	1.92967e-06	85.36	4.07209e-07	3	823.458
ELLVSALQELESSTSNSPSNK	UniProtKB:Q8WTW3				0	0	2.829e-05	85.32	1.07944e-06	2	1117.07
TVIGELPPASSGSALAANVcK	UniProtKB:Q86VP6	C20(Carbamidomethyl)			4.42974e+07	0	1.25814e-05	85.3	8.44784e-07	2	1021.54
DLDEDELLGNLSETELK	UniProtKB:Q9NYL9				153298336	0	1.69821e-07	85.28	1.3404e-06	2	966.971
EAATQAQQTLGSTIDK	UniProtKB:P47897				1.86801e+08	0	1.1857e-05	85.27	1.04677e-06	2	831.427
GYTLLSEGIDEMVGIIYKPK	UniProtKB:O75643				1.88079e+08	0	1.1692e-07	85.27	5.92847e-07	3	742.739
DINLQDEDWNEFNDINK	UniProtKB:Q6P2Q9				245546456	0	1.40768e-07	85.26	1.54481e-06	2	1061.47
mMcGAPSATQPATAETQHIADQVR	UniProtKB:P04080	N-Term(Acetyl); C3(Carbamidomethyl)			1709552438	0	3.98504e-08	85.25	1.75406e-06	2	1307.1
ENSETVVTGSLDDLVK	UniProtKB:Q9GZS3				267530233	0	5.9966e-06	85.23	1.13383e-06	2	853.432
LALSQNQQSSGAAGPTGKNEEK	UniProtKB:O95232				357367580	0	7.45793e-07	85.22	1.25489e-06	3	739.04
IGDVVGSSGANQQTSGK	UniProtKB:Q9Y263				6.16645e+07	0	4.38631e-05	85.21	1.16754e-06	2	802.9
VSGVDGYETEGIR	UniProtKB:Q14566				780765442	0	4.91506e-05	85.2	1.06997e-06	2	691.336
INMNGINNSSGMVDAR	UniProtKB:Q15819				94576290	0	2.98186e-06	85.2	1.31474e-06	2	846.897
LSAASTWLEDEGVGATTVMLK	UniProtKB:Q9Y4L1				1.54675e+08	0	1.92411e-08	85.14	1.23535e-06	2	1090.05
DMLEAGILDTYLGK	UniProtKB:P50990				3408100784	0	3.06023e-05	85.12	1.02203e-06	2	769.894
STNGDTFLGGEDFDQALLR	UniProtKB:P38646				369107276	0	6.60025e-07	85.12	1.52974e-06	2	1028.48
QGNGPVLVcAPSNIAVDQLTEK	UniProtKB:Q92900	C9(Carbamidomethyl)			7.58629e+07	0	8.80916e-06	85.12	1.10247e-06	2	1155.59
QPcPSESDIITEEDK	UniProtKB:O75475	C3(Carbamidomethyl)			3.83342e+07	0	2.6268e-05	85.09	1.30494e-06	2	874.383
EAQRDYLDFLDDEEDQGIYQSK	UniProtKB:P25205				5.75322e+08	0	1.56344e-07	85.09	1.84529e-06	3	893.064
NALQELQQIIITPIK	UniProtKB:Q5PRF9				9.9416e+07	0	7.88034e-06	85.07	1.09532e-07	2	861.522
NGGLGHMNIALLSDLTK	UniProtKB:P30048				1.20228e+09	0	5.37143e-05	85.07	7.35454e-07	2	877.473
LTSDPTDIPVVcLESDNGNIMIQK	UniProtKB:O43504	C12(Carbamidomethyl)			42066098	0	5.63729e-07	85.07	1.5319e-06	2	1330.15
TAQALSSGSGSQETK	UniProtKB:O95747				7.5902e+07	0	5.37143e-05	85.05	1.15274e-06	2	726.353
TGIVDISILTTGMSATSR	UniProtKB:P33991				5.82797e+07	0	4.88622e-05	85.01	6.81008e-07	2	911.996
NEAIQAAHDAVAQEGQcR	UniProtKB:P09936	C17(Carbamidomethyl)			3839355280	0	2.09156e-05	85.01	1.52955e-06	3	656.64
NDANPETHAFVTSPEIVTALAIAGTLK	UniProtKB:Q99798				2.67977e+06	0	9.20184e-07	84.99	5.97305e-07	3	927.502
SSNEVLNVIQGNTTVDELMMR	UniProtKB:Q9UNN5				58770458	0	2.4406e-08	84.98	1.47328e-06	2	1175.58
VSEFNVSSEGSGEK	UniProtKB:Q9BVJ6				82535155	0	1.50878e-05	84.95	1.18631e-06	2	728.332
DPAEGDGAQPEETPR	UniProtKB:Q14697				65841155	0	1.07027e-05	84.95	1.20566e-06	2	784.846
HLLQAPLDDAQEILQAR	UniProtKB:Q15437				226157835	0	9.26047e-06	84.95	6.30982e-07	3	644.355
DHASIQMNVAEVDK	UniProtKB:P63220				508217102	0	1.2792e-07	84.92	1.26346e-06	2	778.876
TTTLSGTAPAAGVVPSR	UniProtKB:P27816				1.23886e+08	0	1.01263e-05	84.92	7.2474e-07	2	793.435
GLPLGSAVSSPVLFSPVGR	UniProtKB:Q8WUM0				164043848	0	5.37143e-05	84.88	4.13511e-07	2	920.521
VcNFLASQVPFPSR	UniProtKB:Q99714	C2(Carbamidomethyl)			552101504	0	2.47224e-05	84.87	1.1489e-06	2	811.415
mFVLDEADEMLSR	UniProtKB:P60842;UniProtKB:Q14240	M1(Oxidation)			2.19464e+09	0	1.88439e-05	84.86	1.22291e-06	2	786.352
EQVLQPVSAELLELDIR	UniProtKB:P36915				0	0	9.47904e-06	84.86	5.84919e-07	2	976.537
LFSLELVDESGEIR	UniProtKB:P27694				236283256	0	4.65463e-05	84.81	9.94908e-07	2	803.922
FGGQLLSFDIGDQPVFEIPLSNVSQcTTGK	UniProtKB:Q08945	C26(Carbamidomethyl)			2.51736e+08	0	1.68576e-08	84.81	1.25276e-06	3	1085.56
EAAWAITNATSGGTPEQIR	UniProtKB:O60684;UniProtKB:O15131				1.17067e+08	0	5.93623e-07	84.8	1.38959e-06	2	986.99
DPTPSFYDLWAQEDPNAVLGR	UniProtKB:Q14137				0	0	2.38905e-05	84.8	1.85847e-06	2	1196.05
AGEAAELQDAEVESSAK	UniProtKB:Q9NZT2				54814032	0	1.36341e-06	84.79	1.44739e-06	2	852.901
NENGAPEDEENFEEAIK	UniProtKB:Q13564				1.00585e+08	0	1.32908e-05	84.77	1.5481e-06	2	967.921
WAIAQLNYADMLK	UniProtKB:Q14204				4.72942e+08	0	2.10437e-05	84.72	1.05419e-06	2	768.901
cLAQEVNIPDWIVDLR	UniProtKB:Q9Y4W2	C1(Carbamidomethyl)			55153212	0	3.88248e-05	84.7	1.1458e-06	2	971.003
THINIVVIGHVDSGK	UniProtKB:P68104;UniProtKB:Q05639;UniProtKB:Q5VTE0				2.41085e+08	0	1.15667e-05	84.68	5.55716e-07	3	530.302
EEIQDEEDDDDYVEEGEEEEEEEEGGLRGEK	UniProtKB:Q9BTT0				4.84845e+08	0	7.77951e-10	84.68	1.95394e-06	3	1220.15
THYSNIEANESEEVR	UniProtKB:P04632				1.92051e+08	0	5.37143e-05	84.67	1.53793e-06	3	593.27
ALNAGYILNGLTVSIPGLER	UniProtKB:Q9Y678				0	0	6.41367e-07	84.65	2.87239e-07	2	1036.1
EYFSTFGEVLMVQVK	UniProtKB:Q13148				1.10888e+07	0	3.62838e-05	84.64	1.21362e-06	2	888.955
[truncated: 22,370 more rows]

## Sheet: 1D 3 times 180 min Proteins
Mascot Score ≥ 20
Accession	Description	Score	Coverage	# Proteins	# Unique Peptides	# Peptides	# PSMs	Area	MW [kDa]
UniProtKB:P63261	Actin, cytoplasmic 2 OS=Homo sapiens GN=ACTG1 PE=1 SV=1	25083.5	75.73	1	1	24	629	6.01734e+10	41.7658
UniProtKB:CON_P60712	(Bos taurus) Actin, cytoplasmic 1	24391.5	75.73	1	1	24	604	6.01734e+10	41.7097
UniProtKB:P07437	Tubulin beta chain OS=Homo sapiens GN=TUBB PE=1 SV=2	20292.4	82.21	1	4	27	606	2.87674e+10	49.639
UniProtKB:P68363	Tubulin alpha-1B chain OS=Homo sapiens GN=TUBA1B PE=1 SV=1	17519.6	71.84	1	0	26	490	2.49086e+10	50.1196
Ensembl:CON_ENSBTAP00000016242	(Bos taurus) similar to alpha-tubulin I isoform 1	17422.7	70.07	1	0	23	480	2.49086e+10	50.1476
UniProtKB:P06733	Alpha-enolase OS=Homo sapiens GN=ENO1 PE=1 SV=2	17236	73.27	1	24	28	480	18104235804	47.1393
UniProtKB:P68371	Tubulin beta-2C chain OS=Homo sapiens GN=TUBB2C PE=1 SV=1	17072.8	77.75	1	1	25	537	2.87674e+10	49.799
UniProtKB:Q9BVA1	Tubulin beta-2B chain OS=Homo sapiens GN=TUBB2B PE=1 SV=1	15569.4	82.02	1	1	26	492	2.50428e+10	49.9209
UniProtKB:Q13885	Tubulin beta-2A chain OS=Homo sapiens GN=TUBB2A PE=1 SV=1	15533.4	73.26	1	1	25	489	2.50428e+10	49.875
UniProtKB:Q6S8J3	POTE ankyrin domain family member E OS=Homo sapiens GN=POTEE PE=1 SV=3	14656.1	7.91	1	0	7	308	3.70748e+10	121.286
UniProtKB:P68366	Tubulin alpha-4A chain OS=Homo sapiens GN=TUBA4A PE=1 SV=1	14435.3	47.99	1	0	19	380	1.59798e+10	49.8924
UniProtKB:P04406	Glyceraldehyde-3-phosphate dehydrogenase OS=Homo sapiens GN=GAPDH PE=1 SV=3	13932.9	63.28	1	11	17	372	18126666367	36.0304
UniProtKB:P09651	Heterogeneous nuclear ribonucleoprotein A1 OS=Homo sapiens GN=HNRNPA1 PE=1 SV=5	13357.6	59.14	1	3	20	413	1.20005e+10	38.7231
UniProtKB:Q9BQE3	Tubulin alpha-1C chain OS=Homo sapiens GN=TUBA1C PE=1 SV=1	13139.2	71.71	1	3	25	374	2.49086e+10	49.8635
UniProtKB:P06748	Nucleophosmin OS=Homo sapiens GN=NPM1 PE=1 SV=2	12818.4	67.01	1	15	15	350	2.4186e+10	32.5548
UniProtKB:P0C7M2	Putative heterogeneous nuclear ribonucleoprotein A1-like 3 OS=Homo sapiens GN=HNRPA1L3 PE=5 SV=1	12473.6	49.06	1	0	17	396	1.18903e+10	34.2023
UniProtKB:P07900	Heat shock protein HSP 90-alpha OS=Homo sapiens GN=HSP90AA1 PE=1 SV=5	11942.1	62.98	1	29	51	490	18902689489	84.6067
UniProtKB:Q71U36	Tubulin alpha-1A chain OS=Homo sapiens GN=TUBA1A PE=1 SV=1	11920.5	71.84	1	0	25	369	2.49086e+10	50.1036
UniProtKB:Q13509	Tubulin beta-3 chain OS=Homo sapiens GN=TUBB3 PE=1 SV=2	11456.6	43.33	1	2	18	334	1.59252e+10	50.4003
UniProtKB:P22626	Heterogeneous nuclear ribonucleoproteins A2/B1 OS=Homo sapiens GN=HNRNPA2B1 PE=1 SV=2	11277	62.89	1	20	20	275	1.46827e+10	37.4067
UniProtKB:P68104	Elongation factor 1-alpha 1 OS=Homo sapiens GN=EEF1A1 PE=1 SV=1	11266.6	51.73	1	0	17	372	1.41264e+10	50.1091
UniProtKB:Q5VTE0	Putative elongation factor 1-alpha-like 3 OS=Homo sapiens GN=EEF1AL3 PE=5 SV=1	11261	46.75	1	0	16	371	1.41264e+10	50.1532
UniProtKB:P08107	Heat shock 70 kDa protein 1A/1B OS=Homo sapiens GN=HSPA1A PE=1 SV=5	10322.1	65.52	1	15	31	298	22914425428	70.009
UniProtKB:Q9NY65	Tubulin alpha-8 chain OS=Homo sapiens GN=TUBA8 PE=1 SV=1	10077.4	33.63	1	0	11	242	1.52977e+10	50.0616
UniProtKB:P13639	Elongation factor 2 OS=Homo sapiens GN=EEF2 PE=1 SV=4	9514.37	72.38	1	58	58	385	6.9326e+09	95.277
UniProtKB:P04350	Tubulin beta-4 chain OS=Homo sapiens GN=TUBB4 PE=1 SV=2	9326.88	77.03	1	3	23	353	2.87674e+10	49.5539
UniProtKB:P08238	Heat shock protein HSP 90-beta OS=Homo sapiens GN=HSP90AB1 PE=1 SV=4	9199.18	59.53	1	17	47	383	18902689489	83.2121
UniProtKB:P35579	Myosin-9 OS=Homo sapiens GN=MYH9 PE=1 SV=4	9120.08	52.6	1	75	97	286	1.8023e+09	226.392
UniProtKB:P07195	L-lactate dehydrogenase B chain OS=Homo sapiens GN=LDHB PE=1 SV=2	8931.78	54.79	1	16	18	229	1.84564e+10	36.6151
UniProtKB:Q13748	Tubulin alpha-3C/D chain OS=Homo sapiens GN=TUBA3C PE=1 SV=3	8920.55	50.67	1	0	16	249	18510158410	49.9276
UniProtKB:Q6PEY2	Tubulin alpha-3E chain OS=Homo sapiens GN=TUBA3E PE=1 SV=2	8434.93	38.89	1	0	11	223	18510158410	49.8266
UniProtKB:P11142	Heat shock cognate 71 kDa protein OS=Homo sapiens GN=HSPA8 PE=1 SV=1	8085.66	52.01	1	18	28	290	2.28562e+10	70.8542
UniProtKB:P78371	T-complex protein 1 subunit beta OS=Homo sapiens GN=CCT2 PE=1 SV=4	8014.09	75.89	1	32	32	227	4.03839e+09	57.4521
UniProtKB:P12277	Creatine kinase B-type OS=Homo sapiens GN=CKB PE=1 SV=1	7939.79	67.45	1	19	19	260	1.51564e+10	42.6173
UniProtKB:Q32P51	Heterogeneous nuclear ribonucleoprotein A1-like 2 OS=Homo sapiens GN=HNRNPA1L2 PE=2 SV=2	7776.78	32.81	1	0	12	220	1.18903e+10	34.2043
UniProtKB:Q00610	Clathrin heavy chain 1 OS=Homo sapiens GN=CLTC PE=1 SV=5	7464.95	55.1	1	61	77	286	3.23545e+09	191.493
UniProtKB:P14618	Pyruvate kinase isozymes M1/M2 OS=Homo sapiens GN=PKM2 PE=1 SV=4	7418.52	72.69	1	32	33	249	9.08753e+09	57.9
UniProtKB:P34931	Heat shock 70 kDa protein 1-like OS=Homo sapiens GN=HSPA1L PE=1 SV=2	6969.43	31.36	1	1	14	156	2.28906e+10	70.3313
UniProtKB:P49327	Fatty acid synthase OS=Homo sapiens GN=FASN PE=1 SV=3	6950.44	44.48	1	85	85	277	3.97689e+09	273.254
UniProtKB:P61978	Heterogeneous nuclear ribonucleoprotein K OS=Homo sapiens GN=HNRNPK PE=1 SV=1	6912.86	68.25	1	26	26	273	9.59775e+09	50.9444
UniProtKB:P10809	60 kDa heat shock protein, mitochondrial OS=Homo sapiens GN=HSPD1 PE=1 SV=2	6820.49	66.32	1	36	36	230	5.82886e+09	61.0164
UniProtKB:P08670	Vimentin OS=Homo sapiens GN=VIM PE=1 SV=4	6545.71	68.67	1	32	36	207	7.4013e+09	53.6191
UniProtKB:P62807	Histone H2B type 1-C/E/F/G/I OS=Homo sapiens GN=HIST1H2BC PE=1 SV=4	6458.24	35.71	1	0	5	143	7.04508e+10	13.8976
UniProtKB:P58876	Histone H2B type 1-D OS=Homo sapiens GN=HIST1H2BD PE=1 SV=2	6458.24	35.71	1	0	5	143	7.04508e+10	13.9276
UniProtKB:Q93079	Histone H2B type 1-H OS=Homo sapiens GN=HIST1H2BH PE=1 SV=3	6458.24	35.71	1	0	5	143	7.04508e+10	13.8835
UniProtKB:O60814	Histone H2B type 1-K OS=Homo sapiens GN=HIST1H2BK PE=1 SV=3	6458.24	35.71	1	0	5	143	7.04508e+10	13.8816
UniProtKB:Q99880	Histone H2B type 1-L OS=Homo sapiens GN=HIST1H2BL PE=1 SV=3	6458.24	35.71	1	0	5	143	7.04508e+10	13.9436
UniProtKB:Q99879	Histone H2B type 1-M OS=Homo sapiens GN=HIST1H2BM PE=1 SV=3	6458.24	35.71	1	0	5	143	7.04508e+10	13.9806
UniProtKB:Q99877	Histone H2B type 1-N OS=Homo sapiens GN=HIST1H2BN PE=1 SV=3	6458.24	35.71	1	0	5	143	7.04508e+10	13.9136
UniProtKB:Q5QNW6	Histone H2B type 2-F OS=Homo sapiens GN=HIST2H2BF PE=1 SV=3	6458.24	35.71	1	0	5	143	7.04508e+10	13.9116
UniProtKB:P57053	Histone H2B type F-S OS=Homo sapiens GN=H2BFS PE=1 SV=2	6458.24	35.71	1	0	5	143	7.04508e+10	13.9356
UniProtKB:P33778	Histone H2B type 1-B OS=Homo sapiens GN=HIST1H2BB PE=1 SV=2	6390.3	35.71	1	0	5	141	6.7816e+10	13.9416
UniProtKB:P06899	Histone H2B type 1-J OS=Homo sapiens GN=HIST1H2BJ PE=1 SV=3	6390.3	35.71	1	0	5	141	6.7816e+10	13.8956
UniProtKB:P23527	Histone H2B type 1-O OS=Homo sapiens GN=HIST1H2BO PE=1 SV=3	6390.3	35.71	1	0	5	141	6.7816e+10	13.8976
UniProtKB:Q16778	Histone H2B type 2-E OS=Homo sapiens GN=HIST2H2BE PE=1 SV=3	6390.3	35.71	1	0	5	141	6.7816e+10	13.9116
UniProtKB:Q8N257	Histone H2B type 3-B OS=Homo sapiens GN=HIST3H2BB PE=1 SV=3	6390.3	35.71	1	0	5	141	6.7816e+10	13.8995
UniProtKB:Q05639	Elongation factor 1-alpha 2 OS=Homo sapiens GN=EEF1A2 PE=1 SV=1	6309.8	28.51	1	2	10	239	13268539343	50.4383
UniProtKB:Q14204	Cytoplasmic dynein 1 heavy chain 1 OS=Homo sapiens GN=DYNC1H1 PE=1 SV=5	6183.41	34.24	1	125	125	262	7.93154e+08	532.072
UniProtKB:P35580	Myosin-10 OS=Homo sapiens GN=MYH10 PE=1 SV=3	5990.33	45.65	1	55	75	187	1551389230	228.858
UniProtKB:P60174	Triosephosphate isomerase OS=Homo sapiens GN=TPI1 PE=1 SV=2	5961.29	83.53	1	17	19	218	9725654122	26.6527
UniProtKB:P19338	Nucleolin OS=Homo sapiens GN=NCL PE=1 SV=3	5888.81	31.13	1	22	22	189	7057640853	76.5684
UniProtKB:Q9H853	Putative tubulin-like protein alpha-4B OS=Homo sapiens GN=TUBA4B PE=5 SV=2	5793.35	10.79	1	1	2	131	6700497955	27.5337
UniProtKB:P68032	Actin, alpha cardiac muscle 1 OS=Homo sapiens GN=ACTC1 PE=1 SV=1	5353.18	43.77	1	0	15	266	43899408968	41.9919
UniProtKB:P68133	Actin, alpha skeletal muscle OS=Homo sapiens GN=ACTA1 PE=1 SV=1	5287.52	37.93	1	0	14	264	43899408968	42.0239
UniProtKB:P55072	Transitional endoplasmic reticulum ATPase OS=Homo sapiens GN=VCP PE=1 SV=4	5019.44	59.8	1	46	46	167	2.27645e+09	89.2657
UniProtKB:P21333	Filamin-A OS=Homo sapiens GN=FLNA PE=1 SV=4	4997.8	41.44	1	71	79	190	7.27256e+08	280.564
UniProtKB:Q9Y490	Talin-1 OS=Homo sapiens GN=TLN1 PE=1 SV=3	4958.31	38.13	1	59	63	140	974883401	269.599
UniProtKB:P13929	Beta-enolase OS=Homo sapiens GN=ENO3 PE=1 SV=4	4837.59	19.35	1	1	6	137	5.75537e+09	46.9023
UniProtKB:O75643	U5 small nuclear ribonucleoprotein 200 kDa helicase OS=Homo sapiens GN=SNRNP200 PE=1 SV=2	4770.19	41.01	1	68	68	185	1.04051e+09	244.353
UniProtKB:P62258	14-3-3 protein epsilon OS=Homo sapiens GN=YWHAE PE=1 SV=1	4508.43	77.65	1	19	21	211	2.95275e+10	29.1554
UniProtKB:P63241	Eukaryotic translation initiation factor 5A-1 OS=Homo sapiens GN=EIF5A PE=1 SV=2	4470.64	69.48	1	3	11	121	5.51144e+09	16.8214
UniProtKB:P62736	Actin, aortic smooth muscle OS=Homo sapiens GN=ACTA2 PE=1 SV=1	4413.75	40.85	1	0	14	198	43899408968	41.9818
UniProtKB:P63267	Actin, gamma-enteric smooth muscle OS=Homo sapiens GN=ACTG2 PE=1 SV=1	4413.75	40.96	1	0	14	198	43899408968	41.8498
UniProtKB:P09104	Gamma-enolase OS=Homo sapiens GN=ENO2 PE=1 SV=3	4394.95	33.18	1	5	11	129	2.39842e+09	47.239
UniProtKB:P52272	Heterogeneous nuclear ribonucleoprotein M OS=Homo sapiens GN=HNRNPM PE=1 SV=3	4385.12	65.62	1	37	37	159	3.23935e+09	77.4643
UniProtKB:P26599	Polypyrimidine tract-binding protein 1 OS=Homo sapiens GN=PTBP1 PE=1 SV=1	4343.44	53.3	1	15	18	118	2.97794e+09	57.1856
UniProtKB:P23528	Cofilin-1 OS=Homo sapiens GN=CFL1 PE=1 SV=3	4315.06	71.69	1	10	15	152	9.93425e+09	18.4907
UniProtKB:Q08211	ATP-dependent RNA helicase A OS=Homo sapiens GN=DHX9 PE=1 SV=4	4301.27	45.35	1	43	43	152	3.93756e+09	140.869
UniProtKB:P22314	Ubiquitin-like modifier-activating enzyme 1 OS=Homo sapiens GN=UBA1 PE=1 SV=3	4278.8	45.65	1	37	37	148	4.17561e+09	117.774
UniProtKB:Q13813	Spectrin alpha chain, brain OS=Homo sapiens GN=SPTAN1 PE=1 SV=3	4122.29	44.26	1	86	86	169	1346171679	284.364
UniProtKB:P11021	78 kDa glucose-regulated protein OS=Homo sapiens GN=HSPA5 PE=1 SV=2	4114.66	50.15	1	30	32	138	9.31069e+09	72.2884
UniProtKB:P00558	Phosphoglycerate kinase 1 OS=Homo sapiens GN=PGK1 PE=1 SV=3	4058.12	74.82	1	22	27	138	4.95572e+09	44.5861
UniProtKB:Q00839	Heterogeneous nuclear ribonucleoprotein U OS=Homo sapiens GN=HNRNPU PE=1 SV=6	4008.63	40.24	1	28	28	136	7323207476	90.528
UniProtKB:P17987	T-complex protein 1 subunit alpha OS=Homo sapiens GN=TCP1 PE=1 SV=1	3968.14	61.15	1	27	27	124	2.18759e+09	60.3056
UniProtKB:Q14974	Importin subunit beta-1 OS=Homo sapiens GN=KPNB1 PE=1 SV=2	3877.23	45.89	1	34	34	146	3.69008e+09	97.108
UniProtKB:P13797	Plastin-3 OS=Homo sapiens GN=PLS3 PE=1 SV=4	3845.37	62.54	1	26	33	129	3.599e+09	70.7662
UniProtKB:P04075	Fructose-bisphosphate aldolase A OS=Homo sapiens GN=ALDOA PE=1 SV=2	3818.37	79.67	1	21	23	142	1.07938e+10	39.3953
UniProtKB:P31943	Heterogeneous nuclear ribonucleoprotein H OS=Homo sapiens GN=HNRNPH1 PE=1 SV=4	3802.66	52.56	1	12	18	136	6.59551e+09	49.1984
UniProtKB:CON_P10096	(Bos taurus) Glyceraldehyde-3-phosphate dehydrogenase	3760.46	31.23	1	2	8	110	1.22893e+10	35.8453
UniProtKB:P60842	Eukaryotic initiation factor 4A-I OS=Homo sapiens GN=EIF4A1 PE=1 SV=1	3727.11	55.67	1	11	20	122	7.07203e+09	46.1246
UniProtKB:P48643	T-complex protein 1 subunit epsilon OS=Homo sapiens GN=CCT5 PE=1 SV=1	3725.42	71.72	1	36	36	136	3.41767e+09	59.6328
UniProtKB:O00410	Importin-5 OS=Homo sapiens GN=IPO5 PE=1 SV=4	3635.14	41.93	1	29	31	119	1.5137e+09	123.55
UniProtKB:O75369	Filamin-B OS=Homo sapiens GN=FLNB PE=1 SV=2	3597.66	34.4	1	57	65	135	574660897	277.99
UniProtKB:P50991	T-complex protein 1 subunit delta OS=Homo sapiens GN=CCT4 PE=1 SV=4	3580.73	66.79	1	31	31	123	2.06735e+09	57.8878
UniProtKB:P13010	X-ray repair cross-complementing protein 5 OS=Homo sapiens GN=XRCC5 PE=1 SV=3	3530.2	42.35	1	31	31	128	3.43733e+09	82.6523
UniProtKB:P34932	Heat shock 70 kDa protein 4 OS=Homo sapiens GN=HSPA4 PE=1 SV=4	3529.33	49.76	1	33	35	117	2.43586e+09	94.2712
UniProtKB:Q13263	Transcription intermediary factor 1-beta OS=Homo sapiens GN=TRIM28 PE=1 SV=5	3502.67	62.4	1	29	29	110	1.40915e+09	88.4934
UniProtKB:Q99832	T-complex protein 1 subunit eta OS=Homo sapiens GN=CCT7 PE=1 SV=2	3455.7	62.25	1	25	25	88	1.67323e+09	59.3289
UniProtKB:P05455	Lupus La protein OS=Homo sapiens GN=SSB PE=1 SV=2	3451.94	57.11	1	29	29	120	1.90158e+09	46.8082
UniProtKB:CON_P15636	Protease I precursor Lysyl endopeptidase Achromobacter lyticus.	3436.79	25.11	1	11	11	90	1.90982e+10	68.0834
UniProtKB:P63104	14-3-3 protein zeta/delta OS=Homo sapiens GN=YWHAZ PE=1 SV=1	3409.6	72.24	1	16	20	137	1.86569e+10	27.7277
UniProtKB:P50990	T-complex protein 1 subunit theta OS=Homo sapiens GN=CCT8 PE=1 SV=4	3369.46	67.34	1	35	35	132	3915851368	59.5825
UniProtKB:P30153	Serine/threonine-protein phosphatase 2A 65 kDa regulatory subunit A alpha isoform OS=Homo sapiens GN=PPP2R1A PE=1 SV=4	3366.88	50.42	1	18	23	89	1878992061	65.2669
UniProtKB:P62937	Peptidyl-prolyl cis-trans isomerase A OS=Homo sapiens GN=PPIA PE=1 SV=2	3353.38	63.03	1	7	9	100	21577505355	18.0009
UniProtKB:Q01082	Spectrin beta chain, brain 1 OS=Homo sapiens GN=SPTBN1 PE=1 SV=2	3262.91	38.16	1	62	66	123	3.77328e+08	274.439
UniProtKB:A6NNZ2	Tubulin beta-8 chain B OS=Homo sapiens PE=1 SV=1	3222.03	20.95	1	0	8	167	1.78373e+10	49.5406
UniProtKB:P67809	Nuclease-sensitive element-binding protein 1 OS=Homo sapiens GN=YBX1 PE=1 SV=3	3221.72	66.05	1	9	15	78	4389964369	35.9027
UniProtKB:Q9BUF5	Tubulin beta-6 chain OS=Homo sapiens GN=TUBB6 PE=1 SV=1	3213.38	71.75	1	8	20	139	1.82228e+10	49.825
UniProtKB:P51991	Heterogeneous nuclear ribonucleoprotein A3 OS=Homo sapiens GN=HNRNPA3 PE=1 SV=2	3140.87	35.45	1	13	15	127	3433787177	39.5706
UniProtKB:P11940	Polyadenylate-binding protein 1 OS=Homo sapiens GN=PABPC1 PE=1 SV=2	3065.48	47.33	1	4	22	102	2.09649e+09	70.6259
UniProtKB:Q92598	Heat shock protein 105 kDa OS=Homo sapiens GN=HSPH1 PE=1 SV=1	3065.36	61.89	1	34	37	104	2.00641e+09	96.8037
UniProtKB:P49321	Nuclear autoantigenic sperm protein OS=Homo sapiens GN=NASP PE=1 SV=2	2996.85	47.46	1	27	27	89	1.23397e+09	85.1861
UniProtKB:P26641	Elongation factor 1-gamma OS=Homo sapiens GN=EEF1G PE=1 SV=3	2901.8	58.35	1	24	24	117	5.75628e+09	50.0871
UniProtKB:O43707	Alpha-actinin-4 OS=Homo sapiens GN=ACTN4 PE=1 SV=2	2875.53	54.01	1	27	42	116	1.21567e+09	104.788
UniProtKB:P55060	Exportin-2 OS=Homo sapiens GN=CSE1L PE=1 SV=3	2868.79	45.21	1	39	39	116	1.87371e+09	110.346
UniProtKB:Q58FF7	Putative heat shock protein HSP 90-beta-3 OS=Homo sapiens GN=HSP90AB3P PE=5 SV=1	2859.21	21.78	1	0	20	165	1.35826e+10	68.282
UniProtKB:P49792	E3 SUMO-protein ligase RanBP2 OS=Homo sapiens GN=RANBP2 PE=1 SV=2	2792.34	23.51	1	37	52	95	3.13928e+08	357.974
UniProtKB:P50395	Rab GDP dissociation inhibitor beta OS=Homo sapiens GN=GDI2 PE=1 SV=2	2766.16	68.76	1	15	24	103	1.9417e+09	50.6309
UniProtKB:P40227	T-complex protein 1 subunit zeta OS=Homo sapiens GN=CCT6A PE=1 SV=3	2757.99	50.66	1	21	24	105	2.1251e+09	57.9876
UniProtKB:P49368	T-complex protein 1 subunit gamma OS=Homo sapiens GN=CCT3 PE=1 SV=4	2750.15	64.95	1	33	33	118	4.04802e+09	60.4953
UniProtKB:O14980	Exportin-1 OS=Homo sapiens GN=XPO1 PE=1 SV=1	2732.44	43.51	1	36	36	111	1.40501e+09	123.306
UniProtKB:Q92945	Far upstream element-binding protein 2 OS=Homo sapiens GN=KHSRP PE=1 SV=4	2723.81	54.29	1	30	31	100	2.66412e+09	73.07
UniProtKB:P12270	Nucleoprotein TPR OS=Homo sapiens GN=TPR PE=1 SV=3	2709.74	26.83	1	50	50	110	7.36882e+08	267.131
UniProtKB:Q13838	Spliceosome RNA helicase BAT1 OS=Homo sapiens GN=BAT1 PE=1 SV=1	2698.17	54.44	1	9	19	109	3277847152	48.9599
UniProtKB:A5A3E0	POTE ankyrin domain family member F OS=Homo sapiens GN=POTEF PE=1 SV=2	2641.15	7.91	1	1	7	135	3.70748e+10	121.367
UniProtKB:P49588	Alanyl-tRNA synthetase, cytoplasmic OS=Homo sapiens GN=AARS PE=1 SV=2	2638.55	41.32	1	30	30	90	7.0874e+08	106.743
UniProtKB:Q15365	Poly(rC)-binding protein 1 OS=Homo sapiens GN=PCBP1 PE=1 SV=2	2615.19	63.76	1	11	16	87	3.63016e+09	37.4739
UniProtKB:P39023	60S ribosomal protein L3 OS=Homo sapiens GN=RPL3 PE=1 SV=2	2607.57	43.18	1	14	16	90	3072861924	46.0798
UniProtKB:P27348	14-3-3 protein theta OS=Homo sapiens GN=YWHAQ PE=1 SV=1	2603.27	66.12	1	13	17	102	1.92294e+10	27.7468
UniProtKB:P00441	Superoxide dismutase [Cu-Zn] OS=Homo sapiens GN=SOD1 PE=1 SV=2	2585.69	53.9	1	5	5	64	6.36652e+09	15.9259
UniProtKB:P30101	Protein disulfide-isomerase A3 OS=Homo sapiens GN=PDIA3 PE=1 SV=4	2581.71	57.43	1	25	25	99	1859953686	56.7468
UniProtKB:P31150	Rab GDP dissociation inhibitor alpha OS=Homo sapiens GN=GDI1 PE=1 SV=2	2542.67	72.48	1	16	25	87	1.03921e+09	50.5501
UniProtKB:P07910	Heterogeneous nuclear ribonucleoproteins C1/C2 OS=Homo sapiens GN=HNRNPC PE=1 SV=4	2537.53	38.89	1	7	14	101	7.13031e+09	33.6495
UniProtKB:P22102	Trifunctional purine biosynthetic protein adenosine-3 OS=Homo sapiens GN=GART PE=1 SV=1	2497.69	43.86	1	32	32	90	1.28787e+09	107.699
UniProtKB:P08758	Annexin A5 OS=Homo sapiens GN=ANXA5 PE=1 SV=2	2495.34	61.56	1	18	18	64	2.00532e+09	35.9144
UniProtKB:P14625	Endoplasmin OS=Homo sapiens GN=HSP90B1 PE=1 SV=1	2489.45	50.31	1	32	37	106	6.25293e+09	92.4113
UniProtKB:Q6P2Q9	Pre-mRNA-processing-splicing factor 8 OS=Homo sapiens GN=PRPF8 PE=1 SV=2	2476.66	36.1	1	69	69	132	7.21984e+08	273.427
UniProtKB:P23246	Splicing factor, proline- and glutamine-rich OS=Homo sapiens GN=SFPQ PE=1 SV=2	2464.15	42.01	1	23	24	96	3.88817e+09	76.1016
UniProtKB:P53396	ATP-citrate synthase OS=Homo sapiens GN=ACLY PE=1 SV=3	2446.22	45.69	1	41	41	103	1621508886	120.762
UniProtKB:P00338	L-lactate dehydrogenase A chain OS=Homo sapiens GN=LDHA PE=1 SV=2	2430.23	61.75	1	17	20	108	8.24498e+09	36.6654
UniProtKB:P20700	Lamin-B1 OS=Homo sapiens GN=LMNB1 PE=1 SV=2	2425.07	59.56	1	39	41	105	1.56281e+09	66.3676
UniProtKB:Q14203	Dynactin subunit 1 OS=Homo sapiens GN=DCTN1 PE=1 SV=3	2423.83	37.09	1	32	32	73	9.56349e+08	141.607
UniProtKB:Q12905	Interleukin enhancer-binding factor 2 OS=Homo sapiens GN=ILF2 PE=1 SV=2	2379.59	71.79	1	16	16	65	2.38e+09	43.0352
UniProtKB:Q3ZCM7	Tubulin beta-8 chain OS=Homo sapiens GN=TUBB8 PE=1 SV=2	2357.01	17.12	1	0	8	152	1.15147e+10	49.7439
UniProtKB:Q15233	Non-POU domain-containing octamer-binding protein OS=Homo sapiens GN=NONO PE=1 SV=4	2341.76	55.41	1	22	24	108	2922824266	54.1973
UniProtKB:Q9Y281	Cofilin-2 OS=Homo sapiens GN=CFL2 PE=1 SV=1	2333.96	54.22	1	5	10	75	3.80453e+09	18.7249
UniProtKB:P40926	Malate dehydrogenase, mitochondrial OS=Homo sapiens GN=MDH2 PE=1 SV=3	2309.64	60.36	1	16	16	71	4.35679e+09	35.4807
UniProtKB:P14866	Heterogeneous nuclear ribonucleoprotein L OS=Homo sapiens GN=HNRNPL PE=1 SV=2	2298.59	53.31	1	18	19	81	3.17584e+09	64.0924
UniProtKB:Q12906	Interleukin enhancer-binding factor 3 OS=Homo sapiens GN=ILF3 PE=1 SV=3	2288.2	45.19	1	27	29	98	1.57208e+09	95.2791
UniProtKB:Q9UQ35	Serine/arginine repetitive matrix protein 2 OS=Homo sapiens GN=SRRM2 PE=1 SV=2	2277.43	20.75	1	36	36	80	1038542583	299.438
UniProtKB:P29401	Transketolase OS=Homo sapiens GN=TKT PE=1 SV=3	2274.53	54.41	1	25	25	84	2492536983	67.8347
UniProtKB:P30041	Peroxiredoxin-6 OS=Homo sapiens GN=PRDX6 PE=1 SV=3	2265.79	79.02	1	22	22	86	3.28325e+09	25.0192
UniProtKB:P13667	Protein disulfide-isomerase A4 OS=Homo sapiens GN=PDIA4 PE=1 SV=2	2262.08	51.16	1	29	29	75	7.83584e+08	72.887
UniProtKB:Q9BYX7	Putative beta-actin-like protein 3 OS=Homo sapiens GN=POTEKP PE=5 SV=1	2259.15	15.47	1	1	5	114	23575108888	41.9888
UniProtKB:Q13310	Polyadenylate-binding protein 4 OS=Homo sapiens GN=PABPC4 PE=1 SV=1	2255.74	35.25	1	11	19	68	2.06149e+09	70.7381
UniProtKB:Q86VP6	Cullin-associated NEDD8-dissociated protein 1 OS=Homo sapiens GN=CAND1 PE=1 SV=2	2252.22	36.59	1	36	37	112	1.0722e+09	136.289
UniProtKB:P16989	DNA-binding protein A OS=Homo sapiens GN=CSDA PE=1 SV=4	2246.66	52.15	1	8	14	53	1.09293e+09	40.066
UniProtKB:Q15393	Splicing factor 3B subunit 3 OS=Homo sapiens GN=SF3B3 PE=1 SV=4	2192.89	27.77	1	26	26	75	9.22318e+08	135.492
UniProtKB:O95373	Importin-7 OS=Homo sapiens GN=IPO7 PE=1 SV=1	2188.13	33.24	1	24	25	89	7.08095e+08	119.44
UniProtKB:P07737	Profilin-1 OS=Homo sapiens GN=PFN1 PE=1 SV=2	2185.7	88.57	1	6	10	86	1.02732e+10	15.0446
UniProtKB:O43175	D-3-phosphoglycerate dehydrogenase OS=Homo sapiens GN=PHGDH PE=1 SV=4	2161.33	46.15	1	21	21	90	2.49432e+09	56.6144
UniProtKB:Q92616	Translational activator GCN1 OS=Homo sapiens GN=GCN1L1 PE=1 SV=6	2149.48	24.86	1	48	48	94	5.9289e+08	292.572
UniProtKB:Q15029	116 kDa U5 small nuclear ribonucleoprotein component OS=Homo sapiens GN=EFTUD2 PE=1 SV=1	2148.72	44.44	1	33	33	82	9.92516e+08	109.366
UniProtKB:P13489	Ribonuclease inhibitor OS=Homo sapiens GN=RNH1 PE=1 SV=2	2147.4	67.03	1	19	19	55	819070818	49.9411
UniProtKB:P25205	DNA replication licensing factor MCM3 OS=Homo sapiens GN=MCM3 PE=1 SV=3	2134.02	49.13	1	32	32	91	9.84785e+08	90.924
UniProtKB:P31948	Stress-induced-phosphoprotein 1 OS=Homo sapiens GN=STIP1 PE=1 SV=1	2131.39	49.54	1	27	27	102	3.74713e+09	62.5994
UniProtKB:P12814	Alpha-actinin-1 OS=Homo sapiens GN=ACTN1 PE=1 SV=2	2128.9	47.87	1	20	34	84	1.14383e+09	102.993
UniProtKB:Q92841	Probable ATP-dependent RNA helicase DDX17 OS=Homo sapiens GN=DDX17 PE=1 SV=1	2124.55	48.31	1	21	29	89	1.89406e+09	72.326
UniProtKB:P54577	Tyrosyl-tRNA synthetase, cytoplasmic OS=Homo sapiens GN=YARS PE=1 SV=4	2123.66	78.22	1	39	39	112	1.03821e+09	59.1061
UniProtKB:P52292	Importin subunit alpha-2 OS=Homo sapiens GN=KPNA2 PE=1 SV=1	2112.2	43.67	1	16	16	54	1.32245e+09	57.8259
UniProtKB:P12268	Inosine-5'-monophosphate dehydrogenase 2 OS=Homo sapiens GN=IMPDH2 PE=1 SV=2	2091.55	48.44	1	22	23	73	1.54972e+09	55.7696
UniProtKB:P08865	40S ribosomal protein SA OS=Homo sapiens GN=RPSA PE=1 SV=4	2088.1	58.64	1	14	14	63	7176786559	32.8334
UniProtKB:Q15366	Poly(rC)-binding protein 2 OS=Homo sapiens GN=PCBP2 PE=1 SV=1	2085.61	52.6	1	7	13	78	4.65135e+09	38.5556
UniProtKB:Q9UQ80	Proliferation-associated protein 2G4 OS=Homo sapiens GN=PA2G4 PE=1 SV=3	2076.66	64.97	1	23	23	84	2.8622e+09	43.7592
UniProtKB:P31946	14-3-3 protein beta/alpha OS=Homo sapiens GN=YWHAB PE=1 SV=3	2070.95	60.57	1	7	13	89	1.64521e+10	28.0648
UniProtKB:P06576	ATP synthase subunit beta, mitochondrial OS=Homo sapiens GN=ATP5B PE=1 SV=3	2070.41	49.15	1	18	18	71	1.84541e+09	56.5246
UniProtKB:P12956	X-ray repair cross-complementing protein 6 OS=Homo sapiens GN=XRCC6 PE=1 SV=2	2059.08	45.81	1	25	25	79	1.26538e+09	69.7991
UniProtKB:P43243	Matrin-3 OS=Homo sapiens GN=MATR3 PE=1 SV=2	2048.1	44.16	1	34	34	104	2926623868	94.5648
UniProtKB:P27694	Replication protein A 70 kDa DNA-binding subunit OS=Homo sapiens GN=RPA1 PE=1 SV=2	2040.94	42.21	1	25	25	70	6.38931e+08	68.0953
UniProtKB:Q9BTT0	Acidic leucine-rich nuclear phosphoprotein 32 family member E OS=Homo sapiens GN=ANP32E PE=1 SV=1	2022.63	42.91	1	9	9	52	1.51649e+09	30.6738
UniProtKB:Q9Y265	RuvB-like 1 OS=Homo sapiens GN=RUVBL1 PE=1 SV=1	2013.25	57.89	1	18	18	70	2.16565e+09	50.1963
UniProtKB:Q01130	Serine/arginine-rich splicing factor 2 OS=Homo sapiens GN=SRSF2 PE=1 SV=4	2012.51	22.17	1	3	5	37	1.8773e+09	25.4612
UniProtKB:Q15181	Inorganic pyrophosphatase OS=Homo sapiens GN=PPA1 PE=1 SV=2	2011.96	73.01	1	15	15	64	2105561432	32.6392
UniProtKB:O60506	Heterogeneous nuclear ribonucleoprotein Q OS=Homo sapiens GN=SYNCRIP PE=1 SV=2	2011.27	41.25	1	15	21	73	1151046195	69.5596
UniProtKB:P38646	Stress-70 protein, mitochondrial OS=Homo sapiens GN=HSPA9 PE=1 SV=2	1981.81	48.31	1	30	30	79	1.41672e+09	73.6348
UniProtKB:P07237	Protein disulfide-isomerase OS=Homo sapiens GN=P4HB PE=1 SV=3	1980.35	65.16	1	29	29	89	1.20794e+09	57.0807
UniProtKB:P62081	40S ribosomal protein S7 OS=Homo sapiens GN=RPS7 PE=1 SV=1	1922.57	50.52	1	7	7	61	5.90114e+09	22.1133
UniProtKB:Q7Z6Z7	E3 ubiquitin-protein ligase HUWE1 OS=Homo sapiens GN=HUWE1 PE=1 SV=3	1913.18	16.39	1	48	48	84	4.49464e+08	481.589
UniProtKB:P18206	Vinculin OS=Homo sapiens GN=VCL PE=1 SV=4	1907.57	39.68	1	35	35	78	5.17471e+08	123.722
UniProtKB:Q02878	60S ribosomal protein L6 OS=Homo sapiens GN=RPL6 PE=1 SV=3	1899.49	47.22	1	18	18	77	3.41344e+09	32.7076
UniProtKB:Q99497	Protein DJ-1 OS=Homo sapiens GN=PARK7 PE=1 SV=2	1893.28	70.37	1	12	12	61	3621292988	19.8785
UniProtKB:Q6IS14	Eukaryotic translation initiation factor 5A-1-like OS=Homo sapiens GN=EIF5AL1 PE=1 SV=2	1892.64	46.1	1	0	7	66	5.50334e+09	16.7623
UniProtKB:Q16531	DNA damage-binding protein 1 OS=Homo sapiens GN=DDB1 PE=1 SV=1	1889.9	40.44	1	38	38	103	6.73739e+08	126.887
UniProtKB:P63244	Guanine nucleotide-binding protein subunit beta-2-like 1 OS=Homo sapiens GN=GNB2L1 PE=1 SV=3	1878.11	70.98	1	21	21	74	2.29074e+09	35.0546
UniProtKB:P33991	DNA replication licensing factor MCM4 OS=Homo sapiens GN=MCM4 PE=1 SV=5	1877.22	42.64	1	29	30	75	7.96914e+08	96.4976
UniProtKB:P62979	Ubiquitin-40S ribosomal protein S27a OS=Homo sapiens GN=RPS27A PE=1 SV=2	1876.42	52.56	1	3	8	111	2.42822e+10	17.9535
UniProtKB:P27708	CAD protein OS=Homo sapiens GN=CAD PE=1 SV=3	1869.68	24.54	1	35	35	71	5.44516e+08	242.829
UniProtKB:Q562R1	Beta-actin-like protein 2 OS=Homo sapiens GN=ACTBL2 PE=1 SV=2	1864.14	26.6	1	2	8	86	3.05936e+10	41.976
UniProtKB:Q6FI13	Histone H2A type 2-A OS=Homo sapiens GN=HIST2H2AA3 PE=1 SV=3	1857.43	55.38	1	0	6	87	7.12124e+10	14.0869
UniProtKB:Q16777	Histone H2A type 2-C OS=Homo sapiens GN=HIST2H2AC PE=1 SV=4	1857.43	55.81	1	0	6	87	7.12124e+10	13.9798
UniProtKB:P04908	Histone H2A type 1-B/E OS=Homo sapiens GN=HIST1H2AB PE=1 SV=2	1852.26	55.38	1	0	6	86	7.12124e+10	14.127
UniProtKB:Q93077	Histone H2A type 1-C OS=Homo sapiens GN=HIST1H2AC PE=1 SV=3	1852.26	55.38	1	0	6	86	7.12124e+10	14.0969
UniProtKB:P20671	Histone H2A type 1-D OS=Homo sapiens GN=HIST1H2AD PE=1 SV=2	1852.26	55.38	1	0	6	86	7.12124e+10	14.0989
UniProtKB:Q96KK5	Histone H2A type 1-H OS=Homo sapiens GN=HIST1H2AH PE=1 SV=3	1852.26	56.25	1	0	6	86	7.12124e+10	13.8978
UniProtKB:Q99878	Histone H2A type 1-J OS=Homo sapiens GN=HIST1H2AJ PE=1 SV=3	1852.26	56.25	1	0	6	86	7.12124e+10	13.9278
UniProtKB:P0C0S8	Histone H2A type 1 OS=Homo sapiens GN=HIST1H2AG PE=1 SV=2	1852.26	55.38	1	0	6	86	7.12124e+10	14.0829
UniProtKB:Q7L7L0	Histone H2A type 3 OS=Homo sapiens GN=HIST3H2A PE=1 SV=3	1852.26	55.38	1	0	6	86	7.12124e+10	14.1129
UniProtKB:Q9BTM1	Histone H2A.J OS=Homo sapiens GN=H2AFJ PE=1 SV=1	1852.26	55.81	1	0	6	86	7.12124e+10	14.0109
UniProtKB:P07355	Annexin A2 OS=Homo sapiens GN=ANXA2 PE=1 SV=2	1845.3	58.7	1	5	18	68	1.0384e+09	38.5798
UniProtKB:Q14566	DNA replication licensing factor MCM6 OS=Homo sapiens GN=MCM6 PE=1 SV=1	1843.49	39.22	1	29	29	73	8.552e+08	92.8312
UniProtKB:P06744	Glucose-6-phosphate isomerase OS=Homo sapiens GN=GPI PE=1 SV=4	1836.56	52.51	1	17	21	81	2.05562e+09	63.1072
UniProtKB:P52597	Heterogeneous nuclear ribonucleoprotein F OS=Homo sapiens GN=HNRNPF PE=1 SV=3	1830.37	38.8	1	10	12	66	3.77429e+09	45.6429
UniProtKB:P22392	Nucleoside diphosphate kinase B OS=Homo sapiens GN=NME2 PE=1 SV=1	1806.56	65.79	1	1	8	73	8.27283e+09	17.2869
UniProtKB:P09874	Poly [ADP-ribose] polymerase 1 OS=Homo sapiens GN=PARP1 PE=1 SV=4	1781.56	40.24	1	34	34	79	9.36472e+08	113.012
UniProtKB:P05387	60S acidic ribosomal protein P2 OS=Homo sapiens GN=RPLP2 PE=1 SV=1	1769.3	73.91	1	7	7	45	1.30028e+10	11.6578
UniProtKB:P36578	60S ribosomal protein L4 OS=Homo sapiens GN=RPL4 PE=1 SV=5	1767.05	44.73	1	24	24	86	4.68085e+09	47.6674
UniProtKB:Q13200	26S proteasome non-ATPase regulatory subunit 2 OS=Homo sapiens GN=PSMD2 PE=1 SV=3	1763.47	40.31	1	29	29	73	8.90703e+08	100.136
UniProtKB:O75533	Splicing factor 3B subunit 1 OS=Homo sapiens GN=SF3B1 PE=1 SV=3	1749.48	36.89	1	37	37	78	6.54311e+08	145.738
UniProtKB:P0CG38	POTE ankyrin domain family member I OS=Homo sapiens GN=POTEI PE=3 SV=1	1736.11	4.28	1	0	5	111	2.57922e+10	121.205
UniProtKB:P17980	26S protease regulatory subunit 6A OS=Homo sapiens GN=PSMC3 PE=1 SV=3	1734.49	59.23	1	19	19	65	1.46828e+09	49.1725
UniProtKB:P30086	Phosphatidylethanolamine-binding protein 1 OS=Homo sapiens GN=PEBP1 PE=1 SV=3	1729.32	75.4	1	11	11	45	2.2422e+09	21.0437
UniProtKB:Q14240	Eukaryotic initiation factor 4A-II OS=Homo sapiens GN=EIF4A2 PE=1 SV=2	1723.91	40.05	1	5	14	64	5.63794e+09	46.3728
UniProtKB:P0CG39	POTE ankyrin domain family member J OS=Homo sapiens GN=POTEJ PE=3 SV=1	1710.73	3.37	1	0	4	100	1.9584e+10	117.315
UniProtKB:P22234	Multifunctional protein ADE2 OS=Homo sapiens GN=PAICS PE=1 SV=3	1705.4	45.88	1	17	17	55	2.03117e+09	47.0491
UniProtKB:P02545	Prelamin-A/C OS=Homo sapiens GN=LMNA PE=1 SV=1	1701.66	46.54	1	27	28	69	7.38958e+08	74.0947
UniProtKB:Q9NZI8	Insulin-like growth factor 2 mRNA-binding protein 1 OS=Homo sapiens GN=IGF2BP1 PE=1 SV=2	1700	39.34	1	18	19	51	1346567005	63.4412
UniProtKB:P31939	Bifunctional purine biosynthesis protein PURH OS=Homo sapiens GN=ATIC PE=1 SV=3	1697.51	69.09	1	31	31	72	1.67072e+09	64.5753
UniProtKB:Q02790	Peptidyl-prolyl cis-trans isomerase FKBP4 OS=Homo sapiens GN=FKBP4 PE=1 SV=3	1697.31	65.14	1	25	25	71	2.42024e+09	51.7721
UniProtKB:P06454	Prothymosin alpha OS=Homo sapiens GN=PTMA PE=1 SV=2	1695.47	38.74	1	8	8	57	7.01507e+09	12.196
UniProtKB:Q14697	Neutral alpha-glucosidase AB OS=Homo sapiens GN=GANAB PE=1 SV=3	1694.6	39.51	1	29	29	82	7.76491e+08	106.807
UniProtKB:Q14980	Nuclear mitotic apparatus protein 1 OS=Homo sapiens GN=NUMA1 PE=1 SV=2	1685.06	23.64	1	34	34	65	3.56243e+08	238.115
UniProtKB:Q9Y2T7	Y-box-binding protein 2 OS=Homo sapiens GN=YBX2 PE=1 SV=2	1678.19	10.99	1	0	4	30	8.91487e+08	38.4948
UniProtKB:P62701	40S ribosomal protein S4, X isoform OS=Homo sapiens GN=RPS4X PE=1 SV=2	1673.39	67.3	1	11	20	92	2.58767e+09	29.5791
UniProtKB:P12004	Proliferating cell nuclear antigen OS=Homo sapiens GN=PCNA PE=1 SV=1	1668.13	68.2	1	16	16	58	2.67301e+09	28.7503
UniProtKB:P62140	Serine/threonine-protein phosphatase PP1-beta catalytic subunit OS=Homo sapiens GN=PPP1CB PE=1 SV=3	1668.12	53.21	1	5	16	53	8.8625e+08	37.1626
UniProtKB:P09960	Leukotriene A-4 hydrolase OS=Homo sapiens GN=LTA4H PE=1 SV=2	1658.79	53.19	1	25	25	63	1.15348e+09	69.2412
UniProtKB:P62136	Serine/threonine-protein phosphatase PP1-alpha catalytic subunit OS=Homo sapiens GN=PPP1CA PE=1 SV=1	1650.53	60.91	1	3	17	59	8.8625e+08	37.4878
UniProtKB:Q9Y4L1	Hypoxia up-regulated protein 1 OS=Homo sapiens GN=HYOU1 PE=1 SV=1	1649.4	30.63	1	21	22	52	328240114	111.266
UniProtKB:P30154	Serine/threonine-protein phosphatase 2A 65 kDa regulatory subunit A beta isoform OS=Homo sapiens GN=PPP2R1B PE=1 SV=3	1641.12	24.46	1	5	10	38	1.39657e+09	66.1715
UniProtKB:P36873	Serine/threonine-protein phosphatase PP1-gamma catalytic subunit OS=Homo sapiens GN=PPP1CC PE=1 SV=1	1633.17	58.82	1	2	16	57	8.8625e+08	36.9597
UniProtKB:P25705	ATP synthase subunit alpha, mitochondrial OS=Homo sapiens GN=ATP5A1 PE=1 SV=1	1625.74	37.79	1	17	17	52	1323353610	59.7136
UniProtKB:Q15185	Prostaglandin E synthase 3 OS=Homo sapiens GN=PTGES3 PE=1 SV=1	1622.72	60.62	1	10	10	52	3.53815e+09	18.6854
UniProtKB:Q9Y224	UPF0568 protein C14orf166 OS=Homo sapiens GN=C14orf166 PE=1 SV=1	1619.98	56.97	1	12	12	49	1.04057e+09	28.0507
UniProtKB:P17844	Probable ATP-dependent RNA helicase DDX5 OS=Homo sapiens GN=DDX5 PE=1 SV=1	1612.11	46.25	1	20	28	89	1.94461e+09	69.1047
UniProtKB:P09211	Glutathione S-transferase P OS=Homo sapiens GN=GSTP1 PE=1 SV=2	1605.56	60.95	1	9	9	39	5.7518e+09	23.341
UniProtKB:O95757	Heat shock 70 kDa protein 4L OS=Homo sapiens GN=HSPA4L PE=1 SV=3	1604.4	45.29	1	24	27	60	1.62621e+09	94.4525
UniProtKB:Q9NYF8	Bcl-2-associated transcription factor 1 OS=Homo sapiens GN=BCLAF1 PE=1 SV=2	1604.22	24.89	1	19	20	67	6.16353e+08	106.059
UniProtKB:Q92499	ATP-dependent RNA helicase DDX1 OS=Homo sapiens GN=DDX1 PE=1 SV=2	1599.53	46.22	1	29	29	74	8.56879e+08	82.3798
UniProtKB:Q02952	A-kinase anchor protein 12 OS=Homo sapiens GN=AKAP12 PE=1 SV=3	1596.34	29.69	1	27	27	52	2.58431e+08	191.368
UniProtKB:P23526	Adenosylhomocysteinase OS=Homo sapiens GN=AHCY PE=1 SV=4	1596.12	41.44	1	15	15	53	2.10992e+09	47.6852
UniProtKB:P55795	Heterogeneous nuclear ribonucleoprotein H2 OS=Homo sapiens GN=HNRNPH2 PE=1 SV=1	1595.86	40.53	1	7	12	66	5.68059e+09	49.2323
UniProtKB:P42704	Leucine-rich PPR motif-containing protein, mitochondrial OS=Homo sapiens GN=LRPPRC PE=1 SV=3	1594.15	30.92	1	34	34	71	2.95648e+08	157.805
UniProtKB:P55209	Nucleosome assembly protein 1-like 1 OS=Homo sapiens GN=NAP1L1 PE=1 SV=1	1587.38	44.5	1	8	9	43	4.24269e+09	45.3459
UniProtKB:P11586	C-1-tetrahydrofolate synthase, cytoplasmic OS=Homo sapiens GN=MTHFD1 PE=1 SV=3	1586.18	52.3	1	37	37	82	3.34928e+09	101.495
UniProtKB:Q58FG1	Putative heat shock protein HSP 90-alpha A4 OS=Homo sapiens GN=HSP90AA4P PE=5 SV=1	1580.39	7.42	1	0	3	75	4.68722e+09	47.6821
UniProtKB:O14979	Heterogeneous nuclear ribonucleoprotein D-like OS=Homo sapiens GN=HNRPDL PE=1 SV=3	1579.15	21.43	1	9	11	56	4.48355e+09	46.4091
UniProtKB:P24534	Elongation factor 1-beta OS=Homo sapiens GN=EEF1B2 PE=1 SV=3	1574.09	60.89	1	7	9	50	4.87447e+09	24.7483
UniProtKB:Q9BQG0	Myb-binding protein 1A OS=Homo sapiens GN=MYBBP1A PE=1 SV=2	1570.76	25.83	1	27	27	56	4.73539e+08	148.762
UniProtKB:P08708	40S ribosomal protein S17 OS=Homo sapiens GN=RPS17 PE=1 SV=2	1558.08	49.63	1	5	5	38	1.99181e+09	15.5404
UniProtKB:O60763	General vesicular transport factor p115 OS=Homo sapiens GN=USO1 PE=1 SV=2	1555.37	35.45	1	24	25	50	2.89301e+08	107.828
UniProtKB:Q14152	Eukaryotic translation initiation factor 3 subunit A OS=Homo sapiens GN=EIF3A PE=1 SV=1	1551.19	33.29	1	44	44	91	8.34444e+08	166.468
UniProtKB:Q9Y5B9	FACT complex subunit SPT16 OS=Homo sapiens GN=SUPT16H PE=1 SV=1	1547.86	32.76	1	33	34	75	1.07589e+09	119.838
UniProtKB:Q08945	FACT complex subunit SSRP1 OS=Homo sapiens GN=SSRP1 PE=1 SV=1	1547.04	42.31	1	24	24	67	1.25014e+09	81.0244
UniProtKB:P46782	40S ribosomal protein S5 OS=Homo sapiens GN=RPS5 PE=1 SV=4	1544.11	34.8	1	6	6	33	3.34394e+09	22.8621
UniProtKB:P54652	Heat shock-related 70 kDa protein 2 OS=Homo sapiens GN=HSPA2 PE=1 SV=1	1537.7	18.47	1	1	11	74	2.17054e+10	69.9779
UniProtKB:P55884	Eukaryotic translation initiation factor 3 subunit B OS=Homo sapiens GN=EIF3B PE=1 SV=3	1536.86	47.91	1	29	29	65	9.10262e+08	92.4238
UniProtKB:O14818	Proteasome subunit alpha type-7 OS=Homo sapiens GN=PSMA7 PE=1 SV=1	1533.46	57.66	1	6	11	40	1.39642e+09	27.8696
UniProtKB:P49736	DNA replication licensing factor MCM2 OS=Homo sapiens GN=MCM2 PE=1 SV=4	1518.63	43.03	1	28	28	66	1.04805e+09	101.832
UniProtKB:P05023	Sodium/potassium-transporting ATPase subunit alpha-1 OS=Homo sapiens GN=ATP1A1 PE=1 SV=1	1514.04	29.91	1	13	23	51	755727715	112.824
UniProtKB:Q8TEX9	Importin-4 OS=Homo sapiens GN=IPO4 PE=1 SV=2	1513.81	32.56	1	24	24	53	581240250	118.64
UniProtKB:P29692	Elongation factor 1-delta OS=Homo sapiens GN=EEF1D PE=1 SV=5	1513.5	72.95	1	13	15	49	4.21435e+09	31.1028
UniProtKB:O00571	ATP-dependent RNA helicase DDX3X OS=Homo sapiens GN=DDX3X PE=1 SV=3	1512.21	46.98	1	8	26	67	1.14446e+09	73.198
UniProtKB:Q99460	26S proteasome non-ATPase regulatory subunit 1 OS=Homo sapiens GN=PSMD1 PE=1 SV=2	1505.03	35.89	1	23	23	50	1.18361e+09	105.769
UniProtKB:O76021	Ribosomal L1 domain-containing protein 1 OS=Homo sapiens GN=RSL1D1 PE=1 SV=3	1504.52	43.88	1	18	18	59	702553335	54.9389
UniProtKB:P62987	Ubiquitin-60S ribosomal protein L40 OS=Homo sapiens GN=UBA52 PE=1 SV=2	1493.63	38.28	1	0	5	98	2.42822e+10	14.719
UniProtKB:P0CG47	Polyubiquitin-B OS=Homo sapiens GN=UBB PE=1 SV=1	1493.63	64.19	1	0	5	98	2.42822e+10	25.7458
UniProtKB:P0CG48	Polyubiquitin-C OS=Homo sapiens GN=UBC PE=1 SV=2	1493.63	63.07	1	0	5	98	2.42822e+10	76.9815
UniProtKB:O43143	Putative pre-mRNA-splicing factor ATP-dependent RNA helicase DHX15 OS=Homo sapiens GN=DHX15 PE=1 SV=2	1491.56	35.6	1	22	22	56	438609395	90.8752
UniProtKB:P06737	Glycogen phosphorylase, liver form OS=Homo sapiens GN=PYGL PE=1 SV=4	1480.46	37.43	1	26	29	64	4.68822e+08	97.087
UniProtKB:P15924	Desmoplakin OS=Homo sapiens GN=DSP PE=1 SV=3	1472.34	14.21	1	31	31	53	2.09421e+08	331.569
UniProtKB:Q7L2H7	Eukaryotic translation initiation factor 3 subunit M OS=Homo sapiens GN=EIF3M PE=1 SV=1	1471.36	37.97	1	12	12	48	1015033614	42.4758
UniProtKB:P26639	Threonyl-tRNA synthetase, cytoplasmic OS=Homo sapiens GN=TARS PE=1 SV=3	1468.44	48.41	1	32	33	81	7.4278e+08	83.3819
UniProtKB:P17066	Heat shock 70 kDa protein 6 OS=Homo sapiens GN=HSPA6 PE=1 SV=2	1464.9	13.69	1	0	9	64	1.98677e+10	70.9842
UniProtKB:P20290	Transcription factor BTF3 OS=Homo sapiens GN=BTF3 PE=1 SV=1	1459.6	63.11	1	8	9	39	1.75278e+09	22.1544
UniProtKB:P61981	14-3-3 protein gamma OS=Homo sapiens GN=YWHAG PE=1 SV=2	1458.65	60.73	1	7	12	80	1.62052e+10	28.2849
UniProtKB:P35749	Myosin-11 OS=Homo sapiens GN=MYH11 PE=1 SV=3	1451.6	7.86	1	0	14	45	1119601644	227.199
UniProtKB:P07814	Bifunctional aminoacyl-tRNA synthetase OS=Homo sapiens GN=EPRS PE=1 SV=5	1449.79	45.37	1	46	46	74	547815111	170.483
UniProtKB:Q13185	Chromobox protein homolog 3 OS=Homo sapiens GN=CBX3 PE=1 SV=4	1445.13	64.48	1	8	10	45	1.80809e+09	20.7984
UniProtKB:Q04917	14-3-3 protein eta OS=Homo sapiens GN=YWHAH PE=1 SV=4	1444.68	60.57	1	13	16	78	1.62052e+10	28.201
UniProtKB:P51659	Peroxisomal multifunctional enzyme type 2 OS=Homo sapiens GN=HSD17B4 PE=1 SV=3	1436.01	36.55	1	17	17	36	3.96753e+08	79.6363
UniProtKB:Q9UHX1	Poly(U)-binding-splicing factor PUF60 OS=Homo sapiens GN=PUF60 PE=1 SV=1	1435.91	45.08	1	20	20	55	8.99169e+08	59.8376
UniProtKB:P33993	DNA replication licensing factor MCM7 OS=Homo sapiens GN=MCM7 PE=1 SV=4	1431.92	44.65	1	28	28	69	1187114843	81.2566
UniProtKB:P38919	Eukaryotic initiation factor 4A-III OS=Homo sapiens GN=EIF4A3 PE=1 SV=4	1427.47	53.04	1	18	20	60	1.53163e+09	46.8412
UniProtKB:P53621	Coatomer subunit alpha OS=Homo sapiens GN=COPA PE=1 SV=2	1423.73	34.23	1	33	33	60	6.81164e+08	138.258
UniProtKB:P61289	Proteasome activator complex subunit 3 OS=Homo sapiens GN=PSME3 PE=1 SV=1	1419.98	44.49	1	13	13	44	1.22378e+09	29.4876
UniProtKB:Q96QK1	Vacuolar protein sorting-associated protein 35 OS=Homo sapiens GN=VPS35 PE=1 SV=2	1417.47	37.44	1	25	25	53	6.96289e+08	91.6489
UniProtKB:P46060	Ran GTPase-activating protein 1 OS=Homo sapiens GN=RANGAP1 PE=1 SV=1	1413.76	53.15	1	25	25	66	9.48899e+08	63.5023
UniProtKB:Q58FF8	Putative heat shock protein HSP 90-beta 2 OS=Homo sapiens GN=HSP90AB2P PE=1 SV=2	1411.18	20.47	1	0	11	53	1.57466e+10	44.3211
UniProtKB:O00429	Dynamin-1-like protein OS=Homo sapiens GN=DNM1L PE=1 SV=2	1407.09	38.04	1	19	19	40	4.3674e+08	81.8261
UniProtKB:O60361	Putative nucleoside diphosphate kinase OS=Homo sapiens GN=NME2P1 PE=5 SV=1	1394.95	54.74	1	1	6	52	7.14453e+09	15.519
UniProtKB:O43390	Heterogeneous nuclear ribonucleoprotein R OS=Homo sapiens GN=HNRNPR PE=1 SV=1	1390.29	41.23	1	16	22	63	1.46055e+09	70.8993
UniProtKB:Q9GZV4	Eukaryotic translation initiation factor 5A-2 OS=Homo sapiens GN=EIF5A2 PE=1 SV=3	1384.13	29.41	1	0	5	56	5.13372e+09	16.7822
UniProtKB:P37802	Transgelin-2 OS=Homo sapiens GN=TAGLN2 PE=1 SV=3	1383.15	81.41	1	13	14	52	2.90855e+09	22.3772
UniProtKB:Q99729	Heterogeneous nuclear ribonucleoprotein A/B OS=Homo sapiens GN=HNRNPAB PE=1 SV=2	1375.69	26.81	1	9	10	74	3.09214e+09	36.2024
UniProtKB:P29966	Myristoylated alanine-rich C-kinase substrate OS=Homo sapiens GN=MARCKS PE=1 SV=4	1373.88	44.58	1	9	9	34	1.23161e+09	31.5359
UniProtKB:P27797	Calreticulin OS=Homo sapiens GN=CALR PE=1 SV=1	1373.81	50.84	1	13	13	38	2.51362e+09	48.1118
UniProtKB:O15067	Phosphoribosylformylglycinamidine synthase OS=Homo sapiens GN=PFAS PE=1 SV=3	1372.45	32.21	1	25	25	48	7.16319e+08	144.633
UniProtKB:P18669	Phosphoglycerate mutase 1 OS=Homo sapiens GN=PGAM1 PE=1 SV=2	1369.1	68.11	1	6	12	60	4.91559e+09	28.7858
UniProtKB:Q10567	AP-1 complex subunit beta-1 OS=Homo sapiens GN=AP1B1 PE=1 SV=2	1368.68	34.56	1	12	26	53	1.17278e+09	104.57
UniProtKB:Q7KZF4	Staphylococcal nuclease domain-containing protein 1 OS=Homo sapiens GN=SND1 PE=1 SV=1	1367.34	51.32	1	35	35	70	5.63085e+08	101.934
UniProtKB:P62241	40S ribosomal protein S8 OS=Homo sapiens GN=RPS8 PE=1 SV=2	1357.23	59.13	1	13	13	53	4.44946e+09	24.1902
UniProtKB:P46940	Ras GTPase-activating-like protein IQGAP1 OS=Homo sapiens GN=IQGAP1 PE=1 SV=1	1352.71	24.08	1	25	25	42	2.61394e+08	189.134
UniProtKB:Q9Y678	Coatomer subunit gamma OS=Homo sapiens GN=COPG PE=1 SV=1	1340.34	35.01	1	18	21	47	7.9246e+08	97.6555
UniProtKB:A6NMY6	Putative annexin A2-like protein OS=Homo sapiens GN=ANXA2P2 PE=5 SV=2	1339.41	44.25	1	0	13	53	1.0384e+09	38.6348
UniProtKB:Q9HAV4	Exportin-5 OS=Homo sapiens GN=XPO5 PE=1 SV=1	1333.02	27.74	1	25	25	48	5.49559e+08	136.222
UniProtKB:O00148	ATP-dependent RNA helicase DDX39 OS=Homo sapiens GN=DDX39 PE=1 SV=2	1332.29	43.79	1	6	16	66	2803053218	49.098
UniProtKB:P15880	40S ribosomal protein S2 OS=Homo sapiens GN=RPS2 PE=1 SV=2	1323.98	50.17	1	14	14	54	3.13331e+09	31.3046
UniProtKB:P41252	Isoleucyl-tRNA synthetase, cytoplasmic OS=Homo sapiens GN=IARS PE=1 SV=2	1316.22	33.2	1	30	30	60	3.91178e+08	144.406
UniProtKB:CON_P02769	(Bos taurus) Bovine serum albumin precursor	1316.06	46.79	1	22	27	65	1.01641e+09	69.2484
UniProtKB:P60660	Myosin light polypeptide 6 OS=Homo sapiens GN=MYL6 PE=1 SV=2	1315.52	65.56	1	7	9	46	1.88952e+09	16.9191
UniProtKB:P52209	6-phosphogluconate dehydrogenase, decarboxylating OS=Homo sapiens GN=PGD PE=1 SV=3	1312.16	31.06	1	13	13	45	1677036491	53.106
UniProtKB:P26368	Splicing factor U2AF 65 kDa subunit OS=Homo sapiens GN=U2AF2 PE=1 SV=4	1303.79	43.79	1	12	12	45	2.84953e+09	53.4672
UniProtKB:P78527	DNA-dependent protein kinase catalytic subunit OS=Homo sapiens GN=PRKDC PE=1 SV=3	1300.19	10.71	1	31	31	51	1.51057e+08	468.788
UniProtKB:O75534	Cold shock domain-containing protein E1 OS=Homo sapiens GN=CSDE1 PE=1 SV=2	1299.71	38.22	1	28	28	65	5.54257e+08	88.8289
UniProtKB:Q07955	Serine/arginine-rich splicing factor 1 OS=Homo sapiens GN=SRSF1 PE=1 SV=2	1292.97	46.37	1	13	14	71	1.91318e+09	27.7278
UniProtKB:Q04637	Eukaryotic translation initiation factor 4 gamma 1 OS=Homo sapiens GN=EIF4G1 PE=1 SV=4	1292.95	17.82	1	21	24	59	5.45059e+08	175.382
UniProtKB:P63220	40S ribosomal protein S21 OS=Homo sapiens GN=RPS21 PE=1 SV=1	1286.61	60.24	1	6	6	32	2.1853e+09	9.10557
UniProtKB:Q9Y3F4	Serine-threonine kinase receptor-associated protein OS=Homo sapiens GN=STRAP PE=1 SV=1	1278.84	67.43	1	18	18	50	1.16654e+09	38.414
UniProtKB:Q9Y2X3	Nucleolar protein 58 OS=Homo sapiens GN=NOP58 PE=1 SV=1	1274.56	44.8	1	18	18	39	2.95099e+08	59.5405
UniProtKB:Q99613	Eukaryotic translation initiation factor 3 subunit C OS=Homo sapiens GN=EIF3C PE=1 SV=1	1269.22	24.32	1	19	19	50	7.14992e+08	105.278
UniProtKB:P08133	Annexin A6 OS=Homo sapiens GN=ANXA6 PE=1 SV=3	1268.01	41.75	1	26	26	67	961082995	75.8256
UniProtKB:P30050	60S ribosomal protein L12 OS=Homo sapiens GN=RPL12 PE=1 SV=1	1263.8	58.79	1	7	7	55	3.41458e+09	17.8075
UniProtKB:Q9HB71	Calcyclin-binding protein OS=Homo sapiens GN=CACYBP PE=1 SV=2	1262.5	68.86	1	16	16	51	1.68806e+09	26.1936
UniProtKB:P28066	Proteasome subunit alpha type-5 OS=Homo sapiens GN=PSMA5 PE=1 SV=3	1260.63	55.19	1	11	11	45	1.76996e+09	26.3942
UniProtKB:P60228	Eukaryotic translation initiation factor 3 subunit E OS=Homo sapiens GN=EIF3E PE=1 SV=1	1258.29	47.87	1	18	18	50	6.42073e+08	52.1874
UniProtKB:P18124	60S ribosomal protein L7 OS=Homo sapiens GN=RPL7 PE=1 SV=1	1257.81	43.55	1	15	15	60	3.81189e+09	29.2072
UniProtKB:A6NKZ8	Putative tubulin beta chain-like protein ENSP00000290377 OS=Homo sapiens PE=5 SV=2	1257.32	11.56	1	0	5	73	8.08182e+09	41.7481
UniProtKB:P25398	40S ribosomal protein S12 OS=Homo sapiens GN=RPS12 PE=1 SV=3	1255.85	71.97	1	10	10	55	3.56506e+09	14.5055
UniProtKB:Q14157	Ubiquitin-associated protein 2-like OS=Homo sapiens GN=UBAP2L PE=1 SV=2	1250.75	25.67	1	17	17	38	6.22389e+08	114.465
UniProtKB:Q9Y230	RuvB-like 2 OS=Homo sapiens GN=RUVBL2 PE=1 SV=3	1249.34	46.87	1	19	19	42	1.03232e+09	51.1246
UniProtKB:Q15424	Scaffold attachment factor B1 OS=Homo sapiens GN=SAFB PE=1 SV=4	1248.53	26.89	1	13	21	43	7.27974e+08	102.58
UniProtKB:P05198	Eukaryotic translation initiation factor 2 subunit 1 OS=Homo sapiens GN=EIF2S1 PE=1 SV=3	1242.99	40.63	1	12	12	32	657915845	36.0894
UniProtKB:P30084	Enoyl-CoA hydratase, mitochondrial OS=Homo sapiens GN=ECHS1 PE=1 SV=4	1241.89	38.28	1	8	8	38	3.4923e+08	31.3671
UniProtKB:O75694	Nuclear pore complex protein Nup155 OS=Homo sapiens GN=NUP155 PE=1 SV=1	1240.75	18.84	1	20	20	44	3.93834e+08	155.1
UniProtKB:P41250	Glycyl-tRNA synthetase OS=Homo sapiens GN=GARS PE=1 SV=3	1240.66	31.66	1	18	18	51	6.45438e+08	83.1126
UniProtKB:P05388	60S acidic ribosomal protein P0 OS=Homo sapiens GN=RPLP0 PE=1 SV=1	1237.62	52.05	1	4	13	64	3.68728e+09	34.2518
UniProtKB:P63010	AP-2 complex subunit beta OS=Homo sapiens GN=AP2B1 PE=1 SV=1	1233.89	29.56	1	10	24	50	1.081e+09	104.486
UniProtKB:P15531	Nucleoside diphosphate kinase A OS=Homo sapiens GN=NME1 PE=1 SV=1	1232.01	65.13	1	4	8	67	8.27283e+09	17.1377
UniProtKB:Q04760	Lactoylglutathione lyase OS=Homo sapiens GN=GLO1 PE=1 SV=4	1224.83	65.22	1	10	10	49	3.00146e+09	20.7642
UniProtKB:P35232	Prohibitin OS=Homo sapiens GN=PHB PE=1 SV=1	1220.05	62.5	1	15	15	51	1.30563e+09	29.7859
UniProtKB:P31689	DnaJ homolog subfamily A member 1 OS=Homo sapiens GN=DNAJA1 PE=1 SV=2	1216.77	43.83	1	12	12	48	1549313860	44.8395
UniProtKB:Q14103	Heterogeneous nuclear ribonucleoprotein D0 OS=Homo sapiens GN=HNRNPD PE=1 SV=1	1215.12	31.83	1	12	13	48	4.16108e+09	38.4103
UniProtKB:Q14568	Putative heat shock protein HSP 90-alpha A2 OS=Homo sapiens GN=HSP90AA2 PE=1 SV=2	1214.26	21.57	1	0	6	76	1.63981e+10	39.3404
UniProtKB:Q13561	Dynactin subunit 2 OS=Homo sapiens GN=DCTN2 PE=1 SV=4	1213.31	54.11	1	15	15	39	7.16884e+08	44.2039
UniProtKB:Q92900	Regulator of nonsense transcripts 1 OS=Homo sapiens GN=UPF1 PE=1 SV=2	1207.37	31.98	1	25	25	50	4.67908e+08	124.267
UniProtKB:P61204	ADP-ribosylation factor 3 OS=Homo sapiens GN=ARF3 PE=1 SV=2	1205.35	67.4	1	0	11	52	1.91413e+09	20.5877
UniProtKB:P84077	ADP-ribosylation factor 1 OS=Homo sapiens GN=ARF1 PE=1 SV=2	1205.35	72.38	1	1	12	53	1.91413e+09	20.6837
UniProtKB:Q58FG0	Putative heat shock protein HSP 90-alpha A5 OS=Homo sapiens GN=HSP90AA5P PE=1 SV=1	1205.32	14.07	1	0	6	64	8.61315e+09	38.7138
UniProtKB:P23396	40S ribosomal protein S3 OS=Homo sapiens GN=RPS3 PE=1 SV=2	1200.81	79.01	1	20	20	80	2590179822	26.6714
UniProtKB:P62424	60S ribosomal protein L7a OS=Homo sapiens GN=RPL7A PE=1 SV=2	1198.61	34.96	1	13	13	49	3.78219e+09	29.977
UniProtKB:P53675	Clathrin heavy chain 2 OS=Homo sapiens GN=CLTCL1 PE=1 SV=2	1196.95	9.51	1	0	16	61	2.08106e+09	186.91
UniProtKB:P49915	GMP synthase [glutamine-hydrolyzing] OS=Homo sapiens GN=GMPS PE=1 SV=1	1195.14	45.45	1	25	25	54	4.82131e+08	76.667
UniProtKB:P62195	26S protease regulatory subunit 8 OS=Homo sapiens GN=PSMC5 PE=1 SV=1	1193.52	50	1	16	17	40	1.22288e+09	45.5971
UniProtKB:Q9Y262	Eukaryotic translation initiation factor 3 subunit L OS=Homo sapiens GN=EIF3L PE=1 SV=1	1191.38	40.43	1	19	19	48	5.34848e+08	66.6844
UniProtKB:Q9P2J5	Leucyl-tRNA synthetase, cytoplasmic OS=Homo sapiens GN=LARS PE=1 SV=2	1190.84	22.7	1	21	21	38	2.57153e+08	134.379
UniProtKB:Q15021	Condensin complex subunit 1 OS=Homo sapiens GN=NCAPD2 PE=1 SV=3	1185.61	23.41	1	22	22	40	2.44571e+08	157.082
UniProtKB:Q8N1F7	Nuclear pore complex protein Nup93 OS=Homo sapiens GN=NUP93 PE=1 SV=2	1183.36	35.65	1	25	25	50	1.04231e+09	93.4296
UniProtKB:O95218	Zinc finger Ran-binding domain-containing protein 2 OS=Homo sapiens GN=ZRANB2 PE=1 SV=2	1182.99	36.36	1	10	10	30	4.26306e+08	37.382
UniProtKB:Q4VCS5	Angiomotin OS=Homo sapiens GN=AMOT PE=1 SV=1	1176.9	27.86	1	20	21	42	4.79867e+08	118.013
UniProtKB:Q92973	Transportin-1 OS=Homo sapiens GN=TNPO1 PE=1 SV=2	1176.64	27.73	1	17	19	44	1.23726e+09	102.289
UniProtKB:P55786	Puromycin-sensitive aminopeptidase OS=Homo sapiens GN=NPEPPS PE=1 SV=2	1173.57	32.21	1	14	24	54	1.0068e+09	103.211
UniProtKB:O43592	Exportin-T OS=Homo sapiens GN=XPOT PE=1 SV=2	1172.49	30.25	1	21	21	44	2.79603e+08	109.893
UniProtKB:Q96AE4	Far upstream element-binding protein 1 OS=Homo sapiens GN=FUBP1 PE=1 SV=3	1167.99	41.3	1	19	21	57	1.42284e+09	67.5185
UniProtKB:P16104	Histone H2A.x OS=Homo sapiens GN=H2AFX PE=1 SV=2	1167.48	52.45	1	0	5	62	3.11811e+10	15.1354
UniProtKB:P27635	60S ribosomal protein L10 OS=Homo sapiens GN=RPL10 PE=1 SV=4	1163.2	51.4	1	7	12	49	6.00249e+09	24.5879
UniProtKB:Q1KMD3	Heterogeneous nuclear ribonucleoprotein U-like protein 2 OS=Homo sapiens GN=HNRNPUL2 PE=1 SV=1	1162.03	24.63	1	14	14	38	3.83195e+08	85.0522
UniProtKB:P41567	Eukaryotic translation initiation factor 1 OS=Homo sapiens GN=EIF1 PE=1 SV=1	1161.11	80.53	1	4	9	31	9.85091e+08	12.7246
UniProtKB:Q8WUM4	Programmed cell death 6-interacting protein OS=Homo sapiens GN=PDCD6IP PE=1 SV=1	1160.77	32.03	1	22	22	50	6.63558e+08	95.9631
UniProtKB:P23381	Tryptophanyl-tRNA synthetase, cytoplasmic OS=Homo sapiens GN=WARS PE=1 SV=2	1159.8	44.16	1	12	12	35	6.93422e+08	53.1316
UniProtKB:Q99733	Nucleosome assembly protein 1-like 4 OS=Homo sapiens GN=NAP1L4 PE=1 SV=1	1155.76	53.6	1	11	12	34	1.20252e+09	42.7969
UniProtKB:P62158	Calmodulin OS=Homo sapiens GN=CALM1 PE=1 SV=2	1149.1	51.68	1	7	9	42	4.37954e+09	16.8268
UniProtKB:O60812	Heterogeneous nuclear ribonucleoprotein C-like 1 OS=Homo sapiens GN=HNRNPCL1 PE=1 SV=1	1146.48	15.02	1	0	7	45	6.96282e+09	32.1227
UniProtKB:P62316	Small nuclear ribonucleoprotein Sm D2 OS=Homo sapiens GN=SNRPD2 PE=1 SV=1	1145.96	67.8	1	11	11	47	1.95579e+09	13.5182
UniProtKB:Q9UHD9	Ubiquilin-2 OS=Homo sapiens GN=UBQLN2 PE=1 SV=2	1125.35	28.37	1	7	12	30	5.85562e+08	65.6546
UniProtKB:P42285	Superkiller viralicidic activity 2-like 2 OS=Homo sapiens GN=SKIV2L2 PE=1 SV=3	1118.8	23.22	1	17	17	46	3.80485e+08	117.729
UniProtKB:O60664	Perilipin-3 OS=Homo sapiens GN=PLIN3 PE=1 SV=2	1116.52	50.23	1	12	12	22	4.77835e+08	47.0179
UniProtKB:Q9Y3I0	UPF0027 protein C22orf28 OS=Homo sapiens GN=C22orf28 PE=1 SV=1	1115.96	40.4	1	16	16	55	1.75122e+09	55.1749
UniProtKB:Q13283	Ras GTPase-activating protein-binding protein 1 OS=Homo sapiens GN=G3BP1 PE=1 SV=1	1114.51	42.06	1	13	13	40	1.2503e+09	52.1321
UniProtKB:Q13765	Nascent polypeptide-associated complex subunit alpha OS=Homo sapiens GN=NACA PE=1 SV=1	1110.29	41.86	1	4	5	30	3.11894e+09	23.3697
UniProtKB:P99999	Cytochrome c OS=Homo sapiens GN=CYCS PE=1 SV=2	1105.42	61.9	1	5	8	29	1.11847e+09	11.7411
UniProtKB:Q8WUM0	Nuclear pore complex protein Nup133 OS=Homo sapiens GN=NUP133 PE=1 SV=2	1097.01	29.24	1	24	24	47	468176292	128.898
UniProtKB:Q13435	Splicing factor 3B subunit 2 OS=Homo sapiens GN=SF3B2 PE=1 SV=2	1096.99	34.3	1	24	24	55	7.53443e+08	100.165
UniProtKB:Q9UBB4	Ataxin-10 OS=Homo sapiens GN=ATXN10 PE=1 SV=1	1091.8	53.05	1	19	19	47	4.30485e+08	53.4548
UniProtKB:P61313	60S ribosomal protein L15 OS=Homo sapiens GN=RPL15 PE=1 SV=2	1081.01	34.31	1	8	8	51	2.37995e+09	24.1311
UniProtKB:Q09161	Nuclear cap-binding protein subunit 1 OS=Homo sapiens GN=NCBP1 PE=1 SV=1	1075.78	29.75	1	18	18	42	5.29801e+08	91.7805
UniProtKB:P31942	Heterogeneous nuclear ribonucleoprotein H3 OS=Homo sapiens GN=HNRNPH3 PE=1 SV=2	1074.73	49.42	1	11	12	38	1.34273e+09	36.9031
UniProtKB:Q7KZ85	Transcription elongation factor SPT6 OS=Homo sapiens GN=SUPT6H PE=1 SV=2	1068.08	17.56	1	20	20	31	1.3745e+08	198.949
UniProtKB:P27816	Microtubule-associated protein 4 OS=Homo sapiens GN=MAP4 PE=1 SV=3	1063.66	24.13	1	21	21	39	3.08619e+08	120.93
UniProtKB:Q15019	Septin-2 OS=Homo sapiens GN=SEPT2 PE=1 SV=1	1063.37	57.62	1	15	15	34	1.30879e+09	41.4613
UniProtKB:Q8TBC4	NEDD8-activating enzyme E1 catalytic subunit OS=Homo sapiens GN=UBA3 PE=1 SV=2	1062.2	34.56	1	9	9	23	2.59922e+08	51.8193
UniProtKB:P18754	Regulator of chromosome condensation OS=Homo sapiens GN=RCC1 PE=1 SV=1	1054.22	43.94	1	12	12	31	7.69808e+08	44.9406
UniProtKB:P53618	Coatomer subunit beta OS=Homo sapiens GN=COPB1 PE=1 SV=3	1050.13	36.94	1	26	26	53	1.69041e+09	107.074
UniProtKB:P06493	Cell division protein kinase 1 OS=Homo sapiens GN=CDK1 PE=1 SV=2	1049.06	60.27	1	14	15	40	6.97218e+08	34.0599
UniProtKB:P83916	Chromobox protein homolog 1 OS=Homo sapiens GN=CBX1 PE=1 SV=1	1047.25	44.32	1	5	6	23	8.13456e+08	21.4046
UniProtKB:P43246	DNA mismatch repair protein Msh2 OS=Homo sapiens GN=MSH2 PE=1 SV=1	1043.94	29.23	1	21	21	46	4.40665e+08	104.677
UniProtKB:Q9Y617	Phosphoserine aminotransferase OS=Homo sapiens GN=PSAT1 PE=1 SV=2	1043.32	57.03	1	18	18	40	1.17467e+09	40.3968
UniProtKB:P10599	Thioredoxin OS=Homo sapiens GN=TXN PE=1 SV=3	1037.21	66.67	1	5	5	46	7.2718e+09	11.7297
UniProtKB:P27695	DNA-(apurinic or apyrimidinic site) lyase OS=Homo sapiens GN=APEX1 PE=1 SV=2	1036.79	55.35	1	13	13	40	1.17357e+09	35.5322
UniProtKB:P19105	Myosin regulatory light chain 12A OS=Homo sapiens GN=MYL12A PE=1 SV=2	1032.18	63.16	1	0	11	38	1.46235e+09	19.7815
UniProtKB:O14950	Myosin regulatory light chain 12B OS=Homo sapiens GN=MYL12B PE=1 SV=2	1032.18	62.79	1	0	11	38	1.46235e+09	19.7665
UniProtKB:O15371	Eukaryotic translation initiation factor 3 subunit D OS=Homo sapiens GN=EIF3D PE=1 SV=1	1028.33	35.95	1	15	15	30	3.84612e+08	63.9324
UniProtKB:Q9NU22	Midasin OS=Homo sapiens GN=MDN1 PE=1 SV=2	1024.01	8.54	1	31	31	41	123299872	632.42
UniProtKB:Q13428	Treacle protein OS=Homo sapiens GN=TCOF1 PE=1 SV=3	1022.27	16.47	1	18	18	36	3.56157e+08	152.015
UniProtKB:P84090	Enhancer of rudimentary homolog OS=Homo sapiens GN=ERH PE=1 SV=1	1021.31	43.27	1	4	4	26	3.16814e+09	12.251
UniProtKB:Q12931	Heat shock protein 75 kDa, mitochondrial OS=Homo sapiens GN=TRAP1 PE=1 SV=3	1021	29.12	1	17	17	38	7.44561e+09	80.0597
UniProtKB:Q8IUE6	Histone H2A type 2-B OS=Homo sapiens GN=HIST2H2AB PE=1 SV=3	1019.93	46.92	1	0	3	39	3.17572e+10	13.9868
UniProtKB:O75083	WD repeat-containing protein 1 OS=Homo sapiens GN=WDR1 PE=1 SV=4	1019.51	34.49	1	13	13	32	4.03032e+08	66.1519
UniProtKB:P48741	Putative heat shock 70 kDa protein 7 OS=Homo sapiens GN=HSPA7 PE=5 SV=2	1019.43	13.35	1	0	5	47	1.98677e+10	40.2196
UniProtKB:Q99615	DnaJ homolog subfamily C member 7 OS=Homo sapiens GN=DNAJC7 PE=1 SV=2	1018.49	40.89	1	19	19	34	3.08318e+08	56.4047
UniProtKB:P43686	26S protease regulatory subunit 6B OS=Homo sapiens GN=PSMC4 PE=1 SV=2	1016.21	54.78	1	17	18	43	6.53598e+08	47.3365
UniProtKB:Q96QV6	Histone H2A type 1-A OS=Homo sapiens GN=HIST1H2AA PE=1 SV=3	1013.92	35.11	1	0	4	60	3.11811e+10	14.2249
UniProtKB:Q9ULT8	E3 ubiquitin-protein ligase HECTD1 OS=Homo sapiens GN=HECTD1 PE=1 SV=3	1011.98	11.76	1	20	20	31	2.31922e+08	289.203
UniProtKB:Q01518	Adenylyl cyclase-associated protein 1 OS=Homo sapiens GN=CAP1 PE=1 SV=5	1007.15	38.32	1	15	16	40	1.16349e+09	51.8687
UniProtKB:Q9BVP2	Guanine nucleotide-binding protein-like 3 OS=Homo sapiens GN=GNL3 PE=1 SV=2	1004.09	32.6	1	17	17	34	4.17768e+08	61.9545
UniProtKB:Q00341	Vigilin OS=Homo sapiens GN=HDLBP PE=1 SV=2	1000.84	26.81	1	26	26	43	2.96711e+08	141.368
UniProtKB:P61247	40S ribosomal protein S3a OS=Homo sapiens GN=RPS3A PE=1 SV=2	997.954	54.55	1	18	18	67	3.06624e+09	29.9257
UniProtKB:O43719	HIV Tat-specific factor 1 OS=Homo sapiens GN=HTATSF1 PE=1 SV=1	996.218	36.29	1	16	16	30	3.29141e+08	85.8006
UniProtKB:Q99459	Cell division cycle 5-like protein OS=Homo sapiens GN=CDC5L PE=1 SV=2	996.044	28.93	1	15	15	31	423351866	92.1937
UniProtKB:O00299	Chloride intracellular channel protein 1 OS=Homo sapiens GN=CLIC1 PE=1 SV=4	995.615	62.24	1	10	10	25	1.15849e+09	26.9057
UniProtKB:Q15717	ELAV-like protein 1 OS=Homo sapiens GN=ELAVL1 PE=1 SV=2	994.766	44.48	1	10	10	30	1.22389e+09	36.0692
UniProtKB:Q7L014	Probable ATP-dependent RNA helicase DDX46 OS=Homo sapiens GN=DDX46 PE=1 SV=2	992.353	23.76	1	19	19	44	2.03882e+08	117.29
UniProtKB:P13861	cAMP-dependent protein kinase type II-alpha regulatory subunit OS=Homo sapiens GN=PRKAR2A PE=1 SV=2	992.202	46.53	1	13	15	31	2.96134e+08	45.49
UniProtKB:Q9UBT2	SUMO-activating enzyme subunit 2 OS=Homo sapiens GN=UBA2 PE=1 SV=2	991.524	40.94	1	18	18	40	5.60836e+08	71.1792
UniProtKB:P04264	Keratin, type II cytoskeletal 1 OS=Homo sapiens GN=KRT1 PE=1 SV=6	989.681	29.97	1	1	18	41	6.27599e+08	65.999
UniProtKB:Q15084	Protein disulfide-isomerase A6 OS=Homo sapiens GN=PDIA6 PE=1 SV=1	986.816	35	1	12	12	39	2.39836e+09	48.0913
UniProtKB:Q92922	SWI/SNF complex subunit SMARCC1 OS=Homo sapiens GN=SMARCC1 PE=1 SV=3	984.456	28.14	1	19	22	40	3.33773e+08	122.79
UniProtKB:Q06830	Peroxiredoxin-1 OS=Homo sapiens GN=PRDX1 PE=1 SV=1	984.4	73.37	1	11	14	64	1.43267e+10	22.0963
UniProtKB:Q15691	Microtubule-associated protein RP/EB family member 1 OS=Homo sapiens GN=MAPRE1 PE=1 SV=3	984.313	76.12	1	13	15	33	1347543262	29.9802
UniProtKB:P62873	Guanine nucleotide-binding protein G(I)/G(S)/G(T) subunit beta-1 OS=Homo sapiens GN=GNB1 PE=1 SV=3	980.772	38.53	1	5	9	28	7.55239e+08	37.353
UniProtKB:P25789	Proteasome subunit alpha type-4 OS=Homo sapiens GN=PSMA4 PE=1 SV=1	977.162	50.57	1	10	10	32	1.81724e+09	29.4652
UniProtKB:P26038	Moesin OS=Homo sapiens GN=MSN PE=1 SV=3	976.324	37.61	1	15	26	52	1.23207e+09	67.7778
UniProtKB:P35998	26S protease regulatory subunit 7 OS=Homo sapiens GN=PSMC2 PE=1 SV=3	975.208	60.28	1	24	24	53	5.26794e+08	48.6031
UniProtKB:P23921	Ribonucleoside-diphosphate reductase large subunit OS=Homo sapiens GN=RRM1 PE=1 SV=1	974.803	30.81	1	16	16	31	3.72689e+08	90.0125
UniProtKB:P45974	Ubiquitin carboxyl-terminal hydrolase 5 OS=Homo sapiens GN=USP5 PE=1 SV=2	974.726	35.55	1	19	20	39	5.06603e+08	95.7253
UniProtKB:Q14C86	GTPase-activating protein and VPS9 domain-containing protein 1 OS=Homo sapiens GN=GAPVD1 PE=1 SV=2	972.466	12.25	1	13	13	23	1.85752e+08	164.877
UniProtKB:P55265	Double-stranded RNA-specific adenosine deaminase OS=Homo sapiens GN=ADAR PE=1 SV=4	969.837	26.18	1	22	22	40	2.64095e+08	135.981
UniProtKB:P09972	Fructose-bisphosphate aldolase C OS=Homo sapiens GN=ALDOC PE=1 SV=2	967.972	20.05	1	2	4	22	5.25962e+09	39.4312
UniProtKB:P24666	Low molecular weight phosphotyrosine protein phosphatase OS=Homo sapiens GN=ACP1 PE=1 SV=3	966.736	67.72	1	9	9	23	4.03668e+08	18.0308
UniProtKB:CON_P04264	Tax_Id=9606 Gene_Symbol=KRT1 Keratin, type II cytoskeletal 1	966.011	28.57	1	0	17	39	5.83613e+08	65.978
UniProtKB:P47756	F-actin-capping protein subunit beta OS=Homo sapiens GN=CAPZB PE=1 SV=4	965.084	45.85	1	11	11	31	9.49813e+08	31.3308
UniProtKB:P51665	26S proteasome non-ATPase regulatory subunit 7 OS=Homo sapiens GN=PSMD7 PE=1 SV=2	963.234	41.67	1	10	10	33	3.39109e+08	37.0025
UniProtKB:Q93008	Probable ubiquitin carboxyl-terminal hydrolase FAF-X OS=Homo sapiens GN=USP9X PE=1 SV=2	958.629	13.66	1	14	28	42	2.35644e+08	289.356
UniProtKB:P32119	Peroxiredoxin-2 OS=Homo sapiens GN=PRDX2 PE=1 SV=5	958.097	36.36	1	9	10	43	6.11696e+09	21.8782
UniProtKB:P52701	DNA mismatch repair protein Msh6 OS=Homo sapiens GN=MSH6 PE=1 SV=2	957.995	20.51	1	18	18	33	2.47546e+08	152.689
UniProtKB:Q96PK6	RNA-binding protein 14 OS=Homo sapiens GN=RBM14 PE=1 SV=2	952.727	25.26	1	16	16	39	6.66241e+08	69.4489
UniProtKB:O43491	Band 4.1-like protein 2 OS=Homo sapiens GN=EPB41L2 PE=1 SV=1	952.684	22.69	1	16	16	31	3.01673e+08	112.519
UniProtKB:Q92621	Nuclear pore complex protein Nup205 OS=Homo sapiens GN=NUP205 PE=1 SV=3	949.275	15.66	1	28	28	54	2.21271e+08	227.776
UniProtKB:Q9UNS2	COP9 signalosome complex subunit 3 OS=Homo sapiens GN=COPS3 PE=1 SV=3	944.404	40.43	1	11	11	28	3.48705e+08	47.842
UniProtKB:Q9H1E3	Nuclear ubiquitous casein and cyclin-dependent kinases substrate OS=Homo sapiens GN=NUCKS1 PE=1 SV=1	941.775	39.51	1	8	8	32	7.75281e+08	27.28
UniProtKB:Q15149	Plectin OS=Homo sapiens GN=PLEC PE=1 SV=3	940.295	8.09	1	22	26	41	1.7108e+08	531.466
UniProtKB:P84085	ADP-ribosylation factor 5 OS=Homo sapiens GN=ARF5 PE=1 SV=2	939.475	83.33	1	6	11	41	1207779490	20.5166
UniProtKB:Q16576	Histone-binding protein RBBP7 OS=Homo sapiens GN=RBBP7 PE=1 SV=1	937.368	45.65	1	9	14	47	2.36113e+09	47.7902
UniProtKB:P63167	Dynein light chain 1, cytoplasmic OS=Homo sapiens GN=DYNLL1 PE=1 SV=1	937.366	50.56	1	1	4	23	1.45948e+09	10.3591
UniProtKB:Q99714	3-hydroxyacyl-CoA dehydrogenase type-2 OS=Homo sapiens GN=HSD17B10 PE=1 SV=3	936.458	57.47	1	10	10	29	4.05862e+08	26.9061
UniProtKB:Q9BWD1	Acetyl-CoA acetyltransferase, cytosolic OS=Homo sapiens GN=ACAT2 PE=1 SV=2	936.436	55.42	1	11	12	28	1.55406e+09	41.3244
UniProtKB:Q9H361	Polyadenylate-binding protein 3 OS=Homo sapiens GN=PABPC3 PE=1 SV=2	934.982	17.75	1	0	11	42	1.67678e+09	69.9867
UniProtKB:P22061	Protein-L-isoaspartate(D-aspartate) O-methyltransferase OS=Homo sapiens GN=PCMT1 PE=1 SV=3	931.832	61.67	1	9	9	32	8.90513e+08	24.6346
UniProtKB:Q12874	Splicing factor 3A subunit 3 OS=Homo sapiens GN=SF3A3 PE=1 SV=1	931.344	34.93	1	16	16	30	7.70507e+08	58.8123
UniProtKB:O15523	ATP-dependent RNA helicase DDX3Y OS=Homo sapiens GN=DDX3Y PE=1 SV=2	930.948	33.64	1	0	18	46	983518618	73.1081
UniProtKB:Q15459	Splicing factor 3A subunit 1 OS=Homo sapiens GN=SF3A1 PE=1 SV=1	930.647	38.71	1	24	24	50	7.17755e+08	88.8305
UniProtKB:P32969	60S ribosomal protein L9 OS=Homo sapiens GN=RPL9 PE=1 SV=1	928.646	49.48	1	6	6	27	1.61417e+09	21.8498
UniProtKB:P57721	Poly(rC)-binding protein 3 OS=Homo sapiens GN=PCBP3 PE=1 SV=2	928.177	19.68	1	1	6	31	3702174682	39.4403
UniProtKB:P38159	Heterogeneous nuclear ribonucleoprotein G OS=Homo sapiens GN=RBMX PE=1 SV=3	926.743	48.08	1	15	19	48	2.59104e+09	42.3063
UniProtKB:P35221	Catenin alpha-1 OS=Homo sapiens GN=CTNNA1 PE=1 SV=1	925.381	30.24	1	14	17	35	2.36254e+08	100.009
UniProtKB:P09661	U2 small nuclear ribonucleoprotein A' OS=Homo sapiens GN=SNRPA1 PE=1 SV=2	924.866	45.1	1	8	8	25	5.32488e+08	28.3981
UniProtKB:P60891	Ribose-phosphate pyrophosphokinase 1 OS=Homo sapiens GN=PRPS1 PE=1 SV=2	924.397	50	1	4	13	34	1.19577e+09	34.8119
UniProtKB:Q9UMX0	Ubiquilin-1 OS=Homo sapiens GN=UBQLN1 PE=1 SV=2	924.169	35.65	1	6	12	29	5.1199e+08	62.4794
UniProtKB:P18085	ADP-ribosylation factor 4 OS=Homo sapiens GN=ARF4 PE=1 SV=3	920.042	67.78	1	6	10	36	1.27357e+09	20.4977
UniProtKB:Q09028	Histone-binding protein RBBP4 OS=Homo sapiens GN=RBBP4 PE=1 SV=3	919.958	53.65	1	9	14	41	2.64035e+09	47.6261
UniProtKB:O60841	Eukaryotic translation initiation factor 5B OS=Homo sapiens GN=EIF5B PE=1 SV=4	916.487	19.59	1	19	19	35	5.9148e+08	138.742
UniProtKB:P60900	Proteasome subunit alpha type-6 OS=Homo sapiens GN=PSMA6 PE=1 SV=1	914.473	49.19	1	10	10	33	1.06506e+09	27.3818
UniProtKB:O15355	Protein phosphatase 1G OS=Homo sapiens GN=PPM1G PE=1 SV=1	913.179	42.67	1	16	16	37	5.99632e+08	59.2347
UniProtKB:P14314	Glucosidase 2 subunit beta OS=Homo sapiens GN=PRKCSH PE=1 SV=2	911.388	29.73	1	12	12	34	1.26725e+09	59.3878
UniProtKB:P49411	Elongation factor Tu, mitochondrial OS=Homo sapiens GN=TUFM PE=1 SV=2	910.505	43.14	1	17	17	35	878995304	49.5102
UniProtKB:P54136	Arginyl-tRNA synthetase, cytoplasmic OS=Homo sapiens GN=RARS PE=1 SV=2	909.925	43.03	1	22	22	37	4.71972e+08	75.3309
UniProtKB:Q96FW1	Ubiquitin thioesterase OTUB1 OS=Homo sapiens GN=OTUB1 PE=1 SV=2	909.007	53.14	1	12	12	42	6.98208e+08	31.2644
UniProtKB:Q8WXF1	Paraspeckle component 1 OS=Homo sapiens GN=PSPC1 PE=1 SV=1	907.438	34.03	1	11	12	29	1.01711e+09	58.7062
UniProtKB:Q9Y2Z0	Suppressor of G2 allele of SKP1 homolog OS=Homo sapiens GN=SUGT1 PE=1 SV=3	905.045	61.1	1	16	16	30	8.94509e+08	40.9985
UniProtKB:P00492	Hypoxanthine-guanine phosphoribosyltransferase OS=Homo sapiens GN=HPRT1 PE=1 SV=2	903.535	66.51	1	10	11	36	2520558418	24.5636
UniProtKB:Q99623	Prohibitin-2 OS=Homo sapiens GN=PHB2 PE=1 SV=2	903.379	53.18	1	14	14	43	9.76097e+08	33.2759
UniProtKB:Q14166	Tubulin--tyrosine ligase-like protein 12 OS=Homo sapiens GN=TTLL12 PE=1 SV=2	899.883	32.45	1	14	14	29	4.81579e+08	74.356
UniProtKB:Q16543	Hsp90 co-chaperone Cdc37 OS=Homo sapiens GN=CDC37 PE=1 SV=1	898.22	30.42	1	10	10	30	1.77338e+09	44.44
UniProtKB:Q9UNZ2	NSFL1 cofactor p47 OS=Homo sapiens GN=NSFL1C PE=1 SV=2	897.647	37.03	1	9	9	27	5.00644e+08	40.5483
UniProtKB:Q99873	Protein arginine N-methyltransferase 1 OS=Homo sapiens GN=PRMT1 PE=1 SV=2	896.319	48.2	1	13	15	36	8.92743e+08	41.4885
UniProtKB:Q01105	Protein SET OS=Homo sapiens GN=SET PE=1 SV=3	895.769	46.9	1	9	9	39	7.26202e+09	33.4687
UniProtKB:Q07021	Complement component 1 Q subcomponent-binding protein, mitochondrial OS=Homo sapiens GN=C1QBP PE=1 SV=1	894.247	33.69	1	8	8	31	1.89132e+09	31.3426
UniProtKB:Q86Y56	HEAT repeat-containing protein 2 OS=Homo sapiens GN=HEATR2 PE=1 SV=3	892.828	34.15	1	21	21	39	2.31615e+08	93.4341
UniProtKB:P04181	Ornithine aminotransferase, mitochondrial OS=Homo sapiens GN=OAT PE=1 SV=1	891.783	30.52	1	11	11	27	3.83224e+08	48.5042
UniProtKB:P02786	Transferrin receptor protein 1 OS=Homo sapiens GN=TFRC PE=1 SV=2	891.261	23.42	1	14	14	33	2.45921e+08	84.8179
UniProtKB:P07741	Adenine phosphoribosyltransferase OS=Homo sapiens GN=APRT PE=1 SV=2	882.916	31.11	1	5	5	17	9.158e+08	19.5954
UniProtKB:P19623	Spermidine synthase OS=Homo sapiens GN=SRM PE=1 SV=1	878.207	65.56	1	15	15	39	6.82051e+08	33.8027
UniProtKB:P62191	26S protease regulatory subunit 4 OS=Homo sapiens GN=PSMC1 PE=1 SV=1	877.832	36.59	1	12	13	30	3.85131e+08	49.1537
UniProtKB:P48147	Prolyl endopeptidase OS=Homo sapiens GN=PREP PE=1 SV=2	876.559	23.8	1	11	11	30	4.54282e+08	80.648
UniProtKB:P13693	Translationally-controlled tumor protein OS=Homo sapiens GN=TPT1 PE=1 SV=1	871.681	72.67	1	6	8	38	2.77411e+09	19.5826
UniProtKB:P35606	Coatomer subunit beta' OS=Homo sapiens GN=COPB2 PE=1 SV=2	871.428	28.59	1	19	19	46	7.60852e+08	102.422
UniProtKB:O00232	26S proteasome non-ATPase regulatory subunit 12 OS=Homo sapiens GN=PSMD12 PE=1 SV=3	870.573	32.02	1	13	13	28	3.54977e+08	52.8706
UniProtKB:Q8NHW5	60S acidic ribosomal protein P0-like OS=Homo sapiens GN=RPLP0P6 PE=5 SV=1	870.01	31.55	1	0	9	49	3.20606e+09	34.3427
UniProtKB:Q8IY81	Putative rRNA methyltransferase 3 OS=Homo sapiens GN=FTSJ3 PE=1 SV=2	867.882	23.61	1	14	14	26	2.68815e+08	96.4992
UniProtKB:P14174	Macrophage migration inhibitory factor OS=Homo sapiens GN=MIF PE=1 SV=4	867.755	36.52	1	4	4	41	12302945435	12.4682
UniProtKB:Q5H9R7	Serine/threonine-protein phosphatase 6 regulatory subunit 3 OS=Homo sapiens GN=PPP6R3 PE=1 SV=2	864.073	17.18	1	12	12	28	1.16455e+08	97.6076
UniProtKB:P13637	Sodium/potassium-transporting ATPase subunit alpha-3 OS=Homo sapiens GN=ATP1A3 PE=1 SV=3	861.639	14.41	1	0	10	23	4.88615e+08	111.677
UniProtKB:Q9UNM6	26S proteasome non-ATPase regulatory subunit 13 OS=Homo sapiens GN=PSMD13 PE=1 SV=1	861.078	60.64	1	20	20	44	1.28197e+09	42.8911
UniProtKB:Q96A49	Synapse-associated protein 1 OS=Homo sapiens GN=SYAP1 PE=1 SV=1	860.817	52.27	1	15	15	30	3.69451e+08	39.9089
UniProtKB:P56192	Methionyl-tRNA synthetase, cytoplasmic OS=Homo sapiens GN=MARS PE=1 SV=2	860.132	30.11	1	16	16	33	4.92059e+08	101.052
UniProtKB:P17812	CTP synthase 1 OS=Homo sapiens GN=CTPS PE=1 SV=2	858.715	41.46	1	17	19	35	4.24678e+08	66.648
UniProtKB:Q99867	Putative tubulin beta-4q chain OS=Homo sapiens GN=TUBB4Q PE=5 SV=1	858.495	10.14	1	0	5	55	9.2306e+09	48.4034
UniProtKB:P16152	Carbonyl reductase [NADPH] 1 OS=Homo sapiens GN=CBR1 PE=1 SV=3	858.038	64.62	1	11	13	31	8.08151e+08	30.3559
UniProtKB:P62333	26S protease regulatory subunit 10B OS=Homo sapiens GN=PSMC6 PE=1 SV=1	856.024	42.16	1	12	12	35	9.46697e+08	44.1451
UniProtKB:CON_Q3ZBD7	(Bos taurus) Glucose-6-phosphate isomerase	852.574	10.77	1	0	4	23	1.13684e+09	62.831
UniProtKB:O14579	Coatomer subunit epsilon OS=Homo sapiens GN=COPE PE=1 SV=3	851.47	41.23	1	8	8	28	7.70413e+08	34.4603
UniProtKB:Q8N163	Protein KIAA1967 OS=Homo sapiens GN=KIAA1967 PE=1 SV=2	849.939	30.44	1	20	20	35	395383166	102.838
UniProtKB:P11766	Alcohol dehydrogenase class-3 OS=Homo sapiens GN=ADH5 PE=1 SV=4	847.672	29.68	1	9	9	28	6.78473e+08	39.6984
UniProtKB:P28074	Proteasome subunit beta type-5 OS=Homo sapiens GN=PSMB5 PE=1 SV=3	847.17	36.5	1	9	9	25	5.47592e+08	28.4622
UniProtKB:O00231	26S proteasome non-ATPase regulatory subunit 11 OS=Homo sapiens GN=PSMD11 PE=1 SV=3	846.819	43.84	1	15	15	32	1.0076e+09	47.434
UniProtKB:P00505	Aspartate aminotransferase, mitochondrial OS=Homo sapiens GN=GOT2 PE=1 SV=3	845.536	28.14	1	11	11	28	545650236	47.4873
UniProtKB:Q9BZZ5	Apoptosis inhibitor 5 OS=Homo sapiens GN=API5 PE=1 SV=2	840.193	27.06	1	11	11	32	7.12588e+08	57.5251
UniProtKB:P62829	60S ribosomal protein L23 OS=Homo sapiens GN=RPL23 PE=1 SV=1	838.941	59.29	1	9	9	30	2.48601e+09	14.8561
UniProtKB:P50993	Sodium/potassium-transporting ATPase subunit alpha-2 OS=Homo sapiens GN=ATP1A2 PE=1 SV=1	838.35	13.24	1	0	9	20	4.65808e+08	112.193
UniProtKB:O76094	Signal recognition particle 72 kDa protein OS=Homo sapiens GN=SRP72 PE=1 SV=3	837.569	34.87	1	15	16	37	3.22316e+08	74.56
UniProtKB:P09622	Dihydrolipoyl dehydrogenase, mitochondrial OS=Homo sapiens GN=DLD PE=1 SV=2	836.179	31.63	1	11	11	25	4.94582e+08	54.143
UniProtKB:P04632	Calpain small subunit 1 OS=Homo sapiens GN=CAPNS1 PE=1 SV=1	832.379	53.73	1	6	7	15	3.08743e+08	28.2977
UniProtKB:P46777	60S ribosomal protein L5 OS=Homo sapiens GN=RPL5 PE=1 SV=3	829.072	49.83	1	11	11	49	2.79412e+09	34.3407
UniProtKB:O75821	Eukaryotic translation initiation factor 3 subunit G OS=Homo sapiens GN=EIF3G PE=1 SV=2	828.644	50.63	1	14	14	30	8.46309e+08	35.5889
UniProtKB:Q7Z2W4	Zinc finger CCCH-type antiviral protein 1 OS=Homo sapiens GN=ZC3HAV1 PE=1 SV=3	828.3	14.63	1	9	9	19	1.90754e+08	101.367
UniProtKB:P50570	Dynamin-2 OS=Homo sapiens GN=DNM2 PE=1 SV=2	827.793	23.79	1	11	16	30	3.41029e+08	98.0032
UniProtKB:P45880	Voltage-dependent anion-selective channel protein 2 OS=Homo sapiens GN=VDAC2 PE=1 SV=2	827.334	50	1	11	11	31	5.90837e+08	31.5465
UniProtKB:P00491	Purine nucleoside phosphorylase OS=Homo sapiens GN=PNP PE=1 SV=2	827.034	64.36	1	14	14	30	8.21475e+08	32.0972
UniProtKB:P52907	F-actin-capping protein subunit alpha-1 OS=Homo sapiens GN=CAPZA1 PE=1 SV=3	826.407	54.9	1	9	10	27	1.42878e+09	32.9023
UniProtKB:Q15369	Transcription elongation factor B polypeptide 1 OS=Homo sapiens GN=TCEB1 PE=1 SV=1	823.001	65.18	1	6	6	26	6.09492e+08	12.465
UniProtKB:O14828	Secretory carrier-associated membrane protein 3 OS=Homo sapiens GN=SCAMP3 PE=1 SV=3	822.675	23.34	1	6	6	16	2.0076e+08	38.2623
UniProtKB:P39687	Acidic leucine-rich nuclear phosphoprotein 32 family member A OS=Homo sapiens GN=ANP32A PE=1 SV=1	822.586	30.12	1	4	8	33	3.05908e+09	28.5683
UniProtKB:P62995	Transformer-2 protein homolog beta OS=Homo sapiens GN=TRA2B PE=1 SV=1	822.457	38.89	1	9	10	32	515470646	33.6456
UniProtKB:Q5T4S7	E3 ubiquitin-protein ligase UBR4 OS=Homo sapiens GN=UBR4 PE=1 SV=1	822.31	6.89	1	22	22	34	1.02591e+08	573.476
UniProtKB:O15381	Nuclear valosin-containing protein-like OS=Homo sapiens GN=NVL PE=1 SV=1	821.204	26.05	1	16	16	28	1.18372e+08	94.991
UniProtKB:Q9NTK5	Obg-like ATPase 1 OS=Homo sapiens GN=OLA1 PE=1 SV=2	820.538	32.07	1	9	9	30	5.09291e+08	44.7153
UniProtKB:P40925	Malate dehydrogenase, cytoplasmic OS=Homo sapiens GN=MDH1 PE=1 SV=4	819.903	39.82	1	13	13	34	1.74758e+09	36.403
UniProtKB:Q9Y2B0	Protein canopy homolog 2 OS=Homo sapiens GN=CNPY2 PE=1 SV=1	819.62	43.41	1	7	7	21	7.77388e+08	20.6392
UniProtKB:O14744	Protein arginine N-methyltransferase 5 OS=Homo sapiens GN=PRMT5 PE=1 SV=4	813.444	39.4	1	18	18	38	675256222	72.6376
UniProtKB:P23284	Peptidyl-prolyl cis-trans isomerase B OS=Homo sapiens GN=PPIB PE=1 SV=2	812.923	50.46	1	12	12	36	1.05619e+09	23.7275
UniProtKB:Q01813	6-phosphofructokinase type C OS=Homo sapiens GN=PFKP PE=1 SV=2	810.018	23.09	1	11	13	25	1.31263e+08	85.5415
UniProtKB:P51610	Host cell factor 1 OS=Homo sapiens GN=HCFC1 PE=1 SV=2	806.424	16.95	1	19	20	32	2.97477e+08	208.602
UniProtKB:Q9NY33	Dipeptidyl peptidase 3 OS=Homo sapiens GN=DPP3 PE=1 SV=2	806.313	28.36	1	12	12	24	200741056	82.5378
UniProtKB:Q06210	Glucosamine--fructose-6-phosphate aminotransferase [isomerizing] 1 OS=Homo sapiens GN=GFPT1 PE=1 SV=3	804.825	30.19	1	13	16	28	2.48783e+08	78.7563
UniProtKB:O00273	DNA fragmentation factor subunit alpha OS=Homo sapiens GN=DFFA PE=1 SV=1	804.106	35.05	1	9	9	26	5.12938e+08	36.4995
UniProtKB:Q9Y6M1	Insulin-like growth factor 2 mRNA-binding protein 2 OS=Homo sapiens GN=IGF2BP2 PE=1 SV=2	804.067	23.54	1	8	9	24	4.94686e+08	66.0806
UniProtKB:Q13347	Eukaryotic translation initiation factor 3 subunit I OS=Homo sapiens GN=EIF3I PE=1 SV=1	803.516	58.77	1	14	14	33	1.10798e+09	36.4786
UniProtKB:Q9BXJ9	N-alpha-acetyltransferase 15, NatA auxiliary subunit OS=Homo sapiens GN=NAA15 PE=1 SV=1	799.666	26.91	1	18	21	37	3.59312e+08	101.208
UniProtKB:Q9Y2W1	Thyroid hormone receptor-associated protein 3 OS=Homo sapiens GN=THRAP3 PE=1 SV=2	798.77	22.3	1	16	17	36	5.3883e+08	108.601
UniProtKB:P42166	Lamina-associated polypeptide 2, isoform alpha OS=Homo sapiens GN=TMPO PE=1 SV=2	798.74	39.77	1	12	19	35	2.47358e+08	75.4456
UniProtKB:Q8IZL8	Proline-, glutamic acid- and leucine-rich protein 1 OS=Homo sapiens GN=PELP1 PE=1 SV=2	798.301	18.94	1	13	13	30	2.16003e+08	119.624
UniProtKB:Q9UBE0	SUMO-activating enzyme subunit 1 OS=Homo sapiens GN=SAE1 PE=1 SV=1	798.287	44.8	1	13	13	23	4.74782e+08	38.4256
UniProtKB:P62753	40S ribosomal protein S6 OS=Homo sapiens GN=RPS6 PE=1 SV=1	794.942	30.92	1	8	8	30	2.91075e+09	28.663
UniProtKB:Q5VYK3	Proteasome-associated protein ECM29 homolog OS=Homo sapiens GN=ECM29 PE=1 SV=2	794.824	18.54	1	24	24	42	2.40841e+08	204.16
UniProtKB:CON_P35527	Tax_Id=9606 Gene_Symbol=KRT9 Keratin, type I cytoskeletal 9	794.079	28.57	1	0	11	19	2.09256e+08	62.0919
UniProtKB:P35527	Keratin, type I cytoskeletal 9 OS=Homo sapiens GN=KRT9 PE=1 SV=3	794.079	28.57	1	0	11	19	2.09256e+08	62.0268
UniProtKB:Q9H583	HEAT repeat-containing protein 1 OS=Homo sapiens GN=HEATR1 PE=1 SV=3	791.432	15.76	1	25	25	34	298733437	242.215
UniProtKB:Q9UHB9	Signal recognition particle 68 kDa protein OS=Homo sapiens GN=SRP68 PE=1 SV=2	787.013	22.65	1	12	12	26	2.57572e+08	70.6856
UniProtKB:Q13151	Heterogeneous nuclear ribonucleoprotein A0 OS=Homo sapiens GN=HNRNPA0 PE=1 SV=1	783.985	31.15	1	8	8	23	1.43613e+09	30.8218
UniProtKB:P09936	Ubiquitin carboxyl-terminal hydrolase isozyme L1 OS=Homo sapiens GN=UCHL1 PE=1 SV=2	781.933	63.68	1	11	11	42	2.76155e+09	24.8085
UniProtKB:Q13148	TAR DNA-binding protein 43 OS=Homo sapiens GN=TARDBP PE=1 SV=1	781.585	43.48	1	12	12	26	1.09501e+09	44.7113
UniProtKB:O75131	Copine-3 OS=Homo sapiens GN=CPNE3 PE=1 SV=1	780.192	31.1	1	14	15	35	6.45803e+08	60.0921
UniProtKB:Q14498	RNA-binding protein 39 OS=Homo sapiens GN=RBM39 PE=1 SV=2	780.007	37.17	1	14	16	30	5.6675e+08	59.3427
UniProtKB:P39748	Flap endonuclease 1 OS=Homo sapiens GN=FEN1 PE=1 SV=1	779.8	35.26	1	10	10	23	6.25599e+08	42.5661
UniProtKB:P30876	DNA-directed RNA polymerase II subunit RPB2 OS=Homo sapiens GN=POLR2B PE=1 SV=1	775.047	21.04	1	19	19	32	1.48036e+08	133.811
UniProtKB:Q08J23	tRNA (cytosine-5-)-methyltransferase NSUN2 OS=Homo sapiens GN=NSUN2 PE=1 SV=2	773.332	44.85	1	21	21	34	2.98106e+08	86.4158
UniProtKB:P23588	Eukaryotic translation initiation factor 4B OS=Homo sapiens GN=EIF4B PE=1 SV=2	770.442	25.7	1	15	15	34	3.75114e+08	69.1103
UniProtKB:P13804	Electron transfer flavoprotein subunit alpha, mitochondrial OS=Homo sapiens GN=ETFA PE=1 SV=1	769.425	50.15	1	12	12	30	4.65979e+08	35.0576
UniProtKB:P61163	Alpha-centractin OS=Homo sapiens GN=ACTR1A PE=1 SV=1	767.134	47.07	1	7	12	30	7.02565e+08	42.5869
UniProtKB:P54819	Adenylate kinase 2, mitochondrial OS=Homo sapiens GN=AK2 PE=1 SV=2	765.468	66.95	1	13	13	33	6.04033e+08	26.4608
UniProtKB:Q14247	Src substrate cortactin OS=Homo sapiens GN=CTTN PE=1 SV=2	764.329	28.36	1	13	13	30	2.82093e+08	61.5485
UniProtKB:O43399	Tumor protein D54 OS=Homo sapiens GN=TPD52L2 PE=1 SV=2	764.109	66.5	1	10	10	21	8.30539e+08	22.2243
UniProtKB:Q14315	Filamin-C OS=Homo sapiens GN=FLNC PE=1 SV=3	762.71	6.64	1	6	16	36	6.03485e+08	290.841
UniProtKB:O95163	Elongator complex protein 1 OS=Homo sapiens GN=IKBKAP PE=1 SV=3	762.257	17.19	1	15	15	24	1.52143e+08	150.159
UniProtKB:P50454	Serpin H1 OS=Homo sapiens GN=SERPINH1 PE=1 SV=2	761.08	45.45	1	14	14	38	6.79713e+08	46.4112
UniProtKB:Q9NR30	Nucleolar RNA helicase 2 OS=Homo sapiens GN=DDX21 PE=1 SV=5	758.859	27.84	1	15	17	34	4.11269e+08	87.2904
UniProtKB:P36871	Phosphoglucomutase-1 OS=Homo sapiens GN=PGM1 PE=1 SV=3	757.526	44.31	1	21	21	41	3.01913e+08	61.4105
UniProtKB:Q9Y295	Developmentally-regulated GTP-binding protein 1 OS=Homo sapiens GN=DRG1 PE=1 SV=1	755.621	33.24	1	9	9	21	5.11678e+08	40.5168
UniProtKB:Q12996	Cleavage stimulation factor subunit 3 OS=Homo sapiens GN=CSTF3 PE=1 SV=1	753.335	24.83	1	11	11	21	2.35519e+08	82.8687
UniProtKB:P07954	Fumarate hydratase, mitochondrial OS=Homo sapiens GN=FH PE=1 SV=3	750.099	37.84	1	12	12	23	2.96774e+08	54.6022
Ensembl:CON_ENSBTAP00000025008	(Bos taurus) hypothetical protein	749.124	5.41	1	0	4	47	6.62137e+09	59.262
UniProtKB:Q9H4B7	Tubulin beta-1 chain OS=Homo sapiens GN=TUBB1 PE=1 SV=1	749.124	6.43	1	0	4	47	6.62137e+09	50.2946
UniProtKB:P17174	Aspartate aminotransferase, cytoplasmic OS=Homo sapiens GN=GOT1 PE=1 SV=3	749.066	45.04	1	12	12	27	4.39204e+08	46.2185
UniProtKB:Q13642	Four and a half LIM domains protein 1 OS=Homo sapiens GN=FHL1 PE=1 SV=4	748.875	25.7	1	7	7	22	7.1872e+08	36.2386
UniProtKB:Q9NR45	Sialic acid synthase OS=Homo sapiens GN=NANS PE=1 SV=2	748.58	33.7	1	9	9	21	476447975	40.2815
UniProtKB:P62318	Small nuclear ribonucleoprotein Sm D3 OS=Homo sapiens GN=SNRPD3 PE=1 SV=1	746.837	53.17	1	5	5	24	2649086949	13.9073
UniProtKB:Q9BWF3	RNA-binding protein 4 OS=Homo sapiens GN=RBM4 PE=1 SV=1	742.155	49.73	1	3	16	30	4.90289e+08	40.2887
UniProtKB:Q9Y5S9	RNA-binding protein 8A OS=Homo sapiens GN=RBM8A PE=1 SV=1	741.498	55.75	1	6	6	23	1.05926e+09	19.8767
UniProtKB:Q6P2E9	Enhancer of mRNA-decapping protein 4 OS=Homo sapiens GN=EDC4 PE=1 SV=1	740.611	28.19	1	23	23	37	305995032	151.567
UniProtKB:P00918	Carbonic anhydrase 2 OS=Homo sapiens GN=CA2 PE=1 SV=2	739.437	54.62	1	10	10	35	1.12597e+09	29.2279
UniProtKB:Q16643	Drebrin OS=Homo sapiens GN=DBN1 PE=1 SV=4	738.226	32.82	1	16	16	31	7.68471e+08	71.3854
UniProtKB:Q9H3U1	Protein unc-45 homolog A OS=Homo sapiens GN=UNC45A PE=1 SV=1	737.4	31.14	1	21	21	33	1.90535e+08	103.011
UniProtKB:P55036	26S proteasome non-ATPase regulatory subunit 4 OS=Homo sapiens GN=PSMD4 PE=1 SV=1	733.922	39.52	1	9	11	22	4.03676e+08	40.7112
UniProtKB:Q96P70	Importin-9 OS=Homo sapiens GN=IPO9 PE=1 SV=3	733.407	17	1	13	13	26	3.7402e+08	115.889
UniProtKB:Q8NBS9	Thioredoxin domain-containing protein 5 OS=Homo sapiens GN=TXNDC5 PE=1 SV=2	733.192	29.63	1	10	10	28	1.07748e+09	47.5987
UniProtKB:Q15075	Early endosome antigen 1 OS=Homo sapiens GN=EEA1 PE=1 SV=2	729.813	14.95	1	15	15	24	85918271	162.367
UniProtKB:Q8WVM8	Sec1 family domain-containing protein 1 OS=Homo sapiens GN=SCFD1 PE=1 SV=4	728.29	27.26	1	11	11	20	2.31605e+08	72.3341
UniProtKB:P16403	Histone H1.2 OS=Homo sapiens GN=HIST1H1C PE=1 SV=2	725.047	23.94	1	1	7	30	5.1658e+09	21.3517
UniProtKB:Q16555	Dihydropyrimidinase-related protein 2 OS=Homo sapiens GN=DPYSL2 PE=1 SV=1	725.029	33.74	1	11	15	28	2.58107e+08	62.2546
UniProtKB:P40429	60S ribosomal protein L13a OS=Homo sapiens GN=RPL13A PE=1 SV=2	724.457	37.93	1	5	8	29	1.38016e+09	23.5624
UniProtKB:Q9BVJ6	U3 small nucleolar RNA-associated protein 14 homolog A OS=Homo sapiens GN=UTP14A PE=1 SV=1	723.425	22.18	1	9	13	22	201716998	87.9241
UniProtKB:P17858	6-phosphofructokinase, liver type OS=Homo sapiens GN=PFKL PE=1 SV=6	721.68	25.77	1	10	12	22	2.14809e+08	84.9642
UniProtKB:O00151	PDZ and LIM domain protein 1 OS=Homo sapiens GN=PDLIM1 PE=1 SV=4	720.975	67.48	1	14	14	26	4.88115e+08	36.049
UniProtKB:P41091	Eukaryotic translation initiation factor 2 subunit 3 OS=Homo sapiens GN=EIF2S3 PE=1 SV=3	719.319	33.47	1	2	11	29	6.2005e+08	51.0772
UniProtKB:O95232	Luc7-like protein 3 OS=Homo sapiens GN=LUC7L3 PE=1 SV=2	718.61	26.62	1	11	11	22	5.70878e+08	51.4351
UniProtKB:P49419	Alpha-aminoadipic semialdehyde dehydrogenase OS=Homo sapiens GN=ALDH7A1 PE=1 SV=5	717.487	30.61	1	10	10	19	2.96337e+08	58.4501
UniProtKB:Q01469	Fatty acid-binding protein, epidermal OS=Homo sapiens GN=FABP5 PE=1 SV=3	715.34	66.67	1	7	8	26	1.20278e+09	15.1546
UniProtKB:Q9Y263	Phospholipase A-2-activating protein OS=Homo sapiens GN=PLAA PE=1 SV=2	714.05	28.05	1	16	16	25	8.96101e+07	87.1014
UniProtKB:Q9NSD9	Phenylalanyl-tRNA synthetase beta chain OS=Homo sapiens GN=FARSB PE=1 SV=3	712.119	28.35	1	16	16	40	7.74894e+08	66.0735
UniProtKB:P37837	Transaldolase OS=Homo sapiens GN=TALDO1 PE=1 SV=2	710.506	36.8	1	13	13	45	1.49817e+09	37.5165
UniProtKB:P55010	Eukaryotic translation initiation factor 5 OS=Homo sapiens GN=EIF5 PE=1 SV=2	709.025	27.38	1	9	9	27	3.86985e+08	49.1918
UniProtKB:Q9Y285	Phenylalanyl-tRNA synthetase alpha chain OS=Homo sapiens GN=FARSA PE=1 SV=3	708.571	17.13	1	6	6	19	3.62594e+08	57.5275
UniProtKB:O43264	Centromere/kinetochore protein zw10 homolog OS=Homo sapiens GN=ZW10 PE=1 SV=3	708.314	22.85	1	13	13	19	1.74369e+08	88.7729
UniProtKB:P43490	Nicotinamide phosphoribosyltransferase OS=Homo sapiens GN=NAMPT PE=1 SV=1	707.822	34.42	1	11	11	25	7.29903e+08	55.4866
UniProtKB:P47897	Glutaminyl-tRNA synthetase OS=Homo sapiens GN=QARS PE=1 SV=1	706.117	34.84	1	22	22	31	1.89243e+08	87.7429
UniProtKB:P67775	Serine/threonine-protein phosphatase 2A catalytic subunit alpha isoform OS=Homo sapiens GN=PPP2CA PE=1 SV=1	705.22	47.57	1	2	12	24	8.95663e+08	35.5714
UniProtKB:P62906	60S ribosomal protein L10a OS=Homo sapiens GN=RPL10A PE=1 SV=2	703.816	40.55	1	9	9	44	2.18153e+09	24.8155
UniProtKB:O60271	C-Jun-amino-terminal kinase-interacting protein 4 OS=Homo sapiens GN=SPAG9 PE=1 SV=4	703.594	16.43	1	13	13	22	162539746	146.115
UniProtKB:Q14651	Plastin-1 OS=Homo sapiens GN=PLS1 PE=1 SV=2	702.834	17.97	1	5	8	27	1.91268e+09	70.2093
UniProtKB:P31930	Cytochrome b-c1 complex subunit 1, mitochondrial OS=Homo sapiens GN=UQCRC1 PE=1 SV=3	701.472	33.13	1	9	9	18	1.62936e+08	52.6124
UniProtKB:O00267	Transcription elongation factor SPT5 OS=Homo sapiens GN=SUPT5H PE=1 SV=1	701.121	23.92	1	17	17	31	2.87942e+08	120.925
UniProtKB:Q8WWM7	Ataxin-2-like protein OS=Homo sapiens GN=ATXN2L PE=1 SV=2	697.067	17.77	1	15	15	29	1.55904e+08	113.304
UniProtKB:P67870	Casein kinase II subunit beta OS=Homo sapiens GN=CSNK2B PE=1 SV=1	696.735	37.67	1	6	6	20	6.36929e+08	24.926
UniProtKB:P08243	Asparagine synthetase [glutamine-hydrolyzing] OS=Homo sapiens GN=ASNS PE=1 SV=4	696.719	29.41	1	13	13	30	6.00864e+08	64.3286
UniProtKB:Q14789	Golgin subfamily B member 1 OS=Homo sapiens GN=GOLGB1 PE=1 SV=2	695.36	7.92	1	17	17	26	8.83457e+07	375.79
UniProtKB:P62495	Eukaryotic peptide chain release factor subunit 1 OS=Homo sapiens GN=ETF1 PE=1 SV=3	695.346	37.53	1	13	13	29	5.9978e+08	49.0002
UniProtKB:O14929	Histone acetyltransferase type B catalytic subunit OS=Homo sapiens GN=HAT1 PE=1 SV=1	694.265	40.33	1	11	12	24	868494012	49.4808
UniProtKB:P68400	Casein kinase II subunit alpha OS=Homo sapiens GN=CSNK2A1 PE=1 SV=1	692.712	43.48	1	12	12	25	6.95492e+08	45.1148
UniProtKB:P30566	Adenylosuccinate lyase OS=Homo sapiens GN=ADSL PE=1 SV=2	692.494	36.78	1	12	12	28	6.85136e+08	54.854
UniProtKB:Q9UMS4	Pre-mRNA-processing factor 19 OS=Homo sapiens GN=PRPF19 PE=1 SV=1	692	42.46	1	13	13	36	1.43554e+09	55.1463
UniProtKB:P28838	Cytosol aminopeptidase OS=Homo sapiens GN=LAP3 PE=1 SV=3	690.741	43.35	1	18	18	33	339194176	56.1308
UniProtKB:O95433	Activator of 90 kDa heat shock protein ATPase homolog 1 OS=Homo sapiens GN=AHSA1 PE=1 SV=1	689.477	50.3	1	14	14	31	1.07532e+09	38.2503
UniProtKB:P31350	Ribonucleoside-diphosphate reductase subunit M2 OS=Homo sapiens GN=RRM2 PE=1 SV=1	683.658	41.65	1	12	13	27	3.93918e+08	44.8488
UniProtKB:P06280	Alpha-galactosidase A OS=Homo sapiens GN=GLA PE=1 SV=1	682.864	24.48	1	8	8	17	2.93736e+08	48.7349
UniProtKB:P30040	Endoplasmic reticulum resident protein 29 OS=Homo sapiens GN=ERP29 PE=1 SV=4	682.675	39.85	1	8	8	24	709747138	28.9752
UniProtKB:P15170	Eukaryotic peptide chain release factor GTP-binding subunit ERF3A OS=Homo sapiens GN=GSPT1 PE=1 SV=1	680.012	38.68	1	8	16	37	7.82648e+08	55.7203
UniProtKB:Q9P258	Protein RCC2 OS=Homo sapiens GN=RCC2 PE=1 SV=2	678.785	42.34	1	18	18	41	7.87374e+08	56.0492
UniProtKB:Q9P2E9	Ribosome-binding protein 1 OS=Homo sapiens GN=RRBP1 PE=1 SV=4	677.784	14.26	1	13	13	24	7.05735e+07	152.381
UniProtKB:P51858	Hepatoma-derived growth factor OS=Homo sapiens GN=HDGF PE=1 SV=1	676.545	60.42	1	12	12	35	1.1091e+09	26.7719
UniProtKB:P56537	Eukaryotic translation initiation factor 6 OS=Homo sapiens GN=EIF6 PE=1 SV=1	676.299	42.86	1	6	6	20	8.53684e+08	26.5822
UniProtKB:Q8IYB3	Serine/arginine repetitive matrix protein 1 OS=Homo sapiens GN=SRRM1 PE=1 SV=2	674.858	12.5	1	8	8	22	5.98783e+08	102.274
UniProtKB:P08195	4F2 cell-surface antigen heavy chain OS=Homo sapiens GN=SLC3A2 PE=1 SV=3	674.64	23.97	1	11	11	24	5.58746e+08	67.9517
UniProtKB:P98179	Putative RNA-binding protein 3 OS=Homo sapiens GN=RBM3 PE=1 SV=1	674.43	55.41	1	5	5	20	1.24685e+09	17.16
UniProtKB:Q6PJT7	Zinc finger CCCH domain-containing protein 14 OS=Homo sapiens GN=ZC3H14 PE=1 SV=1	672.087	26.36	1	15	15	26	1.64607e+08	82.8233
UniProtKB:Q9BT78	COP9 signalosome complex subunit 4 OS=Homo sapiens GN=COPS4 PE=1 SV=1	671.765	41.87	1	13	13	23	1.96224e+08	46.2397
UniProtKB:Q2VIR3	Eukaryotic translation initiation factor 2 subunit 3-like protein OS=Homo sapiens GN=EIF2S3L PE=1 SV=2	671.055	26.69	1	0	9	25	6.2005e+08	51.1962
UniProtKB:Q9UQE7	Structural maintenance of chromosomes protein 3 OS=Homo sapiens GN=SMC3 PE=1 SV=2	671.027	19.88	1	19	19	26	2.47074e+08	141.454
UniProtKB:P62277	40S ribosomal protein S13 OS=Homo sapiens GN=RPS13 PE=1 SV=2	668.533	26.49	1	5	5	39	2.9951e+09	17.2117
UniProtKB:A6NKT7	RanBP2-like and GRIP domain-containing protein 3 OS=Homo sapiens GN=RGPD3 PE=2 SV=1	668.118	9.29	1	0	13	22	1.51423e+08	198.27
UniProtKB:Q15436	Protein transport protein Sec23A OS=Homo sapiens GN=SEC23A PE=1 SV=2	667.98	25.75	1	11	12	21	1.05813e+08	86.1053
UniProtKB:P24928	DNA-directed RNA polymerase II subunit RPB1 OS=Homo sapiens GN=POLR2A PE=1 SV=2	667.882	10.1	1	10	10	16	4.65003e+07	217.039
UniProtKB:P33176	Kinesin-1 heavy chain OS=Homo sapiens GN=KIF5B PE=1 SV=1	667.694	26.17	1	13	17	27	1.56652e+08	109.617
UniProtKB:Q9BXP5	Serrate RNA effector molecule homolog OS=Homo sapiens GN=SRRT PE=1 SV=1	667.498	24.89	1	19	19	37	3.91592e+08	100.604
UniProtKB:Q9UJU6	Drebrin-like protein OS=Homo sapiens GN=DBNL PE=1 SV=1	665.075	33.49	1	12	12	25	2.65149e+08	48.1776
UniProtKB:P52788	Spermine synthase OS=Homo sapiens GN=SMS PE=1 SV=2	664.23	36.07	1	10	10	22	2.37145e+08	41.2418
UniProtKB:P50502	Hsc70-interacting protein OS=Homo sapiens GN=ST13 PE=1 SV=2	663.941	27.64	1	0	10	38	2.48738e+09	41.3055
UniProtKB:O75122	CLIP-associating protein 2 OS=Homo sapiens GN=CLASP2 PE=1 SV=2	663.801	9.27	1	5	8	18	2.9992e+08	141.046
UniProtKB:P55196	Afadin OS=Homo sapiens GN=MLLT4 PE=1 SV=3	663.729	8.06	1	10	10	18	77924571	206.676
UniProtKB:P10155	60 kDa SS-A/Ro ribonucleoprotein OS=Homo sapiens GN=TROVE2 PE=1 SV=2	663.35	32.16	1	14	14	26	3.28403e+08	60.6312
UniProtKB:P54727	UV excision repair protein RAD23 homolog B OS=Homo sapiens GN=RAD23B PE=1 SV=1	662.33	39.12	1	11	13	28	6.25883e+08	43.1446
UniProtKB:Q9NVI1	Fanconi anemia group I protein OS=Homo sapiens GN=FANCI PE=1 SV=4	660.824	16.19	1	16	16	28	1.55901e+08	149.229
UniProtKB:P24752	Acetyl-CoA acetyltransferase, mitochondrial OS=Homo sapiens GN=ACAT1 PE=1 SV=1	659.051	47.07	1	13	13	22	5.17702e+08	45.1706
UniProtKB:Q9Y266	Nuclear migration protein nudC OS=Homo sapiens GN=NUDC PE=1 SV=1	658.606	52.57	1	16	16	35	1.10566e+09	38.2191
UniProtKB:A5YKK6	CCR4-NOT transcription complex subunit 1 OS=Homo sapiens GN=CNOT1 PE=1 SV=2	657.407	15.36	1	28	28	40	1.9309e+08	266.768
UniProtKB:Q07020	60S ribosomal protein L18 OS=Homo sapiens GN=RPL18 PE=1 SV=2	656.964	35.64	1	8	8	25	4.05106e+09	21.6211
UniProtKB:Q92538	Golgi-specific brefeldin A-resistance guanine nucleotide exchange factor 1 OS=Homo sapiens GN=GBF1 PE=1 SV=2	656.647	10.76	1	12	13	24	1.49636e+09	206.315
UniProtKB:Q9BTE3	UPF0557 protein C10orf119 OS=Homo sapiens GN=C10orf119 PE=1 SV=2	656.315	22.9	1	12	12	23	2.14581e+08	72.9338
UniProtKB:Q9UKV3	Apoptotic chromatin condensation inducer in the nucleus OS=Homo sapiens GN=ACIN1 PE=1 SV=2	654.54	18.12	1	17	17	30	3.12285e+08	151.771
UniProtKB:Q93009	Ubiquitin carboxyl-terminal hydrolase 7 OS=Homo sapiens GN=USP7 PE=1 SV=2	654.033	31.03	1	23	23	35	4.83244e+08	128.22
UniProtKB:O43242	26S proteasome non-ATPase regulatory subunit 3 OS=Homo sapiens GN=PSMD3 PE=1 SV=2	653.516	38.39	1	17	17	32	4.52412e+08	60.9395
UniProtKB:Q9C0B1	Alpha-ketoglutarate-dependent dioxygenase FTO OS=Homo sapiens GN=FTO PE=1 SV=3	653.315	20.79	1	7	7	12	134697048	58.2449
UniProtKB:P49756	RNA-binding protein 25 OS=Homo sapiens GN=RBM25 PE=1 SV=3	651.139	19.45	1	12	12	24	334260751	100.124
UniProtKB:Q92688	Acidic leucine-rich nuclear phosphoprotein 32 family member B OS=Homo sapiens GN=ANP32B PE=1 SV=1	647.645	35.46	1	6	9	23	2.77369e+09	28.7703
UniProtKB:P09429	High mobility group protein B1 OS=Homo sapiens GN=HMGB1 PE=1 SV=3	644.99	37.21	1	3	12	40	3.1561e+09	24.8782
UniProtKB:Q99798	Aconitate hydratase, mitochondrial OS=Homo sapiens GN=ACO2 PE=1 SV=2	644.93	23.33	1	12	12	21	175788800	85.3719
UniProtKB:P48444	Coatomer subunit delta OS=Homo sapiens GN=ARCN1 PE=1 SV=1	644.058	37.18	1	15	15	31	5.93231e+08	57.1741
UniProtKB:P54920	Alpha-soluble NSF attachment protein OS=Homo sapiens GN=NAPA PE=1 SV=3	642.208	46.44	1	8	10	21	2.73488e+08	33.2113
UniProtKB:Q9Y277	Voltage-dependent anion-selective channel protein 3 OS=Homo sapiens GN=VDAC3 PE=1 SV=1	642.181	22.26	1	7	7	19	5.55149e+08	30.6393
UniProtKB:P47813	Eukaryotic translation initiation factor 1A, X-chromosomal OS=Homo sapiens GN=EIF1AX PE=1 SV=2	641.627	31.25	1	1	4	21	7.73196e+08	16.4502
UniProtKB:Q8NCA5	Protein FAM98A OS=Homo sapiens GN=FAM98A PE=1 SV=1	641.19	18.69	1	6	6	12	1.42891e+08	55.3663
UniProtKB:P11908	Ribose-phosphate pyrophosphokinase 2 OS=Homo sapiens GN=PRPS2 PE=1 SV=2	640.795	36.48	1	1	9	23	9.68079e+08	34.747
UniProtKB:P18583	Protein SON OS=Homo sapiens GN=SON PE=1 SV=4	640.559	10.1	1	16	16	30	1.91972e+08	263.664
UniProtKB:O60739	Eukaryotic translation initiation factor 1b OS=Homo sapiens GN=EIF1B PE=1 SV=2	639.767	80.53	1	4	9	20	9.17265e+08	12.8157
UniProtKB:P15311	Ezrin OS=Homo sapiens GN=EZR PE=1 SV=4	638.496	41.81	1	17	27	48	1.05127e+09	69.3697
UniProtKB:Q32MZ4	Leucine-rich repeat flightless-interacting protein 1 OS=Homo sapiens GN=LRRFIP1 PE=1 SV=2	637.847	21.16	1	11	12	21	2.05905e+08	89.1987
UniProtKB:O14602	Eukaryotic translation initiation factor 1A, Y-chromosomal OS=Homo sapiens GN=EIF1AY PE=1 SV=4	637.4	24.31	1	0	3	20	4.39762e+08	16.4323
UniProtKB:Q7Z3J3	RanBP2-like and GRIP domain-containing protein 4 OS=Homo sapiens GN=RGPD4 PE=2 SV=2	636.967	8.61	1	0	12	20	1.35178e+08	198.072
UniProtKB:O60684	Importin subunit alpha-7 OS=Homo sapiens GN=KPNA6 PE=1 SV=1	636.873	19.22	1	3	8	20	4.32502e+08	59.9915
UniProtKB:Q96I24	Far upstream element-binding protein 3 OS=Homo sapiens GN=FUBP3 PE=1 SV=2	632.878	47.9	1	19	20	36	5.52479e+08	61.6022
UniProtKB:Q08752	Peptidyl-prolyl cis-trans isomerase D OS=Homo sapiens GN=PPID PE=1 SV=3	632.731	45.14	1	15	15	28	1.95368e+08	40.7379
UniProtKB:A6NHL2	Tubulin alpha chain-like 3 OS=Homo sapiens GN=TUBAL3 PE=1 SV=2	630.58	10.31	1	1	5	33	4.69231e+09	49.8767
UniProtKB:P35637	RNA-binding protein FUS OS=Homo sapiens GN=FUS PE=1 SV=1	630.562	16.73	1	7	9	31	3.13753e+09	53.3938
UniProtKB:P26196	Probable ATP-dependent RNA helicase DDX6 OS=Homo sapiens GN=DDX6 PE=1 SV=2	629.644	42.24	1	13	13	22	4.5396e+08	54.3823
UniProtKB:O60216	Double-strand-break repair protein rad21 homolog OS=Homo sapiens GN=RAD21 PE=1 SV=2	629.088	24.25	1	9	10	18	7.72377e+07	71.6447
UniProtKB:Q8N9T8	Protein KRI1 homolog OS=Homo sapiens GN=KRI1 PE=1 SV=2	628.657	23.84	1	10	10	16	194330878	83.2008
UniProtKB:P12081	Histidyl-tRNA synthetase, cytoplasmic OS=Homo sapiens GN=HARS PE=1 SV=2	628.137	36.35	1	12	16	29	4.42005e+08	57.3742
UniProtKB:O43852	Calumenin OS=Homo sapiens GN=CALU PE=1 SV=2	626.828	49.84	1	11	11	23	6.21007e+08	37.0835
UniProtKB:Q9ULC4	Malignant T cell-amplified sequence 1 OS=Homo sapiens GN=MCTS1 PE=1 SV=1	626.44	51.93	1	6	6	19	1.00024e+08	20.5418
UniProtKB:P84103	Serine/arginine-rich splicing factor 3 OS=Homo sapiens GN=SRSF3 PE=1 SV=1	626.102	45.73	1	7	8	36	4.68998e+09	19.3179
UniProtKB:Q8NC51	Plasminogen activator inhibitor 1 RNA-binding protein OS=Homo sapiens GN=SERBP1 PE=1 SV=2	625.637	45.34	1	14	14	36	595223098	44.9385
UniProtKB:P62826	GTP-binding nuclear protein Ran OS=Homo sapiens GN=RAN PE=1 SV=3	625.199	40.74	1	9	9	34	4.67309e+09	24.4076
UniProtKB:P26640	Valyl-tRNA synthetase OS=Homo sapiens GN=VARS PE=1 SV=4	624.856	15.03	1	14	14	22	1.65465e+08	140.387
UniProtKB:Q9NUQ9	Protein FAM49B OS=Homo sapiens GN=FAM49B PE=1 SV=1	624.358	45.06	1	8	9	22	2.91949e+08	36.7246
UniProtKB:Q9UI12	V-type proton ATPase subunit H OS=Homo sapiens GN=ATP6V1H PE=1 SV=1	622.945	22.36	1	8	8	22	2.47226e+08	55.8471
UniProtKB:P68036	Ubiquitin-conjugating enzyme E2 L3 OS=Homo sapiens GN=UBE2L3 PE=1 SV=1	622.417	72.73	1	9	9	32	3017100351	17.8502
UniProtKB:Q9NZL4	Hsp70-binding protein 1 OS=Homo sapiens GN=HSPBP1 PE=1 SV=1	622.099	36.19	1	11	11	24	1.84365e+08	39.4485
UniProtKB:P42771	Cyclin-dependent kinase inhibitor 2A, isoforms 1/2/3 OS=Homo sapiens GN=CDKN2A PE=1 SV=2	620.973	62.18	1	4	6	21	6.19687e+08	16.5224
UniProtKB:P40222	Alpha-taxilin OS=Homo sapiens GN=TXLNA PE=1 SV=3	620.782	34.07	1	13	13	25	2.61904e+08	61.8532
UniProtKB:Q9UBF2	Coatomer subunit gamma-2 OS=Homo sapiens GN=COPG2 PE=1 SV=1	618.832	18.37	1	10	13	27	4.20769e+08	97.5596
UniProtKB:O00303	Eukaryotic translation initiation factor 3 subunit F OS=Homo sapiens GN=EIF3F PE=1 SV=1	618.657	33.33	1	11	11	29	7.4564e+08	37.5402
UniProtKB:P62917	60S ribosomal protein L8 OS=Homo sapiens GN=RPL8 PE=1 SV=2	618.02	35.02	1	10	10	32	3.23349e+09	28.0073
UniProtKB:P25788	Proteasome subunit alpha type-3 OS=Homo sapiens GN=PSMA3 PE=1 SV=2	617.624	38.04	1	9	9	24	8.21276e+08	28.4151
UniProtKB:P61604	10 kDa heat shock protein, mitochondrial OS=Homo sapiens GN=HSPE1 PE=1 SV=2	617.603	68.63	1	9	9	27	2.2233e+09	10.9249
UniProtKB:Q58FF6	Putative heat shock protein HSP 90-beta 4 OS=Homo sapiens GN=HSP90AB4P PE=5 SV=1	614.183	9.11	1	2	7	40	1.41848e+10	58.2276
UniProtKB:P14868	Aspartyl-tRNA synthetase, cytoplasmic OS=Homo sapiens GN=DARS PE=1 SV=2	613.768	43.11	1	20	20	39	681540239	57.1
UniProtKB:Q5BKZ1	Zinc finger protein 326 OS=Homo sapiens GN=ZNF326 PE=1 SV=2	613.668	29.38	1	13	13	28	3.62396e+08	65.6131
UniProtKB:P30520	Adenylosuccinate synthetase isozyme 2 OS=Homo sapiens GN=ADSS PE=1 SV=3	613.033	21.27	1	8	8	20	5.60995e+08	50.0658
UniProtKB:P45973	Chromobox protein homolog 5 OS=Homo sapiens GN=CBX5 PE=1 SV=1	611.14	48.17	1	7	8	25	7.3765e+08	22.2111
UniProtKB:Q14257	Reticulocalbin-2 OS=Homo sapiens GN=RCN2 PE=1 SV=1	610.956	41.32	1	8	8	15	6.61718e+08	36.8536
UniProtKB:Q9H0A0	N-acetyltransferase 10 OS=Homo sapiens GN=NAT10 PE=1 SV=2	610.596	16.29	1	12	12	20	114480372	115.657
UniProtKB:Q8N0X7	Spartin OS=Homo sapiens GN=SPG20 PE=1 SV=1	609.81	18.62	1	8	8	20	1.62727e+08	72.7878
UniProtKB:Q9UMR2	ATP-dependent RNA helicase DDX19B OS=Homo sapiens GN=DDX19B PE=1 SV=1	609.797	32.36	1	1	11	19	3.11443e+08	53.8928
UniProtKB:P33316	Deoxyuridine 5'-triphosphate nucleotidohydrolase, mitochondrial OS=Homo sapiens GN=DUT PE=1 SV=3	608.972	38.49	1	7	7	18	586435471	26.6897
UniProtKB:P62888	60S ribosomal protein L30 OS=Homo sapiens GN=RPL30 PE=1 SV=2	607.658	58.26	1	7	7	27	2.55691e+09	12.7757
UniProtKB:P40855	Peroxisomal biogenesis factor 19 OS=Homo sapiens GN=PEX19 PE=1 SV=1	606.955	35.12	1	7	7	19	2.24175e+08	32.7856
UniProtKB:Q9UN86	Ras GTPase-activating protein-binding protein 2 OS=Homo sapiens GN=G3BP2 PE=1 SV=2	604.309	26.76	1	11	11	29	5.11824e+08	54.0878
UniProtKB:P20042	Eukaryotic translation initiation factor 2 subunit 2 OS=Homo sapiens GN=EIF2S2 PE=1 SV=2	603.774	34.53	1	3	11	25	3.04797e+08	38.3644
UniProtKB:P49903	Selenide, water dikinase 1 OS=Homo sapiens GN=SEPHS1 PE=1 SV=2	603.171	42.35	1	9	9	17	2.54991e+08	42.8827
UniProtKB:P61158	Actin-related protein 3 OS=Homo sapiens GN=ACTR3 PE=1 SV=3	602.949	39	1	11	12	28	5.8406e+08	47.341
UniProtKB:Q92797	Symplekin OS=Homo sapiens GN=SYMPK PE=1 SV=2	602.823	14.29	1	12	12	18	1.51297e+08	141.059
UniProtKB:P00568	Adenylate kinase isoenzyme 1 OS=Homo sapiens GN=AK1 PE=1 SV=3	602.397	44.33	1	6	6	17	6.96732e+08	21.6213
UniProtKB:Q15046	Lysyl-tRNA synthetase OS=Homo sapiens GN=KARS PE=1 SV=3	601.812	33	1	15	15	34	639910297	68.0046
UniProtKB:Q9GZL7	Ribosome biogenesis protein WDR12 OS=Homo sapiens GN=WDR12 PE=1 SV=2	600.182	33.1	1	10	10	20	9.72539e+08	47.6777
UniProtKB:Q15637	Splicing factor 1 OS=Homo sapiens GN=SF1 PE=1 SV=4	599.018	24.1	1	11	11	35	5.53172e+08	68.2859
UniProtKB:Q2TAY7	WD40 repeat-containing protein SMU1 OS=Homo sapiens GN=SMU1 PE=1 SV=2	598.732	30.8	1	13	13	32	4.27695e+08	57.5072
UniProtKB:Q9Y2A7	Nck-associated protein 1 OS=Homo sapiens GN=NCKAP1 PE=1 SV=1	597.18	13.3	1	11	11	23	103570747	128.707
UniProtKB:P35268	60S ribosomal protein L22 OS=Homo sapiens GN=RPL22 PE=1 SV=2	595.841	50.78	1	4	4	20	5.09532e+09	14.7778
UniProtKB:P37108	Signal recognition particle 14 kDa protein OS=Homo sapiens GN=SRP14 PE=1 SV=2	595.678	35.29	1	5	5	14	1.72215e+09	14.5608
UniProtKB:Q13620	Cullin-4B OS=Homo sapiens GN=CUL4B PE=1 SV=4	595.305	23.11	1	13	19	35	2.31613e+08	103.916
UniProtKB:Q96KR1	Zinc finger RNA-binding protein OS=Homo sapiens GN=ZFR PE=1 SV=2	594.96	12.1	1	9	9	16	9.89543e+08	116.939
UniProtKB:Q9Y3Z3	SAM domain and HD domain-containing protein 1 OS=Homo sapiens GN=SAMHD1 PE=1 SV=2	593.732	27.48	1	15	15	27	1.90544e+08	72.1548
UniProtKB:P31949	Protein S100-A11 OS=Homo sapiens GN=S100A11 PE=1 SV=2	593.274	39.05	1	4	4	13	410519398	11.7328
UniProtKB:P62280	40S ribosomal protein S11 OS=Homo sapiens GN=RPS11 PE=1 SV=3	592.866	55.7	1	11	11	38	1.95895e+09	18.419
UniProtKB:Q7Z406	Myosin-14 OS=Homo sapiens GN=MYH14 PE=1 SV=1	592.707	8.22	1	5	13	28	5.50693e+08	227.863
UniProtKB:Q9UL46	Proteasome activator complex subunit 2 OS=Homo sapiens GN=PSME2 PE=1 SV=4	592.596	44.77	1	8	8	20	2.46111e+08	27.3843
UniProtKB:Q9H3P7	Golgi resident protein GCP60 OS=Homo sapiens GN=ACBD3 PE=1 SV=4	591.859	34.28	1	11	11	19	1.65441e+08	60.556
UniProtKB:Q9UIA9	Exportin-7 OS=Homo sapiens GN=XPO7 PE=1 SV=3	591.51	19.96	1	15	15	27	4.0816e+08	123.828
UniProtKB:O75179	Ankyrin repeat domain-containing protein 17 OS=Homo sapiens GN=ANKRD17 PE=1 SV=3	590.571	7.76	1	7	15	23	8.48492e+07	274.088
UniProtKB:Q14684	Ribosomal RNA processing protein 1 homolog B OS=Homo sapiens GN=RRP1B PE=1 SV=3	590.54	28.36	1	16	16	28	2.53937e+08	84.3752
UniProtKB:Q86V81	THO complex subunit 4 OS=Homo sapiens GN=THOC4 PE=1 SV=3	588.847	34.63	1	7	7	18	6.01567e+08	26.8716
UniProtKB:Q9Y383	Putative RNA-binding protein Luc7-like 2 OS=Homo sapiens GN=LUC7L2 PE=1 SV=2	588.704	39.8	1	7	13	34	8.60452e+08	46.4856
UniProtKB:Q15293	Reticulocalbin-1 OS=Homo sapiens GN=RCN1 PE=1 SV=1	585.989	41.09	1	8	8	19	8.60329e+08	38.8662
UniProtKB:O60749	Sorting nexin-2 OS=Homo sapiens GN=SNX2 PE=1 SV=2	585.894	31.6	1	12	14	27	3.59533e+08	58.4347
UniProtKB:Q9H0U4	Ras-related protein Rab-1B OS=Homo sapiens GN=RAB1B PE=1 SV=1	584.642	57.21	1	2	10	22	5.66263e+08	22.1572
UniProtKB:Q99471	Prefoldin subunit 5 OS=Homo sapiens GN=PFDN5 PE=1 SV=2	584.477	64.29	1	9	9	23	3.53033e+08	17.317
UniProtKB:P10412	Histone H1.4 OS=Homo sapiens GN=HIST1H1E PE=1 SV=2	581.539	25.57	1	2	8	22	4.73492e+09	21.852
UniProtKB:P55735	Protein SEC13 homolog OS=Homo sapiens GN=SEC13 PE=1 SV=3	580.941	36.34	1	7	7	14	669146270	35.5181
UniProtKB:P62820	Ras-related protein Rab-1A OS=Homo sapiens GN=RAB1A PE=1 SV=3	579.5	59.51	1	4	10	23	5.66263e+08	22.6634
UniProtKB:Q9UBC2	Epidermal growth factor receptor substrate 15-like 1 OS=Homo sapiens GN=EPS15L1 PE=1 SV=1	578.905	18.52	1	12	12	19	1.38927e+08	94.197
UniProtKB:P33240	Cleavage stimulation factor subunit 2 OS=Homo sapiens GN=CSTF2 PE=1 SV=1	578.038	24.44	1	6	10	17	4.68123e+08	60.9205
UniProtKB:O15511	Actin-related protein 2/3 complex subunit 5 OS=Homo sapiens GN=ARPC5 PE=1 SV=3	575.461	52.32	1	6	6	14	2.435e+08	16.3103
UniProtKB:Q03252	Lamin-B2 OS=Homo sapiens GN=LMNB2 PE=1 SV=3	575.134	39.67	1	21	23	55	7.23957e+08	67.6475
UniProtKB:Q8IY67	Ribonucleoprotein PTB-binding 1 OS=Homo sapiens GN=RAVER1 PE=1 SV=1	574.779	18.81	1	6	6	17	2.70734e+08	63.8372
UniProtKB:P49591	Seryl-tRNA synthetase, cytoplasmic OS=Homo sapiens GN=SARS PE=1 SV=3	573.53	34.05	1	13	13	35	7.16598e+08	58.7401
UniProtKB:P51149	Ras-related protein Rab-7a OS=Homo sapiens GN=RAB7A PE=1 SV=1	573.461	67.15	1	10	11	23	3.52205e+08	23.4748
UniProtKB:P62269	40S ribosomal protein S18 OS=Homo sapiens GN=RPS18 PE=1 SV=3	573.237	52.63	1	11	11	36	2.28798e+09	17.7079
UniProtKB:Q9UKY7	Protein CDV3 homolog OS=Homo sapiens GN=CDV3 PE=1 SV=1	572.754	67.05	1	9	9	20	4.38529e+08	27.3184
UniProtKB:P62714	Serine/threonine-protein phosphatase 2A catalytic subunit beta isoform OS=Homo sapiens GN=PPP2CB PE=1 SV=1	570.122	43.37	1	1	11	20	7.87649e+08	35.5523
UniProtKB:O94973	AP-2 complex subunit alpha-2 OS=Homo sapiens GN=AP2A2 PE=1 SV=2	569.87	29.5	1	11	18	31	2.57556e+08	103.895
UniProtKB:P10768	S-formylglutathione hydrolase OS=Homo sapiens GN=ESD PE=1 SV=2	569.821	68.44	1	12	12	33	7.57059e+08	31.4425
UniProtKB:P07339	Cathepsin D OS=Homo sapiens GN=CTSD PE=1 SV=1	569.735	31.8	1	10	10	25	6.98674e+08	44.5236
UniProtKB:Q7L1Q6	Basic leucine zipper and W2 domain-containing protein 1 OS=Homo sapiens GN=BZW1 PE=1 SV=1	569.611	28.88	1	2	12	30	3.78842e+08	48.0127
UniProtKB:Q9H307	Pinin OS=Homo sapiens GN=PNN PE=1 SV=4	568.915	28.45	1	16	16	36	4.62338e+08	81.565
UniProtKB:Q9Y536	Peptidylprolyl cis-trans isomerase A-like 4A/B/C OS=Homo sapiens GN=PPIAL4A PE=1 SV=1	568.047	12.8	1	0	2	22	1.52947e+10	18.1702
UniProtKB:P28070	Proteasome subunit beta type-4 OS=Homo sapiens GN=PSMB4 PE=1 SV=4	567.061	37.88	1	6	6	18	5.48395e+08	29.1855
UniProtKB:P48739	Phosphatidylinositol transfer protein beta isoform OS=Homo sapiens GN=PITPNB PE=1 SV=2	566.964	36.53	1	6	7	22	3.30769e+08	31.5199
UniProtKB:P52732	Kinesin-like protein KIF11 OS=Homo sapiens GN=KIF11 PE=1 SV=2	566.946	18.47	1	15	15	25	1.58888e+08	119.085
UniProtKB:P40939	Trifunctional enzyme subunit alpha, mitochondrial OS=Homo sapiens GN=HADHA PE=1 SV=2	566.893	17.56	1	9	9	15	1.1095e+08	82.9469
UniProtKB:Q9UKX7	Nuclear pore complex protein Nup50 OS=Homo sapiens GN=NUP50 PE=1 SV=2	566.465	22.86	1	7	7	17	2.32944e+08	50.1132
UniProtKB:P46379	Large proline-rich protein BAT3 OS=Homo sapiens GN=BAT3 PE=1 SV=2	565.535	21.38	1	17	17	31	4.19321e+08	119.334
UniProtKB:Q15056	Eukaryotic translation initiation factor 4H OS=Homo sapiens GN=EIF4H PE=1 SV=5	565.097	40.32	1	9	9	22	1.82304e+09	27.3684
UniProtKB:Q13492	Phosphatidylinositol-binding clathrin assembly protein OS=Homo sapiens GN=PICALM PE=1 SV=2	564.677	24.54	1	8	9	19	1.78548e+08	70.71
UniProtKB:Q13547	Histone deacetylase 1 OS=Homo sapiens GN=HDAC1 PE=1 SV=1	564.149	30.08	1	6	9	23	9.90799e+08	55.0677
UniProtKB:Q14444	Caprin-1 OS=Homo sapiens GN=CAPRIN1 PE=1 SV=2	563.948	21.44	1	11	11	33	9.6984e+08	78.318
UniProtKB:P62879	Guanine nucleotide-binding protein G(I)/G(S)/G(T) subunit beta-2 OS=Homo sapiens GN=GNB2 PE=1 SV=3	561.758	34.71	1	3	8	17	5.5526e+08	37.3071
UniProtKB:P49189	4-trimethylaminobutyraldehyde dehydrogenase OS=Homo sapiens GN=ALDH9A1 PE=1 SV=3	561.244	27.94	1	11	11	23	7.37171e+08	53.767
UniProtKB:P21108	Ribose-phosphate pyrophosphokinase 3 OS=Homo sapiens GN=PRPS1L1 PE=1 SV=2	561.24	27.04	1	0	7	21	1.19577e+09	34.817
UniProtKB:P62304	Small nuclear ribonucleoprotein E OS=Homo sapiens GN=SNRPE PE=1 SV=1	558.29	52.17	1	1	3	16	1.44046e+09	10.7966
UniProtKB:P15121	Aldose reductase OS=Homo sapiens GN=AKR1B1 PE=1 SV=3	557.651	53.48	1	13	14	49	1072960674	35.8305
UniProtKB:Q9Y450	HBS1-like protein OS=Homo sapiens GN=HBS1L PE=1 SV=1	557.348	22.22	1	10	10	21	1.80677e+08	75.4256
UniProtKB:Q9NQW7	Xaa-Pro aminopeptidase 1 OS=Homo sapiens GN=XPNPEP1 PE=1 SV=3	556.99	23.11	1	12	12	21	1.29296e+08	69.8732
UniProtKB:P61201	COP9 signalosome complex subunit 2 OS=Homo sapiens GN=COPS2 PE=1 SV=1	556.987	27.31	1	9	9	16	4.23155e+08	51.5641
UniProtKB:Q9H6Z4	Ran-binding protein 3 OS=Homo sapiens GN=RANBP3 PE=1 SV=1	554.742	23.28	1	11	11	19	142092670	60.1732
UniProtKB:Q15427	Splicing factor 3B subunit 4 OS=Homo sapiens GN=SF3B4 PE=1 SV=1	553.149	19.34	1	5	5	18	4.54348e+08	44.3571
UniProtKB:P78344	Eukaryotic translation initiation factor 4 gamma 2 OS=Homo sapiens GN=EIF4G2 PE=1 SV=1	553.096	25.69	1	19	19	37	3.27034e+08	102.297
UniProtKB:P52294	Importin subunit alpha-1 OS=Homo sapiens GN=KPNA1 PE=1 SV=3	553.062	24.72	1	5	10	23	4.34627e+08	60.1836
UniProtKB:Q7Z4Q2	HEAT repeat-containing protein 3 OS=Homo sapiens GN=HEATR3 PE=1 SV=2	552.079	20	1	10	10	19	2.1857e+08	74.535
UniProtKB:Q12788	Transducin beta-like protein 3 OS=Homo sapiens GN=TBL3 PE=1 SV=2	551.361	26.49	1	15	15	22	1.95223e+08	88.9785
UniProtKB:P61221	ATP-binding cassette sub-family E member 1 OS=Homo sapiens GN=ABCE1 PE=1 SV=1	550.502	29.05	1	16	16	28	3.55957e+08	67.271
UniProtKB:O15372	Eukaryotic translation initiation factor 3 subunit H OS=Homo sapiens GN=EIF3H PE=1 SV=1	549.91	47.73	1	12	12	26	431648661	39.9051
UniProtKB:Q13126	S-methyl-5'-thioadenosine phosphorylase OS=Homo sapiens GN=MTAP PE=1 SV=2	549.46	62.9	1	14	14	24	7.26735e+08	31.2158
UniProtKB:Q9C0C9	Ubiquitin-conjugating enzyme E2 O OS=Homo sapiens GN=UBE2O PE=1 SV=3	548.273	18.27	1	15	15	24	2.47147e+08	141.205
UniProtKB:Q13442	28 kDa heat- and acid-stable phosphoprotein OS=Homo sapiens GN=PDAP1 PE=1 SV=1	547.663	36.46	1	6	6	18	4.87936e+08	20.6176
UniProtKB:P18621	60S ribosomal protein L17 OS=Homo sapiens GN=RPL17 PE=1 SV=3	546.041	42.93	1	8	8	37	1.9147e+09	21.3833
UniProtKB:P38606	V-type proton ATPase catalytic subunit A OS=Homo sapiens GN=ATP6V1A PE=1 SV=2	545.911	32.74	1	14	14	28	3.0389e+08	68.2605
UniProtKB:P05386	60S acidic ribosomal protein P1 OS=Homo sapiens GN=RPLP1 PE=1 SV=1	544.793	51.75	1	2	2	16	8510403340	11.5067
UniProtKB:Q14011	Cold-inducible RNA-binding protein OS=Homo sapiens GN=CIRBP PE=1 SV=1	544.421	33.14	1	4	4	13	5.10297e+08	18.6367
UniProtKB:O95793	Double-stranded RNA-binding protein Staufen homolog 1 OS=Homo sapiens GN=STAU1 PE=1 SV=2	544.065	26.52	1	9	9	17	171483575	63.1428
UniProtKB:Q15061	WD repeat-containing protein 43 OS=Homo sapiens GN=WDR43 PE=1 SV=3	544.004	27.33	1	12	12	24	2.72246e+08	74.8434
UniProtKB:P19367	Hexokinase-1 OS=Homo sapiens GN=HK1 PE=1 SV=3	543.355	17.23	1	10	12	22	1.39618e+08	102.42
UniProtKB:P36551	Coproporphyrinogen-III oxidase, mitochondrial OS=Homo sapiens GN=CPOX PE=1 SV=3	543.056	31.94	1	11	11	21	1.88153e+08	50.12
UniProtKB:Q8TAA3	Proteasome subunit alpha type-7-like OS=Homo sapiens GN=PSMA8 PE=1 SV=3	542.83	24.22	1	0	5	16	1.2419e+09	28.5121
UniProtKB:Q14690	Protein RRP5 homolog OS=Homo sapiens GN=PDCD11 PE=1 SV=3	541.599	14	1	21	21	31	1.20047e+08	208.57
UniProtKB:Q6Y7W6	PERQ amino acid-rich with GYF domain-containing protein 2 OS=Homo sapiens GN=GIGYF2 PE=1 SV=1	540.855	12.09	1	10	10	18	2.4838e+08	149.978
UniProtKB:Q92878	DNA repair protein RAD50 OS=Homo sapiens GN=RAD50 PE=1 SV=1	540.377	13.8	1	15	15	23	1.75065e+08	153.797
UniProtKB:Q13526	Peptidyl-prolyl cis-trans isomerase NIMA-interacting 1 OS=Homo sapiens GN=PIN1 PE=1 SV=1	538.619	61.96	1	6	7	19	5.26083e+08	18.232
UniProtKB:P21796	Voltage-dependent anion-selective channel protein 1 OS=Homo sapiens GN=VDAC1 PE=1 SV=2	537.889	42.4	1	9	9	22	6.20243e+08	30.7536
UniProtKB:Q96CX2	BTB/POZ domain-containing protein KCTD12 OS=Homo sapiens GN=KCTD12 PE=1 SV=1	537.774	50.77	1	12	14	35	6.23409e+08	35.6787
UniProtKB:P60033	CD81 antigen OS=Homo sapiens GN=CD81 PE=1 SV=1	537.475	25	1	3	3	8	735935940	25.7921
UniProtKB:P46109	Crk-like protein OS=Homo sapiens GN=CRKL PE=1 SV=1	536.981	40.92	1	8	8	22	4.66482e+08	33.7559
UniProtKB:Q9NQ29	Putative RNA-binding protein Luc7-like 1 OS=Homo sapiens GN=LUC7L PE=1 SV=1	536.765	34.5	1	6	12	26	7.13608e+08	43.7013
UniProtKB:Q8WUA2	Peptidyl-prolyl cis-trans isomerase-like 4 OS=Homo sapiens GN=PPIL4 PE=1 SV=1	536.32	20.12	1	8	8	17	1.72329e+08	57.1895
UniProtKB:P28482	Mitogen-activated protein kinase 1 OS=Homo sapiens GN=MAPK1 PE=1 SV=3	535.588	30.83	1	6	9	21	4.306e+08	41.3632
UniProtKB:O95861	3'(2'),5'-bisphosphate nucleotidase 1 OS=Homo sapiens GN=BPNT1 PE=1 SV=1	535.551	47.4	1	10	10	21	2.26783e+08	33.3712
UniProtKB:Q96C90	Protein phosphatase 1 regulatory subunit 14B OS=Homo sapiens GN=PPP1R14B PE=1 SV=3	535.117	57.82	1	4	4	19	1.37634e+09	15.901
UniProtKB:P61160	Actin-related protein 2 OS=Homo sapiens GN=ACTR2 PE=1 SV=1	535.08	29.7	1	10	10	26	518557483	44.7322
UniProtKB:P67936	Tropomyosin alpha-4 chain OS=Homo sapiens GN=TPM4 PE=1 SV=3	533.078	45.56	1	5	11	24	1.20034e+09	28.5045
UniProtKB:P46783	40S ribosomal protein S10 OS=Homo sapiens GN=RPS10 PE=1 SV=1	533.038	42.42	1	3	7	38	1.94664e+09	18.8859
UniProtKB:Q06323	Proteasome activator complex subunit 1 OS=Homo sapiens GN=PSME1 PE=1 SV=1	530.253	49.4	1	12	12	30	372278444	28.705
UniProtKB:Q12756	Kinesin-like protein KIF1A OS=Homo sapiens GN=KIF1A PE=2 SV=2	529.58	5.74	1	3	6	12	5.21719e+07	190.944
UniProtKB:A0AVT1	Ubiquitin-like modifier-activating enzyme 6 OS=Homo sapiens GN=UBA6 PE=1 SV=1	528.494	19.49	1	15	15	26	2.44976e+08	117.895
UniProtKB:O75347	Tubulin-specific chaperone A OS=Homo sapiens GN=TBCA PE=1 SV=3	528.144	55.56	1	12	12	34	1.36781e+09	12.8467
UniProtKB:P26373	60S ribosomal protein L13 OS=Homo sapiens GN=RPL13 PE=1 SV=4	526.799	32.7	1	8	8	28	3.46793e+09	24.2465
UniProtKB:Q8IWS0	PHD finger protein 6 OS=Homo sapiens GN=PHF6 PE=1 SV=1	526.408	30.14	1	8	8	22	3.40357e+08	41.264
UniProtKB:P46459	Vesicle-fusing ATPase OS=Homo sapiens GN=NSF PE=1 SV=3	526.197	24.46	1	17	17	30	3.81645e+08	82.5421
UniProtKB:P04080	Cystatin-B OS=Homo sapiens GN=CSTB PE=1 SV=2	524.3	70.41	1	4	4	20	1.62174e+09	11.1326
UniProtKB:P20810	Calpastatin OS=Homo sapiens GN=CAST PE=1 SV=4	524.263	22.46	1	9	9	15	1.6576e+08	76.5263
UniProtKB:Q9Y5L0	Transportin-3 OS=Homo sapiens GN=TNPO3 PE=1 SV=3	522.641	16.25	1	10	10	22	1.11911e+08	104.136
UniProtKB:CON_Q3SX09	(Bos taurus) similar to HBG protein	522.623	42.79	1	4	7	12	142459931	22.0466
UniProtKB:P61011	Signal recognition particle 54 kDa protein OS=Homo sapiens GN=SRP54 PE=1 SV=1	521.357	33.73	1	12	12	21	3.87989e+08	55.6683
UniProtKB:Q9UI26	Importin-11 OS=Homo sapiens GN=IPO11 PE=1 SV=1	518.23	15.38	1	11	11	22	1.73857e+08	112.463
UniProtKB:Q13564	NEDD8-activating enzyme E1 regulatory subunit OS=Homo sapiens GN=NAE1 PE=1 SV=1	517.639	24.34	1	9	9	17	2.52168e+08	60.2086
UniProtKB:P11177	Pyruvate dehydrogenase E1 component subunit beta, mitochondrial OS=Homo sapiens GN=PDHB PE=1 SV=3	517.619	33.98	1	9	9	21	3.61666e+08	39.208
UniProtKB:Q9NTJ3	Structural maintenance of chromosomes protein 4 OS=Homo sapiens GN=SMC4 PE=1 SV=2	517.308	15.14	1	16	16	24	1.75636e+08	147.091
UniProtKB:A6NK07	Eukaryotic translation initiation factor 2 subunit 2-like protein OS=Homo sapiens PE=1 SV=1	514.328	23.55	1	0	8	19	3.04797e+08	37.7631
UniProtKB:Q15758	Neutral amino acid transporter B(0) OS=Homo sapiens GN=SLC1A5 PE=1 SV=2	513.201	16.45	1	6	6	18	3.07551e+08	56.5623
UniProtKB:Q14683	Structural maintenance of chromosomes protein 1A OS=Homo sapiens GN=SMC1A PE=1 SV=2	512.687	13.79	1	13	13	24	1.60706e+08	143.144
UniProtKB:Q16181	Septin-7 OS=Homo sapiens GN=SEPT7 PE=1 SV=2	512.289	29.52	1	11	11	22	547597661	50.648
UniProtKB:P54578	Ubiquitin carboxyl-terminal hydrolase 14 OS=Homo sapiens GN=USP14 PE=1 SV=3	511.947	37.65	1	14	14	25	2.50261e+08	56.033
UniProtKB:P53992	Protein transport protein Sec24C OS=Homo sapiens GN=SEC24C PE=1 SV=3	511.87	13.16	1	12	12	25	1.33849e+08	118.249
UniProtKB:Q9UHD8	Septin-9 OS=Homo sapiens GN=SEPT9 PE=1 SV=2	511.671	27.65	1	10	10	19	1.47953e+08	65.3608
UniProtKB:Q92769	Histone deacetylase 2 OS=Homo sapiens GN=HDAC2 PE=1 SV=2	511.24	33.61	1	8	11	27	9.50651e+08	55.3288
UniProtKB:O75400	Pre-mRNA-processing factor 40 homolog A OS=Homo sapiens GN=PRPF40A PE=1 SV=2	511.174	15.88	1	12	13	26	4.11902e+08	108.737
UniProtKB:P37198	Nuclear pore glycoprotein p62 OS=Homo sapiens GN=NUP62 PE=1 SV=3	510.876	18.58	1	6	6	20	4.98369e+08	53.2225
UniProtKB:Q9UBQ7	Glyoxylate reductase/hydroxypyruvate reductase OS=Homo sapiens GN=GRHPR PE=1 SV=1	510.21	26.22	1	5	5	10	2.75868e+08	35.6457
UniProtKB:P20618	Proteasome subunit beta type-1 OS=Homo sapiens GN=PSMB1 PE=1 SV=2	510.008	48.96	1	10	10	22	8.78395e+08	26.4724
UniProtKB:Q9NRF9	DNA polymerase epsilon subunit 3 OS=Homo sapiens GN=POLE3 PE=1 SV=1	509.94	48.3	1	4	4	10	3.13197e+08	16.8493
UniProtKB:Q6FI81	Anamorsin OS=Homo sapiens GN=CIAPIN1 PE=1 SV=2	508.994	39.74	1	11	11	22	3.77064e+08	33.5611
UniProtKB:Q9Y6A5	Transforming acidic coiled-coil-containing protein 3 OS=Homo sapiens GN=TACC3 PE=1 SV=1	507.955	21.6	1	12	12	23	1.21937e+08	90.3038
UniProtKB:Q96FJ2	Dynein light chain 2, cytoplasmic OS=Homo sapiens GN=DYNLL2 PE=1 SV=1	507.945	58.43	1	2	5	17	1.03402e+09	10.3431
UniProtKB:Q9BZE4	Nucleolar GTP-binding protein 1 OS=Homo sapiens GN=GTPBP4 PE=1 SV=3	507.514	22.87	1	11	11	24	2.113e+08	73.9178
UniProtKB:Q9NUU7	ATP-dependent RNA helicase DDX19A OS=Homo sapiens GN=DDX19A PE=1 SV=1	507.16	32.43	1	2	13	21	3.15951e+08	53.9408
UniProtKB:P35659	Protein DEK OS=Homo sapiens GN=DEK PE=1 SV=1	507.158	32.53	1	13	13	26	4.32438e+08	42.6479
UniProtKB:Q9UGV6	Putative high mobility group protein 1-like 10 OS=Homo sapiens GN=HMGB1L10 PE=5 SV=1	505.498	24.64	1	0	8	31	2.87827e+09	24.203
UniProtKB:P19784	Casein kinase II subunit alpha' OS=Homo sapiens GN=CSNK2A2 PE=1 SV=1	504.097	28.57	1	7	7	15	1.09113e+08	41.1871
UniProtKB:O00567	Nucleolar protein 56 OS=Homo sapiens GN=NOP56 PE=1 SV=4	503.842	25.59	1	11	11	19	1.50035e+08	66.0087
UniProtKB:P62306	Small nuclear ribonucleoprotein F OS=Homo sapiens GN=SNRPF PE=1 SV=1	503.581	55.81	1	4	4	14	1.23971e+09	9.71878
UniProtKB:P35241	Radixin OS=Homo sapiens GN=RDX PE=1 SV=1	503.201	34.65	1	11	23	42	1.02931e+09	68.5214
UniProtKB:Q9Y5K5	Ubiquitin carboxyl-terminal hydrolase isozyme L5 OS=Homo sapiens GN=UCHL5 PE=1 SV=3	503.07	52.58	1	13	13	23	3.35279e+08	37.583
UniProtKB:P62266	40S ribosomal protein S23 OS=Homo sapiens GN=RPS23 PE=1 SV=3	502.12	48.95	1	7	7	19	9.68609e+08	15.7977
UniProtKB:Q9BPX3	Condensin complex subunit 3 OS=Homo sapiens GN=NCAPG PE=1 SV=1	501.319	20.39	1	15	15	23	3.88005e+08	114.262
UniProtKB:Q9NQT5	Exosome complex exonuclease RRP40 OS=Homo sapiens GN=EXOSC3 PE=1 SV=3	500.413	29.82	1	5	5	11	2.97885e+08	29.5534
UniProtKB:Q8N1G4	Leucine-rich repeat-containing protein 47 OS=Homo sapiens GN=LRRC47 PE=1 SV=1	500.118	27.1	1	9	9	17	1.59402e+08	63.4337
UniProtKB:P46087	Putative ribosomal RNA methyltransferase NOP2 OS=Homo sapiens GN=NOP2 PE=1 SV=2	499.629	24.26	1	17	17	30	2.93123e+08	89.2471
UniProtKB:P30048	Thioredoxin-dependent peroxide reductase, mitochondrial OS=Homo sapiens GN=PRDX3 PE=1 SV=3	499.232	40.23	1	7	7	22	1.50205e+09	27.6752
UniProtKB:Q15008	26S proteasome non-ATPase regulatory subunit 6 OS=Homo sapiens GN=PSMD6 PE=1 SV=1	499.003	37.53	1	15	15	36	5.24028e+08	45.5023
UniProtKB:O75153	Protein KIAA0664 OS=Homo sapiens GN=KIAA0664 PE=1 SV=2	497.963	13.6	1	14	14	23	1.16539e+08	146.577
UniProtKB:Q99426	Tubulin-folding cofactor B OS=Homo sapiens GN=TBCB PE=1 SV=2	497.735	37.7	1	8	8	22	3.96538e+08	27.3085
UniProtKB:P16402	Histone H1.3 OS=Homo sapiens GN=HIST1H1D PE=1 SV=2	497.386	23.08	1	1	7	17	4.73492e+09	22.3363
UniProtKB:O14737	Programmed cell death protein 5 OS=Homo sapiens GN=PDCD5 PE=1 SV=3	496.617	56.8	1	8	8	24	1703235303	14.2763
UniProtKB:P35250	Replication factor C subunit 2 OS=Homo sapiens GN=RFC2 PE=1 SV=3	496.213	29.66	1	8	8	17	2.43682e+08	39.1321
UniProtKB:Q00169	Phosphatidylinositol transfer protein alpha isoform OS=Homo sapiens GN=PITPNA PE=1 SV=2	496.07	27.41	1	4	5	9	1.3395e+08	31.786
UniProtKB:P35573	Glycogen debranching enzyme OS=Homo sapiens GN=AGL PE=1 SV=3	495.997	9.73	1	11	11	18	3.0843e+08	174.652
UniProtKB:P62899	60S ribosomal protein L31 OS=Homo sapiens GN=RPL31 PE=1 SV=1	495.961	39.2	1	5	5	17	2.96313e+09	14.4539
UniProtKB:Q07666	KH domain-containing, RNA-binding, signal transduction-associated protein 1 OS=Homo sapiens GN=KHDRBS1 PE=1 SV=1	494.529	16.03	1	6	7	20	1.33597e+09	48.1972
UniProtKB:Q14141	Septin-6 OS=Homo sapiens GN=SEPT6 PE=1 SV=4	494.288	17.51	1	3	8	22	4.75508e+08	49.6853
UniProtKB:Q01844	RNA-binding protein EWS OS=Homo sapiens GN=EWSR1 PE=1 SV=1	493.803	9.3	1	4	4	16	7.32414e+08	68.4357
UniProtKB:O00507	Probable ubiquitin carboxyl-terminal hydrolase FAF-Y OS=Homo sapiens GN=USP9Y PE=1 SV=2	491.605	6.81	1	1	15	24	1.49011e+08	290.891
UniProtKB:O43776	Asparaginyl-tRNA synthetase, cytoplasmic OS=Homo sapiens GN=NARS PE=1 SV=1	491.24	30.29	1	14	14	24	4.21756e+08	62.9025
UniProtKB:Q9UM54	Myosin-VI OS=Homo sapiens GN=MYO6 PE=1 SV=4	491.159	13.06	1	11	11	17	5.38664e+07	149.596
UniProtKB:Q13098	COP9 signalosome complex subunit 1 OS=Homo sapiens GN=GPS1 PE=1 SV=4	490.593	32.18	1	12	12	28	2.67887e+08	55.5012
UniProtKB:O14654	Insulin receptor substrate 4 OS=Homo sapiens GN=IRS4 PE=1 SV=1	490.531	11.38	1	10	10	21	2.48285e+08	133.685
UniProtKB:Q15813	Tubulin-specific chaperone E OS=Homo sapiens GN=TBCE PE=1 SV=1	490.2	34.35	1	12	12	19	1.5472e+08	59.309
UniProtKB:Q9UK76	Hematological and neurological expressed 1 protein OS=Homo sapiens GN=HN1 PE=1 SV=3	489.975	74.68	1	5	5	17	1.16884e+09	16.0049
UniProtKB:P43034	Platelet-activating factor acetylhydrolase IB subunit alpha OS=Homo sapiens GN=PAFAH1B1 PE=1 SV=2	489.57	30.73	1	10	10	27	2.80352e+08	46.6082
UniProtKB:P09012	U1 small nuclear ribonucleoprotein A OS=Homo sapiens GN=SNRPA PE=1 SV=3	489.495	29.08	1	5	7	21	9.49668e+08	31.2592
UniProtKB:Q9H9A5	CCR4-NOT transcription complex subunit 10 OS=Homo sapiens GN=CNOT10 PE=1 SV=1	487.217	7.93	1	4	4	8	4.40337e+07	82.2575
UniProtKB:Q13617	Cullin-2 OS=Homo sapiens GN=CUL2 PE=1 SV=2	486.98	18.66	1	10	10	18	1.68613e+08	86.9268
UniProtKB:A6NEC2	Puromycin-sensitive aminopeptidase-like protein OS=Homo sapiens GN=NPEPPSL1 PE=2 SV=3	486.465	23.43	1	0	10	19	5.5476e+08	53.713
UniProtKB:Q92804	TATA-binding protein-associated factor 2N OS=Homo sapiens GN=TAF15 PE=1 SV=1	485.523	13.51	1	3	5	16	1.76521e+09	61.7931
UniProtKB:P25787	Proteasome subunit alpha type-2 OS=Homo sapiens GN=PSMA2 PE=1 SV=2	484.943	35.47	1	5	5	15	4.3103e+08	25.8823
UniProtKB:O43684	Mitotic checkpoint protein BUB3 OS=Homo sapiens GN=BUB3 PE=1 SV=1	484.917	27.13	1	8	8	23	5.77478e+08	37.1312
UniProtKB:Q9Y2L1	Exosome complex exonuclease RRP44 OS=Homo sapiens GN=DIS3 PE=1 SV=2	484.755	15.55	1	9	9	13	2.44697e+08	108.934
UniProtKB:P11216	Glycogen phosphorylase, brain form OS=Homo sapiens GN=PYGB PE=1 SV=5	484.033	18.98	1	13	15	22	3.14688e+08	96.6345
UniProtKB:P33992	DNA replication licensing factor MCM5 OS=Homo sapiens GN=MCM5 PE=1 SV=5	483.894	31.61	1	18	18	30	4.09023e+08	82.2332
UniProtKB:P62750	60S ribosomal protein L23a OS=Homo sapiens GN=RPL23A PE=1 SV=1	479.434	47.44	1	9	9	35	2.51564e+09	17.6841
UniProtKB:P78347	General transcription factor II-I OS=Homo sapiens GN=GTF2I PE=1 SV=2	479.329	24.65	1	19	21	40	3.16783e+08	112.346
UniProtKB:Q68DN6	RANBP2-like and GRIP domain-containing protein 1/2 OS=Homo sapiens GN=RGPD1 PE=1 SV=2	479.278	7.27	1	0	11	17	151132142	196.514
UniProtKB:Q6IBS0	Twinfilin-2 OS=Homo sapiens GN=TWF2 PE=1 SV=2	479.23	32.66	1	8	8	21	3.00909e+08	39.5233
UniProtKB:Q9NY27	Serine/threonine-protein phosphatase 4 regulatory subunit 2 OS=Homo sapiens GN=PPP4R2 PE=1 SV=3	479.195	34.05	1	8	8	16	1.1342e+08	46.8689
UniProtKB:Q99536	Synaptic vesicle membrane protein VAT-1 homolog OS=Homo sapiens GN=VAT1 PE=1 SV=2	479.079	37.15	1	9	9	22	3.85585e+08	41.8934
UniProtKB:Q9NVA2	Septin-11 OS=Homo sapiens GN=SEPT11 PE=1 SV=3	478.058	35.43	1	7	13	28	6.30357e+08	49.3672
UniProtKB:Q9BQ04	RNA-binding protein 4B OS=Homo sapiens GN=RBM4B PE=1 SV=1	477.749	37.88	1	1	14	25	4.32206e+08	40.1244
UniProtKB:Q9HCE1	Putative helicase MOV-10 OS=Homo sapiens GN=MOV10 PE=1 SV=2	477.73	10.07	1	7	7	15	1.20054e+08	113.599
UniProtKB:P84098	60S ribosomal protein L19 OS=Homo sapiens GN=RPL19 PE=1 SV=1	477.644	27.04	1	7	7	16	2.26546e+09	23.4512
UniProtKB:Q5JTH9	RRP12-like protein OS=Homo sapiens GN=RRP12 PE=1 SV=2	476.63	17.19	1	15	15	21	1.08233e+08	143.611
UniProtKB:Q99666	RANBP2-like and GRIP domain-containing protein 5/6 OS=Homo sapiens GN=RGPD5 PE=1 SV=3	475.109	6.86	1	0	10	18	1.51423e+08	198.8
UniProtKB:O14715	RANBP2-like and GRIP domain-containing protein 8 OS=Homo sapiens GN=RGPD8 PE=1 SV=2	475.109	6.86	1	0	10	18	1.51423e+08	198.869
UniProtKB:Q99614	Tetratricopeptide repeat protein 1 OS=Homo sapiens GN=TTC1 PE=1 SV=1	475.025	42.12	1	9	9	20	2.12043e+08	33.5052
UniProtKB:Q9NZT2	Opioid growth factor receptor OS=Homo sapiens GN=OGFR PE=1 SV=3	473.789	21.42	1	8	8	17	9.02912e+07	73.2801
UniProtKB:Q9Y570	Protein phosphatase methylesterase 1 OS=Homo sapiens GN=PPME1 PE=1 SV=3	473.517	20.73	1	7	7	14	1.09885e+08	42.2882
UniProtKB:P49643	DNA primase large subunit OS=Homo sapiens GN=PRIM2 PE=1 SV=2	473.447	15.52	1	6	6	12	1.95084e+08	58.769
UniProtKB:Q9NQG5	Regulation of nuclear pre-mRNA domain-containing protein 1B OS=Homo sapiens GN=RPRD1B PE=1 SV=1	473.292	29.75	1	6	7	17	3.0729e+08	36.8772
UniProtKB:P68402	Platelet-activating factor acetylhydrolase IB subunit beta OS=Homo sapiens GN=PAFAH1B2 PE=1 SV=1	473.001	26.2	1	4	4	14	4.95161e+08	25.5531
UniProtKB:O43504	Hepatitis B virus X-interacting protein OS=Homo sapiens GN=HBXIP PE=1 SV=1	472.483	96.7	1	5	5	11	6.1313e+08	9.60772
UniProtKB:Q9P289	Serine/threonine-protein kinase MST4 OS=Homo sapiens GN=MST4 PE=1 SV=2	471.399	34.86	1	6	12	20	193642974	46.4996
UniProtKB:P20073	Annexin A7 OS=Homo sapiens GN=ANXA7 PE=1 SV=3	470.445	19.47	1	8	8	14	197550167	52.7058
UniProtKB:P49720	Proteasome subunit beta type-3 OS=Homo sapiens GN=PSMB3 PE=1 SV=2	470.395	40	1	8	8	21	5.16095e+08	22.9335
UniProtKB:Q96HC4	PDZ and LIM domain protein 5 OS=Homo sapiens GN=PDLIM5 PE=1 SV=4	468.81	29.53	1	15	15	29	2.61453e+08	63.9615
UniProtKB:P62910	60S ribosomal protein L32 OS=Homo sapiens GN=RPL32 PE=1 SV=2	467.796	45.19	1	7	7	29	2.18226e+09	15.8498
UniProtKB:P24844	Myosin regulatory light polypeptide 9 OS=Homo sapiens GN=MYL9 PE=1 SV=4	467.4	38.37	1	0	6	21	812821537	19.8144
UniProtKB:P07205	Phosphoglycerate kinase 2 OS=Homo sapiens GN=PGK2 PE=1 SV=3	466.841	13.19	1	0	5	25	3.36697e+09	44.7673
UniProtKB:P28331	NADH-ubiquinone oxidoreductase 75 kDa subunit, mitochondrial OS=Homo sapiens GN=NDUFS1 PE=1 SV=3	466.532	22.15	1	9	9	13	1.25599e+08	79.4165
UniProtKB:Q96HE7	ERO1-like protein alpha OS=Homo sapiens GN=ERO1L PE=1 SV=2	466.257	20.51	1	7	7	17	206420088	54.3581
UniProtKB:O75531	Barrier-to-autointegration factor OS=Homo sapiens GN=BANF1 PE=1 SV=1	465.823	53.93	1	4	4	25	457351680	10.052
UniProtKB:P43487	Ran-specific GTPase-activating protein OS=Homo sapiens GN=RANBP1 PE=1 SV=1	465.138	59.7	1	7	8	28	5268443261	23.2956
UniProtKB:P62244	40S ribosomal protein S15a OS=Homo sapiens GN=RPS15A PE=1 SV=2	465.03	64.62	1	8	8	39	1.51297e+09	14.83
UniProtKB:Q9UNH7	Sorting nexin-6 OS=Homo sapiens GN=SNX6 PE=1 SV=1	464.752	23.65	1	8	9	20	2.67731e+08	46.6198
UniProtKB:Q9H0L4	Cleavage stimulation factor subunit 2 tau variant OS=Homo sapiens GN=CSTF2T PE=1 SV=1	464.495	12.99	1	2	6	9	299338597	64.3955
UniProtKB:Q01081	Splicing factor U2AF 35 kDa subunit OS=Homo sapiens GN=U2AF1 PE=1 SV=3	464.25	23.33	1	3	5	15	8.41944e+08	27.8545
UniProtKB:P60981	Destrin OS=Homo sapiens GN=DSTN PE=1 SV=3	463.933	36.36	1	5	5	17	473719673	18.4935
UniProtKB:Q16629	Serine/arginine-rich splicing factor 7 OS=Homo sapiens GN=SRSF7 PE=1 SV=1	463.492	20.59	1	4	5	18	2.78007e+09	27.35
UniProtKB:Q9H4A4	Aminopeptidase B OS=Homo sapiens GN=RNPEP PE=1 SV=2	462.822	26.62	1	12	12	21	600061039	72.5495
UniProtKB:Q13162	Peroxiredoxin-4 OS=Homo sapiens GN=PRDX4 PE=1 SV=1	461.447	63.1	1	10	12	28	2.54443e+09	30.5208
UniProtKB:Q7Z4H3	HD domain-containing protein 2 OS=Homo sapiens GN=HDDC2 PE=1 SV=1	460.916	52.94	1	7	7	19	2.95121e+08	23.3757
UniProtKB:Q9H444	Charged multivesicular body protein 4b OS=Homo sapiens GN=CHMP4B PE=1 SV=1	460.845	37.95	1	6	6	18	5.40645e+08	24.9346
UniProtKB:Q5QJE6	Deoxynucleotidyltransferase terminal-interacting protein 2 OS=Homo sapiens GN=DNTTIP2 PE=1 SV=2	460.553	20.24	1	10	10	15	119777082	84.4179
UniProtKB:O15514	DNA-directed RNA polymerase II subunit RPB4 OS=Homo sapiens GN=POLR2D PE=1 SV=1	459.444	67.61	1	6	6	11	8.13838e+07	16.3011
UniProtKB:Q9NXF1	Testis-expressed sequence 10 protein OS=Homo sapiens GN=TEX10 PE=1 SV=2	459.403	11.09	1	7	7	15	2.29741e+08	105.608
UniProtKB:Q14978	Nucleolar and coiled-body phosphoprotein 1 OS=Homo sapiens GN=NOLC1 PE=1 SV=2	458.884	20.6	1	12	12	27	6.94692e+08	73.5596
UniProtKB:P11172	Uridine 5'-monophosphate synthase OS=Homo sapiens GN=UMPS PE=1 SV=1	458.67	15.83	1	6	6	17	2.80077e+08	52.1886
UniProtKB:P62847	40S ribosomal protein S24 OS=Homo sapiens GN=RPS24 PE=1 SV=1	457.425	25.56	1	3	3	13	2.10224e+09	15.4134
UniProtKB:P52565	Rho GDP-dissociation inhibitor 1 OS=Homo sapiens GN=ARHGDIA PE=1 SV=3	456.665	41.67	1	6	6	24	2.06951e+09	23.1927
UniProtKB:P31153	S-adenosylmethionine synthase isoform type-2 OS=Homo sapiens GN=MAT2A PE=1 SV=1	455.652	29.62	1	9	9	16	1.03753e+09	43.6333
UniProtKB:Q8NCW5	Apolipoprotein A-I-binding protein OS=Homo sapiens GN=APOA1BP PE=1 SV=2	455.197	31.25	1	6	6	14	4.32332e+08	31.6542
UniProtKB:Q12792	Twinfilin-1 OS=Homo sapiens GN=TWF1 PE=1 SV=3	455	20.29	1	5	5	10	1.4932e+08	40.2577
UniProtKB:Q14151	Scaffold attachment factor B2 OS=Homo sapiens GN=SAFB2 PE=1 SV=1	454.808	21.41	1	7	15	25	7.27974e+08	107.408
UniProtKB:O15294	UDP-N-acetylglucosamine--peptide N-acetylglucosaminyltransferase 110 kDa subunit OS=Homo sapiens GN=OGT PE=1 SV=3	454.626	17.69	1	13	13	19	1.63367e+08	116.85
UniProtKB:P53041	Serine/threonine-protein phosphatase 5 OS=Homo sapiens GN=PPP5C PE=1 SV=1	452.79	28.66	1	10	10	20	3.33262e+08	56.8423
UniProtKB:Q9UHD1	Cysteine and histidine-rich domain-containing protein 1 OS=Homo sapiens GN=CHORDC1 PE=1 SV=2	451.96	49.4	1	11	11	23	6.88322e+08	37.4656
UniProtKB:P30044	Peroxiredoxin-5, mitochondrial OS=Homo sapiens GN=PRDX5 PE=1 SV=3	451.869	40.19	1	6	6	17	5.12918e+08	22.0125
UniProtKB:Q07065	Cytoskeleton-associated protein 4 OS=Homo sapiens GN=CKAP4 PE=1 SV=2	451.746	14.45	1	6	6	11	5.65583e+07	65.9827
UniProtKB:O75475	PC4 and SFRS1-interacting protein OS=Homo sapiens GN=PSIP1 PE=1 SV=1	450.797	15.66	1	6	6	13	1.40182e+08	60.0667
UniProtKB:Q5VTR2	E3 ubiquitin-protein ligase BRE1A OS=Homo sapiens GN=RNF20 PE=1 SV=2	450.369	15.18	1	11	12	22	1.58132e+08	113.592
UniProtKB:P23193	Transcription elongation factor A protein 1 OS=Homo sapiens GN=TCEA1 PE=1 SV=2	450.353	26.91	1	5	7	15	3.91816e+08	33.948
UniProtKB:P25786	Proteasome subunit alpha type-1 OS=Homo sapiens GN=PSMA1 PE=1 SV=1	448.671	54.75	1	12	12	26	8.83462e+08	29.5369
UniProtKB:O43847	Nardilysin OS=Homo sapiens GN=NRD1 PE=1 SV=2	448.591	11.13	1	11	11	22	1.35146e+08	131.488
UniProtKB:P61923	Coatomer subunit zeta-1 OS=Homo sapiens GN=COPZ1 PE=1 SV=1	448.417	27.12	1	5	5	13	8.46831e+08	20.1855
UniProtKB:P34897	Serine hydroxymethyltransferase, mitochondrial OS=Homo sapiens GN=SHMT2 PE=1 SV=3	447.927	18.45	1	5	6	12	2.48581e+08	55.9577
UniProtKB:Q9Y4W2	Protein LAS1 homolog OS=Homo sapiens GN=LAS1L PE=1 SV=2	447.363	22.89	1	12	12	16	1.30308e+08	83.0128
UniProtKB:Q9UBS4	DnaJ homolog subfamily B member 11 OS=Homo sapiens GN=DNAJB11 PE=1 SV=1	446.74	15.08	1	4	4	10	1.52467e+08	40.4886
UniProtKB:P35249	Replication factor C subunit 4 OS=Homo sapiens GN=RFC4 PE=1 SV=2	445.65	25.9	1	6	6	11	2.86817e+08	39.6569
UniProtKB:Q9BQ52	Zinc phosphodiesterase ELAC protein 2 OS=Homo sapiens GN=ELAC2 PE=1 SV=2	445.65	20.82	1	11	11	18	196609059	92.1602
UniProtKB:Q15102	Platelet-activating factor acetylhydrolase IB subunit gamma OS=Homo sapiens GN=PAFAH1B3 PE=1 SV=1	444.966	53.68	1	8	8	19	2.33113e+08	25.7182
UniProtKB:O76003	Glutaredoxin-3 OS=Homo sapiens GN=GLRX3 PE=1 SV=2	444.943	30.15	1	7	7	15	725953694	37.4082
UniProtKB:O95831	Apoptosis-inducing factor 1, mitochondrial OS=Homo sapiens GN=AIFM1 PE=1 SV=1	444.125	24.31	1	11	11	20	2.65934e+08	66.8589
UniProtKB:Q6IN85	Serine/threonine-protein phosphatase 4 regulatory subunit 3A OS=Homo sapiens GN=SMEK1 PE=1 SV=1	443.639	12.24	1	5	7	13	6.94617e+07	95.308
UniProtKB:P21399	Cytoplasmic aconitate hydratase OS=Homo sapiens GN=ACO1 PE=1 SV=3	443.627	16.99	1	10	10	19	1.33448e+08	98.3366
UniProtKB:Q9BUJ2	Heterogeneous nuclear ribonucleoprotein U-like protein 1 OS=Homo sapiens GN=HNRNPUL1 PE=1 SV=2	442.959	26.29	1	15	15	25	6.51795e+08	95.6793
UniProtKB:O75937	DnaJ homolog subfamily C member 8 OS=Homo sapiens GN=DNAJC8 PE=1 SV=2	442.956	35.97	1	9	9	22	8.29318e+08	29.8234
UniProtKB:Q13409	Cytoplasmic dynein 1 intermediate chain 2 OS=Homo sapiens GN=DYNC1I2 PE=1 SV=3	442.582	26.65	1	10	10	14	3.16696e+08	71.4121
UniProtKB:Q9H2U2	Inorganic pyrophosphatase 2, mitochondrial OS=Homo sapiens GN=PPA2 PE=1 SV=2	442.545	23.35	1	6	6	16	710046223	37.896
UniProtKB:Q5JSH3	WD repeat-containing protein 44 OS=Homo sapiens GN=WDR44 PE=1 SV=1	441.984	19.28	1	13	13	17	1.19309e+08	101.304
UniProtKB:Q6ZMR3	L-lactate dehydrogenase A-like 6A OS=Homo sapiens GN=LDHAL6A PE=2 SV=1	441.863	4.22	1	0	2	12	7135347702	36.4842
UniProtKB:Q04726	Transducin-like enhancer protein 3 OS=Homo sapiens GN=TLE3 PE=1 SV=2	441.854	12.95	1	4	9	20	2.06238e+08	83.3641
UniProtKB:P50995	Annexin A11 OS=Homo sapiens GN=ANXA11 PE=1 SV=1	441.118	20.2	1	8	8	18	3.13724e+08	54.3551
UniProtKB:Q6PKG0	La-related protein 1 OS=Homo sapiens GN=LARP1 PE=1 SV=2	440.801	12.59	1	10	10	20	1.50333e+08	123.434
UniProtKB:P53999	Activated RNA polymerase II transcriptional coactivator p15 OS=Homo sapiens GN=SUB1 PE=1 SV=3	440.039	47.24	1	6	6	16	1.54351e+09	14.3864
UniProtKB:O00193	Small acidic protein OS=Homo sapiens GN=SMAP PE=1 SV=1	439.667	26.78	1	5	5	14	5.28495e+08	20.3202
UniProtKB:P63162	Small nuclear ribonucleoprotein-associated protein N OS=Homo sapiens GN=SNRPN PE=1 SV=1	439.413	24.58	1	0	6	21	6.32794e+08	24.598
UniProtKB:P14678	Small nuclear ribonucleoprotein-associated proteins B and B' OS=Homo sapiens GN=SNRPB PE=1 SV=2	439.413	24.58	1	0	6	21	6.32794e+08	24.5937
UniProtKB:P21281	V-type proton ATPase subunit B, brain isoform OS=Homo sapiens GN=ATP6V1B2 PE=1 SV=3	439.362	40.9	1	8	13	19	3.03477e+08	56.4649
UniProtKB:Q9H6T3	RNA polymerase II-associated protein 3 OS=Homo sapiens GN=RPAP3 PE=1 SV=2	439.16	19.55	1	10	10	19	1.6432e+08	75.6719
UniProtKB:P34896	Serine hydroxymethyltransferase, cytosolic OS=Homo sapiens GN=SHMT1 PE=1 SV=1	439.15	23.19	1	7	8	15	1.29405e+08	53.049
UniProtKB:Q8N8S7	Protein enabled homolog OS=Homo sapiens GN=ENAH PE=1 SV=2	438.368	33.5	1	14	15	32	3.62775e+08	66.4699
UniProtKB:Q01085	Nucleolysin TIAR OS=Homo sapiens GN=TIAL1 PE=1 SV=1	438.314	24.8	1	6	8	14	3.48334e+08	41.5641
UniProtKB:Q13895	Bystin OS=Homo sapiens GN=BYSL PE=1 SV=3	438.309	26.77	1	9	9	19	2.44362e+08	49.57
UniProtKB:P15374	Ubiquitin carboxyl-terminal hydrolase isozyme L3 OS=Homo sapiens GN=UCHL3 PE=1 SV=1	438.22	40.43	1	7	7	15	498648971	26.166
UniProtKB:Q9UNF1	Melanoma-associated antigen D2 OS=Homo sapiens GN=MAGED2 PE=1 SV=2	436.583	30.2	1	9	11	20	1.95893e+08	64.9144
UniProtKB:O00425	Insulin-like growth factor 2 mRNA-binding protein 3 OS=Homo sapiens GN=IGF2BP3 PE=1 SV=2	436.287	18.13	1	7	8	14	4.05675e+08	63.6656
UniProtKB:P16949	Stathmin OS=Homo sapiens GN=STMN1 PE=1 SV=3	435.292	35.57	1	5	6	33	1.62081e+09	17.292
UniProtKB:Q9NPJ6	Mediator of RNA polymerase II transcription subunit 4 OS=Homo sapiens GN=MED4 PE=1 SV=1	435.057	27.04	1	5	5	9	1.34182e+08	29.7269
UniProtKB:P31040	Succinate dehydrogenase [ubiquinone] flavoprotein subunit, mitochondrial OS=Homo sapiens GN=SDHA PE=1 SV=2	435.02	13.25	1	7	7	13	1.18641e+08	72.6453
UniProtKB:P31947	14-3-3 protein sigma OS=Homo sapiens GN=SFN PE=1 SV=1	434.921	7.26	1	0	2	39	2.20331e+10	27.7567
UniProtKB:P35520	Cystathionine beta-synthase OS=Homo sapiens GN=CBS PE=1 SV=2	434.771	25.95	1	11	11	35	8.37077e+08	60.5482
UniProtKB:CON_P12763	(Bos taurus) Alpha-2-HS-glycoprotein precursor	434.595	22.56	1	5	8	21	982546968	38.3944
UniProtKB:Q9ULV4	Coronin-1C OS=Homo sapiens GN=CORO1C PE=1 SV=1	433.942	23.63	1	10	10	18	249998328	53.2151
UniProtKB:O15160	DNA-directed RNA polymerases I and III subunit RPAC1 OS=Homo sapiens GN=POLR1C PE=1 SV=1	433.825	29.48	1	7	7	13	169734426	39.225
UniProtKB:Q9Y5A9	YTH domain family protein 2 OS=Homo sapiens GN=YTHDF2 PE=1 SV=2	433.371	18.83	1	6	8	15	4.07043e+08	62.2957
UniProtKB:Q8NE71	ATP-binding cassette sub-family F member 1 OS=Homo sapiens GN=ABCF1 PE=1 SV=2	433.176	14.32	1	8	8	14	7.56953e+07	95.8665
UniProtKB:Q15007	Pre-mRNA-splicing regulator WTAP OS=Homo sapiens GN=WTAP PE=1 SV=2	433.065	20.71	1	6	6	10	7.02568e+07	44.2167
UniProtKB:Q8TEQ6	Gem-associated protein 5 OS=Homo sapiens GN=GEMIN5 PE=1 SV=3	432.67	11.87	1	13	13	22	1.0925e+08	168.483
UniProtKB:P14854	Cytochrome c oxidase subunit 6B1 OS=Homo sapiens GN=COX6B1 PE=1 SV=2	431.435	66.28	1	5	5	17	7.21567e+08	10.1857
UniProtKB:Q05519	Serine/arginine-rich splicing factor 11 OS=Homo sapiens GN=SRSF11 PE=1 SV=1	431.433	25.41	1	7	7	22	5.11489e+08	53.5102
UniProtKB:P61421	V-type proton ATPase subunit d 1 OS=Homo sapiens GN=ATP6V0D1 PE=1 SV=1	430.78	31.91	1	6	6	12	2.44899e+08	40.3032
UniProtKB:O43768	Alpha-endosulfine OS=Homo sapiens GN=ENSA PE=1 SV=1	430.583	47.93	1	4	5	16	5.1868e+08	13.3808
UniProtKB:Q8TAT6	Nuclear protein localization protein 4 homolog OS=Homo sapiens GN=NPLOC4 PE=1 SV=3	430.51	13.65	1	6	6	10	9.53807e+07	68.0769
UniProtKB:O60884	DnaJ homolog subfamily A member 2 OS=Homo sapiens GN=DNAJA2 PE=1 SV=1	429.173	34.22	1	8	8	16	2.71401e+08	45.7166
UniProtKB:Q10570	Cleavage and polyadenylation specificity factor subunit 1 OS=Homo sapiens GN=CPSF1 PE=1 SV=2	428.773	8.39	1	9	9	15	1.05187e+08	160.782
UniProtKB:P63172	Dynein light chain Tctex-type 1 OS=Homo sapiens GN=DYNLT1 PE=1 SV=1	427.98	51.33	1	3	3	10	1.23263e+08	12.444
UniProtKB:P49790	Nuclear pore complex protein Nup153 OS=Homo sapiens GN=NUP153 PE=1 SV=2	427.429	9.29	1	9	9	13	44917767	153.843
UniProtKB:Q8IWX8	Calcium homeostasis endoplasmic reticulum protein OS=Homo sapiens GN=CHERP PE=1 SV=3	427.258	10.26	1	7	7	15	2.866e+08	103.637
UniProtKB:P62249	40S ribosomal protein S16 OS=Homo sapiens GN=RPS16 PE=1 SV=2	426.713	45.21	1	8	8	24	2.46188e+09	16.435
UniProtKB:Q13595	Transformer-2 protein homolog alpha OS=Homo sapiens GN=TRA2A PE=1 SV=1	426.229	18.79	1	5	6	17	4.1518e+08	32.6691
UniProtKB:O00541	Pescadillo homolog OS=Homo sapiens GN=PES1 PE=1 SV=1	426.176	25.17	1	10	10	21	2.41451e+08	67.96
UniProtKB:O00442	RNA 3'-terminal phosphate cyclase OS=Homo sapiens GN=RTCD1 PE=1 SV=1	425.987	17.21	1	5	5	11	2.2131e+08	39.3114
UniProtKB:P27824	Calnexin OS=Homo sapiens GN=CANX PE=1 SV=2	425.638	22.8	1	10	10	19	4.15914e+08	67.5259
UniProtKB:Q15269	Periodic tryptophan protein 2 homolog OS=Homo sapiens GN=PWP2 PE=1 SV=2	425.598	10.77	1	5	5	11	2.51087e+08	102.387
UniProtKB:Q00577	Transcriptional activator protein Pur-alpha OS=Homo sapiens GN=PURA PE=1 SV=2	425.09	18.01	1	3	3	8	9.75111e+07	34.8894
UniProtKB:Q9BVI4	Nucleolar complex protein 4 homolog OS=Homo sapiens GN=NOC4L PE=1 SV=1	424.34	16.28	1	5	5	10	8.73748e+07	58.4307
UniProtKB:Q9NS69	Mitochondrial import receptor subunit TOM22 homolog OS=Homo sapiens GN=TOMM22 PE=1 SV=3	423.667	66.2	1	5	5	12	2.54871e+08	15.5118
UniProtKB:Q15417	Calponin-3 OS=Homo sapiens GN=CNN3 PE=1 SV=1	423.287	37.99	1	9	10	18	413590580	36.3908
UniProtKB:P54105	Methylosome subunit pICln OS=Homo sapiens GN=CLNS1A PE=1 SV=1	422.53	59.49	1	8	8	12	3.55145e+08	26.1989
UniProtKB:Q9UNX4	WD repeat-containing protein 3 OS=Homo sapiens GN=WDR3 PE=1 SV=1	422.268	13.15	1	9	9	13	1.04284e+08	106.032
UniProtKB:Q15020	Squamous cell carcinoma antigen recognized by T-cells 3 OS=Homo sapiens GN=SART3 PE=1 SV=1	421.531	18.28	1	11	12	18	165036950	109.865
UniProtKB:O60610	Protein diaphanous homolog 1 OS=Homo sapiens GN=DIAPH1 PE=1 SV=2	420.79	10.06	1	10	10	18	1.01302e+08	141.258
UniProtKB:Q13573	SNW domain-containing protein 1 OS=Homo sapiens GN=SNW1 PE=1 SV=1	419.998	26.68	1	10	10	14	205509597	61.4565
UniProtKB:Q96EP5	DAZ-associated protein 1 OS=Homo sapiens GN=DAZAP1 PE=1 SV=1	419.039	25.8	1	7	7	13	8.90803e+08	43.3561
UniProtKB:O43324	Eukaryotic translation elongation factor 1 epsilon-1 OS=Homo sapiens GN=EEF1E1 PE=1 SV=1	418.918	37.93	1	5	5	12	5.09153e+08	19.7983
UniProtKB:Q06124	Tyrosine-protein phosphatase non-receptor type 11 OS=Homo sapiens GN=PTPN11 PE=1 SV=2	417.405	28.81	1	13	13	20	1.11012e+08	68.3933
UniProtKB:Q9H3K6	BolA-like protein 2 OS=Homo sapiens GN=BOLA2 PE=1 SV=1	416.978	80.23	1	6	6	17	8.38412e+08	10.1102
UniProtKB:O60343	TBC1 domain family member 4 OS=Homo sapiens GN=TBC1D4 PE=1 SV=2	416.483	7.4	1	7	7	12	1.47149e+08	146.471
UniProtKB:O94813	Slit homolog 2 protein OS=Homo sapiens GN=SLIT2 PE=1 SV=1	415.418	6.28	1	6	6	9	1.23647e+08	169.759
UniProtKB:Q96F45	Zinc finger protein 503 OS=Homo sapiens GN=ZNF503 PE=1 SV=1	414.87	12.69	1	4	5	10	1.28178e+08	62.5158
UniProtKB:P54886	Delta-1-pyrroline-5-carboxylate synthase OS=Homo sapiens GN=ALDH18A1 PE=1 SV=2	414.84	21.38	1	14	14	24	184006397	87.2475
UniProtKB:Q12972	Nuclear inhibitor of protein phosphatase 1 OS=Homo sapiens GN=PPP1R8 PE=1 SV=2	414.715	39.89	1	8	8	13	4.67663e+08	38.4548
UniProtKB:Q05682	Caldesmon OS=Homo sapiens GN=CALD1 PE=1 SV=2	413.109	12.99	1	7	7	14	1.69118e+08	93.1945
UniProtKB:Q969G3	SWI/SNF-related matrix-associated actin-dependent regulator of chromatin subfamily E member 1 OS=Homo sapiens GN=SMARCE1 PE=1 SV=2	412.408	23.36	1	8	8	15	2.45978e+08	46.6206
UniProtKB:Q8NFI4	Putative protein FAM10A5 OS=Homo sapiens GN=FAM10A5 PE=5 SV=1	412.254	18.97	1	0	7	25	2.28331e+09	41.3513
UniProtKB:Q96P16	Regulation of nuclear pre-mRNA domain-containing protein 1A OS=Homo sapiens GN=RPRD1A PE=1 SV=1	412.244	25.96	1	5	6	14	3.39396e+08	35.6976
UniProtKB:Q9H0D6	5'-3' exoribonuclease 2 OS=Homo sapiens GN=XRN2 PE=1 SV=1	411.812	26.95	1	16	16	22	4.00821e+08	108.513
UniProtKB:Q9UJC3	Protein Hook homolog 1 OS=Homo sapiens GN=HOOK1 PE=1 SV=2	410.96	12.09	1	6	6	8	5.44539e+07	84.5948
UniProtKB:P58546	Myotrophin OS=Homo sapiens GN=MTPN PE=1 SV=2	410.369	68.64	1	6	6	23	7.84704e+08	12.8866
UniProtKB:Q9BRX5	DNA replication complex GINS protein PSF3 OS=Homo sapiens GN=GINS3 PE=1 SV=1	410.336	42.13	1	6	6	12	1.40096e+08	24.5192
UniProtKB:Q14126	Desmoglein-2 OS=Homo sapiens GN=DSG2 PE=1 SV=2	410.271	14.31	1	10	10	13	1.17113e+08	122.218
UniProtKB:Q06265	Exosome complex exonuclease RRP45 OS=Homo sapiens GN=EXOSC9 PE=1 SV=3	409.88	17.54	1	6	6	10	176452013	48.9181
UniProtKB:Q13616	Cullin-1 OS=Homo sapiens GN=CUL1 PE=1 SV=2	409.474	18.94	1	11	11	19	9.92933e+07	89.622
UniProtKB:P52948	Nuclear pore complex protein Nup98-Nup96 OS=Homo sapiens GN=NUP98 PE=1 SV=4	409.229	10.18	1	16	16	19	1.19429e+08	197.457
UniProtKB:Q9Y696	Chloride intracellular channel protein 4 OS=Homo sapiens GN=CLIC4 PE=1 SV=4	408.991	54.94	1	10	10	16	340081660	28.7537
UniProtKB:O95721	Synaptosomal-associated protein 29 OS=Homo sapiens GN=SNAP29 PE=1 SV=1	408.62	41.86	1	8	8	17	2.86808e+08	28.9526
UniProtKB:P04818	Thymidylate synthase OS=Homo sapiens GN=TYMS PE=1 SV=3	408.41	26.2	1	5	5	10	1.33467e+08	35.6932
UniProtKB:O00233	26S proteasome non-ATPase regulatory subunit 9 OS=Homo sapiens GN=PSMD9 PE=1 SV=2	408.397	36.32	1	6	6	13	1.5581e+08	24.6385
UniProtKB:Q9Y6G9	Cytoplasmic dynein 1 light intermediate chain 1 OS=Homo sapiens GN=DYNC1LI1 PE=1 SV=3	407.562	30.59	1	13	13	23	2.5316e+08	56.544
UniProtKB:Q12888	Tumor suppressor p53-binding protein 1 OS=Homo sapiens GN=TP53BP1 PE=1 SV=2	407.542	10.09	1	13	13	17	1.03677e+08	213.443
UniProtKB:Q7Z4V5	Hepatoma-derived growth factor-related protein 2 OS=Homo sapiens GN=HDGFRP2 PE=1 SV=1	405.594	17.29	1	7	8	14	3.17309e+08	74.2722
UniProtKB:Q15907	Ras-related protein Rab-11B OS=Homo sapiens GN=RAB11B PE=1 SV=4	405.449	42.2	1	1	7	16	5.02951e+08	24.4735
UniProtKB:Q8IX12	Cell division cycle and apoptosis regulator protein 1 OS=Homo sapiens GN=CCAR1 PE=1 SV=2	405.442	12	1	12	12	22	1.89159e+08	132.739
UniProtKB:Q6UN15	Pre-mRNA 3'-end-processing factor FIP1 OS=Homo sapiens GN=FIP1L1 PE=1 SV=1	405.075	17.17	1	6	6	10	1.28864e+08	66.4865
UniProtKB:Q96A08	Histone H2B type 1-A OS=Homo sapiens GN=HIST1H2BA PE=1 SV=3	404.393	15.75	1	0	2	26	42717050332	14.1587
UniProtKB:Q9NZB2	Constitutive coactivator of PPAR-gamma-like protein 1 OS=Homo sapiens GN=FAM120A PE=1 SV=2	403.14	8.05	1	6	6	10	4.91712e+07	121.811
UniProtKB:P14923	Junction plakoglobin OS=Homo sapiens GN=JUP PE=1 SV=3	402.877	22.95	1	9	11	17	1.45707e+08	81.6927
UniProtKB:Q96T23	Remodeling and spacing factor 1 OS=Homo sapiens GN=RSF1 PE=1 SV=2	402.303	11.1	1	10	10	16	79868236	163.72
UniProtKB:P11717	Cation-independent mannose-6-phosphate receptor OS=Homo sapiens GN=IGF2R PE=1 SV=2	400.958	8.31	1	15	15	21	8.33855e+07	274.1
UniProtKB:Q9H7D7	WD repeat-containing protein 26 OS=Homo sapiens GN=WDR26 PE=1 SV=3	399.831	14.83	1	6	6	9	2.42075e+08	72.0787
UniProtKB:P52594	Arf-GAP domain and FG repeats-containing protein 1 OS=Homo sapiens GN=AGFG1 PE=1 SV=2	399.801	12.46	1	4	4	7	1.3152e+08	58.2242
UniProtKB:Q5T8P6	RNA-binding protein 26 OS=Homo sapiens GN=RBM26 PE=1 SV=3	399.394	8.24	1	6	7	14	1.216e+08	113.527
UniProtKB:P61586	Transforming protein RhoA OS=Homo sapiens GN=RHOA PE=1 SV=1	397.882	37.82	1	1	7	21	5.56348e+08	21.7541
UniProtKB:Q12769	Nuclear pore complex protein Nup160 OS=Homo sapiens GN=NUP160 PE=1 SV=3	397.461	11.21	1	12	12	19	1.4036e+08	162.017
UniProtKB:Q9HC38	Glyoxalase domain-containing protein 4 OS=Homo sapiens GN=GLOD4 PE=1 SV=1	396.997	32.59	1	10	10	24	582787792	34.7713
UniProtKB:P15927	Replication protein A 32 kDa subunit OS=Homo sapiens GN=RPA2 PE=1 SV=1	396.516	46.3	1	8	8	23	7.69854e+08	29.2285
UniProtKB:CON_P02584	(Bos taurus) Profilin-1	396.102	38.57	1	0	4	18	1.43342e+09	15.0475
UniProtKB:P18615	Negative elongation factor E OS=Homo sapiens GN=RDBP PE=1 SV=3	395.535	27.89	1	7	7	13	3.96562e+07	43.2137
UniProtKB:Q07866	Kinesin light chain 1 OS=Homo sapiens GN=KLC1 PE=1 SV=2	395.145	24.26	1	9	12	21	1.57498e+08	65.2689
UniProtKB:P82979	SAP domain-containing ribonucleoprotein OS=Homo sapiens GN=SARNP PE=1 SV=3	394.913	34.76	1	7	7	14	5.15603e+08	23.6564
UniProtKB:Q9UNF0	Protein kinase C and casein kinase substrate in neurons protein 2 OS=Homo sapiens GN=PACSIN2 PE=1 SV=2	394.453	25.1	1	10	10	15	1.33858e+08	55.7039
UniProtKB:O75934	Pre-mRNA-splicing factor SPF27 OS=Homo sapiens GN=BCAS2 PE=1 SV=1	394.45	45.33	1	7	7	16	415632347	26.115
UniProtKB:Q99961	Endophilin-A2 OS=Homo sapiens GN=SH3GL1 PE=1 SV=1	394.044	26.36	1	5	8	12	2.70239e+08	41.464
UniProtKB:Q9NX58	Cell growth-regulating nucleolar protein OS=Homo sapiens GN=LYAR PE=1 SV=2	393.84	23.22	1	6	6	10	1.61269e+08	43.5879
UniProtKB:O60716	Catenin delta-1 OS=Homo sapiens GN=CTNND1 PE=1 SV=1	393.745	14.57	1	10	10	17	116455384	108.103
UniProtKB:Q16881	Thioredoxin reductase 1, cytoplasmic OS=Homo sapiens GN=TXNRD1 PE=1 SV=3	393.18	19.26	1	8	8	14	2.42901e+08	70.8622
UniProtKB:Q16630	Cleavage and polyadenylation specificity factor subunit 6 OS=Homo sapiens GN=CPSF6 PE=1 SV=2	393.061	13.97	1	6	6	18	891510087	59.1734
UniProtKB:Q13158	Protein FADD OS=Homo sapiens GN=FADD PE=1 SV=1	392.731	25.96	1	3	3	9	1.30436e+08	23.2648
UniProtKB:P62841	40S ribosomal protein S15 OS=Homo sapiens GN=RPS15 PE=1 SV=2	391.696	40	1	3	3	18	8.24345e+08	17.0292
UniProtKB:Q5T3I0	G patch domain-containing protein 4 OS=Homo sapiens GN=GPATCH4 PE=1 SV=2	391.364	28.92	1	8	8	12	120783755	50.3508
UniProtKB:P35609	Alpha-actinin-2 OS=Homo sapiens GN=ACTN2 PE=1 SV=1	390.056	7.83	1	1	6	13	7.93244e+08	103.788
UniProtKB:O60264	SWI/SNF-related matrix-associated actin-dependent regulator of chromatin subfamily A member 5 OS=Homo sapiens GN=SMARCA5 PE=1 SV=1	389.946	9.03	1	7	9	18	7.24644e+07	121.828
UniProtKB:Q9UHI6	Probable ATP-dependent RNA helicase DDX20 OS=Homo sapiens GN=DDX20 PE=1 SV=2	389.49	16.38	1	10	10	16	1.75024e+08	92.1825
UniProtKB:Q92734	Protein TFG OS=Homo sapiens GN=TFG PE=1 SV=2	388.88	29.5	1	7	7	13	5.8771e+08	43.4212
UniProtKB:P62633	Cellular nucleic acid-binding protein OS=Homo sapiens GN=CNBP PE=1 SV=1	388.79	47.46	1	7	7	15	9.03339e+08	19.4496
UniProtKB:P09234	U1 small nuclear ribonucleoprotein C OS=Homo sapiens GN=SNRPC PE=1 SV=1	388.173	18.87	1	2	2	9	1.06361e+09	17.3812
UniProtKB:Q07812	Apoptosis regulator BAX OS=Homo sapiens GN=BAX PE=1 SV=1	387.955	36.46	1	6	6	17	2.53581e+08	21.1708
UniProtKB:O15042	U2-associated protein SR140 OS=Homo sapiens GN=SR140 PE=1 SV=2	387.313	13.7	1	9	9	16	1.78146e+08	118.219
UniProtKB:P62854	40S ribosomal protein S26 OS=Homo sapiens GN=RPS26 PE=1 SV=3	387.223	31.3	1	1	3	16	1.85362e+09	13.0071
UniProtKB:P98175	RNA-binding protein 10 OS=Homo sapiens GN=RBM10 PE=1 SV=3	386.622	10.43	1	8	8	14	1.41656e+08	103.469
UniProtKB:Q9UHY7	Enolase-phosphatase E1 OS=Homo sapiens GN=ENOPH1 PE=1 SV=1	386.53	25.29	1	4	4	11	4.06926e+08	28.9145
UniProtKB:P62993	Growth factor receptor-bound protein 2 OS=Homo sapiens GN=GRB2 PE=1 SV=1	386.5	50.69	1	10	10	20	3.28907e+08	25.1904
UniProtKB:Q7L5N1	COP9 signalosome complex subunit 6 OS=Homo sapiens GN=COPS6 PE=1 SV=1	386.497	32.11	1	7	7	13	227739659	36.1402
UniProtKB:Q13596	Sorting nexin-1 OS=Homo sapiens GN=SNX1 PE=1 SV=3	386.068	20.5	1	8	10	19	2.42108e+08	59.0331
UniProtKB:P13807	Glycogen [starch] synthase, muscle OS=Homo sapiens GN=GYS1 PE=1 SV=2	385.805	15.47	1	7	7	13	3.29487e+08	83.7325
UniProtKB:P46063	ATP-dependent DNA helicase Q1 OS=Homo sapiens GN=RECQL PE=1 SV=3	383.747	18.49	1	9	9	15	1.44617e+08	73.41
UniProtKB:Q9GZS3	WD repeat-containing protein 61 OS=Homo sapiens GN=WDR61 PE=1 SV=1	383.521	28.85	1	7	7	15	1.70888e+08	33.5598
UniProtKB:Q9H9A6	Leucine-rich repeat-containing protein 40 OS=Homo sapiens GN=LRRC40 PE=1 SV=1	382.4	26.25	1	10	10	19	5.9026e+08	68.2071
UniProtKB:P13798	Acylamino-acid-releasing enzyme OS=Homo sapiens GN=APEH PE=1 SV=4	382.04	14.21	1	9	9	17	1.68465e+08	81.1726
UniProtKB:P00367	Glutamate dehydrogenase 1, mitochondrial OS=Homo sapiens GN=GLUD1 PE=1 SV=2	381.771	27.24	1	4	11	15	2.12656e+08	61.3592
UniProtKB:P62851	40S ribosomal protein S25 OS=Homo sapiens GN=RPS25 PE=1 SV=1	379.304	28	1	4	4	16	3093411228	13.7337
UniProtKB:Q9ULX6	A-kinase anchor protein 8-like OS=Homo sapiens GN=AKAP8L PE=1 SV=3	378.15	14.71	1	8	8	15	119090787	71.6037
UniProtKB:Q13242	Serine/arginine-rich splicing factor 9 OS=Homo sapiens GN=SRSF9 PE=1 SV=1	377.395	47.51	1	9	10	26	825568398	25.5264
UniProtKB:Q13247	Serine/arginine-rich splicing factor 6 OS=Homo sapiens GN=SRSF6 PE=1 SV=2	377.215	24.13	1	7	10	18	6.57346e+08	39.5634
UniProtKB:Q03701	CCAAT/enhancer-binding protein zeta OS=Homo sapiens GN=CEBPZ PE=1 SV=3	376.973	15.75	1	12	12	20	8.21418e+07	120.898
UniProtKB:Q9BTW9	Tubulin-specific chaperone D OS=Homo sapiens GN=TBCD PE=1 SV=2	376.506	10.91	1	9	9	15	9.08618e+07	132.515
UniProtKB:Q5TFE4	5'-nucleotidase domain-containing protein 1 OS=Homo sapiens GN=NT5DC1 PE=1 SV=1	375.842	23.96	1	9	9	19	3.00311e+08	51.8119
UniProtKB:Q15437	Protein transport protein Sec23B OS=Homo sapiens GN=SEC23B PE=1 SV=2	375.719	11.6	1	5	6	11	1.76169e+08	86.4235
UniProtKB:P63208	S-phase kinase-associated protein 1 OS=Homo sapiens GN=SKP1 PE=1 SV=2	375.323	50.92	1	8	8	20	758222268	18.6462
UniProtKB:O15131	Importin subunit alpha-6 OS=Homo sapiens GN=KPNA5 PE=1 SV=2	375.16	10.26	1	0	4	13	4.02985e+08	60.3109
UniProtKB:O43583	Density-regulated protein OS=Homo sapiens GN=DENR PE=1 SV=2	374.875	39.39	1	5	5	9	2.19897e+08	22.0781
UniProtKB:P61513	60S ribosomal protein L37a OS=Homo sapiens GN=RPL37A PE=1 SV=2	374.836	32.61	1	2	2	11	6.00359e+08	10.2685
UniProtKB:O00154	Cytosolic acyl coenzyme A thioester hydrolase OS=Homo sapiens GN=ACOT7 PE=1 SV=3	373.918	25	1	7	7	15	8.30974e+08	41.7693
UniProtKB:Q6PJG6	BRCA1-associated protein required for ATM activation protein 1 OS=Homo sapiens GN=BAAT1 PE=1 SV=2	373.9	15.96	1	7	8	12	1.49303e+08	88.0629
UniProtKB:Q15121	Astrocytic phosphoprotein PEA-15 OS=Homo sapiens GN=PEA15 PE=1 SV=2	373.535	52.31	1	5	5	14	1.63936e+08	15.0308
UniProtKB:Q8IYD1	Eukaryotic peptide chain release factor GTP-binding subunit ERF3B OS=Homo sapiens GN=GSPT2 PE=1 SV=2	373.356	13.22	1	1	9	22	5.3152e+08	68.8396
UniProtKB:Q14181	DNA polymerase alpha subunit B OS=Homo sapiens GN=POLA2 PE=1 SV=2	373.187	25.92	1	9	9	16	1.30905e+08	65.9063
UniProtKB:Q13243	Serine/arginine-rich splicing factor 5 OS=Homo sapiens GN=SRSF5 PE=1 SV=1	371.577	20.22	1	4	5	14	5.69807e+08	31.2453
UniProtKB:Q9UNN5	FAS-associated factor 1 OS=Homo sapiens GN=FAF1 PE=1 SV=2	370.817	11.69	1	6	6	12	78444438	73.9076
UniProtKB:Q29RF7	Sister chromatid cohesion protein PDS5 homolog A OS=Homo sapiens GN=PDS5A PE=1 SV=1	369.997	4.64	1	4	4	7	2.15494e+07	150.734
UniProtKB:Q92928	Putative Ras-related protein Rab-1C OS=Homo sapiens GN=RAB1C PE=5 SV=2	369.98	19.9	1	0	4	10	5.31474e+08	22.003
UniProtKB:Q96ER3	Protein SAAL1 OS=Homo sapiens GN=SAAL1 PE=1 SV=2	369.76	16.03	1	7	7	15	1.01506e+08	53.5237
UniProtKB:O75436	Vacuolar protein sorting-associated protein 26A OS=Homo sapiens GN=VPS26A PE=1 SV=2	369.58	25.08	1	6	6	12	2.21934e+08	38.1457
UniProtKB:Q9P287	BRCA2 and CDKN1A-interacting protein OS=Homo sapiens GN=BCCIP PE=1 SV=1	368.444	30.25	1	6	6	13	976228446	35.9567
UniProtKB:Q9NVP1	ATP-dependent RNA helicase DDX18 OS=Homo sapiens GN=DDX18 PE=1 SV=2	368.437	21.19	1	11	11	16	3.38055e+08	75.3594
UniProtKB:P42224	Signal transducer and activator of transcription 1-alpha/beta OS=Homo sapiens GN=STAT1 PE=1 SV=2	368.041	11.87	1	7	7	10	1.43052e+08	87.2795
UniProtKB:P49721	Proteasome subunit beta type-2 OS=Homo sapiens GN=PSMB2 PE=1 SV=1	367.287	31.34	1	7	7	24	8.86507e+08	22.8217
UniProtKB:O95747	Serine/threonine-protein kinase OSR1 OS=Homo sapiens GN=OXSR1 PE=1 SV=1	367.025	22.58	1	8	10	16	3.23435e+08	57.9861
UniProtKB:Q12765	Secernin-1 OS=Homo sapiens GN=SCRN1 PE=1 SV=2	366.589	28.5	1	9	9	16	1.18073e+08	46.3525
UniProtKB:Q9NT62	Ubiquitin-like-conjugating enzyme ATG3 OS=Homo sapiens GN=ATG3 PE=1 SV=1	366.232	22.29	1	6	6	12	2.30291e+08	35.8415
UniProtKB:P15259	Phosphoglycerate mutase 2 OS=Homo sapiens GN=PGAM2 PE=1 SV=3	366.153	18.18	1	0	5	23	4.1322e+09	28.7478
UniProtKB:Q9BV86	Alpha N-terminal protein methyltransferase 1A OS=Homo sapiens GN=METTL11A PE=1 SV=3	364.771	22.87	1	4	4	7	7.26843e+07	25.3708
UniProtKB:P49006	MARCKS-related protein OS=Homo sapiens GN=MARCKSL1 PE=1 SV=2	364.662	17.95	1	3	3	13	1.10903e+09	19.5172
UniProtKB:P23434	Glycine cleavage system H protein, mitochondrial OS=Homo sapiens GN=GCSH PE=1 SV=2	364.06	11.56	1	1	1	4	355312319	18.8726
UniProtKB:Q9BQA1	Methylosome protein 50 OS=Homo sapiens GN=WDR77 PE=1 SV=1	363.51	29.24	1	8	8	18	4.00773e+08	36.7011
UniProtKB:Q92600	Cell differentiation protein RCD1 homolog OS=Homo sapiens GN=RQCD1 PE=1 SV=1	362.917	23.75	1	5	5	10	98367820	33.6099
UniProtKB:Q8WWK9	Cytoskeleton-associated protein 2 OS=Homo sapiens GN=CKAP2 PE=1 SV=1	362.837	10.1	1	5	5	7	3.96449e+07	76.9389
UniProtKB:O75439	Mitochondrial-processing peptidase subunit beta OS=Homo sapiens GN=PMPCB PE=1 SV=2	362.689	18.2	1	6	6	11	1.23302e+08	54.3315
UniProtKB:Q06203	Amidophosphoribosyltransferase OS=Homo sapiens GN=PPAT PE=1 SV=1	362.47	12.38	1	5	5	13	2.18616e+08	57.3624
UniProtKB:P50579	Methionine aminopeptidase 2 OS=Homo sapiens GN=METAP2 PE=1 SV=1	362.42	21.13	1	7	7	14	1.21472e+08	52.8581
UniProtKB:Q8IZP2	Putative protein FAM10A4 OS=Homo sapiens GN=FAM10A4 PE=5 SV=1	362.075	25.83	1	0	6	23	2.48738e+09	27.3897
UniProtKB:Q7Z2T5	TRM1-like protein OS=Homo sapiens GN=TRM1L PE=1 SV=2	362.065	13.64	1	6	6	8	1.04539e+08	81.6952
UniProtKB:Q8WVV9	Heterogeneous nuclear ribonucleoprotein L-like OS=Homo sapiens GN=HNRPLL PE=1 SV=1	361.733	13.28	1	4	5	12	4.71646e+08	60.0449
UniProtKB:P42858	Huntingtin OS=Homo sapiens GN=HTT PE=1 SV=2	361.293	4.39	1	8	8	13	6.97061e+07	347.383
UniProtKB:P62857	40S ribosomal protein S28 OS=Homo sapiens GN=RPS28 PE=1 SV=1	360.954	40.58	1	5	5	20	3.80528e+09	7.8362
UniProtKB:Q86XP3	ATP-dependent RNA helicase DDX42 OS=Homo sapiens GN=DDX42 PE=1 SV=1	360.949	15.14	1	10	10	18	1.16158e+08	102.912
UniProtKB:Q9Y5V3	Melanoma-associated antigen D1 OS=Homo sapiens GN=MAGED1 PE=1 SV=3	360.701	6.17	1	2	3	7	1.32812e+08	86.1073
UniProtKB:O14787	Transportin-2 OS=Homo sapiens GN=TNPO2 PE=1 SV=3	360.52	8.14	1	3	5	11	238159712	101.322
UniProtKB:O15397	Importin-8 OS=Homo sapiens GN=IPO8 PE=1 SV=2	360.503	7.62	1	5	6	12	1.38946e+08	119.861
UniProtKB:Q52LJ0	Protein FAM98B OS=Homo sapiens GN=FAM98B PE=1 SV=1	360.244	16.97	1	4	4	9	1.40651e+08	37.167
UniProtKB:Q15435	Protein phosphatase 1 regulatory subunit 7 OS=Homo sapiens GN=PPP1R7 PE=1 SV=1	360.007	21.39	1	5	5	10	1.33206e+09	41.5385
UniProtKB:P61086	Ubiquitin-conjugating enzyme E2 K OS=Homo sapiens GN=UBE2K PE=1 SV=3	359.823	60.5	1	8	8	14	2.36792e+08	22.3926
UniProtKB:P25685	DnaJ homolog subfamily B member 1 OS=Homo sapiens GN=DNAJB1 PE=1 SV=4	359.596	20.29	1	4	5	12	3.7476e+08	38.0204
UniProtKB:Q96C01	Protein FAM136A OS=Homo sapiens GN=FAM136A PE=1 SV=1	359.569	47.83	1	6	6	11	1.44478e+08	15.6307
UniProtKB:P46778	60S ribosomal protein L21 OS=Homo sapiens GN=RPL21 PE=1 SV=2	359.565	32.5	1	4	4	14	2.42254e+09	18.5531
UniProtKB:Q15645	Thyroid receptor-interacting protein 13 OS=Homo sapiens GN=TRIP13 PE=1 SV=2	359.313	25.69	1	9	9	14	2.34207e+08	48.5205
UniProtKB:Q9NYU2	UDP-glucose:glycoprotein glucosyltransferase 1 OS=Homo sapiens GN=UGGT1 PE=1 SV=3	358.79	11.58	1	10	10	16	1.15034e+08	177.078
UniProtKB:Q9H8H0	Nucleolar protein 11 OS=Homo sapiens GN=NOL11 PE=1 SV=1	358.744	16.41	1	9	9	16	2.71598e+08	81.0719
UniProtKB:O00116	Alkyldihydroxyacetonephosphate synthase, peroxisomal OS=Homo sapiens GN=AGPS PE=1 SV=1	358.64	26.6	1	12	12	23	2.81511e+08	72.8658
UniProtKB:P17480	Nucleolar transcription factor 1 OS=Homo sapiens GN=UBTF PE=1 SV=1	358.479	17.15	1	11	11	17	234031462	89.3502
UniProtKB:Q02543	60S ribosomal protein L18a OS=Homo sapiens GN=RPL18A PE=1 SV=2	357.739	36.36	1	7	7	22	1.28775e+09	20.7489
UniProtKB:O43660	Pleiotropic regulator 1 OS=Homo sapiens GN=PLRG1 PE=1 SV=1	357.51	22.37	1	7	7	13	165315113	57.1581
UniProtKB:Q9H2M9	Rab3 GTPase-activating protein non-catalytic subunit OS=Homo sapiens GN=RAB3GAP2 PE=1 SV=1	357.491	8.97	1	9	9	15	9.45976e+07	155.886
UniProtKB:P51116	Fragile X mental retardation syndrome-related protein 2 OS=Homo sapiens GN=FXR2 PE=1 SV=2	357.443	12.93	1	4	7	12	2.58228e+08	74.178
UniProtKB:Q8WU90	Zinc finger CCCH domain-containing protein 15 OS=Homo sapiens GN=ZC3H15 PE=1 SV=1	356.813	17.14	1	7	7	14	2.34802e+08	48.5726
UniProtKB:Q96SB4	Serine/threonine-protein kinase SRPK1 OS=Homo sapiens GN=SRPK1 PE=1 SV=2	356.799	28.09	1	11	12	17	2.44951e+08	74.2784
UniProtKB:O43432	Eukaryotic translation initiation factor 4 gamma 3 OS=Homo sapiens GN=EIF4G3 PE=1 SV=2	355.555	5.62	1	5	8	17	4.37493e+08	176.542
UniProtKB:P62308	Small nuclear ribonucleoprotein G OS=Homo sapiens GN=SNRPG PE=1 SV=1	355.416	26.32	1	0	2	10	1.61439e+09	8.49043
UniProtKB:A8MWD9	Small nuclear ribonucleoprotein G-like protein OS=Homo sapiens PE=3 SV=2	355.416	26.32	1	0	2	10	1.61439e+09	8.53845
UniProtKB:P60866	40S ribosomal protein S20 OS=Homo sapiens GN=RPS20 PE=1 SV=1	355.27	29.41	1	5	5	21	1.83095e+09	13.3643
UniProtKB:Q9H773	dCTP pyrophosphatase 1 OS=Homo sapiens GN=DCTPP1 PE=1 SV=1	355.123	58.24	1	9	9	19	4.05951e+08	18.6694
UniProtKB:Q96A65	Exocyst complex component 4 OS=Homo sapiens GN=EXOC4 PE=1 SV=1	354.787	13.96	1	9	9	19	8.06288e+07	110.429
UniProtKB:P36507	Dual specificity mitogen-activated protein kinase kinase 2 OS=Homo sapiens GN=MAP2K2 PE=1 SV=1	354.519	16.75	1	3	5	9	1.18783e+08	44.3961
UniProtKB:Q08379	Golgin subfamily A member 2 OS=Homo sapiens GN=GOLGA2 PE=1 SV=3	354.408	9.08	1	7	7	13	7.21125e+07	113.017
UniProtKB:P61224	Ras-related protein Rap-1b OS=Homo sapiens GN=RAP1B PE=1 SV=1	353.2	45.65	1	1	6	14	5.67939e+08	20.8116
UniProtKB:Q9NR31	GTP-binding protein SAR1a OS=Homo sapiens GN=SAR1A PE=1 SV=1	352.682	51.01	1	5	7	13	5.58624e+08	22.3525
UniProtKB:Q14694	Ubiquitin carboxyl-terminal hydrolase 10 OS=Homo sapiens GN=USP10 PE=1 SV=2	352.597	25.19	1	12	12	15	2.88871e+08	87.0798
UniProtKB:P50851	Lipopolysaccharide-responsive and beige-like anchor protein OS=Homo sapiens GN=LRBA PE=1 SV=4	352.384	2.72	1	5	6	11	5.44919e+07	318.906
UniProtKB:Q9Y2S0	DNA-directed RNA polymerases I and III subunit RPAC2 OS=Homo sapiens GN=POLR1D PE=1 SV=1	352.105	50.38	1	5	5	12	2.06703e+08	15.2274
UniProtKB:O94760	N(G),N(G)-dimethylarginine dimethylaminohydrolase 1 OS=Homo sapiens GN=DDAH1 PE=1 SV=3	352.024	47.02	1	8	9	15	3.14878e+08	31.1019
UniProtKB:Q15370	Transcription elongation factor B polypeptide 2 OS=Homo sapiens GN=TCEB2 PE=1 SV=1	352	51.69	1	6	6	17	8.90958e+08	13.1246
UniProtKB:Q9Y6E2	Basic leucine zipper and W2 domain-containing protein 2 OS=Homo sapiens GN=BZW2 PE=1 SV=1	351.124	13.37	1	4	6	15	1.714e+08	48.132
UniProtKB:P61970	Nuclear transport factor 2 OS=Homo sapiens GN=NUTF2 PE=1 SV=1	350.565	44.09	1	4	4	14	2492447115	14.469
UniProtKB:Q9UPT5	Exocyst complex component 7 OS=Homo sapiens GN=EXOC7 PE=1 SV=3	350.018	10.2	1	5	5	9	4.48905e+07	83.3301
UniProtKB:P41227	N-alpha-acetyltransferase 10, NatA catalytic subunit OS=Homo sapiens GN=NAA10 PE=1 SV=1	348.797	34.04	1	5	7	15	3.50658e+08	26.4419
UniProtKB:O75822	Eukaryotic translation initiation factor 3 subunit J OS=Homo sapiens GN=EIF3J PE=1 SV=2	348.437	32.95	1	6	6	13	360443294	29.0445
UniProtKB:O75312	Zinc finger protein ZPR1 OS=Homo sapiens GN=ZNF259 PE=1 SV=1	348.043	30.72	1	8	8	13	2.14451e+08	50.893
UniProtKB:P36954	DNA-directed RNA polymerase II subunit RPB9 OS=Homo sapiens GN=POLR2I PE=1 SV=1	347.669	44	1	4	4	9	5.63441e+07	14.5136
UniProtKB:Q8IWA0	WD repeat-containing protein 75 OS=Homo sapiens GN=WDR75 PE=1 SV=1	347.005	13.86	1	8	8	13	2.48353e+08	94.4385
UniProtKB:Q86U42	Polyadenylate-binding protein 2 OS=Homo sapiens GN=PABPN1 PE=1 SV=3	346.899	14.71	1	4	4	14	6.3377e+08	32.729
UniProtKB:Q8NBF2	NHL repeat-containing protein 2 OS=Homo sapiens GN=NHLRC2 PE=1 SV=1	345.85	13.91	1	6	6	10	6.29818e+07	79.3935
UniProtKB:Q8TAF3	WD repeat-containing protein 48 OS=Homo sapiens GN=WDR48 PE=1 SV=1	344.458	10.04	1	4	4	11	8.36841e+07	76.1624
UniProtKB:Q9BQ39	ATP-dependent RNA helicase DDX50 OS=Homo sapiens GN=DDX50 PE=1 SV=1	344.458	15.47	1	6	8	14	2.67286e+08	82.5141
UniProtKB:Q9UKD2	mRNA turnover protein 4 homolog OS=Homo sapiens GN=MRTO4 PE=1 SV=2	344.424	37.66	1	10	10	20	2.57262e+08	27.5429
UniProtKB:Q08170	Serine/arginine-rich splicing factor 4 OS=Homo sapiens GN=SRSF4 PE=1 SV=2	343.874	13.36	1	3	6	15	736112789	56.6453
UniProtKB:Q9NX24	H/ACA ribonucleoprotein complex subunit 2 OS=Homo sapiens GN=NHP2 PE=1 SV=1	343.424	54.25	1	6	6	14	2.95003e+08	17.1899
UniProtKB:O43615	Mitochondrial import inner membrane translocase subunit TIM44 OS=Homo sapiens GN=TIMM44 PE=1 SV=2	343.414	10.4	1	4	4	10	9.27993e+07	51.3235
UniProtKB:O75874	Isocitrate dehydrogenase [NADP] cytoplasmic OS=Homo sapiens GN=IDH1 PE=1 SV=2	343.132	22.71	1	8	9	20	2.58522e+08	46.6295
UniProtKB:O14562	Ubiquitin domain-containing protein UBFD1 OS=Homo sapiens GN=UBFD1 PE=1 SV=1	343.017	7.69	1	3	3	7	8.86239e+07	56.86
UniProtKB:A6NL28	Putative tropomyosin alpha-3 chain-like protein OS=Homo sapiens PE=5 SV=2	342.99	10.76	1	3	3	9	1.28935e+09	26.2529
UniProtKB:Q13523	Serine/threonine-protein kinase PRP4 homolog OS=Homo sapiens GN=PRPF4B PE=1 SV=2	342.957	9.33	1	7	7	11	315862063	116.902
UniProtKB:Q9NYL9	Tropomodulin-3 OS=Homo sapiens GN=TMOD3 PE=1 SV=1	342.345	25	1	6	6	8	1.06713e+08	39.5703
UniProtKB:Q9BRP8	Partner of Y14 and mago OS=Homo sapiens GN=WIBG PE=1 SV=1	341.9	36.76	1	5	5	10	1.05236e+08	22.642
UniProtKB:Q7Z3B4	Nucleoporin p54 OS=Homo sapiens GN=NUP54 PE=1 SV=2	341.055	15.58	1	6	6	8	7.1537e+07	55.4014
UniProtKB:P49458	Signal recognition particle 9 kDa protein OS=Homo sapiens GN=SRP9 PE=1 SV=2	339.6	34.88	1	3	3	10	1.13767e+09	10.1051
UniProtKB:Q96EI5	Transcription elongation factor A protein-like 4 OS=Homo sapiens GN=TCEAL4 PE=1 SV=2	339.353	21.4	1	4	4	8	3.8631e+07	24.6319
UniProtKB:Q99496	E3 ubiquitin-protein ligase RING2 OS=Homo sapiens GN=RNF2 PE=1 SV=1	339.279	24.4	1	4	6	9	1.8627e+08	37.6316
UniProtKB:Q15750	TGF-beta-activated kinase 1 and MAP3K7-binding protein 1 OS=Homo sapiens GN=TAB1 PE=1 SV=1	338.337	17.86	1	5	5	9	1.03056e+08	54.6104
Ensembl:CON_ENSBTAP00000024146	(Bos taurus) similar to alpha-2-macroglobulin isoform 1	338.33	12.39	1	12	14	19	1.95106e+08	164.239
UniProtKB:P30837	Aldehyde dehydrogenase X, mitochondrial OS=Homo sapiens GN=ALDH1B1 PE=1 SV=3	337.303	18.38	1	6	7	11	1.28924e+08	57.1702
UniProtKB:A6NDG6	Phosphoglycolate phosphatase OS=Homo sapiens GN=PGP PE=1 SV=1	336.819	28.04	1	7	7	12	2.1237e+08	33.9845
UniProtKB:O14776	Transcription elongation regulator 1 OS=Homo sapiens GN=TCERG1 PE=1 SV=2	336.723	12.57	1	12	12	22	3.2567e+08	123.823
UniProtKB:P07864	L-lactate dehydrogenase C chain OS=Homo sapiens GN=LDHC PE=2 SV=4	335.655	3.61	1	0	1	8	13798947884	36.2882
UniProtKB:Q92733	Proline-rich protein PRCC OS=Homo sapiens GN=PRCC PE=1 SV=1	334.757	11.2	1	3	3	6	5.24882e+07	52.3855
UniProtKB:O00170	AH receptor-interacting protein OS=Homo sapiens GN=AIP PE=1 SV=2	334.736	38.18	1	9	9	21	3.74827e+08	37.6121
UniProtKB:Q15785	Mitochondrial import receptor subunit TOM34 OS=Homo sapiens GN=TOMM34 PE=1 SV=2	334.531	26.86	1	7	7	13	2.38835e+08	34.5378
UniProtKB:P22695	Cytochrome b-c1 complex subunit 2, mitochondrial OS=Homo sapiens GN=UQCRC2 PE=1 SV=3	334.184	25.17	1	7	7	11	1.43553e+08	48.4129
UniProtKB:Q86Y82	Syntaxin-12 OS=Homo sapiens GN=STX12 PE=1 SV=1	334.138	27.17	1	6	6	12	2.46361e+08	31.6223
UniProtKB:P83731	60S ribosomal protein L24 OS=Homo sapiens GN=RPL24 PE=1 SV=1	334	26.75	1	5	5	15	2.0169e+09	17.7679
UniProtKB:Q9H9B4	Sideroflexin-1 OS=Homo sapiens GN=SFXN1 PE=1 SV=4	333.917	41.61	1	9	10	17	2.78836e+08	35.5963
UniProtKB:Q9BZK7	F-box-like/WD repeat-containing protein TBL1XR1 OS=Homo sapiens GN=TBL1XR1 PE=1 SV=1	333.838	15.37	1	3	6	12	73042429	55.5601
UniProtKB:O75828	Carbonyl reductase [NADPH] 3 OS=Homo sapiens GN=CBR3 PE=1 SV=3	333.75	10.47	1	0	2	8	5.79446e+08	30.8307
UniProtKB:Q9H0S4	Probable ATP-dependent RNA helicase DDX47 OS=Homo sapiens GN=DDX47 PE=1 SV=1	333.655	27.91	1	9	9	14	2.33137e+08	50.6147
UniProtKB:Q96F07	Cytoplasmic FMR1-interacting protein 2 OS=Homo sapiens GN=CYFIP2 PE=1 SV=2	333.535	5.71	1	3	6	13	1.51173e+08	148.302
UniProtKB:Q27J81	Inverted formin-2 OS=Homo sapiens GN=INF2 PE=1 SV=2	333.493	5.52	1	4	4	11	4.29543e+07	135.54
UniProtKB:O75717	WD repeat and HMG-box DNA-binding protein 1 OS=Homo sapiens GN=WDHD1 PE=1 SV=1	333.49	8.5	1	7	7	11	77431770	125.888
UniProtKB:O95684	FGFR1 oncogene partner OS=Homo sapiens GN=FGFR1OP PE=1 SV=1	332.944	8.52	1	3	3	7	3.02683e+07	43.0389
UniProtKB:Q96IZ0	PRKC apoptosis WT1 regulator protein OS=Homo sapiens GN=PAWR PE=1 SV=1	332.678	28.24	1	5	6	9	9.77746e+07	36.5454
UniProtKB:Q06546	GA-binding protein alpha chain OS=Homo sapiens GN=GABPA PE=1 SV=1	331.86	17.62	1	5	5	10	1.20177e+08	51.2631
UniProtKB:Q96PZ0	Pseudouridylate synthase 7 homolog OS=Homo sapiens GN=PUS7 PE=1 SV=2	331.21	18.61	1	7	7	9	7.55937e+07	74.9882
UniProtKB:O95777	N-alpha-acetyltransferase 38, NatC auxiliary subunit OS=Homo sapiens GN=NAA38 PE=1 SV=3	331.14	54.17	1	5	5	13	8.23005e+08	10.3963
UniProtKB:Q08043	Alpha-actinin-3 OS=Homo sapiens GN=ACTN3 PE=1 SV=2	330.648	5.55	1	0	5	13	4.51728e+08	103.176
UniProtKB:Q15942	Zyxin OS=Homo sapiens GN=ZYX PE=1 SV=1	329.703	19.41	1	6	6	12	1.61808e+08	61.2382
UniProtKB:CON_Q0IIK2	(Bos taurus) Transferrin	329.643	16.62	1	0	9	17	8.23795e+07	77.6887
UniProtKB:CON_Q29443	Serotransferrin - Bos taurus (Bovine).	329.643	17.08	1	0	9	17	8.23795e+07	75.7807
UniProtKB:P13473	Lysosome-associated membrane glycoprotein 2 OS=Homo sapiens GN=LAMP2 PE=1 SV=2	329.258	9.27	1	4	4	13	467963349	44.9323
UniProtKB:P63151	Serine/threonine-protein phosphatase 2A 55 kDa regulatory subunit B alpha isoform OS=Homo sapiens GN=PPP2R2A PE=1 SV=1	329.045	19.46	1	3	7	14	1.94687e+08	51.6595
UniProtKB:P20648	Potassium-transporting ATPase alpha chain 1 OS=Homo sapiens GN=ATP4A PE=2 SV=5	329.015	2.71	1	0	2	8	4.68101e+08	114.045
UniProtKB:P05091	Aldehyde dehydrogenase, mitochondrial OS=Homo sapiens GN=ALDH2 PE=1 SV=2	328.42	22.44	1	8	9	14	9.99023e+07	56.3456
UniProtKB:P46939	Utrophin OS=Homo sapiens GN=UTRN PE=1 SV=2	327.989	5.62	1	14	14	16	4.5244e+07	394.22
UniProtKB:Q68E01	Integrator complex subunit 3 OS=Homo sapiens GN=INTS3 PE=1 SV=1	327.57	11.31	1	7	7	10	4.99722e+07	117.994
UniProtKB:P30046	D-dopachrome decarboxylase OS=Homo sapiens GN=DDT PE=1 SV=3	327.454	56.78	1	1	6	20	2.12565e+09	12.7037
UniProtKB:O00161	Synaptosomal-associated protein 23 OS=Homo sapiens GN=SNAP23 PE=1 SV=1	327.335	45.97	1	6	6	11	2.2301e+08	23.3395
UniProtKB:P10515	Dihydrolipoyllysine-residue acetyltransferase component of pyruvate dehydrogenase complex, mitochondrial OS=Homo sapiens GN=DLAT PE=1 SV=3	327.298	15.15	1	7	7	11	2.30207e+08	68.9531
UniProtKB:Q7Z5L9	Interferon regulatory factor 2-binding protein 2 OS=Homo sapiens GN=IRF2BP2 PE=1 SV=2	327.106	14.31	1	4	5	9	7.50109e+07	60.9867
UniProtKB:P35244	Replication protein A 14 kDa subunit OS=Homo sapiens GN=RPA3 PE=1 SV=1	327.042	60.33	1	6	6	16	1.19574e+09	13.5599
UniProtKB:O95347	Structural maintenance of chromosomes protein 2 OS=Homo sapiens GN=SMC2 PE=1 SV=2	326.575	16.88	1	18	18	26	1.59076e+08	135.572
UniProtKB:Q96PU8	Protein quaking OS=Homo sapiens GN=QKI PE=1 SV=1	326.098	27.57	1	7	7	16	1.99641e+08	37.6467
UniProtKB:P21266	Glutathione S-transferase Mu 3 OS=Homo sapiens GN=GSTM3 PE=1 SV=3	325.943	36	1	6	7	16	4.61138e+08	26.5421
UniProtKB:Q96RS6	NudC domain-containing protein 1 OS=Homo sapiens GN=NUDCD1 PE=1 SV=2	325.623	13.89	1	6	6	12	110944937	66.7133
UniProtKB:Q96EA4	Protein Spindly OS=Homo sapiens GN=CCDC99 PE=1 SV=2	325.56	18.18	1	7	7	11	59748251	70.1278
UniProtKB:O60678	Protein arginine N-methyltransferase 3 OS=Homo sapiens GN=PRMT3 PE=1 SV=2	325.405	16.01	1	6	6	11	1.30579e+08	59.8648
UniProtKB:Q14692	Ribosome biogenesis protein BMS1 homolog OS=Homo sapiens GN=BMS1 PE=1 SV=1	325.32	10.22	1	9	9	15	2.04812e+08	145.716
UniProtKB:Q7L576	Cytoplasmic FMR1-interacting protein 1 OS=Homo sapiens GN=CYFIP1 PE=1 SV=1	325.173	8.22	1	6	9	16	1.51173e+08	145.089
UniProtKB:P61019	Ras-related protein Rab-2A OS=Homo sapiens GN=RAB2A PE=1 SV=1	325.137	38.68	1	3	6	14	1.59047e+08	23.5308
UniProtKB:Q9P2I0	Cleavage and polyadenylation specificity factor subunit 2 OS=Homo sapiens GN=CPSF2 PE=1 SV=2	324.952	12.66	1	7	7	15	8.1765e+07	88.4307
UniProtKB:P35611	Alpha-adducin OS=Homo sapiens GN=ADD1 PE=1 SV=2	324.949	13.43	1	7	7	9	1.3221e+08	80.9047
UniProtKB:P12532	Creatine kinase U-type, mitochondrial OS=Homo sapiens GN=CKMT1A PE=1 SV=1	324.628	30.22	1	7	8	16	2.7826e+08	47.0072
UniProtKB:Q6I9Y2	THO complex subunit 7 homolog OS=Homo sapiens GN=THOC7 PE=1 SV=3	324.361	32.84	1	5	5	8	7.72799e+07	23.728
UniProtKB:O14545	TRAF-type zinc finger domain-containing protein 1 OS=Homo sapiens GN=TRAFD1 PE=1 SV=1	324.32	8.42	1	4	4	7	5.20145e+07	64.8001
UniProtKB:Q9NPQ8	Synembryn-A OS=Homo sapiens GN=RIC8A PE=1 SV=3	323.463	26.55	1	9	10	16	1.86077e+08	59.6715
UniProtKB:O14974	Protein phosphatase 1 regulatory subunit 12A OS=Homo sapiens GN=PPP1R12A PE=1 SV=1	323.337	5.24	1	4	4	7	1.8438e+08	115.211
UniProtKB:Q9H2U1	Probable ATP-dependent RNA helicase DHX36 OS=Homo sapiens GN=DHX36 PE=1 SV=2	323.31	9.82	1	6	6	8	1.39775e+08	114.688
UniProtKB:Q8WXX5	DnaJ homolog subfamily C member 9 OS=Homo sapiens GN=DNAJC9 PE=1 SV=1	323.23	27.31	1	6	6	10	1.3167e+08	29.8911
UniProtKB:Q16222	UDP-N-acetylhexosamine pyrophosphorylase OS=Homo sapiens GN=UAP1 PE=1 SV=3	323.107	17.82	1	6	6	9	4.83736e+07	58.7318
UniProtKB:P52789	Hexokinase-2 OS=Homo sapiens GN=HK2 PE=1 SV=2	322.558	14.5	1	8	11	18	1.44363e+08	102.313
UniProtKB:P22087	rRNA 2'-O-methyltransferase fibrillarin OS=Homo sapiens GN=FBL PE=1 SV=2	321.957	42.06	1	10	11	24	7.117e+08	33.7634
UniProtKB:P49448	Glutamate dehydrogenase 2, mitochondrial OS=Homo sapiens GN=GLUD2 PE=1 SV=2	321.645	16.67	1	0	7	10	1.53416e+08	61.3954
UniProtKB:Q9UG63	ATP-binding cassette sub-family F member 2 OS=Homo sapiens GN=ABCF2 PE=1 SV=2	321.145	21.51	1	13	13	20	208267692	71.2446
UniProtKB:Q9NUY8	TBC1 domain family member 23 OS=Homo sapiens GN=TBC1D23 PE=1 SV=3	321.079	6.58	1	3	3	7	6.77949e+07	78.2721
UniProtKB:Q9P1F3	UPF0727 protein C6orf115 OS=Homo sapiens GN=C6orf115 PE=1 SV=1	320.879	46.91	1	3	3	12	1.73858e+09	9.05086
UniProtKB:Q92747	Actin-related protein 2/3 complex subunit 1A OS=Homo sapiens GN=ARPC1A PE=1 SV=2	320.793	27.03	1	6	7	12	1.77318e+08	41.5427
UniProtKB:Q9H910	Hematological and neurological expressed 1-like protein OS=Homo sapiens GN=HN1L PE=1 SV=1	319.335	53.68	1	7	7	16	6.43422e+08	20.051
UniProtKB:Q9NQZ2	Something about silencing protein 10 OS=Homo sapiens GN=UTP3 PE=1 SV=1	319.106	17.54	1	5	5	12	7.2859e+07	54.5251
UniProtKB:Q9Y5L4	Mitochondrial import inner membrane translocase subunit Tim13 OS=Homo sapiens GN=TIMM13 PE=1 SV=1	318.848	61.05	1	5	5	11	856669962	10.493
UniProtKB:O43681	ATPase ASNA1 OS=Homo sapiens GN=ASNA1 PE=1 SV=2	318.715	40.8	1	9	9	16	2.20333e+08	38.7674
UniProtKB:P04844	Dolichyl-diphosphooligosaccharide--protein glycosyltransferase subunit 2 OS=Homo sapiens GN=RPN2 PE=1 SV=3	318.6	11.25	1	4	4	8	1.91097e+08	69.241
UniProtKB:Q13733	Sodium/potassium-transporting ATPase subunit alpha-4 OS=Homo sapiens GN=ATP1A4 PE=1 SV=3	318.29	7.19	1	0	5	9	3.49951e+08	114.093
UniProtKB:Q92879	CUGBP Elav-like family member 1 OS=Homo sapiens GN=CELF1 PE=1 SV=2	317.911	10.49	1	4	4	9	1.21808e+08	52.0299
UniProtKB:P41223	Protein BUD31 homolog OS=Homo sapiens GN=BUD31 PE=1 SV=2	317.74	33.33	1	4	4	10	8.21167e+07	16.9886
UniProtKB:Q14677	Clathrin interactor 1 OS=Homo sapiens GN=CLINT1 PE=1 SV=1	317.547	15.68	1	9	9	16	2.43651e+08	68.2158
UniProtKB:Q9H2G2	STE20-like serine/threonine-protein kinase OS=Homo sapiens GN=SLK PE=1 SV=1	317.16	10.2	1	9	9	10	7.74478e+07	142.607
UniProtKB:P40938	Replication factor C subunit 3 OS=Homo sapiens GN=RFC3 PE=1 SV=2	317.144	17.42	1	5	5	11	1.33498e+08	40.5299
UniProtKB:O00422	Histone deacetylase complex subunit SAP18 OS=Homo sapiens GN=SAP18 PE=1 SV=1	316.887	42.48	1	7	7	15	2.54367e+08	17.55
UniProtKB:P51532	Transcription activator BRG1 OS=Homo sapiens GN=SMARCA4 PE=1 SV=2	316.632	5.46	1	3	7	11	8.02328e+07	184.53
UniProtKB:O95983	Methyl-CpG-binding domain protein 3 OS=Homo sapiens GN=MBD3 PE=1 SV=1	316.547	23.71	1	5	5	16	1.60331e+08	32.8233
UniProtKB:Q9H8Y8	Golgi reassembly-stacking protein 2 OS=Homo sapiens GN=GORASP2 PE=1 SV=3	316.379	17.7	1	5	5	9	1.64218e+08	47.116
UniProtKB:Q9BRS2	Serine/threonine-protein kinase RIO1 OS=Homo sapiens GN=RIOK1 PE=1 SV=2	315.81	10.21	1	5	5	10	6.5952e+07	65.5417
UniProtKB:Q02750	Dual specificity mitogen-activated protein kinase kinase 1 OS=Homo sapiens GN=MAP2K1 PE=1 SV=2	315.602	14.5	1	2	4	10	1.30951e+08	43.4113
UniProtKB:Q9Y3D0	Protein FAM96B OS=Homo sapiens GN=FAM96B PE=1 SV=1	315.37	31.9	1	4	4	8	1.16486e+08	17.6521
UniProtKB:P08134	Rho-related GTP-binding protein RhoC OS=Homo sapiens GN=RHOC PE=1 SV=1	315.292	31.61	1	0	6	18	4.97467e+08	21.9923
UniProtKB:P82970	High mobility group nucleosome-binding domain-containing protein 5 OS=Homo sapiens GN=HMGN5 PE=1 SV=1	314.935	32.27	1	7	7	12	3.92655e+08	31.5059
UniProtKB:Q96AG4	Leucine-rich repeat-containing protein 59 OS=Homo sapiens GN=LRRC59 PE=1 SV=1	314.89	22.48	1	6	6	10	1.6585e+08	34.9089
UniProtKB:Q15819	Ubiquitin-conjugating enzyme E2 variant 2 OS=Homo sapiens GN=UBE2V2 PE=1 SV=4	314.768	55.17	1	3	7	14	9.23908e+08	16.3522
UniProtKB:O95782	AP-2 complex subunit alpha-1 OS=Homo sapiens GN=AP2A1 PE=1 SV=3	314.506	14.02	1	3	10	17	2.866e+08	107.478
UniProtKB:Q8NI27	THO complex subunit 2 OS=Homo sapiens GN=THOC2 PE=1 SV=2	314.188	6.4	1	8	8	13	1.19363e+08	182.659
UniProtKB:P42772	Cyclin-dependent kinase 4 inhibitor B OS=Homo sapiens GN=CDKN2B PE=1 SV=1	314.12	29.71	1	0	2	8	2.69671e+08	14.7125
UniProtKB:Q8N0Y7	Probable phosphoglycerate mutase 4 OS=Homo sapiens GN=PGAM4 PE=1 SV=1	313.913	17.72	1	0	3	21	4200316966	28.7588
UniProtKB:Q12840	Kinesin heavy chain isoform 5A OS=Homo sapiens GN=KIF5A PE=1 SV=2	313.842	6.49	1	0	5	10	1.33856e+08	117.306
UniProtKB:O60282	Kinesin heavy chain isoform 5C OS=Homo sapiens GN=KIF5C PE=1 SV=1	313.842	7	1	0	5	10	1.33856e+08	109.427
UniProtKB:P42167	Lamina-associated polypeptide 2, isoforms beta/gamma OS=Homo sapiens GN=TMPO PE=1 SV=2	312.483	21.37	1	0	7	17	2.23537e+08	50.6395
UniProtKB:O75506	Heat shock factor-binding protein 1 OS=Homo sapiens GN=HSBP1 PE=1 SV=1	312.433	47.37	1	3	3	7	2.41133e+08	8.53818
UniProtKB:P61353	60S ribosomal protein L27 OS=Homo sapiens GN=RPL27 PE=1 SV=2	312.397	20.59	1	3	3	17	2.43009e+09	15.7877
UniProtKB:O75390	Citrate synthase, mitochondrial OS=Homo sapiens GN=CS PE=1 SV=2	312.049	22.53	1	12	12	26	6.33136e+08	51.6795
UniProtKB:Q96G03	Phosphoglucomutase-2 OS=Homo sapiens GN=PGM2 PE=1 SV=4	312.024	18.79	1	9	9	16	4.06381e+08	68.2404
UniProtKB:P51148	Ras-related protein Rab-5C OS=Homo sapiens GN=RAB5C PE=1 SV=2	312.023	33.33	1	3	6	13	3.72542e+08	23.4678
UniProtKB:O15027	Protein transport protein Sec16A OS=Homo sapiens GN=SEC16A PE=1 SV=3	311.607	8.03	1	10	10	15	9.44282e+07	233.373
UniProtKB:Q96DI7	U5 small nuclear ribonucleoprotein 40 kDa protein OS=Homo sapiens GN=SNRNP40 PE=1 SV=1	311.133	33.05	1	8	8	13	4.48109e+08	39.2857
UniProtKB:Q9UHV9	Prefoldin subunit 2 OS=Homo sapiens GN=PFDN2 PE=1 SV=1	310.642	36.36	1	5	5	16	7.56918e+08	16.6376
UniProtKB:P62263	40S ribosomal protein S14 OS=Homo sapiens GN=RPS14 PE=1 SV=3	310.566	40.4	1	8	8	21	2.15441e+09	16.2625
UniProtKB:Q13085	Acetyl-CoA carboxylase 1 OS=Homo sapiens GN=ACACA PE=1 SV=2	308.767	8.44	1	10	12	17	8.78456e+07	265.385
UniProtKB:P78417	Glutathione S-transferase omega-1 OS=Homo sapiens GN=GSTO1 PE=1 SV=2	308.604	39.83	1	13	13	25	533267241	27.548
UniProtKB:Q15643	Thyroid receptor-interacting protein 11 OS=Homo sapiens GN=TRIP11 PE=1 SV=3	308.28	5.15	1	6	6	7	1.95279e+07	227.447
UniProtKB:O60869	Endothelial differentiation-related factor 1 OS=Homo sapiens GN=EDF1 PE=1 SV=1	308.13	31.08	1	5	5	10	1.99473e+08	16.3589
UniProtKB:Q8WX92	Negative elongation factor B OS=Homo sapiens GN=COBRA1 PE=1 SV=1	307.944	11.55	1	5	5	10	1.33055e+08	65.6554
UniProtKB:A6NHG4	D-dopachrome decarboxylase-like protein OS=Homo sapiens GN=DDTL PE=2 SV=1	307.004	41.79	1	0	5	18	2.12565e+09	14.1863
UniProtKB:P35613	Basigin OS=Homo sapiens GN=BSG PE=1 SV=2	306.922	13.25	1	4	4	14	639505119	42.1741
UniProtKB:P07602	Proactivator polypeptide OS=Homo sapiens GN=PSAP PE=1 SV=2	306.502	14.31	1	9	9	17	7.12529e+08	58.0739
UniProtKB:P62491	Ras-related protein Rab-11A OS=Homo sapiens GN=RAB11A PE=1 SV=3	306.461	32.87	1	0	6	15	5.02951e+08	24.3784
UniProtKB:P61758	Prefoldin subunit 3 OS=Homo sapiens GN=VBP1 PE=1 SV=3	306.112	35.53	1	7	7	13	4.32358e+08	22.6434
UniProtKB:Q9P013	Protein CWC15 homolog OS=Homo sapiens GN=CWC15 PE=1 SV=2	305.959	19.65	1	4	4	7	7.13381e+07	26.6083
UniProtKB:P48637	Glutathione synthetase OS=Homo sapiens GN=GSS PE=1 SV=1	305.934	23.42	1	9	9	19	2.45044e+08	52.3523
UniProtKB:Q9NRX4	14 kDa phosphohistidine phosphatase OS=Homo sapiens GN=PHPT1 PE=1 SV=1	305.734	47.2	1	4	4	8	2.68606e+08	13.8237
UniProtKB:O60832	H/ACA ribonucleoprotein complex subunit 4 OS=Homo sapiens GN=DKC1 PE=1 SV=3	305.699	27.63	1	11	11	24	4.06498e+08	57.6378
UniProtKB:P17655	Calpain-2 catalytic subunit OS=Homo sapiens GN=CAPN2 PE=1 SV=5	305.494	21.71	1	12	12	18	2.02346e+08	79.9588
UniProtKB:Q9Y3Y2	Friend of PRMT1 protein OS=Homo sapiens GN=C1orf77 PE=1 SV=2	305.38	29.03	1	5	5	10	2.84542e+08	26.3803
UniProtKB:Q13177	Serine/threonine-protein kinase PAK 2 OS=Homo sapiens GN=PAK2 PE=1 SV=3	305.057	30.92	1	7	12	16	181488131	58.0059
UniProtKB:O00629	Importin subunit alpha-4 OS=Homo sapiens GN=KPNA4 PE=1 SV=1	304.762	25.34	1	5	7	12	2.78001e+08	57.8506
UniProtKB:P55210	Caspase-7 OS=Homo sapiens GN=CASP7 PE=1 SV=1	304.757	13.2	1	2	2	3	1.28427e+07	34.2548
UniProtKB:O00203	AP-3 complex subunit beta-1 OS=Homo sapiens GN=AP3B1 PE=1 SV=3	304.563	9.14	1	8	8	12	9.09534e+07	121.245
UniProtKB:Q8IWZ3	Ankyrin repeat and KH domain-containing protein 1 OS=Homo sapiens GN=ANKHD1 PE=1 SV=1	304.267	6.37	1	4	12	17	84814626	269.291
UniProtKB:P61966	AP-1 complex subunit sigma-1A OS=Homo sapiens GN=AP1S1 PE=1 SV=1	303.327	10.13	1	1	1	3	74224684	18.7206
UniProtKB:Q15287	RNA-binding protein with serine-rich domain 1 OS=Homo sapiens GN=RNPS1 PE=1 SV=1	303.24	23.28	1	5	5	10	4.97522e+08	34.1877
UniProtKB:Q7Z460	CLIP-associating protein 1 OS=Homo sapiens GN=CLASP1 PE=1 SV=1	302.992	5.79	1	3	6	12	1.41284e+08	169.346
UniProtKB:Q9NRR5	Ubiquilin-4 OS=Homo sapiens GN=UBQLN4 PE=1 SV=2	302.752	15.64	1	3	6	12	1.96014e+08	63.8124
UniProtKB:Q9Y312	Uncharacterized protein C20orf4 OS=Homo sapiens GN=C20orf4 PE=1 SV=2	302.55	19.79	1	5	5	7	8.87886e+07	43.4441
UniProtKB:O75663	TIP41-like protein OS=Homo sapiens GN=TIPRL PE=1 SV=2	302.013	33.82	1	6	6	16	2.01788e+08	31.4237
UniProtKB:Q14558	Phosphoribosyl pyrophosphate synthase-associated protein 1 OS=Homo sapiens GN=PRPSAP1 PE=1 SV=2	301.67	16.57	1	4	4	9	8.08948e+07	39.3686
UniProtKB:CON_P05787	Tax_Id=9606 Gene_Symbol=KRT8 Keratin, type II cytoskeletal 8	300.983	19.25	1	2	10	20	1.07517e+09	53.6711
UniProtKB:P62834	Ras-related protein Rap-1A OS=Homo sapiens GN=RAP1A PE=1 SV=1	300.699	38.59	1	2	6	13	5.67939e+08	20.9737
UniProtKB:P12955	Xaa-Pro dipeptidase OS=Homo sapiens GN=PEPD PE=1 SV=3	300.552	17.04	1	6	6	11	1.31678e+09	54.5129
UniProtKB:P46926	Glucosamine-6-phosphate isomerase 1 OS=Homo sapiens GN=GNPDA1 PE=1 SV=1	300.393	36.33	1	5	7	12	3.70314e+08	32.6476
UniProtKB:P08559	Pyruvate dehydrogenase E1 component subunit alpha, somatic form, mitochondrial OS=Homo sapiens GN=PDHA1 PE=1 SV=3	299.531	19.23	1	6	8	17	1.48463e+08	43.2676
UniProtKB:P56545	C-terminal-binding protein 2 OS=Homo sapiens GN=CTBP2 PE=1 SV=1	299.513	19.1	1	4	7	17	3.30549e+08	48.9141
UniProtKB:Q8WXI9	Transcriptional repressor p66-beta OS=Homo sapiens GN=GATAD2B PE=1 SV=1	299.51	14.5	1	6	7	13	8.80004e+07	65.22
UniProtKB:Q6NVV1	Putative 60S ribosomal protein L13a-like MGC87657 OS=Homo sapiens PE=5 SV=1	299.22	29.41	1	0	3	11	1.09544e+09	12.1269
UniProtKB:O14907	Tax1-binding protein 3 OS=Homo sapiens GN=TAX1BP3 PE=1 SV=2	298.983	13.71	1	1	1	3	190181490	13.7261
UniProtKB:P35222	Catenin beta-1 OS=Homo sapiens GN=CTNNB1 PE=1 SV=1	298.721	14.6	1	6	8	13	1.99641e+08	85.4422
UniProtKB:Q9UKN8	General transcription factor 3C polypeptide 4 OS=Homo sapiens GN=GTF3C4 PE=1 SV=2	298.328	15.69	1	7	7	11	1.19026e+08	91.9235
UniProtKB:O94979	Protein transport protein Sec31A OS=Homo sapiens GN=SEC31A PE=1 SV=3	297.78	12.54	1	13	13	20	1.84263e+08	132.931
UniProtKB:Q02978	Mitochondrial 2-oxoglutarate/malate carrier protein OS=Homo sapiens GN=SLC25A11 PE=1 SV=3	297.76	20.06	1	5	5	10	9.16019e+07	34.0399
UniProtKB:O15344	Midline-1 OS=Homo sapiens GN=MID1 PE=1 SV=1	297.739	10.19	1	5	5	8	3.51644e+07	75.2026
UniProtKB:O00178	GTP-binding protein 1 OS=Homo sapiens GN=GTPBP1 PE=1 SV=3	297.603	13.45	1	6	6	11	1.43076e+08	72.408
UniProtKB:Q99700	Ataxin-2 OS=Homo sapiens GN=ATXN2 PE=1 SV=2	297.128	6.09	1	5	5	10	7.16754e+07	140.196
UniProtKB:Q12904	Aminoacyl tRNA synthase complex-interacting multifunctional protein 1 OS=Homo sapiens GN=AIMP1 PE=1 SV=2	297.049	31.41	1	8	8	16	3.62374e+08	34.3311
UniProtKB:Q9UBB6	Neurochondrin OS=Homo sapiens GN=NCDN PE=1 SV=1	296.905	15.36	1	9	9	17	2.00346e+08	78.8136
UniProtKB:Q8NCM8	Cytoplasmic dynein 2 heavy chain 1 OS=Homo sapiens GN=DYNC2H1 PE=1 SV=4	296.872	3.58	1	11	11	15	66518946	492.311
UniProtKB:Q9UBF6	RING-box protein 2 OS=Homo sapiens GN=RNF7 PE=1 SV=1	296.847	30.09	1	2	2	6	48775158	12.6746
UniProtKB:P05141	ADP/ATP translocase 2 OS=Homo sapiens GN=SLC25A5 PE=1 SV=6	296.65	34.9	1	4	11	25	638136682	32.8742
UniProtKB:Q12849	G-rich sequence factor 1 OS=Homo sapiens GN=GRSF1 PE=1 SV=3	296.215	23.75	1	8	8	13	1.01708e+08	53.0926
UniProtKB:Q01581	Hydroxymethylglutaryl-CoA synthase, cytoplasmic OS=Homo sapiens GN=HMGCS1 PE=1 SV=2	296.154	21.73	1	8	9	14	1.98495e+08	57.2574
UniProtKB:Q92990	Glomulin OS=Homo sapiens GN=GLMN PE=1 SV=2	295.859	12.29	1	6	6	10	102275341	68.1646
UniProtKB:O60232	Sjoegren syndrome/scleroderma autoantigen 1 OS=Homo sapiens GN=SSSCA1 PE=1 SV=1	295.24	27.64	1	4	4	8	1.0763e+08	21.4607
UniProtKB:Q9H2P0	Activity-dependent neuroprotector homeobox protein OS=Homo sapiens GN=ADNP PE=1 SV=1	294.975	6.08	1	4	4	8	3.05353e+07	123.485
UniProtKB:Q9BTD8	RNA-binding protein 42 OS=Homo sapiens GN=RBM42 PE=1 SV=1	294.75	11.46	1	3	3	5	9.13658e+07	50.382
UniProtKB:Q15555	Microtubule-associated protein RP/EB family member 2 OS=Homo sapiens GN=MAPRE2 PE=1 SV=1	294.697	14.07	1	4	4	12	4.51652e+08	37.0082
UniProtKB:P47755	F-actin-capping protein subunit alpha-2 OS=Homo sapiens GN=CAPZA2 PE=1 SV=3	294.654	45.45	1	7	8	13	528872524	32.9286
UniProtKB:Q9NZZ3	Charged multivesicular body protein 5 OS=Homo sapiens GN=CHMP5 PE=1 SV=1	294.61	16.89	1	2	2	7	1.12045e+08	24.5554
UniProtKB:Q96T37	Putative RNA-binding protein 15 OS=Homo sapiens GN=RBM15 PE=1 SV=2	294.573	10.13	1	6	6	12	1.29756e+08	107.124
UniProtKB:Q8TCG1	Protein CIP2A OS=Homo sapiens GN=KIAA1524 PE=1 SV=2	294.456	11.16	1	8	8	10	201556141	102.121
UniProtKB:Q16637	Survival motor neuron protein OS=Homo sapiens GN=SMN1 PE=1 SV=1	294.405	30.27	1	5	5	8	1.18308e+08	31.8285
UniProtKB:P62913	60S ribosomal protein L11 OS=Homo sapiens GN=RPL11 PE=1 SV=2	294.252	24.16	1	4	4	11	2.02077e+09	20.2396
UniProtKB:P19388	DNA-directed RNA polymerases I, II, and III subunit RPABC1 OS=Homo sapiens GN=POLR2E PE=1 SV=4	294.065	33.81	1	5	5	8	2.29353e+08	24.5357
UniProtKB:P11171	Protein 4.1 OS=Homo sapiens GN=EPB41 PE=1 SV=4	294.045	11.46	1	8	8	12	1.13858e+08	96.9573
UniProtKB:O43290	U4/U6.U5 tri-snRNP-associated protein 1 OS=Homo sapiens GN=SART1 PE=1 SV=1	294.04	8.38	1	4	4	7	5.93472e+07	90.2003
UniProtKB:P78406	mRNA export factor OS=Homo sapiens GN=RAE1 PE=1 SV=1	293.814	33.15	1	8	8	14	2.59465e+08	40.9419
UniProtKB:P40616	ADP-ribosylation factor-like protein 1 OS=Homo sapiens GN=ARL1 PE=1 SV=1	292.895	25.97	1	3	3	9	1.31111e+08	20.4044
UniProtKB:P35658	Nuclear pore complex protein Nup214 OS=Homo sapiens GN=NUP214 PE=1 SV=2	292.04	9.14	1	12	12	19	1.03312e+08	213.488
UniProtKB:Q92901	60S ribosomal protein L3-like OS=Homo sapiens GN=RPL3L PE=1 SV=3	291.893	4.42	1	0	2	9	1.66428e+09	46.2669
UniProtKB:P55327	Tumor protein D52 OS=Homo sapiens GN=TPD52 PE=1 SV=2	291.852	38.84	1	6	6	13	303107011	24.3122
UniProtKB:Q9HC35	Echinoderm microtubule-associated protein-like 4 OS=Homo sapiens GN=EML4 PE=1 SV=3	291.803	10.19	1	9	9	14	8.57077e+07	108.848
UniProtKB:Q16512	Serine/threonine-protein kinase N1 OS=Homo sapiens GN=PKN1 PE=1 SV=2	291.721	5.31	1	4	4	8	29190040	103.868
UniProtKB:Q9H2J4	Phosducin-like protein 3 OS=Homo sapiens GN=PDCL3 PE=1 SV=1	291.561	30.54	1	5	5	9	1.27484e+08	27.5971
UniProtKB:Q4VXU2	Polyadenylate-binding protein 1-like OS=Homo sapiens GN=PABPC1L PE=2 SV=1	291.517	7.17	1	0	4	11	1.62926e+09	68.3485
UniProtKB:Q8IWJ2	GRIP and coiled-coil domain-containing protein 2 OS=Homo sapiens GN=GCC2 PE=1 SV=4	290.914	4.51	1	6	6	11	2.69786e+07	195.789
UniProtKB:P50914	60S ribosomal protein L14 OS=Homo sapiens GN=RPL14 PE=1 SV=4	290.781	13.95	1	3	3	10	1337831839	23.417
UniProtKB:Q9NW64	Pre-mRNA-splicing factor RBM22 OS=Homo sapiens GN=RBM22 PE=1 SV=1	290.381	19.05	1	7	7	16	1.99216e+08	46.8654
UniProtKB:Q4G0J3	La-related protein 7 OS=Homo sapiens GN=LARP7 PE=1 SV=1	289.841	12.37	1	5	5	9	6.23922e+07	66.8574
UniProtKB:P11802	Cell division protein kinase 4 OS=Homo sapiens GN=CDK4 PE=1 SV=2	289.543	28.38	1	6	6	12	209710018	33.7084
UniProtKB:Q9Y3B4	Pre-mRNA branch site protein p14 OS=Homo sapiens GN=SF3B14 PE=1 SV=1	288.797	39.2	1	4	4	9	2.95979e+08	14.5756
UniProtKB:Q9Y333	U6 snRNA-associated Sm-like protein LSm2 OS=Homo sapiens GN=LSM2 PE=1 SV=1	288.528	52.63	1	4	4	9	6.64788e+08	10.8276
UniProtKB:P11279	Lysosome-associated membrane glycoprotein 1 OS=Homo sapiens GN=LAMP1 PE=1 SV=3	288.045	13.43	1	6	6	9	3.1467e+08	44.8538
UniProtKB:P49354	Protein farnesyltransferase/geranylgeranyltransferase type-1 subunit alpha OS=Homo sapiens GN=FNTA PE=1 SV=1	287.932	19	1	6	6	12	1.01385e+08	44.3811
UniProtKB:Q53EL6	Programmed cell death protein 4 OS=Homo sapiens GN=PDCD4 PE=1 SV=1	287.67	15.78	1	5	5	8	1.1229e+08	51.689
UniProtKB:P63165	Small ubiquitin-related modifier 1 OS=Homo sapiens GN=SUMO1 PE=1 SV=1	287.223	43.56	1	5	5	16	4.30864e+08	11.5497
UniProtKB:Q6NXE6	Armadillo repeat-containing protein 6 OS=Homo sapiens GN=ARMC6 PE=1 SV=2	286.973	12.18	1	4	4	6	5.76686e+08	54.1074
UniProtKB:O94966	Ubiquitin carboxyl-terminal hydrolase 19 OS=Homo sapiens GN=USP19 PE=1 SV=2	286.935	9.18	1	6	6	11	1.1896e+08	145.559
UniProtKB:Q9H4A3	Serine/threonine-protein kinase WNK1 OS=Homo sapiens GN=WNK1 PE=1 SV=2	286.804	2.81	1	4	6	11	6.42828e+07	250.64
UniProtKB:Q8WUH6	UPF0444 transmembrane protein C12orf23 OS=Homo sapiens GN=C12orf23 PE=1 SV=1	286.682	55.17	1	4	4	9	1.66479e+08	11.7411
UniProtKB:Q99598	Translin-associated protein X OS=Homo sapiens GN=TSNAX PE=1 SV=1	286.13	37.59	1	8	8	10	2.6395e+08	33.0917
UniProtKB:P15104	Glutamine synthetase OS=Homo sapiens GN=GLUL PE=1 SV=4	285.448	26.27	1	9	9	17	2.52197e+08	42.0373
UniProtKB:Q14669	Probable E3 ubiquitin-protein ligase TRIP12 OS=Homo sapiens GN=TRIP12 PE=1 SV=1	284.5	3.46	1	5	5	10	4.22469e+07	220.296
UniProtKB:Q86UV5	Ubiquitin carboxyl-terminal hydrolase 48 OS=Homo sapiens GN=USP48 PE=1 SV=1	284.43	8.7	1	6	6	8	1.21411e+08	118.956
UniProtKB:O75607	Nucleoplasmin-3 OS=Homo sapiens GN=NPM3 PE=1 SV=3	284.32	60.11	1	6	6	11	5.07647e+08	19.3314
UniProtKB:Q9NX63	Coiled-coil-helix-coiled-coil-helix domain-containing protein 3, mitochondrial OS=Homo sapiens GN=CHCHD3 PE=1 SV=1	284.027	24.23	1	6	6	11	3.55364e+08	26.1362
UniProtKB:Q9BS26	Endoplasmic reticulum resident protein 44 OS=Homo sapiens GN=ERP44 PE=1 SV=1	283.974	25.86	1	8	8	13	2.22485e+08	46.9414
UniProtKB:Q6P996	Pyridoxal-dependent decarboxylase domain-containing protein 1 OS=Homo sapiens GN=PDXDC1 PE=1 SV=2	283.963	16.5	1	6	8	14	7.4154e+07	86.6523
UniProtKB:O96019	Actin-like protein 6A OS=Homo sapiens GN=ACTL6A PE=1 SV=1	283.743	27.51	1	6	8	13	1.90187e+08	47.4303
UniProtKB:P13796	Plastin-2 OS=Homo sapiens GN=LCP1 PE=1 SV=6	283.212	7.66	1	0	5	17	1.8153e+09	70.2439
UniProtKB:O75367	Core histone macro-H2A.1 OS=Homo sapiens GN=H2AFY PE=1 SV=4	282.54	25.54	1	6	7	12	3.87897e+08	39.5925
UniProtKB:Q9BV38	WD repeat-containing protein 18 OS=Homo sapiens GN=WDR18 PE=1 SV=2	282.268	27.31	1	8	8	13	1.46794e+08	47.375
UniProtKB:O75150	E3 ubiquitin-protein ligase BRE1B OS=Homo sapiens GN=RNF40 PE=1 SV=4	282.108	13.89	1	9	10	13	1.2319e+08	113.581
UniProtKB:Q9Y4E8	Ubiquitin carboxyl-terminal hydrolase 15 OS=Homo sapiens GN=USP15 PE=1 SV=3	282.035	9.99	1	6	7	13	7.4944e+07	112.348
UniProtKB:P61326	Protein mago nashi homolog OS=Homo sapiens GN=MAGOH PE=1 SV=1	281.823	39.04	1	1	6	17	4.04778e+08	17.1528
UniProtKB:Q15024	Exosome complex exonuclease RRP42 OS=Homo sapiens GN=EXOSC7 PE=1 SV=2	281.678	24.4	1	6	6	12	1.88274e+08	31.8151
UniProtKB:P46108	Adapter molecule crk OS=Homo sapiens GN=CRK PE=1 SV=2	279.5	20.72	1	4	4	7	1.29506e+08	33.81
UniProtKB:O60306	Intron-binding protein aquarius OS=Homo sapiens GN=AQR PE=1 SV=4	279.095	7	1	8	8	13	1.14035e+08	171.186
UniProtKB:Q53GS9	U4/U6.U5 tri-snRNP-associated protein 2 OS=Homo sapiens GN=USP39 PE=1 SV=2	278.96	18.05	1	7	7	11	2.00294e+08	65.3397
UniProtKB:P08237	6-phosphofructokinase, muscle type OS=Homo sapiens GN=PFKM PE=1 SV=2	278.948	15.38	1	8	9	12	7.4039e+07	85.1284
UniProtKB:P14324	Farnesyl pyrophosphate synthase OS=Homo sapiens GN=FDPS PE=1 SV=4	278.203	20.29	1	7	7	15	3.14831e+08	48.2446
UniProtKB:Q96A72	Protein mago nashi homolog 2 OS=Homo sapiens GN=MAGOHB PE=1 SV=1	278.003	39.19	1	1	6	17	4.04778e+08	17.2649
UniProtKB:Q92896	Golgi apparatus protein 1 OS=Homo sapiens GN=GLG1 PE=1 SV=2	277.955	3.05	1	3	3	8	2.81044e+07	134.464
UniProtKB:O60784	Target of Myb protein 1 OS=Homo sapiens GN=TOM1 PE=1 SV=2	277.886	11.38	1	3	3	7	1.0112e+08	53.7849
UniProtKB:Q8NFH4	Nucleoporin Nup37 OS=Homo sapiens GN=NUP37 PE=1 SV=1	277.58	18.4	1	4	4	8	1.32917e+08	36.684
UniProtKB:Q9NY61	Protein AATF OS=Homo sapiens GN=AATF PE=1 SV=1	276.96	13.93	1	4	4	8	1.5166e+08	63.0943
UniProtKB:P63027	Vesicle-associated membrane protein 2 OS=Homo sapiens GN=VAMP2 PE=1 SV=3	276.859	35.34	1	2	4	7	2.08257e+08	12.6547
UniProtKB:Q92552	28S ribosomal protein S27, mitochondrial OS=Homo sapiens GN=MRPS27 PE=1 SV=3	276.75	11.35	1	3	3	10	8.07797e+07	47.5814
UniProtKB:Q96I99	Succinyl-CoA ligase [GDP-forming] subunit beta, mitochondrial OS=Homo sapiens GN=SUCLG2 PE=1 SV=2	276.65	14.58	1	5	5	8	7.35579e+07	46.4814
UniProtKB:Q9BU89	Deoxyhypusine hydroxylase OS=Homo sapiens GN=DOHH PE=1 SV=1	276.464	24.5	1	4	4	9	1.41097e+08	32.8835
UniProtKB:Q13045	Protein flightless-1 homolog OS=Homo sapiens GN=FLII PE=1 SV=2	276.377	8.04	1	7	7	11	1.148e+08	144.66
UniProtKB:Q68EM7	Rho GTPase-activating protein 17 OS=Homo sapiens GN=ARHGAP17 PE=1 SV=1	276.269	7.49	1	3	4	6	8.073e+07	95.3773
UniProtKB:P42566	Epidermal growth factor receptor substrate 15 OS=Homo sapiens GN=EPS15 PE=1 SV=2	276.238	6.25	1	4	4	6	3.29914e+07	98.5948
UniProtKB:Q9UGP4	LIM domain-containing protein 1 OS=Homo sapiens GN=LIMD1 PE=1 SV=1	275.96	5.92	1	2	2	4	3.69903e+07	72.1439
UniProtKB:Q00535	Cell division protein kinase 5 OS=Homo sapiens GN=CDK5 PE=1 SV=3	275.786	41.78	1	9	9	19	1.91393e+08	33.2832
UniProtKB:Q9NS86	LanC-like protein 2 OS=Homo sapiens GN=LANCL2 PE=1 SV=1	275.55	10.89	1	3	3	6	9.69392e+07	50.8214
UniProtKB:Q15067	Peroxisomal acyl-coenzyme A oxidase 1 OS=Homo sapiens GN=ACOX1 PE=1 SV=3	275.5	7.58	1	4	4	8	6.35224e+07	74.3762
UniProtKB:Q96D46	60S ribosomal export protein NMD3 OS=Homo sapiens GN=NMD3 PE=1 SV=1	275.36	12.52	1	5	5	9	5.49968e+07	57.5659
UniProtKB:Q9NX55	Huntingtin-interacting protein K OS=Homo sapiens GN=HYPK PE=1 SV=1	275.235	32	1	5	5	8	1.88151e+08	19.3198
UniProtKB:Q00688	Peptidyl-prolyl cis-trans isomerase FKBP3 OS=Homo sapiens GN=FKBP3 PE=1 SV=1	274.867	32.14	1	6	6	16	7.43907e+08	25.1613
UniProtKB:Q96T76	MMS19 nucleotide excision repair protein homolog OS=Homo sapiens GN=MMS19 PE=1 SV=2	274.76	8.74	1	7	7	11	8.52219e+07	113.217
UniProtKB:P11413	Glucose-6-phosphate 1-dehydrogenase OS=Homo sapiens GN=G6PD PE=1 SV=4	274.485	25.83	1	12	12	22	3.5927e+08	59.219
UniProtKB:O75526	RNA-binding motif protein, X-linked-like-2 OS=Homo sapiens GN=RBMXL2 PE=1 SV=3	273.763	8.16	1	0	4	13	1.4666e+09	42.7882
UniProtKB:P55145	Mesencephalic astrocyte-derived neurotrophic factor OS=Homo sapiens GN=MANF PE=1 SV=2	273.39	29.05	1	4	4	11	2.373e+08	20.2436
UniProtKB:Q96AT9	Ribulose-phosphate 3-epimerase OS=Homo sapiens GN=RPE PE=1 SV=1	273.126	11.4	1	2	2	7	2.34205e+08	24.9113
UniProtKB:Q8IVD9	NudC domain-containing protein 3 OS=Homo sapiens GN=NUDCD3 PE=1 SV=3	273.012	14.68	1	4	4	10	4.44835e+07	40.7967
UniProtKB:Q9P2R3	Ankyrin repeat and FYVE domain-containing protein 1 OS=Homo sapiens GN=ANKFY1 PE=1 SV=2	272.57	10.78	1	8	8	10	8.45376e+07	128.318
UniProtKB:Q9NVD7	Alpha-parvin OS=Homo sapiens GN=PARVA PE=1 SV=1	272.25	13.71	1	2	4	10	48156158	42.2174
UniProtKB:Q16658	Fascin OS=Homo sapiens GN=FSCN1 PE=1 SV=3	272.118	23.12	1	10	10	16	2.21393e+08	54.4961
UniProtKB:Q92905	COP9 signalosome complex subunit 5 OS=Homo sapiens GN=COPS5 PE=1 SV=4	272.115	26.95	1	8	8	18	4.4604e+08	37.5547
UniProtKB:O95817	BAG family molecular chaperone regulator 3 OS=Homo sapiens GN=BAG3 PE=1 SV=3	271.96	16.17	1	7	7	11	94679869	61.5569
UniProtKB:Q7RTV0	PHD finger-like domain-containing protein 5A OS=Homo sapiens GN=PHF5A PE=1 SV=1	271.768	48.18	1	6	6	12	2.65131e+08	12.397
UniProtKB:Q8WTT2	Nucleolar complex protein 3 homolog OS=Homo sapiens GN=NOC3L PE=1 SV=1	271.491	11.5	1	6	6	11	2.15894e+08	92.4896
UniProtKB:CON_Q03247	(Bos taurus) Apolipoprotein E precursor	271.285	25.95	1	5	6	11	3.33088e+08	35.9575
UniProtKB:P29144	Tripeptidyl-peptidase 2 OS=Homo sapiens GN=TPP2 PE=1 SV=4	270.579	12.89	1	11	11	15	9.52354e+07	138.263
UniProtKB:Q5T1M5	FK506-binding protein 15 OS=Homo sapiens GN=FKBP15 PE=1 SV=2	270.439	6.07	1	5	5	7	4.84861e+07	133.547
UniProtKB:Q641Q2	WASH complex subunit FAM21A OS=Homo sapiens GN=FAM21A PE=1 SV=3	270.39	4.92	1	0	4	6	2.82721e+07	147.095
UniProtKB:Q5SNT6	WASH complex subunit FAM21B OS=Homo sapiens GN=FAM21B PE=1 SV=2	270.39	5.27	1	0	4	6	2.82721e+07	136.887
UniProtKB:Q86UP2	Kinectin OS=Homo sapiens GN=KTN1 PE=1 SV=1	270.354	10.46	1	11	11	15	9.64172e+07	156.179
UniProtKB:P60604	Ubiquitin-conjugating enzyme E2 G2 OS=Homo sapiens GN=UBE2G2 PE=1 SV=1	270.3	14.55	1	1	1	4	1.76005e+08	18.5541
UniProtKB:Q9NRY5	Protein FAM114A2 OS=Homo sapiens GN=FAM114A2 PE=1 SV=4	270.271	21.58	1	6	6	9	7.70516e+07	55.4342
UniProtKB:O00487	26S proteasome non-ATPase regulatory subunit 14 OS=Homo sapiens GN=PSMD14 PE=1 SV=1	270.135	36.77	1	8	8	16	3.27585e+08	34.5546
UniProtKB:O00506	Serine/threonine-protein kinase 25 OS=Homo sapiens GN=STK25 PE=1 SV=1	270.068	11.97	1	0	4	9	9.63138e+07	48.0818
UniProtKB:P57740	Nuclear pore complex protein Nup107 OS=Homo sapiens GN=NUP107 PE=1 SV=1	269.69	11.03	1	8	8	14	8.75246e+07	106.307
UniProtKB:P30419	Glycylpeptide N-tetradecanoyltransferase 1 OS=Homo sapiens GN=NMT1 PE=1 SV=2	269.649	13.31	1	4	5	10	2.82718e+08	56.7699
UniProtKB:P49959	Double-strand break repair protein MRE11A OS=Homo sapiens GN=MRE11A PE=1 SV=3	269.59	17.09	1	9	9	11	1.67271e+08	80.5433
UniProtKB:Q9NW13	RNA-binding protein 28 OS=Homo sapiens GN=RBM28 PE=1 SV=3	269.386	11.2	1	7	7	14	6.88986e+07	85.6847
UniProtKB:Q9BV44	THUMP domain-containing protein 3 OS=Homo sapiens GN=THUMPD3 PE=1 SV=1	269.334	12.62	1	4	4	7	3.43978e+07	56.9668
UniProtKB:Q9UQ16	Dynamin-3 OS=Homo sapiens GN=DNM3 PE=1 SV=4	269.31	8.17	1	2	6	13	2.98413e+08	97.685
UniProtKB:O43172	U4/U6 small nuclear ribonucleoprotein Prp4 OS=Homo sapiens GN=PRPF4 PE=1 SV=2	269.303	22.03	1	9	9	15	1.35372e+08	58.4124
UniProtKB:Q9Y5Z4	Heme-binding protein 2 OS=Homo sapiens GN=HEBP2 PE=1 SV=1	269.17	42.44	1	7	7	14	2.12803e+08	22.8612
UniProtKB:P54646	5'-AMP-activated protein kinase catalytic subunit alpha-2 OS=Homo sapiens GN=PRKAA2 PE=1 SV=2	269.14	7.97	1	1	3	6	7.89423e+07	62.2796
UniProtKB:Q13033	Striatin-3 OS=Homo sapiens GN=STRN3 PE=1 SV=3	269.091	14.55	1	7	8	12	6.98909e+07	87.1553
UniProtKB:P49454	Centromere protein F OS=Homo sapiens GN=CENPF PE=1 SV=2	268.874	6.57	1	16	16	17	3.17242e+07	367.537
UniProtKB:P09884	DNA polymerase alpha catalytic subunit OS=Homo sapiens GN=POLA1 PE=1 SV=2	268.27	7.25	1	8	8	12	5.03116e+07	165.807
[truncated: 2,872 more rows]

## Sheet: 1D 3 times 180 min Phospho Pept
Mascot Score ≥ 20	Search Engine Rank=1
[truncated: 165 more rows]

## Sheet: 1D 3x180min  NTerm Acetyl Pept
Mascot Score ≥ 20	Search Engine Rank=1
[truncated: 632 more rows]

[truncated: 4 more sheets: 1D 3 times 600 min Peptides, 1D 3 times 600 min Proteins, 1D 3 times 600 min Phospho Pept, 1D 3x600min  NTerm Acetyl Pept]
