# Supplementary material for: Characterization and usage of the EASY-spray technology as part of an online 2D SCX-RP ultra-high pressure system
Source: Royal Society of Chemistry journal article supplement (doi:10.1039/c4an01568a), 2014-01-01
Supplement: c4an01568a3.xlsx [file c4an01568a3.xlsx]

## Sheet: 2D short Total Unique Peptides
Mascot Score ≥ 20	Search Engine Rank=1
Peptide Rank = 1	Confidence= High
Sequence	Protein Group Accessions	Modifications	Isoform Confidence Probability	phosphoRS Site Probabilities	Area	q-Value	PEP	IonScore	Exp Value	Charge	m/z [Da]
LVQDVANNTNEEAGDGTTTATVLAR	UniProtKB:P10809				27883292022	0	6.05402e-09	217.83	7.77109e-20	2	1280.63
GGGGGGYGSGGSSYGSGGGSYGSGGGGGGGR	UniProtKB:CON_P04264;UniProtKB:P04264				847653462	0	1.40267e-10	204.53	1.56594e-18	2	1192.48
NMGGPYGGGNYGPGGSGGSGGYGGR	UniProtKB:P22626				29261223680	0	1.313e-09	199.44	5.19327e-18	2	1095.46
VAAAPDEDLDGDDEDDAEDENNIDNR	UniProtKB:Q9BXV9				496837668	0	8.74293e-08	193.55	2.30875e-17	2	1416.58
NEGQLNGETNTPIEGNQAGDAAASAR	UniProtKB:P18583				364806984	0	1.00558e-08	192.55	3.25065e-17	2	1293.1
AADSQNSGEGNTGAAESSFSQEVSR	UniProtKB:P12270				1.22824e+09	0	3.87911e-09	188.53	7.93291e-17	2	1243.54
IADSIGcSTNNILFLTDVTR	UniProtKB:Q9UHY7	C7(Carbamidomethyl)			1958551614	0	2.80171e-07	186.65	7.98259e-17	2	1105.57
GGMNDDEDFYDEDMGDGGGGSYR	UniProtKB:Q9UPT8				125465682	0	3.9249e-08	185.68	6.43136e-17	2	1229.94
TIQNSSVSPTSSSSSSSSTGETQTQSSSR	UniProtKB:Q7Z417				0	0	2.35599e-08	185.56	1.77207e-16	2	1446.66
TMMAcGGSIQTSVNALSADVLGR	UniProtKB:Q99832	C5(Carbamidomethyl)			1622620332	0	5.04597e-07	184.99	1.5431e-16	2	1170.07
EQFGNNPFSSLAGNSDSSSSQPLR	UniProtKB:Q9NRR5				627853320	0	3.48908e-08	182.8	3.10109e-16	2	1263.58
ESFEGQMTEDNIEVGIcNEAGFR	UniProtKB:P25787	C17(Carbamidomethyl)			402272016	0	2.4986e-08	182.78	3.07955e-16	2	1316.57
GLVEPVDVVDNADGTQTVNYVPSR	UniProtKB:P21333				1944879110	0	1.74575e-08	182.64	2.44346e-16	2	1272.64
NmGGPYGGGNYGPGGSGGSGGYGGR	UniProtKB:P22626	M2(Oxidation)			6810292844	0	2.61899e-09	181.78	2.8906e-16	2	1103.46
GFGDGYNGYGGGPGGGNFGGSPGYGGGR	UniProtKB:P22626				5415190480	0	8.68387e-09	179.89	5.34057e-16	2	1248.03
QTTVSNSQQAYQEAFEISK	UniProtKB:P31946				606324204	0	4.12298e-07	178.34	7.34166e-16	2	1080.02
NMITGTSQADcAVLIVAAGVGEFEAGISK	UniProtKB:P68104;UniProtKB:Q05639;UniProtKB:Q5VTE0	C11(Carbamidomethyl)			289740128	0	9.4647e-10	176.63	8.18891e-16	2	1455.24
SGGGTGEEPGSQGLNGEAGPEDSTR	UniProtKB:O15355				1474126470	0	3.78323e-07	176.03	1.37814e-15	2	1173.51
DGVADVSIEDSVISLSGDHcIIGR	UniProtKB:P00441	C20(Carbamidomethyl)			41346375280	0	3.33817e-08	175.51	1.412e-15	2	1257.61
SVGDNSSDLSNVAVIDGNR	UniProtKB:O95163				873808960	0	2.78513e-06	175.46	1.29793e-15	2	959.962
aETLSGLGDSGAAGAAALSSASSETGTR	UniProtKB:Q15424	N-Term(Acetyl)			776931024	0	1.25669e-09	174.93	1.73779e-15	2	1269.11
LNEDmAcSVAGITSDANVLTNELR	UniProtKB:P25789	M5(Oxidation); C7(Carbamidomethyl)			287517138	0	3.98298e-07	174.87	1.78216e-15	2	1305.12
GALETDNSNSSAQVSTVGQTSR	UniProtKB:Q9UPQ9				178746034	0	3.22591e-07	173.18	2.4655e-15	2	1105.02
LQEALDAEMLEDEAGGGGAGPGGAcK	UniProtKB:Q1KMD3	C25(Carbamidomethyl)			1571240738	0	1.68518e-10	172.76	3.12263e-15	2	1252.06
LLESFETMASQTNLVDLDLGGK	UniProtKB:Q15021				985800251	0	1.337e-07	172.42	2.41033e-15	2	1191.1
LLEDGEDFNLGDALDSSNSMQTIQK	UniProtKB:P05783				1.61904e+08	0	7.66858e-08	172.34	3.47412e-15	2	1370.64
RAEISNAIDQYVTGTIGEDEDLIK	UniProtKB:P31939				5126240534	0	1.48696e-08	171.49	2.8557e-15	2	1325.67
AIFTTGQGASAVGLTAYVQR	UniProtKB:P49736				911775272	0	2.58818e-06	171.09	1.92408e-15	2	1006.04
TGTDSNSTESSETSTGSLcK	UniProtKB:Q8N3X1	C19(Carbamidomethyl)			3.1625e+08	0	6.75777e-07	171.01	3.5191e-15	2	1024.94
TsSFAEPGGGGGGGGGGPGGSASGPGGTGGGK	UniProtKB:P49840	S2(Phospho)	0.0125105	T(1): 1.3; S(2): 1.3; S(3): 97.5; S(21): 0.0; S(23): 0.0; T(28): 0.0	9.79477e+07	0	1.51627e-08	170.74	4.1783e-15	2	1257.02
VAGTGEGGLEEMVEELNSGK	UniProtKB:Q9UJU6				4174372406	0	7.45288e-07	170.43	4.37605e-15	2	1003.47
GWTGQESLSDSDPEMWELLQR	UniProtKB:P34897				303792612	0	1.2099e-06	170.1	5.82678e-15	2	1232.55
APNTPASGANGDGSMSQTQSGSTVK	UniProtKB:CON_P15636				39376531864	0	1.11612e-09	169.42	6.55498e-15	2	1175.54
GINSSNVENQLQATQAAR	UniProtKB:P52292				4836958168	0	1.43742e-05	169.37	4.34178e-15	2	950.985
EAPATQASSTTQLTDTQVLAAENK	UniProtKB:Q9UNF1				1869771672	0	1.83874e-07	168.59	5.68092e-15	2	1238.12
GLQVDLQSDGAAAEDIVASEQSLGQK	UniProtKB:P33991				1101757080	0	1.74355e-10	167.8	7.06154e-15	2	1315.16
APLATGEDDDDEVPDLVENFDEASK	UniProtKB:P20290				7865601832	0	9.27499e-10	167.62	1.05605e-14	2	1346.1
AAQYQVNQAAAAQAAATAAAMTQSAVK	UniProtKB:Q9NR56				449737324	0	1.36967e-08	166.76	7.70282e-15	2	1303.67
AQSSQDAVSSMNLFDLGGQYLR	UniProtKB:Q9UHX1				4322346780	0	1.67507e-07	166.74	1.14127e-14	2	1194.07
GAAAAAAASGAAGGGGGGAGAGAPGGGR	UniProtKB:Q68E01				1.44963e+09	0	6.54089e-09	166.05	1.13243e-14	2	976.971
TTTTNTQVEGDDEAAFLER	UniProtKB:Q05682				669365875	0	6.59052e-06	165.99	1.28603e-14	2	1049.48
ISYTDAEGNLGLLENVcDPSGK	UniProtKB:O75717	C17(Carbamidomethyl)			496691484	0	8.32516e-08	165.73	1.49194e-14	2	1176.55
QAFTDVATGSLGQGLGAAcGMAYTGK	UniProtKB:P29401	C19(Carbamidomethyl)			2571545965	0	5.97484e-09	165.72	1.44407e-14	2	1266.6
EMLNSVMQELEDYSEGGPLYK	UniProtKB:P49792				818855001	0	3.16507e-06	165.32	1.74996e-14	2	1216.55
TSSFAEPGGGGGGGGGGPGGSASGPGGTGGGK	UniProtKB:P49840				226531954	0	1.6254e-08	164.44	2.01478e-14	2	1217.04
DFSALESQLQDTQELLQEENR	UniProtKB:P35579				8208925171	0	2.32441e-07	163.44	2.38903e-14	2	1247.1
SVASNQSEMEFSSLQDMPK	UniProtKB:Q8N163				509525136	0	7.06135e-07	163.38	2.29714e-14	2	1057.97
ELDLSELDDPDSAYLQEAR	UniProtKB:Q9UER7				485047517	0	1.20841e-05	163.13	2.52834e-14	2	1090.01
NETVSSNSSNNTGNSTTETSSTLEVR	UniProtKB:Q96SI9				156568536	0	4.62323e-09	162.83	3.11127e-14	2	1358.62
ATPLSSTVTLSmSADVPLVVEYK	UniProtKB:P12004	M12(Oxidation)			306315107	0	3.31345e-07	162.77	1.43896e-14	2	1212.64
aAAAGDGGGEGGAGLGSAAGLGPGPGLR	UniProtKB:Q9HCJ3	N-Term(Acetyl)			233541954	0	1.73003e-08	162.73	2.35601e-14	2	1132.06
SSQTSGTNEQSSAIVSAR	UniProtKB:O60763				1981218172	0	4.86136e-05	162.7	2.39409e-14	2	905.431
NEEDAAELVALAQAVNAR	UniProtKB:P22314				16493276659	0	9.14531e-06	162.42	2.14369e-14	2	942.478
LASTNSSVLGADLPSSMK	UniProtKB:Q13428				3338481188	0	4.86136e-05	162.1	2.24626e-14	2	889.455
NVMSAFGLTDDQVSGPPSAPAEDR	UniProtKB:Q92734				2935718124	0	1.0055e-08	161.38	4.20075e-14	2	1231.07
LASVPAGGAVAVSAAPGSAAPAAGSAPAAAEEK	UniProtKB:P05387				76437968847	0	1.37575e-07	161.27	2.15238e-14	2	1387.73
HGGGGGGGSGPSAGSGGGGFGGSAAVAAATASGGK	UniProtKB:Q15022				125528164	0	8.37582e-07	161.14	4.58594e-14	3	877.405
LIEAEDNMNcQMSNITVTYR	UniProtKB:P62318	C10(Carbamidomethyl)			4401810335	0	8.72613e-07	160.55	5.13475e-14	2	1201.55
DLGLSESGEDVNAAILDESGK	UniProtKB:P13667				2846577304	0	8.76786e-07	160.54	4.31473e-14	2	1060.01
LYVTYFGGDEAAGLEADLEcK	UniProtKB:P49588	C20(Carbamidomethyl)			874139288	0	5.49987e-07	160.45	5.01364e-14	2	1161.04
VLGENYTLEDEEDSQIcTVGR	UniProtKB:Q15029	C17(Carbamidomethyl)			1255233012	0	1.04194e-06	160.39	5.22507e-14	2	1214.06
GGGGPGGGGPGGGSAGGPSQPPGGGGPGIR	UniProtKB:Q92945				4355530948	0	1.05269e-08	160.28	4.98642e-14	2	1135.54
QTTVSNSQQAYQEAFEISKK	UniProtKB:P31946				5697755576	0	1.66664e-05	159.57	5.15826e-14	2	1144.06
mAEESSSSSSSSSPTAATSQQQQLK	UniProtKB:Q13620	M1(Oxidation)			4.02229e+08	0	1.55559e-07	159.53	6.78104e-14	2	1280.57
mAEGGSGDVDDAGDcSGAR	UniProtKB:Q9UH62	M1(Oxidation); C15(Carbamidomethyl)			1.24418e+07	0	6.89431e-06	159.29	3.13538e-14	2	921.854
MAEESSSSSSSSSPTAATSQQQQLK	UniProtKB:Q13620				347878189	0	4.40144e-07	158.95	7.70851e-14	2	1272.58
DTNGENIAESLVAEGLATR	UniProtKB:Q7KZF4				1154244478	0	1.98461e-06	158.88	5.71646e-14	2	980.483
LSSVASNGGGAGGAGGGAAGDK	UniProtKB:Q96F45				90085924	0	2.09057e-07	158.85	5.52282e-14	2	859.41
NDATAQAFLAEASVMTQLR	UniProtKB:P41240				618264064	0	1.75154e-06	158.73	5.65611e-14	2	1019.01
VQENLLANGVDLVTYITR	UniProtKB:P21283				312628059	0	2.87416e-06	158.66	2.6378e-14	2	1009.55
GIVDQSQQAYQEAFEISK	UniProtKB:P63104				4671291188	0	5.86629e-07	158.5	6.37478e-14	2	1021
cELSSSVQTDINLPYLTMDSSGPK	UniProtKB:P38646	C1(Carbamidomethyl)			3.05454e+08	0	6.98583e-08	158.42	8.02706e-14	2	1321.62
GGSGGSYGGGGSGGGYGGGSGSR	UniProtKB:CON_P35527;UniProtKB:P35527				181048423	0	4.23697e-06	158.38	5.53618e-14	2	896.372
LEDGQTADGQTEEAAEPGEQLQTQK	UniProtKB:Q96G46				554560703	0	1.36368e-07	157.88	9.71794e-14	2	1337.11
ITLEGPTEDVNVAQEQIEGMVK	UniProtKB:Q00341				1041242332	0	9.30825e-07	157.8	6.90554e-14	2	1200.61
GTmDDISQEEGSSQGEDSVSGSQR	UniProtKB:Q14683	M3(Oxidation)			104934376	0	1.49686e-07	157.8	8.8207e-14	2	1251.52
aASAAAASAAAASAASGsPGPGEGSAGGEK	UniProtKB:Q13263	N-Term(Acetyl); S18(Phospho)	0.989389	S(3): 0.0; S(8): 0.0; S(13): 0.0; S(16): 0.0; S(18): 98.9; S(25): 1.1	1949992874	0	6.6296e-09	157.55	1.01907e-13	2	1255.05
TSTSNVEQYQAMVTSLEESLNK	UniProtKB:P12270				795637711	0	7.78397e-07	157.18	1.03274e-13	2	1230.09
ESALFSTELSVLHNFFSPSPK	UniProtKB:Q8WX92				1614099932	0	1.62902e-06	157.09	7.05907e-14	2	1169.1
ATFAGLYSLDVGEEGDQAIAEALAAPSR	UniProtKB:P48637				490986932	0	2.35231e-08	156.44	1.00725e-13	2	1411.7
ALNLFQGSVEDTTGSQSLAALLNK	UniProtKB:P43246				2681546052	0	3.37106e-07	156.31	6.62008e-14	2	1239.15
AVENPTATEIQDVcSAVGLNVFLEK	UniProtKB:P09132	C14(Carbamidomethyl)			493032600	0	2.27707e-08	156.26	1.00895e-13	2	1352.68
AIEDEGGNPDEIEITSEGNK	UniProtKB:Q15424				1151475716	0	3.97658e-07	156.1	1.27068e-13	2	1058.98
GIVDQSQQAYQEAFEISKK	UniProtKB:P63104				30404123348	0	9.53179e-07	155.99	1.01223e-13	2	1085.05
NDDDSSEAMNDILAQVATNTETSK	UniProtKB:O43747				204323451	0	6.23598e-07	155.75	1.5842e-13	2	1285.07
NLQTcMEVLEALYDGSLGDcK	UniProtKB:Q9BXJ9	C5(Carbamidomethyl); C20(Carbamidomethyl)			5209546260	0	3.11755e-07	155.7	1.57213e-13	2	1208.55
QEPLGSDSEGVNcLAYDEAIMAQQDR	UniProtKB:Q96FW1	C13(Carbamidomethyl)			1.79274e+08	0	4.06285e-08	155.54	1.84084e-13	2	1448.64
VVAPTISSPVcQEQLVEAGR	UniProtKB:Q9Y490	C11(Carbamidomethyl)			1903526166	0	1.47104e-05	155.46	8.46796e-14	2	1070.56
GVSGScNIDVVcPEGDGR	UniProtKB:CON_P15636	C6(Carbamidomethyl); C12(Carbamidomethyl)			1.59796e+09	0	4.79326e-06	155.02	1.37651e-13	2	939.405
DLYANTVLSGGTTMYPGIADR	UniProtKB:CON_P60712;UniProtKB:P63261				193475053326	0	5.18207e-06	154.59	1.65914e-13	2	1108.04
GSFAGIEDDADEALEISQAQLLFENR	UniProtKB:Q8IY81				3.92062e+08	0	6.19632e-08	154.56	1.90125e-13	2	1419.68
EQLDTETSTTQSETIQTAASLLASQK	UniProtKB:P51003				478652794	0	1.14114e-06	154.44	1.78921e-13	2	1391.18
DVVENGETADQTLSLMEQLR	UniProtKB:P47897				4.46214e+08	0	8.12613e-06	154.26	1.86193e-13	2	1124.54
SVSSQSSSSVSSQVTTAGSGK	UniProtKB:Q9NXV6				2.5767e+08	0	1.08985e-06	154.03	1.76867e-13	2	979.474
LcADSAcQQNTVTSSGDLVAK	UniProtKB:Q12802	C2(Carbamidomethyl); C7(Carbamidomethyl)			89031072	0	5.13193e-07	153.98	2.11431e-13	2	1113.02
GTITIQDTGIGMTQEELVSNLGTIAR	UniProtKB:Q12931				576753066	0	5.04209e-09	153.74	1.29886e-13	2	1359.71
LGDAVEQGVINNTVLGYFIGR	UniProtKB:P41250				2095413714	0	7.81572e-06	153.54	1.11842e-13	2	1118.1
MTDSFTEQADQVTAEVGK	UniProtKB:P09417				414936876	0	8.97888e-06	153.44	2.25226e-13	2	978.947
TDcSPIQFESAWALTNIASGTSEQTK	UniProtKB:P52292	C3(Carbamidomethyl)			419942390	0	9.79453e-09	153.37	2.63957e-13	2	1421.67
VAEVLFDAADANAIEEVNLAYENVK	UniProtKB:Q14204				1004530307	0	3.41216e-08	153.31	2.0372e-13	2	1354.18
ATLVESSTSGFTPGGGGSSVSMIASR	UniProtKB:P49321				2552151749	0	4.52625e-08	153.29	2.37923e-13	2	1222.09
DLYANTVLSGGTTmYPGIADR	UniProtKB:CON_P60712;UniProtKB:P63261	M14(Oxidation)			24285570840	0	6.2562e-06	152.86	2.58855e-13	2	1116.04
SQDAEVGDGTTSVTLLAAEFLK	UniProtKB:Q99832				5499313186	0	1.71752e-07	152.17	2.3775e-13	2	1126.57
FDGALNVDLTEFQTNLVPYPR	Ensembl:CON_ENSBTAP00000016242;UniProtKB:Q71U36;UniProtKB:P68363;UniProtKB:Q9BQE3;UniProtKB:Q13748;UniProtKB:Q6PEY2;UniProtKB:P68366;UniProtKB:Q9NY65				69382042820	0	2.93285e-07	151.92	2.6151e-13	2	1205.11
YESVIATLcENLDSLDEPEAR	UniProtKB:Q10567	C9(Carbamidomethyl)			888823546	0	1.21605e-05	151.79	3.76338e-13	2	1212.57
EAPAEGEAAEPGSPTAAEGEAASAASSTSSPK	UniProtKB:P29966				13974822016	0	3.00632e-10	151.74	4.41621e-13	2	1458.16
IcSIYTQSGENSLVQEGSEASPIGK	UniProtKB:Q9Y4W2	C2(Carbamidomethyl)			230988742	0	1.2073e-07	151.73	3.41824e-13	2	1327.65
SAATSGAGSTTSGVVSGSLGSR	UniProtKB:Q7Z6Z7				1249586464	0	4.08525e-07	151.68	2.90088e-13	2	948.97
LDcSQGYTEENTIFAPR	UniProtKB:Q9BVG4	C3(Carbamidomethyl)			2290148088	0	1.82871e-05	151.41	3.61349e-13	2	1000.95
ANDGEGGDEEAGTEEAVPR	UniProtKB:Q9H3Q1				215321064	0	1.02597e-06	151.36	3.08139e-13	2	951.898
DLGLSESGEDVNAAILDESGKK	UniProtKB:P13667				3394184820	0	1.27544e-06	151.26	3.33534e-13	2	1124.06
SVTSNQSDGTQEScESPDVLDR	UniProtKB:Q9UGV2	C14(Carbamidomethyl)			57367705	0	1.50852e-05	151.18	3.97157e-13	2	1206.01
QVYEEEYGSSLEDDVVGDTSGYYQR	UniProtKB:P08758				7.03752e+08	0	6.01989e-08	151.02	5.15602e-13	2	1444.63
aASAAAASAAAASAASGSPGPGEGSAGGEK	UniProtKB:Q13263	N-Term(Acetyl)			1.42305e+10	0	2.82481e-07	150.51	5.00843e-13	2	1215.07
SQSPAASDcSSSSSSASLPSSGR	UniProtKB:O95817	C9(Carbamidomethyl)			4.84793e+08	0	2.14958e-07	150.5	4.61178e-13	2	1100.48
IATSLDGFDVASVQQQR	UniProtKB:O60664				2072390166	0	4.86136e-05	150.43	3.28373e-13	2	917.97
VPSTETEALASNLMGMFEK	UniProtKB:P31150				6505680657	0	1.33155e-07	150.38	4.19033e-13	2	1028
SQMESMLISGYALNcVVGSQGMPK	UniProtKB:P17987	C15(Carbamidomethyl)			484166864	0	7.57188e-07	150.12	5.54271e-13	2	1294.11
GGQLQEQLTQQLSQALSSAVAGR	UniProtKB:Q6P2E9				844635215	0	1.32147e-06	150.03	2.78072e-13	2	1185.63
LAPITSDPTEATAVGAVEASFK	UniProtKB:P14618				19635209420	0	1.09429e-06	149.81	3.53847e-13	2	1088.06
LIVDEAINEDNSVVSLSQPK	UniProtKB:P55072				6046168532	0	7.87917e-07	149.67	3.44831e-13	2	1085.57
FAENDVIGcFADFEcGNDVELSFTK	UniProtKB:Q9BUJ2	C9(Carbamidomethyl); C15(Carbamidomethyl)			144524798	0	3.4526e-07	149.66	6.72922e-13	2	1442.63
ETENNQMTSESGATAGR	UniProtKB:O43164				2.04595e+08	0	4.86136e-05	149.57	4.36111e-13	2	891.885
LLEVSDDPQVLAVAAHDVGEYVR	UniProtKB:Q9UI12				2095655552	0	5.65346e-08	149.47	3.90175e-13	2	1248.14
LDLWNLNNDTEVPTASISVEGNPALNR	UniProtKB:Q13409				361251966	0	9.86459e-09	149.37	5.0499e-13	2	1476.74
LIYGTVTEDNEEEDDDTLEELGGLFR	UniProtKB:Q14692				243670760	0	1.19524e-08	149.36	7.27828e-13	2	1486.69
SIEGTADDEEEGVSPDTAIR	UniProtKB:Q29RF7				169256196	0	8.1397e-07	149.35	5.77588e-13	2	1045.97
TLVLSNLSYSATEETLQEVFEK	UniProtKB:P19338				15720371927	0	4.52403e-06	149.29	4.08865e-13	2	1251.14
mIINEELMASLDQPTQTVVMHR	UniProtKB:Q99613	M1(Oxidation)			889762528	0	1.35269e-07	149.07	6.1178e-13	2	1286.63
TEGDEEAEEEQEENLEASGDYK	UniProtKB:P12956				4.28065e+09	0	5.33794e-07	149.03	5.59178e-13	2	1251
DIALGMQTEIEEQDDILDR	UniProtKB:O95721				47840910	0	1.71578e-06	148.92	6.43153e-13	2	1102.53
VLATDFDDEFDDEEPLPAIGTcK	UniProtKB:Q96RU3	C22(Carbamidomethyl)			154888508	0	3.30371e-08	148.8	7.74344e-13	2	1299.09
mDTDLETMDLDQGGEALAPR	UniProtKB:O75643	M1(Oxidation)			2.06496e+09	0	6.91224e-07	148.73	6.95962e-13	2	1097.48
ASAFNSWFENAEEDLTDPVR	UniProtKB:Q13813				5.96241e+08	0	4.15839e-05	148.71	7.61959e-13	2	1149.52
TIELSDDDFLGEcEcTLGQIVSSK	UniProtKB:O75131	C13(Carbamidomethyl); C15(Carbamidomethyl)			5.89894e+08	0	3.67157e-08	148.65	8.11859e-13	2	1358.62
SSSSSSASAAAAAAAASSSAScSR	UniProtKB:Q07065	C22(Carbamidomethyl)			174028195	0	4.75265e-07	148.46	6.94556e-13	2	1045.46
VVDYSQFQESDDADEDYGR	UniProtKB:Q9H1E3				3967950272	0	1.66138e-05	148.44	6.09253e-13	2	1119.46
TASEMVLADDNFSTIVAAVEEGR	UniProtKB:P16615;UniProtKB:O14983				3.12013e+08	0	1.2153e-06	148.44	7.48247e-13	2	1213.08
ATLVESSTSGFTPGGGGSSVSmIASR	UniProtKB:P49321	M22(Oxidation)			357773642	0	1.39875e-07	148.38	7.3397e-13	2	1230.1
LASSDTGESDQSSTETDSTVK	UniProtKB:Q96AY4				53883154	0	7.26051e-07	148.31	7.5534e-13	2	1072.98
TYLLDGScMVEESGTLESQLEATK	UniProtKB:Q13813	C8(Carbamidomethyl)			693901954	0	2.11595e-07	148.26	8.73509e-13	2	1331.12
NINADEAAAMGAVYQAAALSK	UniProtKB:Q9Y4L1				1426172704	0	1.27421e-07	148.12	6.775e-13	2	1040.02
SLGSTAGTDITVNSVILLPK	UniProtKB:Q2TAY7				752001696	0	5.66108e-06	148.04	1.95039e-13	2	993.562
LFLNETQTQEITEDIPVK	UniProtKB:P41252				2337179448	0	1.28554e-05	148.04	4.74564e-13	2	1059.55
DLVVYENSSNPVcTLNDTAQFNR	UniProtKB:O15226	C13(Carbamidomethyl)			252531939	0	1.76022e-07	147.84	9.35976e-13	2	1328.62
YIELFLNSTPGGGSGMGGSGMGGYGR	UniProtKB:P31942				2244852718	0	2.46842e-07	147.61	1.0434e-12	2	1261.57
GAYGGGYGGYDDYNGYNDGYGFGSDR	UniProtKB:P31943				1298186716	0	1.75261e-08	147.38	7.82427e-13	2	1359.03
TVYVGNLNSQTTTADQLLEFFK	UniProtKB:Q8WXA9				727134000	0	9.53209e-06	147.33	7.11321e-13	2	1245.13
SLVEASSSGVSVLSLcEK	UniProtKB:Q9UQ80	C16(Carbamidomethyl)			3507342240	0	3.00613e-05	147.23	6.71498e-13	2	926.476
YAALANLDNIFSAGQGGDQGSGFGTTGK	UniProtKB:P52594				573758574	0	1.50007e-08	147.16	1.0751e-12	2	1359.15
DTMSDQALEALSASLGTR	UniProtKB:P20810				2400569048	0	1.55366e-05	147.04	8.77972e-13	2	933.452
VELNALMTDETISNVPILILGNK	UniProtKB:Q9NR31				3241043120	0	2.61167e-07	146.95	2.79746e-13	2	1249.19
GLGLGANLTEAQALTPTGPSR	UniProtKB:Q92917				1213300296	0	3.45697e-06	146.41	5.25802e-13	2	1012.55
NSLLAGGDDDTMSVISGISSR	UniProtKB:Q8N3U4				942625392	0	2.46664e-07	146.4	1.09435e-12	2	1048.01
LLLEVTYEAIVDGGINPDSLR	UniProtKB:P49327				852257978	0	6.18893e-07	146.27	4.92514e-13	2	1144.12
GESLADSVQTMScYADVVVLR	UniProtKB:P27708	C13(Carbamidomethyl)			547662713	0	1.32477e-05	146.24	1.22586e-12	2	1150.55
sHVAVENALGLDQQFAGLDLNSSDNQSGGSTASK	UniProtKB:O00571	N-Term(Acetyl)			1422880696	0	1.36392e-07	146.06	1.50887e-12	3	1153.88
mAEDEAETIGNLIEEcGGLEK	UniProtKB:O00629	M1(Oxidation); C16(Carbamidomethyl)			895984619	0	1.20336e-06	146.02	1.4277e-12	2	1162.52
VEGTEPTTAFNLFVGNLNFNK	UniProtKB:P19338				7258236021	0	8.54854e-06	145.84	1.11921e-12	2	1156.58
LFVGGLSFDTNEQSLEQVFSK	UniProtKB:Q14011				4714374120	0	1.10158e-06	145.78	1.09396e-12	2	1173.09
GFVANSFYSGLTPTEFFFHTMAGR	UniProtKB:O14802				328492250	0	3.26711e-07	145.73	1.5613e-12	3	895.421
IAFIMDESNVLDSGFLER	UniProtKB:Q14204				1560719696	0	1.00155e-05	145.7	1.17768e-12	2	1028.51
FTASAGIQVVGDDLTVTNPK	UniProtKB:P06733				27446982754	0	6.42608e-06	145.65	8.08506e-13	2	1017.03
LALSSVDASEQTEWQQLVDDAK	UniProtKB:P50748				138091656	0	3.17216e-07	145.63	1.28093e-12	2	1217.1
EFEETMDALQADIDQLEAEK	UniProtKB:Q14203				840215456	0	3.02862e-06	145.61	1.51972e-12	2	1163.03
APNTPASGANGDGSmSQTQSGSTVK	UniProtKB:CON_P15636	M15(Oxidation)			6.88826e+09	0	5.37148e-07	145.55	1.56622e-12	2	1183.53
LALETTVLVESYTLPDGR	UniProtKB:P61160				5.96972e+07	0	4.86136e-05	145.54	6.2539e-13	2	989.035
NADmSEEMQQDSVEcATQALEK	UniProtKB:P63167	M4(Oxidation); C15(Carbamidomethyl)			1257591476	0	1.12681e-06	145.51	1.45136e-12	2	1265.52
KLEEEQIILEDQNcK	UniProtKB:P35579	C14(Carbamidomethyl)			2057598496	0	1.63597e-05	145.48	1.16823e-12	2	944.972
SGQPVTADDLGVTGALTVLMK	UniProtKB:Q6UB35				436969604	0	2.79663e-06	145.48	7.64617e-13	2	1037.05
SINPDEAVAYGAAVQAAILMGDK	UniProtKB:P34931;UniProtKB:P08107				28787847617	0	4.28117e-06	145.47	1.20441e-12	2	1152.58
FGQAATmEGIGAIGGTPPAFNR	UniProtKB:Q15233	M7(Oxidation)			1509487586	0	6.37106e-07	145.21	1.3795e-12	2	1090.03
GAQDVAGGSNPGAHNPSANLAR	UniProtKB:O14654				5458849248	0	1.21716e-07	145.07	1.44679e-12	2	1031
ATEDGEEDEEMIESIENLEDLK	UniProtKB:P49736				1.40451e+09	0	6.6905e-07	144.96	1.87583e-12	2	1269.56
VLAAGGLGQGGGGGQSSVLSGISLYDPR	UniProtKB:Q9UPT8				469847544	0	1.11716e-06	144.96	9.03524e-13	2	1287.17
LQVEPAVDTSGVQcYGPGIEGQGVFR	UniProtKB:P21333	C14(Carbamidomethyl)			1616723196	0	8.33747e-09	144.95	1.63528e-12	2	1382.18
LYLEDDDPVQAEAYINR	UniProtKB:Q9BT78				1221737384	0	2.02582e-05	144.8	1.57138e-12	2	1012.49
NYQFFIGENMNPDGMVALLDYR	UniProtKB:P13693				979596370	0	3.45704e-07	144.76	1.98295e-12	2	1304.11
YGINTTDIFQTVDLWEGK	UniProtKB:P37802				8679477056	0	3.2536e-05	144.6	1.51975e-12	2	1050.52
EIEVDSSPSVLEILDTAGTEQFASMR	UniProtKB:P61225;UniProtKB:Q9Y3L5;UniProtKB:P10114				172722176	0	8.10282e-08	144.54	1.91952e-12	2	1412.68
ELDPTNMTYITNQAAVYFEK	UniProtKB:P31948				3211693384	0	1.18211e-05	144.51	1.93937e-12	2	1174.55
LEGLGSSEADQDGLASTVR	UniProtKB:Q07065				547955302	0	2.03355e-05	144.43	1.5732e-12	2	952.969
QSSYSQQPYNNQGQQQNMESSGSQGGR	UniProtKB:Q92804				629107561	0	4.86136e-05	144.4	2.3257e-12	2	1488.15
IGPSILNSDLANLGAEcLR	UniProtKB:Q96AT9	C17(Carbamidomethyl)			4552798384	0	1.75968e-05	144.39	1.13232e-12	2	1007.03
GILSGTSDLLLTFDEAEVR	UniProtKB:P18206				288842344	0	7.35903e-06	144.34	1.14194e-12	2	1018.53
SIMGLEGEDEGAISMLSDNTAK	UniProtKB:Q8WVM8				647848607	0	1.96734e-07	144.31	2.02151e-12	2	1134.52
DAASLESQLQDTQELLQEETR	UniProtKB:P35580				3687928474	0	6.86068e-07	144.26	1.93486e-12	2	1202.58
QTQTFTTYSDNQPGVLIQVYEGER	UniProtKB:P11142				4471492376	0	3.28434e-08	144.18	1.94887e-12	2	1387.68
VQNATLAVANITNADSATR	UniProtKB:P27105				1.69863e+08	0	1.56984e-05	144.15	1.06243e-12	2	965.512
mTTETASEDDNFGTAQSNK	UniProtKB:Q92616	M1(Oxidation)			723069293	0	1.55713e-06	144.09	1.65023e-12	2	1031.93
AQEAcGPLEMDSALSVVQNLEK	UniProtKB:Q9Y490	C5(Carbamidomethyl)			1405111716	0	1.16868e-06	144.04	2.04546e-12	2	1195.07
ASTASPcNNNINAATAVALQEPR	UniProtKB:Q71RC2	C7(Carbamidomethyl)			83036405	0	1.59679e-05	143.93	1.92578e-12	2	1185.58
LcDFGVSGQLIDSMANSFVGTR	UniProtKB:P36507;UniProtKB:Q02750	C2(Carbamidomethyl)			1592661742	0	3.20833e-07	143.92	2.22056e-12	2	1187.56
IAQLEEELEEEQSNMELLNDR	UniProtKB:P35580				1211206232	0	1.04647e-06	143.83	2.29128e-12	2	1266.6
SSGSPYGGGYGSGGGSGGYGSR	UniProtKB:P51991				16825743896	0	5.10407e-07	143.66	1.74342e-12	2	955.899
AGVLSQADYLNLVQcETLEDLK	UniProtKB:P61421	C15(Carbamidomethyl)			2464082144	0	2.12863e-06	143.5	1.86178e-12	2	1240.13
QNLYDLDEDDDGIASVPTK	UniProtKB:Q9BY77				294367519	0	3.1329e-05	143.49	2.29655e-12	2	1054.48
ALTSADGASEEQSQNDEDNQGSEK	UniProtKB:Q92552				152208955	0	2.86585e-08	143.19	2.50301e-12	2	1255.52
SFMESGGTVLSTNWSDVGK	UniProtKB:Q9Y2Z0				945617174	0	1.45532e-05	143.13	2.43982e-12	2	1001.46
NQALNTDNYGHDLASVQALQR	UniProtKB:Q13813				1841380288	0	1.1089e-08	143.13	2.28782e-12	2	1164.57
AIGSASEGAQSSLQEVYHK	UniProtKB:P28066				19435572576	0	5.92934e-06	142.99	2.2191e-12	2	981.484
sQSPAASDcSSSSSSASLPSSGR	UniProtKB:O95817	S1(Phospho); C9(Carbamidomethyl)	9.96897e-07	S(1): 0.0; S(3): 100.0; S(7): 0.0; S(10): 0.0; S(11): 0.0; S(12): 0.0; S(13): 0.0; S(14): 0.0; S(15): 0.0; S(17): 0.0; S(20): 0.0; S(21): 0.0	2.51569e+08	0	3.79741e-06	142.98	2.15196e-12	2	1140.46
LLEPSVGSLFGDDEDDDLFSSAK	UniProtKB:Q641Q2;UniProtKB:Q5SNT6;UniProtKB:Q9Y4E1				4.98482e+08	0	8.47627e-07	142.98	2.82413e-12	2	1228.57
AVSSAIAQLLGEVAQGNENYAGIAAR	UniProtKB:Q9Y490				1768797051	0	1.24634e-07	142.78	1.68819e-12	2	1287.17
KINEELESQYQQSMDSK	UniProtKB:O00193				1554650288	0	2.81465e-06	142.75	2.67725e-12	2	1028.98
NVSATLVNISPDTSLLLDcGEGTFGQLcR	UniProtKB:Q9BQ52	C19(Carbamidomethyl); C28(Carbamidomethyl)			1063478270	0	1.80235e-05	142.54	2.75055e-12	3	1046.52
GNDISSGTVLSDYVGSGPPK	UniProtKB:P30086				11455707884	0	5.17135e-06	142.43	2.4565e-12	2	975.481
NASTFEDVTQVSSAYQK	UniProtKB:Q14247				4204492681	0	1.22365e-05	142.41	2.61826e-12	2	937.943
FVDEEDGGDGQAGPDEGEVDScLR	UniProtKB:O15511	C22(Carbamidomethyl)			391735879	0	3.99091e-07	142.28	2.80726e-12	2	1277.02
VVMALGDYMGAScHAcIGGTNVR	UniProtKB:P60842	C13(Carbamidomethyl); C16(Carbamidomethyl)			9365313898	0	1.22315e-08	142.22	3.49468e-12	2	1220.06
LTADDEAFLSANAGAILSQFEK	UniProtKB:Q8WZA0				1843005592	0	7.36925e-07	142.19	2.48525e-12	2	1156.08
AELGTDLLSQLSLEDQK	UniProtKB:Q9UQE7				3638038384	0	4.86136e-05	142.17	1.90364e-12	2	930.486
LQGINcGPDFTPSFANLGR	UniProtKB:Q04637	C6(Carbamidomethyl)			3118509652	0	5.00731e-06	142.09	2.82001e-12	2	1032.51
LLQDSVDFSLADAINTEFK	UniProtKB:P08670				21025757148	0	1.34104e-05	141.97	2.34596e-12	2	1063.54
LQELEScSGLGSTSDDTDVR	UniProtKB:Q14C86	C7(Carbamidomethyl)			880552696	0	4.72779e-07	141.86	3.35589e-12	2	1084.99
SEQDQAENEGEDSAVLMER	UniProtKB:Q99613				3013584264	0	9.22395e-06	141.66	3.17697e-12	2	1068.95
mQEAMTQEVSDVFSDTTTPIK	UniProtKB:P18206	M1(Oxidation)			6.54783e+08	0	1.81806e-07	141.59	3.97368e-12	2	1187.55
QEEMNSQQEEEEMETDAR	UniProtKB:Q13435				9.62731e+08	0	4.86136e-05	141.55	2.48969e-12	2	1106.93
EPTTESLQALcALGLAMQDATLSK	UniProtKB:Q6PGP7	C11(Carbamidomethyl)			169244292	0	1.14334e-07	141.55	3.03626e-12	2	1274.64
IcALDDNVcMAFAGLTADAR	UniProtKB:O14818	C2(Carbamidomethyl); C9(Carbamidomethyl)			5004030688	0	7.13103e-06	141.25	4.02656e-12	2	1092.5
KGEPVSAEDLGVSGALTVLMK	UniProtKB:P11586				809164160	0	4.96505e-06	141.19	1.75141e-12	2	1051.07
NSVMELIANGTLNILEEENHIK	UniProtKB:Q9HAV4				2748644932	0	4.86136e-05	141.08	2.75475e-12	3	827.761
LDGETTDLQDQIAELQAQIDELK	UniProtKB:P35580				159652792	0	6.43825e-07	140.96	3.46606e-12	2	1293.65
AFLADPSAFVAAAPVAAATTAAPAAAAAPAK	UniProtKB:P05388				11194042766	0	2.68799e-07	140.91	1.6353e-12	2	1376.74
SEGEGEAASADDGSLNTSGAGPK	UniProtKB:Q9NWV8				1452661610	0	2.38205e-06	140.65	4.18142e-12	2	1053.96
IFTASNVSSVPLPAENVTITAGQR	UniProtKB:Q14157				1835516980	0	5.97245e-06	140.57	1.98728e-12	2	1236.66
AQNAPSPGQSQADSSSLEQEK	UniProtKB:O95248				5.28351e+07	0	2.25201e-06	140.5	4.79226e-12	2	1080.01
TTGEENGVEAEEWGK	UniProtKB:O00429				676215292	0	4.86136e-05	140.33	3.55347e-12	2	818.361
GVIINTASVAAFEGQVGQAAYSASK	UniProtKB:Q99714				877494128	0	8.89096e-07	140.13	3.31429e-12	2	1220.13
YSDESGNMDFDNFIScLVR	UniProtKB:P04632	C16(Carbamidomethyl)			1600694059	0	1.96067e-05	140.1	4.87397e-12	2	1134.98
GVAALTSDPAVQAIVLDTASDVLDK	UniProtKB:Q9Y490				819038536	0	2.78592e-08	139.94	2.22199e-12	2	1235.16
WGDAGAEYVVESTGVFTTMEK	UniProtKB:P04406;UniProtKB:CON_P10096				4058904910	0	2.56898e-06	139.86	5.75506e-12	2	1139.02
VLAGETLSVNDPPDVLDR	UniProtKB:Q12906				10717712811	0	2.08822e-05	139.84	3.12711e-12	2	955.501
SNTSPEELGPLANQLTSDYGR	UniProtKB:Q9Y490				1030876962	0	1.00581e-05	139.82	5.36898e-12	2	1125.04
LAVTSYTDIADLMDAGNK	UniProtKB:O60333				260866077	0	9.43532e-06	139.77	4.58658e-12	2	949.465
IDTASLGDSTDSYIEVLDGSR	UniProtKB:Q7KZ85				886058768	0	5.9619e-06	139.73	5.49896e-12	2	1107.53
VFDFELSSQDMTTLLSYNR	UniProtKB:P15121				472097677	0	1.03423e-05	139.72	5.60336e-12	2	1133.54
DLSAAGIGLLAAATQSLSMPASLGR	UniProtKB:P43243				2.07649e+08	0	3.6284e-06	139.66	2.40835e-12	2	1186.14
IAQLEEELEEEQGNTELINDR	UniProtKB:P35579				2387190548	0	4.04248e-06	139.62	5.74534e-12	2	1236.59
ITHEVDELTQIIADVSQDPTLPR	UniProtKB:P36954				1.39387e+09	0	5.15127e-09	139.42	3.73664e-12	2	1295.67
INAGFGDDLNcIFNDDNAEK	UniProtKB:P24928	C11(Carbamidomethyl)			242707678	0	5.24632e-06	139.33	6.10708e-12	2	1121.49
GSLLGcSIDITSAADSEAITFQK	UniProtKB:P17655	C6(Carbamidomethyl)			261177113	0	7.03877e-07	139.26	5.58141e-12	2	1192.59
GEGLQEGVDWLQDQIQTVKT	UniProtKB:Q9H0F7				145582305	0	9.2239e-06	139.23	5.02609e-12	2	1122.57
VGEAGLLSVDcSEAGPGALGLEAVSDSGTK	UniProtKB:O75369	C11(Carbamidomethyl)			1097536187	0	1.71648e-09	139.15	6.57044e-12	2	1423.68
ITIADQGEQQSEENASTK	UniProtKB:P0CAP2;UniProtKB:Q9BZD3				1.17528e+08	0	1.19733e-05	139.13	5.80049e-12	2	974.964
MAEEGGGGQGDGGSSLASGSTQR	UniProtKB:Q9NVF7				3.86449e+07	0	3.59196e-07	139.01	5.94919e-12	2	1048.45
GQGcTAYDVAVNSDFYR	UniProtKB:Q9NWS0	C4(Carbamidomethyl)			365992834	0	1.59262e-05	139	5.8817e-12	2	961.922
VELFFKDDANNDPQWSEEQLIAAK	UniProtKB:P22234				1477354500	0	1.01335e-06	138.99	6.45046e-12	2	1404.19
GPLLEDGALSQAVSAGASSPEFTK	UniProtKB:Q8NCA5				1260295344	0	3.9078e-07	138.94	5.14213e-12	2	1166.59
LNATNIELATVQPGQNFHMFTK	UniProtKB:P28066				20964030711	0	1.77909e-05	138.93	5.18469e-12	2	1237.63
LcYVALDFEQEmATAASSSSLEK	UniProtKB:CON_P60712;UniProtKB:P63261;UniProtKB:Q6S8J3	C2(Carbamidomethyl); M12(Oxidation)			2689807538	0	1.92368e-08	138.62	8.12883e-12	2	1283.59
NGFSSVQATQLQTTQSVEGATGSAVK	UniProtKB:Q14157				0	0	1.84829e-07	138.6	5.78795e-12	2	1298.65
ALQSLATVFSSSGYQGETDLNDAITEAGK	UniProtKB:Q9Y5X1				3.06517e+08	0	1.54417e-05	138.31	8.08687e-12	3	991.813
ASPAGTAGGPGAGAAAGGTGPLAAR	UniProtKB:Q12962				1237895072	0	8.51267e-07	138.14	5.41029e-12	2	982.504
VVQVSAGDSHTAALTDDGR	UniProtKB:P18754				1734521482	0	1.00202e-06	137.99	6.9626e-12	2	949.964
DSGVASTEDSSSSHITAAAIAAK	UniProtKB:Q9NQX3				166174727	0	2.9086e-07	137.96	7.64589e-12	2	1088.53
VYAAATEDMDcLTFGSPVLMR	UniProtKB:P39748	C11(Carbamidomethyl)			775614974	0	1.69737e-05	137.93	8.85291e-12	2	1174.05
VVYGGGAAEIScALAVSQEADK	UniProtKB:P48643	C12(Carbamidomethyl)			5100099938	0	6.38923e-08	137.74	7.71254e-12	2	1098.04
ADAVQDSEMVELVELEIR	UniProtKB:P49411				410788804	0	3.37929e-05	137.7	7.02563e-12	2	1023.51
TLVTQNSGVEALIHAILR	UniProtKB:P14923				881940244	0	1.91655e-05	137.69	1.52258e-12	2	968.058
QTFDLADAQTVLALSEcAVTLK	UniProtKB:O43592	C17(Carbamidomethyl)			379009318	0	2.94601e-06	137.66	5.29356e-12	2	1197.63
KPTDGASSSNcVTDISHLVR	UniProtKB:P49321	C11(Carbamidomethyl)			8718055144	0	6.1052e-07	137.51	8.20829e-12	2	1072.52
ETEGGTVLTATTSELEAINK	UniProtKB:Q9UQE7				1147006106	0	7.18702e-06	137.42	6.87041e-12	2	1032.53
SFLADAGYGEQELDANSALMELDK	UniProtKB:Q9NVH2				162284161	0	2.21443e-08	137.41	1.06262e-11	2	1294.1
AQTEGINISEEALNHLGEIGTK	UniProtKB:Q9Y265				7790669520	0	2.36101e-07	137.37	7.08281e-12	2	1162.59
LFDDSTVTTVDESQVVTR	UniProtKB:O94966				495583436	0	2.05903e-05	137.3	7.8487e-12	2	1006.5
KYAPTEAQLNAVDALIDSMSLAK	UniProtKB:P13010				14638565646	0	1.03778e-07	137.3	5.73244e-12	2	1225.14
VGLLDcALNSVTADSEINSLPTISALK	UniProtKB:Q9BSC4	C6(Carbamidomethyl)			388093900	0	2.38057e-07	137.3	4.87494e-12	2	1401.24
TVDFTQDSNYLLTGGQDK	UniProtKB:Q9Y3F4				6994240086	0	2.4362e-05	137.26	9.25657e-12	2	1001.48
TIGGGDDSFNTFFSETGAGK	Ensembl:CON_ENSBTAP00000016242;UniProtKB:Q71U36;UniProtKB:P68363;UniProtKB:Q9BQE3;UniProtKB:Q13748;UniProtKB:Q6PEY2				158766994388	0	1.12843e-05	137.15	9.57112e-12	2	1004.45
MAEGGSGDVDDAGDcSGAR	UniProtKB:Q9UH62	C15(Carbamidomethyl)			4.82107e+07	0	7.75098e-06	137.13	5.4152e-12	2	913.853
NPGVGNGDDEAAELMQQVNVLK	UniProtKB:Q15691				1930544512	0	1.2883e-08	137.04	1.06094e-11	2	1149.55
EMEENFAVEAANYQDTIGR	UniProtKB:P08670				13006242397	0	1.52252e-05	136.94	1.06016e-11	2	1093.99
NAGDLAPAGGAASASTDEAADAESGTR	UniProtKB:Q9NXV6				241506142	0	2.83857e-06	136.9	1.14082e-11	2	1217.04
YGSGSGQQSVTGVEASDDANSYWR	UniProtKB:Q9HCN8				201518400	0	2.88284e-07	136.85	1.13947e-11	2	1261.04
NSNQLGGNTESSESSETcSSK	UniProtKB:Q9H9A5	C18(Carbamidomethyl)			43878234	0	4.5703e-06	136.83	9.98656e-12	2	1101.97
LADcDcDGMLDEEEFALAK	UniProtKB:Q9H223	C4(Carbamidomethyl); C6(Carbamidomethyl)			206253368	0	1.94032e-06	136.78	8.85648e-12	2	1101.45
KLPIDVTEGEVISLGLPFGK	UniProtKB:P26599				13632205455	0	7.73375e-08	136.7	1.74458e-12	2	1056.61
VIESTQDLGNDLAGVMALQR	UniProtKB:Q01082				527337431	0	6.57422e-06	136.7	7.53097e-12	2	1065.55
IDLENTLEQEQEALVNR	UniProtKB:Q16204				840562640	0	4.86136e-05	136.63	8.65387e-12	2	1007.51
VLGVDQSEILYQAMDIIR	UniProtKB:O60678				1255298564	0	1.29611e-05	136.61	5.7886e-12	2	1032.05
EGIcALGGTSELSSEGTQHSYSEEEK	UniProtKB:P13797	C4(Carbamidomethyl)			15148040520	0	1.41311e-09	136.55	1.38706e-11	2	1393.11
EmEENFAVEAANYQDTIGR	UniProtKB:P08670	M2(Oxidation)			3482914247	0	4.86136e-05	136.41	1.1972e-11	2	1101.99
MGDEGGESELLGEDLPLEPSVTK	UniProtKB:O60271				1.86111e+08	0	2.06088e-07	136.34	1.26682e-11	2	1201.57
LGGTIDDcELVEGLVLTQK	UniProtKB:P50991	C8(Carbamidomethyl)			7386747744	0	3.45985e-05	136.15	7.65959e-12	2	1030.54
ScTVLNVEGDALGAGLLQNYVDR	UniProtKB:Q15758	C2(Carbamidomethyl)			709931856	0	6.26201e-07	136.09	1.0769e-11	2	1232.62
NPNAMLVNLEEPLASTYQDILYQAK	UniProtKB:P46940				348925024	0	8.35051e-07	136.08	9.5522e-12	2	1418.22
IAEGFSDTALIMVDNTK	UniProtKB:O43402				331845125	0	3.2782e-05	136.07	9.56186e-12	2	912.96
VVLPcSVQEYQVGQLYSVAEASK	UniProtKB:P48739	C5(Carbamidomethyl)			1836767432	0	4.29233e-07	136.04	9.10424e-12	2	1277.65
LTNLEEFMAANNNLELVPESLcR	UniProtKB:Q13045	C22(Carbamidomethyl)			363006129	0	3.04317e-07	136.01	1.27173e-11	2	1339.15
EQLDSSNSTIAILQTEK	UniProtKB:O60763				797972794	0	4.86136e-05	135.97	9.24838e-12	2	938.979
VLSLTMSPDGATVASAAADETLR	UniProtKB:Q12834				134012608	0	1.72912e-05	135.93	9.35565e-12	2	1138.58
FDYSGVGSSDGNSEESTLGK	UniProtKB:Q9NUJ1				832355954	0	1.87186e-06	135.92	1.20254e-11	2	1018.44
VPADLGAEAGLQQLLGALR	UniProtKB:P35270				1697648248	0	5.59434e-07	135.9	2.54212e-12	2	946.543
DQLQTFSEEHPVLLTEAPLNPR	UniProtKB:P61163				3864302280	0	1.71821e-05	135.83	9.56573e-12	2	1267.65
NADMSEEMQQDSVEcATQALEK	UniProtKB:P63167	C15(Carbamidomethyl)			10387412398	0	1.11702e-06	135.71	1.38564e-11	2	1257.53
YEESNLGLLESSVGDSR	UniProtKB:Q86TU7				2.76052e+08	0	4.86136e-05	135.62	1.29485e-11	2	927.936
HELLLGAGSGPGAGQQQATPGALLQAGPPR	UniProtKB:Q96DI7				6218111368	0	5.89418e-06	135.54	6.39772e-12	3	950.509
GSQAQPDSPSAQLALIAASQSFLQPGGK	UniProtKB:Q9Y490				519923568	0	7.681e-09	135.35	1.04269e-11	2	1377.7
SINPDEAVAYGAAVQAAILSGDK	UniProtKB:P11142				45655524116	0	1.60792e-07	135.34	1.13603e-11	2	1130.58
mTVDESGQLIScSMDDTVR	UniProtKB:O75083	M1(Oxidation); C12(Carbamidomethyl)			904919148	0	7.15014e-06	135.31	1.46249e-11	2	1080.47
DAEDAmDAMDGAVLDGR	UniProtKB:Q01130	M6(Oxidation)			3918078692	0	3.18951e-05	135.3	1.01005e-11	2	884.362
NILAEQLQAETELFAEAEEMR	UniProtKB:P35580				1.08096e+09	0	1.8648e-06	135.05	1.49005e-11	2	1218.1
LTLTSDESTLIEDGGAR	UniProtKB:Q9NRX5				863114518	0	4.86136e-05	135.04	1.29185e-11	2	889.444
VADLTEQYNEQYGAVR	UniProtKB:Q9BWF3				3962125792	0	4.86136e-05	135.01	1.4136e-11	2	928.445
ASSQVLSESPSQDSLDAFMSEMK	UniProtKB:Q9BWU0				189022580	0	4.86136e-05	134.98	1.89564e-11	2	1237.56
QFLDcSTTQSDLSLcEGFSEALK	UniProtKB:Q8WYQ3	C5(Carbamidomethyl); C15(Carbamidomethyl)			204089300	0	3.19159e-07	134.89	1.96193e-11	2	1318.6
TSVQTEDDQLIAGQSAR	UniProtKB:P35221;UniProtKB:P26232				778381720	0	1.17785e-05	134.88	1.40145e-11	2	909.946
LVSDDLDSSLANLVGNLGIGNGTTK	UniProtKB:Q13492				444537399	0	9.54495e-08	134.88	8.90902e-12	2	1237.15
NNLSFIETSALDSTNVEEAFK	UniProtKB:Q15907				755491154	0	2.62988e-06	134.77	1.65063e-11	2	1165.07
GTELDDGIQADSGPINDTDANPR	UniProtKB:P55210				417553431	0	4.86136e-05	134.7	1.94039e-11	2	1186.04
PSSLLGAAMPASTSAAALQEALENAGR	UniProtKB:O75694				1744496244	0	1.91268e-06	134.69	1.31656e-11	3	862.106
TILSNQTVDIPENVDITLK	UniProtKB:P32969				9532152584	0	6.17558e-06	134.58	7.14266e-12	2	1057.07
mALELLTQEFGIPIER	UniProtKB:P49588	M1(Oxidation)			5739845864	0	4.86136e-05	134.56	9.39603e-12	2	938.499
TGGAYGEDLGADYNLSQVcDGK	UniProtKB:P49327	C19(Carbamidomethyl)			4680548694	0	9.94131e-07	134.55	1.8902e-11	2	1145.5
STNcFGDNDPIDVcEIGSK	UniProtKB:Q9H2U2	C4(Carbamidomethyl); C14(Carbamidomethyl)			781418732	0	1.26089e-05	134.54	1.56726e-11	2	1064.45
DAEDAMDAMDGAVLDGR	UniProtKB:Q01130				22630633720	0	3.21965e-05	134.52	1.32638e-11	2	876.367
FFLQGIQLNTILPDAR	UniProtKB:P11279				3071705742	0	4.86136e-05	134.49	4.73345e-12	2	923.521
ITTGSSSAGTQSSTSNR	UniProtKB:O14974				7.35826e+07	0	4.86136e-05	134.4	1.5242e-11	2	821.391
NVAAYTEQEEADSQGcVQK	UniProtKB:Q13439	C16(Carbamidomethyl)			6.02293e+07	0	8.86701e-06	134.38	1.8856e-11	2	1063.98
TITTLYVGGLGDTITETDLR	UniProtKB:Q9NW64				764938708	0	7.87837e-06	134.36	1.01741e-11	2	1070.07
HPSAVTAcNLDLENLVTDSNR	UniProtKB:Q9Y678	C8(Carbamidomethyl)			911162085	0	8.58588e-08	134.31	1.87027e-11	2	1163.56
AFLQGGQEATDIALLLR	UniProtKB:Q14203				2707961916	0	4.86136e-05	134.27	6.16721e-12	2	908.506
TQGNVFATDAILATLMScTR	UniProtKB:O15371	C18(Carbamidomethyl)			1716076509	0	3.3915e-06	134.24	1.66164e-11	2	1085.54
VLQAQGSSDPEEESVLYSNR	UniProtKB:Q15785				55941124	0	9.52762e-06	134.24	1.89237e-11	2	1104.53
AGYVDFENGQWATDDIPDDLNSIR	UniProtKB:P55265				539833616	0	2.47089e-07	134.23	2.31829e-11	2	1356.11
EAASILQELQVETYGSMEK	UniProtKB:O00232				2173289900	0	3.71563e-06	134.21	1.66899e-11	2	1063.53
SELMSVTPNTGMSLFIINFEEGR	UniProtKB:Q9NQ88				1.16812e+08	0	8.90053e-06	134.12	2.10707e-11	2	1286.62
QAFDDAIAELDTLNEDSYK	UniProtKB:Q04917				6768818560	0	3.68796e-06	134.08	2.04996e-11	2	1079.5
WSTDDVQINDISLQDYIAVK	UniProtKB:P46782				3735327328	0	2.56214e-05	134.08	1.68667e-11	2	1162.08
SSQGSSSSTQSAPSETASASK	UniProtKB:Q9ULU4				3.35574e+07	0	4.86136e-05	134.06	1.89765e-11	2	986.443
YATDTFAGLcHQLTNALVER	UniProtKB:Q9UNS2	C10(Carbamidomethyl)			2910746912	0	1.81625e-07	133.97	1.90692e-11	2	1140.56
GGAGNTSTScGDSNSIcPAPSTMSK	UniProtKB:P49247	C10(Carbamidomethyl); C17(Carbamidomethyl)			3.17717e+08	0	4.50613e-07	133.97	2.09814e-11	2	1222.51
VSSTATTQDVIETLAEK	UniProtKB:P55196				680578498	0	4.86136e-05	133.95	1.35051e-11	2	896.965
SVSTPSEAGSQDSGDGAVGSR	UniProtKB:Q13409				3547483328	0	1.44711e-05	133.87	1.94806e-11	2	975.931
TVNELQNLSSAEVVVPR	UniProtKB:O00425				1057126196	0	4.86136e-05	133.85	9.60805e-12	2	928.002
FISNPNSIILAVTAANTDMATSEALK	UniProtKB:O00429				537118224	0	9.02651e-07	133.82	1.22515e-11	2	1346.7
QALQELTQNQVVLLDTLEQEISK	UniProtKB:Q9UL45				105114251	0	3.14226e-07	133.81	6.65041e-12	2	1320.72
AEDGSVIDYELIDQDAR	UniProtKB:P07355				2358078990	0	4.60597e-05	133.74	2.05671e-11	2	954.943
YAGSALQYEDVSTAVQNLQK	UniProtKB:Q9NP79				2358596144	0	8.0605e-06	133.62	1.96551e-11	2	1093.04
VQDDEVGDGTTSVTVLAAELLR	UniProtKB:P78371				15921166176	0	1.41995e-07	133.55	1.61173e-11	2	1144.59
ASPGNLSQFEDILFGNNDMSASIGVVGVK	UniProtKB:P43246				2.06514e+08	0	7.1128e-08	133.55	2.04072e-11	2	1483.74
aAADGGGPGGASVGTEEDGGGVGHR	UniProtKB:A6NHR9	N-Term(Acetyl)			249455765	0	1.6576e-05	133.45	2.41856e-11	2	1090.5
EQSELDQDLDDVEEVEEEETGEETK	UniProtKB:P55209				558242038	0	7.58873e-08	133.43	2.66078e-11	2	1462.61
VLEANDGSGMLDEDEEDLQR	UniProtKB:P54252				1.39931e+08	0	8.77134e-06	133.42	2.40962e-11	2	1118
HTGPGILSMANAGPNTNGSQFFIcTAK	UniProtKB:P62937	C24(Carbamidomethyl)			61410524212	0	1.43459e-07	133.42	2.46103e-11	2	1396.18
ISDSNDQESANcDAK	UniProtKB:Q9Y5Q9	C12(Carbamidomethyl)			105093354	0	4.7658e-05	133.2	1.52252e-11	2	827.341
cIALAQLLVEQNFPAIAIHR	UniProtKB:Q13838	C1(Carbamidomethyl)			14920164491	0	1.18563e-06	133.17	6.34243e-12	2	1139.14
LALSQNQQSSGAAGPTGK	UniProtKB:O95232				5005371401	0	2.4735e-05	133.15	1.6946e-11	2	857.941
mGGMEGPFGGGMENMGR	UniProtKB:P52272	M1(Oxidation)			6589628272	0	4.86136e-05	133.14	1.38307e-11	2	865.841
SLAGSSGPGASSGTSGDHGELVVR	UniProtKB:P29692				28262495392	0	3.75487e-07	133.04	2.43305e-11	2	1093.03
LQNELDNVSTLLEEAEK	UniProtKB:P35580				3.48078e+09	0	4.10343e-05	132.89	1.93383e-11	2	972.993
LAVTSYNDIQDLMDSGNK	UniProtKB:Q12756				776974736	0	3.61472e-05	132.89	2.44017e-11	2	992.475
ISADGYEVENLISEDLTK	UniProtKB:O94941				69229614	0	1.64296e-05	132.89	2.16438e-11	2	998.496
VHTVEDYQAIVDAEWNILYDK	UniProtKB:Q99832				1817435146	0	6.58638e-08	132.89	2.46561e-11	2	1261.12
GLGTDEDTIIDIITHR	UniProtKB:P08133				3682041526	0	4.57408e-05	132.88	1.65878e-11	2	884.959
EGGGDSSASSPTEEEQEQGEIGAcSDEGTAQEGK	UniProtKB:P49006	C24(Carbamidomethyl)			1.12503e+10	0	2.98895e-06	132.88	2.97364e-11	3	1138.46
IITGGAPELAVEGNGPVESNAVLTK	UniProtKB:Q12996				554433649	0	1.5944e-06	132.85	9.37472e-12	2	1218.66
GFDTSSSSSNSAASSSFK	UniProtKB:P49790				484341064	0	4.86136e-05	132.79	2.22006e-11	2	877.382
VTFSEDDEIINPEDVDPSVGR	UniProtKB:Q12972				980725174	0	1.31472e-05	132.78	2.83781e-11	2	1167.05
QLEVYTSGGDPESVAGEYGR	UniProtKB:Q9Y262				843556064	0	2.90691e-06	132.77	2.70643e-11	2	1057.49
APKPEDIDEEDDDVPDLVENFDEASK	UniProtKB:Q96K17				6139779028	0	5.10355e-10	132.74	3.46935e-11	2	1466.16
SSLSSAQADFNQLAELDR	UniProtKB:Q13813				2225093312	0	1.99503e-05	132.72	2.36892e-11	2	976.476
KTTTLSGTAPAAGVVPSR	UniProtKB:P27816				733364044	0	4.86136e-05	132.71	1.0448e-11	2	857.476
VATAQDDITGDGTTSNVLIIGELLK	UniProtKB:P40227				6328537076	0	3.19869e-07	132.62	1.18374e-11	2	1272.69
FQSSAVMALQEASEAYLVGLFEDTNLcAIHAK	UniProtKB:Q71DI3	C27(Carbamidomethyl)			1.65869e+08	0	5.05611e-07	132.62	2.53214e-11	3	1171.91
TIEEcEVILMVGLPGSGK	UniProtKB:Q1KMD3	C5(Carbamidomethyl)			431631556	0	5.63559e-06	132.57	1.83048e-11	2	966.5
LSVSSNDTQESGNSSGPSPGAK	UniProtKB:Q9Y6D6				88249925	0	1.96746e-06	132.57	2.83703e-11	2	1053.49
EGVILTNESAASTGQPDNDVTEGQR	UniProtKB:Q08J23				1009250166	0	4.63118e-06	132.55	3.10306e-11	2	1294.61
TVLQIDDNVTSAVEGINR	UniProtKB:Q15785				1207672302	0	2.81124e-05	132.53	1.55646e-11	2	972.516
ADEEEMLDNLPEAGDSR	UniProtKB:Q9NPD8				151514717	0	4.86136e-05	132.5	2.44337e-11	2	945.904
LVVTQEDVELAYQEAMMNMAR	UniProtKB:P49903				478796096	0	3.53266e-06	132.5	2.91996e-11	2	1221.08
ImQSSSEVGYDAMAGDFVNMVEK	UniProtKB:P10809	M2(Oxidation)			844611448	0	2.09017e-08	132.48	3.33426e-11	2	1262.56
QGSDAYDAQTYDVASK	UniProtKB:Q9NU22				184291440	0	4.86136e-05	132.46	2.43477e-11	2	859.882
mLSAVSQQVQcIQEALR	UniProtKB:Q14204	M1(Oxidation); C11(Carbamidomethyl)			1654627164	0	4.86136e-05	132.4	2.24709e-11	2	989.001
mEDSASASLSSAAATGTSTSTPAAPTAR	UniProtKB:O76021	N-Term(Acetyl)			1433348304	0	6.75883e-07	132.28	3.47779e-11	2	1320.11
mSFGEIEEDAYQEDLGFSLGHLGK	UniProtKB:Q8WWY3	M1(Oxidation)			447927635	0	2.62706e-07	132.27	3.6542e-11	3	896.744
TSIDAYDNFDNISLAQR	UniProtKB:Q00610				7178169556	0	4.86136e-05	132.13	2.98306e-11	2	971.963
GKEDEGEEAASPMLQIQR	UniProtKB:Q14204				1319619776	0	1.63265e-06	132.11	2.96269e-11	2	994.473
SYLFNIMDTPGHVNFSDEVTAGLR	UniProtKB:Q15029				2733756326	0	8.33305e-08	132.07	3.33717e-11	2	1342.15
DcGEDGLcISDLVLDVR	UniProtKB:P17301	C2(Carbamidomethyl); C8(Carbamidomethyl)			98576773	0	1.47616e-05	132.06	2.98424e-11	2	968.443
LQVELDNVTGLLSQSDSK	UniProtKB:P35579				11604283756	0	6.08993e-06	132.06	1.87312e-11	2	973.512
aAAAAAAGDSDSWDADAFSVEDPVRK	UniProtKB:O75822	N-Term(Acetyl)			1908337920	0	7.97966e-08	132.04	3.70446e-11	2	1318.1
AAAGELQEDSGLcVLAR	UniProtKB:Q96C19	C13(Carbamidomethyl)			1350020000	0	4.86136e-05	132	2.55979e-11	2	880.439
VIDFDENTALDDAEEESFRK	UniProtKB:Q14257				5920959414	0	5.64515e-06	131.99	3.55415e-11	2	1172.04
ANDEANQSDTSVSLSEPK	UniProtKB:O95684				720104856	0	4.86136e-05	131.89	2.97718e-11	2	946.433
YDcGEEILITVLSAMTEEAAVAIK	UniProtKB:P63241;UniProtKB:Q6IS14	C3(Carbamidomethyl)			267330374	0	3.90268e-05	131.88	2.7301e-11	3	876.107
SLPSVETLGcTSVIcSDK	UniProtKB:P16615;UniProtKB:O14983;UniProtKB:Q93084	C10(Carbamidomethyl); C15(Carbamidomethyl)			533626368	0	4.86136e-05	131.85	2.89272e-11	2	976.976
LITSVADVVNNDPMVGSK	UniProtKB:P06737				2079925952	0	4.86136e-05	131.67	2.24654e-11	2	929.984
AAAPAPEEEMDEcEQALAAEPK	UniProtKB:P26641	C13(Carbamidomethyl)			36533479172	0	3.99032e-06	131.55	3.90617e-11	2	1179.02
LcYVALDFEQEMATAASSSSLEK	UniProtKB:CON_P60712;UniProtKB:P63261;UniProtKB:Q6S8J3	C2(Carbamidomethyl)			60453242545	0	8.66154e-08	131.48	4.21465e-11	2	1275.59
ALDSDMQTLVYENYNK	UniProtKB:Q9UID3				2.97345e+08	0	4.86136e-05	131.37	3.45325e-11	2	952.443
LEGDSTDLSDQIAELQAQIAELK	UniProtKB:P35579				9.72443e+07	0	8.63614e-08	131.37	2.95467e-11	2	1244.13
HSAPGLLSMANSGPSTNGcQFFITcSK	UniProtKB:O43447	C19(Carbamidomethyl); C25(Carbamidomethyl)			646207500	0	3.68903e-06	131.32	4.6547e-11	3	957.111
DTLVQGLNEAGDDLEAVAK	UniProtKB:Q9Y6E2				3506217864	0	4.86136e-05	131.27	2.89995e-11	2	979.492
TVDGMQQEGTPYTGILYAGIMLTK	UniProtKB:P22102				8.32578e+08	0	2.4528e-06	131.21	3.09242e-11	2	1294.15
ScSGVEFSTSGSSNTDTGK	UniProtKB:P45880	C2(Carbamidomethyl)			5.10519e+09	0	2.43266e-05	131.17	3.16686e-11	2	954.404
NVmSAFGLTDDQVSGPPSAPAEDR	UniProtKB:Q92734	M3(Oxidation)			0	0	9.10878e-08	131.14	4.36674e-11	2	1239.08
GLLALGDYMNVQcHAcIGGTNVGEDIR	UniProtKB:P38919	C13(Carbamidomethyl); C16(Carbamidomethyl)			1020634742	0	2.64065e-09	131.13	4.68748e-11	2	1467.19
MVNPTVFFDIAVDGEPLGR	UniProtKB:P62937				2498995384	0	4.86136e-05	131.11	3.00878e-11	2	1039.03
LVILDEADAMTQDAQNALR	UniProtKB:P40937				1063112772	0	9.70682e-06	130.99	3.07716e-11	2	1044.03
AGGAGFGTDGDDQEAINEAISVK	UniProtKB:Q96EB6				167505996	0	1.29762e-06	130.86	4.49594e-11	2	1111.52
QETFDAGLQAFQQEGIANITALK	UniProtKB:Q13813				827348880	0	1.07738e-06	130.8	3.11662e-11	2	1247.13
NAVASVQNGPGGGPSSSSIGSASK	UniProtKB:Q8NI27				26802900	0	3.48032e-05	130.78	3.89767e-11	2	1058.52
SLSVNTLDVLGPcLVcGTDAEAIYVTR	UniProtKB:Q8NFH3	C13(Carbamidomethyl); C16(Carbamidomethyl)			845670546	0	6.71116e-07	130.75	3.92511e-11	2	1462.23
VLQLINDNTATALSYGVFR	UniProtKB:Q9Y4L1				753356301	0	4.86136e-05	130.7	1.73207e-11	2	1048.07
ETIDNNSVSSPLQSLQQR	UniProtKB:P60228				1925191936	0	4.86136e-05	130.69	3.36249e-11	2	1008.51
AQAELENVSGALNEAESK	UniProtKB:Q7Z406				262451410	0	7.29152e-06	130.64	3.63659e-11	2	930.458
IIMTSSASGIYGNFGQANYSAAK	UniProtKB:P51659				542622442	0	8.54991e-07	130.59	4.18502e-11	2	1176.08
AALETDENLLLcAPTGAGK	UniProtKB:O75643	C12(Carbamidomethyl)			5201949168	0	4.86136e-05	130.51	3.37585e-11	2	972.494
IDNSQVESGSLEDDWDFLPPK	UniProtKB:P27797				5.2567e+08	0	4.76366e-06	130.45	5.02536e-11	2	1196.06
NLITDIcTEQcTLSDQLLPK	UniProtKB:Q9Y2A7	C7(Carbamidomethyl); C11(Carbamidomethyl)			2043635030	0	7.18843e-07	130.44	4.14188e-11	2	1181.59
SIVEGIIEEEEEDEEGSESISK	UniProtKB:Q9Y570				636414011	0	1.41873e-07	130.44	5.18559e-11	2	1219.06
GVVPLAGTNGETTTQGLDGLSER	UniProtKB:P04075				19953193960	0	5.04135e-06	130.42	3.68621e-11	2	1136.58
VIPAADLSEQISTAGTEASGTGNMK	UniProtKB:P11217				116616810	0	2.56671e-08	130.39	3.88909e-11	2	1224.62
MQQNIQELEEQLEEEESAR	UniProtKB:P35579				1321984486	0	5.88204e-06	130.38	5.10885e-11	2	1167.03
GWFDAEGQALDGVSISDLK	UniProtKB:P27694				2904697285	0	1.15181e-05	130.34	4.26933e-11	2	1004.49
ANcIDSTASAEAVFASEVK	UniProtKB:P22087	C3(Carbamidomethyl)			1705122602	0	4.78908e-05	130.33	4.39873e-11	2	985.465
ANATVDGLEQGYVVcPSEK	UniProtKB:Q9NVP1	C15(Carbamidomethyl)			629278578	0	1.67777e-05	130.3	4.51182e-11	2	1018.99
AQDPSEVLTMLTNETGFEISSSDATVK	UniProtKB:Q12905				2.03143e+09	0	6.85431e-08	130.23	5.19354e-11	2	1435.69
AVQFGTGELcDAISAVEEK	UniProtKB:Q96EK5	C10(Carbamidomethyl)			1620926037	0	2.61287e-05	130.15	4.71578e-11	2	1012.48
EQMIDLQNLLTTQSPSVK	UniProtKB:Q9BVJ6				704817852	0	8.41712e-06	130.06	3.02443e-11	2	1023.04
IISNAScTTNcLAPLAK	UniProtKB:P04406	C7(Carbamidomethyl); C11(Carbamidomethyl)			107989317896	0	4.86136e-05	130.02	3.73526e-11	2	917.464
GYLVTQDELDQTLEEFK	UniProtKB:P19388				3396447820	0	4.86136e-05	129.85	4.64882e-11	2	1014.5
SVLNSITEEVLDHMGTFR	UniProtKB:Q13416				1074834438	0	4.86136e-05	129.84	4.40794e-11	2	1024.51
SDMMEENIDTSAQAVAETK	UniProtKB:P82970				968867024	0	4.86136e-05	129.82	5.09589e-11	2	1035.45
YLLSQSSPAPLTAAEEELR	UniProtKB:Q12792				1240274176	0	2.38888e-05	129.81	3.33893e-11	2	1038.04
DFLQGSScIAGIYNETTK	UniProtKB:P15924	C8(Carbamidomethyl)			4.60085e+08	0	2.4864e-05	129.73	5.1744e-11	2	1002.47
AMQADISQAAQILSSDPSR	UniProtKB:P42166				769449995	0	4.48981e-06	129.7	4.7104e-11	2	994.991
VAEFFQGVDVIVNASSVEDIDAGAIGQR	UniProtKB:Q16643				82311410	0	6.06253e-06	129.7	4.68468e-11	3	969.489
NYAGEEEEEGSGSSEGFDPPATDR	UniProtKB:P16989				664534475	0	2.19227e-08	129.66	5.36445e-11	2	1265.52
GINSSNVENQLQATQAARK	UniProtKB:P52292				261860388	0	4.86136e-05	129.65	3.47453e-11	2	1015.03
MAYVVDLDDEYADTDIPTTLIR	UniProtKB:Q13123				526645652	0	6.31064e-07	129.61	5.66013e-11	2	1265.11
APVAGTcYQAEWDDYVPK	UniProtKB:P30086	C7(Carbamidomethyl)			12495665384	0	2.11668e-06	129.6	5.59039e-11	2	1035.47
MQLSAELQSDTEEILSK	UniProtKB:O75643				2798374874	0	4.86136e-05	129.54	4.53864e-11	2	961.481
EELQSGVDAANSAAQQYQR	UniProtKB:P46940				6.48357e+08	0	1.19234e-05	129.54	5.56366e-11	2	1032.98
IFVGNVSAAcTSQELR	UniProtKB:Q96PK6	C10(Carbamidomethyl)			3247565464	0	3.7634e-05	129.5	4.31136e-11	2	876.444
ILGQEGDASYLASEISTWDGVIVTPSEK	UniProtKB:Q12905				3.99907e+09	0	8.25513e-10	129.45	4.78521e-11	2	1483.25
mcLAADVPLIESGTAGYLGQVTTIK	UniProtKB:Q9UBT2	M1(Oxidation); C2(Carbamidomethyl)			1099423540	0	3.56149e-08	129.44	4.21434e-11	2	1312.67
ADTSLNNcEGAAGSTSEK	UniProtKB:O76080	C8(Carbamidomethyl)			396697343	0	4.86136e-05	129.39	4.69699e-11	2	906.392
LEFEETEEPDFTALcQK	UniProtKB:P06400	C15(Carbamidomethyl)			36240860	0	4.86136e-05	129.39	5.82535e-11	2	1043.47
VQTLQFHPFEAQTLISGSYDK	UniProtKB:Q13610				1643016596	0	2.25251e-08	129.39	4.6078e-11	2	1205.11
APTISDLLNDQDLLDVIR	UniProtKB:Q8WWZ3				235665040	0	2.46571e-05	129.3	2.76336e-11	2	1006.04
MDTDLETMDLDQGGEALAPR	UniProtKB:O75643				1571942590	0	4.61757e-06	129.25	6.24736e-11	2	1089.49
IPEISIQDMTAQVTSPSGK	UniProtKB:P21333				2811194704	0	2.61611e-06	129.21	4.04951e-11	2	1001.52
KLSEEEILENPDLFLTSEATDYGR	UniProtKB:Q14257				1143689218	0	7.48715e-09	128.97	6.14811e-11	2	1385.18
AIEDEGGNPDEIEITSEGNKK	UniProtKB:Q15424				6131390838	0	7.15847e-07	128.95	6.70881e-11	2	1123.03
RTVPPAVTGITFLSGGQSEEEASINLNAINK	UniProtKB:P04075				87836851	0	3.52572e-06	128.95	3.18057e-11	3	1071.9
HSVDGESLSSELQQLGLPK	UniProtKB:Q9H0A8				666940432	0	5.20241e-07	128.91	4.4156e-11	2	1012.52
GVVPLAGTDGETTTQGLDGLSER	UniProtKB:P09972				25851075558	0	3.05679e-05	128.81	5.49238e-11	2	1137.07
IAAESSENVDcPENPK	UniProtKB:Q32MZ4	C11(Carbamidomethyl)			1816833004	0	1.53928e-05	128.79	5.79322e-11	2	880.396
LSWLDGSGLGFSLEYPTISLHALSR	UniProtKB:P54105				3396220816	0	1.13907e-08	128.76	3.99669e-11	2	1360.21
VASTENGIIFGNIVYDVSGAASDR	UniProtKB:P53618				479394088	0	5.60238e-07	128.73	5.7452e-11	2	1228.11
mITSAAGIISLLDEDEPQLK	UniProtKB:Q99460	M1(Oxidation)			5.42207e+09	0	4.21727e-05	128.71	4.28185e-11	2	1080.56
QVLMGPYNPDTcPEVGFFDVLGNDR	UniProtKB:Q9H3P7	C12(Carbamidomethyl)			239600225	0	6.13812e-08	128.64	8.38281e-11	2	1420.66
LIEAEDNMNcQmSNITVTYR	UniProtKB:P62318	C10(Carbamidomethyl); M12(Oxidation)			264002424	0	5.72966e-06	128.63	7.84761e-11	2	1209.54
VGIGAFPTEQDNEIGELLQTR	UniProtKB:P30520				4211851544	0	9.99738e-06	128.55	5.33343e-11	2	1144.08
EcPSDEcGAGVFMASHFDR	UniProtKB:P62979	C2(Carbamidomethyl); C7(Carbamidomethyl)			20812925528	0	2.13439e-05	128.54	5.29464e-11	2	1086.44
LNSNTQVVLLSATMPSDVLEVTK	UniProtKB:P60842				7539892384	0	4.86136e-05	128.54	3.37441e-11	2	1230.16
GQASQITASNLVQNYK	UniProtKB:Q9BRX5				205737644	0	1.84357e-05	128.5	4.56673e-11	2	861.447
DNMAQEGVILDDVDSSVcR	UniProtKB:Q9BV86	C18(Carbamidomethyl)			8.53636e+08	0	4.86136e-05	128.45	7.38667e-11	2	1061.97
QDLEAEVSQLTGEVAK	UniProtKB:O60610				7.44414e+08	0	4.86136e-05	128.42	5.3401e-11	2	858.938
VVVVDDLLATGGTMNAAcELLGR	UniProtKB:P07741	C18(Carbamidomethyl)			5745165924	0	3.3292e-05	128.41	5.29977e-11	3	792.075
EADIDGDGQVNYEEFVQMMTAK	UniProtKB:P62158				5030225655	0	2.3077e-06	128.41	8.31019e-11	2	1245.54
IMQSSSEVGYDAMAGDFVNMVEK	UniProtKB:P10809				5992267784	0	1.34453e-07	128.41	8.53949e-11	2	1254.56
VPQSVVDEEDSGLQSTLEASLELR	UniProtKB:Q8TDD1				270889868	0	5.98425e-08	128.38	6.01537e-11	2	1301.16
VMEMYQPSAVVLQcGADSLSGDR	UniProtKB:Q92769	C14(Carbamidomethyl)			502686812	0	1.86014e-06	128.33	8.49407e-11	2	1257.08
GPAVGIDLGTTYScVGVFQHGK	UniProtKB:P11142	C14(Carbamidomethyl)			9086384944	0	1.3633e-07	128.32	6.43989e-11	2	1132.06
TSIIATISPASLNLEETLSTLEYAHR	UniProtKB:P52732				1856278972	0	2.32651e-06	128.32	3.49821e-11	3	944.17
AAFQSLLDAQADEAVLDHPDLK	UniProtKB:Q9UBI1				1249423908	0	1.00411e-05	128.28	6.5084e-11	2	1184.09
NSTLQcETINSDNEDLLAR	UniProtKB:Q8IWJ2	C6(Carbamidomethyl)			173048996	0	1.36671e-05	128.26	7.75133e-11	2	1097.01
GDQPAASGDSDDDEPPPLPR	UniProtKB:O00264				1.35984e+08	0	4.86136e-05	128.17	7.32765e-11	2	1018.45
SLLQDAAIEEVEMEDFDANIEEQK	UniProtKB:P49750				251001022	0	1.23354e-06	128.12	9.45756e-11	2	1383.64
MPIPELDLSELEGLGLSDTATYK	UniProtKB:Q13015				507907820	0	2.21715e-07	128.1	5.61523e-11	2	1246.64
LLASEGSTMDEIDLESILGETK	UniProtKB:Q86WJ1				2.35162e+07	0	6.49177e-07	127.9	7.26409e-11	2	1176.08
KLGNNcVFAPADVTSEK	UniProtKB:Q99714	C6(Carbamidomethyl)			3367010178	0	4.23453e-06	127.86	6.56282e-11	2	925.462
VIPATDLSEQISTAGTEASGTGNMK	UniProtKB:P06737				3116513456	0	3.44304e-07	127.86	7.94838e-11	2	1239.61
TLASSSSSSSSSSGAETPK	UniProtKB:Q9Y467				2.53465e+08	0	2.36711e-05	127.82	7.25872e-11	2	879.407
SSDPLGDTASNLGSAVDELMR	UniProtKB:Q7Z6Z7				1292278520	0	1.59185e-06	127.82	8.3358e-11	2	1068
IITITGTQDQIQNAQYLLQNSVK	UniProtKB:P61978				19649704674	0	8.0334e-08	127.76	3.07436e-11	2	1295.2
EEDDVVSEDLVQQDVQDLYEAGELK	UniProtKB:P08133				1.58588e+08	0	6.67095e-07	127.74	1.03855e-10	2	1433.17
SGEEDFESLASQFSDcSSAK	UniProtKB:Q13526	C16(Carbamidomethyl)			2165779511	0	1.45707e-05	127.7	7.81786e-11	2	1090.96
aAAVLSGPSAGSAAGVPGGTGGLSAVSSGPR	UniProtKB:Q8IZL8	N-Term(Acetyl)			3191074974	0	6.53186e-07	127.67	5.54387e-11	2	1304.68
LVTSGAESGNLNTSPSSNQTR	UniProtKB:Q8NHV4				2.07471e+07	0	2.9125e-06	127.64	8.18662e-11	2	1060.51
IVGLDQVTGMTETAFGSAYK	UniProtKB:P35580				3658510260	0	2.2056e-05	127.6	7.32831e-11	2	1044.52
AQLQQVEAALSGNGENEDLLK	UniProtKB:O75940				1.35467e+09	0	4.86136e-05	127.57	6.65904e-11	3	743.047
GLGTDEDSLIEIIcSR	UniProtKB:P07355;UniProtKB:A6NMY6	C14(Carbamidomethyl)			5919442876	0	4.86136e-05	127.56	7.56186e-11	2	889.437
IETVNESWNALATPSDK	UniProtKB:P21399				578429879	0	4.86136e-05	127.52	7.43269e-11	2	937.963
YVELFLNSTAGASGGAYEHR	UniProtKB:P31943				6031418688	0	3.05598e-05	127.48	8.78237e-11	2	1071.52
MLIAQEGLLcGGSAGSTVAVAVK	UniProtKB:P35520	C10(Carbamidomethyl)			516610346	0	5.56804e-07	127.47	4.26701e-11	2	1116.6
IEEVSDTSSLQPQASLK	UniProtKB:Q9H6T3				1533610400	0	1.39425e-05	127.29	6.50807e-11	2	916.471
EFGDQAEAAQDATLTTTTFQNEDEK	UniProtKB:Q9BPX3				419107479	0	2.06314e-06	127.18	1.18378e-10	2	1380.62
AVQLTQAMDTSTVGVLLAAK	UniProtKB:O94979				490682098	0	4.86136e-05	127.17	3.30011e-11	2	1009.06
EGQGEGETQEAAAATAAAR	UniProtKB:P58107				120744793	0	2.25418e-05	127.1	8.87667e-11	2	909.42
NIADLMTQAGVEELESENK	UniProtKB:O75506				1.7269e+09	0	6.30418e-06	127.04	9.49934e-11	2	1046
ALDVGSGSGILTAcFAR	UniProtKB:P22061	C14(Carbamidomethyl)			2880887312	0	4.86136e-05	127.02	7.40714e-11	2	847.932
DQQEAALVDmVNDGVEDLR	UniProtKB:P09211	M10(Oxidation)			1.73308e+09	0	4.86136e-05	126.98	1.02338e-10	2	1067
NYGSYSTQASAAAATAELLK	UniProtKB:O14828				1053818436	0	1.5878e-05	126.95	8.62953e-11	2	1009
DLNSQADSLMTSSAFDTSQVK	UniProtKB:Q13813				847701560	0	1.06447e-05	126.91	1.09786e-10	2	1123.02
NSGScLGGDEIFLLcDK	UniProtKB:Q04206	C5(Carbamidomethyl); C15(Carbamidomethyl)			541328940	0	4.86136e-05	126.88	9.67431e-11	2	942.925
LTSSVScALDEAAAALTR	UniProtKB:O75179;UniProtKB:Q8IWZ3	C7(Carbamidomethyl)			1.55453e+09	0	4.81586e-05	126.87	7.95116e-11	2	918.466
QIDSSPVGGETDETTVSQNYR	UniProtKB:O15027				196948771	0	2.61007e-06	126.81	1.14282e-10	2	1142.02
INNAcFEAVVVTNTIPQEDK	UniProtKB:P60891	C5(Carbamidomethyl)			1377983124	0	1.40125e-05	126.77	9.55115e-11	2	1131.56
LVEDNPSSLSLVEIYK	UniProtKB:Q9Y4A5				181640424	0	4.86136e-05	126.76	5.37806e-11	2	903.485
mGGGGAmNMGDPYGSGGQK	UniProtKB:P23246	M1(Oxidation); M7(Oxidation)			982007776	0	1.15426e-05	126.7	6.55499e-11	2	902.358
HLVMGDIPAAVNAFQEAASLLGK	UniProtKB:P49321				27881971320	0	4.65667e-09	126.68	5.48878e-11	2	1176.63
ERLEQQVPVNQVFGQDEMIDVIGVTK	UniProtKB:P39023				7019822272	0	6.90316e-07	126.68	7.74185e-11	2	1486.26
VAALENQISEVSELLGTYEK	UniProtKB:Q96CN9				154441872	0	2.19145e-05	126.62	6.67141e-11	2	1097.07
DIAQQLQATcTSLGSSIQGLPTNVK	UniProtKB:O60664	C10(Carbamidomethyl)			1996104216	0	1.47591e-05	126.62	7.12656e-11	2	1315.68
VAGTGEGGLEEmVEELNSGK	UniProtKB:Q9UJU6	M12(Oxidation)			362199277	0	4.86136e-05	126.61	1.0679e-10	2	1011.47
HDSEQDNSDNNTIFVQGLGENVTIESVADYFK	UniProtKB:P35637				139994174	0	8.06299e-07	126.58	1.50389e-10	3	1195.88
VYAPASTLVDQPYANEGTVVVTER	UniProtKB:Q14126				581618114	0	3.99364e-08	126.57	8.25106e-11	2	1290.16
MSVQPTVSLGGFEITPPVVLR	UniProtKB:P06748				132954690404	0	2.79874e-05	126.56	3.89161e-11	2	1114.11
QLSAQGQMTQLcELINK	UniProtKB:Q9UNS2	C12(Carbamidomethyl)			9.18688e+08	0	4.86136e-05	126.47	8.9358e-11	2	981.496
IYLTADNLVLNLQDESFTR	UniProtKB:Q99623				5268895232	0	7.0451e-06	126.47	6.58012e-11	2	1113.08
VSTNGSDDPEDAGAGENR	UniProtKB:Q96J02				4.26411e+07	0	9.16695e-06	126.37	9.24314e-11	2	895.877
mLGETcADcGTILLQDK	UniProtKB:O60232	M1(Oxidation); C6(Carbamidomethyl); C9(Carbamidomethyl)			433627745	0	1.18344e-05	126.26	1.15989e-10	2	970.942
IFcGDLGNEVNDDILAR	UniProtKB:Q9BTD8	C3(Carbamidomethyl)			1547256938	0	4.86136e-05	126.2	1.12157e-10	2	960.962
EALGQAGVSETDNSSQDALGLSK	UniProtKB:Q13136				372996952	0	1.12479e-05	126.2	1.20673e-10	2	1139.05
cVLLSNLSSTSHVPEVDPGSAELQK	UniProtKB:P49327	C1(Carbamidomethyl)			5692064368	0	2.86602e-09	126.2	1.01591e-10	2	1334.17
NDQDTWDYTNPNLSGQGDPGSNPNK	UniProtKB:P14866				5328857616	0	5.72502e-07	126.18	1.43968e-10	2	1367.59
mVQQccTYVEEITDLPIK	UniProtKB:O00232	M1(Oxidation); C5(Carbamidomethyl); C6(Carbamidomethyl)			1289859152	0	2.00451e-05	126.16	1.29598e-10	2	1122.02
VDENFDcVEADDVEGK	UniProtKB:O14929	C7(Carbamidomethyl)			3554427580	0	4.86136e-05	126.11	9.25991e-11	2	920.883
MLVVLLQANRDPDAGIDEAQVEQDAQALFQAGELK	UniProtKB:P08758				8.4219e+08	0	1.43475e-08	126.06	7.85962e-11	3	1265.99
SDQLQQAVQSQGFINYcQK	UniProtKB:O94979	C17(Carbamidomethyl)			415625112	0	3.65796e-05	126.02	1.29368e-10	2	1121.53
DNLAQQSFNMEQANYTIQSLK	UniProtKB:Q9NZZ3				603665540	0	2.29239e-06	125.97	1.3528e-10	2	1222.08
ENPSEEAQNLVEFTDEEGYGR	UniProtKB:Q12874				391957552	0	7.0896e-07	125.92	1.4291e-10	2	1207.03
LcSLLDSEDYNTcEGAFGALQK	UniProtKB:Q92973	C2(Carbamidomethyl); C13(Carbamidomethyl)			2442715771	0	7.5875e-07	125.92	1.47976e-10	2	1246.06
GAVLVcDMSSNFLSKPVDVSK	UniProtKB:Q9Y617	C6(Carbamidomethyl)			5438704500	0	1.58038e-06	125.87	1.02881e-10	2	1127.07
LEDPDPGVQSAAVNVIcELAR	UniProtKB:O14617	C17(Carbamidomethyl)			4.72217e+07	0	3.13667e-07	125.86	1.05337e-10	2	1127.07
AAAASAAEAGIATTGTEDSDDALLK	UniProtKB:P55036				2573401914	0	2.53571e-06	125.79	1.29088e-10	2	1160.56
YFTQGNcVNLTEALSLYEEQLGR	UniProtKB:P52788	C7(Carbamidomethyl)			1139259572	0	3.58076e-06	125.78	1.42029e-10	2	1353.15
LAGGNDVGIFVAGVLEDSPAAK	UniProtKB:Q07157				853140168	0	1.33361e-05	125.77	7.92696e-11	2	1050.55
DGDVTVTNDGATILSMMDVDHQIAK	UniProtKB:P48643				13137077893	0	5.73285e-07	125.66	1.57961e-10	2	1323.62
EQVTNVGGAVVTGVTAVAQK	UniProtKB:P37840				454533084	0	6.79881e-06	125.61	4.85278e-11	2	964.534
AHSPMIAVGSDDSSPNAMAK	UniProtKB:Q96EE3				1463702256	0	1.24805e-05	125.59	1.36483e-10	2	993.458
NQGGYGGSSSSSSYGSGR	UniProtKB:P09651				11470178876	0	4.86136e-05	125.58	9.8766e-11	2	847.857
ETIEDVEEMLNNLPGVTSVHSR	UniProtKB:Q9UNM6				4.78575e+09	0	1.02932e-06	125.57	1.37363e-10	2	1235.1
TIMVNYNPETVSTDYDMcDR	UniProtKB:P27708	C18(Carbamidomethyl)			494939796	0	1.5871e-05	125.51	1.52855e-10	2	1212.52
FTLTQSEADADILFNFSHFK	UniProtKB:Q14166				2181328676	0	8.9454e-06	125.47	1.35567e-10	3	777.716
FGVSSSSSGPSQTLTSTGNFK	UniProtKB:P49790				331523904	0	4.86136e-05	125.46	1.29252e-10	2	1038.51
mRPGAYSTGYGGYEEYSGLSDGYGFTTDLFGR	UniProtKB:P52597	M1(Oxidation)			630267462	0	2.4288e-08	125.46	1.96126e-10	3	1164.18
IYYSEETSSDQGNEDEEEPK	UniProtKB:P19174				363446746	0	1.55638e-06	125.4	1.348e-10	2	1174.98
GSSSGGGYSSGSSSYGSGGR	UniProtKB:CON_P35908;UniProtKB:P35908				54444593	0	4.86136e-05	125.39	9.22994e-11	2	870.854
LAASGEGGLQELSGHFENQK	UniProtKB:Q16643				10261645382	0	5.85774e-07	125.36	1.27329e-10	2	1036.51
MTLVASEDYGDTLAAIQGLLK	UniProtKB:Q13813				1829553154	0	9.93308e-06	125.35	8.36718e-11	2	1105.08
LVSSPccIVTSTYGWTANMER	UniProtKB:P08238	C6(Carbamidomethyl); C7(Carbamidomethyl)			8770134138	0	1.51611e-06	125.34	1.73475e-10	2	1216.56
DQVTAQEIFQDNHEDGPTAK	UniProtKB:P13010				13630944349	0	1.41124e-05	125.23	1.61595e-10	2	1122.02
GVITDQNSDGYcQTGTMSR	UniProtKB:P15924	C12(Carbamidomethyl)			1.84569e+08	0	4.32731e-05	125.19	1.42946e-10	2	1045.45
cQDVSAGSLQELALLTGIISK	UniProtKB:Q92621	C1(Carbamidomethyl)			580244028	0	1.76931e-06	125.14	7.56764e-11	2	1102.09
NPELSTQLIDIIHTAAAR	UniProtKB:Q9NXF1				1481005384	0	8.45427e-06	125.06	6.75863e-11	2	982.034
STIQNLESSSNQALNcK	UniProtKB:P16383	C16(Carbamidomethyl)			1.54371e+08	0	4.86136e-05	125.04	1.49426e-10	2	947.451
VILPVSVDEYQVGQLYSVAEASK	UniProtKB:Q00169				1308087432	0	2.87041e-06	124.98	7.84847e-11	2	1247.66
AIVNASEMDIQNVPLSEK	UniProtKB:O43482				410024892	0	7.28025e-06	124.88	1.12253e-10	2	979.503
EGcEAIVDTGTSLMVGPVDEVR	UniProtKB:P07339	C3(Carbamidomethyl)			2062959218	0	6.45451e-06	124.88	1.8265e-10	2	1167.54
VDSAATSGYEIGNPPDYR	UniProtKB:P24666				2002382984	0	4.61445e-05	124.85	1.55389e-10	2	956.445
FAGYVTSIAATELEDDDDDYSSSTSLLGQK	UniProtKB:O75533				9.43562e+08	0	2.24766e-05	124.85	2.11969e-10	3	1066.82
VVIEDEQLVLGASQEPVGR	UniProtKB:Q6IBS0				972232120	0	3.61675e-05	124.83	7.70828e-11	2	1019.55
LMSSNSTDLPLNIEcFMNDK	UniProtKB:Q92598	C15(Carbamidomethyl)			2862397803	0	1.03882e-05	124.83	1.85916e-10	2	1165.03
VTASGPGLSSYGVPASLPVDFAIDAR	UniProtKB:O75369				1895522534	0	2.54113e-06	124.83	1.08685e-10	2	1274.16
GNFGGSFAGSFGGAGGHAPGVAR	UniProtKB:P52272				85484312624	0	1.86195e-07	124.82	1.59729e-10	2	1017.98
DIFLDDGVDEQVLMELK	UniProtKB:P52655				707206692	0	4.86136e-05	124.77	1.43323e-10	2	989.991
EVQQLQENLDSTVTQLAAFTK	UniProtKB:Q14789				450006798	0	1.91659e-05	124.77	1.10281e-10	2	1182.11
TGQATVASGIPAGWMGLDcGPESSK	UniProtKB:P00558	C19(Carbamidomethyl)			6824760584	0	4.13489e-06	124.71	1.953e-10	2	1239.08
ELEFLSMANVELSSLAR	UniProtKB:Q9BTT0				7487443624	0	4.85803e-05	124.65	1.15376e-10	2	954.992
SGTLAcTGSLVNNTANDRK	UniProtKB:CON_P15636	C6(Carbamidomethyl)			137656599875	0	2.65631e-05	124.65	1.50167e-10	2	989.988
TcSMVGNGDTTSQDDcVSK	UniProtKB:Q6NYC1	C2(Carbamidomethyl); C16(Carbamidomethyl)			162275182	0	1.50153e-05	124.63	1.24844e-10	2	1031.41
TVAGGAWTYNTTSAVTVK	UniProtKB:P61513				1906580260	0	4.86136e-05	124.6	1.1959e-10	2	913.97
EIADLGEALATAVIPQWQK	UniProtKB:P49588				5280698477	0	1.12292e-05	124.58	7.32902e-11	2	1027.06
VTTMDAELEFAIQPNTTGK	UniProtKB:P15311;UniProtKB:P26038;UniProtKB:P35241				2193778932	0	3.72542e-05	124.5	1.63551e-10	2	1033.5
GIGmGNIGPAGMGMEGIGFGINK	UniProtKB:P52272	M4(Oxidation)			1180992708	0	9.71403e-06	124.47	1.80655e-10	2	1097.53
NDIEEQETLLGTIMPEEESAK	UniProtKB:Q92878				244691796	0	2.18112e-06	124.47	1.92767e-10	2	1188.56
GPVKPTGGPGGGGTQTQQQMNQLK	UniProtKB:P26196				8650064649	0	4.5531e-06	124.42	1.39342e-10	3	789.403
QTIGNScGTIGLIHAVANNQDK	UniProtKB:P09936	C7(Carbamidomethyl)			615569152	0	2.20684e-06	124.38	1.52777e-10	2	1156.08
IFLLGLADNEAAIVQAESEETK	UniProtKB:Q9UHB9				2550415172	0	3.39395e-06	124.32	1.12909e-10	2	1181.12
GLDYYTGVIYEAVLLQTPAQAGEEPLGVGSVAAGGR	UniProtKB:P12081				1.80411e+08	0	1.78872e-07	124.31	1.16561e-10	3	1207.96
EAAAAAAAAVAAAAAAAAAAEPYPVSGAK	UniProtKB:Q6P6C2				2.14367e+09	0	6.50199e-07	124.29	1.22945e-10	2	1227.64
IVAQLLTcMDDLNNVAATAR	UniProtKB:O15381	C8(Carbamidomethyl)			700505658	0	3.61737e-05	124.24	1.40906e-10	2	1095.06
FFQSFSDALIDEDPQAALEELTK	UniProtKB:Q9Y2Z0				2.44132e+09	0	1.02542e-06	124.19	1.9362e-10	2	1307.63
IMMFIGGPATQGPGMVVGDELK	UniProtKB:Q15436				818862742	0	1.5507e-06	124.14	1.64619e-10	2	1124.56
aDVEDGEETcALASHSGSSGSK	UniProtKB:Q9UBF6	N-Term(Acetyl); C10(Carbamidomethyl)			3.04612e+08	0	8.34755e-07	124.13	1.88566e-10	2	1118.47
SVDETTQAMAFDGIIFQGQSLK	UniProtKB:P26368				3846919904	0	1.78242e-05	124.13	1.83215e-10	2	1193.59
INLSEQTDITDLFGADLPVEGGK	UniProtKB:Q9NU22				367921054	0	1.95945e-07	124.1	1.56863e-10	2	1216.62
mAYVVDLDDEYADTDIPTTLIR	UniProtKB:Q13123	M1(Oxidation)			349465156	0	1.57812e-07	124.08	2.08416e-10	2	1273.11
KVDDDLGTIESLEEAK	UniProtKB:P35580				1044238700	0	1.44369e-05	124.03	1.60301e-10	2	881.439
EETVLATVQALQTASHLSQQADLR	UniProtKB:P04844				364466888	0	1.82952e-08	124.03	1.16475e-10	2	1305.18
TSLAGDTSNSSSPASTGAK	UniProtKB:Q9UPN3;UniProtKB:Q96PK2				3.04611e+08	0	2.89863e-05	123.98	1.72036e-10	2	869.914
GGAAGEDEAGGPEGDPEEEDSQAETK	UniProtKB:O75410				134707108	0	7.89236e-07	123.88	1.93949e-10	2	1266.51
IAFTDADDVAILTYVK	UniProtKB:Q9NYB0				592367028	0	4.86136e-05	123.8	1.18829e-10	2	877.967
ATPLSSTVTLSMSADVPLVVEYK	UniProtKB:P12004				1346296685	0	4.86136e-05	123.74	9.55442e-11	2	1204.65
VSEEAESQQQWDTSK	UniProtKB:Q01082				845051120	0	4.86136e-05	123.63	1.89813e-10	2	876.391
ITAEDcTMEVTPGAEIQDGR	UniProtKB:Q6UN15	C6(Carbamidomethyl)			218590872	0	9.21061e-06	123.6	2.27032e-10	2	1097
TYALFIGDTVLVDEDGPATVLTSVK	UniProtKB:Q9Y5B9				286020798	0	1.65615e-05	123.52	1.08223e-10	2	1312.7
NEDEEEEEEEKDEAEDLLGR	UniProtKB:Q9Y5B9				5199616776	0	2.58085e-08	123.48	2.20469e-10	2	1204
LEHEVFDAGEVFGIMQVEEVEEEEDEAAR	UniProtKB:Q14166				1.62414e+08	0	1.20157e-05	123.48	2.9615e-10	3	1112.51
EQSIcAAEEQPAEDGQGETNK	UniProtKB:Q9UGP8	C5(Carbamidomethyl)			1.70416e+08	0	2.095e-06	123.42	2.33818e-10	2	1145.99
VGSDMTSQQEFTScLK	UniProtKB:P40855	C14(Carbamidomethyl)			1699032956	0	4.86136e-05	123.41	1.9906e-10	2	909.405
NLSNEEMIQAADELEEMK	UniProtKB:Q15170				527604955	0	4.63008e-05	123.35	2.39536e-10	2	1047.47
RQDPGDNWEEGGGGGGGMEK	UniProtKB:Q9UKY7				2116587981	0	2.43315e-06	123.34	1.96038e-10	2	1016.92
GYGFcEYQDQETALSAMR	UniProtKB:P33240;UniProtKB:Q9H0L4	C5(Carbamidomethyl)			1234963164	0	3.01143e-05	123.34	2.12768e-10	2	1063.45
ALMLQGVDLLADAVAVTMGPK	UniProtKB:P10809				1018989283	0	2.77005e-05	123.3	7.77844e-11	2	1057.08
KLEGDSTDLSDQIAELQAQIAELK	UniProtKB:P35579				2010272144	0	6.73162e-09	123.27	1.44519e-10	2	1308.18
EEFASTcPDDEEIELAYEQVAK	UniProtKB:O00299	C7(Carbamidomethyl)			2400310508	0	6.64902e-06	123.22	2.77902e-10	2	1287.07
SDATADDLIDVVEGNR	UniProtKB:Q9Y295				2093891500	0	4.86136e-05	123.19	2.06237e-10	2	845.403
NADmSEDMQQDAVDcATQAMEK	UniProtKB:Q96FJ2	M4(Oxidation); C15(Carbamidomethyl)			0	0	2.07171e-07	123.15	1.64207e-10	2	1252.47
YKLDEDEDEDDADLSK	UniProtKB:O95218				5630683667	0	1.34282e-05	123.12	2.08223e-10	2	950.404
KLELSDNIISGGLEVLAEK	UniProtKB:Q9BTT0				2121509856	0	5.72139e-06	123.1	6.3157e-11	2	1014.57
TQTSDPAMLPTMIGLLAEAGVR	UniProtKB:O43175				286214352	0	1.07092e-05	123.07	1.52317e-10	2	1136.6
QNFTEPTAIQAQGWPVALSGLDMVGVAQTGSGK	UniProtKB:P17844				4.03343e+08	0	7.77496e-06	123.04	2.15198e-10	3	1120.23
GVVGPGPAAIAALGGGGAGPPVVGGGGGR	UniProtKB:P22059				3594236466	0	3.6041e-08	122.99	8.97184e-11	2	1141.63
mTLVASEDYGDTLAAIQGLLK	UniProtKB:Q13813	M1(Oxidation)			6.77998e+08	0	8.48294e-06	122.96	1.65354e-10	2	1113.08
TDEFQLHTNVNDGTEFGGSIYQK	UniProtKB:P21796				411022848	0	5.54933e-06	122.95	2.98795e-10	2	1300.6
AQLSDYSDIVTTLDLAPPTK	UniProtKB:O60216				4.66615e+08	0	2.63949e-06	122.92	1.63693e-10	2	1074.56
NADMSEDMQQDAVDcATQAMEK	UniProtKB:Q96FJ2	C15(Carbamidomethyl)			233651280	0	5.15409e-06	122.92	2.23959e-10	2	1244.5
GPPIEDAIASSDVLETASK	UniProtKB:Q9Y450				1286939606	0	7.34855e-06	122.91	1.83464e-10	2	950.485
mQMLEDEDDLAYAETEK	UniProtKB:Q14204	M1(Oxidation)			727568796	0	4.86136e-05	122.88	2.16525e-10	2	1023.93
mTGGGFGGcTVTLLEASAAPHAMR	UniProtKB:P51570	M1(Oxidation); C9(Carbamidomethyl)			1792233444	0	6.74463e-06	122.82	2.88128e-10	3	803.38
VIHDNFGIVEGLMTTVHAITATQK	UniProtKB:P04406				6.29494e+10	0	2.62366e-08	122.8	1.29811e-10	2	1298.19
DTLDYSSNTMESALQYEK	UniProtKB:P49589				278170720	0	4.86136e-05	122.73	2.68881e-10	2	1047.96
SLTFSPDSQLLVTASDDGYIK	UniProtKB:Q9GZS3				1759667528	0	4.58437e-05	122.66	2.21191e-10	2	1129.07
LEDTENWLYEDGEDQPK	UniProtKB:P34932				5170828352	0	4.86136e-05	122.63	2.62728e-10	2	1040.95
HSQAVEELAEQLEQTK	UniProtKB:P35579				2236519048	0	1.17913e-05	122.61	2.24492e-10	2	920.457
VLAVNQENEQLMEDYEK	UniProtKB:P12814				2792069256	0	4.86136e-05	122.57	2.71086e-10	2	1026.48
DTAEGVSQELISAGLVDGR	UniProtKB:O95747				255819970	0	3.68111e-05	122.51	2.26719e-10	2	958.982
EQALSTLQLEHTSTQALVSELLPAK	UniProtKB:Q14980				950694368	0	3.32242e-06	122.5	9.73975e-11	2	1354.24
QQLSSLITDLQSSISNLSQAK	UniProtKB:Q14980				247005073	0	7.59397e-06	122.45	1.34818e-10	2	1131.11
SVASQFFTQEEGPGIDGMTTSER	UniProtKB:Q92797				379977956	0	1.69033e-06	122.44	3.38649e-10	2	1237.56
NQLDQEVEFLSTSIAQLK	UniProtKB:Q99471				3384436953	0	4.86136e-05	122.43	1.77187e-10	2	1032.04
VISLQEcLDEANAALDSASR	UniProtKB:Q15643	C7(Carbamidomethyl)			111924710	0	1.01349e-05	122.43	2.80567e-10	2	1081.52
VTGEADVEFATHEDAVAAMSK	UniProtKB:P31943				13806720168	0	3.7311e-08	122.36	3.03856e-10	2	1089.51
VGDTLGDSSSSVLEFMSMK	UniProtKB:Q9H8M2				100918016	0	8.67096e-06	122.31	2.89926e-10	2	995.465
ASLLSFQDEEEENEEVFK	UniProtKB:Q9Y5B6				251336172	0	4.86136e-05	122.31	3.10371e-10	2	1071.99
cDQDAQNPLSAGLQGAcLMETVELLQAK	UniProtKB:Q13561	C1(Carbamidomethyl); C17(Carbamidomethyl)			258978302	0	2.80749e-06	122.31	3.44386e-10	3	1020.82
VQASLAANTFTITGHAETK	UniProtKB:P20290				8670493052	0	1.74959e-06	122.29	1.81989e-10	2	980.514
ATAPVPTVGEGYGYGHESELSQASAAAR	UniProtKB:Q9BWF3				3788056320	0	1.9586e-08	122.28	3.17905e-10	2	1388.67
LVYSTcSLcQEENEDVVR	UniProtKB:Q96P11	C6(Carbamidomethyl); C9(Carbamidomethyl)			89316966	0	4.86136e-05	122.25	3.25768e-10	2	1101
LGGSLADSYLDEGFLLDK	UniProtKB:P78371				10460902976	0	4.86136e-05	122.18	2.45042e-10	2	956.978
NQGDEEGTEIDTLQFR	UniProtKB:O15160				1356457588	0	4.86136e-05	122.15	2.93522e-10	2	926.423
LDGNELDLSLSDLNEVPVK	UniProtKB:Q96AG4				7.6058e+08	0	3.5581e-05	122.14	1.97976e-10	2	1035.54
SQQAAQSADVSLNPcNTPQK	UniProtKB:P49454	C15(Carbamidomethyl)			51689783	0	4.86136e-05	122.12	2.96907e-10	2	1072.52
AEAGPESAAGGQEEEEGEDEEELSGTK	UniProtKB:Q8N5A5				143259954	0	2.29592e-07	122.12	3.55276e-10	2	1368.08
FTDDTFDPELAATIGVDFK	UniProtKB:Q9NP72				320861652	0	4.86136e-05	122.1	3.02502e-10	2	1051.5
TcSPASLSQASADLEATLR	UniProtKB:Q14258	C2(Carbamidomethyl)			952020964	0	4.86136e-05	122.09	2.71216e-10	2	989.487
aSVSELAcIYSALILHDDEVTVTEDK	UniProtKB:P05386	N-Term(Acetyl); C8(Carbamidomethyl)			335123991	0	8.315e-08	122.09	3.11851e-10	2	1460.71
cGIGQEEMEASSSQDQSK	UniProtKB:Q9C0C2	C1(Carbamidomethyl)			4.51232e+07	0	2.39449e-05	122.07	2.53842e-10	2	985.91
VFEVSLADLQNDEVAFRK	UniProtKB:P61247				7003847840	0	4.86136e-05	122.04	2.19811e-10	2	1040.53
ELEDLEGYQNTIVAGSLITK	UniProtKB:O75400				1.46194e+09	0	1.89332e-06	122.03	1.98449e-10	2	1097.07
NVFIAQNVASLQELGGSEK	UniProtKB:Q5T4S7				324602956	0	4.86136e-05	121.93	1.60463e-10	2	1002.54
SIDGTADDEDEGVPTDQAIR	UniProtKB:Q9NTI5				62156970	0	4.86136e-05	121.88	3.30512e-10	2	1052.47
IPQDSIAEIYNQcEEQGMESPLPAEDDNAIR	UniProtKB:P57740	C13(Carbamidomethyl)			240681549	0	4.50829e-06	121.88	4.59817e-10	3	1178.2
TPQGPPEIYSDTQFPSLQSTAK	UniProtKB:Q9UKY7				1594924900	0	2.89112e-05	121.87	3.09169e-10	2	1196.59
SLMSISNAGSGLLSHSSTLTGSPIMEEK	UniProtKB:Q4VCS5				456680144	0	5.09595e-09	121.85	2.97338e-10	2	1417.7
NTNDANScQIIIPQNQVNR	UniProtKB:P50395;UniProtKB:P31150	C8(Carbamidomethyl)			2894215788	0	1.40813e-05	121.8	3.19941e-10	2	1100.04
EGDEVGTGITDDNEDENSANQIAGK	UniProtKB:Q96SY0				4.16938e+08	0	2.26961e-07	121.79	3.79781e-10	2	1289.55
LLMSGGGGYLLSGFTVAMDNLK	UniProtKB:Q9UJA5				334790417	0	3.90201e-06	121.78	2.54346e-10	2	1122.57
NDFQLIGIQDGYLSLLQDSGEVR	UniProtKB:P63241				4.46592e+08	0	9.08029e-06	121.71	2.63235e-10	2	1290.65
EEILENWNMFVGSQATNYGEDLTK	UniProtKB:Q15293				247136720	0	1.63406e-06	121.63	4.29796e-10	2	1394.64
AVELLGDIVQNcSLEDSQIEK	UniProtKB:P31930	C12(Carbamidomethyl)			1142726528	0	3.5873e-05	121.6	3.12846e-10	2	1180.59
DVASAMQQMLTEScK	UniProtKB:Q6UWE0	C14(Carbamidomethyl)			2.00619e+08	0	4.86136e-05	121.59	2.885e-10	2	849.877
mSVQPTVSLGGFEITPPVVLR	UniProtKB:P06748	M1(Oxidation)			109036665128	0	2.46438e-05	121.57	1.39256e-10	2	1122.11
IcDQISDAVLDAHLQQDPDAK	UniProtKB:P31153	C2(Carbamidomethyl)			16113935536	0	1.8637e-07	121.56	3.72716e-10	2	1176.56
SITIIGGGFLGSELAcALGR	UniProtKB:O95831	C16(Carbamidomethyl)			465224428	0	1.25571e-05	121.55	1.41543e-10	2	996.541
KLTELSMQDEELMK	UniProtKB:P62072				801750366	0	4.86136e-05	121.54	2.8679e-10	2	847.923
EVAEAATGEDASSPPPK	UniProtKB:Q99536				8.09278e+08	0	4.86136e-05	121.53	2.99157e-10	2	828.392
SNASLTNNQNLIQSLK	UniProtKB:P12270				536636455	0	4.86136e-05	121.48	1.95299e-10	2	872.967
NYAEYQVcLAAVGLVGDLcR	UniProtKB:Q14974	C8(Carbamidomethyl); C19(Carbamidomethyl)			1757352575	0	1.37052e-05	121.45	3.44501e-10	2	1136.05
TSLFEEDEEDDLFAIAK	UniProtKB:Q641Q2;UniProtKB:Q5SNT6				286870887	0	2.04179e-05	121.44	3.47879e-10	2	986.462
DLcDGQLEGAEIGSTEITFTPEK	UniProtKB:O00442	C3(Carbamidomethyl)			164475799	0	4.11572e-06	121.42	4.16259e-10	2	1255.58
mLIAQEGLLcGGSAGSTVAVAVK	UniProtKB:P35520	M1(Oxidation); C10(Carbamidomethyl)			685418292	0	1.42577e-07	121.38	2.13967e-10	2	1124.59
VIEGLDTGLQGMcVGER	UniProtKB:Q96AY3	C13(Carbamidomethyl)			616581574	0	4.86136e-05	121.37	3.09217e-10	2	917.449
TEDSNAGNSGGNVPAPDSTK	UniProtKB:Q08378				1.90045e+08	0	1.70852e-06	121.35	3.46626e-10	2	959.425
SPLMSEFQSQISSNPELAAIFESIQK	UniProtKB:Q86VP6				140810644	0	4.86136e-05	121.3	3.18282e-10	2	1441.22
LVGPEGFVVTEAGFGADIGMEK	UniProtKB:P11586				1466632684	0	2.9208e-06	121.27	3.2325e-10	2	1112.06
YMSVNQAAQQLLEIVQNQR	UniProtKB:Q9H2P9				1428638816	0	4.86136e-05	121.27	2.54875e-10	2	1117.08
ASGPGLNTTGVPASLPVEFTIDAK	UniProtKB:P21333				3135937712	0	4.86136e-05	121.24	2.2248e-10	2	1171.62
ASEIMVDDEELAQHPATTEDIR	UniProtKB:Q8IY81				3619926364	0	1.56095e-07	121.17	4.42223e-10	2	1235.57
VNIEGGAIALGHPLGASGcR	UniProtKB:Q9BWD1	C19(Carbamidomethyl)			10467887104	0	1.55235e-05	121.15	2.44827e-10	2	975.006
GPGASGEQPEPGEAAAGGAAEEAR	UniProtKB:Q9H3P7				1651538452	0	6.64173e-08	121.15	4.05167e-10	2	1083.49
FIDPLAKEEENVGIDITEPLYMQR	UniProtKB:P33991				1865923480	0	7.64575e-08	121.11	3.16639e-10	2	1410.71
GPFVEAEVPDVDLEcPDAK	UniProtKB:Q09666	C15(Carbamidomethyl)			67685406	0	4.86136e-05	121.1	3.90064e-10	2	1043.99
KMEDSVGcLETAEEVK	UniProtKB:P35579	C8(Carbamidomethyl)			2912245596	0	1.35874e-05	121.09	3.60542e-10	2	912.924
ESTLEAIGYIcQDIDPEQLQDK	UniProtKB:Q14974	C11(Carbamidomethyl)			3166205612	0	4.86136e-05	121.08	4.26138e-10	2	1283.11
VQAEDEANGLQTTPASR	UniProtKB:P30622				94704448	0	1.71467e-05	121.05	3.42127e-10	2	893.937
DQQEAALVDMVNDGVEDLR	UniProtKB:P09211				21388957030	0	2.25914e-05	121.03	4.07525e-10	2	1059
SFDSMISTNcTEELENAGVEVLK	UniProtKB:P00390	C10(Carbamidomethyl)			360186810	0	2.63079e-06	120.96	4.64572e-10	2	1287.09
IIENAENEYQTAISENYQTMSDTTFK	UniProtKB:P52907				1354687200	0	4.86136e-05	120.95	5.24381e-10	3	1014.13
AEGSSTASSGSQLAEGK	UniProtKB:Q9NZB2				107406755	0	3.05183e-05	120.88	3.29042e-10	2	783.87
VAVGQDDLTVVLNEEGIcTQK	UniProtKB:Q96JC1	C18(Carbamidomethyl)			0	0	5.07658e-06	120.88	2.99522e-10	2	1144.59
DQMEYMLQNHVFPLFSSELGYMR	UniProtKB:O95373				3106514206	0	2.75333e-05	120.87	5.1948e-10	2	1418.15
DQVAIHEAMEQQTISITK	UniProtKB:Q14566				593793899	0	2.32499e-06	120.86	3.18584e-10	2	1021.52
AINcATSGVVGLVNcLR	UniProtKB:P49327	C4(Carbamidomethyl); C15(Carbamidomethyl)			10416394596	0	4.86136e-05	120.85	2.71792e-10	2	902.467
ALFcGVAcALDSDGTLVLDPTSK	UniProtKB:Q9NQT4	C4(Carbamidomethyl); C8(Carbamidomethyl)			222686224	0	2.24556e-07	120.85	4.11121e-10	2	1205.59
LESVSEDPTQLEEVEK	UniProtKB:Q96KG9				925786602	0	4.86136e-05	120.82	3.64791e-10	2	916.446
WNTDNTLGTEIAIEDQIcQGLK	UniProtKB:P45880	C18(Carbamidomethyl)			1030607040	0	1.84193e-06	120.82	4.11694e-10	2	1260.12
FGLNTVLTTDNSDLFINSIGIVPSVR	UniProtKB:Q9UHG3				574984160	0	6.4988e-08	120.82	1.61366e-10	2	1396.75
AVcMLSNTTAIAEAWAR	Ensembl:CON_ENSBTAP00000016242;UniProtKB:Q71U36;UniProtKB:P68363;UniProtKB:Q13748;UniProtKB:Q6PEY2;UniProtKB:P68366;UniProtKB:Q9NY65	C3(Carbamidomethyl)			35061803036	0	4.86136e-05	120.79	3.69196e-10	2	932.958
EILVGDVGQTVDDPYATFVK	UniProtKB:P23528				63564319244	0	1.10253e-05	120.78	2.93464e-10	2	1083.56
mNAQETATGMAFEEPIDEK	UniProtKB:O43719	M1(Oxidation)			1137579024	0	5.58193e-06	120.74	4.10746e-10	2	1064.46
MTVDESGQLIScSMDDTVR	UniProtKB:O75083	C12(Carbamidomethyl)			1126867210	0	1.1626e-05	120.69	4.16441e-10	2	1072.46
NFLYDIAGcSGTFTVQNR	UniProtKB:P49915	C9(Carbamidomethyl)			351656104	0	4.85941e-05	120.68	4.2655e-10	2	1031.99
LADSGDGAGPSPEEK	UniProtKB:Q92917				737974893	0	4.86136e-05	120.66	3.1732e-10	2	715.328
TSIDAYDNFDNISLAQRLEK	UniProtKB:Q00610				2247814032	0	2.75753e-05	120.65	3.7492e-10	2	1157.08
ELLVSALQELESSTSNSPSNK	UniProtKB:Q8WTW3				2.68586e+08	0	5.94136e-06	120.63	3.28299e-10	2	1117.07
EAGEGGEAEAPAAEGGK	UniProtKB:P29966				1.47031e+09	0	4.86136e-05	120.62	3.12626e-10	2	765.341
AQQNNVEHKVETFSGVYK	UniProtKB:P62081				5543924816	0	6.6346e-06	120.61	3.65528e-10	2	1039.52
mSSFGDFVALSDVcDVPTAK	UniProtKB:P31939	M1(Oxidation); C14(Carbamidomethyl)			3660157984	0	6.75709e-06	120.6	4.57561e-10	2	1081.49
VNEASGDGDGEDAVVILEK	UniProtKB:Q96C86				1123831768	0	1.93428e-05	120.58	4.06649e-10	2	958.961
QLTVQMMQNPQILAALQER	UniProtKB:P55209				5500201233	0	1.36072e-05	120.58	2.34189e-10	2	1106.59
LQNGLQALLISDLSNMEGK	UniProtKB:O43847				431577411	0	8.82697e-06	120.57	2.32361e-10	2	1022.54
IVEFLQSFDEITAMTGDGVNDAPALK	UniProtKB:P16615				1.13548e+08	0	2.77784e-07	120.57	4.10656e-10	2	1391.19
VcEDLDTSVNLAWTSGTNcTR	UniProtKB:P45880	C2(Carbamidomethyl); C19(Carbamidomethyl)			2.02611e+08	0	1.09141e-07	120.55	5.01052e-10	2	1200.03
mEDTSFPSGGNAIGVNSASSK	UniProtKB:Q8N8S7	M1(Oxidation)			1972333632	0	7.47179e-06	120.54	4.5015e-10	2	1036.47
VNAEGSVDSVFSQVcTHLDALK	UniProtKB:P00568	C15(Carbamidomethyl)			4209207058	0	5.69153e-07	120.52	4.21488e-10	2	1188.58
EAIVTSEELGQDLEHVEVLQK	UniProtKB:Q13813				5209532431	0	1.79057e-06	120.51	2.82944e-10	2	1183.62
HILGFDTGDAVLNEAAQILR	UniProtKB:Q9Y224				6702154711	0	1.43347e-07	120.48	2.31765e-10	2	1077.07
SEDPPGQEAGSEEEGSSASGLAK	UniProtKB:O75153				1848857668	0	2.49608e-07	120.48	4.65411e-10	2	1109.99
VcLLGcGISTGYGAAVNTAK	UniProtKB:P11766	C2(Carbamidomethyl); C6(Carbamidomethyl)			1292640132	0	4.86136e-05	120.46	3.45812e-10	2	1006.51
TWYVQATcATQGTGLYDGLDWLSHELSK	UniProtKB:P84085	C8(Carbamidomethyl)			5.24676e+08	0	2.41634e-05	120.45	5.58839e-10	3	1067.5
ILATGANVILTTGGIDDMcLK	UniProtKB:P17987	C19(Carbamidomethyl)			8163841220	0	2.86007e-06	120.41	2.84575e-10	2	1088.57
AcANPAAGSVILLENLR	UniProtKB:P00558	C2(Carbamidomethyl)			52653840944	0	4.86136e-05	120.34	2.27846e-10	2	884.976
FEALAAHDALVELSGAMNTTAcSLMK	UniProtKB:P07954	C22(Carbamidomethyl)			221474140	0	8.18587e-07	120.31	5.00331e-10	2	1376.16
QLTVQMmQNPQILAALQER	UniProtKB:P55209	M7(Oxidation)			329146460	0	4.86136e-05	120.29	2.7515e-10	2	1114.59
NATDLQNSSMSEEELTK	UniProtKB:P40855				598399000	0	4.86136e-05	120.27	4.49752e-10	2	948.93
KFDLGQDVIDFTGHALALYR	UniProtKB:P50395;UniProtKB:P31150				6164168904	0	8.09599e-07	120.26	2.65377e-10	2	1140.1
TGSINISVWDDVGNLIQPGDIIR	UniProtKB:Q9BQ15				123451284	0	4.86136e-05	120.23	2.92587e-10	2	1241.65
VDATEESDLAQQYGVR	UniProtKB:P07237				3085895680	0	4.86136e-05	120.2	4.27693e-10	2	890.923
DTSATSQSVNGSPQAEQPSLESTSK	UniProtKB:Q86WB0				169829206	0	4.86136e-05	120.18	5.35681e-10	2	1268.6
VANQDLQVQLDQALQQALDPNSK	UniProtKB:Q96EA4				5.86006e+08	0	1.31672e-06	120.17	3.14159e-10	2	1268.66
KLMSSNSTDLPLNIEcFMNDK	UniProtKB:Q92598	C16(Carbamidomethyl)			717833191	0	3.6476e-05	120.14	5.30713e-10	2	1229.08
ILQEAQNLMALTNVDTPLK	UniProtKB:Q99459				1609923522	0	9.21589e-06	120.13	1.91385e-10	2	1056.58
EVYEGEVTELTPcETENPMGGYGK	UniProtKB:Q9Y265	C13(Carbamidomethyl)			2213178827	0	3.49993e-06	120.11	5.86505e-10	2	1345.09
mQQNIQELEEQLEEEESAR	UniProtKB:P35579	M1(Oxidation)			1586589386	0	1.12796e-05	120.06	5.64596e-10	2	1175.03
ISTSLNPGNPVNNQIFLQEYVANLLK	UniProtKB:O14980				2646112740	0	7.53391e-08	120.05	1.83871e-10	2	1443.78
LPIVNEDDELVAIIAR	UniProtKB:P12268				1930783416	0	3.08907e-05	119.98	1.46172e-10	2	890.501
mGGGGAMNMGDPYGSGGQK	UniProtKB:P23246	M1(Oxidation)			4083767292	0	4.63405e-06	119.95	3.40599e-10	2	894.363
DIGEGNLSTAAAAALAAAAVK	UniProtKB:Q8TAQ2				1.32891e+09	0	3.28157e-05	119.89	2.56464e-10	2	943.006
ATTLSNAVSSLASTGLSLTK	UniProtKB:Q13492				2863310370	0	1.94405e-05	119.88	1.80417e-10	2	961.532
EAQTLcDELSVLIGEQYLK	UniProtKB:Q9UPN3;UniProtKB:Q96PK2	C6(Carbamidomethyl)			310741586	0	4.86136e-05	119.87	4.17564e-10	2	1105.06
SDMmEENIDTSAQAVAETK	UniProtKB:P82970	M4(Oxidation)			170609466	0	4.86136e-05	119.83	5.02957e-10	2	1043.45
EVNENFAIDLIAEQPVSEVETR	UniProtKB:O75380				76594819	0	4.86136e-05	119.72	4.68929e-10	2	1251.62
VLLQNTSFFSSLLNEMAHK	UniProtKB:Q9UI26				1235918544	0	5.20991e-06	119.71	3.2387e-10	3	727.049
MIINEELMASLDQPTQTVVMHR	UniProtKB:Q99613				3549942162	0	3.97597e-06	119.71	4.90803e-10	3	852.76
MLPTIIADNAGYDSADLVAQLR	UniProtKB:P78371				5564734584	0	3.13757e-06	119.68	3.69174e-10	2	1174.11
QDDGSSSASPSVQGAPR	UniProtKB:Q9NQA3				1.64283e+08	0	4.65649e-05	119.64	4.56788e-10	2	823.378
IVGNKWEAYLGLLQAEYTEGDALDALGLK	UniProtKB:P62875				7.61731e+07	0	5.50609e-06	119.64	2.38199e-10	3	1050.89
EVSQVDTIcEcLLEHEEQVLR	UniProtKB:Q8WUM0	C9(Carbamidomethyl); C11(Carbamidomethyl)			583214212	0	4.07019e-06	119.62	5.974e-10	2	1293.62
APVNTAELTDLLIQQNHIGSVIK	UniProtKB:Q9P287				1603479808	0	1.53792e-07	119.57	1.3133e-10	2	1237.69
DEGEGAAGAGDHKDPSLGAGEAASK	UniProtKB:Q02952				1628785720	0	1.4323e-05	119.56	5.91933e-10	2	1149
TLNASDVLSAMEEMEFQR	UniProtKB:Q9NRF9				2733306166	0	4.86136e-05	119.55	5.55308e-10	2	1035.98
LYIVFEGEEGQDAGGLLR	UniProtKB:Q7Z6Z7				524004020	0	4.86136e-05	119.53	4.08222e-10	2	983.501
DVLGTGAFSEVILAEDK	UniProtKB:Q14012				865627200	0	4.86136e-05	119.51	3.3807e-10	2	882.463
DcIGGcSDLVSLQQSGELLTR	UniProtKB:P35754	C2(Carbamidomethyl); C6(Carbamidomethyl)			1.14146e+09	0	1.22152e-06	119.46	5.86923e-10	2	1154.56
VGATAAVYSAAILEYLTAEVLELAGNASK	UniProtKB:Q71UI9;UniProtKB:P0C0S5				354365918	0	3.92336e-05	119.43	2.19327e-10	3	965.856
TPPPELLQTLTAVGGIGQLTAAK	UniProtKB:P42858				662247816	0	4.914e-07	119.41	8.46534e-11	2	1138.66
SSGTASSVAFTPLQGLEIVNPQAAEK	UniProtKB:Q8WWY3				245340806	0	4.79941e-07	119.39	3.47024e-10	2	1301.68
TYADYESVNEcMEGVcK	UniProtKB:P84090	C11(Carbamidomethyl); C16(Carbamidomethyl)			19752349416	0	4.86136e-05	119.37	4.23715e-10	2	1027.91
GQIIGNFQAFDEDTGLPAHAR	UniProtKB:Q14126				1303579336	0	4.86136e-05	119.34	5.31482e-10	3	753.041
WNSPAEEGSSDcEVFSK	UniProtKB:P34932	C12(Carbamidomethyl)			2581091512	0	4.86136e-05	119.33	4.94786e-10	2	964.903
QQLPTFLQQMQNPDTLSAMSNPR	UniProtKB:Q9UMX0				967686068	0	1.42801e-06	119.3	5.7664e-10	2	1323.15
GPYDVANLGLLFGLSESDAK	UniProtKB:P78346				368885914	0	2.84382e-06	119.28	4.44332e-10	2	1033.53
DAQDVQASQAEADQQQTR	UniProtKB:Q9P2E9				608330324	0	3.47031e-05	119.27	5.77265e-10	2	994.948
EGTGSTATSSSSTAGAAGK	UniProtKB:O15372				6.13038e+08	0	4.86136e-05	119.26	4.92035e-10	2	814.379
QEAGISEGQGTAGEEEEK	UniProtKB:O43583				2876129161	0	3.27911e-05	119.26	5.52805e-10	2	924.913
AcADATLSQITNNIDPVGR	UniProtKB:P62873	C2(Carbamidomethyl)			2406320646	0	2.12245e-06	119.26	5.06857e-10	2	1008.5
VLESTMVcVDNSEYMR	UniProtKB:P55036	C8(Carbamidomethyl)			1163410666	0	4.86136e-05	119.23	5.52578e-10	2	966.926
AEGSDVANAVLDGADcIMLSGETAK	UniProtKB:P14618	C16(Carbamidomethyl)			15221866125	0	8.27064e-07	119.22	7.00751e-10	2	1247.58
TESPATAAETASEELDNR	UniProtKB:Q9NTJ3				3.7056e+08	0	2.58659e-05	119.2	5.54003e-10	2	946.431
SLSVLSSSTIIANPDIPEAYK	UniProtKB:P27694				2074528156	0	3.09496e-05	119.19	2.92342e-10	2	1103.09
HNDDEQYAWESSAGGSFTVR	UniProtKB:P08238;UniProtKB:P07900;UniProtKB:Q14568				684245076	0	4.19979e-07	119.18	6.12966e-10	2	1128.48
HGEPEEDIVGLQAFQER	UniProtKB:O75694				590926896	0	2.18772e-07	119.14	5.62868e-10	2	977.471
STMDNPTTTQYASLMHSFILK	UniProtKB:Q9NP97				1675687772	0	8.67474e-06	119.14	6.29242e-10	2	1193.58
NADMQEELIASLEEQLK	UniProtKB:Q7Z3K3				228478551	0	4.86136e-05	119.12	5.40362e-10	2	980.983
ADDPSSYMEVVQAANTSGNWEELVK	UniProtKB:Q00610				2011844267	0	8.52687e-08	119.06	7.53683e-10	2	1370.63
VLEGMVEENQVNVEVTR	UniProtKB:Q14126				151526404	0	4.35617e-05	118.96	4.93999e-10	2	972.991
QWVDTDDTSSENTVVPPETYVK	UniProtKB:P15927				752828920	0	3.79016e-05	118.94	7.36824e-10	2	1255.58
EGILSDEIYcPPETAVLLGSYAVQAK	UniProtKB:P15311	C10(Carbamidomethyl)			902507228	0	5.37108e-07	118.93	5.89859e-10	2	1412.2
VIQGDGVDINTLQEIVEGmK	UniProtKB:P43490	M19(Oxidation)			121151396	0	1.7175e-05	118.91	4.52614e-10	2	1087.56
IATETDQIGSEIIEELGEQR	UniProtKB:Q9UEU0				133526549	0	1.83196e-05	118.91	5.38085e-10	2	1116.06
ALASGTEASSTDPGAPGGPGGAEGPMAK	UniProtKB:Q16763				762340789	0	3.48877e-05	118.87	7.06184e-10	2	1221.07
LEFDLSPLNLDIGQVYK	UniProtKB:Q9NRN7				982328772	0	4.86136e-05	118.81	3.40249e-10	2	982.523
QVFESDEAPDGNSYQDDQDDLK	UniProtKB:Q96N67				1.78092e+08	0	4.21839e-06	118.79	6.65338e-10	2	1258.02
YTNLSYIGEGAYGMVcSAYDNVNK	UniProtKB:P28482	C16(Carbamidomethyl)			544471164	0	2.7226e-07	118.79	8.09624e-10	2	1345.1
aAATGAVAASAASGQAEGK	UniProtKB:Q9NWH9	N-Term(Acetyl)			1594958136	0	1.13731e-05	118.76	5.21671e-10	2	815.911
NIQVDEANLLTWQGLIVPDNPPYDK	UniProtKB:P68036				1250616304	0	9.96286e-08	118.76	4.56279e-10	2	1426.74
EVAENQQNQSSDPEEEK	UniProtKB:O43491				2.74251e+08	0	2.09068e-05	118.73	6.19667e-10	2	980.923
LATMYSSGSPEGGSDSSESR	UniProtKB:Q9ULT8				287339166	0	4.86136e-05	118.73	6.25361e-10	2	1002.93
EVGDGTTSVVIIAAELLK	UniProtKB:P17987				1.31297e+08	0	4.86136e-05	118.59	1.82147e-10	2	908.015
TDLNPDNLQGGDDLDPNYVLSSR	UniProtKB:P12277				14534169968	0	4.95639e-06	118.57	7.83725e-10	2	1259.59
STVLSLDWHPNNVLLAAGScDFK	UniProtKB:Q92747;UniProtKB:O15143	C20(Carbamidomethyl)			977161512	0	8.36444e-08	118.56	6.30752e-10	2	1272.64
mSASDPNSSIFLTDTAK	UniProtKB:P23381	M1(Oxidation)			4080150560	0	3.83548e-05	118.49	6.52398e-10	2	900.924
LNSNTQVVLLSATmPSDVLEVTK	UniProtKB:P60842	M14(Oxidation)			4.08242e+08	0	4.86136e-05	118.47	2.92573e-10	2	1238.17
TVLSANADHMAQIEGLMDDVDFK	UniProtKB:Q9Y4L1				2056870924	0	1.56002e-08	118.45	8.0211e-10	2	1260.59
KVQSDGQIVLVDDWIK	UniProtKB:Q08211				415077500	0	4.86136e-05	118.42	2.65962e-10	2	922.009
RVVALSMSPVDDTFISGSLDK	UniProtKB:Q6UXN9				688569954	0	4.86136e-05	118.41	4.84983e-10	2	1119.08
GTGQSDDSDIWDDTALIK	UniProtKB:Q16637				239268756	0	4.86136e-05	118.35	6.99652e-10	2	968.944
LESGGGGEGGEGTEEEDGAER	UniProtKB:Q96LA8				2.43689e+07	0	5.75361e-06	118.33	5.69429e-10	2	1011.41
QGPVSQSATQQPVTADK	UniProtKB:Q9BTA9				269808985	0	4.86136e-05	118.32	5.40339e-10	2	871.441
TEQGEEEEEEEDEEEEEK	UniProtKB:P98175				175523288	0	1.96131e-05	118.29	4.16513e-10	2	1113.42
VIAVYDLGGGTFDISILEIQK	UniProtKB:P38646				2.79446e+08	0	8.00527e-06	118.27	2.29883e-10	2	1126.12
EVEPEPTEDKDLEADEEDTR	UniProtKB:A6NK07;UniProtKB:P20042				2191523944	0	4.33817e-06	118.27	8.27191e-10	2	1173.51
mLVVLLQANRDPDAGIDEAQVEQDAQALFQAGELK	UniProtKB:P08758	M1(Oxidation)			1704942780	0	5.7667e-10	118.27	5.4734e-10	3	1271.31
SVVcQESDLPDELLYGR	UniProtKB:Q9NS86	C4(Carbamidomethyl)			550017139	0	4.86136e-05	118.26	7.00718e-10	2	990.472
FNLDLTHPVEDGIFDSGNFEQFLR	UniProtKB:Q6P5R6				1589577926	0	2.25115e-05	118.25	8.48291e-10	3	937.451
FQYcVAVGAQTFPSVSAPSKK	UniProtKB:P55265	C4(Carbamidomethyl)			1229675008	0	3.98411e-06	118.24	5.87502e-10	3	758.055
GIAFPTSISVNNcVcHFSPLK	UniProtKB:Q9UQ80	C13(Carbamidomethyl); C15(Carbamidomethyl)			33234142496	0	3.84422e-05	118.24	6.60911e-10	2	1174.59
AAAPAPEEEmDEcEQALAAEPK	UniProtKB:P26641	M10(Oxidation); C13(Carbamidomethyl)			4503188868	0	4.86136e-05	118.19	8.28689e-10	2	1187.02
TGQATVASGIPAGWMGLDcGPESSKK	UniProtKB:P00558	C19(Carbamidomethyl)			10379904494	0	3.34392e-06	118.15	8.14462e-10	2	1303.13
GPVSGTEPEPVYSMEAADYR	UniProtKB:Q14247				685147152	0	5.39952e-07	118.12	7.8673e-10	2	1077.99
GILSGTSDLLLTFDEAEVRK	UniProtKB:P18206				1900841634	0	1.06876e-05	118.12	3.76329e-10	2	1082.58
AAQLIGTcSQNVAAIQEQVLGLGALR	UniProtKB:Q9NZL4	C8(Carbamidomethyl)			310879938	0	7.37881e-08	118.09	3.14514e-10	2	1341.22
SRDLLVQQASQcLSK	UniProtKB:Q1KMD3	C12(Carbamidomethyl)			1540207360	0	4.86136e-05	118.08	4.60644e-10	2	866.958
TLSFSSDNIAVLSAAADSIK	UniProtKB:Q9UNX4				445244624	0	2.41533e-06	118.08	4.4524e-10	2	1005.53
THSVNGITEEADPTIYSGK	UniProtKB:O75534				2525424196	0	2.62622e-07	118.03	7.47799e-10	2	1009.99
mQLSAELQSDTEEILSK	UniProtKB:O75643	M1(Oxidation)			2694707084	0	4.86136e-05	117.95	6.90117e-10	2	969.476
ALSVGNIDDALQcYSEAIK	UniProtKB:P31948	C13(Carbamidomethyl)			26708651234	0	3.43497e-05	117.95	7.06711e-10	2	1034.01
ETEEITSLWQGSLFNANYDVQR	UniProtKB:Q14696				47476388	0	1.41051e-05	117.94	8.95307e-10	2	1300.62
LQQQLTQAAQELAAEK	UniProtKB:Q15075				690508248	0	4.86136e-05	117.91	4.07028e-10	2	885.475
LMTIMDSMNDQELDSTDGAK	UniProtKB:P61011				183115114	0	1.54842e-05	117.91	8.25706e-10	2	1107.98
IPSQPLDASASGDVScVDEILK	UniProtKB:Q9UHB7	C16(Carbamidomethyl)			4.477e+07	0	1.45311e-06	117.87	7.82314e-10	2	1151.06
VNIAFNYDMPEDSDTYLHR	UniProtKB:Q13838				17822820560	0	2.53945e-05	117.84	9.16079e-10	2	1150.52
AQAALQAVNSVQSGNLALAASAAAVDAGMAMAGQSPVLR	UniProtKB:P26599				0	0	1.44013e-05	117.84	4.39952e-10	4	920.984
QNQTTSAVSTPASSETSK	UniProtKB:P49792				1.96731e+09	0	4.86136e-05	117.8	7.43661e-10	2	912.437
cPTDELSLTNcAVVNEK	UniProtKB:P46459	C1(Carbamidomethyl); C11(Carbamidomethyl)			859760004	0	3.33843e-05	117.75	8.03811e-10	2	975.457
AEEATEAQEVVEATPEGAcTEPR	UniProtKB:O75683	C19(Carbamidomethyl)			333513108	0	4.86136e-05	117.67	1.01412e-09	2	1237.55
TQLEELEDELQATEDAK	UniProtKB:P35579;UniProtKB:P35749;UniProtKB:P35580				15366681672	0	4.40042e-05	117.66	8.24071e-10	2	981.465
aDVLDLHEAGGEDFAMDEDGDESIHK	UniProtKB:Q9Y5S9	N-Term(Acetyl)			10815322232	0	1.62302e-06	117.66	1.06865e-09	3	953.078
EGGDGEEQDVGDAGR	UniProtKB:Q8N1G4				9.22388e+08	0	4.86136e-05	117.62	4.7864e-10	2	745.805
SSVGETVYGGSDELSDDITQQQLLPGVK	UniProtKB:O00267				689809752	0	8.76293e-08	117.62	8.20192e-10	2	1461.72
SLDLFNcEVTNLNDYR	UniProtKB:P39687;UniProtKB:Q92688	C7(Carbamidomethyl)			18506538590	0	4.86136e-05	117.61	8.65082e-10	2	986.957
IQAAASTPTNATAASDANTGDR	UniProtKB:P49841				1.05164e+08	0	2.45503e-05	117.61	8.50344e-10	2	1052.5
KETESEAEDNLDDLEK	UniProtKB:Q8IYB3				211559084	0	3.78938e-06	117.58	8.36249e-10	2	932.92
LERENAEVDGDDDAEEMEAK	UniProtKB:P05198				229168279	0	3.77273e-05	117.58	8.98749e-10	2	1132.98
NELMYQLEQDHDLQAILQER	UniProtKB:Q08211				15877467554	0	1.1214e-06	117.58	8.50303e-10	2	1243.61
mASNIFGTPEENQASWAK	UniProtKB:Q9UK76	M1(Oxidation)			2543268701	0	2.99338e-05	117.56	8.67119e-10	2	998.959
DLAVVTQSAEAPAEEDLLGPNcYYDK	UniProtKB:Q9BX40	C22(Carbamidomethyl)			316127604	0	1.40343e-05	117.55	1.05475e-09	2	1434.67
LPAVSSVAcGASVGYAVTK	UniProtKB:P18754	C9(Carbamidomethyl)			887141088	0	1.09744e-06	117.54	5.41103e-10	2	918.981
NSSAcENSGYFQQLEGK	UniProtKB:Q969T7	C5(Carbamidomethyl)			2.33868e+08	0	4.86136e-05	117.51	8.00337e-10	2	959.921
VTEGLVDVILYHQPDDK	UniProtKB:O43390				2.59248e+09	0	4.86136e-05	117.48	5.84449e-10	2	971.005
TVVSGScAAHSLLITTEGK	UniProtKB:Q9P258	C7(Carbamidomethyl)			1661580842	0	3.28376e-06	117.47	5.78634e-10	2	966.002
YGGPPPDSVYSGVQPGIGTEVFVGK	UniProtKB:O43390				3119242272	0	1.48341e-07	117.46	7.59531e-10	2	1254.13
FLDPDMYSLLEDSTSDLR	UniProtKB:Q9UHW5				1235401226	0	3.02207e-05	117.45	9.36312e-10	2	1058.99
STNGDTFLGGEDFDQALLR	UniProtKB:P38646				1157836698	0	3.36248e-05	117.43	8.91298e-10	2	1028.49
VTGQHPEVPPAFWNNAFTLLSAVSLPR	UniProtKB:Q9BVI4				981024535	0	9.62885e-06	117.43	4.14837e-10	3	983.525
LSAVLEDTENWLYEDGEDQPK	UniProtKB:O95757				1118965351	0	3.27046e-05	117.42	1.04369e-09	2	1226.07
LSSEVSGSGSGNFGEEGNPQGK	UniProtKB:O14654				2.37668e+08	0	9.63601e-06	117.39	9.46511e-10	2	1062.48
LPIDVTEGEVISLGLPFGK	UniProtKB:P26599				14387398800	0	2.18382e-06	117.36	2.61064e-10	2	992.556
NPSTVEAFDLAQSNSEHSR	UniProtKB:O15067				4510703688	0	3.42443e-06	117.35	9.22227e-10	2	1044.99
VGAIPANALDDGQWSQGLISAAR	UniProtKB:Q9Y490				2310014200	0	7.54258e-06	117.34	6.29704e-10	2	1155.6
FGQAATMEGIGAIGGTPPAFNR	UniProtKB:Q15233				15772239120	0	6.79015e-06	117.26	8.12335e-10	2	1082.04
FAGGDYTTTIEAFISASGR	UniProtKB:P07814				1408126328	0	4.86136e-05	117.25	8.58473e-10	2	982.478
NLPIENTTDcLSTMASVcR	UniProtKB:Q9NUQ9	C10(Carbamidomethyl); C18(Carbamidomethyl)			1010214028	0	4.86136e-05	117.25	9.84678e-10	2	1091.5
NVDmLSELVQEYDEPILK	UniProtKB:Q99733	M4(Oxidation)			656588034	0	4.86136e-05	117.21	8.36665e-10	2	1076.03
NLPQYVSNELLEEAFSVFGQVER	UniProtKB:Q15233				242897812	0	3.08184e-06	117.17	7.75334e-10	2	1334.67
ITVVGVGQVGMAcAISILGK	UniProtKB:P07195	C13(Carbamidomethyl)			11713089356	0	1.3226e-05	117.13	2.72939e-10	2	987.053
NLEALALDLmEPEQAVDLTLPK	UniProtKB:P12956	M10(Oxidation)			504544267	0	4.86136e-05	117.12	5.36849e-10	2	1220.14
VQFQDMcATIGVDPLASGK	UniProtKB:Q96H20	C7(Carbamidomethyl)			6.49132e+08	0	4.86136e-05	117.05	9.23981e-10	2	1018.99
LQLQEQLQAETELcAEAEELR	UniProtKB:P35579	C14(Carbamidomethyl)			153591382	0	5.93041e-06	117.05	9.48242e-10	2	1251.11
TILLSTTDPADFAVAEALEK	UniProtKB:P55196				564032288	0	1.41727e-05	117.01	5.45146e-10	2	1053.06
WQHDLFDSGFGGGAGVETGGK	UniProtKB:Q86V81				579603504	0	6.16253e-08	117.01	1.04819e-09	2	1061.49
FDGcYcDSLENLADGYK	UniProtKB:P06280	C4(Carbamidomethyl); C6(Carbamidomethyl)			2401236272	0	1.49324e-05	116.91	7.90372e-10	2	1013.91
AQDIEAGDGTTSVVIIAGSLLDScTK	UniProtKB:P50991	C24(Carbamidomethyl)			102400616	0	2.33507e-07	116.86	9.15744e-10	2	1311.16
RQIQAAYSILSEVQQAVSQGSSDSQILDLSNR	UniProtKB:P09874				361137388	0	5.96857e-07	116.86	6.2365e-10	3	1164.61
FDEFDEAIDEAIEDDIK	UniProtKB:Q96T23				255127697	0	4.00307e-05	116.84	1.0093e-09	2	1007.45
FSPDSTLLATcSADQTcK	UniProtKB:Q9BVC4	C11(Carbamidomethyl); C17(Carbamidomethyl)			419603992	0	4.86136e-05	116.83	1.02739e-09	2	1001.45
TVNELQNLTAAEVVVPR	UniProtKB:Q9NZI8				4867241688	0	4.86136e-05	116.82	3.62699e-10	2	927.012
SQAPLESSLDSLGDVFLDSGRK	UniProtKB:Q14980				1846881062	0	2.816e-06	116.74	8.24784e-10	3	774.395
IATTTASAATAAAIGATPR	UniProtKB:Q14980				838770500	0	4.86136e-05	116.71	4.32368e-10	2	858.472
ITENIGcVMTGMTADSR	UniProtKB:P60900	C7(Carbamidomethyl)			5488734304	0	4.86136e-05	116.66	1.00055e-09	2	928.422
KGIVDQSQQAYQEAFEISK	UniProtKB:P63104				453478798	0	4.87541e-07	116.66	8.6655e-10	2	1085.05
mVYSTcSLNPIEDEAVIASLLEK	UniProtKB:Q08J23	M1(Oxidation); C6(Carbamidomethyl)			4.54562e+08	0	8.547e-07	116.65	1.046e-09	2	1299.64
NLMESLDSLLcAEGSESLK	UniProtKB:Q5T2E6	C11(Carbamidomethyl)			5.19943e+07	0	1.92809e-05	116.61	1.06463e-09	2	1048.5
aAVATcGSVAASTGSAVATASK	UniProtKB:Q96EB1	N-Term(Acetyl); C6(Carbamidomethyl)			120453019	0	1.87292e-06	116.6	9.81649e-10	2	990.482
RGTGGVDTAAVGGVFDVSNADR	UniProtKB:P12277				5785343608	0	4.86136e-05	116.57	9.95723e-10	2	1061.02
NLSPVVSNELLEQAFSQFGPVEK	UniProtKB:Q8WXF1				1980518876	0	1.57239e-05	116.53	8.00169e-10	2	1266.65
LQENLQQLQHSTNQLAK	UniProtKB:Q86Y82				3256138302	0	1.9178e-05	116.52	5.6424e-10	2	997.032
KYSQFINFPIYVWSSK	UniProtKB:P14625				3660199907	0	1.26331e-05	116.51	6.66721e-10	2	1004.03
LSDQDLDQALSDEELNAFQK	UniProtKB:Q8IXI1				1.46545e+08	0	1.09577e-05	116.51	1.13499e-09	2	1140.05
VLLGSVSGLAGGFVGTPADLVNVR	UniProtKB:Q9UBX3				468665252	0	1.27517e-05	116.5	2.11559e-10	2	1149.65
GLPLGSAVSSPVLFSPVGR	UniProtKB:Q8WUM0				764562776	0	4.86136e-05	116.43	2.71078e-10	2	920.524
VLILGSGGLSIGQAGEFDYSGSQAIK	UniProtKB:P27708				366896902	0	5.22838e-07	116.43	6.26789e-10	2	1284.18
NTPVYVSSPTWENHNAVFSAAGFK	UniProtKB:P17174				1561438528	0	9.56754e-07	116.42	1.19638e-09	2	1312.14
DQAENEDGAQENTFSMDPQLER	UniProtKB:P50570				381152822	0	3.39751e-06	116.41	1.24577e-09	2	1262.53
GQESAGIVTSDGSSVPTFK	UniProtKB:Q06203				3510818098	0	2.19473e-05	116.36	1.01384e-09	2	933.959
GVGDGTVSWGLEDDEDMTLTR	UniProtKB:Q13404;UniProtKB:Q15819				1883388860	0	4.86136e-05	116.35	1.22903e-09	2	1127
LAQEPLGLEVDQFLEDVR	UniProtKB:Q9NZM5				1522353890	0	4.86136e-05	116.34	7.65342e-10	2	1036.04
YLQDSTFATSPHLESLLK	UniProtKB:Q9BW27				431723342	0	2.41099e-05	116.3	7.93404e-10	2	1025.53
TDTGRGNGPLPLGGSGLMEEMSALLAR	UniProtKB:Q8N8S7				734415136	0	8.59035e-07	116.23	1.0082e-09	3	900.786
VLSLETSVNELNSQLNESK	UniProtKB:Q15075				894172340	0	4.86136e-05	116.2	7.63788e-10	2	1052.55
aAAAVGAGHGAGGPGAASSSGGAR	UniProtKB:Q96K37	N-Term(Acetyl)			330671262	0	5.2583e-06	116.18	1.10386e-09	2	953.963
TGEMSGPVFTDSGIHIILR	UniProtKB:Q13526				1511409098	0	4.35798e-05	116.16	8.93481e-10	2	1015.52
SLETDSSLILDVPLGVISR	UniProtKB:Q13496				166568380	0	2.41291e-05	116.12	3.67248e-10	2	1007.56
NTGDADQWcPLLETLTDAEMEK	UniProtKB:Q12824	C9(Carbamidomethyl)			387026626	0	1.7393e-06	116.12	1.41731e-09	2	1269.07
GIIWGEDTLMEYLENPK	UniProtKB:P99999				15555467004	0	4.86136e-05	116.06	1.11967e-09	2	1004.49
GLcESVVEADLVEALEK	UniProtKB:Q8WVV9	C3(Carbamidomethyl)			2061852344	0	4.86136e-05	116	1.00601e-09	2	930.969
NLEAVETLGSTSTIcSDK	UniProtKB:P05023;UniProtKB:P50993;UniProtKB:P13637;UniProtKB:Q13733	C15(Carbamidomethyl)			2287149950	0	2.44719e-05	116	1.16803e-09	2	962.961
LAYVAAGDLAPINAFIGGLAAQEVmK	UniProtKB:P22314	M25(Oxidation)			588635220	0	2.00284e-07	115.99	5.49609e-10	2	1310.2
FSPLTTNLINLLAENGR	UniProtKB:P48047				495783748	0	4.86136e-05	115.92	5.1402e-10	2	937.014
QVEVDAQQcMLEILDTAGTEQFTAMR	UniProtKB:P61224	C9(Carbamidomethyl)			8.9736e+07	0	1.66855e-06	115.9	1.54185e-09	3	995.47
LLQTDDEEEAGLLELLK	UniProtKB:P55060				26849862864	0	1.16874e-05	115.85	7.36235e-10	2	965.01
VIVDANNLTVEIENELNIIHK	UniProtKB:Q8WWY3				1696479452	0	4.86136e-05	115.82	4.40771e-10	3	797.439
LALcSADSVAFPVLTHSTR	UniProtKB:Q14C86	C4(Carbamidomethyl)			2454999624	0	4.86136e-05	115.8	8.35373e-10	3	682.358
IDIDNSGYVSDYELQDLFK	UniProtKB:Q14651				283169668	0	4.86136e-05	115.8	1.36222e-09	2	1117.53
YLDGMDSDFTSMTSLLTGSVK	UniProtKB:Q9NYM9				104741564	0	7.42108e-06	115.76	1.43813e-09	2	1134.53
TDQVIQSLIALVNDPQPEHPLR	UniProtKB:P68036				3808706284	0	9.23469e-06	115.76	5.84013e-10	3	828.447
ELQENQDEIENMMNSIFK	UniProtKB:Q8WVM7				56079931	0	4.86136e-05	115.75	1.43067e-09	2	1106.5
NLNPEDIDQLITISGMVIR	UniProtKB:P33991				510027150	0	4.86136e-05	115.72	7.4079e-10	2	1071.07
EAAPDAGAEPITADSDPAYSSK	UniProtKB:Q8N163				3945350612	0	8.32432e-07	115.72	1.41152e-09	2	1081.99
SEIIPMFSNLASDEQDSVR	UniProtKB:P30153				6933677152	0	2.18321e-05	115.66	1.33907e-09	2	1069.51
LVSASTDNIVSQWDVLSGDcDQR	UniProtKB:Q15291	C20(Carbamidomethyl)			220105279	0	4.11589e-07	115.65	1.57672e-09	2	1283.1
ILLVDSPGMGNADDEQQEEGTSSK	UniProtKB:Q9UKN8				2.71669e+08	0	5.42875e-06	115.61	1.61453e-09	2	1260.57
VTGEADVEFATHEDAVAAMAK	UniProtKB:P55795				4363047730	0	3.57947e-07	115.6	1.3829e-09	2	1081.51
LMSDPDSSIIDFYPEDFAIDLNGK	UniProtKB:Q9H0D6				1.80675e+08	0	2.81563e-06	115.6	1.50519e-09	2	1351.64
DVPPSINTTNIDTLLVATDQTER	UniProtKB:A5YKK6				178901939	0	1.18112e-06	115.57	9.09094e-10	2	1257.15
IPVIENLGATLDQFDAIDFSDNEIRK	UniProtKB:P09661				397684626	0	6.00966e-07	115.56	1.01251e-09	3	978.504
KADcTITMADSDFLALMTGK	UniProtKB:P22307	C4(Carbamidomethyl)			507160438	0	3.76821e-08	115.55	1.43708e-09	2	1095.02
LSIQDNNVDLILATPPFSR	UniProtKB:O14497;UniProtKB:Q8NFD5				524832060	0	4.86136e-05	115.52	6.25612e-10	2	1057.07
MAEDEAETIGNLIEEcGGLEK	UniProtKB:O00629	C16(Carbamidomethyl)			276357991	0	4.34065e-06	115.49	1.59676e-09	2	1154.52
EAGSALLALQQTALQEDQENINPEK	UniProtKB:P20248				1064309814	0	2.67244e-06	115.47	1.13999e-09	2	1355.69
GSSEQAESDNMDVPPEDDSK	UniProtKB:Q12906				4663258654	0	4.86136e-05	115.39	1.15642e-09	2	1068.93
EYFGGFGEVESIELPMDNK	UniProtKB:Q14103				9317423616	0	3.80561e-05	115.37	1.51488e-09	2	1080.99
SPDSEEGNDMVFcDK	UniProtKB:Q92613	C13(Carbamidomethyl)			6.4185e+07	0	4.86136e-05	115.36	7.93898e-10	2	865.337
ISIPVDISDSDmMLNIINSSITTK	UniProtKB:P49368	M12(Oxidation)			604937178	0	1.36079e-06	115.34	1.13282e-09	2	1312.17
AVELGDELQIDAIDDQK	UniProtKB:Q96JM3				260991252	0	4.86136e-05	115.29	1.14401e-09	2	936.473
GQTEHDEGMLEYLEDIIGcGR	UniProtKB:Q9NTJ3	C19(Carbamidomethyl)			874405602	0	2.5868e-07	115.27	1.72267e-09	2	1211.53
SEDGTPAEDGTPAATGGSQPPSMGR	UniProtKB:Q9BQG0				705524096	0	2.69638e-07	115.24	1.65577e-09	2	1187.02
SEQDQAENEGEDSAVLmER	UniProtKB:Q99613	M17(Oxidation)			5.78627e+08	0	5.38046e-06	115.22	1.35484e-09	2	1076.95
TDSDEEVAMLLDTVQK	UniProtKB:Q86XI2				263056352	0	3.55635e-05	115.19	1.3998e-09	2	897.428
NSNVDSSYLESLYQScPR	UniProtKB:Q7Z2W4	C16(Carbamidomethyl)			380940224	0	4.86136e-05	115.16	1.56387e-09	2	1059.98
GPcVSENEIGTGGTcQWK	UniProtKB:Q15436	C3(Carbamidomethyl); C15(Carbamidomethyl)			640954088	0	4.00836e-05	115.15	1.42802e-09	2	990.434
DALNLAQMQEQTLQLEQQSK	UniProtKB:Q9NVI7;UniProtKB:Q5T2N8				719396067	0	3.44165e-05	115.12	1.29811e-09	2	1158.58
EGcEAIVDTGTSLmVGPVDEVR	UniProtKB:P07339	C3(Carbamidomethyl); M14(Oxidation)			147891097	0	4.86136e-05	115.03	1.74911e-09	2	1175.55
AGFAALQLEYFFTAGPDEVR	UniProtKB:Q9NTK5				1399128615	0	4.86136e-05	115.02	1.37982e-09	3	734.703
LVVDLTDIDPDVAYSSVPYEK	UniProtKB:P09960				3417849424	0	5.54949e-06	114.99	1.20681e-09	2	1169.59
ADcTITMADSDFLALMTGK	UniProtKB:P22307	C3(Carbamidomethyl)			1.46986e+08	0	4.86136e-05	114.98	1.59829e-09	2	1030.97
ALVDHENVIScPHLGASTK	UniProtKB:O43175	C11(Carbamidomethyl)			49289430461	0	7.44892e-06	114.95	1.24949e-09	2	1024.52
HSSVYPTQEELEAVQNMVSHTER	UniProtKB:Q12906				4705367136	0	8.64171e-09	114.92	1.87579e-09	3	891.086
ScVLFNcAALASQIAAEQNLDNDEGLK	UniProtKB:Q8WUM4	C2(Carbamidomethyl); C7(Carbamidomethyl)			472055443	0	4.67012e-05	114.9	1.89254e-09	3	984.47
RLEASDGGLDSAELAAELGMEHQAVVGAVK	UniProtKB:Q9Y285				980216276	0	1.54323e-10	114.9	1.39598e-09	3	1008.51
IENLTEEAFNTQVTALIK	UniProtKB:O43847				797065178	0	4.86136e-05	114.86	8.10101e-10	2	1017.54
NVDMLSELVQEYDEPILK	UniProtKB:Q99733				9374082352	0	4.64242e-05	114.85	1.37843e-09	2	1068.03
ILNNGHAFNVEFDDSQDK	UniProtKB:P00918				2.76279e+09	0	2.52931e-06	114.84	1.67214e-09	2	1031.98
EYFGAFGEIENIELPMDTK	UniProtKB:O14979				16377635877	0	1.50005e-06	114.82	1.7143e-09	2	1102.02
GLIAAIcAGPTALLAHEIGFGSK	UniProtKB:Q99497	C7(Carbamidomethyl)			80276908496	0	3.89342e-05	114.82	6.31532e-10	2	1134.12
LASTNSSVLGADLPSSmK	UniProtKB:Q13428	M17(Oxidation)			282728102	0	4.86136e-05	114.79	1.33571e-09	2	897.45
DSIANATVLLDYHLNYLK	UniProtKB:Q06787				595725730	0	4.86136e-05	114.79	9.13374e-10	2	1032.05
SSSNSGSTGFISFSGVESALSSLK	UniProtKB:Q96MF7				49608532	0	8.31119e-07	114.79	1.53269e-09	2	1168.58
mIQDGKGDVTITNDGATILK	UniProtKB:P50991	M1(Oxidation)			4702253234	0	5.90127e-06	114.75	1.14156e-09	2	1053.55
FEEESKEPVADEEEEDSDDDVEPITEFR	UniProtKB:P54105				1093929776	0	2.22763e-05	114.75	2.16672e-09	3	1105.47
LVSPGSANETSSILVESVTR	UniProtKB:O75369				2586625128	0	2.55444e-05	114.74	8.51766e-10	2	1023.55
GIGLFPSNFVTTNLNIETEAAAVDK	UniProtKB:O75886				74964254	0	1.41507e-06	114.74	1.06882e-09	2	1311.18
FVDTDIWNQYLEYQQSLLNESDGK	UniProtKB:Q9H993				4.48205e+08	0	5.74698e-07	114.74	1.96104e-09	2	1453.19
MLVDDIGDVTITNDGATILK	UniProtKB:P17987				10933482382	0	3.03125e-06	114.71	1.05662e-09	2	1052.55
AVEGcVSASQAATEDGQLLR	UniProtKB:Q9Y490	C5(Carbamidomethyl)			1274189758	0	1.68487e-05	114.7	1.57749e-09	2	1031.5
EDAQVAAEILEIADTPSGDK	UniProtKB:P08133				410330776	0	4.28414e-05	114.7	1.53124e-09	2	1036.51
YDPSLTFSENVDLTEPIISR	UniProtKB:P49736				2954028675	0	2.26888e-05	114.66	1.48248e-09	2	1148.57
AcGDSTLTQITAGLDPVGR	UniProtKB:P62879	C2(Carbamidomethyl)			3292018920	0	9.7544e-06	114.63	1.44403e-09	2	966.48
NcGcLGASPNLEQLQEENLK	UniProtKB:P54136	C2(Carbamidomethyl); C4(Carbamidomethyl)			1296125920	0	2.02045e-05	114.61	1.90215e-09	2	1137.53
EAEESLQQQQQEQEEALK	UniProtKB:Q4V328				289128072	0	4.86136e-05	114.6	1.76836e-09	2	1073
AMLSGPGQFAENETNEVNFR	UniProtKB:Q15369				5336964256	0	9.04087e-06	114.58	1.82233e-09	2	1106.01
mAETVDTSEMVNGATEQR	UniProtKB:Q01082	M1(Oxidation)			7.66347e+07	0	1.85505e-05	114.57	1.66505e-09	2	992.935
YSASSGGLcEEATAAK	UniProtKB:Q9UHV7	C9(Carbamidomethyl)			58645165	0	4.86136e-05	114.56	1.33924e-09	2	801.36
AEENTDQASPQEDYAGFER	UniProtKB:Q9NU22				273238638	0	3.64978e-05	114.56	1.62829e-09	2	1078.95
LALSQNQQSSGAAGPTGKNEEK	UniProtKB:O95232				6814220480	0	1.15678e-05	114.52	1.58721e-09	2	1108.05
LSAASTWLEDEGVGATTVMLK	UniProtKB:Q9Y4L1				2029614752	0	2.25624e-05	114.47	1.33781e-09	2	1090.06
VLTAEELNAAQTSVAYGcIK	UniProtKB:P54136	C18(Carbamidomethyl)			879888028	0	4.40672e-06	114.43	1.35722e-09	2	1069.54
LAEDILNTMFDTSYSK	UniProtKB:Q13045				6.10362e+08	0	4.86136e-05	114.42	1.64225e-09	2	924.446
LVPNMTPEVVGEQVTSYLTK	UniProtKB:Q96KP4				1194083528	0	4.86136e-05	114.41	9.88923e-10	2	1103.08
EANLQALIATGGDINAAIER	UniProtKB:Q9UMX0;UniProtKB:Q9UHD9;UniProtKB:Q9NRR5				740011584	0	4.86136e-05	114.39	9.31077e-10	2	1020.55
TQTVcNFTDGALVQHQEWDGK	UniProtKB:Q01469;UniProtKB:A8MUU1	C5(Carbamidomethyl)			5344546456	0	6.55629e-07	114.39	2.06904e-09	2	1217.56
SSVTSAAAVSALAGVQDQLIEK	UniProtKB:Q9HAF1				556705330	0	3.05138e-06	114.33	8.49755e-10	2	1073.08
QTQIFTTYSDNQPGVLIQVYEGER	UniProtKB:P34931;UniProtKB:P08107				8257471194	0	2.87847e-06	114.32	1.71452e-09	2	1393.69
NDPQSITADDLHQLLVVAR	UniProtKB:Q9BTE3				1127700288	0	1.63507e-06	114.31	1.11019e-09	2	1053.05
TIGTGLVTNTLAMTEEEK	UniProtKB:P49411				7.48473e+09	0	4.86136e-05	114.24	1.34577e-09	2	954.489
mLPTIIADNAGYDSADLVAQLR	UniProtKB:P78371	M1(Oxidation)			15256721216	0	1.06511e-06	114.21	1.47079e-09	2	1182.1
LAHHLVALYYQSEEQAEEELLDMAVLK	UniProtKB:P33991				110599222	0	3.18981e-07	114.16	1.37866e-09	3	1048.2
NAEFLTcNIPTSNASNNMVTTEK	UniProtKB:P55265	C7(Carbamidomethyl)			0	0	2.49574e-06	114.15	2.25448e-09	2	1278.59
GDLETSNLQDMQSQEISGLK	UniProtKB:P49454				320856958	0	4.86136e-05	114.13	1.87813e-09	2	1097.03
VAPAEPQEAPDSTAAGGSASK	UniProtKB:Q3LXA3				1066338222	0	1.5799e-05	114.1	1.83746e-09	2	970.966
LTTPTYGDLNHLVSATMSGVTTcLR	UniProtKB:Q13885;UniProtKB:Q9BVA1;UniProtKB:P68371;UniProtKB:P04350;UniProtKB:P07437	C23(Carbamidomethyl)			129841391288	0	7.24557e-08	114.1	1.71822e-09	2	1354.68
TLAQAMLNNAQPDQYEAPDK	UniProtKB:Q92973				1736107496	0	2.99062e-05	114.01	2.08526e-09	2	1109.53
VcNNPGLYSNPDLSAAASLALGK	UniProtKB:Q15021	C2(Carbamidomethyl)			441351152	0	1.80009e-06	114.01	1.63663e-09	2	1166.59
IPTPLNTSGVQVIcMK	UniProtKB:Q96CW1	C14(Carbamidomethyl)			1790651196	0	4.86136e-05	114	1.00084e-09	2	879.474
SDYMLEIADQVDQEIALK	UniProtKB:Q05397				122732529	0	4.86136e-05	113.99	1.76788e-09	2	1041.01
LVAGEmGQNEPDQGGQR	UniProtKB:Q99714	M6(Oxidation)			237032394	0	4.86136e-05	113.89	1.85132e-09	2	901.415
ITVVGVGAVGMAcAISILMK	UniProtKB:P00338	C13(Carbamidomethyl)			243053308	0	4.86136e-05	113.83	6.15825e-10	3	664.039
INNAAFEAVVVTNTIPQEDK	UniProtKB:P11908				8.71262e+08	0	3.21102e-05	113.83	1.20163e-09	2	1087.07
TSLITEEEDSTSEVLDEELK	UniProtKB:Q9Y6X4				7.72765e+07	0	1.62044e-05	113.81	2.18977e-09	2	1134.03
SMIDDTYQcLTAVAGTPR	UniProtKB:Q9UBB6	C9(Carbamidomethyl)			639655988	0	4.86136e-05	113.73	2.05509e-09	2	999.967
NPYLQDFLSAEGVLSSDGVWR	UniProtKB:Q9BUK6				694501608	0	1.93234e-06	113.73	1.99621e-09	2	1177.08
FFQELFDSELASQATAEFEK	UniProtKB:P40855				485393362	0	5.43159e-06	113.72	2.29146e-09	2	1169.05
DTSGAAALEMMSQAMIR	UniProtKB:Q8N7H5				284400108	0	3.4998e-05	113.69	1.91377e-09	2	891.912
WVGGPEIELIAIATGGR	UniProtKB:P48643				14384511000	0	4.86136e-05	113.59	8.1051e-10	2	869.982
HVGPGVLSmANAGPNTNGSQFFIcTIK	UniProtKB:P30405	M9(Oxidation); C24(Carbamidomethyl)			229711560	0	2.1273e-06	113.58	2.35162e-09	3	945.127
RTMmAcGGSIQTSVNALSADVLGR	UniProtKB:Q99832	M4(Oxidation); C6(Carbamidomethyl)			2.5708e+08	0	4.86136e-05	113.54	2.21582e-09	3	837.742
LAENAcTLADLTEGQVGK	UniProtKB:P05423	C6(Carbamidomethyl)			509969959	0	3.7048e-05	113.53	1.79795e-09	2	945.471
HMAAASAEcQNYAK	UniProtKB:Q9P2E9	C9(Carbamidomethyl)			464633448	0	4.86136e-05	113.49	1.65072e-09	2	776.337
VLSDVDAFIAYVGTDQK	UniProtKB:Q9HAV4				3267772264	0	1.45615e-05	113.49	1.56185e-09	2	920.974
GFVENSYLAGLTPTEFFFHAMGGR	UniProtKB:P24928				9.87597e+08	0	5.25789e-07	113.49	2.57749e-09	3	883.422
VLNTGSDVEEAVADALK	UniProtKB:O75122				1082305802	0	4.86136e-05	113.48	1.57353e-09	2	865.947
GTVGFSGAELENLVNQAALK	UniProtKB:Q96TA2				348656136	0	3.67294e-05	113.48	1.24504e-09	2	1009.53
DAGEGLLAVQITDQEGKPK	UniProtKB:O75369				1101393620	0	4.86136e-05	113.46	1.31323e-09	2	985.019
IGSSLYALGTQDSTDIcK	UniProtKB:Q9UNH7	C17(Carbamidomethyl)			485202896	0	4.86136e-05	113.44	1.99366e-09	2	964.969
ISGADINSIcQESGMLAVR	UniProtKB:P43686	C10(Carbamidomethyl)			3406351288	0	5.49752e-06	113.44	2.06182e-09	2	1011
NDSLAGVVIADNEYPSR	UniProtKB:O15498				484296350	0	4.86136e-05	113.42	1.91231e-09	2	910.451
HPVSLEQYLMEGSYNK	UniProtKB:P48556				1373078067	0	1.43583e-05	113.41	2.0736e-09	2	947.957
LSLQNccLTGAGcGVLSSTLR	UniProtKB:P13489	C6(Carbamidomethyl); C7(Carbamidomethyl); C13(Carbamidomethyl)			2369546984	0	1.38625e-05	113.39	2.18419e-09	2	1134.05
FTALSSESIENLPSVFGSNPK	UniProtKB:Q92538				296915632	0	8.73874e-06	113.35	2.02592e-09	2	1112.55
QLFVLAGSAEEGVMTPELAGVIK	UniProtKB:P08754				374729144	0	3.47147e-07	113.34	9.95947e-10	2	1180.14
ALSQAAVEEEEEEEEEEEPAQGK	UniProtKB:Q5JTH9				188249096	0	2.83807e-06	113.33	2.8203e-09	2	1280.57
NKEDQYDHLDAADMTK	UniProtKB:P34932				5576923928	0	1.61309e-05	113.29	2.20553e-09	2	947.42
NEDVcScSTDTSEVPR	UniProtKB:P49790	C5(Carbamidomethyl); C7(Carbamidomethyl)			2.55517e+08	0	4.86136e-05	113.26	1.61446e-09	2	928.377
LAELEEFINGPNNAHIQQVGDR	UniProtKB:Q00610				1817266592	0	4.75828e-05	113.24	2.15875e-09	2	1232.62
QSTSFLVLQEILESEEK	UniProtKB:O00151				2292351756	0	4.86136e-05	113.22	1.64583e-09	2	990.51
TDASSASSFLDSDELER	UniProtKB:Q14498				3726546508	0	4.86136e-05	113.21	2.17729e-09	2	915.405
IEHTYTGGVDSDLGEAMSDcDPDGPLMcHTTK	UniProtKB:Q15029	C20(Carbamidomethyl); C28(Carbamidomethyl)			294818284	0	1.97117e-09	113.21	3.16888e-09	3	1170.49
TFHETLDccGSSTLTALTTSVLK	UniProtKB:P60033	C8(Carbamidomethyl); C9(Carbamidomethyl)			1914334288	0	2.66291e-05	113.19	2.54547e-09	2	1271.61
IGLSVSEVIEGYEIAcR	UniProtKB:P50990	C16(Carbamidomethyl)			767014133	0	4.86136e-05	113.09	1.77782e-09	2	947.983
VIPATDLSEQISTAGTEASGTGNmK	UniProtKB:P06737	M24(Oxidation)			117334080	0	9.02683e-06	113.09	2.42165e-09	2	1247.61
IIDQSSNVEIASFPIYK	UniProtKB:Q5R372				231836028	0	4.86136e-05	113.07	1.32812e-09	2	962.511
DTmSDQALEALSASLGTR	UniProtKB:P20810	M3(Oxidation)			209701622	0	2.77866e-05	113.06	2.31164e-09	2	941.445
TELQGLIGQLDEVSLEK	UniProtKB:Q9UL15				821234008	0	4.1525e-05	113.03	1.05918e-09	2	936.511
TQTAIASEDMPNTLTEAEK	UniProtKB:Q01082				908560034	0	1.13479e-05	113.03	2.37595e-09	2	1025.49
mTGESEcLNPSTQSR	UniProtKB:Q9H2G2	M1(Oxidation); C7(Carbamidomethyl)			362575730	0	4.86136e-05	113.01	1.87588e-09	2	856.865
ELMLHAADVEALQAAK	UniProtKB:P12270				1.39842e+09	0	3.35971e-05	112.96	1.47928e-09	2	855.451
TDVLcADEEEDcQAASLLQK	UniProtKB:Q6W2J9	C5(Carbamidomethyl); C12(Carbamidomethyl)			134050718	0	4.86136e-05	112.94	2.77557e-09	2	1148.01
SIQTIcSGLLTDVEDQAAK	UniProtKB:Q6PCB5	C6(Carbamidomethyl)			447995994	0	2.57505e-05	112.92	2.06652e-09	2	1025.01
IVFDSIDNLEAAPHDIGYVK	UniProtKB:Q9UJ70				203352505	0	2.6042e-05	112.92	1.88325e-09	2	1108.57
GTVLALTENNFDDTIAEGITFIK	UniProtKB:Q8NBS9				1.02069e+09	0	2.70838e-06	112.89	1.65985e-09	2	1241.64
VFTTQELVQAFTHAPATLEADR	UniProtKB:O95433				1486206319	0	1.21999e-06	112.88	1.87466e-09	2	1223.12
cQLALQNVcDDVDNDDVSLK	UniProtKB:Q9C0B1	C1(Carbamidomethyl); C9(Carbamidomethyl)			22449935	0	9.7852e-06	112.87	2.83487e-09	2	1161.01
DATNVGDEGGFAPNILENK	UniProtKB:P06733				83995451494	0	4.86136e-05	112.86	2.49021e-09	2	980.968
LAPILcDGTATFVDLVPGFR	UniProtKB:O43264	C6(Carbamidomethyl)			1312334039	0	4.86136e-05	112.85	1.53124e-09	2	1081.57
NEAIQAAHDAVAQEGQcR	UniProtKB:P09936	C17(Carbamidomethyl)			23292241024	0	5.04991e-06	112.84	2.52094e-09	2	984.455
LSESGAIMTDLEENPK	UniProtKB:Q9H2J4				1677594180	0	4.86136e-05	112.77	2.26492e-09	2	867.421
ASAGHAVSIAQDDAGADDWETDPDFVNDVSEK	UniProtKB:Q14247				2917231562	0	5.93268e-07	112.76	3.57841e-09	3	1111.49
NAPAIIFIDELDAIAPK	UniProtKB:P55072				778326117	0	4.86136e-05	112.74	8.19979e-10	2	906.006
PEIVDTcSLASPASVcR	UniProtKB:P09960	C7(Carbamidomethyl); C16(Carbamidomethyl)			1139479024	0	4.29878e-05	112.69	2.48089e-09	2	931.441
VTEGLTDVILYHQPDDK	UniProtKB:O60506				1144554666	0	4.46211e-05	112.69	2.01447e-09	2	971.995
HLLSLMGIPYLDAPSEAEAScAALVK	UniProtKB:P39748	C21(Carbamidomethyl)			4760512880	0	3.99662e-07	112.69	1.8826e-09	2	1378.71
GQVSQETLSEEASSQATLPNQPVEK	UniProtKB:Q9NVI1				273380743	0	1.4147e-07	112.68	2.65062e-09	2	1329.15
SVELDNDDGGGSAAQK	UniProtKB:O60282				2.23984e+08	0	4.86136e-05	112.66	2.16014e-09	2	781.855
VYVGNLGNNGNKTELER	UniProtKB:P84103				6018565696	0	4.86136e-05	112.66	1.94876e-09	2	938.981
TLEALEEGGGELNDFVSTAK	UniProtKB:A3KN83				1.11942e+08	0	2.80293e-05	112.63	2.34212e-09	2	1040.52
LTELYNAYVETQDQLLLEK	UniProtKB:P12270				1177450944	0	4.86136e-05	112.59	1.60588e-09	2	1142.1
IcPVETLVEEAIQcAEK	UniProtKB:P30084	C2(Carbamidomethyl); C14(Carbamidomethyl)			1010880440	0	4.86136e-05	112.58	2.49622e-09	2	994.986
VLGETANILETGETLEPAGAHLVLEEK	UniProtKB:Q02952				2122250252	0	1.20714e-07	112.57	1.53776e-09	2	1417.24
APAALPALcDLLASAADPQIR	UniProtKB:Q8TEX9	C9(Carbamidomethyl)			4630070759	0	1.67266e-05	112.49	1.3826e-09	2	1067.57
ILATGANVILTTGGIDDmcLK	UniProtKB:P17987	M18(Oxidation); C19(Carbamidomethyl)			923898092	0	1.51663e-05	112.49	1.68133e-09	2	1096.58
MEDTSFPSGGNAIGVNSASSK	UniProtKB:Q8N8S7				427721564	0	4.86136e-05	112.47	2.88414e-09	2	1028.47
SILSSASATVATVGQGISNVIEK	UniProtKB:Q9NRY5				273846028	0	4.86136e-05	112.47	9.07965e-10	2	1116.62
KAEDIENDALSPEEQEEcK	UniProtKB:P49792	C18(Carbamidomethyl)			311938050	0	2.03204e-06	112.43	3.0417e-09	2	1117.49
HAASDVDLEIESLLNQQSTK	UniProtKB:Q86U44				0	0	1.4523e-07	112.41	2.46583e-09	2	1099.55
HSLNSSSASTTEPDFQK	UniProtKB:P42704				1732904534	0	2.00376e-06	112.38	2.82082e-09	2	918.425
SLYQSAGVAPESFEYIEAHGTGTK	UniProtKB:P49327				13265235192	0	5.61676e-06	112.36	3.11115e-09	2	1271.61
LEESLLETLATSQGNILENK	UniProtKB:Q8NCM8				284620716	0	1.44964e-05	112.35	1.5807e-09	2	1101.59
NPETSVTQSSSAQDEPATK	UniProtKB:Q9HCG8				446669276	0	3.6678e-05	112.31	2.94597e-09	2	988.952
LTIFDEEVDPDEGLFGPGR	UniProtKB:Q53T59				672356472	0	3.76411e-05	112.31	2.88604e-09	2	1053.5
TFSHELSDFGLESTAGEIPVVAIR	UniProtKB:P30101				9515001138	0	5.65601e-09	112.17	2.25706e-09	2	1288.16
FMIQGGDFSNQNGTGGESIYGEK	UniProtKB:Q08752				93442940	0	2.08865e-05	112.16	3.66188e-09	2	1218.55
SLVGLQEELLFQYPDTR	UniProtKB:Q9NY61				227371072	0	4.86136e-05	112.13	2.142e-09	2	1004.52
SAGVQcFGPTAEAAQLESSK	UniProtKB:P22102	C6(Carbamidomethyl)			3985728896	0	4.62449e-05	112.12	2.92887e-09	2	1019.49
cDIEEATNQLLDVNLHENQK	UniProtKB:Q9BV44	N-Term(Acetyl); C1(Carbamidomethyl)			564927060	0	3.10397e-06	112.09	3.40589e-09	2	1213.07
LLYDLADQLHAAVGASR	UniProtKB:P13804				2525118258	0	4.86136e-05	112.07	1.67076e-09	2	906.986
DGAVNGPSVVGDQTPIEPQTSIER	UniProtKB:P49321				1660983649	0	3.15719e-05	111.98	2.81723e-09	2	1233.61
DQLSVLENGVDIVVGTPGR	UniProtKB:Q92499				53432144	0	4.86136e-05	111.95	1.49162e-09	2	984.53
ETVYcLNDDDETEVLKEDIIQGFR	UniProtKB:P13010	C5(Carbamidomethyl)			16629475756	0	3.07859e-08	111.82	3.97192e-09	2	1451.18
MQEAMTQEVSDVFSDTTTPIK	UniProtKB:P18206				3.01271e+08	0	2.86078e-06	111.81	3.67028e-09	2	1179.55
DTPTQEDWLVSVLPEGSR	UniProtKB:Q9NQW7				1472493458	0	4.86136e-05	111.79	2.89687e-09	2	1015
ELEQVcNPIISGLYQGAGGPGPGGFGAQGPK	UniProtKB:P08107	C6(Carbamidomethyl)			25016073008	0	2.09952e-05	111.79	3.19851e-09	3	1019.17
KIEDLGAAMEEALILDNK	UniProtKB:Q13813				1099838224	0	2.24853e-06	111.78	1.90196e-09	2	987.021
TEAGAVGEAGGAEDPGAAAGGSVR	UniProtKB:Q8ND04				1.98391e+08	0	4.30172e-07	111.77	3.35298e-09	2	1028.98
IcDPGLTSFEPEALGNLVEGMDFHK	UniProtKB:Q13555	C2(Carbamidomethyl)			714026064	0	3.83413e-06	111.75	3.93287e-09	3	926.103
LHDINAQLVEDQGFLDTLK	UniProtKB:Q10567				2674642210	0	2.10966e-06	111.68	2.15545e-09	2	1085.07
VAMQDATAQMAMLQFISSGLSK	UniProtKB:Q99798				525575823	0	4.86136e-05	111.63	3.02448e-09	2	1164.58
HLLAFLLAELGTSGSIDGNNQLVIK	UniProtKB:A6NK07;UniProtKB:P20042				323481111	0	2.84306e-06	111.63	8.21047e-10	3	875.156
AYQELLATVNEMDISPDEAVR	UniProtKB:Q9UNS1				86932494	0	4.86136e-05	111.62	3.32103e-09	2	1182.58
AFSAVDTDGNGTINAQELGAALK	UniProtKB:Q9NZT1				108104240	0	2.45088e-06	111.61	2.84758e-09	2	1132.07
LQLEYcSLSAAScEPLASVLR	UniProtKB:P13489	C6(Carbamidomethyl); C13(Carbamidomethyl)			2583859243	0	4.86136e-05	111.61	3.00461e-09	2	1184.09
AVQGGGATPVVGAVQGPVPGMPPMTQAPR	UniProtKB:P09012				2048373832	0	6.86207e-07	111.61	2.03241e-09	2	1364.21
LEGSDVQLLEYEASAAGLIR	UniProtKB:Q9NY33				1266131596	0	4.86136e-05	111.58	2.02287e-09	2	1067.56
ARPFPDGLAEDIDKGEVSAR	UniProtKB:P13639				21596628692	0	7.59614e-06	111.58	2.72797e-09	3	715.033
GcIVDANLSVLNLVIVK	UniProtKB:P62753	C2(Carbamidomethyl)			1.94814e+09	0	4.86136e-05	111.57	6.83739e-10	2	914.025
LVAGEMGQNEPDQGGQR	UniProtKB:Q99714				6182634796	0	4.86136e-05	111.52	3.17077e-09	2	893.411
mTLSNPSELDELMSEEAYEK	UniProtKB:P23434	M1(Oxidation)			1028241053	0	2.90819e-06	111.5	3.93051e-09	2	1166.51
MSFGEIEEDAYQEDLGFSLGHLGK	UniProtKB:Q8WWY3				392446192	0	3.38888e-05	111.5	4.29086e-09	3	891.407
ELGQTLIDGGILDDIISEK	UniProtKB:P46939				661113186	0	4.28388e-05	111.48	1.76025e-09	2	1015.04
SLGYAYVNFQQPADAER	UniProtKB:Q13310;UniProtKB:P11940				8541167132	0	4.86136e-05	111.47	3.30229e-09	2	964.96
QQLEEQTVELSTEVQSLYR	UniProtKB:Q92878				1.23764e+08	0	4.86136e-05	111.47	3.10733e-09	2	1140.57
NIELIcQENEGENDPVLQR	UniProtKB:Q15691	C6(Carbamidomethyl)			6193036740	0	3.94303e-05	111.45	3.75152e-09	2	1135.54
KITAFVPNDGcLNFIEENDEVLVAGFGR	UniProtKB:P62266	C11(Carbamidomethyl)			1.72785e+09	0	2.71693e-05	111.45	3.3648e-09	3	1042.18
LEGFALMADMVYVTQSAGR	UniProtKB:O75643				242730088	0	2.09362e-05	111.43	3.18536e-09	2	1030.01
ALANVNIGSLIcNVGAGGPAPAAGAAPAGGPAPSTAAAPAEEK	UniProtKB:P05386	C12(Carbamidomethyl)			12710619252	0	1.41809e-07	111.42	2.52099e-09	3	1270.32
IGAAIQEELGYNcQTGGVIAEILR	UniProtKB:O00567	C13(Carbamidomethyl)			501528714	0	1.39113e-06	111.38	2.37001e-09	2	1288.17
AKPSPAPPSTTTAPDASGPQK	UniProtKB:P40855				6827645520	0	2.23441e-06	111.36	2.57178e-09	2	1003.52
ILHTLLASGEDALDFTQESEPSYISDVGPPGR	UniProtKB:Q8N1F7				2739351072	0	6.2655e-07	111.3	3.70581e-09	3	1138.9
GEPVSAEDLGVSGALTVLMK	UniProtKB:P11586				2.02302e+08	0	1.47662e-05	111.29	1.91476e-09	2	987.026
LLGPSAAADILQLSSSLPLQSR	UniProtKB:Q7Z6Z7				1871607360	0	2.47391e-05	111.26	8.02038e-10	2	1119.13
SVNESLNNLFITEEDYQALR	UniProtKB:Q00610				8200736374	0	8.70814e-06	111.25	3.59762e-09	2	1178.08
DLQcPVLQSSELEGTPEVScR	UniProtKB:O75818	C4(Carbamidomethyl); C20(Carbamidomethyl)			4.55888e+08	0	1.43712e-05	111.25	4.24665e-09	2	1202.56
ELLVDcYKPTEAFISGLLDK	UniProtKB:Q96C90	C6(Carbamidomethyl)			6391958787	0	2.62493e-07	111.18	2.50305e-09	2	1156.1
APQETYADIGGLDNQIQEIK	UniProtKB:P62191				2223560012	0	6.06313e-06	111.16	3.0532e-09	2	1102.06
mGQAVPAPTGAPPGGQPDYSAAWAEYYR	UniProtKB:Q96AE4	M1(Oxidation)			761775158	0	2.23714e-05	111.15	4.88694e-09	2	1462.68
LDGSLDEYLSLQEQLTDVEK	UniProtKB:Q96Q15				9.9381e+07	0	2.47763e-05	111.14	3.2115e-09	2	1148.08
ALLEAFGTTGFQATNFGR	UniProtKB:P49366				430951332	0	4.86136e-05	111.12	2.93116e-09	2	950.984
KAEEIANEMIEAAK	UniProtKB:P49588				2306675920	0	4.86136e-05	111.07	2.75524e-09	2	773.894
TLDGGLNVIQLETAVGAAIK	UniProtKB:Q16851				914196800	0	1.34689e-05	111.06	9.52259e-10	2	992.06
NDDISELEDLSELEDLK	UniProtKB:Q9H4L7				122196710	0	4.86136e-05	111.03	3.88316e-09	2	988.966
NSVTGGTAAFEPSVDYcVVK	UniProtKB:P27708	C17(Carbamidomethyl)			1702826292	0	9.45731e-06	111	4.03678e-09	2	1051
VFQAENPFDFMENISLEGK	UniProtKB:Q7LG56				337906034	0	4.11146e-05	110.99	4.19218e-09	2	1108.02
VVQGDIGEANEDVTQIVEILHSGPSK	UniProtKB:Q86XP3				1456559192	0	5.53378e-07	110.99	2.79293e-09	3	912.137
EGTYDGSWALADVMSQLK	UniProtKB:Q96GQ7				651205353	0	4.86136e-05	110.98	3.8212e-09	2	985.967
VPAPVTMDSFFFGcELSGHTR	UniProtKB:O75607	C14(Carbamidomethyl)			1303411696	0	1.16594e-07	110.95	4.55198e-09	3	785.7
DAQDAEAAmDGAELDGR	UniProtKB:Q9BRL6	M9(Oxidation)			53258223	0	4.86136e-05	110.91	2.90284e-09	2	875.861
ALGTPNNEVWPEVESLQDYK	UniProtKB:P06493				3247401216	0	4.18995e-05	110.89	3.69509e-09	2	1145.06
SAYQTIDSAEAPADPFAVPEGR	UniProtKB:Q6RW13				1702657346	0	2.75556e-05	110.89	4.39451e-09	2	1146.54
LPSSVFASEFEEDVGLLNK	UniProtKB:Q96GA3				1263298000	0	4.4101e-06	110.86	3.24613e-09	2	1041.03
LVTSPccIVTSTYGWTANMER	UniProtKB:P07900	C6(Carbamidomethyl); C7(Carbamidomethyl)			10537527244	0	1.26464e-05	110.83	4.6985e-09	2	1223.56
EDLPAENGETKTEESPASDEAGEK	UniProtKB:P05114				7066011936	0	1.27214e-05	110.83	4.79928e-09	2	1267.06
aEEGIAAGGVMDVNTALQEVLK	UniProtKB:P25398	N-Term(Acetyl)			5.29768e+06	0	5.07131e-06	110.81	3.22812e-09	2	1129.07
LVSGGGAcSDTGAcTPAR	UniProtKB:Q9UJC3	C8(Carbamidomethyl); C14(Carbamidomethyl)			1544897971	0	4.86136e-05	110.8	3.66766e-09	2	868.891
SENGLEFTSSGSANTETTK	UniProtKB:P21796				3528180978	0	4.1692e-05	110.78	4.1893e-09	2	980.446
mVSDINNAWGcLEQVEK	UniProtKB:P12814	M1(Oxidation); C11(Carbamidomethyl)			1137687478	0	4.86136e-05	110.76	4.08943e-09	2	1004.96
LHDVNSDGFLDEQELEALFTK	UniProtKB:P80303				699333950	0	2.59998e-07	110.75	4.29069e-09	2	1210.59
TVTLQGNLDPcALYASEEEIGQLVK	UniProtKB:P06132	C11(Carbamidomethyl)			1314121272	0	3.63929e-07	110.72	3.40247e-09	2	1374.7
DDSGQYYcIASNDAGSAR	UniProtKB:Q9BX67	C8(Carbamidomethyl)			199160810	0	4.86136e-05	110.7	3.27858e-09	2	975.4
DQTVIQNTDGNNNEAWAK	UniProtKB:CON_Q0IIK2;UniProtKB:CON_Q29443				399008142	0	4.86136e-05	110.7	4.17951e-09	2	1009.47
NVIDGDLcEQFNSMEPNK	UniProtKB:Q15393	C8(Carbamidomethyl)			4694650104	0	5.36458e-06	110.69	4.17337e-09	2	1055.46
QASPETSASPDGSQNLVYETELLR	UniProtKB:Q14789				0	0	4.86136e-05	110.66	4.3436e-09	2	1296.63
SSLQYSSPAPDGcGDQTLGDLLLTPTR	UniProtKB:P22102	C13(Carbamidomethyl)			7.01329e+08	0	4.22061e-06	110.63	4.59341e-09	2	1425.19
SLLVIPNTLAVNAAQDSTDLVAK	UniProtKB:P17987				20356627356	0	9.37238e-06	110.62	1.09801e-09	2	1177.16
LYIGNLSENAAPSDLESIFK	UniProtKB:O00425				2486447904	0	4.83776e-06	110.6	3.18424e-09	2	1091.06
GHYTEGAELVDSVLDVVRK	UniProtKB:Q13885;UniProtKB:Q9BVA1;UniProtKB:P68371;UniProtKB:Q13509;UniProtKB:P07437				27540500920	0	4.79493e-06	110.59	2.78216e-09	2	1044.04
HYGPGWVSMANAGK	UniProtKB:P23284				5735787733	0	4.86136e-05	110.58	3.36344e-09	2	737.85
INEVLTAAVTQASLQSIIHK	UniProtKB:Q9BTA9				761308291	0	2.86705e-05	110.58	8.68859e-10	3	712.742
IGGDAGTSLNSNDYGYGGQK	UniProtKB:Q96AE4				5931085778	0	4.86136e-05	110.57	4.38325e-09	2	987.446
LVVGGLLSPEEDQSLLLSQFR	UniProtKB:Q9BVI4				1547097928	0	2.89787e-06	110.56	1.39545e-09	2	1150.63
SSNEVLNVIQGNTTVDELMMR	UniProtKB:Q9UNN5				324629887	0	2.13018e-05	110.56	4.28172e-09	2	1175.58
TGAFEPAEASVNPQDLQGSLQELK	UniProtKB:Q9NVX2				280465580	0	7.56098e-06	110.52	4.04809e-09	2	1265.13
VQSSTLVSSLEAELSEVK	UniProtKB:Q8N4C6				128718318	0	4.86136e-05	110.5	2.38811e-09	2	953.508
GHTDSVQDISFDHSGK	UniProtKB:P43034				2406767584	0	4.86136e-05	110.48	4.00452e-09	2	865.396
DLELEmGDDYILDLQK	UniProtKB:Q9BZE4	M6(Oxidation)			124257188	0	4.86136e-05	110.48	4.14017e-09	2	963.461
QTNPSAMEVEEDDPVPEIR	UniProtKB:P55072				4828785128	0	4.86136e-05	110.45	4.72333e-09	2	1078.5
DSLDPSFTHAMQLLTAEIEK	UniProtKB:Q07666				11167511166	0	1.80612e-06	110.45	4.19997e-09	2	1123.55
ALNALcDGLIDELNQALK	UniProtKB:P30084	C6(Carbamidomethyl)			10174667340	0	4.05686e-05	110.44	2.60748e-09	2	986.02
VEAALALQSLISNQIQAK	UniProtKB:O15397				1.00744e+09	0	2.22894e-05	110.41	1.04458e-09	2	949.041
ScGSSTPDEFPTDIPGTK	UniProtKB:P41091	C2(Carbamidomethyl)			4.77908e+09	0	4.86136e-05	110.39	4.13453e-09	2	948.421
LVPLLLEDGGEAPAALEAALEEK	UniProtKB:Q14204				8204435088	0	7.49448e-07	110.38	1.95063e-09	2	1174.63
NLDLAVLELMQSSVDNTK	UniProtKB:P78527				630198751	0	4.86136e-05	110.34	3.33955e-09	2	995.508
GYEVIYLTEPVDEYcIQALPEFDGK	UniProtKB:P14625	C15(Carbamidomethyl)			1291043600	0	2.80374e-06	110.31	5.41253e-09	2	1474.7
aDIDNKEQSELDQDLDDVEEVEEEETGEETK	UniProtKB:P55209	N-Term(Acetyl)			242179808	0	1.37306e-06	110.31	6.56198e-09	3	1208.19
TFAEVTDLDNEVNNMLK	UniProtKB:P11047				294443061	0	4.86136e-05	110.3	4.26684e-09	2	976.97
FLYEELGLDSTSVFEDLKK	UniProtKB:Q4J6C6				854940480	0	3.28217e-05	110.3	3.61683e-09	2	1117.07
YGGPPPDSVYSGQQPSVGTEIFVGK	UniProtKB:O60506				2294291320	0	5.31313e-08	110.26	4.69673e-09	2	1283.63
VIDVFAMPQSGTGVSVEAVDPVFQAK	UniProtKB:O00487				1873666584	0	2.25113e-05	110.24	3.44288e-09	2	1346.19
DLSAGAVSAVQcIANPIK	UniProtKB:Q7L266	C12(Carbamidomethyl)			831738662	0	4.86136e-05	110.21	2.45869e-09	2	907.486
AGEPDGESLDEQPSSSSSK	UniProtKB:Q9H3Q1				690207232	0	1.8889e-05	110.2	4.26595e-09	2	953.914
HLcQQLQAEQAAAEK	UniProtKB:Q14980	C3(Carbamidomethyl)			675303624	0	4.86136e-05	110.18	3.91052e-09	2	862.925
DKYPNLQVIGGNVVTAAQAK	UniProtKB:P12268				4438006504	0	1.4492e-06	110.18	1.78113e-09	2	1043.57
GMYGIENEVFLSLPcILNAR	UniProtKB:P07195	C15(Carbamidomethyl)			609214840	0	5.22291e-06	110.18	4.12159e-09	2	1148.57
EYSSELNAPSQESDSHPR	UniProtKB:P49756				3259942005	0	4.86136e-05	110.16	4.55216e-09	2	1016.95
SFVPNMIGGASQADLAVLVISAR	UniProtKB:P15170;UniProtKB:Q8IYD1				531100644	0	1.37544e-05	110.11	1.91488e-09	2	1158.63
QFLQAAEAIDDIPFGITSNSDVFSK	UniProtKB:P07237				1883138028	0	2.77289e-07	110.05	4.38819e-09	2	1357.18
sSIGTGYDLSASTFSPDGR	UniProtKB:P25788	N-Term(Acetyl)			2242984910	0	4.86136e-05	110.04	4.95168e-09	2	980.45
QLEESVDALSEELVQLR	UniProtKB:P33176				1.86943e+08	0	4.86136e-05	110.02	3.00065e-09	2	979.513
IGVSSDSGSINPMSEGFK	UniProtKB:P49790				552403876	0	3.42745e-05	110	4.49e-09	2	906.427
QQLSAEELDAQLDAYNAR	UniProtKB:Q86V81				3985616478	0	4.86136e-05	109.99	4.72637e-09	2	1017.99
YNLEELYQAVENLcSYK	UniProtKB:Q13620	C14(Carbamidomethyl)			2134436338	0	4.86136e-05	109.99	5.09772e-09	2	1068.5
GANLEEVNDEGYTPLMEAAR	UniProtKB:Q8IWZ3				3.2917e+08	0	4.86136e-05	109.98	5.28076e-09	2	1090
FAAEEFKVPAATSAIITNDGIGINPAQTAGNVFLK	UniProtKB:P61960				677383760	0	5.81734e-07	109.93	2.33127e-09	3	1192.63
FVVDLSDQVAPTDIEEGMR	UniProtKB:P35998				2793543888	0	3.40066e-05	109.9	4.88878e-09	2	1061.01
mEANGSQGTSGSANDSQHDPGK	UniProtKB:Q96DH6	N-Term(Acetyl)			184494814	0	4.86136e-05	109.9	4.62426e-09	2	1108.96
AEGDSAGTAGTPGGTPAGDK	UniProtKB:Q92925				5.24885e+08	0	3.00018e-05	109.88	4.32641e-09	2	858.885
AWELYGSPNALVLLIAQEK	UniProtKB:P48637				1255239746	0	4.86136e-05	109.88	1.76048e-09	2	1058.08
TINQEScIEPLAESITDVLVR	UniProtKB:Q07820	C7(Carbamidomethyl)			427206420	0	3.57708e-06	109.87	3.43067e-09	2	1194.12
DDVAQTDLLQIDPNFGSK	UniProtKB:P08195				9.68581e+08	0	4.86136e-05	109.86	4.50749e-09	2	988.488
AEYEFDSPYWDDISDSAK	UniProtKB:Q14012;UniProtKB:Q8IU85				222172164	0	4.86136e-05	109.84	4.63827e-09	2	1069.45
LQLNGNLQLELAQVLAQERPK	UniProtKB:P49327				2624591371	0	1.63409e-05	109.79	8.54852e-10	3	792.455
LTQTDELGALLAVLK	UniProtKB:Q6AI08				2.24717e+08	0	4.86136e-05	109.77	9.81107e-10	2	792.968
mATVWDEAEQDGIGEEVLK	UniProtKB:P17980	M1(Oxidation)			575560802	0	2.74701e-05	109.77	5.51075e-09	2	1068.49
NMITGTAPLDGcILVVAANDGPMPQTR	UniProtKB:P49411	C12(Carbamidomethyl)			1037465767	0	4.78668e-06	109.7	4.9756e-09	2	1406.7
IDNSQVESGSLEDDWDFLPPKK	UniProtKB:P27797				7633884488	0	1.89118e-05	109.68	5.82637e-09	3	840.404
AcGNMFGLMHGTcPETSGGLLIcLPR	UniProtKB:P49903	C2(Carbamidomethyl); C13(Carbamidomethyl); C23(Carbamidomethyl)			3108714280	0	3.98636e-07	109.64	6.851e-09	3	950.439
mLVDDIGDVTITNDGATILK	UniProtKB:P17987	M1(Oxidation)			12399874240	0	1.95974e-05	109.62	3.61212e-09	2	1060.55
AVGTPGGGGGGAVPGISAMSR	UniProtKB:P48634				621667406	0	4.86136e-05	109.6	4.0789e-09	2	878.447
EITLLMQTLNTLSTPEEK	UniProtKB:P40222				2176020634	0	4.86136e-05	109.6	2.87497e-09	2	1031.05
GAVEALAAALAHISGATSVDQR	UniProtKB:Q9NR30				4613519904	0	1.43074e-06	109.59	2.96347e-09	2	1054.56
IVMLVNENPLLTEEAALNK	UniProtKB:Q8IV38				413128740	0	4.86136e-05	109.59	2.2101e-09	2	1056.08
mPSESAAQSLAVALPLQTK	UniProtKB:O43660	M1(Oxidation)			625572092	0	5.53793e-06	109.57	3.18195e-09	2	979.516
mTNGFSGADLTEIcQR	UniProtKB:P55072	M1(Oxidation); C14(Carbamidomethyl)			0	0	4.86136e-05	109.56	5.03458e-09	2	908.405
KLETEETVPETDVETK	UniProtKB:Q03701				972625640	0	2.77497e-05	109.56	4.1017e-09	2	924.472
HEDLLAQATGIESLEGVLQMMQTR	UniProtKB:Q9UP83				403519402	0	3.14639e-06	109.55	4.92196e-09	3	890.78
LPDDDPTAVAGSFScTMK	UniProtKB:Q9UBF2	C15(Carbamidomethyl)			1.65482e+08	0	1.84389e-05	109.53	5.21323e-09	2	956.428
DQGSFTEVVSISNLGMAK	UniProtKB:P11717				349406752	0	1.35445e-05	109.51	4.65966e-09	2	941.966
VMEMADGIEVEDLPQFTTR	UniProtKB:Q96HQ2				470257648	0	4.85402e-05	109.51	5.86306e-09	2	1091.02
HIADLAGNSEVILPVPAFNVINGGSHAGNK	UniProtKB:P06733				3.85816e+10	0	3.51891e-08	109.5	2.49425e-09	3	1004.54
DYLDFLDDEEDQGIYQSK	UniProtKB:P25205				1141011760	0	5.26852e-06	109.49	5.59828e-09	2	1096.98
FDDLSGEYNPEVFDK	UniProtKB:Q96EU6				3.12236e+08	0	4.86136e-05	109.48	5.07182e-09	2	887.895
MmAIAPNVTVMVGELVGAR	UniProtKB:Q9Y2X3	M2(Oxidation)			2026418968	0	4.86136e-05	109.47	3.79668e-09	2	988.011
LQAEVLEcVSLVELTSLK	UniProtKB:P07741	C8(Carbamidomethyl)			358814396	0	4.39607e-05	109.47	1.80767e-09	2	1016.06
LVGQGASAVLLDLPNSGGEAQAK	UniProtKB:Q99714				3985369894	0	4.0817e-05	109.43	2.57639e-09	2	1098.09
KLDDAIEDcTNAVK	UniProtKB:Q99615	C9(Carbamidomethyl)			1254728272	0	4.86136e-05	109.42	4.58237e-09	2	796.387
LLDFGSLSNLQVTQPTVGMNFK	UniProtKB:P08708				24109170328	0	3.41549e-06	109.42	3.63378e-09	2	1205.13
NLDVGANIFIGNLDPEIDEK	UniProtKB:Q15427				2282279633	0	4.84748e-05	109.37	4.53658e-09	2	1093.56
NALNIGMVEEVLQSSDETK	UniProtKB:Q9NTX5				1456106062	0	4.17372e-05	109.33	5.26289e-09	2	1039.01
YPSPPMGSVSAPNLPTAEDNLEYVR	UniProtKB:P46109				1918663254	0	3.17964e-08	109.3	6.28923e-09	2	1352.66
GVAVDGLNQLTVTTGSEGLLK	UniProtKB:Q8NI36				3.65709e+08	0	1.14689e-05	109.28	2.03546e-09	2	1036.57
SLDDDLDGVPLDATEDSK	UniProtKB:O15042				1486639903	0	4.86136e-05	109.27	5.77147e-09	2	952.936
EQVDAALGAEEMVEMLTDR	UniProtKB:Q14203				4.34665e+08	0	1.07499e-05	109.27	5.9714e-09	2	1053.99
ATLQAALcLENFSSQVVER	UniProtKB:P59998	C8(Carbamidomethyl)			559458784	0	4.86136e-05	109.25	4.72192e-09	2	1068.54
ILLLcVGEAGDTVQFAEYIQK	UniProtKB:P49721	C5(Carbamidomethyl)			1114158320	0	8.36395e-07	109.23	3.26018e-09	2	1184.13
ScQMNLVADLVQEVQQAR	UniProtKB:Q13158	C2(Carbamidomethyl)			345393484	0	4.86136e-05	109.21	5.49791e-09	2	1045.01
NMDPLNDNIATLLHQSSDK	UniProtKB:P35579				2724933658	0	1.42083e-06	109.2	5.70054e-09	2	1063.51
LPVTNEMVHNLVAIELAYINTK	UniProtKB:O00429				264432044	0	6.9201e-06	109.19	2.15641e-09	3	828.12
TILQGSSEGTGLSALLPQPK	UniProtKB:Q92733				131667984	0	3.48436e-05	109.15	1.88752e-09	2	999.055
LAIIHcAGYSDPILVQTLWQDIIEK	UniProtKB:O75694	C6(Carbamidomethyl)			909380204	0	3.13093e-07	109.09	2.80531e-09	2	1448.77
GmYGIENEVFLSLPcILNAR	UniProtKB:P07195	M2(Oxidation); C15(Carbamidomethyl)			7141929590	0	7.0188e-06	109.06	5.37946e-09	2	1156.58
TGGTVSDQALLFGDDDAGEGPSSLIR	UniProtKB:Q9GZR7				254024795	0	6.08397e-06	109.03	6.52198e-09	2	1289.62
ASVVTASSGSALQYDTLISLMEHLK	UniProtKB:Q5T4S7				860460144	0	1.55789e-05	109.03	4.08897e-09	3	874.456
AAELEMELNEHSLVIDTLK	UniProtKB:Q9UHV9				585897132	0	3.23694e-06	109.02	4.5063e-09	2	1078.05
QLAPGMVQQMQSVcSDcNGEGEVINEK	UniProtKB:O60884	C14(Carbamidomethyl); C17(Carbamidomethyl)			250956480	0	3.7155e-05	108.98	8.27074e-09	3	1003.45
TPMSVLQQAGGSMMDGPGPR	UniProtKB:Q9UQ35				1630221458	0	3.14754e-05	108.97	6.3427e-09	2	1008.96
SDVEIPATVTAFSFEDDTVPLSPLK	UniProtKB:Q9UEY8				8.32539e+07	0	4.18983e-05	108.93	4.97359e-09	2	1339.68
LTAQVASLTSELTTLNATIQQQDQELAGLK	UniProtKB:Q14980				271721660	0	2.03488e-06	108.93	2.39244e-09	3	1062.58
AANAAENDFSVSQAEMSSR	UniProtKB:Q8NE71				3.04269e+08	0	4.86136e-05	108.85	6.30733e-09	2	992.941
TDMDNQIVVSDYAQMDR	UniProtKB:P50991				6005774810	0	4.86136e-05	108.83	6.21927e-09	2	1000.94
LSEVEEAQEASMETDPKP	UniProtKB:Q6I9Y2				437202248	0	1.85796e-05	108.81	6.59519e-09	2	995.454
LDNLTLMEINTSGTFLTQALNHMYK	UniProtKB:Q9Y248				761038416	0	3.23901e-06	108.81	5.39637e-09	2	1434.72
GHYTEGAELVDSVLDVVR	UniProtKB:Q13885;UniProtKB:Q9BVA1;UniProtKB:P68371;UniProtKB:Q13509;UniProtKB:P07437				7850893716	0	4.43747e-05	108.78	5.03051e-09	2	979.997
VLAPASTLQSSYQIPTENSMTAR	UniProtKB:Q14126				681485408	0	2.99801e-06	108.77	5.2379e-09	2	1233.12
HEAGEALGAIGDPEVLEILK	UniProtKB:Q9BU89				1121866052	0	3.35283e-06	108.76	3.35607e-09	2	1031.05
TEDGGEFEEGASENNAK	UniProtKB:O43719				4689959366	0	4.86136e-05	108.73	4.71901e-09	2	892.368
VLNNMEIGTSLFDEEGAK	UniProtKB:P00558				22009784432	0	4.86136e-05	108.72	6.10488e-09	2	983.977
RQWIVFDGDVDPEWVENLNSVLDDNK	UniProtKB:Q14204				148649969	0	7.48755e-06	108.69	7.79673e-09	3	1034.83
LAQDFLDSQNLSAYNTR	UniProtKB:Q9NY33				1007910084	0	4.86136e-05	108.66	6.00874e-09	2	978.479
GYDYGPHFQGILEASLEGDSGR	UniProtKB:P49327				653076642	0	1.75602e-07	108.66	7.72824e-09	2	1184.55
GFGDGYNGYGGGPGGGNFGGsPGYGGGR	UniProtKB:P22626	S21(Phospho)	1	Y(6): 0.0; Y(9): 0.0; S(21): 100.0; Y(24): 0.0	289968288	0	4.86136e-05	108.66	5.73713e-09	2	1288.01
YGDGGSTFQSTTGHcVHMR	UniProtKB:P31943	C15(Carbamidomethyl)			52430814412	0	1.18274e-05	108.63	6.47193e-09	3	699.971
VAPAPAAADAEVEQTDAESK	UniProtKB:O43823				842445554	0	4.3079e-05	108.59	6.30422e-09	2	985.476
VLVNVLTSDQTEDVLEAVAAK	UniProtKB:Q15036				375471196	0	2.11217e-05	108.52	3.15166e-09	2	1107.6
NLPIMSTASVEIDDALYSR	UniProtKB:A0AVT1				930307712	0	4.86136e-05	108.51	5.92042e-09	2	1048.02
HTGPGLLSMANQGQNTNNSQFVITLK	UniProtKB:P49792				379445709	0	4.86136e-05	108.5	5.89311e-09	3	924.135
IPEINSSDMSAHVTSPSGR	UniProtKB:O75369				5190882593	0	9.15503e-06	108.49	6.55725e-09	2	992.978
GEGAGQPSTSAQGQPAAPAPQK	UniProtKB:P52926				2.25755e+09	0	1.26767e-05	108.49	6.40505e-09	2	1018
LLASEIYDILQSSNMADGDSFNEMNSR	UniProtKB:Q9NVT9				444019243	0	3.68703e-05	108.49	8.95914e-09	3	1007.46
IVEIGDENATLDGTDVLFTGR	UniProtKB:O95865				115852600	0	6.84001e-06	108.48	6.6795e-09	2	1118.05
NQIIAcNGSIQSIPEIPDDLK	UniProtKB:P23921	C6(Carbamidomethyl)			396050724	0	6.40535e-06	108.46	4.42223e-09	2	1163.11
aLcNGDSKLENAGGDLK	UniProtKB:P49915	N-Term(Acetyl); C3(Carbamidomethyl)			398750837	0	4.86136e-05	108.41	6.46933e-09	2	902.434
DVEPEDPMFLMDPFAIHR	UniProtKB:Q15773				252181459	0	4.86136e-05	108.4	7.83428e-09	3	720.336
HFIDVGAGVIDEDYR	UniProtKB:P33316				366431292	0	2.3109e-05	108.37	6.25411e-09	2	853.413
LWEVQcESPTFTVAWHPK	UniProtKB:Q96J01	C6(Carbamidomethyl)			8036547600	0	4.86136e-05	108.36	6.87758e-09	2	1108.04
VEcYDYDNDGSHDLIGTFQTTMTK	UniProtKB:O75131	C3(Carbamidomethyl)			3040882216	0	2.82306e-07	108.33	9.05152e-09	2	1405.61
ASRLPGPTGSVVSTGTSFSSSSPGLASAGAAEGK	UniProtKB:Q7Z434				517779044	0	6.08489e-07	108.32	5.61098e-09	3	1026.86
NAEQNGPVDGQGDNPGPQAAEQGTDTAVPSDSDK	UniProtKB:P34932				11058794294	0	4.86136e-05	108.29	1.03094e-08	3	1122.83
LNFSHGTHEYHAETIK	UniProtKB:P14618				37813247036	0	4.86136e-05	108.25	6.65077e-09	2	942.456
TAAVGEIcEEGLHVLEGLAASGLR	UniProtKB:Q9NXH9	C8(Carbamidomethyl)			271796030	0	2.29312e-06	108.24	5.09968e-09	2	1226.63
MTTETASEDDNFGTAQSNK	UniProtKB:Q92616				932625732	0	1.50171e-05	108.21	6.7191e-09	2	1023.93
SIYDDISSPGLGSTPLTSR	UniProtKB:Q8NFH5				1280076816	0	4.86136e-05	108.19	6.10234e-09	2	983.493
QITAQAWDGTTDYQVEETSR	UniProtKB:O43719				672016181	0	6.81076e-06	108.19	8.50458e-09	2	1150.03
ESRQEEMNSQQEEEEmETDAR	UniProtKB:Q13435	M16(Oxidation)			3.87174e+08	0	4.86136e-05	108.19	6.87831e-09	3	867.685
KFNALFAQGNYSEAAK	UniProtKB:Q00610				1931125959	0	2.0792e-05	108.17	5.6047e-09	2	879.948
mYSYVTEELPQLINANFPVDPQR	UniProtKB:P10768	M1(Oxidation)			1587032628	0	2.79982e-05	108.17	7.56311e-09	2	1370.67
INNVIDNLIVAPGTFEVQIEEVR	UniProtKB:Q12905				2786019102	0	4.45554e-05	108.16	3.24379e-09	3	861.466
QVLGQMVIDEELLGDGHSYSPR	UniProtKB:P28070				2656684912	0	9.66032e-06	108.14	7.2081e-09	2	1222.1
STGEAFVQFASQEIAEK	UniProtKB:P31943;UniProtKB:P55795				33358159096	0	4.86136e-05	108.13	6.51255e-09	2	921.452
VYTDVQQVASSLTHPR	UniProtKB:Q14166				2970834777	0	4.86136e-05	108.12	4.9319e-09	2	900.969
VLQQTLNYINQGVSHALTWK	UniProtKB:O95373				5354711842	0	4.78986e-06	108.11	3.12837e-09	2	1157.13
mMcGAPSATQPATAETQHIADQVR	UniProtKB:P04080	N-Term(Acetyl); C3(Carbamidomethyl)			8273234776	0	3.88016e-06	108.09	9.16064e-09	2	1307.1
AVEILAQEMMTDLPSSFEEK	UniProtKB:P22307				254019693	0	4.86136e-05	108.08	7.94087e-09	2	1134.54
SGPFGQIFRPDNFVFGQSGAGNNWAK	UniProtKB:Q13885;UniProtKB:Q9BVA1;UniProtKB:P68371;UniProtKB:P04350;UniProtKB:P07437				334571643616	0	3.82945e-06	108.07	8.10889e-09	2	1399.68
EAAGTTAAAGTGGATEQPPR	UniProtKB:O43290				613021416	0	4.86136e-05	108.06	6.57616e-09	2	907.448
TFEHVTSEIGAEEAEEVGVEHLLR	UniProtKB:P51665				1861798368	0	1.67062e-08	107.99	7.84107e-09	3	894.442
ETFASTASQLHSNVVNYVQQIVAPK	UniProtKB:Q9H4A4				777432220	0	1.43127e-05	107.97	4.67194e-09	2	1366.22
VVAGQIFLDSEESELESSIQEEEDSLK	UniProtKB:Q9UBV2				111389530	0	4.86136e-05	107.97	9.30637e-09	3	1004.15
GAVVGIDLGTTNScVAVMEGK	UniProtKB:P38646	C14(Carbamidomethyl)			1377785754	0	4.86136e-05	107.94	6.54829e-09	2	1039.52
RIQEIIEQLDVTTSEYEK	UniProtKB:P10809				3961256944	0	1.11317e-05	107.94	5.64518e-09	2	1097.57
GGVSVAGHSLGSLILFDILSNQK	UniProtKB:Q9Y6Y8				1.25199e+08	0	3.00559e-06	107.93	2.25893e-09	2	1156.64
LcEPEVLNSLEETYSPFFR	UniProtKB:Q6PJT7	C2(Carbamidomethyl)			907821657	0	4.86136e-05	107.93	8.61051e-09	2	1165.55
APTADTQTQNVNQAK	UniProtKB:Q9Y5V3				218794499	0	4.86136e-05	107.9	6.43372e-09	2	793.893
GTGGVDTAATGGVFDISNLDR	UniProtKB:P12532				415123873	0	4.86136e-05	107.89	7.50516e-09	2	1011.99
ANPDPNccLGVFGLSLYTTER	UniProtKB:P62995	C7(Carbamidomethyl); C8(Carbamidomethyl)			2643683162	0	2.55799e-05	107.89	9.32577e-09	2	1192.55
VETGVLKPGMVVTFAPVNVTTEVK	UniProtKB:P68104;UniProtKB:Q5VTE0				175328815706	0	2.67976e-06	107.87	2.20707e-09	2	1258.2
EENIQTLLINPNIATVQTSQGLADK	UniProtKB:P27708				1185240568	0	5.60415e-06	107.87	3.66783e-09	2	1355.73
VIAINVDDPDAANYNDINDVK	UniProtKB:Q15181				8974515541	0	3.28246e-05	107.85	8.14717e-09	2	1144.56
VPAATSAIITNDGIGINPAQTAGNVFLK	UniProtKB:P61960				416719752	0	1.15765e-07	107.84	2.60222e-09	2	1377.25
DNTIEHLLPLFLAQLKDEcPEVR	UniProtKB:P30153	C19(Carbamidomethyl)			3088184353	0	4.39871e-07	107.78	4.92838e-09	3	917.481
VVVAENFDEIVNNENK	UniProtKB:P30101				12061086445	0	4.86136e-05	107.76	6.72238e-09	2	916.958
DVAcGANHTLVLDSQK	UniProtKB:Q9P258	C4(Carbamidomethyl)			3683225532	0	4.08359e-05	107.71	6.75532e-09	2	864.428
SVEDLQWSPTENTVFAScSADASIR	UniProtKB:Q9BQ67	C18(Carbamidomethyl)			459663378	0	4.86136e-05	107.71	1.06481e-08	3	924.091
AQTSTDAPTSAPSAPPSTPTPSAGK	UniProtKB:Q8IWZ8				1.77838e+08	0	1.38158e-05	107.62	8.11457e-09	2	1163.07
EVEELEQLTQQLMQDMEHPQR	UniProtKB:Q15942				4184302464	0	6.84702e-06	107.59	9.97533e-09	2	1306.11
LNEVSSDANRENAAAESGSESSSQEATPEK	UniProtKB:Q9H6Z4				8.35637e+08	0	2.50194e-06	107.58	1.15905e-08	3	1032.13
DcGGAAQLAGPAAEADPLGR	UniProtKB:Q9Y508	C2(Carbamidomethyl)			1282789608	0	4.86136e-05	107.56	8.29849e-09	2	948.95
EQSQPcADNAVLSSGLTAAR	UniProtKB:P19784	C6(Carbamidomethyl)			1481111852	0	4.86136e-05	107.56	8.3511e-09	2	1038
FLSHSLVELLNQISPTFK	UniProtKB:O75153				2708361773	0	7.14021e-06	107.52	2.63038e-09	2	1037.08
TPDDFLNSVDEMDTGDTINQSTLPSQQNR	UniProtKB:P46937				145249079	0	4.86136e-05	107.52	1.19704e-08	3	1080.16
ANPDPNTcLGVFGLSLYTTER	UniProtKB:Q13595	C8(Carbamidomethyl)			1282155128	0	2.39021e-05	107.48	8.81364e-09	2	1163.07
AAELIANSLATAGDGLIELR	UniProtKB:P35232				2389388908	0	4.86136e-05	107.47	2.89362e-09	2	999.555
SPMVEQAVQTGSADNLNAK	UniProtKB:Q9BX40				204396180	0	4.86136e-05	107.46	8.56178e-09	2	980.47
KLGVENcYFPMFVSQSALEK	UniProtKB:P07814	C7(Carbamidomethyl)			730140176	0	4.39221e-05	107.44	8.40657e-09	2	1174.08
VQDLFcSVGLNVNNPHFLIMQGR	UniProtKB:O95347	C6(Carbamidomethyl)			2039224585	0	8.55795e-07	107.44	6.50889e-09	3	886.788
VLSVDWTDTGLLLSGGADNK	UniProtKB:Q9GZL7				3415399560	0	2.10371e-05	107.42	6.42392e-09	2	1031.03
GHIISDGGcScPGDVAK	UniProtKB:Q9P2T1	C9(Carbamidomethyl); C11(Carbamidomethyl)			699640780	0	1.12095e-05	107.41	7.86209e-09	2	865.387
SGEDADLcSELLQESLDALR	UniProtKB:O95714	C8(Carbamidomethyl)			3.13233e+07	0	1.67425e-05	107.4	9.61894e-09	2	1111.02
GGVSAVAGGVTAVGSAVVNK	UniProtKB:Q8WUH6				1805891320	0	4.39047e-05	107.38	3.61141e-09	2	850.471
QVTITGSAASISLAQYLINAR	UniProtKB:Q15365				541062180	0	2.63761e-05	107.38	2.66263e-09	2	1089.1
TEDSGLQTQVIAAATQcALSTSQLVAcTK	UniProtKB:Q9Y490	C17(Carbamidomethyl); C27(Carbamidomethyl)			276532356	0	2.53421e-06	107.37	9.14142e-09	3	1018.17
MTGGGFGGcTVTLLEASAAPHAMR	UniProtKB:P51570	C9(Carbamidomethyl)			1111216376	0	7.6526e-07	107.36	9.88149e-09	3	798.046
HIVLSGGSTMYPGLPSR	UniProtKB:P61160				3200758336	0	3.14425e-05	107.3	5.73988e-09	2	886.466
GLAEVQQDGEAEEGATSDGEK	UniProtKB:Q02952				1.11828e+09	0	4.86136e-05	107.3	9.34861e-09	2	1060.47
SESEMETDSGVPQNTGMK	UniProtKB:Q4G0J3				1082500720	0	2.27874e-05	107.29	7.91532e-09	2	963.908
EYQLNDSASYYLNDLDR	UniProtKB:P08754				3.0515e+08	0	4.86136e-05	107.29	9.51107e-09	2	1039.97
LLESLQENHFQEDEQFLGAVMPR	UniProtKB:P49903				1613669028	0	5.01005e-08	107.28	9.90152e-09	2	1365.66
VQSGLDLFSMLLEQNDLEPGHTELLR	UniProtKB:Q13158				94208531	0	9.23284e-08	107.28	6.51372e-09	3	985.508
EAAVEALELLGATYVDK	UniProtKB:Q9BSK4				43839818	0	4.62359e-05	107.26	5.61728e-09	2	896.471
VQELGLSAPLTVLPTITcGHTIEILR	UniProtKB:P35520	C18(Carbamidomethyl)			9.96331e+09	0	5.32026e-08	107.24	1.80775e-09	2	1416.29
HATALEELSEQLEQAK	UniProtKB:P35580				1153384568	0	1.37568e-05	107.21	6.97411e-09	2	898.956
NITGTDDQVQQAMNSLK	UniProtKB:Q96PZ0				909082028	0	4.86136e-05	107.21	9.11852e-09	2	931.947
LASGEDDPFDSDFScPVK	UniProtKB:Q99567	C15(Carbamidomethyl)			1110988212	0	4.86136e-05	107.2	8.46025e-09	2	993.426
EAGGNYTPALTEQEVYAQVAR	UniProtKB:Q96ST3				8.99531e+07	0	4.86136e-05	107.18	8.92426e-09	2	1134.06
SNELGDVGVHcVLQGLQTPScK	UniProtKB:P13489	C11(Carbamidomethyl); C21(Carbamidomethyl)			3079097896	0	4.6416e-07	107.18	9.79525e-09	2	1199.58
YcAYNIGDQSAINELMQMR	UniProtKB:Q9UHB9	C2(Carbamidomethyl)			524168168	0	4.86136e-05	107.17	1.06851e-08	2	1139.01
VDLNSNGFIcDYELHELFK	UniProtKB:P13797	C10(Carbamidomethyl)			9749550624	0	4.86136e-05	107.16	1.04616e-08	2	1157.04
HTDNVIQWLNAMDEIGLPK	UniProtKB:P46940				1033379110	0	6.74056e-07	107.12	8.06147e-09	2	1097.55
ELGLVDGQELAVADVTTPQTVLFK	UniProtKB:Q8TBC4				1697421824	0	4.86136e-05	107.08	3.7698e-09	2	1272.19
TILQGNYIQYSGDPLQDFTLMR	UniProtKB:Q03701				252966668	0	2.42919e-05	107.07	8.64958e-09	2	1287.14
FGLALAVAGGVVNSALYNVDAGHR	UniProtKB:P35232				5.36286e+08	0	4.86136e-05	107.04	4.75659e-09	3	791.092
ETLLNGVGYLHEGLSPMER	UniProtKB:O75643				1150919756	0	4.86136e-05	106.97	8.21819e-09	2	1058.03
AEGSDVANAVLDGADcImLSGETAK	UniProtKB:P14618	C16(Carbamidomethyl); M18(Oxidation)			1477563996	0	6.26832e-06	106.96	1.18367e-08	2	1255.58
DLEAEHVEVEDTTLNR	UniProtKB:Q9H3K6				6260251119	0	4.86136e-05	106.95	9.21586e-09	2	935.446
QcLEDSDAGASNEYDSSPAAWNK	UniProtKB:P46063	C2(Carbamidomethyl)			65247910	0	3.95726e-06	106.95	1.04178e-08	2	1258.03
IFTDLQSEGFPVIETSTLTEEGVIK	UniProtKB:Q9BZE4				1811136136	0	5.51037e-06	106.9	6.34164e-09	2	1377.22
HGTcAAQVDALNSQK	UniProtKB:O00584	C4(Carbamidomethyl)			139638446	0	1.52555e-05	106.88	8.46925e-09	2	800.385
AAGDTTVIENSDVSPETESSEK	UniProtKB:Q86UP2				1002523961	0	1.59696e-05	106.87	1.14565e-08	2	1133.52
LDEYLNSPLPDEIDENSMEDIK	UniProtKB:Q9Y696				1868948784	0	1.47914e-05	106.87	1.18604e-08	2	1290.1
VcLcQGSAGSGAIGPVEAAIR	UniProtKB:Q9Y3E2	C2(Carbamidomethyl); C4(Carbamidomethyl)			201740551	0	4.86136e-05	106.86	7.97258e-09	2	1037.02
TQDASGPELILPASIEFR	UniProtKB:P55196				538205778	0	3.99294e-05	106.85	6.22299e-09	2	972.511
DKLDGNELDLSLSDLNEVPVK	UniProtKB:Q96AG4				969371972	0	4.86136e-05	106.8	6.86961e-09	2	1157.1
NSNLVGAAHEELQQSR	UniProtKB:P02545				3152216772	0	4.86136e-05	106.77	8.42879e-09	2	876.937
YGEVEEMNVcDNLGDHLVGNVYVK	UniProtKB:Q01081	C10(Carbamidomethyl)			6454308368	0	1.53104e-07	106.74	1.2869e-08	2	1377.14
NLNDSSLFVSAEEFGHLLDENMGSK	UniProtKB:Q03701				175534652	0	9.83233e-07	106.74	1.28161e-08	2	1377.14
HFADLLPGFLQAVNDScYQNDDSVLK	UniProtKB:O00410	C17(Carbamidomethyl)			4321610472	0	1.97358e-05	106.74	1.1884e-08	3	989.478
LRGDAAAGPGPGAGAGAAAEPEPR	UniProtKB:Q6DKJ4				1746223492	0	1.38663e-05	106.72	8.65833e-09	3	706.025
DYPVVSIEDPFDQDDWGAWQK	UniProtKB:P06733				18751045938	0	3.46682e-05	106.66	1.28807e-08	2	1255.56
DLLHSEGSENEGPVSSSSSDcR	UniProtKB:Q9NY27	C21(Carbamidomethyl)			901281400	0	3.81651e-05	106.64	1.18714e-08	2	1175.01
LLNQLQYcEEAGIPLVAIIGEQELK	UniProtKB:P12081	C8(Carbamidomethyl)			1856320796	0	7.95058e-08	106.62	5.2657e-09	2	1421.26
GTVLLADNVIcPGAPDFLAHVR	UniProtKB:P21964	C11(Carbamidomethyl)			2527370128	0	6.8189e-06	106.56	5.40961e-09	2	1168.12
LQNLDALTNLTVLSMQSNR	UniProtKB:Q15435				4.40154e+08	0	4.86136e-05	106.55	5.96318e-09	2	1066.06
DPDAGIDEAQVEQDAQALFQAGELK	UniProtKB:P08758				75815527	0	4.59061e-05	106.47	1.20602e-08	3	886.762
ATQFTGATGAIMTTETTK	UniProtKB:Q14126				479784786	0	4.86136e-05	106.45	9.24654e-09	2	915.458
KSQIFSTASDNQPTVTIK	UniProtKB:P11021				2291478720	0	6.69421e-06	106.45	6.14511e-09	2	983.02
mSINAEEVVVGDLVEVK	UniProtKB:P05023	M1(Oxidation)			963280106	0	2.41893e-05	106.38	7.69947e-09	2	923.981
FANSLVGVQQQLQAFNTYR	UniProtKB:Q01082				752792400	0	4.39257e-05	106.38	8.10798e-09	2	1092.56
DLLMEEDDMALANVVMQEAQK	UniProtKB:P42695				35509878	0	4.22424e-06	106.35	1.28221e-08	2	1197.06
YDSIPVSTSLLGDTSDTTSTGLAQR	UniProtKB:Q5JS54				3.57343e+08	0	4.47852e-06	106.32	1.16381e-08	2	1293.13
LRGWFDAEGQALDGVSISDLK	UniProtKB:P27694				613741376	0	4.86136e-05	106.3	9.26674e-09	2	1139.08
GTLSDEHAGVISVLAQQAAK	UniProtKB:O43504				2837229130	0	3.28892e-06	106.29	6.12197e-09	2	998.031
LGAASLGAEDPETQVVLINAVK	UniProtKB:Q9Y490				451315932	0	6.37148e-06	106.27	4.09897e-09	2	1098.1
DQLSVLENGVDIVVGTPGRLDDLVSTGK	UniProtKB:Q92499				4623005342	0	4.86136e-05	106.27	4.90743e-09	2	1448.78
AMEVDERPTEQYSDIGGLDK	UniProtKB:P17980				5332460752	0	2.78839e-06	106.23	1.26406e-08	2	1127.03
GQFYQcDLDGNLLDSWEGVR	UniProtKB:Q9H7D7	C6(Carbamidomethyl)			379645012	0	2.04828e-05	106.21	1.37257e-08	2	1186.53
IVEAAENEYQTAISENYQTMSDTTFK	UniProtKB:P47755				724066600	0	4.86136e-05	106.18	1.58174e-08	3	995.123
EESESTAVGQAHSDISK	UniProtKB:Q02952				3.37609e+08	0	4.86136e-05	106.16	1.13619e-08	2	887.911
MYSYVTEELPQLINANFPVDPQR	UniProtKB:P10768				1482902852	0	4.86136e-05	106.15	1.12558e-08	2	1362.67
HLYTLDGGDIINALcFSPNR	UniProtKB:P63244	C15(Carbamidomethyl)			7343391736	0	6.20711e-07	106.13	1.11225e-08	2	1138.56
mLLDPMGGIVmTNDGNAILR	UniProtKB:P49368	M1(Oxidation); M11(Oxidation)			1416786972	0	2.04143e-05	106.08	1.07717e-08	2	1082.04
cDNDNDcGDNSDEAGcSHScSSTQFK	UniProtKB:Q07954	C1(Carbamidomethyl); C7(Carbamidomethyl); C16(Carbamidomethyl); C20(Carbamidomethyl)			45125144	0	2.19455e-06	106.08	5.18485e-09	3	989.678
YNVYPTYDFAcPIVDSIEGVTHALR	UniProtKB:P07814	C11(Carbamidomethyl)			602209516	0	9.38699e-08	106.06	1.34388e-08	2	1450.7
VWGNVGTVEWADPIEDPDPEVMAK	UniProtKB:O60506				1273351968	0	4.86136e-05	106	1.40628e-08	2	1327.63
LGQAELVVIDEAAAIPLPLVK	UniProtKB:Q9H0A0				1026206056	0	4.86136e-05	105.99	9.61753e-10	2	1080.14
VPYPVFESNPEFLYVEGLPEGIPFR	UniProtKB:P78347				2454852124	0	3.38572e-08	105.96	9.64997e-09	2	1448.24
LHLSGIDANPNALFPPVEFPAPR	UniProtKB:P49327				50082530676	0	7.93323e-07	105.94	5.96595e-09	2	1236.66
RNDFQLIGIQDGYLSLLQDSGEVR	UniProtKB:P63241				17989579224	0	2.21573e-06	105.94	9.22971e-09	3	912.803
EHAPSIIFMDEIDSIGSSR	UniProtKB:P62195				651225109	0	4.86136e-05	105.92	1.23094e-08	2	1052.51
VINDLFSDVLEEGELDMEK	UniProtKB:Q9NQW6				1.3716e+08	0	3.98009e-05	105.87	1.28958e-08	2	1098.03
EAALTSEEVGADLEQVEVLQK	UniProtKB:Q13813				1290566815	0	2.30738e-05	105.87	7.58217e-09	2	1129.59
FAEFEDFPETSEPVWILGR	UniProtKB:Q9Y4P1				1449249860	0	4.86136e-05	105.86	1.33341e-08	2	1135.05
DLGLPTEAYISVEEVHDDGTPTSK	UniProtKB:P51665				1061003588	0	3.49041e-06	105.86	1.38542e-08	2	1287.12
EGTIGDmAILGITESFQVK	UniProtKB:P78371	M7(Oxidation)			476762416	0	4.55351e-05	105.82	9.64015e-09	2	1013.02
EEEGTGVVHQAPYFGAEDYR	UniProtKB:P41252				1668632944	0	4.85804e-05	105.82	1.46409e-08	2	1127.51
IAIPGLAGAGNSVLLVSNLNPER	UniProtKB:P26599				20682481942	0	4.20101e-06	105.78	2.84852e-09	2	1138.14
LHQLAMQQSHFPmTHGNTGFSGIESSSPEVK	UniProtKB:Q15366	M13(Oxidation)			2431518868	0	4.86136e-05	105.78	1.69511e-08	4	850.405
ISNTAISISDHTALAQFcK	UniProtKB:P22102	C18(Carbamidomethyl)			4160389256	0	1.54421e-05	105.77	1.03424e-08	2	1039.03
LLDTNPEINQSDSQDSR	UniProtKB:Q14669				367334364	0	4.86136e-05	105.76	1.277e-08	2	966.457
SAAPGSLGYQWLSDGSGVFEIAEASGVR	UniProtKB:Q12931				220565840	0	5.7032e-08	105.71	1.4384e-08	2	1406.18
NSGQNLEEDMGQSEQK	UniProtKB:Q9HAV7				3.24996e+09	0	4.86136e-05	105.69	1.13561e-08	2	897.386
EQAGGDATENFEDVGHSTDAR	UniProtKB:P00167				2075825810	0	4.86136e-05	105.69	1.2732e-08	2	1103.47
sQKQEEENPAEETGEEK	UniProtKB:O43768	N-Term(Acetyl)			2.04432e+09	0	6.53877e-06	105.67	1.2826e-08	2	1002.44
LNAVVNDFWAEISESVDK	UniProtKB:Q99460				598979672	0	4.57775e-05	105.66	1.17092e-08	2	1018.5
VLGPYTFSIcDTSNFSDYIR	UniProtKB:P22314	C10(Carbamidomethyl)			9357784880	0	3.25236e-05	105.66	1.49608e-08	2	1178.05
VNVDIINFGEEEVNTEK	UniProtKB:A2A3N6;UniProtKB:P55036				2477796730	0	4.86136e-05	105.64	1.19529e-08	2	974.979
HLMLPDFDLLEDIESK	UniProtKB:P13010				23878120108	0	1.7602e-05	105.63	1.06662e-08	2	957.983
VFQTEAELQEVISDLQSK	UniProtKB:Q92878				1969705600	0	4.59955e-05	105.63	9.59122e-09	2	1032.53
AGTLSITEFADMLSGNAGGFR	UniProtKB:Q15149				808288312	0	4.86136e-05	105.62	1.2799e-08	2	1058.01
ISQAEEEDQQLLGHLLLVAK	UniProtKB:Q9BX68				2.06519e+09	0	3.26041e-06	105.62	5.1569e-09	2	1117.61
LQQELDDLLVDLDHQR	UniProtKB:P35579				5209755680	0	3.13317e-05	105.61	9.41291e-09	3	650.67
ALAPTWEQLALGLEHSETVK	UniProtKB:Q8NBS9				9187827781	0	3.53136e-06	105.59	7.28931e-09	2	1097.08
FPSNSPVTHVAANTQPGLATPAVITVTANR	UniProtKB:P50851				1600532181	0	7.25318e-07	105.59	5.78617e-09	3	1011.21
GDNVAVIGEIDEETDSALDLGNIR	UniProtKB:O95777				1060221381	0	5.04612e-07	105.58	1.2869e-08	2	1258.12
mGQAPSQSLLPPAQDQPR	UniProtKB:Q9UQ35	M1(Oxidation)			1360058640	0	4.86136e-05	105.56	1.08687e-08	2	968.988
AVVNEDTQGNVSQLQAEVK	UniProtKB:Q9NS87				0	0	2.69964e-05	105.55	8.72335e-09	2	1015.03
aALTAEHFAALQSLLK	UniProtKB:Q9P000	N-Term(Acetyl)			915152128	0	4.86136e-05	105.45	4.48465e-09	2	863.484
DGELPVEDDIDLSDVELDDLGKDEL	UniProtKB:Q15084				962291865	0	1.94414e-06	105.4	1.69812e-08	2	1379.64
cPSIAAAIAAVNALHGR	UniProtKB:Q14498	C1(Carbamidomethyl)			3882649078	0	9.48123e-06	105.36	7.20839e-09	3	564.64
LMcSLcHcPGATIGcDVK	UniProtKB:Q8IWS0	C3(Carbamidomethyl); C6(Carbamidomethyl); C8(Carbamidomethyl); C15(Carbamidomethyl)			638222296	0	1.97272e-06	105.29	1.42739e-08	2	1039.95
NNEESPTATVAEQGEDITSKK	UniProtKB:Q13451				3517718945	0	4.86136e-05	105.25	1.54076e-08	2	1124.53
VQLDTIQGELNAPTQFK	UniProtKB:Q7Z3B4				876679928	0	4.86136e-05	105.16	7.84223e-09	2	951.507
VmQQQQQTTQQQLPQK	UniProtKB:Q15459	M2(Oxidation)			4.05513e+08	0	3.77042e-05	105.14	1.134e-08	2	979.497
LSEEEILENPDLFLTSEATDYGR	UniProtKB:Q14257				508476273	0	1.75309e-05	105.13	1.62489e-08	2	1321.14
NPSIVGVLcTDSQGLNLGcR	UniProtKB:O43504	C9(Carbamidomethyl); C19(Carbamidomethyl)			832618416	0	2.66125e-05	105.09	1.40948e-08	2	1080.53
FYSQAIELNPSNAIYYGNR	UniProtKB:P53041				1890090752	0	3.1572e-05	105.09	1.48506e-08	2	1110.54
GPIPSGMQGPSPINMGAVVPQGSR	UniProtKB:P33240				321684768	0	2.67241e-07	105.09	1.21202e-08	2	1167.59
FYFVGDEDLLEIIGNSK	UniProtKB:Q14204				4151973597	0	4.86136e-05	105.04	1.23796e-08	2	979.993
VAAASGHcGAFSGSDSSR	UniProtKB:Q9NZB2	C8(Carbamidomethyl)			1744944512	0	4.86136e-05	104.99	1.30285e-08	2	862.377
TAFDEAIAELDTLNEESYK	UniProtKB:P31946				25392313624	0	4.86136e-05	104.96	1.73173e-08	2	1080
MLLADQGQSWKEEVVTVETWQEGSLK	UniProtKB:P09211				2631281300	0	2.36056e-06	104.94	1.49508e-08	3	997.831
LLEAHEEQNVDSYTESVK	UniProtKB:P54920				1600888704	0	5.71205e-06	104.93	1.57003e-08	2	1046
EQFSQGSPSNcLETSLAEIFPLGK	UniProtKB:Q9NQ88	C11(Carbamidomethyl)			656706024	0	3.74295e-05	104.93	1.75434e-08	2	1320.13
DPNSQVGAcIVNSENK	UniProtKB:P32321	C9(Carbamidomethyl)			2.18118e+08	0	4.86136e-05	104.87	1.42733e-08	2	866.405
KTGLSSEQTVNVLAQILK	UniProtKB:P35269				257125520	0	4.14573e-06	104.86	2.82009e-09	2	965.056
NmAEQIIQEIYSQIQSK	UniProtKB:P29401	M2(Oxidation)			1058630896	0	4.86136e-05	104.86	1.37493e-08	2	1020.01
TDADSESDNSDNNTIFVQGLGEGVSTDQVGEFFK	UniProtKB:Q92804				579719323	0	2.78559e-06	104.84	2.33637e-08	3	1208.21
GVMGGQSAGPQHTEAETIQK	UniProtKB:O60763				5004626802	0	4.86136e-05	104.81	1.5572e-08	2	1013.49
HYGFQLYQSDPSGNYGGWK	UniProtKB:P25789				2927019136	0	2.96281e-07	104.81	1.75443e-08	2	1102.5
HLNEIDLFHcIDPNDSK	UniProtKB:Q15185	C10(Carbamidomethyl)			21226468056	0	1.39169e-05	104.79	1.62695e-08	2	1033.99
NFSLLSFGEEAEEEEEEVNR	UniProtKB:Q6UX04				234894519	0	3.61255e-05	104.78	1.85358e-08	2	1179.02
LQEELSQAESTIDELK	UniProtKB:Q14203				612476792	0	4.86136e-05	104.76	1.30754e-08	2	916.96
FVTAIWNLLVTTGQEVK	UniProtKB:P55060				3.26895e+08	0	4.86136e-05	104.74	4.50392e-09	2	960.04
GDADQASNILASFGLSAR	UniProtKB:P43243				5326134339	0	4.86136e-05	104.71	1.47667e-08	2	896.941
LLTETEDWLYEEGEDQAK	UniProtKB:Q92598				5.9842e+09	0	4.86136e-05	104.71	1.76791e-08	2	1085
DYNTLQEALSNMDDYDK	UniProtKB:Q96SY0				4.13195e+08	0	4.86136e-05	104.68	1.5383e-08	2	1017.94
LHISPSNMTNQNTNEYLEK	UniProtKB:Q13547				4997212328	0	2.95554e-07	104.68	1.74868e-08	2	1117.04
IEGcIIGFDEYMNLVLDDAEEIHSK	UniProtKB:P62304	C4(Carbamidomethyl)			7902710362	0	1.34843e-06	104.68	2.04211e-08	3	970.791
VLGQLTETGVVSPEQFMK	UniProtKB:Q96EK6				1089131719	0	4.86136e-05	104.66	9.94989e-09	2	982.019
LISLTDENALSGNEELTVK	UniProtKB:P14625				3539017969	0	3.53238e-05	104.64	1.04253e-08	2	1023.54
LQTASDESYKDPTNIQSK	UniProtKB:Q13813				7369144582	0	7.25767e-06	104.61	1.51591e-08	2	1013
ELTEGGEVTNLIPDIATELR	UniProtKB:Q9UJA3				5.97976e+07	0	4.86136e-05	104.61	9.55485e-09	2	1085.57
VFIMDNcEELIPEYLNFIR	UniProtKB:P07900	C7(Carbamidomethyl)			1241083461	0	2.82377e-05	104.61	1.58665e-08	2	1208.1
QLLDETSAITLTSTWK	UniProtKB:O14776				206065000	0	4.86136e-05	104.58	9.86317e-09	2	903.977
GGTVADLDEQDEETVTAGGK	UniProtKB:Q92922				108485862	0	4.86136e-05	104.54	1.72546e-08	2	996.46
DVPFFEGLEGSIDTGITVSR	UniProtKB:Q02952				553539400	0	3.2668e-05	104.51	1.47121e-08	2	1070.04
LSSIIDcTGTASYHGFLPVLVR	UniProtKB:Q7Z6Z7	C7(Carbamidomethyl)			1381522008	0	1.02664e-05	104.51	1.06182e-08	3	802.756
TEDSIRDYEDGMEVDTTPTVAGQFEDADVDH	UniProtKB:P54105				3004458084	0	3.07605e-06	104.5	2.32545e-08	3	1153.15
LSSLNQDNSLAEDNLK	UniProtKB:Q15643				284522854	0	4.86136e-05	104.49	1.4259e-08	2	880.941
GGAPAEGEGAAETLPEASR	UniProtKB:Q9Y6K1				136144400	0	1.20555e-05	104.44	1.58937e-08	2	885.421
IQEIIEQLDVTTSEYEK	UniProtKB:P10809				286018616	0	4.86136e-05	104.44	1.34187e-08	2	1019.52
LEQLDLGGNDLEVLPDTLGALPNLR	UniProtKB:Q14160				0	0	4.93879e-07	104.42	5.74642e-09	2	1338.23
DILQScQTSEEcELAR	UniProtKB:Q9UNW1	C6(Carbamidomethyl); C12(Carbamidomethyl)			913214841	0	4.86136e-05	104.38	1.72912e-08	2	969.93
LQNELDNVSTLLEEAEKK	UniProtKB:P35580				1893813196	0	4.20542e-05	104.38	1.18271e-08	2	1037.04
LmSSNSTDLPLNIEcFMNDK	UniProtKB:Q92598	M2(Oxidation); C15(Carbamidomethyl)			228553912	0	4.86136e-05	104.37	2.08718e-08	2	1173.03
VSHVSTGGGASLELLEGK	UniProtKB:P07205;UniProtKB:P00558				7284551086	0	2.15905e-05	104.36	9.72342e-09	2	870.966
FVLSGANIMcPGLTSPGAK	UniProtKB:Q9ULC4	C10(Carbamidomethyl)			1586014184	0	4.86136e-05	104.35	1.36115e-08	2	960.488
EIGINEDQFQEAcTSPLAK	UniProtKB:Q96G28	C13(Carbamidomethyl)			3.32789e+08	0	4.86136e-05	104.34	1.87175e-08	2	1075.51
VNPTVFFDIAVDGEPLGR	UniProtKB:P62937				54287581164	0	4.86136e-05	104.33	1.22002e-08	2	973.506
LGNDFMGITLASSQAVSNAR	UniProtKB:Q9HC38				872476924	0	4.19954e-05	104.33	1.50856e-08	2	1026.51
TNMLLQLDGSTPIcEDIGR	UniProtKB:O75439	C14(Carbamidomethyl)			722370201	0	4.86136e-05	104.33	1.67645e-08	2	1067.02
HQTLQGLAFPLQPEAQR	UniProtKB:Q6IBS0				632373088	0	4.86136e-05	104.26	9.32745e-09	2	967.518
VQAMQISSEKEEDDNEK	UniProtKB:Q9UKY7				11563171142	0	1.13704e-05	104.26	1.82049e-08	2	990.447
QTIDNSQGAYQEAFDISKK	UniProtKB:P27348				9743699914	0	4.86136e-05	104.26	1.81806e-08	2	1072.02
LTYQDAVNLQNYVEEK	UniProtKB:O95071				324274173	0	4.86136e-05	104.23	1.61639e-08	2	963.978
SQEATEAAPScVGDMADTPR	UniProtKB:Q9UHD8	C11(Carbamidomethyl)			448934725	0	3.20446e-05	104.23	1.74363e-08	2	1046.95
VESPGTYQQDPWAMTDEEK	UniProtKB:O00170				670884558	0	4.86136e-05	104.21	1.86888e-08	2	1105.98
TAEELMNFSKGEENLMDAQVK	UniProtKB:P50990				2192681550	0	4.86136e-05	104.2	2.08268e-08	2	1192.57
NISQDMTQTSGTNLTSEELRK	UniProtKB:P54252				433564356	0	4.86136e-05	104.16	1.8322e-08	3	785.052
VIESEDYGQQLEIVcLIDPGcFR	UniProtKB:Q9Y3A5	C15(Carbamidomethyl); C21(Carbamidomethyl)			356700784	0	7.52497e-07	104.16	2.13687e-08	2	1370.65
VVcVYGGTGISEQIAELK	UniProtKB:Q7L014	C3(Carbamidomethyl)			973017216	0	4.86136e-05	104.14	1.21908e-08	2	962.003
FELAcLANLcPETAEESK	UniProtKB:O15514	C5(Carbamidomethyl); C10(Carbamidomethyl)			977999144	0	4.86136e-05	104.14	1.97654e-08	2	1041.48
VVLDVGSGTGILcMFAAK	UniProtKB:Q99873	C13(Carbamidomethyl)			4439334140	0	4.86136e-05	104.13	1.16664e-08	2	919.483
AVTDSINQLITMcTQQAPGQK	UniProtKB:Q9Y490	C13(Carbamidomethyl)			732421952	0	4.13667e-05	104.09	1.71847e-08	2	1152.57
ITVPGNFQGHSGAQcITcSYK	UniProtKB:Q08945	C15(Carbamidomethyl); C18(Carbamidomethyl)			24089080151	0	2.91082e-05	104.06	2.13618e-08	2	1163.04
IDVLLQQIEELGSEGKVEEAQGMMK	UniProtKB:O95232				352100892	0	1.66356e-07	104.05	1.51123e-08	2	1387.7
GHAGSVDSIAVDGSGTK	UniProtKB:Q9GZL7				440314075	0	4.86136e-05	104.04	1.381e-08	2	779.397
NETGGGEGVEVLVNEPYEK	UniProtKB:Q00169				827823986	0	6.96146e-06	104.03	1.90349e-08	2	1010.48
cSVTLLNETDILSQYLEK	UniProtKB:O94776	C1(Carbamidomethyl)			153996138	0	4.86136e-05	103.99	1.57136e-08	2	1063.54
ELLNALFSNPMDDNLIcAVK	UniProtKB:Q9H074	C17(Carbamidomethyl)			1565505650	0	4.86136e-05	103.99	1.82334e-08	2	1139.07
LAQLTLEQILEHLDNLR	UniProtKB:Q68E01				1932645626	0	1.04131e-05	103.95	5.17089e-09	2	1010.07
TFTDcFNcLPIAAIVDEK	UniProtKB:P62140;UniProtKB:P62136;UniProtKB:P36873	C5(Carbamidomethyl); C8(Carbamidomethyl)			2458532064	0	4.86136e-05	103.95	2.03916e-08	2	1057.49
APPAPGPASGGSGEVDELFDVK	UniProtKB:O14579				4394078730	0	1.69474e-05	103.93	1.8475e-08	2	1049.01
LSENNIQTIFAVTEEFQPVYK	UniProtKB:P05556				127292422	0	4.86136e-05	103.9	1.24332e-08	2	1235.64
IIGFGSALLEEVDPNPANFVGAGIIHTK	UniProtKB:O94973				1358710300	0	3.88765e-06	103.9	8.72812e-09	3	960.517
NEVNGTSEDIKSEGDTQSN	UniProtKB:O95232				352871219	0	4.86136e-05	103.88	1.88894e-08	2	1012.44
KQGGLGPMNIPLVSDPK	UniProtKB:Q06830				68466288616	0	4.09235e-06	103.81	8.13729e-09	2	875.983
AALSSQQQQQLALLLQQFQTLK	UniProtKB:Q6Y7W6				561205564	0	1.16499e-05	103.8	4.5147e-09	2	1243.2
ITVVGVGQVGmAcAISILGK	UniProtKB:P07195	M11(Oxidation); C13(Carbamidomethyl)			1333361028	0	4.86136e-05	103.78	7.45662e-09	2	995.049
LFEYGGFPPESNYLFLGDYVDR	UniProtKB:P62136;UniProtKB:P36873				1057558583	0	2.99452e-06	103.77	2.3687e-08	2	1299.61
HSSGIVADLSEQSLK	UniProtKB:Q15435				309426680	0	4.38899e-05	103.73	1.3116e-08	2	785.912
EIAIDVPNVSWSDIGGLESIK	UniProtKB:Q8NB90				594233214	0	4.86136e-05	103.72	1.31738e-08	2	1121.59
INSQLVAQQVAQQYATPPPPKK	UniProtKB:Q8N488				882537986	0	4.86136e-05	103.71	5.44553e-09	3	802.782
HEQVENcLLTSPFEDIFK	UniProtKB:Q14181	C7(Carbamidomethyl)			640669068	0	3.91658e-06	103.7	2.13034e-08	2	1103.53
LEGMLSQSVSSQYNMAGVR	UniProtKB:P54105				1570322184	0	4.86136e-05	103.68	2.06196e-08	2	1028.99
VDVGGSEPASLSYLSFEGATK	UniProtKB:Q9NQT5				488724168	0	4.86136e-05	103.68	1.83612e-08	2	1057.53
FGAVFLWDSGSSVGEITGHNK	UniProtKB:O75083				539964010	0	6.6767e-06	103.65	2.08704e-08	3	736.695
AETLMTVTDPVHDIAFAPNLGR	UniProtKB:Q96EE3				1765167132	0	1.62184e-05	103.62	1.86427e-08	2	1184.6
ENDWGFSNFMAWSEVTDPEK	UniProtKB:Q93009				52160231	0	3.92811e-05	103.59	2.31668e-08	2	1195.01
VLLSIcSLLcDPNPDDPLVPEIAR	UniProtKB:P61077;UniProtKB:P62837	C6(Carbamidomethyl); C10(Carbamidomethyl)			6.70191e+09	0	2.503e-05	103.59	1.43748e-08	2	1353.7
DSKLEMEVLENLQELK	UniProtKB:Q9BW85				374234066	0	4.86136e-05	103.56	1.45559e-08	2	959.498
GLAYVEYENESQASQAVMK	UniProtKB:Q15020				258749714	0	4.86136e-05	103.55	2.22176e-08	2	1059
McLAADVPLIESGTAGYLGQVTTIK	UniProtKB:Q9UBT2	C2(Carbamidomethyl)			1060061651	0	1.14232e-05	103.54	1.41097e-08	2	1304.68
RLFAQLAGDDMEVSATELMNILNK	UniProtKB:P04632				783878982	0	1.66362e-05	103.53	1.52668e-08	3	893.795
SLEQEDQEDITAFDLSPDNEVLVTASR	UniProtKB:Q12788				151301496	0	4.86136e-05	103.52	2.66356e-08	3	1007.81
TFDEcVAEGGSDcAPEK	UniProtKB:Q7LGA3	C5(Carbamidomethyl); C13(Carbamidomethyl)			2.33828e+08	0	4.86136e-05	103.48	1.55804e-08	2	936.375
ASLPTLGFTHFQPAQLTTVGK	UniProtKB:P30566				5605659072	0	4.86136e-05	103.48	8.60694e-09	2	1107.61
HLMTLVMDPLQTASVQWFER	UniProtKB:P30566				4383778741	0	2.51995e-07	103.43	1.81123e-08	2	1201.61
VIQAQTAFSANPANPAILSEASAPIPHDGNLYPR	UniProtKB:O00560				1411108384	0	5.39937e-07	103.41	1.54323e-08	3	1177.61
QATTIIADNIIFLSDQTK	UniProtKB:Q04837				872115372	0	4.86136e-05	103.4	9.58742e-09	2	996.54
ELDPTNmTYITNQAAVYFEK	UniProtKB:P31948	M7(Oxidation)			395974822	0	4.78684e-05	103.4	2.5165e-08	2	1182.56
LMNESLMLVTALNPHIGYDK	UniProtKB:P07954				4.50863e+09	0	1.6461e-05	103.39	1.59777e-08	2	1130.08
QFYDQALQQAVVDDDANNAK	UniProtKB:P60033				680540510	0	4.12627e-05	103.38	2.45487e-08	2	1127.02
ASASGSGAQVGGPISSGSSASSVTVTR	UniProtKB:P02545				0	0	4.86136e-05	103.35	2.10453e-08	3	789.058
LTTPTYGDLNHLVSATMSGVTTSLR	UniProtKB:Q9BUF5				2117826816	0	1.20517e-07	103.34	1.63064e-08	2	1318.18
mTDQEAIQDLWQWR	UniProtKB:P06748	M1(Oxidation)			23057816768	0	4.86136e-05	103.29	2.29156e-08	2	918.427
VLAVNQENEHLMEDYEK	UniProtKB:O43707				7396580808	0	2.97114e-05	103.29	2.32883e-08	2	1030.98
YGDGGSSFQSTTGHcVHMR	UniProtKB:P55795	C15(Carbamidomethyl)			12868914620	0	1.64394e-05	103.28	2.12768e-08	3	695.298
GTELDcGIETDSGVDDDMAcHK	UniProtKB:P42574	C6(Carbamidomethyl); C20(Carbamidomethyl)			502912786	0	3.98796e-05	103.28	2.17162e-08	3	808.997
LHLQSTDYGNFLANEASPLTVSVIDDR	UniProtKB:P61421				787716128	0	1.19112e-05	103.26	2.00509e-08	3	992.502
AEDNADTLALVFEAPNQEK	UniProtKB:P12004				8.70283e+09	0	4.86136e-05	103.24	2.21637e-08	2	1038
VGEVcHITcKPEYAYGSAGSPPK	UniProtKB:Q02790	C5(Carbamidomethyl); C9(Carbamidomethyl)			46074473440	0	5.68368e-06	103.24	2.63845e-08	2	1254.09
NVIDGDLcEQFNSmEPNK	UniProtKB:Q15393	C8(Carbamidomethyl); M14(Oxidation)			641618916	0	3.11123e-05	103.19	2.32719e-08	2	1063.46
DQSSWQNSDASQEVGGHQER	UniProtKB:Q9C0C2				672653552	0	4.86136e-05	103.19	2.47399e-08	3	748.991
QITIIDSPSFIVSPLNSSSALALR	UniProtKB:Q9BVP2				334126711	0	6.34155e-07	103.19	4.15209e-09	2	1265.22
EGNSPSFFNPEEAATVTSYLK	UniProtKB:Q9HCE1				330387818	0	4.86136e-05	103.18	2.55542e-08	2	1144.54
LTTPTYGDLNHLVSATmSGVTTcLR	UniProtKB:Q13885;UniProtKB:Q9BVA1;UniProtKB:P68371;UniProtKB:P04350;UniProtKB:P07437	M17(Oxidation); C23(Carbamidomethyl)			11636845236	0	7.34897e-07	103.16	2.22907e-08	2	1362.68
ILGGVISAISEAAAQYNPEPPPPR	UniProtKB:P04632				1650751360	0	4.86136e-05	103.15	1.00659e-08	2	1224.16
GLETTATYDPETQEFILNSPTVTSIK	UniProtKB:Q15067				146442128	0	2.11935e-05	103.11	2.19332e-08	2	1428.21
LSSGDPSTSPSLSQTTPSK	UniProtKB:Q99504				1361461434	0	4.86136e-05	103.09	2.1001e-08	2	938.964
mQAQMQMQMQGGDGDGGALGHHV	UniProtKB:Q15019	M1(Oxidation)			1591562933	0	4.20508e-06	103.04	2.51598e-08	3	800.672
LLQYSDALEHLLTTGQGVVLER	UniProtKB:O95299				668655816	0	4.58821e-07	103.02	8.95248e-09	2	1228.17
LDLLSDTNMVDFAMDVYK	UniProtKB:P60228				6.46074e+08	0	4.86136e-05	103.01	2.46467e-08	2	1045.49
VFIMDScDELIPEYLNFIR	UniProtKB:P08238	C7(Carbamidomethyl)			1396048938	0	3.77512e-05	103.01	2.38241e-08	2	1187.59
EGRPSGEAFVELESEDEVK	UniProtKB:P31943				4911095998	0	4.86136e-05	102.99	2.47931e-08	2	1054
AILFSQPLQITDTQQGcIAPVELR	UniProtKB:Q8NBF2	C17(Carbamidomethyl)			808386420	0	5.03279e-06	102.99	1.16016e-08	2	1349.72
EIGWTDVGGWTGQGGSILGTK	UniProtKB:Q01813				453429774	0	4.86136e-05	102.98	2.15624e-08	2	1060.03
VcLYLTScVNYVPEPENSALLR	UniProtKB:Q13200	C2(Carbamidomethyl); C8(Carbamidomethyl)			1009720980	0	4.86136e-05	102.98	2.23957e-08	2	1299.14
SLEEFNDVYLVTHLMGADLNNIVK	UniProtKB:Q16539				2109620586	0	6.98906e-08	102.96	1.97651e-08	2	1367.69
AYHEQLSVAEITNAcFEPANQMVK	Ensembl:CON_ENSBTAP00000016242;UniProtKB:Q71U36;UniProtKB:P68363;UniProtKB:Q13748;UniProtKB:Q6PEY2;UniProtKB:P68366	C15(Carbamidomethyl)			21452335368	0	2.57072e-07	102.96	2.88522e-08	2	1375.65
IIGLDQVAGMSETALPGAFK	UniProtKB:P35579				3568725792	0	3.30985e-05	102.92	1.37453e-08	2	1009.54
VQIEAAQcPDVVVAQIDPK	UniProtKB:O14893	C8(Carbamidomethyl)			203344310	0	7.86611e-06	102.91	1.47492e-08	2	1040.55
NAQAIEDMVGYAQETQHEK	UniProtKB:Q99460				2981271530	0	3.274e-05	102.9	2.68893e-08	2	1081.5
AFTKPEEAcSFILSADFPALVVK	UniProtKB:P22102	C9(Carbamidomethyl)			4638432372	0	1.76795e-07	102.89	1.50743e-08	2	1270.67
VQLNVFDEQGEEDSYDLK	UniProtKB:O60610				4.17183e+08	0	4.86136e-05	102.87	2.65154e-08	2	1064.49
KEDGTFYEFGEDIPEAPER	UniProtKB:O43776				1517229116	0	2.82684e-06	102.84	2.82722e-08	2	1115
GLYSDTELQQcLAAAQAASQHVFR	UniProtKB:Q9NQT4	C11(Carbamidomethyl)			3129551832	0	1.8529e-06	102.83	2.64168e-08	3	888.768
INEELESQYQQSMDSK	UniProtKB:O00193				3364746154	0	4.86136e-05	102.78	2.58369e-08	2	964.936
EGTIGDMAILGITESFQVK	UniProtKB:P78371				7195496610	0	4.86136e-05	102.78	1.58248e-08	2	1005.03
YFEITDESPYVHYLNTFSSK	UniProtKB:Q9ULV4				688524476	0	1.77322e-06	102.78	2.9604e-08	2	1220.57
LcTQLEGLQSTVTGHVER	UniProtKB:Q6P2E9	C2(Carbamidomethyl)			2528285756	0	1.69494e-05	102.75	1.96401e-08	3	676.68
VHAVIGVLMDDTDPLVTVMK	UniProtKB:P62191				376652504	0	3.11512e-06	102.75	1.35349e-08	2	1077.07
GDNQAGGAAAAAAAPEPPPR	UniProtKB:O14654				1568486372	0	2.82664e-05	102.72	2.30825e-08	2	894.934
VNINGGAVSLGHPIGMSGAR	UniProtKB:P24752				3759589280	0	3.40827e-05	102.67	1.53493e-08	2	954.004
YIAENGTDPINNQPLSEEQLIDIK	UniProtKB:Q9UMS4				1499220406	0	4.53448e-06	102.65	2.18522e-08	2	1357.69
ALIELNMDSPEELQSYIQK	UniProtKB:Q9H9F9				129844302	0	4.86136e-05	102.63	2.28427e-08	2	1111.06
VLYcGVcSLPTEYcEYMPDVAK	UniProtKB:O43583	C4(Carbamidomethyl); C7(Carbamidomethyl); C14(Carbamidomethyl)			1564934512	0	4.86136e-05	102.63	3.3354e-08	2	1327.59
SLVEIIEHGLVDEQQK	UniProtKB:O75533				2940606784	0	4.86136e-05	102.59	1.45523e-08	2	918.991
IIVDTYGGWGAHGGGAFSGK	UniProtKB:P31153;UniProtKB:Q00266				1891902144	0	2.5196e-05	102.53	2.43716e-08	2	975.479
TLTAVHDAILEDLVFPSEIVGK	UniProtKB:P62081				49604595088	0	8.24277e-07	102.49	1.02582e-08	2	1184.15
ATcAPQHGAPGPGPADASK	UniProtKB:P21333	C3(Carbamidomethyl)			2875477392	0	4.86136e-05	102.45	2.62497e-08	3	597.283
LGcEVLGVSVDSQFTHLAWINTPR	UniProtKB:P32119	C3(Carbamidomethyl)			5.73376e+08	0	3.69551e-07	102.44	2.192e-08	2	1350.19
SSSSVTTSETQPcTPSSSDYSDLQR	UniProtKB:P50552	C13(Carbamidomethyl)			430574656	0	8.30805e-07	102.44	3.44465e-08	2	1354.09
HDADGQATLLNLLLR	UniProtKB:O43242				1718115520	0	1.59502e-05	102.43	1.1541e-08	2	825.455
TVSLGAGAKDELHIVEAEAMNYEGSPIK	UniProtKB:P06748				39068348230	0	4.10876e-08	102.43	2.42593e-08	2	1465.24
DNFWEMGDTGPcGPcSEIHYDR	UniProtKB:P49588	C12(Carbamidomethyl); C15(Carbamidomethyl)			2310452008	0	3.06713e-06	102.42	2.29577e-08	2	1322.02
LVQAAQMLQSDPYSVPAR	UniProtKB:P18206				622279077	0	4.86136e-05	102.41	1.88224e-08	2	987.512
TFNLTAGSLESTEPIYVYK	UniProtKB:Q6P996				567157216	0	4.86136e-05	102.41	2.19341e-08	2	1067.04
STSNETMQAVEDGDSK	UniProtKB:Q2KHR3				2.60747e+08	0	4.86136e-05	102.38	2.12595e-08	2	849.861
AVEVAGNYDGESSDELR	UniProtKB:Q13315				2.75335e+07	0	4.86136e-05	102.36	2.666e-08	2	905.911
SELQDMEAQQVNEAESAR	UniProtKB:Q8TBA6				149951724	0	4.86136e-05	102.29	2.87605e-08	2	1017.96
LFcDFGDEFEVLDTTGEEPK	UniProtKB:A0AVT1	C3(Carbamidomethyl)			1313960910	0	4.86136e-05	102.28	3.33463e-08	2	1174.53
TIIGSFNGALAAVPVQDLGSTVIK	UniProtKB:Q9BWD1				3999583188	0	4.86136e-05	102.27	6.37098e-09	2	1186.17
LTSDPTDIPVVcLESDNGNIMIQK	UniProtKB:O43504	C12(Carbamidomethyl)			623098460	0	1.03083e-06	102.27	2.9252e-08	2	1330.15
ENAEVDGDDDAEEmEAK	UniProtKB:P05198	M14(Oxidation)			107685019	0	4.86136e-05	102.21	1.69771e-08	2	941.864
DMEQFFDDLSDSFSGTEPEVHK	UniProtKB:Q9UJX4				506712667	0	1.90633e-05	102.21	3.54091e-08	3	854.038
VENQENVSNLVIEDTELK	UniProtKB:Q01518				2328412025	0	4.86136e-05	102.16	2.02509e-08	2	1037.04
NcDYQQEADNScIYVNK	UniProtKB:P36954	C2(Carbamidomethyl); C12(Carbamidomethyl)			269318000	0	4.86136e-05	102.14	2.64507e-08	2	1060.94
LEQLILSDTGISSLHFPDAGIGcK	UniProtKB:Q15813	C23(Carbamidomethyl)			1331207216	0	5.67091e-07	102.14	2.20367e-08	2	1286.16
DSGSSSVSSTSSSSSSSPGDK	UniProtKB:Q9H7S9				4.51542e+07	0	4.86136e-05	102.08	2.46352e-08	2	960.401
QILVGDIGDTVEDPYTSFVK	UniProtKB:Q9Y281				3276231691	0	3.93201e-05	102.08	2.37339e-08	2	1098.56
QLSSSVTGLTNIEEENcQR	UniProtKB:P46940	C17(Carbamidomethyl)			403017446	0	3.15509e-05	102.05	3.21005e-08	2	1083.02
SALSSELSLVGDTTGDTLEK	UniProtKB:Q92793				434826578	0	4.86136e-05	102.04	2.48444e-08	2	1012.01
IAALQAFADQLIAAGHYAK	UniProtKB:Q13813				2.86367e+09	0	9.11494e-06	102.03	1.29834e-08	2	986.538
LVSQDNFGFDLPAVEAATK	UniProtKB:Q01082				2886163136	0	4.33349e-05	102.03	2.43314e-08	2	1011.51
mVEEVFSNAIDcLSDEDK	UniProtKB:P42285	M1(Oxidation); C12(Carbamidomethyl)			607392368	0	2.60262e-05	102.02	3.04074e-08	2	1058.96
SGETEDTFIADLVVGLcTGQIK	UniProtKB:P06733;UniProtKB:P13929;UniProtKB:P09104	C17(Carbamidomethyl)			1.80809e+08	0	2.68114e-05	102.02	2.58854e-08	2	1177.09
KPEEEEEEELEETAQEK	UniProtKB:O43818				6.13916e+08	0	3.54602e-06	102.01	3.17334e-08	2	1038.46
ELDAISTNEEEKEENEAESDVK	UniProtKB:P49642				1059478576	0	1.85352e-06	101.97	3.78784e-08	2	1254.56
LAEEEDLFDSAHPEEGDLDLASESTAHAQSSK	UniProtKB:Q15424;UniProtKB:Q14151				1222879428	0	2.96205e-07	101.95	4.42476e-08	3	1143.51
LcYGLNMDFVDPAQITMK	UniProtKB:P23921	C2(Carbamidomethyl)			1394835988	0	4.86136e-05	101.93	3.26825e-08	2	1058.5
LSLQDAVSQGVIDQDMATR	UniProtKB:P15924				478281898	0	4.10639e-05	101.91	2.60116e-08	2	1024.01
ELQEGTYVMVAGPSFETVAEcR	UniProtKB:P00491	C21(Carbamidomethyl)			893203904	0	9.5385e-06	101.91	3.60026e-08	2	1237.08
AAPTAASDQPDSAATTEK	UniProtKB:Q9BRP8				1.44465e+09	0	4.55152e-05	101.9	2.82086e-08	2	866.409
MSPDEGQEELEEVQAELK	UniProtKB:Q9HC07				247826016	0	4.86136e-05	101.9	3.25797e-08	2	1030.97
SHFEQWGTLTDcVVMRDPNTK	UniProtKB:Q32P51;UniProtKB:P0C7M2;UniProtKB:P09651	C12(Carbamidomethyl)			7361700415	0	1.19384e-05	101.83	3.67179e-08	2	1261.09
LHDINAQMVEDQGFLDSLR	UniProtKB:P63010				665248252	0	5.77464e-07	101.82	3.16958e-08	2	1101.04
TAFDDAIAELDTLNEDSYK	UniProtKB:P61981				12993296800	0	2.39208e-05	101.81	3.3552e-08	2	1065.99
EIETYHNLLEGGQEDFESSGAGK	UniProtKB:CON_P35527;UniProtKB:P35527				745269031	0	4.86136e-05	101.8	3.94038e-08	3	837.379
AFADALEVIPMALSENSGMNPIQTmTEVR	UniProtKB:P48643	M25(Oxidation)			7.98492e+08	0	3.8004e-05	101.8	3.68204e-08	3	1051.18
KLSGLNAFDIAEELVK	UniProtKB:O95983				1313696064	0	1.2773e-05	101.75	1.15857e-08	2	873.987
FFESFGDLSSADAILGNPK	UniProtKB:CON_Q3SX09				1132548080	0	4.86136e-05	101.74	3.12635e-08	2	1007.99
SINPDEAVAYGAAVQAAILmGDK	UniProtKB:P34931;UniProtKB:P08107	M20(Oxidation)			5215899493	0	3.04994e-05	101.74	2.9897e-08	3	774.053
TVLDLAVVLFETATLR	UniProtKB:P14625				1.81542e+08	0	4.86136e-05	101.71	5.97295e-09	2	881.011
ALTLQDLDNIWAAQAGK	UniProtKB:Q93008;UniProtKB:O00507				614508340	0	4.86136e-05	101.71	1.88834e-08	2	914.485
LQEVLDYLTNSASLQMK	UniProtKB:Q8TBC4				1717930744	0	4.86136e-05	101.7	2.14623e-08	2	977.008
ENPGFDFSGAEISGNYTK	UniProtKB:Q8WVJ2				856018289	0	4.86136e-05	101.66	3.26772e-08	2	966.939
QATSTSGPASAVADPPSTEK	UniProtKB:Q96IZ7				317277678	0	4.86136e-05	101.65	2.85807e-08	2	951.47
SPNPSLLHLcGSLAQLAcVEPVR	UniProtKB:Q5T4S7	C10(Carbamidomethyl); C18(Carbamidomethyl)			1039203698	0	2.86192e-07	101.63	2.10793e-08	3	840.107
aDVLDLHEAGGEDFAmDEDGDESIHK	UniProtKB:Q9Y5S9	N-Term(Acetyl); M16(Oxidation)			2170539484	0	1.96637e-05	101.62	4.19114e-08	3	958.409
TSDANETEDHLESLIcK	UniProtKB:Q09161	C16(Carbamidomethyl)			2797667896	0	4.86136e-05	101.6	3.37856e-08	2	981.443
TVEPPISQVGNVDTASELEK	UniProtKB:O95104				1381862634	0	4.86136e-05	101.57	2.57369e-08	2	1057.04
EHINLGcDMDFDIAGPSIR	UniProtKB:P21796	C7(Carbamidomethyl)			738811976	0	4.86136e-05	101.56	3.64861e-08	2	1080.5
NDLSIcGTLHSVDQYLNIK	UniProtKB:Q9Y333	C6(Carbamidomethyl)			2540939882	0	4.54773e-06	101.56	2.96714e-08	2	1095.55
GQEADLEAGGEEVPEANGSAGK	UniProtKB:Q9NX58				440204252	0	5.37804e-06	101.53	3.5586e-08	2	1057.98
LSEELQGLDQLQLDNDVLR	UniProtKB:P22415				227378484	0	4.42273e-05	101.52	2.32161e-08	2	1099.57
IKADPDGPEAQAEAcSGER	UniProtKB:Q9NX24	C15(Carbamidomethyl)			4916987898	0	1.58283e-05	101.51	3.53194e-08	2	1000.95
EAQRDYLDFLDDEEDQGIYQSK	UniProtKB:P25205				2933973440	0	4.08581e-06	101.48	4.25661e-08	2	1339.11
HLPNLLDETQIFSYFSQFGTVTR	UniProtKB:Q9BYG3				5.40937e+08	0	4.86136e-05	101.48	2.59735e-08	3	905.132
GISDPLTVFEQTEAAAR	UniProtKB:O00116				0	0	4.86136e-05	101.47	2.66857e-08	2	902.959
VLTFALSEEVRPQDTVSVIGGVAGGSK	UniProtKB:P55786				468035005	0	2.43255e-07	101.45	1.45126e-08	2	1358.73
FDVNTSAVQVLIEHIGNLDR	UniProtKB:Q00610				8755269950	0	1.41361e-06	101.41	2.13253e-08	2	1120.59
TSGGPEAADFSDQLSLGSSR	UniProtKB:Q9BWH6				110503908	0	4.86136e-05	101.39	3.43012e-08	2	991.457
TSQENISFETMYDVLSTKPVLNK	UniProtKB:Q13510				614111190	0	4.67471e-05	101.38	3.10726e-08	3	882.111
DDVcFFLSQSGETADTLMGLR	UniProtKB:Q06210	C4(Carbamidomethyl)			58930810	0	4.86136e-05	101.36	4.24865e-08	2	1181.53
IGGDAATTVNNSTPDFGFGGQK	UniProtKB:Q92945				10176673480	0	4.86136e-05	101.35	3.74107e-08	2	1077.51
VPVLQLDSGNYLFSTSAIcR	UniProtKB:P56192	C19(Carbamidomethyl)			1305742024	0	5.22819e-06	101.27	2.66258e-08	2	1120.58
NVEDFLALTGIESADK	UniProtKB:Q15361				204716984	0	4.86136e-05	101.26	2.81087e-08	2	861.434
eEEIAALVIDNGSGMcK	UniProtKB:P63261	N-Term(Acetyl); C16(Carbamidomethyl)			193344022	0	4.86136e-05	101.26	3.54408e-08	2	939.438
EALELTDTGLLSGSEER	UniProtKB:Q14204				3046117072	0	4.86136e-05	101.25	3.11918e-08	2	910.453
KLDVSIEMPEELDISQLR	UniProtKB:P45974				749487740	0	8.09863e-06	101.23	2.21336e-08	2	1058.06
VVSQYSSLLSPMSVNAVMK	UniProtKB:P50991				5673636096	0	2.97961e-05	101.22	2.33626e-08	2	1020.53
sGALDVLQmKEEDVLK	UniProtKB:P08865	N-Term(Acetyl); M9(Oxidation)			3.53758e+09	0	4.86136e-05	101.19	2.68395e-08	2	916.97
GIQQATTGVSQETSENPGNK	UniProtKB:P04150				53319729	0	4.86136e-05	101.18	3.61264e-08	2	1023.49
VEQNSEPcAGSSSESDLQTVFK	UniProtKB:Q8N806	C8(Carbamidomethyl)			372930052	0	4.03182e-05	101.18	4.38195e-08	2	1200.04
VWGNVVTVEWADPVEEPDPEVMAK	UniProtKB:O43390				924043888	0	2.48967e-05	101.16	4.00177e-08	2	1348.65
AQDPSEVLTmLTNETGFEISSSDATVK	UniProtKB:Q12905	M10(Oxidation)			60106994	0	4.86136e-05	101.12	4.38844e-08	3	962.796
GSDcGIVNVNIPTSGAEIGGAFGGEK	UniProtKB:P49419	C4(Carbamidomethyl)			411431494	0	9.84582e-06	101.09	4.11153e-08	2	1253.6
HTGccGDNDPIDVcEIGSK	UniProtKB:Q15181	C4(Carbamidomethyl); C5(Carbamidomethyl); C14(Carbamidomethyl)			9510810892	0	4.86136e-05	101.07	3.25939e-08	2	1067.44
GIASTSDPPTANIKPTPVVSTPSK	UniProtKB:P12270				4677734752	0	4.65632e-05	101.03	1.59192e-08	2	1183.14
HPSVESVVQcEIDEDVIQVSK	UniProtKB:P19623	C10(Carbamidomethyl)			653489870	0	7.4997e-06	101.03	3.87961e-08	2	1199.09
LLSGDTYEAVVTAVDPVADIATLR	UniProtKB:O43464				563173463	0	4.86136e-05	101.03	1.97767e-08	2	1245.16
VLALSVETDYTFPLAEK	UniProtKB:P05388				4995279172	0	4.86136e-05	100.95	1.94976e-08	2	948.51
AmADPEVQQIMSDPAMR	UniProtKB:P31948	M2(Oxidation)			2679564732	0	4.86136e-05	100.94	3.7438e-08	2	953.429
NLVDFLTGEEVVcHVAR	UniProtKB:Q9H9J2	C13(Carbamidomethyl)			584574766	0	4.86136e-05	100.94	2.97628e-08	2	979.497
TLENELDELDPDNALLPAGLR	UniProtKB:P28289				547324736	0	5.63831e-06	100.93	3.00211e-08	2	1154.59
YTPSGQAGAAASESLFVSNHAY	UniProtKB:P04075				20706428716	0	1.59264e-05	100.91	4.34472e-08	2	1114.52
VASMPLISSTcDMVSAAYASTK	UniProtKB:O60664	C11(Carbamidomethyl)			257112079	0	4.86136e-05	100.91	4.39257e-08	2	1145.54
LFSAGLNGEIMEYDLQALNIK	UniProtKB:Q969X6				0	0	4.15849e-05	100.87	3.07293e-08	2	1170.1
AAFDDAIAELDTLSEESYK	UniProtKB:P62258				6.67355e+10	0	1.44774e-05	100.85	4.1145e-08	2	1044.49
ELMGEEILGASLSAPLTSYK	UniProtKB:Q9P2J5				1792433934	0	6.68727e-06	100.85	2.7911e-08	2	1055.04
AADSDDGAVSAPAASDGGVSK	UniProtKB:Q96GM8				5.28454e+08	0	4.86136e-05	100.83	3.88403e-08	2	924.418
LATGSDDNcAAFFEGPPFK	UniProtKB:O75083	C9(Carbamidomethyl)			728992004	0	4.86136e-05	100.81	4.23224e-08	2	1022.46
VIHDNFGIVEGLmTTVHAITATQK	UniProtKB:P04406	M13(Oxidation)			4200606448	0	7.93841e-07	100.79	2.44269e-08	3	871.125
TQSSASLAASYAAQQHPQAAASYR	UniProtKB:Q96PK6				5165749072	0	1.64617e-06	100.76	4.21619e-08	3	822.401
YVSEVVIGAPYAVTAELLSHFK	UniProtKB:Q99447				567119816	0	4.86136e-05	100.73	1.81693e-08	3	798.432
DLDEDELLGNLSETELK	UniProtKB:Q9NYL9				1029374272	0	4.86136e-05	100.72	3.87013e-08	2	966.968
LNEQYEHASIHLWDLLEGK	UniProtKB:Q14444				1493408599	0	3.54532e-06	100.66	3.5881e-08	2	1148.08
VPSALAPASQEPSPAASAEADGK	UniProtKB:O00429				50551357	0	4.86136e-05	100.64	3.61631e-08	2	1076.04
sLYDDLGVETSDSKTEGWSK	UniProtKB:Q96I25	N-Term(Acetyl)			276973981	0	9.60504e-06	100.64	4.66699e-08	2	1130.03
EGQWDcSAcLVQNEGSSTK	UniProtKB:P49792	C6(Carbamidomethyl); C9(Carbamidomethyl)			4.2447e+08	0	1.55064e-05	100.54	4.13414e-08	2	1078.46
SNLETESSHQSVcTDTSATScNcK	UniProtKB:Q5TAX3	C13(Carbamidomethyl); C21(Carbamidomethyl); C23(Carbamidomethyl)			1.6421e+08	0	4.86136e-05	100.54	4.49311e-08	3	901.704
RSALQSINEWAAQTTDGKLPEVTK	UniProtKB:P50454				2.2833e+09	0	4.86136e-05	100.53	2.06409e-08	3	881.806
GEQQPISSPWDVVFGTSGSEVQR	UniProtKB:Q8NBF2				296805878	0	1.90002e-05	100.49	4.54782e-08	2	1245.6
GVNcIDYYSGGDKPYLISGADDR	UniProtKB:P35606	C4(Carbamidomethyl)			2122006926	0	1.53584e-07	100.49	5.15169e-08	2	1268.08
SmGSQEDDSGNKPSSYS	UniProtKB:Q9UNS2	M2(Oxidation)			1.46915e+08	0	3.31285e-05	100.4	2.72874e-08	2	896.352
VDcTAHSDVcSAQGVR	UniProtKB:Q8NBS9	C3(Carbamidomethyl); C10(Carbamidomethyl)			17115270412	0	4.86136e-05	100.39	3.93891e-08	2	881.387
SEDLDNSIDKTEAGIK	UniProtKB:Q9UQE7				317692612	0	4.86136e-05	100.38	3.79132e-08	2	867.926
VTTmDAELEFAIQPNTTGK	UniProtKB:P15311;UniProtKB:P26038;UniProtKB:P35241	M4(Oxidation)			419379932	0	4.86136e-05	100.38	4.29112e-08	2	1041.51
TAFDEAIAELDTLNEDSYK	UniProtKB:P27348				29793337755	0	4.67666e-05	100.38	4.70113e-08	2	1073
FQEHLQLQNLGINPANIGFSTLTMESDK	UniProtKB:Q00610				6919072524	0	5.90718e-06	100.33	4.10261e-08	3	1049.19
VLQIcAGHVPGVSALNLLSLLR	UniProtKB:Q9NSP4	C5(Carbamidomethyl)			886836127	0	3.18494e-05	100.32	4.07816e-09	3	777.459
LIAQAcVSIFPDSGHFNVDNIR	UniProtKB:P50990	C6(Carbamidomethyl)			2668048184	0	7.49612e-07	100.28	3.98136e-08	2	1237.12
VScLGVTDDGMAVATGSWDSFLK	UniProtKB:P62879;UniProtKB:P62873	C3(Carbamidomethyl)			4174568240	0	1.28779e-06	100.27	5.39589e-08	2	1208.56
PTGDFDSKPSWADQVEEEGEDDK	UniProtKB:O75821				7463596316	0	5.35931e-07	100.27	5.26574e-08	2	1291.05
EGTDSSQGIPQLVSNISAcQVIAEAVR	UniProtKB:Q99832	C19(Carbamidomethyl)			1402651178	0	4.51978e-05	100.25	3.95042e-08	2	1415.21
EVLQSLVDDGMVDcER	UniProtKB:Q9BWT6	C14(Carbamidomethyl)			3.08272e+08	0	4.86136e-05	100.24	4.58688e-08	2	932.927
mYSTDDGVQFHAFGR	UniProtKB:Q15029	M1(Oxidation)			1684967376	0	4.86136e-05	100.21	3.94315e-08	3	582.922
SETSTSDNTETYQENTSSSGHPTFK	UniProtKB:Q8WVD3				884756306	0	1.84634e-05	100.2	5.72136e-08	3	912.392
mVLVDLPGVINTVTSGMAPDTK	UniProtKB:O60313	M1(Oxidation)			208159512	0	4.86136e-05	100.15	3.30824e-08	2	1137.59
AAGGIELFVGGIGPDGHIAFNEPGSSLVSR	UniProtKB:P46926				278885428	0	1.55655e-08	100.14	3.37832e-08	2	1462.75
SSILLDVKPWDDETDMAQLEAcVR	UniProtKB:P29692	C22(Carbamidomethyl)			1622361288	0	7.43857e-08	100.13	5.41836e-08	2	1396.17
RVLEcLASGIVMPDGSGIYDPcEK	UniProtKB:Q12906	C5(Carbamidomethyl); C22(Carbamidomethyl)			868847256	0	1.42001e-05	100.12	5.34184e-08	2	1333.64
GDVAEGDLIEHFSQFGTVEK	UniProtKB:Q13151				3239195440	0	1.39432e-06	100.09	4.88717e-08	2	1089.52
DNLTLWTSDMQGDGEEQNK	UniProtKB:P62258				14184438503	0	4.86136e-05	100.09	5.09286e-08	2	1090.98
TAFDEAIAELDTLSEESYK	UniProtKB:P63104				629220224	0	2.38529e-05	100.08	4.94212e-08	2	1066.51
DDLDVTELTNEDLLDQLVK	UniProtKB:P42167;UniProtKB:P42166				0	0	4.86136e-05	100.08	3.71493e-08	2	1094.56
VIISAPSADAPMFVMGVNHEK	UniProtKB:P04406;UniProtKB:CON_P10096				35974714544	0	4.86136e-05	100.06	3.92095e-08	2	1107.06
LTGEEVNScVEVLLEEAK	UniProtKB:P49589	C9(Carbamidomethyl)			729915553	0	4.86136e-05	100.02	4.1593e-08	2	1010
SVDPENNPTLVEVLEGVVR	UniProtKB:Q9Y5L0				1449584580	0	4.86136e-05	99.99	2.79593e-08	2	1033.55
AcYLSINPQKDETLETEK	UniProtKB:P61163	C2(Carbamidomethyl)			1285397992	0	4.86136e-05	99.99	4.77849e-08	2	1070.02
DNmAQEGVILDDVDSSVcR	UniProtKB:Q9BV86	M3(Oxidation); C18(Carbamidomethyl)			141225728	0	1.68e-05	99.96	5.07755e-08	2	1069.97
SFcPGGTDSVSPPPSVITQENLGR	UniProtKB:Q9C0C9	C3(Carbamidomethyl)			235469948	0	6.89247e-07	99.95	5.05436e-08	2	1251.61
TYQELLVNQNPIAQPLASR	UniProtKB:Q9NX24				1479680400	0	4.86136e-05	99.93	2.19205e-08	2	1078.08
GHDLNEDGLVSWEEYK	UniProtKB:O43852				1453172718	0	3.22468e-05	99.92	4.7996e-08	2	945.927
SQVAELNDDDKDDEIVFK	UniProtKB:Q9BYG3				375841906	0	4.86136e-05	99.91	5.15677e-08	2	1040.49
LGHVVMGNNAVSPYQQVIEK	UniProtKB:P60228				14277291508	0	3.44701e-06	99.89	3.27234e-08	2	1092.07
TLTGTAALTVQSQEDNLR	UniProtKB:P09960				1352946906	0	4.86136e-05	99.86	3.43703e-08	2	959.497
YHTSQSGDEMTSLSEYVSR	UniProtKB:P08238				6984231456	0	2.31444e-06	99.83	5.25784e-08	2	1088.98
ILLSVVSMLAEPNDESGANVDASK	UniProtKB:P60604				1004158304	0	7.05273e-07	99.83	4.1446e-08	2	1230.12
ATGEADVEFVTHEDAVAAMSK	UniProtKB:P31942				4509203621	0	1.95897e-05	99.78	5.51701e-08	2	1089.5
YQAPDIDVQLSSELTDSLR	UniProtKB:Q9NZM5				102931737	0	1.88467e-05	99.77	4.5481e-08	2	1075.53
NAGGEEAALALAEGLHcGSALFR	UniProtKB:Q9BU89	C17(Carbamidomethyl)			2381711192	0	1.11263e-06	99.76	5.09016e-08	2	1157.57
KEDLVFIFWAPESAPLK	UniProtKB:P23528;UniProtKB:Q9Y281				11380332973	0	4.86136e-05	99.75	2.06978e-08	2	995.544
SSDPLGDTASNLGSAVDELmR	UniProtKB:Q7Z6Z7	M20(Oxidation)			0	0	2.61851e-05	99.75	5.32381e-08	2	1076
mEQMLGAFQSDLSSISSEIR	UniProtKB:Q8N1B4	M1(Oxidation)			2.07866e+08	0	4.86136e-05	99.73	5.60803e-08	2	1123.03
ITAFVPNDGcLNFIEENDEVLVAGFGR	UniProtKB:P62266	C10(Carbamidomethyl)			1373528700	0	4.86136e-05	99.68	5.50289e-08	3	999.49
LQIASDENYKDPTNLQGK	UniProtKB:Q13813				2440342786	0	4.86136e-05	99.66	4.19975e-08	2	1017.51
SQTIYEIIDNSQGFYVcPVEPQNR	UniProtKB:Q9Y617	C17(Carbamidomethyl)			1228560936	0	2.67359e-07	99.65	6.02447e-08	2	1429.19
NVASVcLQIGYPTVASVPHSIINGYK	UniProtKB:P05388	C6(Carbamidomethyl)			6530522688	0	9.74416e-07	99.63	2.87423e-08	3	929.826
QLVLQTGALVLSDNGIccIDEFDK	UniProtKB:P33991	C17(Carbamidomethyl); C18(Carbamidomethyl)			486051504	0	4.86136e-05	99.62	4.85746e-08	3	903.453
TNVFAPDYIAGVSPFVENDISSR	UniProtKB:Q9ULX3				625696727	0	1.72345e-05	99.61	5.02454e-08	2	1249.62
SPLIESTANMDNNQSQK	UniProtKB:O14974				1.37175e+08	0	4.86136e-05	99.58	5.17834e-08	2	938.94
SGTAETEPVEQDSSQPSLPLVR	UniProtKB:Q12888				108452746	0	4.86136e-05	99.58	5.07589e-08	2	1164.07
LLEPLVTQVTTLVNTNSK	UniProtKB:P35221				2472621021	0	4.86136e-05	99.57	1.082e-08	2	985.565
QQLAQYQQQQSQASAPSTSR	UniProtKB:Q15007				230919784	0	1.52688e-05	99.57	5.45139e-08	2	1118.04
IAQDLEMYGINYFEIK	UniProtKB:P15311				2192150237	0	4.86136e-05	99.55	4.65687e-08	2	973.985
aAGVEAAAEVAATEIKMEEESGAPGVPSGNGAPGPK	UniProtKB:P52272	N-Term(Acetyl)			1409799774	0	1.40172e-05	99.5	5.87938e-08	3	1131.22
VAIAALEVLEEENLAENADK	UniProtKB:P04181				6570845848	0	4.86136e-05	99.49	3.70332e-08	2	1071.06
VVIEAcDELGIILAHTNLR	UniProtKB:P31939	C6(Carbamidomethyl)			1017179222	0	4.86136e-05	99.47	2.29066e-08	3	712.723
AAFTVSLDPGPLEQFPHSMEPQLR	UniProtKB:Q9UKD2				3390682124	0	4.4668e-05	99.42	4.64923e-08	2	1334.17
ALRTDYNASVSVPDSSGPER	UniProtKB:P61978				1815163728	0	7.5597e-06	99.41	5.36329e-08	2	1061.02
LLEPIcDADPSALANYVVALVKK	UniProtKB:Q9P2N5	C6(Carbamidomethyl)			420977586	0	6.48035e-06	99.36	2.00179e-08	3	833.792
VIEINPYLLGTMAGGAADcSFWER	UniProtKB:P28074	C19(Carbamidomethyl)			936784907	0	1.78328e-06	99.32	6.44277e-08	2	1335.64
aMESTATAAVAAELVSADKIEDVPAPSTSADK	UniProtKB:P49321	N-Term(Acetyl)			560159364	0	6.52928e-08	99.32	6.35155e-08	3	1063.51
LSSSMYSSQGSSGSSQSK	UniProtKB:Q15648				0	0	4.86136e-05	99.31	5.03458e-08	2	897.893
HLLPTSGAAATAAAAAAAAAAVTAASTSYYGR	UniProtKB:Q9BWF3				6711186859	0	2.83491e-06	99.31	4.11265e-08	4	727.127
NSTGSQDGPVSNPSSSNSSQDSLHK	UniProtKB:Q13136				530698728	0	4.86136e-05	99.29	6.89194e-08	3	839.711
HGLEVIYMIEPIDEYcVQQLK	UniProtKB:P07900	C16(Carbamidomethyl)			17630780912	0	2.60667e-07	99.22	5.23394e-08	2	1289.14
AHSGAAPWQPLAAPSGASAQAAEQLQR	UniProtKB:P51617				709428068	0	1.88317e-06	99.21	4.86517e-08	3	891.118
HVSPAGAAVGIPLSEDEAK	UniProtKB:P31939				6167072544	0	6.85341e-07	99.2	4.00715e-08	2	924.48
ITFTGEADQAPGVEPGDIVLLLQEK	UniProtKB:O60884				1154542034	0	4.86136e-05	99.19	3.00837e-08	2	1320.7
LLEDFLQEGEEPDEDDAYQVLSTLK	UniProtKB:Q8N3U4				4.3221e+08	0	6.40643e-07	99.19	6.79761e-08	2	1448.7
DLNSQADSLmTSSAFDTSQVK	UniProtKB:Q13813	M10(Oxidation)			80121594	0	4.86136e-05	99.18	6.66532e-08	2	1131.02
ELLQDGcYSDFLNEDFDVK	UniProtKB:Q9UP83	C7(Carbamidomethyl)			300199672	0	4.86136e-05	99.14	6.8812e-08	2	1154.01
ETcVSGEDPTQGADLSPDEK	UniProtKB:Q02952	C3(Carbamidomethyl)			2246662318	0	3.73627e-05	99.09	5.80792e-08	2	1067.96
ISVMGGEQAANVLATITK	UniProtKB:Q9HCC0				53527846	0	4.86136e-05	99.07	2.82012e-08	2	901.989
HGLLVPNNTTDQELQHIR	UniProtKB:P56537				5.16463e+09	0	3.95018e-05	99.04	3.60369e-08	3	695.704
TGDFQLHTNVNDGTEFGGSIYQK	UniProtKB:P45880				1724924242	0	4.45562e-05	99.03	7.25213e-08	2	1264.59
HYGPGWVSmANAGK	UniProtKB:P23284	M9(Oxidation)			1021181400	0	4.86136e-05	99.01	4.93243e-08	2	745.848
VVVVDDLLATGGTmNAAcELLGR	UniProtKB:P07741	M14(Oxidation); C18(Carbamidomethyl)			955269368	0	1.76624e-06	98.96	5.04164e-08	2	1195.61
LIFPYVELDLHSYDLGIENR	UniProtKB:O75874				1374491540	0	4.78297e-05	98.96	4.11094e-08	3	802.753
TAPATMSTPTILVATAVHAYR	UniProtKB:Q5T1M5				757469234	0	4.86136e-05	98.93	3.15943e-08	3	724.724
QVEHPLLSGLLYPGLQALDEEYLK	UniProtKB:P54577				10547441856	0	2.07913e-05	98.92	2.95641e-08	2	1363.23
VMEMFQPSAVVLQcGSDSLSGDR	UniProtKB:Q13547	C14(Carbamidomethyl)			474787435	0	4.86136e-05	98.91	7.49579e-08	3	838.387
SGGNSYGSGGASYNPGSHGGYGGGSGGGSSYQGK	UniProtKB:Q12906				1264381166	0	5.46028e-08	98.91	7.8094e-08	3	1004.75
DTVTISGPQAPVFEFVEQLRK	UniProtKB:P49327				9238706496	0	3.14156e-05	98.85	3.14259e-08	2	1181.13
AAAIGIDLGTTYScVGVFQHGK	UniProtKB:P08107	C14(Carbamidomethyl)			1163537450	0	6.05907e-06	98.82	5.41807e-08	3	755.717
LAQMISDHNDADFEEK	UniProtKB:Q14157				2732152392	0	4.86136e-05	98.81	6.18616e-08	2	931.917
GAGYTFGQDISETFNHANGLTLVSR	UniProtKB:P62714;UniProtKB:P67775				2.01983e+09	0	1.58546e-05	98.79	6.63621e-08	2	1328.15
GALDTTDGYMGVNQAPEK	UniProtKB:Q9UPN3;UniProtKB:Q96PK2				124349046	0	4.86136e-05	98.78	6.3383e-08	2	933.928
YGFSDPLTFSSVVELINHYR	UniProtKB:P27986				145850901	0	2.85599e-05	98.78	6.00854e-08	3	782.058
ALVNLAADPGLHETLLAADPGLPAR	UniProtKB:P0CB43;UniProtKB:Q9BTY7				805919290	0	1.07986e-06	98.77	2.01764e-08	2	1248.19
NGTIELmEPLDEEISGIVEVVGR	UniProtKB:P35244	M7(Oxidation)			0	0	4.86136e-05	98.77	4.55097e-08	2	1258.15
YITDVLTEEDALEILQK	UniProtKB:Q7L5Y1				53884397	0	4.86136e-05	98.73	3.80602e-08	2	997.025
TSETGIVDQVMVTLNQEGYK	UniProtKB:P30876				345311480	0	2.22602e-05	98.69	6.3277e-08	2	1106.54
NLNLNDESQHGLLMQLLK	UniProtKB:Q9UIA9				1222581326	0	2.35541e-05	98.67	3.94115e-08	2	1040.55
LALEDSENTASTNcDSSSEGLEK	UniProtKB:Q49AR2	C14(Carbamidomethyl)			523313508	0	5.71912e-06	98.67	7.57192e-08	2	1229.04
LSEGSQPAEEEEDQETPSR	UniProtKB:Q9UKV3				2.23203e+09	0	2.5092e-05	98.66	6.61866e-08	2	1059.46
TcNcETEDYGEKFDENDVITcFANFESDEVELSYAK	UniProtKB:Q00839	C2(Carbamidomethyl); C4(Carbamidomethyl); C21(Carbamidomethyl)			0	0	1.90319e-05	98.64	8.6926e-08	3	1443.6
IPSAVGYQPTLATDMGTMQER	UniProtKB:P06576				3611212284	0	1.02029e-05	98.63	6.87292e-08	2	1133.55
NLDPEQMSQVLDAMFEK	UniProtKB:P31323				456398643	0	4.86136e-05	98.61	6.76003e-08	2	997.964
TTESGSDSESKPDQEAEPQEAAGAQGR	UniProtKB:Q9Y2J2				1.14321e+08	0	7.3719e-07	98.6	8.69987e-08	3	921.41
ILPFLSTEQAADILMTTAR	UniProtKB:Q86TB9				663709204	0	4.86136e-05	98.59	2.9975e-08	2	1046.07
EVEETDEMDQVELVDFDPNQER	UniProtKB:P31689				6.32688e+08	0	7.51717e-06	98.59	8.21216e-08	2	1333.58
DPNTYFIVGTAMVYPEEAEPK	UniProtKB:Q16531				392664440	0	4.86136e-05	98.56	7.46314e-08	2	1186.07
VADNLAIQLAAVTEDKYEILQSVDDAAIVIK	UniProtKB:Q12906				2013063356	0	7.48231e-06	98.43	2.07715e-08	3	1110.28
EADIDGDGQVNYEEFVQmMTAK	UniProtKB:P62158	M18(Oxidation)			214788227	0	2.16316e-05	98.4	8.3691e-08	2	1253.55
EEPAAAGSGAASPSAAEK	UniProtKB:P29966				1952486784	0	3.68034e-05	98.39	6.03051e-08	2	800.878
HSLPSGLGLSETQITSHGFDNTK	UniProtKB:P53367				1145190356	0	1.07914e-07	98.36	6.6252e-08	3	809.404
EALEALVPVTIEVEVPFDLHR	UniProtKB:Q00341				1008774100	0	4.86136e-05	98.34	2.75889e-08	3	792.767
TIEDLDENQLKDEFFK	UniProtKB:Q9H993				1880054112	0	4.86136e-05	98.32	6.68724e-08	2	992.483
DFPEYTFAIADEEDYAGEVK	UniProtKB:P13667				1639013902	0	4.86136e-05	98.29	8.29543e-08	2	1155.01
TVGTPIASVPGSTNTGTVPGSEK	UniProtKB:Q99460				3392058776	0	4.86136e-05	98.27	4.91266e-08	2	1079.06
AIHTAPVATMAFDPTSTLLATGGcDGAVR	UniProtKB:Q12788	C24(Carbamidomethyl)			518561116	0	4.86136e-05	98.19	7.26895e-08	3	967.814
GAYGGGYGGYDDYNGYNDGYGFGSDRFGR	UniProtKB:P31943				2527605474	0	1.3209e-05	98.18	8.47173e-08	3	1026.42
SGTLAcTGSLVNNTANDR	UniProtKB:CON_P15636	C6(Carbamidomethyl)			3876320032	0	4.86136e-05	98.17	7.15924e-08	2	925.938
LDYFLLSHSLLPALcDSK	UniProtKB:P27695	C15(Carbamidomethyl)			7044429736	0	1.39368e-05	98.16	5.05166e-08	2	1046.54
HGGLSLVQTTDYIYPIVDDPYMMGR	UniProtKB:P49903				383120586	0	2.62228e-07	98.16	8.59791e-08	2	1421.18
DDIDLDALAAEIEGAGAAK	UniProtKB:O60841				3.21762e+08	0	2.36516e-05	98.13	6.57407e-08	2	929.458
SDDELLDDFFHDQSTATSQAGTLSSIPTALTR	UniProtKB:Q7Z6Z7				1730679492	0	9.63026e-06	98.12	9.43598e-08	3	1147.21
TFIFSDLDYMGMSSGFYK	UniProtKB:P23381				590554966	0	4.86136e-05	98.05	7.82984e-08	2	1054.97
NGMTLLMMGSADALPEEPSAK	UniProtKB:P54578				572325776	0	4.86136e-05	98.05	8.13457e-08	2	1082
SYLSGGAGAAGGGGADPGNK	UniProtKB:P25490				323459600	0	1.88616e-05	98	6.75878e-08	2	832.388
LREQTLSPTITSGLHNIAR	UniProtKB:O94979				3.07368e+09	0	9.74638e-06	98	2.4027e-08	3	703.06
SPAGLQVLNDYLADK	UniProtKB:P24534				33536314936	0	4.86136e-05	97.98	4.64607e-08	2	802.425
VAEEHAPSIVFIDEIDAIGTK	UniProtKB:P62191				1787180248	0	4.50947e-06	97.96	5.56486e-08	2	1127.58
YADLLQANPLDTGAMGDVVIFK	UniProtKB:Q9UK61				137003574	0	4.86136e-05	97.96	5.39451e-08	2	1176.11
GFPVAHSIYGIPSVINSANYVYFLGLEK	UniProtKB:O95749				204922265	0	4.86136e-05	97.96	3.96131e-08	3	1019.21
EQNSALPTSSQDEELMEVVEK	UniProtKB:Q9UQ35				1201062652	0	4.86136e-05	97.92	8.8596e-08	2	1182.05
LYGSAGPPPTGEEDTAEK	UniProtKB:P11021				404502240	0	3.91407e-05	97.9	7.52196e-08	2	909.924
EQLEAAKPEPVIEEVDLANLAPR	UniProtKB:Q8WUD4				2241035078	0	1.73314e-06	97.89	3.89644e-08	2	1266.18
TQVEASEESALNHLQNPGDAAEGR	UniProtKB:Q9Y605				1836292164	0	2.90848e-05	97.88	9.13872e-08	3	841.733
TEIKEEEDQPSTSATQSSPAPGQSK	UniProtKB:Q09472				376701585	0	4.86136e-05	97.85	9.36777e-08	3	878.085
DYADFVNLSTNLVGMDK	UniProtKB:Q14746				245605125	0	4.86136e-05	97.83	7.49914e-08	2	951.455
LLPcLHSAcSAcLGPAAPAAANSSGDGGAAGDGTVVDcPVcK	UniProtKB:Q13263	C4(Carbamidomethyl); C9(Carbamidomethyl); C12(Carbamidomethyl); C38(Carbamidomethyl); C41(Carbamidomethyl)			5896509268	0	8.00982e-09	97.82	1.10781e-07	3	1371.29
EDLQPVQIQSLETLGVLAR	UniProtKB:Q8TEX9				2407072288	0	4.86136e-05	97.8	2.50515e-08	2	1055.08
KISIPVDISDSDMMLNIINSSITTK	UniProtKB:P49368				1715270712	0	1.43704e-08	97.79	4.84303e-08	2	1368.22
SFANTLVDVcAYAGSGNVLK	UniProtKB:Q13200	C10(Carbamidomethyl)			1430835971	0	3.92695e-05	97.77	6.98432e-08	2	1043.52
YTPVQQGPVGVNVTYGGDPIPK	UniProtKB:P21333				1609971550	0	7.07299e-06	97.76	5.30119e-08	2	1143.6
IWDMTPVVGcSLATGFSPH	UniProtKB:Q8IWB7	C10(Carbamidomethyl)			219360584	0	4.81851e-05	97.75	8.11618e-08	2	1037.99
TLLDQHGQYPIWMNQR	UniProtKB:Q9BRT6				712567560	0	4.86136e-05	97.74	7.1379e-08	2	1000.5
ILGSGISSSSVLHGMVFK	UniProtKB:P50990				20190719596	0	3.12484e-05	97.73	3.60248e-08	2	909.996
GLAFIQDPDGYWIEILNPNK	UniProtKB:Q04760				22091440588	0	4.86136e-05	97.72	6.16757e-08	2	1152.09
SLGGDVASDGDFLIFEGNR	UniProtKB:O00267				1264279360	0	4.86136e-05	97.7	8.21356e-08	2	984.963
NTNDANScQIIIPQNQVNRK	UniProtKB:P50395;UniProtKB:P31150	C8(Carbamidomethyl)			3272019794	0	4.86136e-05	97.7	6.86006e-08	2	1164.09
QLLHScTVIATNILLVDEIMR	UniProtKB:P40227;UniProtKB:Q92526	C6(Carbamidomethyl)			465569849	0	4.86136e-05	97.69	3.6673e-08	3	813.774
GLVGAVARPTGGIVDMASSTFQGIQR	UniProtKB:Q709C8				175650092	0	1.15173e-06	97.58	4.09919e-08	3	863.463
SMMQDREDQSILcTGESGAGK	UniProtKB:P35579	C13(Carbamidomethyl)			2544726588	0	1.44478e-06	97.54	9.56136e-08	2	1150.5
EDTGTYTcMVSEEGGNSYGEVK	UniProtKB:Q9Y624	C8(Carbamidomethyl)			0	0	4.16851e-05	97.53	8.50524e-08	2	1207
VVLDVGcGTGILSMFAAK	UniProtKB:O60678	C7(Carbamidomethyl)			807799952	0	3.75449e-05	97.48	4.79851e-08	2	919.49
NNPATPSTAMGSSVPYSTAK	UniProtKB:P35658				190339908	0	4.86136e-05	97.48	8.51529e-08	2	990.974
ESSTESSQSAKPVSGQDTSGNTEGSPAAEK	UniProtKB:Q96S66				2.93789e+08	0	3.68281e-05	97.48	1.18792e-07	3	985.109
DSSESQLASTESDKPTTGR	UniProtKB:Q96B23				1385570647	0	4.86136e-05	97.43	8.94732e-08	2	998.461
EIILVDDYSNDPEDGALLGK	UniProtKB:Q10471				1.75304e+08	0	1.70249e-05	97.43	7.70489e-08	2	1088.54
TEETATEMLTSELQTQAHVIK	UniProtKB:Q02952				0	0	4.86136e-05	97.43	7.71844e-08	3	787.398
GFFDPNTEENLTYLQLMER	UniProtKB:Q15149				357920774	0	4.86136e-05	97.42	9.89716e-08	2	1159.04
NTSSETTMEEELGLVGATADDTEAELIR	UniProtKB:Q15021				3.23561e+08	0	1.49182e-05	97.39	1.09124e-07	3	994.803
NIIQQAIDAGEVPSYNAFVK	UniProtKB:Q8WXX5				1713605846	0	1.4086e-05	97.38	5.50898e-08	2	1089.07
VTSVVFHPSQDLVFSASPDATIR	UniProtKB:Q9UMS4				673237976	0	2.36102e-06	97.37	6.33614e-08	2	1237.14
mLLADQGQSWKEEVVTVETWQEGSLK	UniProtKB:P09211	M1(Oxidation)			2024448599	0	4.72216e-05	97.37	8.52576e-08	3	1003.17
AKVDEFPLcGHmVSDEYEQLSSEALEAAR	UniProtKB:P27635	C9(Carbamidomethyl); M12(Oxidation)			712543676	0	1.06761e-06	97.36	1.18916e-07	3	1099.85
SPPYTAFLGNLPYDVTEESIK	UniProtKB:P23588				4811472704	0	3.5143e-06	97.35	8.14634e-08	2	1171.08
YQGDGIVEDEEETMENNEEK	UniProtKB:Q9NYF8				1425457312	0	5.70331e-06	97.32	8.4104e-08	2	1179.48
LLIHQSLAGGIIGVK	UniProtKB:P61978				56545396176	0	4.86136e-05	97.31	3.66916e-09	2	759.977
GSQGGGGGGSSSSSVVSSGGDEGYGTGGGGSSATSGGR	UniProtKB:Q6ZN18				4.15866e+07	0	4.79763e-06	97.3	1.15924e-07	3	1036.77
TFFPEYTHQLFGDDETAFGYK	UniProtKB:O14929				2286048504	0	1.98072e-05	97.27	1.09668e-07	2	1257.07
ASATSVSSAGEQAAGDPEGR	UniProtKB:Q9BZ23				349798960	0	4.86136e-05	97.26	8.91454e-08	2	924.427
LLSDLcGTVMSTTDVEK	UniProtKB:Q53EL6	C6(Carbamidomethyl)			1634429478	0	4.86136e-05	97.23	8.23264e-08	2	934.954
APKPDGPGGGPGGSHMGGNYGDDR	UniProtKB:P35637				6.33465e+10	0	4.86136e-05	97.23	9.80896e-08	2	1126.99
INVDIPEEANQNLSFGATER	UniProtKB:Q9H9A6				648326672	0	3.42299e-05	97.22	8.80925e-08	2	1109.05
ScTQSATAPQQEADAEVNTETLNK	UniProtKB:Q9ULU4	C2(Carbamidomethyl)			354782420	0	4.86136e-05	97.2	1.13565e-07	2	1297.09
EVMQEVAQLSQFDEELYK	UniProtKB:P49591				1883973341	0	4.86136e-05	97.18	9.89575e-08	2	1093.52
LEDIANAALAASAVTQVAK	UniProtKB:Q8WVM8				642437044	0	4.86136e-05	97.17	3.47855e-08	2	928.512
VTHETSAHEGQTEAPSIDEK	UniProtKB:P15374				10559577830	0	4.82157e-07	97.17	9.91184e-08	2	1083.51
VNNVVWDLDRPLEEDcTLELLK	UniProtKB:P26639	C16(Carbamidomethyl)			2308713832	0	4.86136e-05	97.13	7.5627e-08	2	1335.68
TPIGSFLGSLSLLPATK	UniProtKB:P24752				6759217852	0	2.66002e-05	97.11	1.86852e-08	2	851.495
GASLEEVNDEGYTPLMEAAR	UniProtKB:O75179				380424448	0	4.86136e-05	97.07	1.0126e-07	2	1076.5
LSEDSAATLLSINSDTPYMK	UniProtKB:Q9NXC5				91858424	0	4.86136e-05	97.07	9.21896e-08	2	1078.53
VIMGEEVEPVGLMTGSGVVGVK	UniProtKB:P27708				1643295864	0	4.86136e-05	97.05	4.18252e-08	2	1094.09
LNIISNLDcVNEVIGIR	UniProtKB:P30153;UniProtKB:P30154	C9(Carbamidomethyl)			9899657252	0	4.86136e-05	97.04	4.47685e-08	2	971.525
LIEVANLAcSISNNEEGVK	UniProtKB:P35221	C9(Carbamidomethyl)			829331102	0	4.86136e-05	97.02	7.68619e-08	2	1030.52
VEESTQVGGDPFPAVFGDFLGR	UniProtKB:Q14315				127810862	0	8.80577e-06	97.01	1.01972e-07	2	1162.56
TLALLAFDSPEESPFGDLLHTMQR	UniProtKB:Q9NWU2				816531091	0	1.7262e-07	97.01	8.59175e-08	2	1344.67
VLTEDEMGHPEIGDAIAR	UniProtKB:P14324				6516566028	0	8.68839e-06	97	8.96471e-08	2	976.974
HTGPNSPDTANDGFVR	UniProtKB:P31943;UniProtKB:P55795				53295136088	0	4.86136e-05	96.98	8.67535e-08	2	842.889
FADDTYTESYISTIGVDFK	UniProtKB:P62820;UniProtKB:Q9H0U4				1374939888	0	4.86136e-05	96.96	1.06224e-07	2	1086.5
NAALFALGQFSENLQPHISSYSR	UniProtKB:Q8TEX9				911740680	0	2.18661e-06	96.96	8.55631e-08	3	850.763
VFSWLQQEGHLSEEEMAR	UniProtKB:P22102				698273600	0	2.49756e-05	96.95	1.04017e-07	2	1088.51
HLASDAIINENYDYLK	UniProtKB:P52948				346238032	0	4.03929e-06	96.9	8.5018e-08	2	939.968
GPcVSENELGVGGTSQWK	UniProtKB:Q15437	C3(Carbamidomethyl)			244543197	0	4.86136e-05	96.89	9.826e-08	2	952.949
ILQEYVEHQVDDAMMANAAQK	UniProtKB:P08243				2599756960	0	4.55494e-05	96.89	1.12421e-07	3	802.05
EALKDEYDDLSDLTAAQQETLSDWESQFTFK	UniProtKB:O00264				2105853268	0	9.87308e-06	96.87	1.33592e-07	3	1208.56
GVDDLDFFIGDEAIEKPTYATK	UniProtKB:P61158				2011254310	0	4.86136e-05	96.86	9.75708e-08	2	1222.6
LITSVADVVNNDPmVGSK	UniProtKB:P06737	M14(Oxidation)			392933515	0	4.86136e-05	96.84	7.04262e-08	2	937.984
DLADELALVDVIEDK	UniProtKB:P00338				1670520144	0	4.86136e-05	96.76	6.94055e-08	2	829.43
VGNLTVVGKEPESILQVLSQMEK	UniProtKB:P17174				4195839492	0	2.24455e-06	96.75	2.87435e-08	2	1249.69
VLSEDEEDVDFDIIHNANDTFTVK	UniProtKB:O75369				3298340592	0	1.16947e-06	96.74	1.269e-07	2	1383.15
INNVPAEGENEVNNELANR	UniProtKB:Q9NUQ9				983493110	0	4.86136e-05	96.72	1.00182e-07	2	1048.51
FMcNLDcQEEPDScISEK	UniProtKB:P06280	C3(Carbamidomethyl); C7(Carbamidomethyl); C14(Carbamidomethyl)			1357879062	0	4.86136e-05	96.72	7.93902e-08	2	1131.45
DLLDAELTAMAGESYSR	UniProtKB:P42345				7.65252e+07	0	4.86136e-05	96.71	9.81841e-08	2	921.435
EGNDLYHEMIESGVINLK	UniProtKB:P06576				2198209776	0	4.86136e-05	96.71	9.55391e-08	2	1031.01
FDLGQDVIDFTGHALALYR	UniProtKB:P50395;UniProtKB:P31150				3865741213	0	1.76374e-05	96.66	7.78514e-08	3	717.703
ENGTVTAANASTLNDGAAALVLMTADAAK	UniProtKB:P24752				188133037	0	4.86136e-05	96.65	9.18939e-08	3	921.133
SHLVHGSSPGVMGTSVATSASK	UniProtKB:P35658				594210027	0	4.57697e-05	96.64	8.87783e-08	3	699.687
FEIGEGENLDLPYGLER	UniProtKB:Q02790				7062336528	0	4.86136e-05	96.61	9.75353e-08	2	975.975
cIAVGESDGSIWNPDGIDPK	UniProtKB:P49448;UniProtKB:P00367	C1(Carbamidomethyl)			507172272	0	4.86136e-05	96.61	1.11919e-07	2	1065.49
LVGSQEELASWGHEYVR	UniProtKB:Q13200				5819507048	0	2.62546e-05	96.6	9.75195e-08	2	980.482
STLINSLFLTDLYSPEYPGPSHR	UniProtKB:Q16181				2944742413	0	1.44027e-05	96.6	8.86153e-08	2	1304.16
VDTTLSDSYNYSGTENLK	UniProtKB:Q7Z3T8				141381272	0	4.86136e-05	96.57	1.09552e-07	2	1003.96
VVGFHVLGPNAGEVTQGFAAALK	UniProtKB:Q16881				7781448090	0	4.86136e-05	96.52	4.22846e-08	3	761.418
sGEDEQQEQTIAEDLVVTK	UniProtKB:Q9UQ80	N-Term(Acetyl)			4168645044	0	4.86136e-05	96.51	1.12963e-07	2	1081.01
mDEMATTQISKDELDELK	UniProtKB:P13797	N-Term(Acetyl); M1(Oxidation)			1134838852	0	4.86136e-05	96.46	1.15389e-07	2	1077.99
LLAQLLGTSEEDSMVGTLYDK	UniProtKB:Q9HB07				3958010464	0	4.86136e-05	96.42	8.43156e-08	2	1142.08
mDELQDVQLTEIKPLLNDK	UniProtKB:Q9UGV2	N-Term(Acetyl)			1879898260	0	1.89801e-05	96.42	7.4761e-08	2	1142.59
EEQSGHSGEEVQLcSK	UniProtKB:Q8IXW5	C14(Carbamidomethyl)			668873772	0	4.86136e-05	96.37	1.01047e-07	2	902.399
IEDVPAPSTSADKVESLDVDSEAK	UniProtKB:P49321				1538760004	0	2.52066e-05	96.34	1.14674e-07	3	834.743
EVMQATATSGFASGMEDK	UniProtKB:Q9BTA9				54401832	0	4.86136e-05	96.33	1.05835e-07	2	930.412
AIVHAVGQELQVTGPFNLQLIAK	UniProtKB:P27708				3172010580	0	4.86136e-05	96.32	2.22612e-08	3	816.132
IGcLLSGGLDSSLVAATLLK	UniProtKB:P08243	C3(Carbamidomethyl)			2582530379	0	4.86136e-05	96.31	2.92355e-08	2	994.561
aAAAAGLGGGGAGPGPEAGDFLAR	UniProtKB:P23610	N-Term(Acetyl)			401774033	0	2.19556e-05	96.31	9.44539e-08	2	1027.01
SAEEAASVLATSISPEQcIK	UniProtKB:O75122	C18(Carbamidomethyl)			465736599	0	4.86136e-05	96.31	9.77517e-08	2	1046.02
APGSLVISAYAVcPDITATVTPDLK	UniProtKB:O15067	C13(Carbamidomethyl)			899720824	0	3.59636e-05	96.26	5.49012e-08	2	1280.18
VFGALGPIGPSSPGLTLGGLAVSEHR	UniProtKB:Q86YD1				584283296	0	1.64122e-05	96.23	3.03031e-08	3	830.464
LFTDGDAALEFADFYDFR	UniProtKB:Q969S3				230220852	0	4.79257e-05	96.21	1.19642e-07	2	1056.98
VLPLEALVTDAGEVTEAGK	UniProtKB:Q92616				2090182838	0	8.69662e-06	96.16	4.85658e-08	2	956.522
HGGVcAPAAVATSPPGAIPK	UniProtKB:Q9Y6A5	C5(Carbamidomethyl)			2751186162	0	4.86136e-05	96.11	7.61169e-08	2	929.487
IAQPGDHVSVTGIFLPILR	UniProtKB:P33993				13712748206	0	4.86136e-05	96.06	2.40186e-08	2	1017.08
ATNIEVLSNTFQFTNEAR	UniProtKB:O75534				1429369564	0	4.86136e-05	96.05	9.96854e-08	2	1028.01
FYcDYcDTYLTHDSPSVR	UniProtKB:P09234	C3(Carbamidomethyl); C6(Carbamidomethyl)			5166731092	0	9.61268e-06	96.05	1.1518e-07	2	1149.97
DNAAVDGISLHLQDIcPLLYSTDDAIcSK	UniProtKB:O75694	C16(Carbamidomethyl); C27(Carbamidomethyl)			1151941072	0	4.54483e-06	96.03	1.48067e-07	3	1068.84
RFQSVPAQPGQTSPLLQYFGILLDQGQLNK	UniProtKB:Q00610				3.31699e+09	0	1.6958e-05	96.03	4.46158e-08	3	1115.27
ISGETIFVTAPHEATAGIIGVNR	UniProtKB:Q00610				4176455888	0	2.64799e-06	96.01	5.26534e-08	2	1177.13
YSNDPVVASLAQDIFK	UniProtKB:Q96P70				6047787848	0	4.86136e-05	95.98	8.29216e-08	2	883.957
YAPTEAQLNAVDALIDSmSLAK	UniProtKB:P13010	M18(Oxidation)			581310216	0	1.99207e-05	95.96	9.94784e-08	2	1169.09
NQVLPLSDVDTTSATDIQR	UniProtKB:Q9NYY8				239184545	0	4.86136e-05	95.92	9.09705e-08	2	1037.03
SVQNDSQAIAEVLNQLK	UniProtKB:P15924				776388226	0	4.86136e-05	95.9	6.73187e-08	2	928.997
LPAGAEPYEFVSLEWLQK	UniProtKB:Q86UV5				619782241	0	2.23276e-05	95.86	8.67234e-08	2	1039.04
HSVESMITTLDPGMAPYIK	UniProtKB:Q96M27				676041985	0	5.81407e-07	95.86	1.10058e-07	2	1045.52
VTVNTNMVDLNDYLQHILK	UniProtKB:P53618				2911356736	0	4.86136e-05	95.85	7.83428e-08	2	1115.59
VEDMAELTcLNEASVLHNLK	UniProtKB:P35579;UniProtKB:P35580	C9(Carbamidomethyl)			6031179596	0	4.86136e-05	95.85	1.2486e-07	2	1143.56
RTMMAcGGSIQTSVNALSADVLGR	UniProtKB:Q99832	C6(Carbamidomethyl)			589136720	0	4.86136e-05	95.85	1.18229e-07	3	832.414
ILQQIEEPLALASGALPDWcEQLTSK	UniProtKB:Q9ULT8	C20(Carbamidomethyl)			319458651	0	2.73122e-05	95.82	7.85848e-08	3	970.841
NGGLGHMNIALLSDLTK	UniProtKB:P30048				2008504832	0	4.86136e-05	95.8	6.44679e-08	2	877.471
DLIHDQDEDEEEEEGQR	UniProtKB:Q9UNZ2				1985990818	0	2.31034e-05	95.8	1.10511e-07	2	1043.43
SGDAAIVDMVPGKPMcVESFSDYPPLGR	UniProtKB:P68104;UniProtKB:Q5VTE0	C16(Carbamidomethyl)			74949593058	0	1.70726e-07	95.8	1.50057e-07	2	1498.21
ATTPADGEEPAPEAEALAAAR	UniProtKB:Q96S44				1028215808	0	4.86136e-05	95.77	1.23221e-07	2	1019.49
TEDNQSSEMQLTIDSLK	UniProtKB:Q9Y6X4				217142120	0	4.86136e-05	95.74	1.27156e-07	2	969.961
IVQQIAILMGcAILPHLR	UniProtKB:O75533	C11(Carbamidomethyl)			3018479812	0	2.30446e-05	95.73	2.00876e-08	3	682.731
RGTGGVDTAAVGGVFDVSNADRLGFSEVELVQMVVDGVK	UniProtKB:P12277				6.23706e+08	0	2.13637e-05	95.73	8.52823e-08	4	988.511
SYSmIVNNLLKPISVEGSSK	UniProtKB:Q9HB71	M4(Oxidation)			0	0	8.15557e-06	95.69	8.58825e-08	2	1091.57
HYLDQLNHILGILGSPSQEDLNcIINLK	UniProtKB:P28482	C23(Carbamidomethyl)			3795011872	0	5.21527e-06	95.68	7.6184e-08	4	805.175
AAESVSKPDVSEEAPGPSK	UniProtKB:Q9BY42				1564608116	0	1.81655e-05	95.67	1.13598e-07	2	942.967
HINMDGTINVDDFK	UniProtKB:O75643				1257865856	0	4.86136e-05	95.65	1.13972e-07	2	809.882
MLDAEDIVNTARPDEK	UniProtKB:O43707				2305898752	0	4.86136e-05	95.63	1.22184e-07	2	908.941
NLDQEQLSQVLDAMFER	UniProtKB:P13861				3476823364	0	4.86136e-05	95.63	1.27956e-07	2	1018.49
SPAGPAATPAQAQAASTPR	UniProtKB:Q13428				6.73915e+08	0	4.86136e-05	95.6	9.6095e-08	2	875.451
NLGIESQDVMQQATNAILR	UniProtKB:Q7L014				385646232	0	4.86136e-05	95.6	9.95929e-08	2	1051.04
LAGDMGELALEGAEGQVEGSAPDK	UniProtKB:Q9Y2B9				104330084	0	3.18792e-05	95.59	1.47097e-07	3	782.043
MRPGAYSTGYGGYEEYSGLSDGYGFTTDLFGR	UniProtKB:P52597				949512396	0	4.47522e-07	95.59	1.92274e-07	3	1158.85
AAAQLLQSQAQQSGAQQTK	UniProtKB:Q9NVA2				1553095556	0	4.86136e-05	95.55	8.6913e-08	2	979.01
GQIQEAIALINSLHPELLDTNR	UniProtKB:Q9NWU2				2493132023	0	5.69092e-07	95.54	5.56275e-08	2	1223.16
SVVPGGGAVEAALSIYLENYATSmGSR	UniProtKB:P17987	M24(Oxidation)			716412231	0	3.09538e-06	95.53	1.25744e-07	2	1358.18
ELGGLEGDPSPEEDEGIQK	UniProtKB:Q9BT09				562176346	0	4.86136e-05	95.52	1.36569e-07	2	999.964
AQEAPGQAEPPAAAEVQGAGNENEPR	UniProtKB:O14745				1474921090	0	2.60377e-05	95.51	1.61628e-07	3	863.407
GFAVLEYETAEMAEEAQQQADGLSLGGSHLR	UniProtKB:Q8IY67				1317651456	0	7.46403e-07	95.5	1.7085e-07	3	1103.19
APDMSSSEEFPSFGAQVAPK	UniProtKB:Q00341				1519082912	0	4.93424e-06	95.49	1.44662e-07	2	1041.47
RcQEAQNGSESEVWTHQSK	UniProtKB:Q9Y2Z0	C2(Carbamidomethyl)			925852589	0	3.46176e-05	95.49	1.56075e-07	3	754.34
ENSTLNcASFTAGIVEAVLTHSGFPAK	UniProtKB:Q8IUR0	C7(Carbamidomethyl)			532129036	0	2.42702e-05	95.49	1.50481e-07	3	941.125
DGIDDESYGQIFKPIISK	UniProtKB:Q92769				2114025440	0	4.86136e-05	95.48	1.04846e-07	2	1013.01
HPVTGQFLYQDSNWASK	UniProtKB:P02786				726702000	0	4.86136e-05	95.46	1.31585e-07	2	989.478
YRcELLYEGPPDDEAAMGIK	UniProtKB:P13639	C3(Carbamidomethyl)			33542094580	0	4.86136e-05	95.46	1.54383e-07	2	1164.04
LLVALGTLISDDSNAVQLAK	UniProtKB:Q9Y263				587340432	0	4.23391e-05	95.45	2.78402e-08	2	1021.08
VLGSILNASTVAAAMcMVVTR	UniProtKB:P10155	C16(Carbamidomethyl)			530432597	0	4.86136e-05	95.44	8.4499e-08	2	1082.57
GPQLFHMDPSGTFVQcDAR	UniProtKB:P28066	C16(Carbamidomethyl)			2292774960	0	3.8299e-05	95.43	1.51071e-07	3	721.665
KLTDNIQcEIFQVLYEEATASYK	UniProtKB:Q9Y3D8	C8(Carbamidomethyl)			157609851	0	4.86136e-05	95.42	1.28884e-07	3	921.797
SLSNATIINEEVLNAMLK	UniProtKB:P61011				3178550236	0	4.86136e-05	95.41	7.18055e-08	2	980.526
GIFPVLcKDPVQEAWAEDVDLR	UniProtKB:P14618	C7(Carbamidomethyl)			2836133892	0	1.04153e-06	95.4	1.15909e-07	2	1279.15
GHSTcLSEGALSPDGTVLATASHDGYVK	UniProtKB:Q6P2E9	C5(Carbamidomethyl)			0	0	3.31688e-06	95.36	1.68662e-07	3	944.116
DGPLNMILDDGGDLTNLIHTK	UniProtKB:P23526				2.03208e+10	0	4.39533e-06	95.35	1.22094e-07	2	1126.57
aAAAEcDVVMAATEPELLDDQEAKR	UniProtKB:Q99615	N-Term(Acetyl); C6(Carbamidomethyl)			532151044	0	4.86136e-05	95.34	1.77131e-07	2	1373.14
LMATQMTAAGLGPGVEQTK	UniProtKB:Q92797				209602664	0	4.86136e-05	95.28	9.62977e-08	2	952.497
QAADmILLDDNFASIVTGVEEGR	UniProtKB:P05023;UniProtKB:P50993;UniProtKB:P13637;UniProtKB:Q13733	M5(Oxidation)			182287776	0	1.17449e-05	95.28	1.50258e-07	2	1240.61
LILPVGPAGGNQMLEQYDK	UniProtKB:P22061				9676833208	0	4.86136e-05	95.2	9.66687e-08	2	1022.03
QVLDLEDLVFTQGSHFMANK	UniProtKB:O75643				3373610872	0	4.86136e-05	95.2	1.2945e-07	2	1146.58
SIWAFGPDATGPNILVDDTLPSEVDK	UniProtKB:Q15029				1607403568	0	1.82626e-07	95.11	1.4047e-07	2	1379.19
cLQILAAGLFLPGSVGITDPcESGNFR	UniProtKB:Q12905	C1(Carbamidomethyl); C21(Carbamidomethyl)			945127008	0	1.28391e-05	95.11	1.26334e-07	2	1446.73
DFVSEQLTSLLVNGVQLPALGENKK	UniProtKB:P54136				797920800	0	1.10948e-05	95.1	4.21516e-08	2	1350.25
DELHIVEAEAMNYEGSPIK	UniProtKB:P06748				2.97937e+10	0	1.80523e-05	95.09	1.53183e-07	2	1073.01
LISGVVQSYVELGLNEDDAFAK	UniProtKB:Q13616				604646844	0	1.98542e-05	95.09	1.11925e-07	2	1184.11
KLGGTIDDcELVEGLVLTQK	UniProtKB:P50991	C9(Carbamidomethyl)			4849419294	0	1.93236e-05	95.02	8.26441e-08	2	1094.58
KPAAGLSAAPVPTAPAAGAPLmDFGNDFVPPAPR	UniProtKB:Q9NQC3	M22(Oxidation)			221582952	0	1.49372e-07	95	9.56431e-08	3	1096.57
LVQTTYEcLMQAIDAVKPGVR	UniProtKB:P53582	C8(Carbamidomethyl)			2666523023	0	1.67294e-05	94.99	9.92867e-08	3	798.084
QQDSQPEEVMDVLEMVENVK	UniProtKB:Q9H307				235786102	0	4.86136e-05	94.96	1.75726e-07	2	1174.05
LSScDSFTSTINELNHcLSLR	UniProtKB:P07814	C4(Carbamidomethyl); C17(Carbamidomethyl)			3006214466	0	3.02006e-05	94.96	1.77067e-07	2	1227.58
RKPVLPALTINPTIAEGPSPTSEGASEANLVDLQK	UniProtKB:P36507				2933642464	0	9.78021e-08	94.94	4.79498e-08	3	1205.33
EDLNGPFLNQLETDPSLDMK	UniProtKB:Q9UQ35				1904046314	0	4.86136e-05	94.9	1.67379e-07	2	1138.55
VFImDScDELIPEYLNFIR	UniProtKB:P08238	M4(Oxidation); C7(Carbamidomethyl)			5672030512	0	4.17436e-05	94.9	1.70809e-07	2	1195.57
VTVVcEPEDYVVVSTEMQSSESK	UniProtKB:P31939	C5(Carbamidomethyl)			1655510810	0	1.26671e-05	94.89	1.9608e-07	2	1301.6
HLVGVDSLIGPETQIGEK	UniProtKB:Q9NR50				523623512	0	1.66376e-05	94.87	6.69432e-08	2	946.516
mDPNcScSPVGScAcAGScK	UniProtKB:P80297	M1(Oxidation); N-Term(Acetyl); C5(Carbamidomethyl); C7(Carbamidomethyl); C13(Carbamidomethyl); C15(Carbamidomethyl); C19(Carbamidomethyl)			0	0	4.86136e-05	94.86	7.3368e-08	2	1131.91
HLALSQPFSFTQQDMPK	UniProtKB:Q9H4L4				196728256	0	8.72465e-06	94.85	1.38171e-07	2	987.991
YDAFGEDSSSAMGVENR	UniProtKB:Q9Y2X3				770092304	0	4.86136e-05	94.8	1.28247e-07	2	917.882
EVGIEFMDLYSHLVPVYDVEPLEK	UniProtKB:Q6P2Q9				2358467368	0	1.1484e-08	94.76	1.45926e-07	2	1411.21
MNAQETATGMAFEEPIDEK	UniProtKB:O43719				869687746	0	4.86136e-05	94.74	1.65787e-07	2	1056.47
VAIQLNDTHPALSIPELMR	UniProtKB:P11216				1006178710	0	5.09486e-06	94.72	6.87054e-08	2	1059.58
DLKPENLLIDQQGYIQVTDFGFAK	UniProtKB:P17612				60974713	0	4.86136e-05	94.69	8.9763e-08	3	918.153
ILAIGLINEALDEGDAQK	UniProtKB:P46940				4100951056	0	4.86136e-05	94.64	7.40196e-08	2	942.011
ERASFITPVPGGVGPMTVAMLMQSTVESAK	UniProtKB:P11586				4.36597e+09	0	2.64148e-05	94.57	1.48175e-07	3	1031.19
NLVLTGFSHIDLIDLDTIDVSNLNR	UniProtKB:Q9UBT2				96629414	0	4.13768e-06	94.54	7.90659e-08	3	933.167
TAMSTPHVAEPAENEQDEQDENGAEASADLR	UniProtKB:P26038				1728887903	0	5.47011e-06	94.41	2.45329e-07	3	1104.82
FVTHVSDWGALATISTLEAVR	UniProtKB:O75629				923571954	0	1.38623e-07	94.38	9.70975e-08	2	1137.1
GLPQLGTLGAGNHYAEIQVVDEIFNEYAAK	UniProtKB:Q9Y3I0				2938943054	0	4.86136e-05	94.38	1.28703e-07	3	1073.22
LVDQALLTMDTYLGQFPDIK	UniProtKB:O00499				961266416	0	4.86136e-05	94.37	1.19275e-07	2	1141.09
ADFTVVAGDEGSSTTGGSSEENK	UniProtKB:P49916				159041477	0	9.51268e-06	94.34	1.96231e-07	2	1122.99
AITTGLQEYVEAVSFQHFIK	UniProtKB:Q99598				1071832223	0	4.86136e-05	94.34	1.095e-07	3	761.068
VINAAHSFYNGTTTLPISDEDRTPR	UniProtKB:P49915				4563234160	0	4.86136e-05	94.33	1.65025e-07	4	694.6
ILTSVDQYLELIGNSLPGTTAK	UniProtKB:Q96TA1				529250100	0	9.2836e-06	94.32	5.95423e-08	2	1167.14
RNFILDQTNVSAAAQR	UniProtKB:Q00839				9674063344	0	1.1796e-05	94.28	1.03334e-07	2	902.479
AASAAGAAGSAGGSSGAAGAAGGGAGAGTRPGDGGTASAGAAGPGAATK	UniProtKB:Q9UKY7				6743280778	0	1.43831e-05	94.21	2.2721e-07	4	918.189
HAQGGTWYGVDINNEDIADNFEAFVWEPAMVR	UniProtKB:Q99832				469566311	0	1.71082e-05	94.2	2.4775e-07	3	1217.9
EIVNSEEcIINEITGEESVK	UniProtKB:O95391	C8(Carbamidomethyl)			243614470	0	3.22869e-05	94.19	2.01222e-07	2	1146.55
FRAPLLYEQYIGQYLTQEELSAR	UniProtKB:Q96F63				1007359404	0	2.78141e-05	94.19	1.24494e-07	3	930.15
LLDLSSNQLIDENQLYLIAHLPR	UniProtKB:Q15813				1176877441	0	3.05863e-05	94.18	4.32361e-08	3	893.5
KLGVNNISGIEEVNmFTNQGTVIHFNNPK	UniProtKB:P20290	M15(Oxidation)			622222312	0	4.86136e-05	94.16	1.1799e-07	4	808.422
LFFHcSQYNGNLQDLK	UniProtKB:O75534	C5(Carbamidomethyl)			7723851270	0	4.86136e-05	94.09	1.84267e-07	2	992.476
FQYcVAVGAQTFPSVSAPSK	UniProtKB:P55265	C4(Carbamidomethyl)			554940372	0	2.30301e-05	94.06	1.64302e-07	2	1072.54
NLSPYVSNELLEEAFSQFGPIER	UniProtKB:P23246				559630646	0	4.86136e-05	94.06	1.69505e-07	2	1320.16
AMDPQDLQNTEVPIATTAK	UniProtKB:Q9H2M9				694298688	0	4.86136e-05	94.05	1.6718e-07	2	1022.01
NVLLSAGcDNVVLIWNVGTAEELYR	UniProtKB:Q9BR76	C8(Carbamidomethyl)			2.91672e+08	0	4.86136e-05	94.04	1.39263e-07	3	935.817
TVPPAVTGITFLSGGQSEEEASINLNAINK	UniProtKB:P04075				5146025491	0	4.86136e-05	94.03	1.13549e-07	3	1019.87
SFNYSPNSSTSEVSSTSASK	UniProtKB:Q5VT52				5.30294e+07	0	4.86136e-05	94.02	1.94533e-07	2	1033.96
SVVPGGGAVEAALSIYLENYATSMGSR	UniProtKB:P17987				304111295	0	4.86136e-05	94.02	1.68141e-07	3	900.454
LSAEENPDDSEVPSSSGINSTK	UniProtKB:Q9Y5Q9				686699368	0	4.86136e-05	93.99	2.20661e-07	2	1132.02
SQLQDLVEFPYVNLHNEVVGIIESR	UniProtKB:Q12769				1080573664	0	9.09474e-06	93.98	1.22003e-07	3	966.839
NATNVEQAFMTMAAEIK	UniProtKB:Q9H0U4;UniProtKB:Q92928				1465525828	0	4.86136e-05	93.97	1.73415e-07	2	934.954
NLIMSGYSPEHDVSGISDPFLQVR	UniProtKB:O43747				551323792	0	1.47385e-06	93.97	1.92777e-07	2	1331.16
AAEAAPPTQEAQGETEPTEQAPDALEQAADTSR	UniProtKB:Q8N163				0	0	6.14685e-06	93.96	2.81093e-07	3	1127.51
HLLQAPVDDAQEILHSR	UniProtKB:Q15436				3555257904	0	1.31306e-06	93.93	1.0962e-07	3	648.013
TMLELLNQLDGFQPNTQVK	UniProtKB:P17980				1589900832	0	4.86136e-05	93.92	1.28546e-07	2	1095.07
FLYGcQAPTIcFVYQDPQGR	UniProtKB:Q16531	C5(Carbamidomethyl); C11(Carbamidomethyl)			1404208784	0	2.50217e-05	93.89	2.346e-07	2	1210.57
YVASYLLAALGGNSSPSAK	UniProtKB:P05387				31676832568	0	4.86136e-05	93.88	1.15739e-07	2	934.993
LGAGYGLLSEAELEVVPIIAK	UniProtKB:Q15642				712553124	0	4.86136e-05	93.88	4.2072e-08	2	1071.61
[truncated: 34,946 more rows]

## Sheet: 2D short Total Unique Proteins
Mascot Score ≥ 20
Accession	Description	Score	Coverage	# Proteins	# Unique Peptides	# Peptides	# PSMs	Area	MW [kDa]
UniProtKB:P63261	Actin, cytoplasmic 2 OS=Homo sapiens GN=ACTG1 PE=1 SV=1	27196.5	77.07	1	1	24	1058	4.4973e+11	41.7658
UniProtKB:CON_P60712	(Bos taurus) Actin, cytoplasmic 1	21733.6	77.07	1	1	24	888	4.4973e+11	41.7097
UniProtKB:P68363	Tubulin alpha-1B chain OS=Homo sapiens GN=TUBA1B PE=1 SV=1	12686.1	72.28	1	0	28	534	267768269008	50.1196
Ensembl:CON_ENSBTAP00000016242	(Bos taurus) similar to alpha-tubulin I isoform 1	12540.3	70.51	1	0	26	518	267768269008	50.1476
UniProtKB:Q9BQE3	Tubulin alpha-1C chain OS=Homo sapiens GN=TUBA1C PE=1 SV=1	11730	72.16	1	3	28	516	267768269008	49.8635
UniProtKB:Q71U36	Tubulin alpha-1A chain OS=Homo sapiens GN=TUBA1A PE=1 SV=1	11705.5	72.28	1	0	29	512	267768269008	50.1036
UniProtKB:P07900	Heat shock protein HSP 90-alpha OS=Homo sapiens GN=HSP90AA1 PE=1 SV=5	11011.7	66.53	1	30	52	449	206793090776	84.6067
UniProtKB:P07437	Tubulin beta chain OS=Homo sapiens GN=TUBB PE=1 SV=2	9114.26	82.43	1	4	29	311	2.34884e+11	49.639
UniProtKB:P52272	Heterogeneous nuclear ribonucleoprotein M OS=Homo sapiens GN=HNRNPM PE=1 SV=3	8865.51	71.78	1	48	48	271	44217825040	77.4643
UniProtKB:P35579	Myosin-9 OS=Homo sapiens GN=MYH9 PE=1 SV=4	8674.16	55.97	1	90	110	235	13163022748	226.392
UniProtKB:Q14204	Cytoplasmic dynein 1 heavy chain 1 OS=Homo sapiens GN=DYNC1H1 PE=1 SV=5	8506.6	44.81	1	164	164	268	6.89784e+09	532.072
UniProtKB:P08238	Heat shock protein HSP 90-beta OS=Homo sapiens GN=HSP90AB1 PE=1 SV=4	8491.69	57.6	1	15	44	384	210372046548	83.2121
UniProtKB:P49327	Fatty acid synthase OS=Homo sapiens GN=FASN PE=1 SV=3	8419.1	55.12	1	102	102	245	3.05652e+10	273.254
UniProtKB:P13639	Elongation factor 2 OS=Homo sapiens GN=EEF2 PE=1 SV=4	8281.09	65.5	1	55	56	274	7.80235e+10	95.277
UniProtKB:Q13748	Tubulin alpha-3C/D chain OS=Homo sapiens GN=TUBA3C PE=1 SV=3	8176.87	51.11	1	0	21	281	2.27424e+11	49.9276
UniProtKB:P62807	Histone H2B type 1-C/E/F/G/I OS=Homo sapiens GN=HIST1H2BC PE=1 SV=4	8142.24	43.65	1	0	6	363	3.3656e+11	13.8976
UniProtKB:P58876	Histone H2B type 1-D OS=Homo sapiens GN=HIST1H2BD PE=1 SV=2	8142.24	43.65	1	0	6	363	3.3656e+11	13.9276
UniProtKB:Q93079	Histone H2B type 1-H OS=Homo sapiens GN=HIST1H2BH PE=1 SV=3	8142.24	43.65	1	0	6	363	3.3656e+11	13.8835
UniProtKB:O60814	Histone H2B type 1-K OS=Homo sapiens GN=HIST1H2BK PE=1 SV=3	8142.24	43.65	1	0	6	363	3.3656e+11	13.8816
UniProtKB:Q99880	Histone H2B type 1-L OS=Homo sapiens GN=HIST1H2BL PE=1 SV=3	8142.24	43.65	1	0	6	363	3.3656e+11	13.9436
UniProtKB:Q99879	Histone H2B type 1-M OS=Homo sapiens GN=HIST1H2BM PE=1 SV=3	8142.24	43.65	1	0	6	363	3.3656e+11	13.9806
UniProtKB:Q99877	Histone H2B type 1-N OS=Homo sapiens GN=HIST1H2BN PE=1 SV=3	8142.24	43.65	1	0	6	363	3.3656e+11	13.9136
UniProtKB:Q5QNW6	Histone H2B type 2-F OS=Homo sapiens GN=HIST2H2BF PE=1 SV=3	8142.24	43.65	1	0	6	363	3.3656e+11	13.9116
UniProtKB:P57053	Histone H2B type F-S OS=Homo sapiens GN=H2BFS PE=1 SV=2	8142.24	43.65	1	0	6	363	3.3656e+11	13.9356
UniProtKB:P06733	Alpha-enolase OS=Homo sapiens GN=ENO1 PE=1 SV=2	7801.57	68.89	1	21	25	233	1.13153e+11	47.1393
UniProtKB:P33778	Histone H2B type 1-B OS=Homo sapiens GN=HIST1H2BB PE=1 SV=2	7790.47	43.65	1	0	6	342	3.27159e+11	13.9416
UniProtKB:P06899	Histone H2B type 1-J OS=Homo sapiens GN=HIST1H2BJ PE=1 SV=3	7790.47	43.65	1	0	6	342	3.27159e+11	13.8956
UniProtKB:P23527	Histone H2B type 1-O OS=Homo sapiens GN=HIST1H2BO PE=1 SV=3	7790.47	43.65	1	0	6	342	3.27159e+11	13.8976
UniProtKB:Q16778	Histone H2B type 2-E OS=Homo sapiens GN=HIST2H2BE PE=1 SV=3	7790.47	43.65	1	0	6	342	3.27159e+11	13.9116
UniProtKB:Q8N257	Histone H2B type 3-B OS=Homo sapiens GN=HIST3H2BB PE=1 SV=3	7790.47	43.65	1	1	6	333	3.27159e+11	13.8995
UniProtKB:P68371	Tubulin beta-2C chain OS=Homo sapiens GN=TUBB2C PE=1 SV=1	7515.09	77.98	1	1	27	282	234407430384	49.799
UniProtKB:P11142	Heat shock cognate 71 kDa protein OS=Homo sapiens GN=HSPA8 PE=1 SV=1	7460.22	66.1	1	22	35	306	1.19934e+11	70.8542
UniProtKB:Q6S8J3	POTE ankyrin domain family member E OS=Homo sapiens GN=POTEE PE=1 SV=3	7419.64	7.91	1	0	7	257	2.93845e+11	121.286
UniProtKB:Q00610	Clathrin heavy chain 1 OS=Homo sapiens GN=CLTC PE=1 SV=5	7419.43	62.03	1	70	90	210	2.8546e+10	191.493
UniProtKB:Q6PEY2	Tubulin alpha-3E chain OS=Homo sapiens GN=TUBA3E PE=1 SV=2	7375.67	39.11	1	0	14	252	2.27424e+11	49.8266
UniProtKB:P62258	14-3-3 protein epsilon OS=Homo sapiens GN=YWHAE PE=1 SV=1	7166.94	73.33	1	19	22	260	1.1658e+11	29.1554
UniProtKB:P10809	60 kDa heat shock protein, mitochondrial OS=Homo sapiens GN=HSPD1 PE=1 SV=2	6986.7	70.68	1	37	37	157	3.98328e+10	61.0164
UniProtKB:P35580	Myosin-10 OS=Homo sapiens GN=MYH10 PE=1 SV=3	6979.3	48.73	1	62	83	161	9.89594e+09	228.858
UniProtKB:P68032	Actin, alpha cardiac muscle 1 OS=Homo sapiens GN=ACTC1 PE=1 SV=1	6690.67	48.01	1	0	15	480	3.41384e+11	41.9919
UniProtKB:Q9BVA1	Tubulin beta-2B chain OS=Homo sapiens GN=TUBB2B PE=1 SV=1	6682.2	79.55	1	1	27	252	2.34884e+11	49.9209
UniProtKB:P07195	L-lactate dehydrogenase B chain OS=Homo sapiens GN=LDHB PE=1 SV=2	6673.48	64.07	1	19	21	209	1.17954e+11	36.6151
UniProtKB:P68133	Actin, alpha skeletal muscle OS=Homo sapiens GN=ACTA1 PE=1 SV=1	6656.86	42.44	1	0	14	479	3.41384e+11	42.0239
UniProtKB:P68366	Tubulin alpha-4A chain OS=Homo sapiens GN=TUBA4A PE=1 SV=1	6643.38	58.93	1	2	23	237	2.09869e+11	49.8924
UniProtKB:P62736	Actin, aortic smooth muscle OS=Homo sapiens GN=ACTA2 PE=1 SV=1	6569.69	45.09	1	0	14	471	3.41384e+11	41.9818
UniProtKB:P63267	Actin, gamma-enteric smooth muscle OS=Homo sapiens GN=ACTG2 PE=1 SV=1	6569.69	45.21	1	0	14	471	3.41384e+11	41.8498
UniProtKB:Q13885	Tubulin beta-2A chain OS=Homo sapiens GN=TUBB2A PE=1 SV=1	6539.42	70.79	1	1	26	250	2.34884e+11	49.875
UniProtKB:P21333	Filamin-A OS=Homo sapiens GN=FLNA PE=1 SV=4	6458.55	51.79	1	91	101	185	9.81044e+09	280.564
UniProtKB:P08107	Heat shock 70 kDa protein 1A/1B OS=Homo sapiens GN=HSPA1A PE=1 SV=5	6433.43	56.01	1	15	29	209	1.23171e+11	70.009
UniProtKB:P04350	Tubulin beta-4 chain OS=Homo sapiens GN=TUBB4 PE=1 SV=2	6187.25	74.77	1	3	24	243	2.27296e+11	49.5539
UniProtKB:CON_P15636	Protease I precursor Lysyl endopeptidase Achromobacter lyticus.	5979.62	26.03	1	13	13	114	1.64685e+11	68.0834
UniProtKB:Q13813	Spectrin alpha chain, brain OS=Homo sapiens GN=SPTAN1 PE=1 SV=3	5860.82	47.13	1	100	100	161	8.01441e+09	284.364
UniProtKB:P78371	T-complex protein 1 subunit beta OS=Homo sapiens GN=CCT2 PE=1 SV=4	5772.75	71.4	1	30	30	133	3.21521e+10	57.4521
UniProtKB:Q6FI13	Histone H2A type 2-A OS=Homo sapiens GN=HIST2H2AA3 PE=1 SV=3	5670.11	55.38	1	0	7	316	448299127696	14.0869
UniProtKB:Q16777	Histone H2A type 2-C OS=Homo sapiens GN=HIST2H2AC PE=1 SV=4	5670.11	55.81	1	0	7	316	448299127696	13.9798
UniProtKB:P14618	Pyruvate kinase isozymes M1/M2 OS=Homo sapiens GN=PKM2 PE=1 SV=4	5637.96	75.33	1	37	38	152	4.55496e+10	57.9
UniProtKB:P19338	Nucleolin OS=Homo sapiens GN=NCL PE=1 SV=3	5625.19	34.79	1	26	26	183	7.57826e+10	76.5684
UniProtKB:P04908	Histone H2A type 1-B/E OS=Homo sapiens GN=HIST1H2AB PE=1 SV=2	5552.6	33.08	1	0	6	314	448299127696	14.127
UniProtKB:Q93077	Histone H2A type 1-C OS=Homo sapiens GN=HIST1H2AC PE=1 SV=3	5552.6	33.08	1	0	6	314	448299127696	14.0969
UniProtKB:P20671	Histone H2A type 1-D OS=Homo sapiens GN=HIST1H2AD PE=1 SV=2	5552.6	33.08	1	0	6	314	448299127696	14.0989
UniProtKB:Q96KK5	Histone H2A type 1-H OS=Homo sapiens GN=HIST1H2AH PE=1 SV=3	5552.6	33.59	1	0	6	314	448299127696	13.8978
UniProtKB:Q99878	Histone H2A type 1-J OS=Homo sapiens GN=HIST1H2AJ PE=1 SV=3	5552.6	33.59	1	0	6	314	448299127696	13.9278
UniProtKB:P0C0S8	Histone H2A type 1 OS=Homo sapiens GN=HIST1H2AG PE=1 SV=2	5552.6	33.08	1	0	6	314	448299127696	14.0829
UniProtKB:Q7L7L0	Histone H2A type 3 OS=Homo sapiens GN=HIST3H2A PE=1 SV=3	5552.6	33.08	1	0	6	314	448299127696	14.1129
UniProtKB:Q9BTM1	Histone H2A.J OS=Homo sapiens GN=H2AFJ PE=1 SV=1	5552.6	33.33	1	0	6	314	448299127696	14.0109
UniProtKB:Q9Y490	Talin-1 OS=Homo sapiens GN=TLN1 PE=1 SV=3	5331	41.01	1	63	70	117	5298844324	269.599
UniProtKB:P22626	Heterogeneous nuclear ribonucleoproteins A2/B1 OS=Homo sapiens GN=HNRNPA2B1 PE=1 SV=2	5290.77	62.61	1	21	21	134	1.26583e+11	37.4067
UniProtKB:P12277	Creatine kinase B-type OS=Homo sapiens GN=CKB PE=1 SV=1	5241.76	79.79	1	21	21	213	102987756348	42.6173
UniProtKB:P08670	Vimentin OS=Homo sapiens GN=VIM PE=1 SV=4	5147.71	71.24	1	33	38	153	8.62698e+10	53.6191
UniProtKB:P22314	Ubiquitin-like modifier-activating enzyme 1 OS=Homo sapiens GN=UBA1 PE=1 SV=3	5086.42	55.39	1	42	42	122	3.392e+10	117.774
UniProtKB:O75643	U5 small nuclear ribonucleoprotein 200 kDa helicase OS=Homo sapiens GN=SNRNP200 PE=1 SV=2	5069.39	48.03	1	80	80	146	7.06604e+09	244.353
UniProtKB:P06748	Nucleophosmin OS=Homo sapiens GN=NPM1 PE=1 SV=2	4973.81	43.54	1	11	11	115	1.2441e+11	32.5548
UniProtKB:P04406	Glyceraldehyde-3-phosphate dehydrogenase OS=Homo sapiens GN=GAPDH PE=1 SV=3	4947.86	76.42	1	12	20	120	9.95668e+10	36.0304
UniProtKB:O75369	Filamin-B OS=Homo sapiens GN=FLNB PE=1 SV=2	4843.69	47.54	1	79	90	141	5.36678e+09	277.99
UniProtKB:P55072	Transitional endoplasmic reticulum ATPase OS=Homo sapiens GN=VCP PE=1 SV=4	4671.01	65.51	1	50	50	135	2.14269e+10	89.2657
UniProtKB:P68104	Elongation factor 1-alpha 1 OS=Homo sapiens GN=EEF1A1 PE=1 SV=1	4669.81	64.29	1	1	20	206	1.61311e+11	50.1091
UniProtKB:Q5VTE0	Putative elongation factor 1-alpha-like 3 OS=Homo sapiens GN=EEF1AL3 PE=5 SV=1	4630.85	50.43	1	0	18	204	1.61311e+11	50.1532
UniProtKB:P63104	14-3-3 protein zeta/delta OS=Homo sapiens GN=YWHAZ PE=1 SV=1	4495.16	74.69	1	19	24	246	7.05377e+10	27.7277
UniProtKB:P34931	Heat shock 70 kDa protein 1-like OS=Homo sapiens GN=HSPA1L PE=1 SV=2	4467.19	26.21	1	1	12	119	1.23671e+11	70.3313
UniProtKB:P14625	Endoplasmin OS=Homo sapiens GN=HSP90B1 PE=1 SV=1	4453.93	50.68	1	34	42	150	8.14585e+10	92.4113
UniProtKB:P62937	Peptidyl-prolyl cis-trans isomerase A OS=Homo sapiens GN=PPIA PE=1 SV=2	4354.67	67.27	1	8	11	126	1.22418e+11	18.0009
UniProtKB:P49321	Nuclear autoantigenic sperm protein OS=Homo sapiens GN=NASP PE=1 SV=2	4234.11	59.01	1	34	35	95	1.82115e+10	85.1861
UniProtKB:Q12906	Interleukin enhancer-binding factor 3 OS=Homo sapiens GN=ILF3 PE=1 SV=3	4139.07	48.55	1	32	34	110	1.45905e+10	95.2791
UniProtKB:Q9NY65	Tubulin alpha-8 chain OS=Homo sapiens GN=TUBA8 PE=1 SV=1	4108.03	40.98	1	1	15	106	1.11039e+11	50.0616
UniProtKB:P09651	Heterogeneous nuclear ribonucleoprotein A1 OS=Homo sapiens GN=HNRNPA1 PE=1 SV=5	4052.81	54.57	1	3	22	129	7.53525e+10	38.7231
UniProtKB:P34932	Heat shock 70 kDa protein 4 OS=Homo sapiens GN=HSPA4 PE=1 SV=4	3996.43	61.79	1	42	45	109	2.02095e+10	94.2712
UniProtKB:Q01082	Spectrin beta chain, brain 1 OS=Homo sapiens GN=SPTBN1 PE=1 SV=2	3955.37	46.32	1	79	82	118	7.77258e+09	274.439
UniProtKB:P12270	Nucleoprotein TPR OS=Homo sapiens GN=TPR PE=1 SV=3	3926.39	35.67	1	63	64	108	6.46857e+09	267.131
UniProtKB:P17987	T-complex protein 1 subunit alpha OS=Homo sapiens GN=TCP1 PE=1 SV=1	3874.45	70.14	1	32	32	92	1.68178e+10	60.3056
UniProtKB:P50990	T-complex protein 1 subunit theta OS=Homo sapiens GN=CCT8 PE=1 SV=4	3843.53	80.47	1	42	42	116	2.95678e+10	59.5825
UniProtKB:P61978	Heterogeneous nuclear ribonucleoprotein K OS=Homo sapiens GN=HNRNPK PE=1 SV=1	3820.89	70.19	1	30	30	136	64765149192	50.9444
UniProtKB:P11021	78 kDa glucose-regulated protein OS=Homo sapiens GN=HSPA5 PE=1 SV=2	3791.24	52.45	1	32	34	112	9.18552e+10	72.2884
UniProtKB:Q13509	Tubulin beta-3 chain OS=Homo sapiens GN=TUBB3 PE=1 SV=2	3746.69	52	1	4	22	142	1.42512e+11	50.4003
UniProtKB:P04075	Fructose-bisphosphate aldolase A OS=Homo sapiens GN=ALDOA PE=1 SV=2	3726.85	84.34	1	24	27	119	6.88919e+10	39.3953
UniProtKB:P31943	Heterogeneous nuclear ribonucleoprotein H OS=Homo sapiens GN=HNRNPH1 PE=1 SV=4	3725.71	53.23	1	13	19	100	48979308300	49.1984
UniProtKB:P49792	E3 SUMO-protein ligase RanBP2 OS=Homo sapiens GN=RANBP2 PE=1 SV=2	3693.2	31.2	1	51	71	99	3.14908e+09	357.974
UniProtKB:Q08211	ATP-dependent RNA helicase A OS=Homo sapiens GN=DHX9 PE=1 SV=4	3690.85	48.27	1	54	54	131	28564834144	140.869
UniProtKB:P48643	T-complex protein 1 subunit epsilon OS=Homo sapiens GN=CCT5 PE=1 SV=1	3600.44	68.76	1	34	34	109	34333918764	59.6328
UniProtKB:P13797	Plastin-3 OS=Homo sapiens GN=PLS3 PE=1 SV=4	3544.41	66.98	1	32	39	108	1.98591e+10	70.7662
UniProtKB:P00558	Phosphoglycerate kinase 1 OS=Homo sapiens GN=PGK1 PE=1 SV=3	3518.78	71.46	1	22	25	105	3.9951e+10	44.5861
UniProtKB:Q562R1	Beta-actin-like protein 2 OS=Homo sapiens GN=ACTBL2 PE=1 SV=2	3515.86	38.3	1	4	11	230	191419064358	41.976
UniProtKB:P13010	X-ray repair cross-complementing protein 5 OS=Homo sapiens GN=XRCC5 PE=1 SV=3	3510.17	50.55	1	37	37	108	2.44417e+10	82.6523
UniProtKB:Q92598	Heat shock protein 105 kDa OS=Homo sapiens GN=HSPH1 PE=1 SV=1	3506.29	68.3	1	41	44	97	2.37537e+10	96.8037
UniProtKB:O43707	Alpha-actinin-4 OS=Homo sapiens GN=ACTN4 PE=1 SV=2	3499.52	59.06	1	33	48	111	1.11766e+10	104.788
UniProtKB:A5A3E0	POTE ankyrin domain family member F OS=Homo sapiens GN=POTEF PE=1 SV=2	3475.42	5.77	1	0	6	189	2.93845e+11	121.367
UniProtKB:P60842	Eukaryotic initiation factor 4A-I OS=Homo sapiens GN=EIF4A1 PE=1 SV=1	3455.26	49.26	1	12	21	86	6.02978e+10	46.1246
UniProtKB:Q99832	T-complex protein 1 subunit eta OS=Homo sapiens GN=CCT7 PE=1 SV=2	3449.21	69.06	1	27	27	69	1.40346e+10	59.3289
UniProtKB:P55060	Exportin-2 OS=Homo sapiens GN=CSE1L PE=1 SV=3	3447.15	53.86	1	45	45	172	1.61364e+10	110.346
UniProtKB:Q12931	Heat shock protein 75 kDa, mitochondrial OS=Homo sapiens GN=TRAP1 PE=1 SV=3	3441.89	33.38	1	17	18	107	6.56409e+10	80.0597
UniProtKB:Q7Z6Z7	E3 ubiquitin-protein ligase HUWE1 OS=Homo sapiens GN=HUWE1 PE=1 SV=3	3336.04	23.39	1	64	64	88	4464375870	481.589
UniProtKB:P27708	CAD protein OS=Homo sapiens GN=CAD PE=1 SV=3	3315.93	39.51	1	64	64	108	8.33291e+09	242.829
UniProtKB:Q14974	Importin subunit beta-1 OS=Homo sapiens GN=KPNB1 PE=1 SV=2	3295.66	51.14	1	33	33	105	30870775926	97.108
UniProtKB:Q9BUF5	Tubulin beta-6 chain OS=Homo sapiens GN=TUBB6 PE=1 SV=1	3284.18	54.04	1	6	17	138	152953126661	49.825
UniProtKB:Q9BYX7	Putative beta-actin-like protein 3 OS=Homo sapiens GN=POTEKP PE=5 SV=1	3248.22	10.93	1	0	4	138	1.5785e+11	41.9888
UniProtKB:O00410	Importin-5 OS=Homo sapiens GN=IPO5 PE=1 SV=4	3248	43.03	1	34	36	86	1.32311e+10	123.55
UniProtKB:P0C7M2	Putative heterogeneous nuclear ribonucleoprotein A1-like 3 OS=Homo sapiens GN=HNRPA1L3 PE=5 SV=1	3224.78	49.06	1	0	19	117	7.53525e+10	34.2023
UniProtKB:P38646	Stress-70 protein, mitochondrial OS=Homo sapiens GN=HSPA9 PE=1 SV=2	3170.01	59.65	1	35	36	82	11066041694	73.6348
UniProtKB:P22102	Trifunctional purine biosynthetic protein adenosine-3 OS=Homo sapiens GN=GART PE=1 SV=1	3102.37	50.3	1	37	37	82	17039349768	107.699
UniProtKB:Q92616	Translational activator GCN1 OS=Homo sapiens GN=GCN1L1 PE=1 SV=6	3081.3	33.51	1	67	67	96	4.05652e+09	292.572
UniProtKB:Q92945	Far upstream element-binding protein 2 OS=Homo sapiens GN=KHSRP PE=1 SV=4	3070.84	56.54	1	29	30	97	3.0874e+10	73.07
UniProtKB:P11586	C-1-tetrahydrofolate synthase, cytoplasmic OS=Homo sapiens GN=MTHFD1 PE=1 SV=3	3051.39	67.49	1	46	46	99	14607155684	101.495
UniProtKB:P00338	L-lactate dehydrogenase A chain OS=Homo sapiens GN=LDHA PE=1 SV=2	3047.58	73.8	1	18	21	132	9.07265e+10	36.6654
UniProtKB:P50991	T-complex protein 1 subunit delta OS=Homo sapiens GN=CCT4 PE=1 SV=4	2971.79	69.94	1	30	31	87	1.68295e+10	57.8878
UniProtKB:Q58FG1	Putative heat shock protein HSP 90-alpha A4 OS=Homo sapiens GN=HSP90AA4P PE=5 SV=1	2907.13	7.42	1	0	3	97	3.46311e+10	47.6821
UniProtKB:Q86VP6	Cullin-associated NEDD8-dissociated protein 1 OS=Homo sapiens GN=CAND1 PE=1 SV=2	2906.2	44.8	1	42	44	95	7.284e+09	136.289
UniProtKB:P40227	T-complex protein 1 subunit zeta OS=Homo sapiens GN=CCT6A PE=1 SV=3	2898.56	64.78	1	20	25	78	21612740552	57.9876
UniProtKB:P26599	Polypyrimidine tract-binding protein 1 OS=Homo sapiens GN=PTBP1 PE=1 SV=1	2895.76	60.08	1	16	18	61	2.22833e+10	57.1856
UniProtKB:Q6P2Q9	Pre-mRNA-processing-splicing factor 8 OS=Homo sapiens GN=PRPF8 PE=1 SV=2	2892.84	36.66	1	73	73	116	5884073096	273.427
UniProtKB:P29401	Transketolase OS=Homo sapiens GN=TKT PE=1 SV=3	2871.68	63.56	1	29	29	79	34220801700	67.8347
UniProtKB:P25398	40S ribosomal protein S12 OS=Homo sapiens GN=RPS12 PE=1 SV=3	2822.95	71.97	1	10	10	78	3.3085e+10	14.5055
UniProtKB:P60174	Triosephosphate isomerase OS=Homo sapiens GN=TPI1 PE=1 SV=2	2819.38	81.53	1	17	19	80	8.74674e+10	26.6527
UniProtKB:Q13263	Transcription intermediary factor 1-beta OS=Homo sapiens GN=TRIM28 PE=1 SV=5	2818.52	61.44	1	28	28	66	1.65988e+10	88.4934
UniProtKB:P49368	T-complex protein 1 subunit gamma OS=Homo sapiens GN=CCT3 PE=1 SV=4	2816.13	64.95	1	36	36	88	4.15956e+10	60.4953
UniProtKB:P27348	14-3-3 protein theta OS=Homo sapiens GN=YWHAQ PE=1 SV=1	2797.25	66.12	1	12	17	143	5.61513e+10	27.7468
UniProtKB:Q15393	Splicing factor 3B subunit 3 OS=Homo sapiens GN=SF3B3 PE=1 SV=4	2779	38.21	1	33	33	77	1.22618e+10	135.492
UniProtKB:O14980	Exportin-1 OS=Homo sapiens GN=XPO1 PE=1 SV=1	2765.65	50.42	1	43	43	90	1.24382e+10	123.306
UniProtKB:O75533	Splicing factor 3B subunit 1 OS=Homo sapiens GN=SF3B1 PE=1 SV=3	2764.01	48.47	1	46	46	83	5.36536e+09	145.738
UniProtKB:Q15233	Non-POU domain-containing octamer-binding protein OS=Homo sapiens GN=NONO PE=1 SV=4	2744.76	56.48	1	22	23	85	3.76571e+10	54.1973
UniProtKB:P18206	Vinculin OS=Homo sapiens GN=VCL PE=1 SV=4	2694.06	45.06	1	43	43	74	6.07421e+09	123.722
UniProtKB:P05387	60S acidic ribosomal protein P2 OS=Homo sapiens GN=RPLP2 PE=1 SV=1	2689.68	80.87	1	9	9	84	79643400809	11.6578
UniProtKB:Q58FF8	Putative heat shock protein HSP 90-beta 2 OS=Homo sapiens GN=HSP90AB2P PE=1 SV=2	2656.68	22.31	1	0	12	136	151921642908	44.3211
UniProtKB:P13667	Protein disulfide-isomerase A4 OS=Homo sapiens GN=PDIA4 PE=1 SV=2	2654.8	53.18	1	35	35	75	15262031277	72.887
UniProtKB:Q15029	116 kDa U5 small nuclear ribonucleoprotein component OS=Homo sapiens GN=EFTUD2 PE=1 SV=1	2625.86	55.04	1	37	38	73	2.33698e+10	109.366
UniProtKB:P26641	Elongation factor 1-gamma OS=Homo sapiens GN=EEF1G PE=1 SV=3	2619.96	69.57	1	30	30	83	3.4265e+10	50.0871
UniProtKB:Q32P51	Heterogeneous nuclear ribonucleoprotein A1-like 2 OS=Homo sapiens GN=HNRNPA1L2 PE=2 SV=2	2600.55	32.81	1	0	13	97	7.53525e+10	34.2043
UniProtKB:P12956	X-ray repair cross-complementing protein 6 OS=Homo sapiens GN=XRCC6 PE=1 SV=2	2595.11	55.67	1	32	32	79	10753670866	69.7991
UniProtKB:P43243	Matrin-3 OS=Homo sapiens GN=MATR3 PE=1 SV=2	2589.46	59.62	1	39	39	90	4.11439e+10	94.5648
UniProtKB:P07814	Bifunctional aminoacyl-tRNA synthetase OS=Homo sapiens GN=EPRS PE=1 SV=5	2569.06	43.06	1	49	50	85	6.90767e+09	170.483
UniProtKB:P31948	Stress-induced-phosphoprotein 1 OS=Homo sapiens GN=STIP1 PE=1 SV=1	2560.53	55.25	1	28	28	82	2.65099e+10	62.5994
UniProtKB:P30153	Serine/threonine-protein phosphatase 2A 65 kDa regulatory subunit A alpha isoform OS=Homo sapiens GN=PPP2R1A PE=1 SV=4	2530.67	53.48	1	21	28	72	1.70846e+10	65.2669
UniProtKB:P63241	Eukaryotic translation initiation factor 5A-1 OS=Homo sapiens GN=EIF5A PE=1 SV=2	2515.34	88.31	1	4	14	70	3.70966e+10	16.8214
UniProtKB:A6NNZ2	Tubulin beta-8 chain B OS=Homo sapiens PE=1 SV=1	2515	20.95	1	0	9	142	152953126661	49.5406
UniProtKB:Q14980	Nuclear mitotic apparatus protein 1 OS=Homo sapiens GN=NUMA1 PE=1 SV=2	2512.38	30.4	1	46	46	63	2.45831e+09	238.115
UniProtKB:P11940	Polyadenylate-binding protein 1 OS=Homo sapiens GN=PABPC1 PE=1 SV=2	2509.71	53.77	1	6	29	83	3.20147e+10	70.6259
UniProtKB:P67809	Nuclease-sensitive element-binding protein 1 OS=Homo sapiens GN=YBX1 PE=1 SV=3	2504.89	68.21	1	9	16	68	3.75971e+10	35.9027
UniProtKB:Q99460	26S proteasome non-ATPase regulatory subunit 1 OS=Homo sapiens GN=PSMD1 PE=1 SV=2	2482.4	52.36	1	33	33	63	6.38744e+09	105.769
UniProtKB:P53396	ATP-citrate synthase OS=Homo sapiens GN=ACLY PE=1 SV=3	2469.93	52.77	1	48	48	92	15869052626	120.762
UniProtKB:P49588	Alanyl-tRNA synthetase, cytoplasmic OS=Homo sapiens GN=AARS PE=1 SV=2	2459.04	43.39	1	33	33	59	7.09988e+09	106.743
UniProtKB:P50395	Rab GDP dissociation inhibitor beta OS=Homo sapiens GN=GDI2 PE=1 SV=2	2458.22	66.07	1	18	28	72	16816338879	50.6309
UniProtKB:Q02790	Peptidyl-prolyl cis-trans isomerase FKBP4 OS=Homo sapiens GN=FKBP4 PE=1 SV=3	2455.39	67.76	1	28	28	78	2.47892e+10	51.7721
UniProtKB:P31150	Rab GDP dissociation inhibitor alpha OS=Homo sapiens GN=GDI1 PE=1 SV=2	2410.59	62.19	1	14	24	64	1.20922e+10	50.5501
UniProtKB:Q13838	Spliceosome RNA helicase BAT1 OS=Homo sapiens GN=BAT1 PE=1 SV=1	2398.67	57.48	1	12	22	78	2.9208e+10	48.9599
UniProtKB:Q14568	Putative heat shock protein HSP 90-alpha A2 OS=Homo sapiens GN=HSP90AA2 PE=1 SV=2	2369.95	23.62	1	0	7	118	1.71442e+11	39.3404
UniProtKB:P33991	DNA replication licensing factor MCM4 OS=Homo sapiens GN=MCM4 PE=1 SV=5	2366.17	56.08	1	41	42	67	8.86094e+09	96.4976
UniProtKB:Q12905	Interleukin enhancer-binding factor 2 OS=Homo sapiens GN=ILF2 PE=1 SV=2	2358.83	64.36	1	15	15	49	2.2269e+10	43.0352
UniProtKB:Q3ZCM7	Tubulin beta-8 chain OS=Homo sapiens GN=TUBB8 PE=1 SV=2	2352.06	17.12	1	0	9	142	152953126661	49.7439
UniProtKB:Q9UQ35	Serine/arginine repetitive matrix protein 2 OS=Homo sapiens GN=SRRM2 PE=1 SV=2	2350.55	26.16	1	48	48	86	1.34002e+10	299.438
UniProtKB:P06744	Glucose-6-phosphate isomerase OS=Homo sapiens GN=GPI PE=1 SV=4	2339.16	50.72	1	17	23	76	2.77614e+10	63.1072
UniProtKB:Q00839	Heterogeneous nuclear ribonucleoprotein U OS=Homo sapiens GN=HNRNPU PE=1 SV=6	2336.01	41.58	1	31	31	80	3.5199e+10	90.528
UniProtKB:P09211	Glutathione S-transferase P OS=Homo sapiens GN=GSTP1 PE=1 SV=2	2330.61	61.43	1	10	10	48	3.17642e+10	23.341
UniProtKB:Q02952	A-kinase anchor protein 12 OS=Homo sapiens GN=AKAP12 PE=1 SV=3	2318.72	33.33	1	39	39	55	3.72992e+09	191.368
UniProtKB:O43175	D-3-phosphoglycerate dehydrogenase OS=Homo sapiens GN=PHGDH PE=1 SV=4	2306.37	50.66	1	23	23	69	3.59331e+10	56.6144
UniProtKB:P31939	Bifunctional purine biosynthesis protein PURH OS=Homo sapiens GN=ATIC PE=1 SV=3	2292.67	68.75	1	30	30	61	9960746385	64.5753
UniProtKB:P30101	Protein disulfide-isomerase A3 OS=Homo sapiens GN=PDIA3 PE=1 SV=4	2286.97	55.25	1	25	25	66	1.37843e+10	56.7468
UniProtKB:P20700	Lamin-B1 OS=Homo sapiens GN=LMNB1 PE=1 SV=2	2271.89	59.39	1	33	36	81	2.11463e+10	66.3676
UniProtKB:Q05639	Elongation factor 1-alpha 2 OS=Homo sapiens GN=EEF1A2 PE=1 SV=1	2231.81	38.01	1	3	11	131	116626345784	50.4383
UniProtKB:P06454	Prothymosin alpha OS=Homo sapiens GN=PTMA PE=1 SV=2	2187.92	37.84	1	7	7	63	4.86118e+10	12.196
UniProtKB:P05455	Lupus La protein OS=Homo sapiens GN=SSB PE=1 SV=2	2185.81	53.68	1	27	27	77	18178053498	46.8082
UniProtKB:P54652	Heat shock-related 70 kDa protein 2 OS=Homo sapiens GN=HSPA2 PE=1 SV=1	2178.29	18.94	1	1	14	90	1.12828e+11	69.9779
UniProtKB:Q58FF7	Putative heat shock protein HSP 90-beta-3 OS=Homo sapiens GN=HSP90AB3P PE=5 SV=1	2178.17	21.27	1	0	18	108	1.76551e+11	68.282
UniProtKB:P42704	Leucine-rich PPR motif-containing protein, mitochondrial OS=Homo sapiens GN=LRPPRC PE=1 SV=3	2167.05	36.44	1	38	38	63	2.50926e+09	157.805
UniProtKB:Q00341	Vigilin OS=Homo sapiens GN=HDLBP PE=1 SV=2	2158.38	34.46	1	36	36	59	3.49401e+09	141.368
UniProtKB:P31946	14-3-3 protein beta/alpha OS=Homo sapiens GN=YWHAB PE=1 SV=3	2139.58	60.57	1	7	14	126	53183874866	28.0648
UniProtKB:P12004	Proliferating cell nuclear antigen OS=Homo sapiens GN=PCNA PE=1 SV=1	2135.72	83.14	1	18	18	62	26233050056	28.7503
UniProtKB:P29966	Myristoylated alanine-rich C-kinase substrate OS=Homo sapiens GN=MARCKS PE=1 SV=4	2128.2	48.19	1	11	11	48	20922257261	31.5359
UniProtKB:Q16531	DNA damage-binding protein 1 OS=Homo sapiens GN=DDB1 PE=1 SV=1	2116.91	46.49	1	47	47	85	6665860252	126.887
UniProtKB:Q9UQ80	Proliferation-associated protein 2G4 OS=Homo sapiens GN=PA2G4 PE=1 SV=3	2106.54	59.9	1	20	20	64	3.57511e+10	43.7592
UniProtKB:P62979	Ubiquitin-40S ribosomal protein S27a OS=Homo sapiens GN=RPS27A PE=1 SV=2	2094.22	51.92	1	2	7	121	1.45158e+11	17.9535
UniProtKB:P12268	Inosine-5'-monophosphate dehydrogenase 2 OS=Homo sapiens GN=IMPDH2 PE=1 SV=2	2084.82	54.67	1	25	26	56	1.50788e+10	55.7696
UniProtKB:P06576	ATP synthase subunit beta, mitochondrial OS=Homo sapiens GN=ATP5B PE=1 SV=3	2070.7	61.44	1	22	22	56	1.79018e+10	56.5246
UniProtKB:P12814	Alpha-actinin-1 OS=Homo sapiens GN=ACTN1 PE=1 SV=2	2063.5	42.04	1	16	31	61	1.11766e+10	102.993
UniProtKB:P23528	Cofilin-1 OS=Homo sapiens GN=CFL1 PE=1 SV=3	2060.09	76.51	1	10	16	67	6.4063e+10	18.4907
UniProtKB:P46940	Ras GTPase-activating-like protein IQGAP1 OS=Homo sapiens GN=IQGAP1 PE=1 SV=1	2058.66	31.26	1	33	36	46	2.32434e+09	189.134
UniProtKB:P05023	Sodium/potassium-transporting ATPase subunit alpha-1 OS=Homo sapiens GN=ATP1A1 PE=1 SV=1	2043.65	34.6	1	16	30	59	8.02834e+09	112.824
UniProtKB:P05388	60S acidic ribosomal protein P0 OS=Homo sapiens GN=RPLP0 PE=1 SV=1	2038.7	60.25	1	6	16	57	25674254572	34.2518
UniProtKB:O14979	Heterogeneous nuclear ribonucleoprotein D-like OS=Homo sapiens GN=HNRPDL PE=1 SV=3	2022.94	29.29	1	11	14	89	17938839867	46.4091
UniProtKB:P09874	Poly [ADP-ribose] polymerase 1 OS=Homo sapiens GN=PARP1 PE=1 SV=4	2000.89	40.73	1	39	39	72	12215359274	113.012
UniProtKB:P25205	DNA replication licensing factor MCM3 OS=Homo sapiens GN=MCM3 PE=1 SV=3	1994.73	54.58	1	39	39	63	8088626194	90.924
UniProtKB:Q15365	Poly(rC)-binding protein 1 OS=Homo sapiens GN=PCBP1 PE=1 SV=2	1984.07	63.76	1	10	15	56	3.80642e+10	37.4739
UniProtKB:P46060	Ran GTPase-activating protein 1 OS=Homo sapiens GN=RANGAP1 PE=1 SV=1	1979.51	50.77	1	27	27	61	1.00784e+10	63.5023
UniProtKB:P39023	60S ribosomal protein L3 OS=Homo sapiens GN=RPL3 PE=1 SV=2	1974.4	43.67	1	14	16	58	3.83412e+10	46.0798
UniProtKB:P51991	Heterogeneous nuclear ribonucleoprotein A3 OS=Homo sapiens GN=HNRNPA3 PE=1 SV=2	1943.52	46.03	1	17	19	61	36571118016	39.5706
UniProtKB:P22234	Multifunctional protein ADE2 OS=Homo sapiens GN=PAICS PE=1 SV=3	1943.1	56.47	1	22	22	51	1.6727e+10	47.0491
UniProtKB:P55795	Heterogeneous nuclear ribonucleoprotein H2 OS=Homo sapiens GN=HNRNPH2 PE=1 SV=1	1938.84	40.53	1	8	13	48	3.96081e+10	49.2323
UniProtKB:Q15366	Poly(rC)-binding protein 2 OS=Homo sapiens GN=PCBP2 PE=1 SV=1	1934.06	61.1	1	9	15	60	5.80631e+10	38.5556
UniProtKB:Q6IS14	Eukaryotic translation initiation factor 5A-1-like OS=Homo sapiens GN=EIF5AL1 PE=1 SV=2	1917.35	64.94	1	0	9	54	3.53035e+10	16.7623
UniProtKB:P17066	Heat shock 70 kDa protein 6 OS=Homo sapiens GN=HSPA6 PE=1 SV=2	1916.86	17.88	1	1	10	80	7.48705e+10	70.9842
UniProtKB:Q9HAV4	Exportin-5 OS=Homo sapiens GN=XPO5 PE=1 SV=1	1915.63	43.19	1	37	37	58	4584225422	136.222
UniProtKB:Q13200	26S proteasome non-ATPase regulatory subunit 2 OS=Homo sapiens GN=PSMD2 PE=1 SV=3	1913.46	46.81	1	33	33	61	1.2876e+10	100.136
UniProtKB:Q14697	Neutral alpha-glucosidase AB OS=Homo sapiens GN=GANAB PE=1 SV=3	1908.5	46.29	1	33	33	69	1.17875e+10	106.807
UniProtKB:P23246	Splicing factor, proline- and glutamine-rich OS=Homo sapiens GN=SFPQ PE=1 SV=2	1900.48	37.91	1	23	24	62	3.24031e+10	76.1016
UniProtKB:O00571	ATP-dependent RNA helicase DDX3X OS=Homo sapiens GN=DDX3X PE=1 SV=3	1892.38	48.79	1	7	28	63	1.11792e+10	73.198
UniProtKB:Q01130	Serine/arginine-rich splicing factor 2 OS=Homo sapiens GN=SRSF2 PE=1 SV=4	1889.65	25.34	1	4	6	32	19725906156	25.4612
UniProtKB:P07910	Heterogeneous nuclear ribonucleoproteins C1/C2 OS=Homo sapiens GN=HNRNPC PE=1 SV=4	1877.47	54.9	1	12	20	73	9.07727e+10	33.6495
UniProtKB:O95373	Importin-7 OS=Homo sapiens GN=IPO7 PE=1 SV=1	1876.62	35.84	1	27	28	56	1.16983e+10	119.44
UniProtKB:P15311	Ezrin OS=Homo sapiens GN=EZR PE=1 SV=4	1873.28	45.39	1	18	31	62	9.07776e+09	69.3697
UniProtKB:P06737	Glycogen phosphorylase, liver form OS=Homo sapiens GN=PYGL PE=1 SV=4	1868.54	43.09	1	30	35	61	3.74393e+09	97.087
UniProtKB:Q15181	Inorganic pyrophosphatase OS=Homo sapiens GN=PPA1 PE=1 SV=2	1866.4	75.78	1	18	18	52	1.98935e+10	32.6392
UniProtKB:Q14566	DNA replication licensing factor MCM6 OS=Homo sapiens GN=MCM6 PE=1 SV=1	1860.63	47.02	1	38	38	74	2.14418e+10	92.8312
UniProtKB:Q92841	Probable ATP-dependent RNA helicase DDX17 OS=Homo sapiens GN=DDX17 PE=1 SV=1	1846.52	44.77	1	23	31	70	2.08134e+10	72.326
UniProtKB:P61981	14-3-3 protein gamma OS=Homo sapiens GN=YWHAG PE=1 SV=2	1838.44	64.78	1	9	15	123	39494831874	28.2849
UniProtKB:Q9Y5B9	FACT complex subunit SPT16 OS=Homo sapiens GN=SUPT16H PE=1 SV=1	1837.27	37.82	1	38	39	69	6.74089e+09	119.838
UniProtKB:Q14203	Dynactin subunit 1 OS=Homo sapiens GN=DCTN1 PE=1 SV=3	1834.8	33.26	1	31	31	52	3.89989e+09	141.607
UniProtKB:O95757	Heat shock 70 kDa protein 4L OS=Homo sapiens GN=HSPA4L PE=1 SV=3	1829.2	42.67	1	24	28	53	2.01076e+10	94.4525
UniProtKB:P53618	Coatomer subunit beta OS=Homo sapiens GN=COPB1 PE=1 SV=3	1817.82	43.76	1	33	33	61	4764366304	107.074
UniProtKB:Q9BQG0	Myb-binding protein 1A OS=Homo sapiens GN=MYBBP1A PE=1 SV=2	1807.08	31.7	1	41	41	62	4.42947e+09	148.762
UniProtKB:Q93008	Probable ubiquitin carboxyl-terminal hydrolase FAF-X OS=Homo sapiens GN=USP9X PE=1 SV=2	1805.29	19.51	1	23	40	57	1.74469e+09	289.356
UniProtKB:P52292	Importin subunit alpha-2 OS=Homo sapiens GN=KPNA2 PE=1 SV=1	1803.45	36.86	1	16	16	37	1.05652e+10	57.8259
UniProtKB:Q99613	Eukaryotic translation initiation factor 3 subunit C OS=Homo sapiens GN=EIF3C PE=1 SV=1	1802.98	34.06	1	29	30	56	8.58059e+09	105.278
UniProtKB:CON_P02769	(Bos taurus) Bovine serum albumin precursor	1798.12	54.7	1	27	30	63	9.17528e+09	69.2484
UniProtKB:P09972	Fructose-bisphosphate aldolase C OS=Homo sapiens GN=ALDOC PE=1 SV=2	1787.74	20.88	1	2	5	36	22819950619	39.4312
UniProtKB:P38919	Eukaryotic initiation factor 4A-III OS=Homo sapiens GN=EIF4A3 PE=1 SV=4	1787.73	58.64	1	21	24	68	22469440335	46.8412
UniProtKB:Q92499	ATP-dependent RNA helicase DDX1 OS=Homo sapiens GN=DDX1 PE=1 SV=2	1785.66	54.73	1	37	37	61	6.3447e+09	82.3798
UniProtKB:P08758	Annexin A5 OS=Homo sapiens GN=ANXA5 PE=1 SV=2	1780.5	63.13	1	17	17	40	18795525012	35.9144
UniProtKB:P78527	DNA-dependent protein kinase catalytic subunit OS=Homo sapiens GN=PRKDC PE=1 SV=3	1777.84	14.95	1	46	46	57	1.32764e+09	468.788
UniProtKB:P33993	DNA replication licensing factor MCM7 OS=Homo sapiens GN=MCM7 PE=1 SV=4	1774.33	48.54	1	33	33	62	9.87311e+09	81.2566
UniProtKB:P55209	Nucleosome assembly protein 1-like 1 OS=Homo sapiens GN=NAP1L1 PE=1 SV=1	1768.33	45.52	1	9	11	48	21772037286	45.3459
UniProtKB:Q99714	3-hydroxyacyl-CoA dehydrogenase type-2 OS=Homo sapiens GN=HSD17B10 PE=1 SV=3	1758.84	75.1	1	15	15	37	5.12484e+09	26.9061
UniProtKB:O60763	General vesicular transport factor p115 OS=Homo sapiens GN=USO1 PE=1 SV=2	1757.24	31.39	1	21	22	44	3.96623e+09	107.828
UniProtKB:CON_P10096	(Bos taurus) Glyceraldehyde-3-phosphate dehydrogenase	1744.53	30.93	1	1	9	52	7.51828e+10	35.8453
UniProtKB:O75694	Nuclear pore complex protein Nup155 OS=Homo sapiens GN=NUP155 PE=1 SV=1	1743.26	31.85	1	33	33	45	3431014969	155.1
UniProtKB:Q96A08	Histone H2B type 1-A OS=Homo sapiens GN=HIST1H2BA PE=1 SV=3	1741.03	12.6	1	0	2	182	3.02452e+11	14.1587
UniProtKB:Q9NU22	Midasin OS=Homo sapiens GN=MDN1 PE=1 SV=2	1739.14	12.6	1	49	49	57	1.17526e+09	632.42
UniProtKB:P49411	Elongation factor Tu, mitochondrial OS=Homo sapiens GN=TUFM PE=1 SV=2	1727.89	46.68	1	17	17	34	5.98686e+09	49.5102
UniProtKB:Q99497	Protein DJ-1 OS=Homo sapiens GN=PARK7 PE=1 SV=2	1727.44	80.95	1	14	14	54	4.29125e+10	19.8785
UniProtKB:P07237	Protein disulfide-isomerase OS=Homo sapiens GN=P4HB PE=1 SV=3	1722.31	51.38	1	27	27	59	1.14628e+10	57.0807
UniProtKB:Q13310	Polyadenylate-binding protein 4 OS=Homo sapiens GN=PABPC4 PE=1 SV=1	1718.92	39.29	1	13	24	62	1.88742e+10	70.7381
UniProtKB:Q7KZF4	Staphylococcal nuclease domain-containing protein 1 OS=Homo sapiens GN=SND1 PE=1 SV=1	1717.02	49.01	1	37	37	58	8019167620	101.934
UniProtKB:P53621	Coatomer subunit alpha OS=Homo sapiens GN=COPA PE=1 SV=2	1714.25	42.81	1	42	42	62	5.73129e+09	138.258
UniProtKB:P62987	Ubiquitin-60S ribosomal protein L40 OS=Homo sapiens GN=UBA52 PE=1 SV=2	1713.71	38.28	1	0	5	114	1.45158e+11	14.719
UniProtKB:P0CG47	Polyubiquitin-B OS=Homo sapiens GN=UBB PE=1 SV=1	1713.71	64.19	1	0	5	114	1.45158e+11	25.7458
UniProtKB:P0CG48	Polyubiquitin-C OS=Homo sapiens GN=UBC PE=1 SV=2	1713.71	63.07	1	0	5	114	1.45158e+11	76.9815
UniProtKB:P18669	Phosphoglycerate mutase 1 OS=Homo sapiens GN=PGAM1 PE=1 SV=2	1705.44	68.5	1	7	14	60	5.08841e+10	28.7858
UniProtKB:P54136	Arginyl-tRNA synthetase, cytoplasmic OS=Homo sapiens GN=RARS PE=1 SV=2	1703.51	58.79	1	32	32	55	5.12466e+09	75.3309
UniProtKB:P49915	GMP synthase [glutamine-hydrolyzing] OS=Homo sapiens GN=GMPS PE=1 SV=1	1700.48	53.97	1	30	30	61	9.10326e+09	76.667
UniProtKB:Q15149	Plectin OS=Homo sapiens GN=PLEC PE=1 SV=3	1698.84	16.03	1	54	57	65	2.1539e+09	531.466
UniProtKB:O00429	Dynamin-1-like protein OS=Homo sapiens GN=DNM1L PE=1 SV=2	1687.23	51.77	1	27	27	40	2.21297e+09	81.8261
UniProtKB:Q9Y4L1	Hypoxia up-regulated protein 1 OS=Homo sapiens GN=HYOU1 PE=1 SV=1	1684.64	41.64	1	28	29	49	3884007848	111.266
UniProtKB:Q92621	Nuclear pore complex protein Nup205 OS=Homo sapiens GN=NUP205 PE=1 SV=3	1682.47	25.89	1	42	42	58	2.58303e+09	227.776
UniProtKB:Q15459	Splicing factor 3A subunit 1 OS=Homo sapiens GN=SF3A1 PE=1 SV=1	1678.09	42.75	1	28	28	56	9.31324e+09	88.8305
UniProtKB:O15067	Phosphoribosylformylglycinamidine synthase OS=Homo sapiens GN=PFAS PE=1 SV=3	1665.72	38.12	1	34	34	53	7082619296	144.633
UniProtKB:P14866	Heterogeneous nuclear ribonucleoprotein L OS=Homo sapiens GN=HNRNPL PE=1 SV=2	1654.28	40.75	1	17	18	48	2.47116e+10	64.0924
UniProtKB:P15924	Desmoplakin OS=Homo sapiens GN=DSP PE=1 SV=3	1653.42	16.93	1	36	36	48	1592649084	331.569
UniProtKB:Q9Y678	Coatomer subunit gamma OS=Homo sapiens GN=COPG PE=1 SV=1	1652.51	41.65	1	23	27	45	4.47727e+09	97.6555
UniProtKB:Q13435	Splicing factor 3B subunit 2 OS=Homo sapiens GN=SF3B2 PE=1 SV=2	1651.29	38.99	1	25	25	57	9.17218e+09	100.165
UniProtKB:P27694	Replication protein A 70 kDa DNA-binding subunit OS=Homo sapiens GN=RPA1 PE=1 SV=2	1648.89	45.94	1	25	25	50	6.60948e+09	68.0953
UniProtKB:P49736	DNA replication licensing factor MCM2 OS=Homo sapiens GN=MCM2 PE=1 SV=4	1644.08	40.93	1	26	26	46	12008794473	101.832
UniProtKB:P26038	Moesin OS=Homo sapiens GN=MSN PE=1 SV=3	1642.8	44.54	1	14	28	52	14595891678	67.7778
UniProtKB:P52597	Heterogeneous nuclear ribonucleoprotein F OS=Homo sapiens GN=HNRNPF PE=1 SV=3	1640.24	51.81	1	12	14	43	31840262380	45.6429
UniProtKB:P17844	Probable ATP-dependent RNA helicase DDX5 OS=Homo sapiens GN=DDX5 PE=1 SV=1	1621.79	52.12	1	22	30	64	18860520965	69.1047
UniProtKB:P23526	Adenosylhomocysteinase OS=Homo sapiens GN=AHCY PE=1 SV=4	1620.43	51.62	1	20	20	48	1.82832e+10	47.6852
UniProtKB:P36578	60S ribosomal protein L4 OS=Homo sapiens GN=RPL4 PE=1 SV=5	1619.26	47.07	1	23	23	69	5.15959e+10	47.6674
UniProtKB:Q9UHX1	Poly(U)-binding-splicing factor PUF60 OS=Homo sapiens GN=PUF60 PE=1 SV=1	1612.96	42.04	1	18	18	41	8.19027e+09	59.8376
UniProtKB:P41252	Isoleucyl-tRNA synthetase, cytoplasmic OS=Homo sapiens GN=IARS PE=1 SV=2	1606.92	35.74	1	35	35	52	7.81561e+09	144.406
UniProtKB:P30041	Peroxiredoxin-6 OS=Homo sapiens GN=PRDX6 PE=1 SV=3	1601.19	80.8	1	20	20	58	3.01196e+10	25.0192
UniProtKB:Q9Y3F4	Serine-threonine kinase receptor-associated protein OS=Homo sapiens GN=STRAP PE=1 SV=1	1595.68	69.71	1	18	18	38	1.17455e+10	38.414
UniProtKB:P62158	Calmodulin OS=Homo sapiens GN=CALM1 PE=1 SV=2	1594.22	71.14	1	10	12	53	2.64088e+10	16.8268
UniProtKB:P16989	DNA-binding protein A OS=Homo sapiens GN=CSDA PE=1 SV=4	1593.39	69.09	1	10	17	42	1.55169e+10	40.066
UniProtKB:Q13428	Treacle protein OS=Homo sapiens GN=TCOF1 PE=1 SV=3	1589.78	25.2	1	29	29	54	4.59968e+09	152.015
UniProtKB:Q04917	14-3-3 protein eta OS=Homo sapiens GN=YWHAH PE=1 SV=4	1574.89	60.57	1	13	17	110	4.1764e+10	28.201
UniProtKB:P48741	Putative heat shock 70 kDa protein 7 OS=Homo sapiens GN=HSPA7 PE=5 SV=2	1573.61	13.35	1	0	5	63	7.48705e+10	40.2196
UniProtKB:Q13620	Cullin-4B OS=Homo sapiens GN=CUL4B PE=1 SV=4	1560.64	31.33	1	16	25	43	2.86892e+09	103.916
UniProtKB:P09960	Leukotriene A-4 hydrolase OS=Homo sapiens GN=LTA4H PE=1 SV=2	1558.13	56.46	1	27	27	48	7379344149	69.2412
UniProtKB:Q15021	Condensin complex subunit 1 OS=Homo sapiens GN=NCAPD2 PE=1 SV=3	1555.2	28.19	1	26	26	38	1699167616	157.082
UniProtKB:P23921	Ribonucleoside-diphosphate reductase large subunit OS=Homo sapiens GN=RRM1 PE=1 SV=1	1554.15	36.49	1	22	22	45	6.16751e+09	90.0125
UniProtKB:Q99733	Nucleosome assembly protein 1-like 4 OS=Homo sapiens GN=NAP1L4 PE=1 SV=1	1550.75	40.53	1	9	11	38	11516026782	42.7969
UniProtKB:Q9UBT2	SUMO-activating enzyme subunit 2 OS=Homo sapiens GN=UBA2 PE=1 SV=2	1550.06	50	1	23	23	40	6.82038e+09	71.1792
UniProtKB:P27816	Microtubule-associated protein 4 OS=Homo sapiens GN=MAP4 PE=1 SV=3	1538.93	33.94	1	30	30	54	4.04109e+09	120.93
UniProtKB:P60228	Eukaryotic translation initiation factor 3 subunit E OS=Homo sapiens GN=EIF3E PE=1 SV=1	1536.57	47.64	1	19	19	50	1.07891e+10	52.1874
UniProtKB:P46777	60S ribosomal protein L5 OS=Homo sapiens GN=RPL5 PE=1 SV=3	1535.71	51.18	1	13	13	58	2.72747e+10	34.3407
UniProtKB:P26639	Threonyl-tRNA synthetase, cytoplasmic OS=Homo sapiens GN=TARS PE=1 SV=3	1528.7	46.2	1	29	32	56	9132685584	83.3819
UniProtKB:O75534	Cold shock domain-containing protein E1 OS=Homo sapiens GN=CSDE1 PE=1 SV=2	1521.61	43.98	1	33	33	56	7.00307e+09	88.8289
UniProtKB:P37802	Transgelin-2 OS=Homo sapiens GN=TAGLN2 PE=1 SV=3	1521.56	86.43	1	17	18	46	2.21288e+10	22.3772
UniProtKB:Q9H583	HEAT repeat-containing protein 1 OS=Homo sapiens GN=HEATR1 PE=1 SV=3	1516.26	23.32	1	41	41	54	3.07505e+09	242.215
UniProtKB:O00148	ATP-dependent RNA helicase DDX39 OS=Homo sapiens GN=DDX39 PE=1 SV=2	1513.87	59.72	1	9	19	55	2.75874e+10	49.098
UniProtKB:Q96AE4	Far upstream element-binding protein 1 OS=Homo sapiens GN=FUBP1 PE=1 SV=3	1509.81	50.47	1	23	25	46	1.53545e+10	67.5185
UniProtKB:Q14240	Eukaryotic initiation factor 4A-II OS=Homo sapiens GN=EIF4A2 PE=1 SV=2	1509.44	44.47	1	8	18	43	33407642400	46.3728
UniProtKB:Q9NR30	Nucleolar RNA helicase 2 OS=Homo sapiens GN=DDX21 PE=1 SV=5	1508.52	42.78	1	32	34	55	5241233480	87.2904
UniProtKB:Q9UQE7	Structural maintenance of chromosomes protein 3 OS=Homo sapiens GN=SMC3 PE=1 SV=2	1505.53	35.25	1	39	40	57	2.66807e+09	141.454
UniProtKB:P30086	Phosphatidylethanolamine-binding protein 1 OS=Homo sapiens GN=PEBP1 PE=1 SV=3	1498.49	75.4	1	11	11	35	1.47188e+10	21.0437
UniProtKB:Q10567	AP-1 complex subunit beta-1 OS=Homo sapiens GN=AP1B1 PE=1 SV=2	1496.54	41.94	1	19	35	54	7.20375e+09	104.57
UniProtKB:Q9Y2W1	Thyroid hormone receptor-associated protein 3 OS=Homo sapiens GN=THRAP3 PE=1 SV=2	1492.63	31.62	1	26	27	49	6651332664	108.601
UniProtKB:P07737	Profilin-1 OS=Homo sapiens GN=PFN1 PE=1 SV=2	1487.57	90	1	7	12	68	82465251586	15.0446
UniProtKB:P63244	Guanine nucleotide-binding protein subunit beta-2-like 1 OS=Homo sapiens GN=GNB2L1 PE=1 SV=3	1481.95	72.24	1	22	22	51	1.61026e+10	35.0546
UniProtKB:P22392	Nucleoside diphosphate kinase B OS=Homo sapiens GN=NME2 PE=1 SV=1	1481.28	65.13	1	1	8	47	7.15126e+10	17.2869
UniProtKB:P13489	Ribonuclease inhibitor OS=Homo sapiens GN=RNH1 PE=1 SV=2	1466.88	56.62	1	16	16	29	4855425319	49.9411
UniProtKB:Q99536	Synaptic vesicle membrane protein VAT-1 homolog OS=Homo sapiens GN=VAT1 PE=1 SV=2	1450.09	49.62	1	12	13	34	3980278808	41.8934
UniProtKB:Q14152	Eukaryotic translation initiation factor 3 subunit A OS=Homo sapiens GN=EIF3A PE=1 SV=1	1450	35.82	1	47	47	75	8.14873e+09	166.468
UniProtKB:P40926	Malate dehydrogenase, mitochondrial OS=Homo sapiens GN=MDH2 PE=1 SV=3	1446.28	58.28	1	15	15	46	2.44569e+10	35.4807
UniProtKB:Q04637	Eukaryotic translation initiation factor 4 gamma 1 OS=Homo sapiens GN=EIF4G1 PE=1 SV=4	1444.41	27.83	1	31	38	61	6.9579e+09	175.382
UniProtKB:P15880	40S ribosomal protein S2 OS=Homo sapiens GN=RPS2 PE=1 SV=2	1442.66	55.97	1	14	14	46	2.66681e+10	31.3046
UniProtKB:Q5T4S7	E3 ubiquitin-protein ligase UBR4 OS=Homo sapiens GN=UBR4 PE=1 SV=1	1441.65	11.77	1	41	41	47	1543619806	573.476
UniProtKB:P62191	26S protease regulatory subunit 4 OS=Homo sapiens GN=PSMC1 PE=1 SV=1	1441.25	47.5	1	15	16	37	7.57066e+09	49.1537
UniProtKB:O00232	26S proteasome non-ATPase regulatory subunit 12 OS=Homo sapiens GN=PSMD12 PE=1 SV=3	1438.75	45.83	1	16	17	35	3.61004e+09	52.8706
UniProtKB:O43390	Heterogeneous nuclear ribonucleoprotein R OS=Homo sapiens GN=HNRNPR PE=1 SV=1	1436.13	38.55	1	15	21	43	8.97469e+09	70.8993
UniProtKB:P08865	40S ribosomal protein SA OS=Homo sapiens GN=RPSA PE=1 SV=4	1435.79	63.05	1	15	15	47	6.76699e+10	32.8334
UniProtKB:P51858	Hepatoma-derived growth factor OS=Homo sapiens GN=HDGF PE=1 SV=1	1434.08	72.08	1	18	18	49	1.40585e+10	26.7719
UniProtKB:P55884	Eukaryotic translation initiation factor 3 subunit B OS=Homo sapiens GN=EIF3B PE=1 SV=3	1428.15	40.42	1	26	26	50	7217635092	92.4238
UniProtKB:P55265	Double-stranded RNA-specific adenosine deaminase OS=Homo sapiens GN=ADAR PE=1 SV=4	1427.7	30.26	1	30	30	41	4551794604	135.981
UniProtKB:Q1KMD3	Heterogeneous nuclear ribonucleoprotein U-like protein 2 OS=Homo sapiens GN=HNRNPUL2 PE=1 SV=1	1425.98	42.03	1	26	26	43	3.51871e+09	85.0522
UniProtKB:Q8TEX9	Importin-4 OS=Homo sapiens GN=IPO4 PE=1 SV=2	1424.15	36.17	1	31	31	44	3.39858e+09	118.64
UniProtKB:O43719	HIV Tat-specific factor 1 OS=Homo sapiens GN=HTATSF1 PE=1 SV=1	1422.07	30.6	1	18	18	36	3.30243e+09	85.8006
UniProtKB:Q4VCS5	Angiomotin OS=Homo sapiens GN=AMOT PE=1 SV=1	1420.91	40.59	1	32	33	49	6092171064	118.013
UniProtKB:P05198	Eukaryotic translation initiation factor 2 subunit 1 OS=Homo sapiens GN=EIF2S1 PE=1 SV=3	1416.99	63.17	1	19	19	34	7999412693	36.0894
UniProtKB:Q13409	Cytoplasmic dynein 1 intermediate chain 2 OS=Homo sapiens GN=DYNC1I2 PE=1 SV=3	1413.88	36.83	1	16	16	32	5009240648	71.4121
UniProtKB:P25789	Proteasome subunit alpha type-4 OS=Homo sapiens GN=PSMA4 PE=1 SV=1	1410.88	58.62	1	12	12	33	7.28688e+09	29.4652
UniProtKB:P29692	Elongation factor 1-delta OS=Homo sapiens GN=EEF1D PE=1 SV=5	1408.48	62.63	1	13	15	38	29957638668	31.1028
UniProtKB:Q9Y2X3	Nucleolar protein 58 OS=Homo sapiens GN=NOP58 PE=1 SV=1	1408.48	41.59	1	18	18	42	5.92434e+09	59.5405
UniProtKB:Q8WUM0	Nuclear pore complex protein Nup133 OS=Homo sapiens GN=NUP133 PE=1 SV=2	1407.5	31.75	1	26	26	36	2421003160	128.898
UniProtKB:P02545	Prelamin-A/C OS=Homo sapiens GN=LMNA PE=1 SV=1	1403.18	50.15	1	28	29	50	5.90167e+09	74.0947
UniProtKB:P17980	26S protease regulatory subunit 6A OS=Homo sapiens GN=PSMC3 PE=1 SV=3	1398.76	60.82	1	21	21	39	6.50948e+09	49.1725
UniProtKB:P43246	DNA mismatch repair protein Msh2 OS=Homo sapiens GN=MSH2 PE=1 SV=1	1391.66	33.19	1	27	27	46	4285369080	104.677
UniProtKB:P62701	40S ribosomal protein S4, X isoform OS=Homo sapiens GN=RPS4X PE=1 SV=2	1388.44	65.02	1	11	21	62	2.55424e+10	29.5791
UniProtKB:Q7KZ85	Transcription elongation factor SPT6 OS=Homo sapiens GN=SUPT6H PE=1 SV=2	1385.24	26.01	1	31	31	40	1683483956	198.949
UniProtKB:Q9Y262	Eukaryotic translation initiation factor 3 subunit L OS=Homo sapiens GN=EIF3L PE=1 SV=1	1384.36	50	1	24	24	45	6.88412e+09	66.6844
UniProtKB:P23396	40S ribosomal protein S3 OS=Homo sapiens GN=RPS3 PE=1 SV=2	1382.94	80.66	1	23	23	73	23773885536	26.6714
UniProtKB:Q14789	Golgin subfamily B member 1 OS=Homo sapiens GN=GOLGB1 PE=1 SV=2	1380.69	13.22	1	31	31	40	1.02603e+09	375.79
UniProtKB:A6NKZ8	Putative tubulin beta chain-like protein ENSP00000290377 OS=Homo sapiens PE=5 SV=2	1380.2	11.56	1	0	6	69	1.16572e+11	41.7481
UniProtKB:Q14157	Ubiquitin-associated protein 2-like OS=Homo sapiens GN=UBAP2L PE=1 SV=2	1378.2	30.91	1	19	19	36	5.1412e+09	114.465
UniProtKB:O76021	Ribosomal L1 domain-containing protein 1 OS=Homo sapiens GN=RSL1D1 PE=1 SV=3	1374.31	43.06	1	17	17	40	12106500946	54.9389
UniProtKB:Q92973	Transportin-1 OS=Homo sapiens GN=TNPO1 PE=1 SV=2	1372.33	35.86	1	20	23	40	4.76285e+09	102.289
UniProtKB:P62306	Small nuclear ribonucleoprotein F OS=Homo sapiens GN=SNRPF PE=1 SV=1	1368.23	39.53	1	3	3	29	9706249075	9.71878
UniProtKB:P33176	Kinesin-1 heavy chain OS=Homo sapiens GN=KIF5B PE=1 SV=1	1360.41	34.06	1	16	22	32	1.57804e+09	109.617
UniProtKB:P62136	Serine/threonine-protein phosphatase PP1-alpha catalytic subunit OS=Homo sapiens GN=PPP1CA PE=1 SV=1	1353.89	63.64	1	5	18	42	1.02939e+10	37.4878
UniProtKB:Q8WUM4	Programmed cell death 6-interacting protein OS=Homo sapiens GN=PDCD6IP PE=1 SV=1	1351.63	45.97	1	34	34	50	7377741227	95.9631
UniProtKB:O60841	Eukaryotic translation initiation factor 5B OS=Homo sapiens GN=EIF5B PE=1 SV=4	1344.77	28.69	1	29	29	42	4.96062e+09	138.742
UniProtKB:Q96P70	Importin-9 OS=Homo sapiens GN=IPO9 PE=1 SV=3	1341.65	27.95	1	19	19	33	5064449891	115.889
UniProtKB:P05386	60S acidic ribosomal protein P1 OS=Homo sapiens GN=RPLP1 PE=1 SV=1	1340.26	74.56	1	3	3	27	2.51351e+10	11.5067
UniProtKB:P25705	ATP synthase subunit alpha, mitochondrial OS=Homo sapiens GN=ATP5A1 PE=1 SV=1	1338.08	45.75	1	21	21	35	8817789619	59.7136
UniProtKB:Q99459	Cell division cycle 5-like protein OS=Homo sapiens GN=CDC5L PE=1 SV=2	1333.12	43.14	1	23	23	34	1.67182e+09	92.1937
UniProtKB:P46782	40S ribosomal protein S5 OS=Homo sapiens GN=RPS5 PE=1 SV=4	1319.89	44.61	1	10	10	36	2.53467e+10	22.8621
UniProtKB:P08133	Annexin A6 OS=Homo sapiens GN=ANXA6 PE=1 SV=3	1318.34	55.13	1	33	33	50	8.30352e+09	75.8256
UniProtKB:P09104	Gamma-enolase OS=Homo sapiens GN=ENO2 PE=1 SV=3	1314.15	57.37	1	10	17	37	2.90738e+10	47.239
UniProtKB:P35232	Prohibitin OS=Homo sapiens GN=PHB PE=1 SV=1	1308.68	81.62	1	18	18	38	1.51777e+10	29.7859
UniProtKB:P60891	Ribose-phosphate pyrophosphokinase 1 OS=Homo sapiens GN=PRPS1 PE=1 SV=2	1302.93	68.24	1	5	15	39	14214877248	34.8119
UniProtKB:Q12888	Tumor suppressor p53-binding protein 1 OS=Homo sapiens GN=TP53BP1 PE=1 SV=2	1300.04	20.64	1	26	26	38	1.35419e+09	213.443
UniProtKB:Q9Y3I0	UPF0027 protein C22orf28 OS=Homo sapiens GN=C22orf28 PE=1 SV=1	1298.69	55.05	1	23	23	44	8.12708e+09	55.1749
UniProtKB:Q71UI9	Histone H2A.V OS=Homo sapiens GN=H2AFV PE=1 SV=3	1297.06	53.91	1	0	5	152	2.15223e+11	13.5005
UniProtKB:P0C0S5	Histone H2A.Z OS=Homo sapiens GN=H2AFZ PE=1 SV=2	1297.06	53.91	1	0	5	152	2.15223e+11	13.5446
UniProtKB:P07355	Annexin A2 OS=Homo sapiens GN=ANXA2 PE=1 SV=2	1287.79	60.47	1	4	19	41	8.70837e+09	38.5798
UniProtKB:P23381	Tryptophanyl-tRNA synthetase, cytoplasmic OS=Homo sapiens GN=WARS PE=1 SV=2	1286.92	48.2	1	15	15	30	5902109776	53.1316
UniProtKB:Q8N163	Protein KIAA1967 OS=Homo sapiens GN=KIAA1967 PE=1 SV=2	1286.51	25.46	1	19	19	31	5750265365	102.838
UniProtKB:P45880	Voltage-dependent anion-selective channel protein 2 OS=Homo sapiens GN=VDAC2 PE=1 SV=2	1283.94	64.63	1	13	13	29	5.8662e+09	31.5465
UniProtKB:P30566	Adenylosuccinate lyase OS=Homo sapiens GN=ADSL PE=1 SV=2	1279.18	45.45	1	14	14	34	7.1205e+09	54.854
UniProtKB:Q13283	Ras GTPase-activating protein-binding protein 1 OS=Homo sapiens GN=G3BP1 PE=1 SV=1	1278.73	41.2	1	15	15	45	6.6497e+09	52.1321
UniProtKB:Q13561	Dynactin subunit 2 OS=Homo sapiens GN=DCTN2 PE=1 SV=4	1277.2	63.59	1	17	17	35	5.39129e+09	44.2039
UniProtKB:P36873	Serine/threonine-protein phosphatase PP1-gamma catalytic subunit OS=Homo sapiens GN=PPP1CC PE=1 SV=1	1276.11	57.89	1	3	16	38	8.58641e+09	36.9597
UniProtKB:P54577	Tyrosyl-tRNA synthetase, cytoplasmic OS=Homo sapiens GN=YARS PE=1 SV=4	1273.56	69.32	1	36	36	60	11618648204	59.1061
UniProtKB:O14744	Protein arginine N-methyltransferase 5 OS=Homo sapiens GN=PRMT5 PE=1 SV=4	1272.93	45.53	1	23	23	43	7.82134e+09	72.6376
UniProtKB:P63010	AP-2 complex subunit beta OS=Homo sapiens GN=AP2B1 PE=1 SV=1	1270.15	41.2	1	16	32	46	6.28792e+09	104.486
UniProtKB:P50570	Dynamin-2 OS=Homo sapiens GN=DNM2 PE=1 SV=2	1268.96	39.54	1	17	29	45	3.34464e+09	98.0032
UniProtKB:Q9ULT8	E3 ubiquitin-protein ligase HECTD1 OS=Homo sapiens GN=HECTD1 PE=1 SV=3	1267.79	14.98	1	26	26	33	1.18037e+09	289.203
UniProtKB:P35241	Radixin OS=Homo sapiens GN=RDX PE=1 SV=1	1267.52	37.05	1	10	24	46	8518879702	68.5214
UniProtKB:Q9BTT0	Acidic leucine-rich nuclear phosphoprotein 32 family member E OS=Homo sapiens GN=ANP32E PE=1 SV=1	1263.72	40.3	1	7	7	27	1.42419e+10	30.6738
UniProtKB:P27797	Calreticulin OS=Homo sapiens GN=CALR PE=1 SV=1	1262.93	52.52	1	14	14	36	2.65357e+10	48.1118
UniProtKB:P13929	Beta-enolase OS=Homo sapiens GN=ENO3 PE=1 SV=4	1261.14	20.74	1	0	7	30	5.55218e+10	46.9023
UniProtKB:Q9H853	Putative tubulin-like protein alpha-4B OS=Homo sapiens GN=TUBA4B PE=5 SV=2	1260.59	10.79	1	0	2	35	8.05892e+10	27.5337
UniProtKB:Q15424	Scaffold attachment factor B1 OS=Homo sapiens GN=SAFB PE=1 SV=4	1257.98	27.98	1	14	24	38	5358623918	102.58
UniProtKB:O15523	ATP-dependent RNA helicase DDX3Y OS=Homo sapiens GN=DDX3Y PE=1 SV=2	1257.7	35	1	0	21	48	1.11792e+10	73.1081
UniProtKB:O76094	Signal recognition particle 72 kDa protein OS=Homo sapiens GN=SRP72 PE=1 SV=3	1247.95	45.01	1	23	23	38	4.99082e+09	74.56
UniProtKB:P55786	Puromycin-sensitive aminopeptidase OS=Homo sapiens GN=NPEPPS PE=1 SV=2	1247.22	46.68	1	23	34	49	7.14052e+09	103.211
UniProtKB:A0AVT1	Ubiquitin-like modifier-activating enzyme 6 OS=Homo sapiens GN=UBA6 PE=1 SV=1	1241.42	32.51	1	23	23	34	1.7624e+09	117.895
UniProtKB:Q8N1F7	Nuclear pore complex protein Nup93 OS=Homo sapiens GN=NUP93 PE=1 SV=2	1239.19	39.56	1	29	29	40	3042484024	93.4296
UniProtKB:P99999	Cytochrome c OS=Homo sapiens GN=CYCS PE=1 SV=2	1229.64	56.19	1	5	7	28	1.28101e+10	11.7411
UniProtKB:Q9UKV3	Apoptotic chromatin condensation inducer in the nucleus OS=Homo sapiens GN=ACIN1 PE=1 SV=2	1229.64	26.92	1	26	26	38	2.73962e+09	151.771
UniProtKB:Q32MZ4	Leucine-rich repeat flightless-interacting protein 1 OS=Homo sapiens GN=LRRFIP1 PE=1 SV=2	1229.3	26.11	1	15	16	30	2.39421e+09	89.1987
UniProtKB:Q08J23	tRNA (cytosine-5-)-methyltransferase NSUN2 OS=Homo sapiens GN=NSUN2 PE=1 SV=2	1228.86	40.94	1	22	22	34	3.06761e+09	86.4158
UniProtKB:P35637	RNA-binding protein FUS OS=Homo sapiens GN=FUS PE=1 SV=1	1228.23	22.81	1	8	10	33	3.6837e+10	53.3938
UniProtKB:Q9NZI8	Insulin-like growth factor 2 mRNA-binding protein 1 OS=Homo sapiens GN=IGF2BP1 PE=1 SV=2	1224	41.94	1	20	21	37	1.46845e+10	63.4412
UniProtKB:O60361	Putative nucleoside diphosphate kinase OS=Homo sapiens GN=NME2P1 PE=5 SV=1	1220.74	59.85	1	1	7	36	6.58464e+10	15.519
UniProtKB:Q9UBE0	SUMO-activating enzyme subunit 1 OS=Homo sapiens GN=SAE1 PE=1 SV=1	1219.25	61.27	1	19	19	37	4.91008e+09	38.4256
UniProtKB:P62140	Serine/threonine-protein phosphatase PP1-beta catalytic subunit OS=Homo sapiens GN=PPP1CB PE=1 SV=3	1218.83	57.49	1	6	16	38	9.83619e+09	37.1626
UniProtKB:P62424	60S ribosomal protein L7a OS=Homo sapiens GN=RPL7A PE=1 SV=2	1216.93	47.74	1	15	15	43	4.83242e+10	29.977
UniProtKB:Q04760	Lactoylglutathione lyase OS=Homo sapiens GN=GLO1 PE=1 SV=4	1216.5	66.85	1	10	10	39	40634159389	20.7642
UniProtKB:P07741	Adenine phosphoribosyltransferase OS=Homo sapiens GN=APRT PE=1 SV=2	1216.3	52.22	1	6	6	20	4.24553e+09	19.5954
UniProtKB:P18583	Protein SON OS=Homo sapiens GN=SON PE=1 SV=4	1215.84	17.56	1	27	27	45	3.7543e+09	263.664
UniProtKB:O60271	C-Jun-amino-terminal kinase-interacting protein 4 OS=Homo sapiens GN=SPAG9 PE=1 SV=4	1215.77	26.04	1	25	26	40	1933789377	146.115
UniProtKB:P18754	Regulator of chromosome condensation OS=Homo sapiens GN=RCC1 PE=1 SV=1	1212.27	54.63	1	17	17	33	4.97442e+09	44.9406
UniProtKB:P24534	Elongation factor 1-beta OS=Homo sapiens GN=EEF1B2 PE=1 SV=3	1208.31	57.78	1	8	10	30	2.24785e+10	24.7483
UniProtKB:P30154	Serine/threonine-protein phosphatase 2A 65 kDa regulatory subunit A beta isoform OS=Homo sapiens GN=PPP2R1B PE=1 SV=3	1206.69	27.95	1	6	13	30	7.17841e+09	66.1715
UniProtKB:Q6P2E9	Enhancer of mRNA-decapping protein 4 OS=Homo sapiens GN=EDC4 PE=1 SV=1	1202.13	25.91	1	23	23	33	4.18511e+09	151.567
UniProtKB:O60506	Heterogeneous nuclear ribonucleoprotein Q OS=Homo sapiens GN=SYNCRIP PE=1 SV=2	1201.6	39.33	1	15	21	39	7.35745e+09	69.5596
UniProtKB:P61163	Alpha-centractin OS=Homo sapiens GN=ACTR1A PE=1 SV=1	1195.64	52.39	1	8	15	35	7732299905	42.5869
UniProtKB:Q03252	Lamin-B2 OS=Homo sapiens GN=LMNB2 PE=1 SV=3	1195.07	44.67	1	22	26	48	5.12574e+09	67.6475
UniProtKB:P42166	Lamina-associated polypeptide 2, isoform alpha OS=Homo sapiens GN=TMPO PE=1 SV=2	1193.92	45.39	1	14	22	33	2.31636e+09	75.4456
UniProtKB:P21796	Voltage-dependent anion-selective channel protein 1 OS=Homo sapiens GN=VDAC1 PE=1 SV=2	1193.04	70.32	1	15	15	26	7492676244	30.7536
UniProtKB:A5YKK6	CCR4-NOT transcription complex subunit 1 OS=Homo sapiens GN=CNOT1 PE=1 SV=2	1187.17	21.89	1	36	36	43	1.38882e+09	266.768
UniProtKB:P35749	Myosin-11 OS=Homo sapiens GN=MYH11 PE=1 SV=3	1186.11	7.76	1	0	15	32	8910020996	227.199
UniProtKB:Q06830	Peroxiredoxin-1 OS=Homo sapiens GN=PRDX1 PE=1 SV=1	1182.5	69.85	1	12	14	76	8.4892e+10	22.0963
UniProtKB:Q9Y265	RuvB-like 1 OS=Homo sapiens GN=RUVBL1 PE=1 SV=1	1180.65	57.68	1	19	19	37	1.16937e+10	50.1963
UniProtKB:P20290	Transcription factor BTF3 OS=Homo sapiens GN=BTF3 PE=1 SV=1	1177.91	69.9	1	10	12	24	1.11573e+10	22.1544
UniProtKB:O00567	Nucleolar protein 56 OS=Homo sapiens GN=NOP56 PE=1 SV=4	1175.3	39.23	1	18	18	36	2.99771e+09	66.0087
UniProtKB:P13637	Sodium/potassium-transporting ATPase subunit alpha-3 OS=Homo sapiens GN=ATP1A3 PE=1 SV=3	1171.33	16.09	1	0	12	28	7.45364e+09	111.677
UniProtKB:Q15019	Septin-2 OS=Homo sapiens GN=SEPT2 PE=1 SV=1	1169.63	61.5	1	16	17	31	5.996e+09	41.4613
UniProtKB:P62195	26S protease regulatory subunit 8 OS=Homo sapiens GN=PSMC5 PE=1 SV=1	1167.83	51.23	1	18	18	34	5.98785e+09	45.5971
UniProtKB:Q9BWF3	RNA-binding protein 4 OS=Homo sapiens GN=RBM4 PE=1 SV=1	1167.79	54.95	1	6	18	32	5754725381	40.2887
UniProtKB:O43143	Putative pre-mRNA-splicing factor ATP-dependent RNA helicase DHX15 OS=Homo sapiens GN=DHX15 PE=1 SV=2	1165.51	36.86	1	26	27	56	5571950012	90.8752
UniProtKB:O75179	Ankyrin repeat domain-containing protein 17 OS=Homo sapiens GN=ANKRD17 PE=1 SV=3	1165.14	14.06	1	14	25	34	1.70744e+09	274.088
UniProtKB:Q14690	Protein RRP5 homolog OS=Homo sapiens GN=PDCD11 PE=1 SV=3	1159.45	24.32	1	36	36	47	1.49187e+09	208.57
UniProtKB:O43491	Band 4.1-like protein 2 OS=Homo sapiens GN=EPB41L2 PE=1 SV=1	1157.9	33.03	1	27	28	47	3.81744e+09	112.519
UniProtKB:Q14166	Tubulin--tyrosine ligase-like protein 12 OS=Homo sapiens GN=TTLL12 PE=1 SV=2	1157.08	50.78	1	21	21	32	3.58183e+09	74.356
UniProtKB:P00492	Hypoxanthine-guanine phosphoribosyltransferase OS=Homo sapiens GN=HPRT1 PE=1 SV=2	1153.51	79.36	1	12	13	37	1.41301e+10	24.5636
UniProtKB:Q86Y56	HEAT repeat-containing protein 2 OS=Homo sapiens GN=HEATR2 PE=1 SV=3	1152.82	38.95	1	26	26	37	2.33402e+09	93.4341
UniProtKB:P54819	Adenylate kinase 2, mitochondrial OS=Homo sapiens GN=AK2 PE=1 SV=2	1150.72	72.38	1	18	18	40	7.80873e+09	26.4608
UniProtKB:Q14315	Filamin-C OS=Homo sapiens GN=FLNC PE=1 SV=3	1148.56	13.39	1	18	31	40	5403284730	290.841
UniProtKB:Q8WVM8	Sec1 family domain-containing protein 1 OS=Homo sapiens GN=SCFD1 PE=1 SV=4	1147.28	40.5	1	17	17	25	1.73155e+09	72.3341
UniProtKB:P23284	Peptidyl-prolyl cis-trans isomerase B OS=Homo sapiens GN=PPIB PE=1 SV=2	1147.08	57.87	1	14	14	36	6.43841e+09	23.7275
UniProtKB:O43592	Exportin-T OS=Homo sapiens GN=XPOT PE=1 SV=2	1145.38	28.38	1	20	20	29	2753106993	109.893
UniProtKB:O14818	Proteasome subunit alpha type-7 OS=Homo sapiens GN=PSMA7 PE=1 SV=1	1144.1	60.89	1	7	12	30	6.11999e+09	27.8696
UniProtKB:P62495	Eukaryotic peptide chain release factor subunit 1 OS=Homo sapiens GN=ETF1 PE=1 SV=3	1142.11	45.08	1	17	17	32	4.36797e+09	49.0002
UniProtKB:O75083	WD repeat-containing protein 1 OS=Homo sapiens GN=WDR1 PE=1 SV=4	1141.04	50.33	1	21	21	30	3.7515e+09	66.1519
UniProtKB:Q08945	FACT complex subunit SSRP1 OS=Homo sapiens GN=SSRP1 PE=1 SV=1	1140.51	40.62	1	25	25	46	1.37003e+10	81.0244
UniProtKB:Q99729	Heterogeneous nuclear ribonucleoprotein A/B OS=Homo sapiens GN=HNRNPAB PE=1 SV=2	1139.05	24.1	1	9	10	73	1.62794e+10	36.2024
UniProtKB:O15371	Eukaryotic translation initiation factor 3 subunit D OS=Homo sapiens GN=EIF3D PE=1 SV=1	1138.43	38.32	1	16	16	26	4243059499	63.9324
UniProtKB:Q9HB71	Calcyclin-binding protein OS=Homo sapiens GN=CACYBP PE=1 SV=2	1138.42	57.89	1	15	15	40	1.00555e+10	26.1936
UniProtKB:P62241	40S ribosomal protein S8 OS=Homo sapiens GN=RPS8 PE=1 SV=2	1137.43	59.62	1	14	14	46	4.16058e+10	24.1902
UniProtKB:O15355	Protein phosphatase 1G OS=Homo sapiens GN=PPM1G PE=1 SV=1	1136.78	45.79	1	18	18	33	5.20522e+09	59.2347
UniProtKB:P50993	Sodium/potassium-transporting ATPase subunit alpha-2 OS=Homo sapiens GN=ATP1A2 PE=1 SV=1	1136.17	15.59	1	0	12	27	6.41346e+09	112.193
UniProtKB:Q9UNS2	COP9 signalosome complex subunit 3 OS=Homo sapiens GN=COPS3 PE=1 SV=3	1136.14	46.34	1	14	14	27	4.34886e+09	47.842
UniProtKB:Q8IY81	Putative rRNA methyltransferase 3 OS=Homo sapiens GN=FTSJ3 PE=1 SV=2	1135.7	24.68	1	15	15	26	4192807630	96.4992
UniProtKB:Q96QV6	Histone H2A type 1-A OS=Homo sapiens GN=HIST1H2AA PE=1 SV=3	1135.59	35.88	1	0	6	155	221050775058	14.2249
UniProtKB:P16104	Histone H2A.x OS=Homo sapiens GN=H2AFX PE=1 SV=2	1135.59	32.87	1	0	6	155	221050775058	15.1354
UniProtKB:Q06210	Glucosamine--fructose-6-phosphate aminotransferase [isomerizing] 1 OS=Homo sapiens GN=GFPT1 PE=1 SV=3	1132.76	41.34	1	22	24	35	2.31451e+09	78.7563
UniProtKB:P30084	Enoyl-CoA hydratase, mitochondrial OS=Homo sapiens GN=ECHS1 PE=1 SV=4	1130.52	56.9	1	14	14	29	5.95392e+09	31.3671
UniProtKB:P15531	Nucleoside diphosphate kinase A OS=Homo sapiens GN=NME1 PE=1 SV=1	1128.27	64.47	1	5	8	41	76814118412	17.1377
UniProtKB:O75153	Protein KIAA0664 OS=Homo sapiens GN=KIAA0664 PE=1 SV=2	1126.96	25.97	1	24	25	34	2.12233e+09	146.577
UniProtKB:P02786	Transferrin receptor protein 1 OS=Homo sapiens GN=TFRC PE=1 SV=2	1125.79	33.55	1	20	20	30	3.67638e+09	84.8179
UniProtKB:P55036	26S proteasome non-ATPase regulatory subunit 4 OS=Homo sapiens GN=PSMD4 PE=1 SV=1	1125.18	40.32	1	9	10	21	6.18924e+09	40.7112
UniProtKB:P28482	Mitogen-activated protein kinase 1 OS=Homo sapiens GN=MAPK1 PE=1 SV=3	1124.29	43.06	1	7	13	31	6415967112	41.3632
UniProtKB:P28838	Cytosol aminopeptidase OS=Homo sapiens GN=LAP3 PE=1 SV=3	1123.05	43.35	1	18	18	30	3.03017e+09	56.1308
UniProtKB:CON_P35527	Tax_Id=9606 Gene_Symbol=KRT9 Keratin, type I cytoskeletal 9	1120.19	32.58	1	0	14	24	1.63146e+09	62.0919
UniProtKB:P35527	Keratin, type I cytoskeletal 9 OS=Homo sapiens GN=KRT9 PE=1 SV=3	1120.19	32.58	1	0	14	24	1.63146e+09	62.0268
UniProtKB:O76003	Glutaredoxin-3 OS=Homo sapiens GN=GLRX3 PE=1 SV=2	1120.05	50.15	1	14	14	29	7.24166e+09	37.4082
UniProtKB:P35606	Coatomer subunit beta' OS=Homo sapiens GN=COPB2 PE=1 SV=2	1118.97	38.52	1	25	25	42	4.30392e+09	102.422
UniProtKB:P51659	Peroxisomal multifunctional enzyme type 2 OS=Homo sapiens GN=HSD17B4 PE=1 SV=3	1116.02	48.91	1	25	25	36	3.79463e+09	79.6363
UniProtKB:Q9Y230	RuvB-like 2 OS=Homo sapiens GN=RUVBL2 PE=1 SV=3	1115.45	49.24	1	22	22	37	8674413336	51.1246
UniProtKB:Q9Y383	Putative RNA-binding protein Luc7-like 2 OS=Homo sapiens GN=LUC7L2 PE=1 SV=2	1113.79	38.52	1	9	14	45	1.14139e+10	46.4856
UniProtKB:P61289	Proteasome activator complex subunit 3 OS=Homo sapiens GN=PSME3 PE=1 SV=1	1108.34	40.94	1	12	12	31	7.18022e+09	29.4876
UniProtKB:P23588	Eukaryotic translation initiation factor 4B OS=Homo sapiens GN=EIF4B PE=1 SV=2	1103.46	33.72	1	20	20	37	5482330908	69.1103
UniProtKB:P31942	Heterogeneous nuclear ribonucleoprotein H3 OS=Homo sapiens GN=HNRNPH3 PE=1 SV=2	1100.51	47.98	1	10	11	27	9416410231	36.9031
UniProtKB:Q15084	Protein disulfide-isomerase A6 OS=Homo sapiens GN=PDIA6 PE=1 SV=1	1099.86	39.77	1	14	14	33	2.45458e+10	48.0913
UniProtKB:Q9NTJ3	Structural maintenance of chromosomes protein 4 OS=Homo sapiens GN=SMC4 PE=1 SV=2	1099.37	25.08	1	30	30	38	3054511338	147.091
UniProtKB:Q9P2E9	Ribosome-binding protein 1 OS=Homo sapiens GN=RRBP1 PE=1 SV=4	1098.28	17.66	1	20	20	30	1.3303e+09	152.381
UniProtKB:O75131	Copine-3 OS=Homo sapiens GN=CPNE3 PE=1 SV=1	1096.81	41.9	1	17	18	32	9.4597e+09	60.0921
UniProtKB:O75821	Eukaryotic translation initiation factor 3 subunit G OS=Homo sapiens GN=EIF3G PE=1 SV=2	1094.72	43.13	1	12	12	32	8.18771e+09	35.5889
UniProtKB:Q14103	Heterogeneous nuclear ribonucleoprotein D0 OS=Homo sapiens GN=HNRNPD PE=1 SV=1	1092.8	39.72	1	14	16	42	9.28274e+09	38.4103
UniProtKB:Q12788	Transducin beta-like protein 3 OS=Homo sapiens GN=TBL3 PE=1 SV=2	1090.55	43.69	1	22	22	31	2849910883	88.9785
UniProtKB:O95232	Luc7-like protein 3 OS=Homo sapiens GN=LUC7L3 PE=1 SV=2	1087.81	29.4	1	15	15	24	6.76436e+09	51.4351
UniProtKB:Q8N8S7	Protein enabled homolog OS=Homo sapiens GN=ENAH PE=1 SV=2	1085.92	31.13	1	12	13	27	4.39176e+09	66.4699
UniProtKB:O43776	Asparaginyl-tRNA synthetase, cytoplasmic OS=Homo sapiens GN=NARS PE=1 SV=1	1084.93	40.88	1	20	20	31	6539637676	62.9025
UniProtKB:O00267	Transcription elongation factor SPT5 OS=Homo sapiens GN=SUPT5H PE=1 SV=1	1082.07	27.23	1	19	19	30	1.9396e+09	120.925
UniProtKB:P26196	Probable ATP-dependent RNA helicase DDX6 OS=Homo sapiens GN=DDX6 PE=1 SV=2	1080.43	46.79	1	17	17	26	5.91505e+09	54.3823
UniProtKB:P52732	Kinesin-like protein KIF11 OS=Homo sapiens GN=KIF11 PE=1 SV=2	1078.41	29.17	1	26	26	36	2046464595	119.085
UniProtKB:P61247	40S ribosomal protein S3a OS=Homo sapiens GN=RPS3A PE=1 SV=2	1076.97	56.06	1	21	21	57	3.00242e+10	29.9257
UniProtKB:Q13185	Chromobox protein homolog 3 OS=Homo sapiens GN=CBX3 PE=1 SV=4	1076.44	63.39	1	7	9	26	1.69925e+10	20.7984
UniProtKB:CON_Q3ZBD7	(Bos taurus) Glucose-6-phosphate isomerase	1074.66	12.21	1	0	5	22	9.31774e+09	62.831
UniProtKB:P09429	High mobility group protein B1 OS=Homo sapiens GN=HMGB1 PE=1 SV=3	1074.36	38.6	1	4	15	42	23755102483	24.8782
UniProtKB:O60664	Perilipin-3 OS=Homo sapiens GN=PLIN3 PE=1 SV=2	1071.75	48.85	1	14	14	26	8.91868e+09	47.0179
UniProtKB:Q92900	Regulator of nonsense transcripts 1 OS=Homo sapiens GN=UPF1 PE=1 SV=2	1070.35	33.3	1	29	29	42	3898387411	124.267
UniProtKB:Q8IWZ3	Ankyrin repeat and KH domain-containing protein 1 OS=Homo sapiens GN=ANKHD1 PE=1 SV=1	1070.09	11.25	1	9	20	26	1.70744e+09	269.291
UniProtKB:Q9UJU6	Drebrin-like protein OS=Homo sapiens GN=DBNL PE=1 SV=1	1062.55	39.3	1	13	13	24	3.828e+09	48.1776
UniProtKB:P04264	Keratin, type II cytoskeletal 1 OS=Homo sapiens GN=KRT1 PE=1 SV=6	1062.2	33.07	1	1	19	29	4842689638	65.999
UniProtKB:P35998	26S protease regulatory subunit 7 OS=Homo sapiens GN=PSMC2 PE=1 SV=3	1059.71	50.58	1	21	21	38	4610506056	48.6031
UniProtKB:Q9H361	Polyadenylate-binding protein 3 OS=Homo sapiens GN=PABPC3 PE=1 SV=2	1059.68	18.07	1	0	14	40	2.63062e+10	69.9867
UniProtKB:P52907	F-actin-capping protein subunit alpha-1 OS=Homo sapiens GN=CAPZA1 PE=1 SV=3	1059.13	52.8	1	8	9	29	1.41227e+10	32.9023
UniProtKB:P14868	Aspartyl-tRNA synthetase, cytoplasmic OS=Homo sapiens GN=DARS PE=1 SV=2	1059.13	45.51	1	21	21	39	6.4089e+09	57.1
UniProtKB:Q9UBB4	Ataxin-10 OS=Homo sapiens GN=ATXN10 PE=1 SV=1	1056.57	45.89	1	18	18	34	5028071446	53.4548
UniProtKB:P52701	DNA mismatch repair protein Msh6 OS=Homo sapiens GN=MSH6 PE=1 SV=2	1054.49	32.94	1	31	31	39	4.42634e+09	152.689
UniProtKB:P26368	Splicing factor U2AF 65 kDa subunit OS=Homo sapiens GN=U2AF2 PE=1 SV=4	1054.4	41.47	1	10	10	35	19262207236	53.4672
UniProtKB:P51610	Host cell factor 1 OS=Homo sapiens GN=HCFC1 PE=1 SV=2	1050.5	25.01	1	31	32	40	3805070162	208.602
UniProtKB:P10599	Thioredoxin OS=Homo sapiens GN=TXN PE=1 SV=3	1048.82	79.05	1	7	7	32	1.2197e+10	11.7297
UniProtKB:Q96QK1	Vacuolar protein sorting-associated protein 35 OS=Homo sapiens GN=VPS35 PE=1 SV=2	1047.55	31.78	1	21	21	37	4.14512e+09	91.6489
UniProtKB:P09622	Dihydrolipoyl dehydrogenase, mitochondrial OS=Homo sapiens GN=DLD PE=1 SV=2	1047.32	34.58	1	13	13	26	5.70844e+09	54.143
UniProtKB:P51003	Poly(A) polymerase alpha OS=Homo sapiens GN=PAPOLA PE=1 SV=4	1046.93	31.54	1	10	15	25	1.8219e+09	82.791
UniProtKB:Q9BQ52	Zinc phosphodiesterase ELAC protein 2 OS=Homo sapiens GN=ELAC2 PE=1 SV=2	1042.22	31.36	1	15	15	23	3.93192e+09	92.1602
UniProtKB:P32969	60S ribosomal protein L9 OS=Homo sapiens GN=RPL9 PE=1 SV=1	1040.35	61.46	1	8	8	27	9.25462e+09	21.8498
UniProtKB:Q9Y224	UPF0568 protein C14orf166 OS=Homo sapiens GN=C14orf166 PE=1 SV=1	1038.96	70.9	1	15	16	30	5.65096e+09	28.0507
UniProtKB:P35658	Nuclear pore complex protein Nup214 OS=Homo sapiens GN=NUP214 PE=1 SV=2	1038.61	15.93	1	21	21	33	2.12241e+09	213.488
UniProtKB:Q8IYB3	Serine/arginine repetitive matrix protein 1 OS=Homo sapiens GN=SRRM1 PE=1 SV=2	1038.11	22.79	1	15	15	34	5905094430	102.274
UniProtKB:Q5VYK3	Proteasome-associated protein ECM29 homolog OS=Homo sapiens GN=ECM29 PE=1 SV=2	1035.36	23.69	1	34	34	43	1.69383e+09	204.16
UniProtKB:Q9H1E3	Nuclear ubiquitous casein and cyclin-dependent kinases substrate OS=Homo sapiens GN=NUCKS1 PE=1 SV=1	1035.17	25.51	1	7	7	37	1.51068e+10	27.28
UniProtKB:P13693	Translationally-controlled tumor protein OS=Homo sapiens GN=TPT1 PE=1 SV=1	1034.18	72.67	1	6	8	32	3.25208e+10	19.5826
UniProtKB:P55196	Afadin OS=Homo sapiens GN=MLLT4 PE=1 SV=3	1033.67	17.32	1	22	22	27	907349618	206.676
UniProtKB:Q01105	Protein SET OS=Homo sapiens GN=SET PE=1 SV=3	1031.77	45.17	1	10	10	30	3.35809e+10	33.4687
UniProtKB:CON_P04264	Tax_Id=9606 Gene_Symbol=KRT1 Keratin, type II cytoskeletal 1	1031.66	31.68	1	0	18	27	4842689638	65.978
UniProtKB:Q16643	Drebrin OS=Homo sapiens GN=DBN1 PE=1 SV=4	1031.1	28.51	1	15	15	27	9.53152e+09	71.3854
UniProtKB:P35221	Catenin alpha-1 OS=Homo sapiens GN=CTNNA1 PE=1 SV=1	1026.46	29.47	1	15	20	27	1.90473e+09	100.009
UniProtKB:O15372	Eukaryotic translation initiation factor 3 subunit H OS=Homo sapiens GN=EIF3H PE=1 SV=1	1026.01	46.59	1	12	12	27	5.73371e+09	39.9051
UniProtKB:O94973	AP-2 complex subunit alpha-2 OS=Homo sapiens GN=AP2A2 PE=1 SV=2	1025.37	32.8	1	13	21	30	2.91389e+09	103.895
UniProtKB:O14654	Insulin receptor substrate 4 OS=Homo sapiens GN=IRS4 PE=1 SV=1	1025.03	22.12	1	19	19	27	2.9658e+09	133.685
UniProtKB:Q9UPN3	Microtubule-actin cross-linking factor 1, isoforms 1/2/3/5 OS=Homo sapiens GN=MACF1 PE=1 SV=3	1021.97	5.16	1	0	19	22	4.60504e+08	620.034
UniProtKB:Q96PK2	Microtubule-actin cross-linking factor 1, isoform 4 OS=Homo sapiens GN=MACF1 PE=1 SV=2	1021.97	4.72	1	0	19	22	4.60504e+08	669.721
UniProtKB:Q2TAY7	WD40 repeat-containing protein SMU1 OS=Homo sapiens GN=SMU1 PE=1 SV=2	1020.12	38.4	1	14	14	27	4.44773e+09	57.5072
UniProtKB:P50502	Hsc70-interacting protein OS=Homo sapiens GN=ST13 PE=1 SV=2	1019.71	29.27	1	1	11	37	2.15333e+10	41.3055
UniProtKB:Q8IUE6	Histone H2A type 2-B OS=Homo sapiens GN=HIST2H2AB PE=1 SV=3	1019.43	36.15	1	1	5	139	1.03973e+11	13.9868
UniProtKB:Q99867	Putative tubulin beta-4q chain OS=Homo sapiens GN=TUBB4Q PE=5 SV=1	1019.39	10.14	1	0	6	51	74763446651	48.4034
UniProtKB:P63220	40S ribosomal protein S21 OS=Homo sapiens GN=RPS21 PE=1 SV=1	1018.48	60.24	1	6	6	23	2.55531e+10	9.10557
UniProtKB:Q9H4A4	Aminopeptidase B OS=Homo sapiens GN=RNPEP PE=1 SV=2	1017.97	43.54	1	21	21	29	2.79963e+09	72.5495
UniProtKB:P35573	Glycogen debranching enzyme OS=Homo sapiens GN=AGL PE=1 SV=3	1015.22	26.31	1	28	28	33	2169433557	174.652
UniProtKB:P17858	6-phosphofructokinase, liver type OS=Homo sapiens GN=PFKL PE=1 SV=6	1015.07	37.82	1	19	22	31	2832308336	84.9642
UniProtKB:P60900	Proteasome subunit alpha type-6 OS=Homo sapiens GN=PSMA6 PE=1 SV=1	1012.41	47.56	1	11	11	29	1.18298e+10	27.3818
UniProtKB:Q09028	Histone-binding protein RBBP4 OS=Homo sapiens GN=RBBP4 PE=1 SV=3	1011.51	46.59	1	8	15	38	2.39439e+10	47.6261
UniProtKB:Q8NBS9	Thioredoxin domain-containing protein 5 OS=Homo sapiens GN=TXNDC5 PE=1 SV=2	1009.39	43.98	1	15	15	26	1.03413e+10	47.5987
UniProtKB:P49454	Centromere protein F OS=Homo sapiens GN=CENPF PE=1 SV=2	1009.07	11.09	1	28	28	31	7.5994e+08	367.537
UniProtKB:Q13347	Eukaryotic translation initiation factor 3 subunit I OS=Homo sapiens GN=EIF3I PE=1 SV=1	1007.78	70.46	1	16	16	34	1.20961e+10	36.4786
UniProtKB:Q9H0A0	N-acetyltransferase 10 OS=Homo sapiens GN=NAT10 PE=1 SV=2	1006.23	21.85	1	17	17	29	1.80734e+09	115.657
UniProtKB:P52209	6-phosphogluconate dehydrogenase, decarboxylating OS=Homo sapiens GN=PGD PE=1 SV=3	1005.12	43.69	1	19	19	33	1.27897e+10	53.106
UniProtKB:P00491	Purine nucleoside phosphorylase OS=Homo sapiens GN=PNP PE=1 SV=2	1003.01	78.89	1	16	16	32	5.62628e+09	32.0972
UniProtKB:P10768	S-formylglutathione hydrolase OS=Homo sapiens GN=ESD PE=1 SV=2	1002.83	74.11	1	14	14	31	5.41181e+09	31.4425
UniProtKB:P00441	Superoxide dismutase [Cu-Zn] OS=Homo sapiens GN=SOD1 PE=1 SV=2	1001.94	53.9	1	5	5	23	50418416208	15.9259
UniProtKB:Q9UNM6	26S proteasome non-ATPase regulatory subunit 13 OS=Homo sapiens GN=PSMD13 PE=1 SV=1	1000.04	66.49	1	20	20	36	4.44767e+09	42.8911
UniProtKB:P06493	Cell division protein kinase 1 OS=Homo sapiens GN=CDK1 PE=1 SV=2	998.365	56.23	1	13	14	30	5.13967e+09	34.0599
UniProtKB:P07339	Cathepsin D OS=Homo sapiens GN=CTSD PE=1 SV=1	996.883	39.08	1	12	12	30	5.81688e+09	44.5236
UniProtKB:Q16576	Histone-binding protein RBBP7 OS=Homo sapiens GN=RBBP7 PE=1 SV=1	996.455	61.65	1	10	16	38	2.15523e+10	47.7902
UniProtKB:P23193	Transcription elongation factor A protein 1 OS=Homo sapiens GN=TCEA1 PE=1 SV=2	994.627	47.51	1	11	13	30	4164745806	33.948
UniProtKB:Q01518	Adenylyl cyclase-associated protein 1 OS=Homo sapiens GN=CAP1 PE=1 SV=5	993.023	40	1	19	20	35	6.47877e+09	51.8687
UniProtKB:Q9NTK5	Obg-like ATPase 1 OS=Homo sapiens GN=OLA1 PE=1 SV=2	992.65	41.16	1	14	14	28	1.13658e+10	44.7153
UniProtKB:P47897	Glutaminyl-tRNA synthetase OS=Homo sapiens GN=QARS PE=1 SV=1	991.679	42.45	1	27	28	37	5.36058e+09	87.7429
UniProtKB:Q9NYF8	Bcl-2-associated transcription factor 1 OS=Homo sapiens GN=BCLAF1 PE=1 SV=2	990.719	25	1	22	23	44	8.06661e+09	106.059
UniProtKB:Q9Y2Z0	Suppressor of G2 allele of SKP1 homolog OS=Homo sapiens GN=SUGT1 PE=1 SV=3	990.701	53.7	1	14	14	24	9.29347e+09	40.9985
UniProtKB:P41250	Glycyl-tRNA synthetase OS=Homo sapiens GN=GARS PE=1 SV=3	988.587	37.89	1	25	25	38	9.77724e+09	83.1126
UniProtKB:P84090	Enhancer of rudimentary homolog OS=Homo sapiens GN=ERH PE=1 SV=1	988.108	43.27	1	4	4	23	2.90669e+10	12.251
UniProtKB:P31689	DnaJ homolog subfamily A member 1 OS=Homo sapiens GN=DNAJA1 PE=1 SV=2	986.955	45.59	1	12	12	27	8095719190	44.8395
UniProtKB:Q8NHW5	60S acidic ribosomal protein P0-like OS=Homo sapiens GN=RPLP0P6 PE=5 SV=1	984.088	31.55	1	0	10	37	25674254572	34.3427
UniProtKB:Q9NVI1	Fanconi anemia group I protein OS=Homo sapiens GN=FANCI PE=1 SV=4	983.783	26.58	1	27	28	35	1966883548	149.229
UniProtKB:Q8TEQ6	Gem-associated protein 5 OS=Homo sapiens GN=GEMIN5 PE=1 SV=3	980.383	24.07	1	24	24	32	1.43205e+09	168.483
UniProtKB:Q9UMX0	Ubiquilin-1 OS=Homo sapiens GN=UBQLN1 PE=1 SV=2	979.457	28.35	1	4	10	23	3.99313e+09	62.4794
UniProtKB:Q9BPX3	Condensin complex subunit 3 OS=Homo sapiens GN=NCAPG PE=1 SV=1	979.124	27	1	22	22	28	3.07275e+09	114.262
UniProtKB:Q07955	Serine/arginine-rich splicing factor 1 OS=Homo sapiens GN=SRSF1 PE=1 SV=2	978.007	52.42	1	16	17	51	14322471967	27.7278
UniProtKB:Q92804	TATA-binding protein-associated factor 2N OS=Homo sapiens GN=TAF15 PE=1 SV=1	976.36	19.43	1	5	7	21	1.45927e+10	61.7931
UniProtKB:Q16555	Dihydropyrimidinase-related protein 2 OS=Homo sapiens GN=DPYSL2 PE=1 SV=1	975.77	47.55	1	14	17	24	2.03858e+09	62.2546
UniProtKB:P62829	60S ribosomal protein L23 OS=Homo sapiens GN=RPL23 PE=1 SV=1	975.49	47.86	1	9	9	27	1.78465e+10	14.8561
UniProtKB:Q9H6Z4	Ran-binding protein 3 OS=Homo sapiens GN=RANBP3 PE=1 SV=1	971.772	31.57	1	14	14	23	3.96501e+09	60.1732
UniProtKB:Q9Y281	Cofilin-2 OS=Homo sapiens GN=CFL2 PE=1 SV=1	966.438	77.71	1	8	14	36	2.74701e+10	18.7249
UniProtKB:P62753	40S ribosomal protein S6 OS=Homo sapiens GN=RPS6 PE=1 SV=1	964.197	34.14	1	9	9	22	2.05426e+10	28.663
UniProtKB:P22307	Non-specific lipid-transfer protein OS=Homo sapiens GN=SCP2 PE=1 SV=2	962.291	22.67	1	12	12	23	2521484189	58.9556
UniProtKB:P18124	60S ribosomal protein L7 OS=Homo sapiens GN=RPL7 PE=1 SV=1	962.042	58.06	1	19	19	42	28250483080	29.2072
UniProtKB:Q8IZL8	Proline-, glutamic acid- and leucine-rich protein 1 OS=Homo sapiens GN=PELP1 PE=1 SV=2	961.709	21.59	1	15	15	28	3.88861e+09	119.624
UniProtKB:P53675	Clathrin heavy chain 2 OS=Homo sapiens GN=CLTCL1 PE=1 SV=2	956.871	11.22	1	0	20	38	1.50049e+10	186.91
UniProtKB:P61204	ADP-ribosylation factor 3 OS=Homo sapiens GN=ARF3 PE=1 SV=2	955.188	67.4	1	0	11	34	1.86787e+10	20.5877
UniProtKB:P84077	ADP-ribosylation factor 1 OS=Homo sapiens GN=ARF1 PE=1 SV=2	955.188	67.4	1	0	11	34	1.86787e+10	20.6837
UniProtKB:P63167	Dynein light chain 1, cytoplasmic OS=Homo sapiens GN=DYNLL1 PE=1 SV=1	954.658	50.56	1	1	4	16	7899125572	10.3591
UniProtKB:Q02878	60S ribosomal protein L6 OS=Homo sapiens GN=RPL6 PE=1 SV=3	954.444	46.88	1	16	16	40	33165621537	32.7076
UniProtKB:O15381	Nuclear valosin-containing protein-like OS=Homo sapiens GN=NVL PE=1 SV=1	953.117	32.48	1	19	19	28	1.0856e+09	94.991
UniProtKB:O95218	Zinc finger Ran-binding domain-containing protein 2 OS=Homo sapiens GN=ZRANB2 PE=1 SV=2	951.787	36.06	1	13	13	21	5899140977	37.382
UniProtKB:P14314	Glucosidase 2 subunit beta OS=Homo sapiens GN=PRKCSH PE=1 SV=2	951.707	31.25	1	16	16	36	1.01477e+10	59.3878
UniProtKB:Q9UNZ2	NSFL1 cofactor p47 OS=Homo sapiens GN=NSFL1C PE=1 SV=2	949.603	46.76	1	12	12	26	3.99575e+09	40.5483
UniProtKB:P25787	Proteasome subunit alpha type-2 OS=Homo sapiens GN=PSMA2 PE=1 SV=2	947.494	51.28	1	7	7	19	3.87227e+09	25.8823
UniProtKB:Q15691	Microtubule-associated protein RP/EB family member 1 OS=Homo sapiens GN=MAPRE1 PE=1 SV=3	947.281	75.75	1	13	16	28	1.06027e+10	29.9802
UniProtKB:Q15427	Splicing factor 3B subunit 4 OS=Homo sapiens GN=SF3B4 PE=1 SV=1	946.793	19.1	1	5	5	21	7.17865e+09	44.3571
UniProtKB:Q12996	Cleavage stimulation factor subunit 3 OS=Homo sapiens GN=CSTF3 PE=1 SV=1	944.827	35.29	1	20	20	26	2.43692e+09	82.8687
UniProtKB:Q99615	DnaJ homolog subfamily C member 7 OS=Homo sapiens GN=DNAJC7 PE=1 SV=2	944.079	46.15	1	20	20	28	3.40683e+09	56.4047
UniProtKB:P60660	Myosin light polypeptide 6 OS=Homo sapiens GN=MYL6 PE=1 SV=2	943.513	66.89	1	7	9	27	2.09793e+10	16.9191
UniProtKB:Q9UNF1	Melanoma-associated antigen D2 OS=Homo sapiens GN=MAGED2 PE=1 SV=2	942.103	32.18	1	11	12	22	2.56355e+09	64.9144
UniProtKB:Q9UHB9	Signal recognition particle 68 kDa protein OS=Homo sapiens GN=SRP68 PE=1 SV=2	941.502	29.67	1	16	16	26	3887476400	70.6856
UniProtKB:Q9BZE4	Nucleolar GTP-binding protein 1 OS=Homo sapiens GN=GTPBP4 PE=1 SV=3	941.052	27.92	1	15	15	26	2.14836e+09	73.9178
UniProtKB:P40855	Peroxisomal biogenesis factor 19 OS=Homo sapiens GN=PEX19 PE=1 SV=1	940.831	34.11	1	7	7	17	3.76413e+09	32.7856
UniProtKB:P62318	Small nuclear ribonucleoprotein Sm D3 OS=Homo sapiens GN=SNRPD3 PE=1 SV=1	940.318	53.17	1	5	5	20	17662680516	13.9073
UniProtKB:Q92922	SWI/SNF complex subunit SMARCC1 OS=Homo sapiens GN=SMARCC1 PE=1 SV=3	939.158	30.86	1	22	27	36	5.81175e+09	122.79
UniProtKB:P45974	Ubiquitin carboxyl-terminal hydrolase 5 OS=Homo sapiens GN=USP5 PE=1 SV=2	937.704	42.89	1	23	25	36	5209092086	95.7253
UniProtKB:P43487	Ran-specific GTPase-activating protein OS=Homo sapiens GN=RANBP1 PE=1 SV=1	935.947	42.79	1	6	7	37	56385361970	23.2956
UniProtKB:Q14126	Desmoglein-2 OS=Homo sapiens GN=DSG2 PE=1 SV=2	933.553	21.47	1	15	15	20	1082891516	122.218
UniProtKB:P28066	Proteasome subunit alpha type-5 OS=Homo sapiens GN=PSMA5 PE=1 SV=3	933.003	65.56	1	12	12	32	19240955997	26.3942
UniProtKB:Q14498	RNA-binding protein 39 OS=Homo sapiens GN=RBM39 PE=1 SV=2	932.933	40.19	1	14	16	26	6851001876	59.3427
UniProtKB:O00231	26S proteasome non-ATPase regulatory subunit 11 OS=Homo sapiens GN=PSMD11 PE=1 SV=3	932.856	49.53	1	19	19	36	5.55986e+09	47.434
UniProtKB:O95163	Elongator complex protein 1 OS=Homo sapiens GN=IKBKAP PE=1 SV=3	930.574	17.27	1	16	16	22	1.52085e+09	150.159
UniProtKB:P62873	Guanine nucleotide-binding protein G(I)/G(S)/G(T) subunit beta-1 OS=Homo sapiens GN=GNB1 PE=1 SV=3	930.217	37.35	1	5	9	19	5.12063e+09	37.353
UniProtKB:P27635	60S ribosomal protein L10 OS=Homo sapiens GN=RPL10 PE=1 SV=4	929.015	51.4	1	6	12	35	3.44336e+10	24.5879
UniProtKB:O00299	Chloride intracellular channel protein 1 OS=Homo sapiens GN=CLIC1 PE=1 SV=4	927.933	78.42	1	15	15	30	1.15057e+10	26.9057
UniProtKB:Q07021	Complement component 1 Q subcomponent-binding protein, mitochondrial OS=Homo sapiens GN=C1QBP PE=1 SV=1	927.872	44.33	1	9	9	26	1.079e+10	31.3426
UniProtKB:Q9BWD1	Acetyl-CoA acetyltransferase, cytosolic OS=Homo sapiens GN=ACAT2 PE=1 SV=2	927.779	56.93	1	12	12	25	8.7745e+09	41.3244
UniProtKB:P10155	60 kDa SS-A/Ro ribonucleoprotein OS=Homo sapiens GN=TROVE2 PE=1 SV=2	927.633	41.08	1	16	16	28	3324992546	60.6312
UniProtKB:Q9UBF2	Coatomer subunit gamma-2 OS=Homo sapiens GN=COPG2 PE=1 SV=1	926.856	29.16	1	16	20	25	3066190112	97.5596
UniProtKB:Q9H3P7	Golgi resident protein GCP60 OS=Homo sapiens GN=ACBD3 PE=1 SV=4	926.594	26.14	1	10	10	19	1.98667e+09	60.556
UniProtKB:P38159	Heterogeneous nuclear ribonucleoprotein G OS=Homo sapiens GN=RBMX PE=1 SV=3	926.239	53.2	1	20	25	52	2.77528e+10	42.3063
UniProtKB:P49006	MARCKS-related protein OS=Homo sapiens GN=MARCKSL1 PE=1 SV=2	926.212	72.31	1	6	6	22	15443307100	19.5172
UniProtKB:Q9Y266	Nuclear migration protein nudC OS=Homo sapiens GN=NUDC PE=1 SV=1	925.177	56.8	1	19	19	39	1.24031e+10	38.2191
UniProtKB:P20042	Eukaryotic translation initiation factor 2 subunit 2 OS=Homo sapiens GN=EIF2S2 PE=1 SV=2	924.894	51.35	1	2	15	28	3.48041e+09	38.3644
UniProtKB:P08243	Asparagine synthetase [glutamine-hydrolyzing] OS=Homo sapiens GN=ASNS PE=1 SV=4	920.177	39.57	1	20	20	34	5796641044	64.3286
UniProtKB:Q9UMS4	Pre-mRNA-processing factor 19 OS=Homo sapiens GN=PRPF19 PE=1 SV=1	919.945	42.06	1	14	14	31	1.09101e+10	55.1463
UniProtKB:O43852	Calumenin OS=Homo sapiens GN=CALU PE=1 SV=2	917.672	47.3	1	11	11	25	4.69549e+09	37.0835
UniProtKB:Q9BT78	COP9 signalosome complex subunit 4 OS=Homo sapiens GN=COPS4 PE=1 SV=1	916.646	48.28	1	14	14	25	2.8397e+09	46.2397
UniProtKB:O43264	Centromere/kinetochore protein zw10 homolog OS=Homo sapiens GN=ZW10 PE=1 SV=3	916.612	31.19	1	17	17	24	1.29955e+09	88.7729
UniProtKB:P41567	Eukaryotic translation initiation factor 1 OS=Homo sapiens GN=EIF1 PE=1 SV=1	915.443	75.22	1	3	7	21	1.95168e+10	12.7246
UniProtKB:P08195	4F2 cell-surface antigen heavy chain OS=Homo sapiens GN=SLC3A2 PE=1 SV=3	915.233	38.25	1	17	18	25	3.82563e+09	67.9517
UniProtKB:O75122	CLIP-associating protein 2 OS=Homo sapiens GN=CLASP2 PE=1 SV=2	908.744	19.47	1	14	16	20	1.35535e+09	141.046
UniProtKB:P16152	Carbonyl reductase [NADPH] 1 OS=Homo sapiens GN=CBR1 PE=1 SV=3	908.185	69.31	1	13	15	29	5150282044	30.3559
UniProtKB:P24752	Acetyl-CoA acetyltransferase, mitochondrial OS=Homo sapiens GN=ACAT1 PE=1 SV=1	908.1	48.71	1	15	15	26	4.54546e+09	45.1706
UniProtKB:P20810	Calpastatin OS=Homo sapiens GN=CAST PE=1 SV=4	906.674	24.72	1	14	14	24	1796074600	76.5263
UniProtKB:O43747	AP-1 complex subunit gamma-1 OS=Homo sapiens GN=AP1G1 PE=1 SV=5	905.02	27.98	1	19	19	31	2.09942e+09	91.2931
UniProtKB:P47756	F-actin-capping protein subunit beta OS=Homo sapiens GN=CAPZB PE=1 SV=4	903.518	61.73	1	14	14	28	6997676137	31.3308
UniProtKB:Q14651	Plastin-1 OS=Homo sapiens GN=PLS1 PE=1 SV=2	901.213	31.96	1	10	15	26	15449141760	70.2093
UniProtKB:Q9Y617	Phosphoserine aminotransferase OS=Homo sapiens GN=PSAT1 PE=1 SV=2	899.139	60.81	1	20	20	32	7.50263e+09	40.3968
UniProtKB:P00918	Carbonic anhydrase 2 OS=Homo sapiens GN=CA2 PE=1 SV=2	898.219	57.69	1	11	11	27	1.19351e+10	29.2279
UniProtKB:Q9H307	Pinin OS=Homo sapiens GN=PNN PE=1 SV=4	896.762	32.08	1	20	20	34	2.76285e+09	81.565
UniProtKB:P22061	Protein-L-isoaspartate(D-aspartate) O-methyltransferase OS=Homo sapiens GN=PCMT1 PE=1 SV=3	895.583	62.11	1	11	11	28	1.17494e+10	24.6346
UniProtKB:Q14683	Structural maintenance of chromosomes protein 1A OS=Homo sapiens GN=SMC1A PE=1 SV=2	895.053	21.65	1	24	24	32	1.44096e+09	143.144
UniProtKB:Q8WWY3	U4/U6 small nuclear ribonucleoprotein Prp31 OS=Homo sapiens GN=PRPF31 PE=1 SV=2	893.385	46.69	1	15	15	20	2.08156e+09	55.4214
UniProtKB:O14929	Histone acetyltransferase type B catalytic subunit OS=Homo sapiens GN=HAT1 PE=1 SV=1	893.28	43.68	1	10	10	20	7.73534e+09	49.4808
UniProtKB:Q12874	Splicing factor 3A subunit 3 OS=Homo sapiens GN=SF3A3 PE=1 SV=1	891.963	41.52	1	18	18	35	5.77733e+09	58.8123
UniProtKB:P41091	Eukaryotic translation initiation factor 2 subunit 3 OS=Homo sapiens GN=EIF2S3 PE=1 SV=3	889.958	48.94	1	3	18	29	6.19992e+09	51.0772
UniProtKB:Q68E01	Integrator complex subunit 3 OS=Homo sapiens GN=INTS3 PE=1 SV=1	887.524	17.16	1	12	12	18	1.89007e+09	117.994
UniProtKB:P61160	Actin-related protein 2 OS=Homo sapiens GN=ACTR2 PE=1 SV=1	886.954	45.18	1	14	14	27	6.28594e+09	44.7322
UniProtKB:Q9P258	Protein RCC2 OS=Homo sapiens GN=RCC2 PE=1 SV=2	884.91	43.87	1	18	18	33	7.24712e+09	56.0492
UniProtKB:P46459	Vesicle-fusing ATPase OS=Homo sapiens GN=NSF PE=1 SV=3	884.443	39.52	1	25	26	37	2861310961	82.5421
UniProtKB:P55010	Eukaryotic translation initiation factor 5 OS=Homo sapiens GN=EIF5 PE=1 SV=2	884.116	43.16	1	17	17	30	6.16019e+09	49.1918
UniProtKB:Q9BUJ2	Heterogeneous nuclear ribonucleoprotein U-like protein 1 OS=Homo sapiens GN=HNRNPUL1 PE=1 SV=2	883.291	24.65	1	16	16	28	7.57224e+09	95.6793
UniProtKB:O43768	Alpha-endosulfine OS=Homo sapiens GN=ENSA PE=1 SV=1	883.006	62.81	1	7	8	33	10327949152	13.3808
UniProtKB:Q96KR1	Zinc finger RNA-binding protein OS=Homo sapiens GN=ZFR PE=1 SV=2	881.189	19.27	1	16	16	23	1.3486e+09	116.939
UniProtKB:P28074	Proteasome subunit beta type-5 OS=Homo sapiens GN=PSMB5 PE=1 SV=3	880.674	55.51	1	14	14	25	7085979230	28.4622
UniProtKB:Q9C0C9	Ubiquitin-conjugating enzyme E2 O OS=Homo sapiens GN=UBE2O PE=1 SV=3	878.693	24.07	1	20	20	29	2908657264	141.205
UniProtKB:P09936	Ubiquitin carboxyl-terminal hydrolase isozyme L1 OS=Homo sapiens GN=UCHL1 PE=1 SV=2	877.636	58.3	1	9	9	26	1.82925e+10	24.8085
UniProtKB:Q9Y696	Chloride intracellular channel protein 4 OS=Homo sapiens GN=CLIC4 PE=1 SV=4	877.529	61.66	1	11	12	23	3636242834	28.7537
UniProtKB:Q15185	Prostaglandin E synthase 3 OS=Homo sapiens GN=PTGES3 PE=1 SV=1	877.522	65	1	10	10	27	2.07037e+10	18.6854
UniProtKB:P08708	40S ribosomal protein S17 OS=Homo sapiens GN=RPS17 PE=1 SV=2	877.247	49.63	1	5	5	21	1.66978e+10	15.5404
UniProtKB:P27695	DNA-(apurinic or apyrimidinic site) lyase OS=Homo sapiens GN=APEX1 PE=1 SV=2	876.091	59.75	1	13	13	26	13070707800	35.5322
UniProtKB:P25786	Proteasome subunit alpha type-1 OS=Homo sapiens GN=PSMA1 PE=1 SV=1	876.07	62.74	1	14	14	31	9.83216e+09	29.5369
UniProtKB:P37837	Transaldolase OS=Homo sapiens GN=TALDO1 PE=1 SV=2	875.392	43.32	1	16	16	38	9.9644e+09	37.5165
UniProtKB:Q96PK6	RNA-binding protein 14 OS=Homo sapiens GN=RBM14 PE=1 SV=2	875.355	31.69	1	20	20	36	10721631450	69.4489
UniProtKB:O43399	Tumor protein D54 OS=Homo sapiens GN=TPD52L2 PE=1 SV=2	874.961	73.3	1	12	12	25	6.06613e+09	22.2243
UniProtKB:Q6PJT7	Zinc finger CCCH domain-containing protein 14 OS=Homo sapiens GN=ZC3H14 PE=1 SV=1	874.762	33.29	1	19	19	29	2.48168e+09	82.8233
UniProtKB:Q6Y7W6	PERQ amino acid-rich with GYF domain-containing protein 2 OS=Homo sapiens GN=GIGYF2 PE=1 SV=1	873.83	14.86	1	14	14	23	2.56379e+09	149.978
UniProtKB:P34949	Mannose-6-phosphate isomerase OS=Homo sapiens GN=MPI PE=1 SV=2	873.342	42.55	1	12	12	24	2.06839e+09	46.6258
UniProtKB:Q5BKZ1	Zinc finger protein 326 OS=Homo sapiens GN=ZNF326 PE=1 SV=2	871.577	37.11	1	18	18	30	3.70098e+09	65.6131
UniProtKB:Q15436	Protein transport protein Sec23A OS=Homo sapiens GN=SEC23A PE=1 SV=2	871.25	28.1	1	13	14	21	3.41718e+09	86.1053
UniProtKB:Q13492	Phosphatidylinositol-binding clathrin assembly protein OS=Homo sapiens GN=PICALM PE=1 SV=2	870.335	33.28	1	12	13	19	2520042722	70.71
UniProtKB:Q14C86	GTPase-activating protein and VPS9 domain-containing protein 1 OS=Homo sapiens GN=GAPVD1 PE=1 SV=2	870.096	18.81	1	21	21	26	3380181998	164.877
UniProtKB:P62081	40S ribosomal protein S7 OS=Homo sapiens GN=RPS7 PE=1 SV=1	869.385	51.03	1	8	8	29	3.88099e+10	22.1133
UniProtKB:P50851	Lipopolysaccharide-responsive and beige-like anchor protein OS=Homo sapiens GN=LRBA PE=1 SV=4	865.947	10.51	1	19	21	26	1644517410	318.906
UniProtKB:Q99873	Protein arginine N-methyltransferase 1 OS=Homo sapiens GN=PRMT1 PE=1 SV=2	865.88	51.25	1	14	17	27	7.23883e+09	41.4885
UniProtKB:Q9UGV6	Putative high mobility group protein 1-like 10 OS=Homo sapiens GN=HMGB1L10 PE=5 SV=1	865.712	24.64	1	0	10	34	2.18647e+10	24.203
UniProtKB:Q09161	Nuclear cap-binding protein subunit 1 OS=Homo sapiens GN=NCBP1 PE=1 SV=1	864.204	33.29	1	20	20	33	2503789323	91.7805
UniProtKB:O43242	26S proteasome non-ATPase regulatory subunit 3 OS=Homo sapiens GN=PSMD3 PE=1 SV=2	863.825	53.75	1	26	26	37	6.26546e+09	60.9395
UniProtKB:Q99623	Prohibitin-2 OS=Homo sapiens GN=PHB2 PE=1 SV=2	861.213	51.17	1	13	13	29	1.0686e+10	33.2759
UniProtKB:Q92797	Symplekin OS=Homo sapiens GN=SYMPK PE=1 SV=2	860.034	27.08	1	21	21	24	1.60576e+09	141.059
UniProtKB:P54578	Ubiquitin carboxyl-terminal hydrolase 14 OS=Homo sapiens GN=USP14 PE=1 SV=3	859.194	43.32	1	17	17	26	3243190810	56.033
UniProtKB:Q07666	KH domain-containing, RNA-binding, signal transduction-associated protein 1 OS=Homo sapiens GN=KHDRBS1 PE=1 SV=1	859.1	31.15	1	9	10	29	2.13632e+10	48.1972
UniProtKB:Q9NRR5	Ubiquilin-4 OS=Homo sapiens GN=UBQLN4 PE=1 SV=2	858.99	30.45	1	7	11	20	3386422222	63.8124
UniProtKB:Q9Y2A7	Nck-associated protein 1 OS=Homo sapiens GN=NCKAP1 PE=1 SV=1	858.309	20.39	1	17	17	24	1.45118e+09	128.707
UniProtKB:Q14257	Reticulocalbin-2 OS=Homo sapiens GN=RCN2 PE=1 SV=1	856.11	35.96	1	8	8	14	3.22894e+09	36.8536
UniProtKB:P07602	Proactivator polypeptide OS=Homo sapiens GN=PSAP PE=1 SV=2	856.094	28.24	1	14	14	29	6.28024e+09	58.0739
UniProtKB:O60812	Heterogeneous nuclear ribonucleoprotein C-like 1 OS=Homo sapiens GN=HNRNPCL1 PE=1 SV=1	854.975	17.41	1	0	8	29	57829714868	32.1227
UniProtKB:Q9NR31	GTP-binding protein SAR1a OS=Homo sapiens GN=SAR1A PE=1 SV=1	854.006	56.57	1	7	10	20	5.31265e+09	22.3525
UniProtKB:Q9H0D6	5'-3' exoribonuclease 2 OS=Homo sapiens GN=XRN2 PE=1 SV=1	850.176	28.32	1	21	21	29	2.20903e+09	108.513
UniProtKB:P26373	60S ribosomal protein L13 OS=Homo sapiens GN=RPL13 PE=1 SV=4	849.921	36.49	1	10	10	36	27091602868	24.2465
UniProtKB:P14174	Macrophage migration inhibitory factor OS=Homo sapiens GN=MIF PE=1 SV=4	845.393	36.52	1	4	4	87	119468750877	12.4682
UniProtKB:A6NK07	Eukaryotic translation initiation factor 2 subunit 2-like protein OS=Homo sapiens PE=1 SV=1	845.249	42.51	1	0	13	26	3.48041e+09	37.7631
UniProtKB:Q8IWJ2	GRIP and coiled-coil domain-containing protein 2 OS=Homo sapiens GN=GCC2 PE=1 SV=4	842.554	12.35	1	16	16	23	1.13889e+09	195.789
UniProtKB:Q9Y450	HBS1-like protein OS=Homo sapiens GN=HBS1L PE=1 SV=1	838.921	33.19	1	16	16	21	2.2071e+09	75.4256
UniProtKB:O14497	AT-rich interactive domain-containing protein 1A OS=Homo sapiens GN=ARID1A PE=1 SV=3	838.259	12.39	1	15	17	22	1.28363e+09	241.892
UniProtKB:P78347	General transcription factor II-I OS=Homo sapiens GN=GTF2I PE=1 SV=2	837.721	33.77	1	23	24	31	2871992474	112.346
UniProtKB:P57721	Poly(rC)-binding protein 3 OS=Homo sapiens GN=PCBP3 PE=1 SV=2	837.69	19.68	1	1	6	26	4.35459e+10	39.4403
UniProtKB:Q9Y263	Phospholipase A-2-activating protein OS=Homo sapiens GN=PLAA PE=1 SV=2	836.393	35.85	1	19	19	24	2.42e+09	87.1014
UniProtKB:P43686	26S protease regulatory subunit 6B OS=Homo sapiens GN=PSMC4 PE=1 SV=2	836.283	54.07	1	16	16	29	6489658630	47.3365
UniProtKB:Q8TBC4	NEDD8-activating enzyme E1 catalytic subunit OS=Homo sapiens GN=UBA3 PE=1 SV=2	836.206	43.41	1	14	14	22	2645335536	51.8193
UniProtKB:Q641Q2	WASH complex subunit FAM21A OS=Homo sapiens GN=FAM21A PE=1 SV=3	836.143	15.88	1	0	12	16	8.89626e+08	147.095
UniProtKB:P46939	Utrophin OS=Homo sapiens GN=UTRN PE=1 SV=2	834.486	7.75	1	21	21	27	5.38803e+08	394.22
UniProtKB:Q9H3U1	Protein unc-45 homolog A OS=Homo sapiens GN=UNC45A PE=1 SV=1	834.4	25.74	1	17	17	20	2.15555e+09	103.011
UniProtKB:Q14692	Ribosome biogenesis protein BMS1 homolog OS=Homo sapiens GN=BMS1 PE=1 SV=1	834.183	22.23	1	19	19	23	2.07811e+09	145.716
UniProtKB:Q9UKX7	Nuclear pore complex protein Nup50 OS=Homo sapiens GN=NUP50 PE=1 SV=2	832.85	32.05	1	10	10	19	2.35508e+09	50.1132
UniProtKB:Q9BXP5	Serrate RNA effector molecule homolog OS=Homo sapiens GN=SRRT PE=1 SV=1	831.699	31.16	1	25	25	39	4145661328	100.604
UniProtKB:Q15813	Tubulin-specific chaperone E OS=Homo sapiens GN=TBCE PE=1 SV=1	827.604	41.37	1	15	16	24	1.60975e+09	59.309
UniProtKB:P11908	Ribose-phosphate pyrophosphokinase 2 OS=Homo sapiens GN=PRPS2 PE=1 SV=2	826.57	49.69	1	4	12	28	8.23308e+09	34.747
UniProtKB:P50454	Serpin H1 OS=Homo sapiens GN=SERPINH1 PE=1 SV=2	826.525	43.54	1	14	14	28	6.83063e+09	46.4112
UniProtKB:P84085	ADP-ribosylation factor 5 OS=Homo sapiens GN=ARF5 PE=1 SV=2	824.887	83.89	1	7	12	26	1.66178e+10	20.5166
UniProtKB:P26640	Valyl-tRNA synthetase OS=Homo sapiens GN=VARS PE=1 SV=4	824.51	26.42	1	23	23	28	2071528550	140.387
UniProtKB:Q9H2G2	STE20-like serine/threonine-protein kinase OS=Homo sapiens GN=SLK PE=1 SV=1	824.187	21.7	1	19	20	27	1.42116e+09	142.607
UniProtKB:Q92878	DNA repair protein RAD50 OS=Homo sapiens GN=RAD50 PE=1 SV=1	822.461	19.66	1	21	21	26	2.00788e+09	153.797
UniProtKB:Q9NUU7	ATP-dependent RNA helicase DDX19A OS=Homo sapiens GN=DDX19A PE=1 SV=1	821.031	42.68	1	2	19	31	3.13371e+09	53.9408
UniProtKB:Q9Y295	Developmentally-regulated GTP-binding protein 1 OS=Homo sapiens GN=DRG1 PE=1 SV=1	820.121	35.69	1	11	11	18	2.54731e+09	40.5168
UniProtKB:P49721	Proteasome subunit beta type-2 OS=Homo sapiens GN=PSMB2 PE=1 SV=1	819.611	74.63	1	13	13	25	5.04806e+09	22.8217
UniProtKB:Q14151	Scaffold attachment factor B2 OS=Homo sapiens GN=SAFB2 PE=1 SV=1	819.398	24.97	1	9	19	22	3.58869e+09	107.408
UniProtKB:P04181	Ornithine aminotransferase, mitochondrial OS=Homo sapiens GN=OAT PE=1 SV=1	818.737	49.43	1	15	15	24	4.06569e+09	48.5042
UniProtKB:Q9BXJ9	N-alpha-acetyltransferase 15, NatA auxiliary subunit OS=Homo sapiens GN=NAA15 PE=1 SV=1	818.446	25.87	1	17	22	35	3.18523e+09	101.208
UniProtKB:P61221	ATP-binding cassette sub-family E member 1 OS=Homo sapiens GN=ABCE1 PE=1 SV=1	817.816	38.4	1	19	19	27	2.63653e+09	67.271
UniProtKB:P46087	Putative ribosomal RNA methyltransferase NOP2 OS=Homo sapiens GN=NOP2 PE=1 SV=2	816.73	28.57	1	17	17	29	2676432368	89.2471
UniProtKB:Q8NC51	Plasminogen activator inhibitor 1 RNA-binding protein OS=Homo sapiens GN=SERBP1 PE=1 SV=2	816.21	41.18	1	15	15	34	1.126e+10	44.9385
UniProtKB:P61011	Signal recognition particle 54 kDa protein OS=Homo sapiens GN=SRP54 PE=1 SV=1	812.576	44.84	1	18	18	25	2801114418	55.6683
Ensembl:CON_ENSBTAP00000025008	(Bos taurus) hypothetical protein	810.038	5.41	1	0	5	42	5.3444e+10	59.262
UniProtKB:Q9H4B7	Tubulin beta-1 chain OS=Homo sapiens GN=TUBB1 PE=1 SV=1	810.038	6.43	1	0	5	42	5.3444e+10	50.2946
UniProtKB:P16615	Sarcoplasmic/endoplasmic reticulum calcium ATPase 2 OS=Homo sapiens GN=ATP2A2 PE=1 SV=1	809.592	15.83	1	4	11	17	1.13991e+09	114.683
UniProtKB:Q9Y6G9	Cytoplasmic dynein 1 light intermediate chain 1 OS=Homo sapiens GN=DYNC1LI1 PE=1 SV=3	809.07	40.34	1	17	18	32	4158284900	56.544
UniProtKB:Q13126	S-methyl-5'-thioadenosine phosphorylase OS=Homo sapiens GN=MTAP PE=1 SV=2	807.938	62.19	1	14	14	29	6.34821e+09	31.2158
UniProtKB:Q9UMR2	ATP-dependent RNA helicase DDX19B OS=Homo sapiens GN=DDX19B PE=1 SV=1	806.007	46.56	1	2	19	31	3.13371e+09	53.8928
UniProtKB:P83916	Chromobox protein homolog 1 OS=Homo sapiens GN=CBX1 PE=1 SV=1	805.13	35.14	1	5	6	19	1.0959e+10	21.4046
UniProtKB:P04080	Cystatin-B OS=Homo sapiens GN=CSTB PE=1 SV=2	804.507	76.53	1	5	5	21	2.20795e+10	11.1326
UniProtKB:Q14684	Ribosomal RNA processing protein 1 homolog B OS=Homo sapiens GN=RRP1B PE=1 SV=3	803.369	44.2	1	23	23	33	3.42994e+09	84.3752
UniProtKB:Q9NQX3	Gephyrin OS=Homo sapiens GN=GPHN PE=1 SV=1	802.623	26.36	1	16	16	22	1108565522	79.698
UniProtKB:Q9UKY7	Protein CDV3 homolog OS=Homo sapiens GN=CDV3 PE=1 SV=1	802.142	65.89	1	9	9	22	9.05827e+09	27.3184
UniProtKB:P19623	Spermidine synthase OS=Homo sapiens GN=SRM PE=1 SV=1	801.771	64.57	1	13	13	24	9.22063e+09	33.8027
UniProtKB:Q9BVJ6	U3 small nucleolar RNA-associated protein 14 homolog A OS=Homo sapiens GN=UTP14A PE=1 SV=1	800.787	29.31	1	13	17	23	1.15523e+09	87.9241
UniProtKB:Q9UHD9	Ubiquilin-2 OS=Homo sapiens GN=UBQLN2 PE=1 SV=2	799.698	21.79	1	4	9	18	2606738666	65.6546
UniProtKB:P0CG38	POTE ankyrin domain family member I OS=Homo sapiens GN=POTEI PE=3 SV=1	798.274	4.28	1	0	5	75	245766909994	121.205
UniProtKB:Q07020	60S ribosomal protein L18 OS=Homo sapiens GN=RPL18 PE=1 SV=2	797.566	32.45	1	8	8	28	2.93609e+10	21.6211
UniProtKB:P36871	Phosphoglucomutase-1 OS=Homo sapiens GN=PGM1 PE=1 SV=3	796.559	46.62	1	19	19	25	3.93074e+09	61.4105
UniProtKB:Q92734	Protein TFG OS=Homo sapiens GN=TFG PE=1 SV=2	796.239	38.25	1	10	10	17	6843328370	43.4212
UniProtKB:O75822	Eukaryotic translation initiation factor 3 subunit J OS=Homo sapiens GN=EIF3J PE=1 SV=2	795.714	61.63	1	13	13	19	4.19058e+09	29.0445
UniProtKB:O43847	Nardilysin OS=Homo sapiens GN=NRD1 PE=1 SV=2	795.439	20.78	1	19	19	26	1.55374e+09	131.488
UniProtKB:P52788	Spermine synthase OS=Homo sapiens GN=SMS PE=1 SV=2	794.727	52.46	1	13	13	20	2085604133	41.2418
UniProtKB:Q03701	CCAAT/enhancer-binding protein zeta OS=Homo sapiens GN=CEBPZ PE=1 SV=3	792.622	21.16	1	18	18	24	1.02965e+09	120.898
UniProtKB:P38606	V-type proton ATPase catalytic subunit A OS=Homo sapiens GN=ATP6V1A PE=1 SV=2	792.582	40.19	1	22	22	30	6324775940	68.2605
UniProtKB:Q92538	Golgi-specific brefeldin A-resistance guanine nucleotide exchange factor 1 OS=Homo sapiens GN=GBF1 PE=1 SV=2	792.517	14.74	1	17	18	48	1.3304e+10	206.315
UniProtKB:O94979	Protein transport protein Sec31A OS=Homo sapiens GN=SEC31A PE=1 SV=3	792.43	22.05	1	19	19	25	2.5839e+09	132.931
UniProtKB:O15294	UDP-N-acetylglucosamine--peptide N-acetylglucosaminyltransferase 110 kDa subunit OS=Homo sapiens GN=OGT PE=1 SV=3	791.711	23.14	1	17	17	23	2.90031e+09	116.85
UniProtKB:P49591	Seryl-tRNA synthetase, cytoplasmic OS=Homo sapiens GN=SARS PE=1 SV=3	790.64	44.16	1	17	17	27	3.911e+09	58.7401
UniProtKB:O95347	Structural maintenance of chromosomes protein 2 OS=Homo sapiens GN=SMC2 PE=1 SV=2	790.341	25.81	1	27	27	34	1778591449	135.572
UniProtKB:P23258	Tubulin gamma-1 chain OS=Homo sapiens GN=TUBG1 PE=1 SV=2	790.282	45.23	1	3	14	20	2.72517e+09	51.1378
UniProtKB:P14923	Junction plakoglobin OS=Homo sapiens GN=JUP PE=1 SV=3	789.817	22.28	1	9	11	18	1.87136e+09	81.6927
UniProtKB:Q9P2J5	Leucyl-tRNA synthetase, cytoplasmic OS=Homo sapiens GN=LARS PE=1 SV=2	789.759	25.6	1	24	24	31	2.15225e+09	134.379
UniProtKB:P35520	Cystathionine beta-synthase OS=Homo sapiens GN=CBS PE=1 SV=2	787.87	34.12	1	15	15	23	9.83581e+09	60.5482
UniProtKB:Q13765	Nascent polypeptide-associated complex subunit alpha OS=Homo sapiens GN=NACA PE=1 SV=1	787.739	25.58	1	3	4	22	2.75819e+10	23.3697
UniProtKB:Q58FG0	Putative heat shock protein HSP 90-alpha A5 OS=Homo sapiens GN=HSP90AA5P PE=1 SV=1	787.501	15.87	1	0	6	41	1.31145e+11	38.7138
UniProtKB:P48637	Glutathione synthetase OS=Homo sapiens GN=GSS PE=1 SV=1	784.72	39.66	1	13	13	20	3.18583e+09	52.3523
UniProtKB:Q9NVA2	Septin-11 OS=Homo sapiens GN=SEPT11 PE=1 SV=3	784.194	51.75	1	10	18	29	7855731406	49.3672
UniProtKB:P30050	60S ribosomal protein L12 OS=Homo sapiens GN=RPL12 PE=1 SV=1	784.12	54.55	1	6	6	24	19772631008	17.8075
UniProtKB:Q9BTE3	UPF0557 protein C10orf119 OS=Homo sapiens GN=C10orf119 PE=1 SV=2	783.931	30.37	1	17	17	27	2.34505e+09	72.9338
UniProtKB:Q16543	Hsp90 co-chaperone Cdc37 OS=Homo sapiens GN=CDC37 PE=1 SV=1	783.139	40.48	1	15	15	32	1.11777e+10	44.44
UniProtKB:Q96I24	Far upstream element-binding protein 3 OS=Homo sapiens GN=FUBP3 PE=1 SV=2	782.93	48.43	1	19	21	35	5.07155e+09	61.6022
UniProtKB:Q93009	Ubiquitin carboxyl-terminal hydrolase 7 OS=Homo sapiens GN=USP7 PE=1 SV=2	782.325	28.4	1	24	24	34	3.6434e+09	128.22
UniProtKB:P17174	Aspartate aminotransferase, cytoplasmic OS=Homo sapiens GN=GOT1 PE=1 SV=3	782.18	47.7	1	17	17	25	4249497716	46.2185
UniProtKB:O00116	Alkyldihydroxyacetonephosphate synthase, peroxisomal OS=Homo sapiens GN=AGPS PE=1 SV=1	780.011	27.36	1	14	14	24	1251536723	72.8658
UniProtKB:P42858	Huntingtin OS=Homo sapiens GN=HTT PE=1 SV=2	778.386	8.56	1	19	19	23	612817897	347.383
UniProtKB:P27824	Calnexin OS=Homo sapiens GN=CANX PE=1 SV=2	775.73	34.8	1	15	16	26	4.07317e+09	67.5259
UniProtKB:Q14247	Src substrate cortactin OS=Homo sapiens GN=CTTN PE=1 SV=2	775.556	32.91	1	17	17	25	3.57568e+09	61.5485
UniProtKB:A6NMY6	Putative annexin A2-like protein OS=Homo sapiens GN=ANXA2P2 PE=5 SV=2	775.163	46.31	1	0	15	28	8.70837e+09	38.6348
UniProtKB:P22087	rRNA 2'-O-methyltransferase fibrillarin OS=Homo sapiens GN=FBL PE=1 SV=2	773.282	52.02	1	11	13	26	6.2334e+09	33.7634
UniProtKB:P24928	DNA-directed RNA polymerase II subunit RPB1 OS=Homo sapiens GN=POLR2A PE=1 SV=2	771.142	17.87	1	21	21	23	8.20622e+08	217.039
UniProtKB:Q9Y6Y8	SEC23-interacting protein OS=Homo sapiens GN=SEC23IP PE=1 SV=1	770.97	27.4	1	19	19	25	1.627e+09	111.007
UniProtKB:P61313	60S ribosomal protein L15 OS=Homo sapiens GN=RPL15 PE=1 SV=2	770.563	38.73	1	8	8	28	2.67468e+10	24.1311
UniProtKB:P52948	Nuclear pore complex protein Nup98-Nup96 OS=Homo sapiens GN=NUP98 PE=1 SV=4	770.071	12.33	1	17	17	25	1219970354	197.457
UniProtKB:Q6PGP7	Tetratricopeptide repeat protein 37 OS=Homo sapiens GN=TTC37 PE=1 SV=1	769.88	16.05	1	17	17	21	6.14941e+08	175.375
UniProtKB:O00629	Importin subunit alpha-4 OS=Homo sapiens GN=KPNA4 PE=1 SV=1	769.24	29.56	1	6	9	17	3.14048e+09	57.8506
UniProtKB:Q9BVP2	Guanine nucleotide-binding protein-like 3 OS=Homo sapiens GN=GNL3 PE=1 SV=2	768.483	44.08	1	20	21	30	2.73808e+09	61.9545
UniProtKB:O60678	Protein arginine N-methyltransferase 3 OS=Homo sapiens GN=PRMT3 PE=1 SV=2	767.28	28.25	1	11	11	17	1.54679e+09	59.8648
UniProtKB:P62906	60S ribosomal protein L10a OS=Homo sapiens GN=RPL10A PE=1 SV=2	761.955	41.94	1	10	10	34	2.36777e+10	24.8155
UniProtKB:P18085	ADP-ribosylation factor 4 OS=Homo sapiens GN=ARF4 PE=1 SV=3	761.501	76.11	1	6	10	26	1.26075e+10	20.4977
UniProtKB:P78344	Eukaryotic translation initiation factor 4 gamma 2 OS=Homo sapiens GN=EIF4G2 PE=1 SV=1	761.237	30.32	1	24	24	34	3.73986e+09	102.297
UniProtKB:Q5JTH9	RRP12-like protein OS=Homo sapiens GN=RRP12 PE=1 SV=2	761.105	20.35	1	19	19	24	2.20828e+09	143.611
UniProtKB:P68036	Ubiquitin-conjugating enzyme E2 L3 OS=Homo sapiens GN=UBE2L3 PE=1 SV=1	760.334	68.18	1	8	8	18	8.07162e+09	17.8502
UniProtKB:Q15008	26S proteasome non-ATPase regulatory subunit 6 OS=Homo sapiens GN=PSMD6 PE=1 SV=1	760.166	57.58	1	20	20	31	6.5948e+09	45.5023
UniProtKB:O95861	3'(2'),5'-bisphosphate nucleotidase 1 OS=Homo sapiens GN=BPNT1 PE=1 SV=1	759.985	50.65	1	12	12	24	3.13207e+09	33.3712
UniProtKB:P49419	Alpha-aminoadipic semialdehyde dehydrogenase OS=Homo sapiens GN=ALDH7A1 PE=1 SV=5	759.632	29.31	1	12	12	21	3.39988e+09	58.4501
UniProtKB:P62316	Small nuclear ribonucleoprotein Sm D2 OS=Homo sapiens GN=SNRPD2 PE=1 SV=1	759.235	74.58	1	12	12	30	2.11151e+10	13.5182
UniProtKB:Q9Y6A5	Transforming acidic coiled-coil-containing protein 3 OS=Homo sapiens GN=TACC3 PE=1 SV=1	757.17	23.75	1	15	15	23	2.20189e+09	90.3038
UniProtKB:O95433	Activator of 90 kDa heat shock protein ATPase homolog 1 OS=Homo sapiens GN=AHSA1 PE=1 SV=1	756.948	52.96	1	15	15	25	1.1026e+10	38.2503
UniProtKB:Q9Y2T7	Y-box-binding protein 2 OS=Homo sapiens GN=YBX2 PE=1 SV=2	756.04	10.99	1	0	5	16	1.18123e+10	38.4948
UniProtKB:P13861	cAMP-dependent protein kinase type II-alpha regulatory subunit OS=Homo sapiens GN=PRKAR2A PE=1 SV=2	754.886	49.5	1	14	15	25	3995894480	45.49
UniProtKB:Q8WWM7	Ataxin-2-like protein OS=Homo sapiens GN=ATXN2L PE=1 SV=2	753.26	20.74	1	18	18	31	4.25822e+09	113.304
UniProtKB:O00541	Pescadillo homolog OS=Homo sapiens GN=PES1 PE=1 SV=1	753.134	34.35	1	17	17	31	3.59311e+09	67.96
UniProtKB:O95817	BAG family molecular chaperone regulator 3 OS=Homo sapiens GN=BAG3 PE=1 SV=3	752.642	26.43	1	10	10	20	1.55756e+09	61.5569
UniProtKB:P48444	Coatomer subunit delta OS=Homo sapiens GN=ARCN1 PE=1 SV=1	750.926	40.31	1	19	19	35	5.16808e+09	57.1741
UniProtKB:P30876	DNA-directed RNA polymerase II subunit RPB2 OS=Homo sapiens GN=POLR2B PE=1 SV=1	750.103	26.15	1	21	21	23	1867789196	133.811
UniProtKB:Q9NQW7	Xaa-Pro aminopeptidase 1 OS=Homo sapiens GN=XPNPEP1 PE=1 SV=3	749.874	30.34	1	14	14	23	2.26103e+09	69.8732
UniProtKB:P48739	Phosphatidylinositol transfer protein beta isoform OS=Homo sapiens GN=PITPNB PE=1 SV=2	747.898	47.23	1	12	15	23	5588135485	31.5199
UniProtKB:Q13148	TAR DNA-binding protein 43 OS=Homo sapiens GN=TARDBP PE=1 SV=1	747.82	35.51	1	9	9	22	7801251734	44.7113
UniProtKB:Q9GZV4	Eukaryotic translation initiation factor 5A-2 OS=Homo sapiens GN=EIF5A2 PE=1 SV=3	746.568	29.41	1	0	5	29	27772368336	16.7822
UniProtKB:Q7Z2W4	Zinc finger CCCH-type antiviral protein 1 OS=Homo sapiens GN=ZC3HAV1 PE=1 SV=3	743.113	21.18	1	14	14	19	1.48568e+09	101.367
UniProtKB:P0CG39	POTE ankyrin domain family member J OS=Homo sapiens GN=POTEJ PE=3 SV=1	742.192	3.37	1	0	4	30	1.33811e+11	117.315
UniProtKB:Q12769	Nuclear pore complex protein Nup160 OS=Homo sapiens GN=NUP160 PE=1 SV=3	741.943	18.8	1	20	20	26	2.38327e+09	162.017
UniProtKB:P27361	Mitogen-activated protein kinase 3 OS=Homo sapiens GN=MAPK3 PE=1 SV=4	741.91	38.79	1	6	13	25	4.71491e+09	43.1081
UniProtKB:P98179	Putative RNA-binding protein 3 OS=Homo sapiens GN=RBM3 PE=1 SV=1	739.512	61.15	1	7	7	23	2.56371e+10	17.16
UniProtKB:Q8N3U4	Cohesin subunit SA-2 OS=Homo sapiens GN=STAG2 PE=1 SV=3	738.591	14.46	1	10	13	19	1651938487	141.235
UniProtKB:P57678	Component of gems 4 OS=Homo sapiens GN=GEMIN4 PE=1 SV=1	738.422	27.6	1	25	25	28	1.76955e+09	119.913
UniProtKB:Q58FF6	Putative heat shock protein HSP 90-beta 4 OS=Homo sapiens GN=HSP90AB4P PE=5 SV=1	738.394	13.07	1	3	8	45	1.66319e+11	58.2276
UniProtKB:P32119	Peroxiredoxin-2 OS=Homo sapiens GN=PRDX2 PE=1 SV=5	737.733	70.2	1	12	13	30	3.48991e+10	21.8782
UniProtKB:O94906	Pre-mRNA-processing factor 6 OS=Homo sapiens GN=PRPF6 PE=1 SV=1	737.294	17.53	1	14	14	20	1307450936	106.858
UniProtKB:Q7L014	Probable ATP-dependent RNA helicase DDX46 OS=Homo sapiens GN=DDX46 PE=1 SV=2	736.675	30.26	1	25	25	33	1.65034e+09	117.29
UniProtKB:Q96FW1	Ubiquitin thioesterase OTUB1 OS=Homo sapiens GN=OTUB1 PE=1 SV=2	736.312	58.67	1	12	12	24	6009335121	31.2644
UniProtKB:Q3LXA3	Bifunctional ATP-dependent dihydroxyacetone kinase/FAD-AMP lyase (cyclizing) OS=Homo sapiens GN=DAK PE=1 SV=2	735.923	23.83	1	9	9	17	1409289191	58.91
UniProtKB:O14828	Secretory carrier-associated membrane protein 3 OS=Homo sapiens GN=SCAMP3 PE=1 SV=3	735.561	33.14	1	8	8	13	1629740216	38.2623
UniProtKB:Q04726	Transducin-like enhancer protein 3 OS=Homo sapiens GN=TLE3 PE=1 SV=2	733.851	29.92	1	12	16	25	1.77156e+09	83.3641
UniProtKB:P49589	Cysteinyl-tRNA synthetase, cytoplasmic OS=Homo sapiens GN=CARS PE=1 SV=3	733.493	20.59	1	14	14	21	2059967911	85.4192
UniProtKB:Q9UHD8	Septin-9 OS=Homo sapiens GN=SEPT9 PE=1 SV=2	732.742	31.57	1	14	14	25	1979885462	65.3608
UniProtKB:Q9UPU5	Ubiquitin carboxyl-terminal hydrolase 24 OS=Homo sapiens GN=USP24 PE=1 SV=3	731.374	11.87	1	23	23	25	1.20824e+09	294.178
UniProtKB:Q99798	Aconitate hydratase, mitochondrial OS=Homo sapiens GN=ACO2 PE=1 SV=2	730.254	31.92	1	18	18	24	2.64784e+09	85.3719
UniProtKB:P49756	RNA-binding protein 25 OS=Homo sapiens GN=RBM25 PE=1 SV=3	728.317	26.33	1	17	17	26	5.713e+09	100.124
UniProtKB:O95747	Serine/threonine-protein kinase OSR1 OS=Homo sapiens GN=OXSR1 PE=1 SV=1	727.473	31.5	1	12	14	20	2.39592e+09	57.9861
UniProtKB:O00151	PDZ and LIM domain protein 1 OS=Homo sapiens GN=PDLIM1 PE=1 SV=4	725.509	60.49	1	13	13	23	2.98068e+09	36.049
UniProtKB:Q8TAQ2	SWI/SNF complex subunit SMARCC2 OS=Homo sapiens GN=SMARCC2 PE=1 SV=1	725.453	16.64	1	12	17	24	3.59802e+09	132.797
UniProtKB:Q9Y2L1	Exosome complex exonuclease RRP44 OS=Homo sapiens GN=DIS3 PE=1 SV=2	723.875	24.32	1	19	19	25	2.86507e+09	108.934
UniProtKB:P49903	Selenide, water dikinase 1 OS=Homo sapiens GN=SEPHS1 PE=1 SV=2	723.245	44.39	1	10	10	16	3.37777e+09	42.8827
UniProtKB:P36507	Dual specificity mitogen-activated protein kinase kinase 2 OS=Homo sapiens GN=MAP2K2 PE=1 SV=1	722.78	42	1	9	12	18	2.50636e+09	44.3961
UniProtKB:Q6PKG0	La-related protein 1 OS=Homo sapiens GN=LARP1 PE=1 SV=2	720.805	28.83	1	20	22	30	2.74188e+09	123.434
UniProtKB:O60832	H/ACA ribonucleoprotein complex subunit 4 OS=Homo sapiens GN=DKC1 PE=1 SV=3	720.163	40.86	1	20	20	29	3.76684e+09	57.6378
UniProtKB:Q12849	G-rich sequence factor 1 OS=Homo sapiens GN=GRSF1 PE=1 SV=3	720.027	26.46	1	9	9	19	2.6929e+09	53.0926
UniProtKB:Q5JSH3	WD repeat-containing protein 44 OS=Homo sapiens GN=WDR44 PE=1 SV=1	719.643	25.19	1	15	15	19	1.45142e+09	101.304
UniProtKB:P54105	Methylosome subunit pICln OS=Homo sapiens GN=CLNS1A PE=1 SV=1	719.567	59.49	1	7	7	11	3026030596	26.1989
UniProtKB:P06280	Alpha-galactosidase A OS=Homo sapiens GN=GLA PE=1 SV=1	719.112	28.9	1	10	10	18	3.36755e+09	48.7349
UniProtKB:Q7L2H7	Eukaryotic translation initiation factor 3 subunit M OS=Homo sapiens GN=EIF3M PE=1 SV=1	719.038	38.5	1	12	12	24	4.57378e+09	42.4758
UniProtKB:Q9NVP1	ATP-dependent RNA helicase DDX18 OS=Homo sapiens GN=DDX18 PE=1 SV=2	718.236	27.01	1	15	15	20	2828538489	75.3594
UniProtKB:Q15637	Splicing factor 1 OS=Homo sapiens GN=SF1 PE=1 SV=4	717.2	27.39	1	14	14	26	5768378568	68.2859
UniProtKB:Q96DI7	U5 small nuclear ribonucleoprotein 40 kDa protein OS=Homo sapiens GN=SNRNP40 PE=1 SV=1	716.701	40.34	1	9	9	17	6.6649e+09	39.2857
UniProtKB:Q08378	Golgin subfamily A member 3 OS=Homo sapiens GN=GOLGA3 PE=1 SV=2	714.866	15.89	1	17	17	19	6.51074e+08	167.252
UniProtKB:Q9Y4W2	Protein LAS1 homolog OS=Homo sapiens GN=LAS1L PE=1 SV=2	712.932	26.57	1	14	14	19	1.25007e+09	83.0128
UniProtKB:P40222	Alpha-taxilin OS=Homo sapiens GN=TXLNA PE=1 SV=3	712.748	43.96	1	19	21	29	2.73503e+09	61.8532
UniProtKB:Q68DN6	RANBP2-like and GRIP domain-containing protein 1/2 OS=Homo sapiens GN=RGPD1 PE=1 SV=2	710.164	9.21	1	2	14	22	1.91557e+09	196.514
UniProtKB:P24666	Low molecular weight phosphotyrosine protein phosphatase OS=Homo sapiens GN=ACP1 PE=1 SV=3	709.155	44.94	1	5	5	13	2.12003e+09	18.0308
UniProtKB:P20618	Proteasome subunit beta type-1 OS=Homo sapiens GN=PSMB1 PE=1 SV=2	708.832	53.53	1	12	12	23	4844039226	26.4724
UniProtKB:O95831	Apoptosis-inducing factor 1, mitochondrial OS=Homo sapiens GN=AIFM1 PE=1 SV=1	708.692	31	1	15	15	20	3205947846	66.8589
UniProtKB:P68400	Casein kinase II subunit alpha OS=Homo sapiens GN=CSNK2A1 PE=1 SV=1	707.885	40.41	1	13	14	24	6.75126e+09	45.1148
UniProtKB:Q9UIA9	Exportin-7 OS=Homo sapiens GN=XPO7 PE=1 SV=3	707.187	21.62	1	18	18	25	1.65228e+09	123.828
UniProtKB:P11717	Cation-independent mannose-6-phosphate receptor OS=Homo sapiens GN=IGF2R PE=1 SV=2	706.552	11.48	1	24	24	27	1909635986	274.1
UniProtKB:P15121	Aldose reductase OS=Homo sapiens GN=AKR1B1 PE=1 SV=3	706.294	51.58	1	12	14	31	1.20216e+10	35.8305
UniProtKB:O95793	Double-stranded RNA-binding protein Staufen homolog 1 OS=Homo sapiens GN=STAU1 PE=1 SV=2	705.904	46.1	1	19	20	29	2581170273	63.1428
UniProtKB:O00273	DNA fragmentation factor subunit alpha OS=Homo sapiens GN=DFFA PE=1 SV=1	705.5	51.06	1	14	14	21	4.05681e+09	36.4995
UniProtKB:P19367	Hexokinase-1 OS=Homo sapiens GN=HK1 PE=1 SV=3	705.009	20.5	1	14	16	21	1.74872e+09	102.42
UniProtKB:Q9UI26	Importin-11 OS=Homo sapiens GN=IPO11 PE=1 SV=1	701.12	19.18	1	13	13	19	1.54145e+09	112.463
UniProtKB:Q14444	Caprin-1 OS=Homo sapiens GN=CAPRIN1 PE=1 SV=2	700.947	26.23	1	11	11	21	5.24552e+09	78.318
UniProtKB:P12955	Xaa-Pro dipeptidase OS=Homo sapiens GN=PEPD PE=1 SV=3	699.342	31.64	1	12	12	20	2076066341	54.5129
UniProtKB:P30520	Adenylosuccinate synthetase isozyme 2 OS=Homo sapiens GN=ADSS PE=1 SV=3	699.299	47.37	1	17	17	22	4998153992	50.0658
UniProtKB:Q5SNT6	WASH complex subunit FAM21B OS=Homo sapiens GN=FAM21B PE=1 SV=2	696.772	13.97	1	0	10	13	8.89626e+08	136.887
UniProtKB:Q15819	Ubiquitin-conjugating enzyme E2 variant 2 OS=Homo sapiens GN=UBE2V2 PE=1 SV=4	696.659	64.14	1	3	8	17	6.95683e+09	16.3522
UniProtKB:P42285	Superkiller viralicidic activity 2-like 2 OS=Homo sapiens GN=SKIV2L2 PE=1 SV=3	696.059	29.08	1	25	25	33	3107602790	117.729
UniProtKB:Q13123	Protein Red OS=Homo sapiens GN=IK PE=1 SV=3	694.957	30.34	1	15	15	22	1.26157e+09	65.5618
UniProtKB:P00505	Aspartate aminotransferase, mitochondrial OS=Homo sapiens GN=GOT2 PE=1 SV=3	693.402	35.12	1	13	13	22	6.36514e+09	47.4873
UniProtKB:Q16181	Septin-7 OS=Homo sapiens GN=SEPT7 PE=1 SV=2	693.359	38.67	1	12	13	24	3.34352e+09	50.648
UniProtKB:Q9Y4E1	WASH complex subunit FAM21C OS=Homo sapiens GN=FAM21C PE=1 SV=3	691.207	14.57	1	0	11	15	8.89626e+08	144.581
UniProtKB:O60749	Sorting nexin-2 OS=Homo sapiens GN=SNX2 PE=1 SV=2	691.055	34.3	1	14	16	24	2.91632e+09	58.4347
UniProtKB:P35609	Alpha-actinin-2 OS=Homo sapiens GN=ACTN2 PE=1 SV=1	689.815	11.07	1	0	8	18	9.57997e+09	103.788
UniProtKB:Q7Z406	Myosin-14 OS=Homo sapiens GN=MYH14 PE=1 SV=1	689.384	8.57	1	6	15	22	3.59845e+09	227.863
UniProtKB:Q15717	ELAV-like protein 1 OS=Homo sapiens GN=ELAVL1 PE=1 SV=2	688.409	53.99	1	14	15	26	1.02646e+10	36.0692
UniProtKB:Q99666	RANBP2-like and GRIP domain-containing protein 5/6 OS=Homo sapiens GN=RGPD5 PE=1 SV=3	683.503	12.69	1	1	18	22	1.1082e+09	198.8
UniProtKB:Q29RF7	Sister chromatid cohesion protein PDS5 homolog A OS=Homo sapiens GN=PDS5A PE=1 SV=1	682.757	14.81	1	11	13	17	5.66497e+08	150.734
UniProtKB:P56192	Methionyl-tRNA synthetase, cytoplasmic OS=Homo sapiens GN=MARS PE=1 SV=2	682.306	33.89	1	20	20	24	6626877400	101.052
UniProtKB:P41240	Tyrosine-protein kinase CSK OS=Homo sapiens GN=CSK PE=1 SV=1	681.545	40	1	13	14	17	739063752	50.6717
UniProtKB:P11413	Glucose-6-phosphate 1-dehydrogenase OS=Homo sapiens GN=G6PD PE=1 SV=4	680.959	41.36	1	19	19	31	4.92811e+09	59.219
UniProtKB:Q9NR45	Sialic acid synthase OS=Homo sapiens GN=NANS PE=1 SV=2	680.259	48.19	1	14	14	22	2790335645	40.2815
UniProtKB:O60716	Catenin delta-1 OS=Homo sapiens GN=CTNND1 PE=1 SV=1	680.072	25.93	1	18	18	23	1.69095e+09	108.103
UniProtKB:Q96GQ7	Probable ATP-dependent RNA helicase DDX27 OS=Homo sapiens GN=DDX27 PE=1 SV=2	679.182	17.71	1	13	13	19	1.61239e+09	89.7792
UniProtKB:Q01581	Hydroxymethylglutaryl-CoA synthase, cytoplasmic OS=Homo sapiens GN=HMGCS1 PE=1 SV=2	678.399	38.46	1	14	15	23	2.72104e+09	57.2574
UniProtKB:Q6IBS0	Twinfilin-2 OS=Homo sapiens GN=TWF2 PE=1 SV=2	675.364	55.87	1	12	13	19	3.34564e+09	39.5233
UniProtKB:Q15075	Early endosome antigen 1 OS=Homo sapiens GN=EEA1 PE=1 SV=2	675.272	14.32	1	19	19	23	947397051	162.367
UniProtKB:Q9GZS3	WD repeat-containing protein 61 OS=Homo sapiens GN=WDR61 PE=1 SV=1	675	44.59	1	8	8	20	2.81707e+09	33.5598
UniProtKB:Q12792	Twinfilin-1 OS=Homo sapiens GN=TWF1 PE=1 SV=3	674.284	41.71	1	11	12	19	3082629198	40.2577
UniProtKB:Q7L576	Cytoplasmic FMR1-interacting protein 1 OS=Homo sapiens GN=CYFIP1 PE=1 SV=1	673.967	20.59	1	13	23	29	1.8812e+09	145.089
UniProtKB:P39748	Flap endonuclease 1 OS=Homo sapiens GN=FEN1 PE=1 SV=1	672.61	41.84	1	12	12	18	3768969936	42.5661
UniProtKB:P82970	High mobility group nucleosome-binding domain-containing protein 5 OS=Homo sapiens GN=HMGN5 PE=1 SV=1	671.732	34.75	1	8	8	20	3.84689e+09	31.5059
UniProtKB:P07954	Fumarate hydratase, mitochondrial OS=Homo sapiens GN=FH PE=1 SV=3	671.095	45.49	1	15	15	20	2.51899e+09	54.6022
UniProtKB:Q9GZR7	ATP-dependent RNA helicase DDX24 OS=Homo sapiens GN=DDX24 PE=1 SV=1	667.504	26.31	1	17	17	22	8.5604e+08	96.2715
UniProtKB:P51665	26S proteasome non-ATPase regulatory subunit 7 OS=Homo sapiens GN=PSMD7 PE=1 SV=2	667.489	38.89	1	9	9	20	3.77709e+09	37.0025
UniProtKB:Q9NXV6	CDKN2A-interacting protein OS=Homo sapiens GN=CDKN2AIP PE=1 SV=2	666.666	22.63	1	8	8	10	2.60189e+08	61.0168
UniProtKB:Q92688	Acidic leucine-rich nuclear phosphoprotein 32 family member B OS=Homo sapiens GN=ANP32B PE=1 SV=1	666.427	32.67	1	4	9	26	2.08436e+10	28.7703
UniProtKB:O43684	Mitotic checkpoint protein BUB3 OS=Homo sapiens GN=BUB3 PE=1 SV=1	665.592	58.23	1	14	14	24	7.46663e+09	37.1312
UniProtKB:O60282	Kinesin heavy chain isoform 5C OS=Homo sapiens GN=KIF5C PE=1 SV=1	665.243	14.84	1	4	10	14	1.41943e+09	109.427
UniProtKB:Q13526	Peptidyl-prolyl cis-trans isomerase NIMA-interacting 1 OS=Homo sapiens GN=PIN1 PE=1 SV=1	663.914	38.04	1	5	5	14	1.8804e+09	18.232
UniProtKB:Q16881	Thioredoxin reductase 1, cytoplasmic OS=Homo sapiens GN=TXNRD1 PE=1 SV=3	663.809	34.67	1	19	19	23	4.41127e+09	70.8622
UniProtKB:Q9UPT8	Zinc finger CCCH domain-containing protein 4 OS=Homo sapiens GN=ZC3H4 PE=1 SV=3	660.074	12.89	1	9	10	15	1.33729e+09	140.169
UniProtKB:Q9H9A6	Leucine-rich repeat-containing protein 40 OS=Homo sapiens GN=LRRC40 PE=1 SV=1	659.288	34.55	1	16	16	22	1.18875e+09	68.2071
UniProtKB:O75717	WD repeat and HMG-box DNA-binding protein 1 OS=Homo sapiens GN=WDHD1 PE=1 SV=1	658.754	17.8	1	15	15	19	8.86002e+08	125.888
UniProtKB:P67775	Serine/threonine-protein phosphatase 2A catalytic subunit alpha isoform OS=Homo sapiens GN=PPP2CA PE=1 SV=1	658.46	55.02	1	1	11	15	3.32431e+09	35.5714
UniProtKB:Q9H0U4	Ras-related protein Rab-1B OS=Homo sapiens GN=RAB1B PE=1 SV=1	657.681	52.74	1	2	11	22	1.0252e+10	22.1572
UniProtKB:P12081	Histidyl-tRNA synthetase, cytoplasmic OS=Homo sapiens GN=HARS PE=1 SV=2	657.287	54.42	1	17	23	27	4.75401e+09	57.3742
UniProtKB:O43504	Hepatitis B virus X-interacting protein OS=Homo sapiens GN=HBXIP PE=1 SV=1	656.786	96.7	1	5	5	12	3.08525e+09	9.60772
UniProtKB:P34897	Serine hydroxymethyltransferase, mitochondrial OS=Homo sapiens GN=SHMT2 PE=1 SV=3	656.753	40.28	1	16	17	22	3443791440	55.9577
UniProtKB:O00303	Eukaryotic translation initiation factor 3 subunit F OS=Homo sapiens GN=EIF3F PE=1 SV=1	656.495	36.13	1	12	12	22	4.99799e+09	37.5402
UniProtKB:O14617	AP-3 complex subunit delta-1 OS=Homo sapiens GN=AP3D1 PE=1 SV=1	655.778	14.05	1	13	13	17	1317355143	130.076
UniProtKB:P43034	Platelet-activating factor acetylhydrolase IB subunit alpha OS=Homo sapiens GN=PAFAH1B1 PE=1 SV=2	654.412	37.07	1	13	14	24	3.04685e+09	46.6082
UniProtKB:O94776	Metastasis-associated protein MTA2 OS=Homo sapiens GN=MTA2 PE=1 SV=1	654.285	35.93	1	15	18	23	1.9328e+09	74.9757
UniProtKB:P22059	Oxysterol-binding protein 1 OS=Homo sapiens GN=OSBP PE=1 SV=1	653.801	22.68	1	12	13	16	2.1651e+09	89.3646
UniProtKB:P62333	26S protease regulatory subunit 10B OS=Homo sapiens GN=PSMC6 PE=1 SV=1	652.73	52.44	1	15	15	23	6.08388e+09	44.1451
UniProtKB:P49189	4-trimethylaminobutyraldehyde dehydrogenase OS=Homo sapiens GN=ALDH9A1 PE=1 SV=3	652.512	37.25	1	16	16	25	3894816264	53.767
UniProtKB:Q13547	Histone deacetylase 1 OS=Homo sapiens GN=HDAC1 PE=1 SV=1	651.775	35.48	1	8	13	22	6.10685e+09	55.0677
UniProtKB:P39687	Acidic leucine-rich nuclear phosphoprotein 32 family member A OS=Homo sapiens GN=ANP32A PE=1 SV=1	651.753	30.52	1	4	9	24	1.77977e+10	28.5683
UniProtKB:P15927	Replication protein A 32 kDa subunit OS=Homo sapiens GN=RPA2 PE=1 SV=1	651.662	55.93	1	9	9	22	1.0739e+10	29.2285
UniProtKB:P33240	Cleavage stimulation factor subunit 2 OS=Homo sapiens GN=CSTF2 PE=1 SV=1	651.572	28.77	1	8	11	19	4.55192e+09	60.9205
UniProtKB:Q02750	Dual specificity mitogen-activated protein kinase kinase 1 OS=Homo sapiens GN=MAP2K1 PE=1 SV=2	649.766	40.2	1	9	12	19	2.20625e+09	43.4113
UniProtKB:P62266	40S ribosomal protein S23 OS=Homo sapiens GN=RPS23 PE=1 SV=3	649.403	48.95	1	7	7	17	1.13488e+10	15.7977
UniProtKB:P45973	Chromobox protein homolog 5 OS=Homo sapiens GN=CBX5 PE=1 SV=1	649.143	48.17	1	8	9	18	6136652676	22.2111
UniProtKB:O43290	U4/U6.U5 tri-snRNP-associated protein 1 OS=Homo sapiens GN=SART1 PE=1 SV=1	649.122	23.75	1	12	12	17	1.40652e+09	90.2003
UniProtKB:P35222	Catenin beta-1 OS=Homo sapiens GN=CTNNB1 PE=1 SV=1	648.33	29.19	1	13	15	18	2.13484e+09	85.4422
UniProtKB:P06132	Uroporphyrinogen decarboxylase OS=Homo sapiens GN=UROD PE=1 SV=2	648.134	37.06	1	9	9	16	1.27277e+09	40.7608
UniProtKB:Q9UHD1	Cysteine and histidine-rich domain-containing protein 1 OS=Homo sapiens GN=CHORDC1 PE=1 SV=2	647.133	39.76	1	10	10	24	7.81303e+09	37.4656
UniProtKB:P25440	Bromodomain-containing protein 2 OS=Homo sapiens GN=BRD2 PE=1 SV=2	646.633	31.21	1	12	15	20	3780159936	88.0063
UniProtKB:O75607	Nucleoplasmin-3 OS=Homo sapiens GN=NPM3 PE=1 SV=3	646.567	51.69	1	6	6	13	4193288474	19.3314
UniProtKB:Q96T23	Remodeling and spacing factor 1 OS=Homo sapiens GN=RSF1 PE=1 SV=2	646.097	12.63	1	13	13	18	9.95589e+08	163.72
UniProtKB:Q01813	6-phosphofructokinase type C OS=Homo sapiens GN=PFKP PE=1 SV=2	645.946	23.98	1	11	14	18	1.66675e+09	85.5415
UniProtKB:P31153	S-adenosylmethionine synthase isoform type-2 OS=Homo sapiens GN=MAT2A PE=1 SV=1	642.327	31.65	1	7	9	18	9572626464	43.6333
UniProtKB:Q9Y5S9	RNA-binding protein 8A OS=Homo sapiens GN=RBM8A PE=1 SV=1	642.058	47.13	1	7	7	14	8.14614e+09	19.8767
UniProtKB:Q9H8Y8	Golgi reassembly-stacking protein 2 OS=Homo sapiens GN=GORASP2 PE=1 SV=3	640.78	20.13	1	6	6	13	1943872558	47.116
UniProtKB:P54920	Alpha-soluble NSF attachment protein OS=Homo sapiens GN=NAPA PE=1 SV=3	639.504	63.73	1	12	13	18	1.65329e+09	33.2113
UniProtKB:Q9HB07	UPF0160 protein MYG1, mitochondrial OS=Homo sapiens GN=C12orf10 PE=1 SV=2	638.207	41.76	1	11	11	19	2741148648	42.4224
UniProtKB:O75663	TIP41-like protein OS=Homo sapiens GN=TIPRL PE=1 SV=2	637.385	53.31	1	10	10	21	4.827e+09	31.4237
UniProtKB:P62714	Serine/threonine-protein phosphatase 2A catalytic subunit beta isoform OS=Homo sapiens GN=PPP2CB PE=1 SV=1	636.586	53.4	1	1	11	15	2.00892e+09	35.5523
UniProtKB:O14715	RANBP2-like and GRIP domain-containing protein 8 OS=Homo sapiens GN=RGPD8 PE=1 SV=2	636.046	11.9	1	0	17	21	1.1082e+09	198.869
UniProtKB:A6NKT7	RanBP2-like and GRIP domain-containing protein 3 OS=Homo sapiens GN=RGPD3 PE=2 SV=1	635.891	12.4	1	0	18	22	1.1082e+09	198.27
UniProtKB:P62304	Small nuclear ribonucleoprotein E OS=Homo sapiens GN=SNRPE PE=1 SV=1	635.69	52.17	1	1	3	11	9079493702	10.7966
UniProtKB:P05141	ADP/ATP translocase 2 OS=Homo sapiens GN=SLC25A5 PE=1 SV=6	635.666	48.66	1	5	15	30	7.73793e+09	32.8742
UniProtKB:Q9UK76	Hematological and neurological expressed 1 protein OS=Homo sapiens GN=HN1 PE=1 SV=3	635.31	75.32	1	7	7	13	1.67837e+10	16.0049
UniProtKB:Q13045	Protein flightless-1 homolog OS=Homo sapiens GN=FLII PE=1 SV=2	633.442	13.48	1	11	11	12	6.90553e+08	144.66
UniProtKB:P15170	Eukaryotic peptide chain release factor GTP-binding subunit ERF3A OS=Homo sapiens GN=GSPT1 PE=1 SV=1	633.391	35.67	1	9	17	29	6.63573e+09	55.7203
UniProtKB:Q15417	Calponin-3 OS=Homo sapiens GN=CNN3 PE=1 SV=1	633.062	27.66	1	8	8	19	3.52871e+09	36.3908
UniProtKB:P19105	Myosin regulatory light chain 12A OS=Homo sapiens GN=MYL12A PE=1 SV=2	632.783	51.46	1	0	12	24	7701467736	19.7815
UniProtKB:O14950	Myosin regulatory light chain 12B OS=Homo sapiens GN=MYL12B PE=1 SV=2	632.783	51.16	1	0	12	24	7701467736	19.7665
UniProtKB:O60739	Eukaryotic translation initiation factor 1b OS=Homo sapiens GN=EIF1B PE=1 SV=2	632.065	60.18	1	1	5	13	1.12151e+10	12.8157
UniProtKB:P52789	Hexokinase-2 OS=Homo sapiens GN=HK2 PE=1 SV=2	632.016	26.94	1	19	21	26	1232603930	102.313
UniProtKB:Q7Z4V5	Hepatoma-derived growth factor-related protein 2 OS=Homo sapiens GN=HDGFRP2 PE=1 SV=1	631.736	18.63	1	7	8	20	6.38957e+09	74.2722
UniProtKB:Q9H2U2	Inorganic pyrophosphatase 2, mitochondrial OS=Homo sapiens GN=PPA2 PE=1 SV=2	631.66	37.43	1	9	10	20	5841576115	37.896
UniProtKB:P17655	Calpain-2 catalytic subunit OS=Homo sapiens GN=CAPN2 PE=1 SV=5	631.559	25.71	1	11	11	17	2078326162	79.9588
UniProtKB:Q16204	Coiled-coil domain-containing protein 6 OS=Homo sapiens GN=CCDC6 PE=1 SV=2	631.047	31.65	1	11	11	18	1.24961e+09	53.2578
UniProtKB:O14974	Protein phosphatase 1 regulatory subunit 12A OS=Homo sapiens GN=PPP1R12A PE=1 SV=1	631.014	17.28	1	14	14	19	1.20422e+09	115.211
UniProtKB:Q9Y536	Peptidylprolyl cis-trans isomerase A-like 4A/B/C OS=Homo sapiens GN=PPIAL4A PE=1 SV=1	629.028	16.46	1	0	3	28	3.89893e+10	18.1702
UniProtKB:P63162	Small nuclear ribonucleoprotein-associated protein N OS=Homo sapiens GN=SNRPN PE=1 SV=1	627.971	25	1	0	8	26	11974533433	24.598
UniProtKB:P14678	Small nuclear ribonucleoprotein-associated proteins B and B' OS=Homo sapiens GN=SNRPB PE=1 SV=2	627.971	25	1	0	8	26	11974533433	24.5937
UniProtKB:Q9Y5A9	YTH domain family protein 2 OS=Homo sapiens GN=YTHDF2 PE=1 SV=2	627.905	27.63	1	9	13	20	5809126644	62.2957
UniProtKB:P28340	DNA polymerase delta catalytic subunit OS=Homo sapiens GN=POLD1 PE=1 SV=2	626.818	19.24	1	16	16	18	1.60564e+09	123.553
UniProtKB:Q10570	Cleavage and polyadenylation specificity factor subunit 1 OS=Homo sapiens GN=CPSF1 PE=1 SV=2	626.35	18.3	1	20	20	21	1.39525e+09	160.782
UniProtKB:Q15061	WD repeat-containing protein 43 OS=Homo sapiens GN=WDR43 PE=1 SV=3	625.022	24.67	1	15	15	27	3.16672e+09	74.8434
UniProtKB:P52565	Rho GDP-dissociation inhibitor 1 OS=Homo sapiens GN=ARHGDIA PE=1 SV=3	623.685	41.67	1	7	7	23	1.19285e+10	23.1927
UniProtKB:O00425	Insulin-like growth factor 2 mRNA-binding protein 3 OS=Homo sapiens GN=IGF2BP3 PE=1 SV=2	623.682	31.26	1	13	14	19	3.45969e+09	63.6656
UniProtKB:O43765	Small glutamine-rich tetratricopeptide repeat-containing protein alpha OS=Homo sapiens GN=SGTA PE=1 SV=1	623.462	41.85	1	12	12	20	6.27362e+09	34.0417
UniProtKB:P25788	Proteasome subunit alpha type-3 OS=Homo sapiens GN=PSMA3 PE=1 SV=2	622.146	42.35	1	10	10	23	8009612012	28.4151
UniProtKB:P53992	Protein transport protein Sec24C OS=Homo sapiens GN=SEC24C PE=1 SV=3	621.479	20.29	1	15	15	23	1595303707	118.249
UniProtKB:Q9Y285	Phenylalanyl-tRNA synthetase alpha chain OS=Homo sapiens GN=FARSA PE=1 SV=3	621.427	33.46	1	11	11	18	4.91555e+09	57.5275
UniProtKB:Q4G0J3	La-related protein 7 OS=Homo sapiens GN=LARP7 PE=1 SV=1	620.906	25.77	1	13	13	18	1.28577e+09	66.8574
UniProtKB:Q92769	Histone deacetylase 2 OS=Homo sapiens GN=HDAC2 PE=1 SV=2	619.948	32.38	1	8	13	21	5.74904e+09	55.3288
UniProtKB:Q9BTW9	Tubulin-specific chaperone D OS=Homo sapiens GN=TBCD PE=1 SV=2	619.798	17.03	1	14	14	16	1.95067e+09	132.515
UniProtKB:P35269	General transcription factor IIF subunit 1 OS=Homo sapiens GN=GTF2F1 PE=1 SV=2	619.739	25.92	1	11	11	13	2.15675e+09	58.2051
UniProtKB:Q13162	Peroxiredoxin-4 OS=Homo sapiens GN=PRDX4 PE=1 SV=1	617.02	51.29	1	10	11	40	1.0958e+10	30.5208
UniProtKB:P52926	High mobility group protein HMGI-C OS=Homo sapiens GN=HMGA2 PE=1 SV=1	614.953	29.36	1	3	3	13	1.63935e+09	11.8251
UniProtKB:P46379	Large proline-rich protein BAT3 OS=Homo sapiens GN=BAT3 PE=1 SV=2	614.685	22.7	1	18	18	28	4.4307e+09	119.334
UniProtKB:P49790	Nuclear pore complex protein Nup153 OS=Homo sapiens GN=NUP153 PE=1 SV=2	613.085	14.71	1	14	14	15	1.28028e+09	153.843
UniProtKB:Q12972	Nuclear inhibitor of protein phosphatase 1 OS=Homo sapiens GN=PPP1R8 PE=1 SV=2	612.807	46.72	1	11	11	18	3.04939e+09	38.4548
UniProtKB:Q7L5N1	COP9 signalosome complex subunit 6 OS=Homo sapiens GN=COPS6 PE=1 SV=1	612.703	38.84	1	9	9	17	1.77786e+09	36.1402
UniProtKB:Q13243	Serine/arginine-rich splicing factor 5 OS=Homo sapiens GN=SRSF5 PE=1 SV=1	612.383	25.37	1	5	6	20	7446215342	31.2453
UniProtKB:O14579	Coatomer subunit epsilon OS=Homo sapiens GN=COPE PE=1 SV=3	612.324	67.53	1	13	13	18	6.08627e+09	34.4603
UniProtKB:P35611	Alpha-adducin OS=Homo sapiens GN=ADD1 PE=1 SV=2	611.14	22.12	1	14	15	24	1.86416e+09	80.9047
UniProtKB:Q9Y6E2	Basic leucine zipper and W2 domain-containing protein 2 OS=Homo sapiens GN=BZW2 PE=1 SV=1	610.095	36.04	1	12	14	22	2443920532	48.132
UniProtKB:O60216	Double-strand-break repair protein rad21 homolog OS=Homo sapiens GN=RAD21 PE=1 SV=2	609.993	24.56	1	10	12	17	9.60577e+08	71.6447
UniProtKB:Q5VT52	Regulation of nuclear pre-mRNA domain-containing protein 2 OS=Homo sapiens GN=RPRD2 PE=1 SV=1	609.768	16.84	1	13	13	18	1.26322e+09	155.924
UniProtKB:Q9Y6M1	Insulin-like growth factor 2 mRNA-binding protein 2 OS=Homo sapiens GN=IGF2BP2 PE=1 SV=2	609.496	25.38	1	9	11	22	3.10627e+09	66.0806
UniProtKB:Q01469	Fatty acid-binding protein, epidermal OS=Homo sapiens GN=FABP5 PE=1 SV=3	608.781	65.19	1	7	8	16	6.19453e+09	15.1546
UniProtKB:Q9NRH3	Tubulin gamma-2 chain OS=Homo sapiens GN=TUBG2 PE=1 SV=1	607.976	33.26	1	0	11	15	2.57238e+09	51.0596
UniProtKB:Q15942	Zyxin OS=Homo sapiens GN=ZYX PE=1 SV=1	607.932	32.87	1	13	13	25	5236855997	61.2382
UniProtKB:Q9UKF6	Cleavage and polyadenylation specificity factor subunit 3 OS=Homo sapiens GN=CPSF3 PE=1 SV=1	607.407	35.09	1	17	17	20	1.01664e+09	77.4362
UniProtKB:P13804	Electron transfer flavoprotein subunit alpha, mitochondrial OS=Homo sapiens GN=ETFA PE=1 SV=1	606.445	50.15	1	12	12	20	3.2888e+09	35.0576
UniProtKB:O60684	Importin subunit alpha-7 OS=Homo sapiens GN=KPNA6 PE=1 SV=1	604.961	30.97	1	7	16	23	3.25766e+09	59.9915
UniProtKB:P51532	Transcription activator BRG1 OS=Homo sapiens GN=SMARCA4 PE=1 SV=2	604.14	11.66	1	9	15	21	1.6668e+09	184.53
UniProtKB:Q13733	Sodium/potassium-transporting ATPase subunit alpha-4 OS=Homo sapiens GN=ATP1A4 PE=1 SV=3	604.127	8.65	1	0	7	16	4.63535e+09	114.093
UniProtKB:Q9NQ29	Putative RNA-binding protein Luc7-like 1 OS=Homo sapiens GN=LUC7L PE=1 SV=1	601.436	38.01	1	8	13	29	8.53398e+09	43.7013
UniProtKB:Q5H9R7	Serine/threonine-protein phosphatase 6 regulatory subunit 3 OS=Homo sapiens GN=PPP6R3 PE=1 SV=2	600.74	18.79	1	13	14	22	1.76767e+09	97.6076
UniProtKB:Q15269	Periodic tryptophan protein 2 homolog OS=Homo sapiens GN=PWP2 PE=1 SV=2	599.846	21.44	1	15	15	21	1.63157e+09	102.387
UniProtKB:Q93050	V-type proton ATPase 116 kDa subunit a isoform 1 OS=Homo sapiens GN=ATP6V0A1 PE=1 SV=3	599.8	15.41	1	11	11	20	9.16526e+08	96.3501
UniProtKB:O14745	Na(+)/H(+) exchange regulatory cofactor NHE-RF1 OS=Homo sapiens GN=SLC9A3R1 PE=1 SV=4	599.475	44.41	1	10	10	16	2.40958e+09	38.8446
UniProtKB:P33316	Deoxyuridine 5'-triphosphate nucleotidohydrolase, mitochondrial OS=Homo sapiens GN=DUT PE=1 SV=3	599.12	43.25	1	9	9	16	7.13613e+09	26.6897
UniProtKB:Q5SRE5	Nucleoporin NUP188 homolog OS=Homo sapiens GN=NUP188 PE=1 SV=1	598.398	11.21	1	15	15	17	1.24517e+09	195.917
UniProtKB:P31350	Ribonucleoside-diphosphate reductase subunit M2 OS=Homo sapiens GN=RRM2 PE=1 SV=1	595.954	40.1	1	13	15	24	2599352098	44.8488
UniProtKB:Q13867	Bleomycin hydrolase OS=Homo sapiens GN=BLMH PE=1 SV=1	595.17	32.31	1	11	11	16	1.67954e+09	52.528
UniProtKB:Q9BZZ5	Apoptosis inhibitor 5 OS=Homo sapiens GN=API5 PE=1 SV=2	594.192	37.45	1	16	16	21	7.33816e+09	57.5251
UniProtKB:P40925	Malate dehydrogenase, cytoplasmic OS=Homo sapiens GN=MDH1 PE=1 SV=4	594.056	35.03	1	10	10	23	1.30133e+10	36.403
UniProtKB:P21281	V-type proton ATPase subunit B, brain isoform OS=Homo sapiens GN=ATP6V1B2 PE=1 SV=3	593.159	36.79	1	9	14	19	1923628860	56.4649
UniProtKB:O60884	DnaJ homolog subfamily A member 2 OS=Homo sapiens GN=DNAJA2 PE=1 SV=1	591.219	49.51	1	14	14	17	6.12125e+09	45.7166
UniProtKB:Q96T76	MMS19 nucleotide excision repair protein homolog OS=Homo sapiens GN=MMS19 PE=1 SV=2	591.153	22.52	1	15	15	18	1.72316e+09	113.217
UniProtKB:Q7Z3J3	RanBP2-like and GRIP domain-containing protein 4 OS=Homo sapiens GN=RGPD4 PE=2 SV=2	590.919	11.27	1	0	16	20	1.03589e+09	198.072
UniProtKB:Q15645	Thyroid receptor-interacting protein 13 OS=Homo sapiens GN=TRIP13 PE=1 SV=2	590.026	39.12	1	14	14	20	1.96988e+09	48.5205
UniProtKB:Q99567	Nuclear pore complex protein Nup88 OS=Homo sapiens GN=NUP88 PE=1 SV=2	589.57	22.27	1	10	10	14	1.23568e+09	83.4888
UniProtKB:Q9NVH2	Integrator complex subunit 7 OS=Homo sapiens GN=INTS7 PE=1 SV=1	589.22	9.56	1	5	5	10	3.5846e+08	106.766
UniProtKB:P58107	Epiplakin OS=Homo sapiens GN=EPPK1 PE=1 SV=2	588.875	18.66	1	11	14	19	1.74547e+09	555.279
UniProtKB:O96019	Actin-like protein 6A OS=Homo sapiens GN=ACTL6A PE=1 SV=1	588.223	46.62	1	12	14	17	1.98013e+09	47.4303
UniProtKB:P56537	Eukaryotic translation initiation factor 6 OS=Homo sapiens GN=EIF6 PE=1 SV=1	587.532	56.73	1	8	8	18	6.38511e+09	26.5822
UniProtKB:P18621	60S ribosomal protein L17 OS=Homo sapiens GN=RPL17 PE=1 SV=3	586.886	43.48	1	8	8	25	2.19276e+10	21.3833
UniProtKB:Q9H773	dCTP pyrophosphatase 1 OS=Homo sapiens GN=DCTPP1 PE=1 SV=1	585.796	68.24	1	14	14	22	6.12628e+09	18.6694
UniProtKB:Q9BXV9	Uncharacterized protein C14orf142 OS=Homo sapiens GN=C14orf142 PE=2 SV=2	584.121	85	1	5	5	11	1.22973e+09	10.8521
UniProtKB:Q07065	Cytoskeleton-associated protein 4 OS=Homo sapiens GN=CKAP4 PE=1 SV=2	583.791	23.09	1	10	10	11	590767171	65.9827
UniProtKB:Q8WUH6	UPF0444 transmembrane protein C12orf23 OS=Homo sapiens GN=C12orf23 PE=1 SV=1	583.212	65.52	1	5	5	14	1.66925e+09	11.7411
UniProtKB:Q8N1G4	Leucine-rich repeat-containing protein 47 OS=Homo sapiens GN=LRRC47 PE=1 SV=1	582.795	32.42	1	14	14	18	2618442912	63.4337
UniProtKB:Q8WXF1	Paraspeckle component 1 OS=Homo sapiens GN=PSPC1 PE=1 SV=1	582.371	23.9	1	11	11	19	6.02154e+09	58.7062
UniProtKB:P21108	Ribose-phosphate pyrophosphokinase 3 OS=Homo sapiens GN=PRPS1L1 PE=1 SV=2	581.522	28.3	1	0	8	17	1.28568e+10	34.817
UniProtKB:Q9NWV8	BRCA1-A complex subunit MERIT40 OS=Homo sapiens GN=MERIT40 PE=1 SV=1	581.48	24.62	1	5	5	10	813893270	36.5366
UniProtKB:P62888	60S ribosomal protein L30 OS=Homo sapiens GN=RPL30 PE=1 SV=2	580.844	71.3	1	9	9	20	2.03313e+10	12.7757
UniProtKB:P47755	F-actin-capping protein subunit alpha-2 OS=Homo sapiens GN=CAPZA2 PE=1 SV=3	578.356	53.85	1	8	9	15	8.19622e+09	32.9286
UniProtKB:Q9HC38	Glyoxalase domain-containing protein 4 OS=Homo sapiens GN=GLOD4 PE=1 SV=1	577.825	63.58	1	15	15	21	5.07205e+09	34.7713
UniProtKB:O14776	Transcription elongation regulator 1 OS=Homo sapiens GN=TCERG1 PE=1 SV=2	577.673	18.58	1	19	19	23	1.93526e+09	123.823
UniProtKB:Q8NFC6	Biorientation of chromosomes in cell division protein 1-like OS=Homo sapiens GN=BOD1L PE=1 SV=2	576.873	5.34	1	10	11	15	4.60201e+08	330.266
UniProtKB:Q8TAT6	Nuclear protein localization protein 4 homolog OS=Homo sapiens GN=NPLOC4 PE=1 SV=3	574.399	28.62	1	12	12	18	1.72976e+09	68.0769
UniProtKB:O15042	U2-associated protein SR140 OS=Homo sapiens GN=SR140 PE=1 SV=2	573.326	19.05	1	15	15	21	2.94818e+09	118.219
UniProtKB:Q9ULC4	Malignant T cell-amplified sequence 1 OS=Homo sapiens GN=MCTS1 PE=1 SV=1	572.963	51.38	1	7	7	20	5149771846	20.5418
UniProtKB:O43583	Density-regulated protein OS=Homo sapiens GN=DENR PE=1 SV=2	571.204	35.35	1	6	6	9	2.55105e+09	22.0781
UniProtKB:P30419	Glycylpeptide N-tetradecanoyltransferase 1 OS=Homo sapiens GN=NMT1 PE=1 SV=2	571.178	30.44	1	9	11	18	2767258834	56.7699
UniProtKB:Q08752	Peptidyl-prolyl cis-trans isomerase D OS=Homo sapiens GN=PPID PE=1 SV=3	570.479	45.14	1	14	15	21	1608576510	40.7379
UniProtKB:O00178	GTP-binding protein 1 OS=Homo sapiens GN=GTPBP1 PE=1 SV=3	569.627	32.59	1	15	15	19	1356475586	72.408
Ensembl:CON_ENSBTAP00000024146	(Bos taurus) similar to alpha-2-macroglobulin isoform 1	569.52	13.61	1	14	16	21	5374059427	164.239
UniProtKB:O43432	Eukaryotic translation initiation factor 4 gamma 3 OS=Homo sapiens GN=EIF4G3 PE=1 SV=2	569.043	10.79	1	10	16	23	3.561e+09	176.542
UniProtKB:P57740	Nuclear pore complex protein Nup107 OS=Homo sapiens GN=NUP107 PE=1 SV=1	568.105	29.62	1	19	19	20	1.41389e+09	106.307
UniProtKB:P09884	DNA polymerase alpha catalytic subunit OS=Homo sapiens GN=POLA1 PE=1 SV=2	566.923	12.65	1	13	13	16	1.31836e+09	165.807
UniProtKB:P62263	40S ribosomal protein S14 OS=Homo sapiens GN=RPS14 PE=1 SV=3	566.167	66.89	1	10	10	23	1.3931e+10	16.2625
UniProtKB:Q5VTR2	E3 ubiquitin-protein ligase BRE1A OS=Homo sapiens GN=RNF20 PE=1 SV=2	566.053	18.67	1	16	16	19	1.85162e+09	113.592
UniProtKB:Q7Z3B4	Nucleoporin p54 OS=Homo sapiens GN=NUP54 PE=1 SV=2	565.653	30.57	1	14	14	16	1.85596e+09	55.4014
UniProtKB:Q9NY33	Dipeptidyl peptidase 3 OS=Homo sapiens GN=DPP3 PE=1 SV=2	565.436	22.66	1	10	10	15	2.50128e+09	82.5378
UniProtKB:P40937	Replication factor C subunit 5 OS=Homo sapiens GN=RFC5 PE=1 SV=1	565.305	39.41	1	13	13	17	2.39283e+09	38.4722
UniProtKB:Q15042	Rab3 GTPase-activating protein catalytic subunit OS=Homo sapiens GN=RAB3GAP1 PE=1 SV=3	565.199	21.51	1	17	17	22	1.10918e+09	110.454
UniProtKB:P16403	Histone H1.2 OS=Homo sapiens GN=HIST1H1C PE=1 SV=2	565.198	27.23	1	1	8	25	4.7459e+10	21.3517
UniProtKB:Q14677	Clathrin interactor 1 OS=Homo sapiens GN=CLINT1 PE=1 SV=1	565.031	24.8	1	13	13	19	2.57542e+09	68.2158
UniProtKB:P61421	V-type proton ATPase subunit d 1 OS=Homo sapiens GN=ATP6V0D1 PE=1 SV=1	565	37.32	1	8	8	11	1.73071e+09	40.3032
UniProtKB:Q96HC4	PDZ and LIM domain protein 5 OS=Homo sapiens GN=PDLIM5 PE=1 SV=4	564.915	39.43	1	17	17	25	2.00631e+09	63.9615
UniProtKB:P46783	40S ribosomal protein S10 OS=Homo sapiens GN=RPS10 PE=1 SV=1	564.428	38.79	1	4	6	26	1.69194e+10	18.8859
UniProtKB:Q9H6R4	Nucleolar protein 6 OS=Homo sapiens GN=NOL6 PE=1 SV=2	564.239	12.39	1	9	9	17	1.68195e+09	127.513
UniProtKB:Q13404	Ubiquitin-conjugating enzyme E2 variant 1 OS=Homo sapiens GN=UBE2V1 PE=1 SV=2	563.568	74.15	1	6	11	19	5.69739e+09	16.4843
UniProtKB:Q9NYB0	Telomeric repeat-binding factor 2-interacting protein 1 OS=Homo sapiens GN=TERF2IP PE=1 SV=1	563.502	37.84	1	11	11	15	2.1625e+09	44.2328
UniProtKB:Q9HAV7	GrpE protein homolog 1, mitochondrial OS=Homo sapiens GN=GRPEL1 PE=1 SV=2	563.332	42.4	1	9	9	21	4.50973e+09	24.2639
UniProtKB:O75475	PC4 and SFRS1-interacting protein OS=Homo sapiens GN=PSIP1 PE=1 SV=1	562.84	20.94	1	8	8	17	2.80579e+09	60.0667
UniProtKB:P67870	Casein kinase II subunit beta OS=Homo sapiens GN=CSNK2B PE=1 SV=1	562.768	51.16	1	9	9	19	11948506898	24.926
UniProtKB:Q01844	RNA-binding protein EWS OS=Homo sapiens GN=EWSR1 PE=1 SV=1	562.38	10.67	1	5	5	17	1.0834e+10	68.4357
UniProtKB:P36954	DNA-directed RNA polymerase II subunit RPB9 OS=Homo sapiens GN=POLR2I PE=1 SV=1	562.285	64	1	5	5	11	1.23022e+09	14.5136
UniProtKB:Q86V81	THO complex subunit 4 OS=Homo sapiens GN=THOC4 PE=1 SV=3	561.42	34.63	1	7	7	14	4029495546	26.8716
UniProtKB:P46109	Crk-like protein OS=Homo sapiens GN=CRKL PE=1 SV=1	561.378	43.56	1	10	10	16	3593418484	33.7559
UniProtKB:Q96A49	Synapse-associated protein 1 OS=Homo sapiens GN=SYAP1 PE=1 SV=1	560.788	37.22	1	12	12	15	2.42612e+09	39.9089
UniProtKB:Q13616	Cullin-1 OS=Homo sapiens GN=CUL1 PE=1 SV=2	560.115	23.32	1	16	16	21	1.14819e+09	89.622
UniProtKB:Q05682	Caldesmon OS=Homo sapiens GN=CALD1 PE=1 SV=2	559.93	20.55	1	12	12	17	2.60229e+09	93.1945
UniProtKB:P62879	Guanine nucleotide-binding protein G(I)/G(S)/G(T) subunit beta-2 OS=Homo sapiens GN=GNB2 PE=1 SV=3	559.165	32.06	1	2	8	14	4.28382e+09	37.3071
UniProtKB:Q8N9T8	Protein KRI1 homolog OS=Homo sapiens GN=KRI1 PE=1 SV=2	557.785	21.44	1	11	11	16	1.09934e+09	83.2008
UniProtKB:Q9HCE1	Putative helicase MOV-10 OS=Homo sapiens GN=MOV10 PE=1 SV=2	557.112	24.53	1	17	17	21	7.24134e+08	113.599
UniProtKB:O15514	DNA-directed RNA polymerase II subunit RPB4 OS=Homo sapiens GN=POLR2D PE=1 SV=1	556.604	72.54	1	7	7	14	2.04469e+09	16.3011
UniProtKB:Q9UNE7	E3 ubiquitin-protein ligase CHIP OS=Homo sapiens GN=STUB1 PE=1 SV=2	556.141	50.83	1	14	15	20	2.91936e+09	34.8342
UniProtKB:Q9H2J4	Phosducin-like protein 3 OS=Homo sapiens GN=PDCL3 PE=1 SV=1	555.79	49.37	1	9	9	15	2.07411e+09	27.5971
UniProtKB:P16383	GC-rich sequence DNA-binding factor OS=Homo sapiens GN=TCF9 PE=1 SV=2	555.567	14.21	1	7	7	12	5.13956e+08	89.3294
UniProtKB:Q2VIR3	Eukaryotic translation initiation factor 2 subunit 3-like protein OS=Homo sapiens GN=EIF2S3L PE=1 SV=2	555.565	39.41	1	0	15	22	5.37367e+09	51.1962
UniProtKB:Q9P287	BRCA2 and CDKN1A-interacting protein OS=Homo sapiens GN=BCCIP PE=1 SV=1	554.833	38.22	1	8	8	12	1971425004	35.9567
UniProtKB:Q07866	Kinesin light chain 1 OS=Homo sapiens GN=KLC1 PE=1 SV=2	554.414	26.18	1	11	13	22	2.63139e+09	65.2689
UniProtKB:O15160	DNA-directed RNA polymerases I and III subunit RPAC1 OS=Homo sapiens GN=POLR1C PE=1 SV=1	553.38	19.94	1	5	5	11	3.54174e+09	39.225
UniProtKB:O43660	Pleiotropic regulator 1 OS=Homo sapiens GN=PLRG1 PE=1 SV=1	553.041	36.96	1	13	13	19	1.9152e+09	57.1581
UniProtKB:Q13177	Serine/threonine-protein kinase PAK 2 OS=Homo sapiens GN=PAK2 PE=1 SV=3	552.617	28.63	1	8	11	21	2.07481e+09	58.0059
UniProtKB:Q8NFI4	Putative protein FAM10A5 OS=Homo sapiens GN=FAM10A5 PE=5 SV=1	552.237	20.87	1	0	8	24	2.0722e+10	41.3513
UniProtKB:Q96J01	THO complex subunit 3 OS=Homo sapiens GN=THOC3 PE=1 SV=1	552.147	34.19	1	10	10	15	3.68028e+09	38.7468
UniProtKB:P49750	YLP motif-containing protein 1 OS=Homo sapiens GN=YLPM1 PE=1 SV=3	551.663	11.89	1	17	17	20	1.60896e+09	219.849
UniProtKB:Q15293	Reticulocalbin-1 OS=Homo sapiens GN=RCN1 PE=1 SV=1	551.367	44.41	1	11	11	20	4.26995e+09	38.8662
UniProtKB:P55735	Protein SEC13 homolog OS=Homo sapiens GN=SEC13 PE=1 SV=3	550.193	36.96	1	7	7	16	4.85427e+09	35.5181
UniProtKB:P84103	Serine/arginine-rich splicing factor 3 OS=Homo sapiens GN=SRSF3 PE=1 SV=1	548.626	45.73	1	8	9	33	1.84566e+10	19.3179
UniProtKB:P35244	Replication protein A 14 kDa subunit OS=Homo sapiens GN=RPA3 PE=1 SV=1	548.529	89.26	1	8	8	17	6.58732e+09	13.5599
UniProtKB:P08621	U1 small nuclear ribonucleoprotein 70 kDa OS=Homo sapiens GN=SNRNP70 PE=1 SV=2	548.162	40.73	1	14	14	23	5.27001e+09	51.5258
UniProtKB:O60610	Protein diaphanous homolog 1 OS=Homo sapiens GN=DIAPH1 PE=1 SV=2	547.819	13.92	1	15	15	18	9.54144e+08	141.258
UniProtKB:Q96EB6	NAD-dependent deacetylase sirtuin-1 OS=Homo sapiens GN=SIRT1 PE=1 SV=2	545.795	16.87	1	9	9	13	8.27839e+08	81.63
UniProtKB:P82094	TATA element modulatory factor OS=Homo sapiens GN=TMF1 PE=1 SV=2	545.516	12.17	1	11	11	13	6.15468e+08	122.767
UniProtKB:O00507	Probable ubiquitin carboxyl-terminal hydrolase FAF-Y OS=Homo sapiens GN=USP9Y PE=1 SV=2	544.657	8.18	1	0	18	21	1.36345e+09	290.891
UniProtKB:Q9UBC2	Epidermal growth factor receptor substrate 15-like 1 OS=Homo sapiens GN=EPS15L1 PE=1 SV=1	543.495	25.69	1	15	15	18	1.66739e+09	94.197
UniProtKB:Q15046	Lysyl-tRNA synthetase OS=Homo sapiens GN=KARS PE=1 SV=3	542.504	34.34	1	16	17	23	3.69735e+09	68.0046
UniProtKB:Q9NZL4	Hsp70-binding protein 1 OS=Homo sapiens GN=HSPBP1 PE=1 SV=1	541.69	50.83	1	14	14	17	1.66613e+09	39.4485
UniProtKB:P62917	60S ribosomal protein L8 OS=Homo sapiens GN=RPL8 PE=1 SV=2	541.168	38.52	1	9	9	18	3.04999e+10	28.0073
UniProtKB:P00390	Glutathione reductase, mitochondrial OS=Homo sapiens GN=GSR PE=1 SV=2	540.806	25.48	1	11	11	16	1.75939e+09	56.221
UniProtKB:Q9Y4E8	Ubiquitin carboxyl-terminal hydrolase 15 OS=Homo sapiens GN=USP15 PE=1 SV=3	540.776	21	1	15	15	18	1.16797e+09	112.348
UniProtKB:Q08043	Alpha-actinin-3 OS=Homo sapiens GN=ACTN3 PE=1 SV=2	540.518	7.1	1	0	6	14	2.86705e+09	103.176
UniProtKB:P62826	GTP-binding nuclear protein Ran OS=Homo sapiens GN=RAN PE=1 SV=3	540.475	49.54	1	11	11	20	32028588488	24.4076
UniProtKB:Q68EM7	Rho GTPase-activating protein 17 OS=Homo sapiens GN=ARHGAP17 PE=1 SV=1	540.421	14.98	1	7	7	12	1194194681	95.3773
UniProtKB:Q13098	COP9 signalosome complex subunit 1 OS=Homo sapiens GN=GPS1 PE=1 SV=4	539.87	40.53	1	17	17	22	2.59712e+09	55.5012
UniProtKB:O00193	Small acidic protein OS=Homo sapiens GN=SMAP PE=1 SV=1	539.235	22.4	1	3	3	8	1.85265e+09	20.3202
UniProtKB:P09417	Dihydropteridine reductase OS=Homo sapiens GN=QDPR PE=1 SV=2	538.351	34.43	1	6	6	11	1690277188	25.773
UniProtKB:P11216	Glycogen phosphorylase, brain form OS=Homo sapiens GN=PYGB PE=1 SV=5	538.116	22.42	1	12	15	21	3.5369e+09	96.6345
UniProtKB:Q9UI12	V-type proton ATPase subunit H OS=Homo sapiens GN=ATP6V1H PE=1 SV=1	537.976	27.74	1	10	10	14	1.15186e+09	55.8471
UniProtKB:Q96T88	E3 ubiquitin-protein ligase UHRF1 OS=Homo sapiens GN=UHRF1 PE=1 SV=1	537.508	23.08	1	12	12	14	1635986725	89.757
UniProtKB:Q9BV86	Alpha N-terminal protein methyltransferase 1A OS=Homo sapiens GN=METTL11A PE=1 SV=3	537.127	36.32	1	6	6	10	1.96287e+09	25.3708
UniProtKB:Q9NZ32	Actin-related protein 10 OS=Homo sapiens GN=ACTR10 PE=1 SV=1	536.809	33.81	1	11	11	16	7.82587e+08	46.2773
UniProtKB:Q9UHY7	Enolase-phosphatase E1 OS=Homo sapiens GN=ENOPH1 PE=1 SV=1	536.457	29.12	1	6	6	12	1.9984e+09	28.9145
UniProtKB:Q9BR76	Coronin-1B OS=Homo sapiens GN=CORO1B PE=1 SV=1	535.832	28.22	1	7	8	13	4486833216	54.2003
UniProtKB:O75874	Isocitrate dehydrogenase [NADP] cytoplasmic OS=Homo sapiens GN=IDH1 PE=1 SV=2	535.003	26.33	1	8	9	15	2393791297	46.6295
UniProtKB:Q5TFE4	5'-nucleotidase domain-containing protein 1 OS=Homo sapiens GN=NT5DC1 PE=1 SV=1	534.992	33.41	1	11	11	13	1779782996	51.8119
UniProtKB:P30048	Thioredoxin-dependent peroxide reductase, mitochondrial OS=Homo sapiens GN=PRDX3 PE=1 SV=3	534.45	42.97	1	8	8	18	13695191320	27.6752
UniProtKB:P12532	Creatine kinase U-type, mitochondrial OS=Homo sapiens GN=CKMT1A PE=1 SV=1	533.839	32.61	1	10	12	17	3.49848e+09	47.0072
UniProtKB:Q9BSC4	Nucleolar protein 10 OS=Homo sapiens GN=NOL10 PE=1 SV=1	533.586	11.48	1	5	5	9	2.61062e+08	80.2514
UniProtKB:Q14160	Protein scribble homolog OS=Homo sapiens GN=SCRIB PE=1 SV=4	531.79	15.03	1	14	14	18	2.25975e+09	174.778
UniProtKB:Q9UKN8	General transcription factor 3C polypeptide 4 OS=Homo sapiens GN=GTF3C4 PE=1 SV=2	531.463	19.83	1	10	10	12	7.05914e+08	91.9235
UniProtKB:P29144	Tripeptidyl-peptidase 2 OS=Homo sapiens GN=TPP2 PE=1 SV=4	530.85	14.81	1	15	15	18	1419518724	138.263
UniProtKB:P61158	Actin-related protein 3 OS=Homo sapiens GN=ACTR3 PE=1 SV=3	530.753	53.35	1	13	15	19	6.0782e+09	47.341
UniProtKB:P33992	DNA replication licensing factor MCM5 OS=Homo sapiens GN=MCM5 PE=1 SV=5	530.73	43.05	1	26	26	32	4.31928e+09	82.2332
UniProtKB:Q14839	Chromodomain-helicase-DNA-binding protein 4 OS=Homo sapiens GN=CHD4 PE=1 SV=2	530.103	15.59	1	17	23	27	8.07482e+08	217.867
UniProtKB:Q13642	Four and a half LIM domains protein 1 OS=Homo sapiens GN=FHL1 PE=1 SV=4	529.915	43.96	1	11	11	16	8.22161e+09	36.2386
UniProtKB:P50995	Annexin A11 OS=Homo sapiens GN=ANXA11 PE=1 SV=1	529.671	25.94	1	10	11	15	2.28694e+09	54.3551
UniProtKB:P04632	Calpain small subunit 1 OS=Homo sapiens GN=CAPNS1 PE=1 SV=1	529.326	49.63	1	6	8	12	2537124065	28.2977
UniProtKB:Q9H9Y6	DNA-directed RNA polymerase I subunit RPA2 OS=Homo sapiens GN=POLR1B PE=1 SV=2	528.831	19.74	1	16	16	18	1365987550	128.146
UniProtKB:P62993	Growth factor receptor-bound protein 2 OS=Homo sapiens GN=GRB2 PE=1 SV=1	528.493	54.38	1	11	11	19	4.46464e+09	25.1904
UniProtKB:P54886	Delta-1-pyrroline-5-carboxylate synthase OS=Homo sapiens GN=ALDH18A1 PE=1 SV=2	528.407	26.67	1	20	20	23	1811237594	87.2475
UniProtKB:P04637	Cellular tumor antigen p53 OS=Homo sapiens GN=TP53 PE=1 SV=4	527.402	34.61	1	9	9	16	2151178636	43.6254
UniProtKB:O00203	AP-3 complex subunit beta-1 OS=Homo sapiens GN=AP3B1 PE=1 SV=3	527.29	19.38	1	13	15	19	1.24093e+09	121.245
UniProtKB:O95721	Synaptosomal-associated protein 29 OS=Homo sapiens GN=SNAP29 PE=1 SV=1	526.927	37.6	1	8	8	14	2.54309e+09	28.9526
UniProtKB:Q9P289	Serine/threonine-protein kinase MST4 OS=Homo sapiens GN=MST4 PE=1 SV=2	526.468	45.67	1	9	15	19	1.99293e+09	46.4996
UniProtKB:P40939	Trifunctional enzyme subunit alpha, mitochondrial OS=Homo sapiens GN=HADHA PE=1 SV=2	526.343	25.82	1	13	13	16	2.39101e+09	82.9469
UniProtKB:Q9NZB2	Constitutive coactivator of PPAR-gamma-like protein 1 OS=Homo sapiens GN=FAM120A PE=1 SV=2	525.506	16.46	1	11	12	14	1605483158	121.811
UniProtKB:Q9Y2W2	WW domain-binding protein 11 OS=Homo sapiens GN=WBP11 PE=1 SV=1	525.08	27.61	1	15	15	22	2.53447e+09	69.9539
UniProtKB:Q9BY77	Polymerase delta-interacting protein 3 OS=Homo sapiens GN=POLDIP3 PE=1 SV=2	524.964	35.63	1	11	11	14	2037379160	46.0605
UniProtKB:Q5T1M5	FK506-binding protein 15 OS=Homo sapiens GN=FKBP15 PE=1 SV=2	524.793	13.45	1	11	11	14	730915948	133.547
UniProtKB:Q9UBQ7	Glyoxylate reductase/hydroxypyruvate reductase OS=Homo sapiens GN=GRHPR PE=1 SV=1	524.657	44.82	1	10	10	16	2.57829e+09	35.6457
UniProtKB:P52306	Rap1 GTPase-GDP dissociation stimulator 1 OS=Homo sapiens GN=RAP1GDS1 PE=1 SV=3	524.369	35.75	1	14	14	16	1.57349e+09	66.2745
UniProtKB:Q8WUA2	Peptidyl-prolyl cis-trans isomerase-like 4 OS=Homo sapiens GN=PPIL4 PE=1 SV=1	523.694	33.13	1	13	13	18	1.90821e+09	57.1895
UniProtKB:Q96A65	Exocyst complex component 4 OS=Homo sapiens GN=EXOC4 PE=1 SV=1	523.663	16.94	1	12	12	15	1.54667e+09	110.429
UniProtKB:P46821	Microtubule-associated protein 1B OS=Homo sapiens GN=MAP1B PE=1 SV=1	523.034	7.98	1	13	14	18	391855470	270.454
UniProtKB:Q9Y4A5	Transformation/transcription domain-associated protein OS=Homo sapiens GN=TRRAP PE=1 SV=3	522.669	5.39	1	15	15	15	5.88356e+08	437.318
UniProtKB:Q7Z417	Nuclear fragile X mental retardation-interacting protein 2 OS=Homo sapiens GN=NUFIP2 PE=1 SV=1	522.57	23.45	1	9	9	11	7.78285e+08	76.0747
UniProtKB:O75400	Pre-mRNA-processing factor 40 homolog A OS=Homo sapiens GN=PRPF40A PE=1 SV=2	522.058	13.9	1	12	12	19	2.46735e+09	108.737
UniProtKB:O75165	DnaJ homolog subfamily C member 13 OS=Homo sapiens GN=DNAJC13 PE=1 SV=5	521.487	6.95	1	11	11	14	522537812	254.252
UniProtKB:Q9BV20	Methylthioribose-1-phosphate isomerase OS=Homo sapiens GN=MRI1 PE=1 SV=1	520.899	42.01	1	10	10	16	4.45236e+09	39.1254
UniProtKB:Q8NCM8	Cytoplasmic dynein 2 heavy chain 1 OS=Homo sapiens GN=DYNC2H1 PE=1 SV=4	520.505	5.08	1	15	15	19	6.77839e+08	492.311
UniProtKB:P50579	Methionine aminopeptidase 2 OS=Homo sapiens GN=METAP2 PE=1 SV=1	520.44	32.43	1	10	10	14	2.07931e+09	52.8581
UniProtKB:A6NHL2	Tubulin alpha chain-like 3 OS=Homo sapiens GN=TUBAL3 PE=1 SV=2	520.164	6.73	1	0	5	27	3.82814e+10	49.8767
UniProtKB:Q9C0C2	182 kDa tankyrase-1-binding protein OS=Homo sapiens GN=TNKS1BP1 PE=1 SV=3	519.392	7.35	1	7	7	9	5.44619e+08	181.671
UniProtKB:Q9NUQ9	Protein FAM49B OS=Homo sapiens GN=FAM49B PE=1 SV=1	519.314	41.36	1	6	8	13	3.68705e+09	36.7246
UniProtKB:O00487	26S proteasome non-ATPase regulatory subunit 14 OS=Homo sapiens GN=PSMD14 PE=1 SV=1	519.047	36.13	1	10	10	15	4325045755	34.5546
UniProtKB:Q9GZL7	Ribosome biogenesis protein WDR12 OS=Homo sapiens GN=WDR12 PE=1 SV=2	519.018	40.66	1	12	12	15	3105961762	47.6777
UniProtKB:P08237	6-phosphofructokinase, muscle type OS=Homo sapiens GN=PFKM PE=1 SV=2	518.99	29.74	1	15	16	19	1.82373e+09	85.1284
UniProtKB:Q96IZ0	PRKC apoptosis WT1 regulator protein OS=Homo sapiens GN=PAWR PE=1 SV=1	518.826	36.18	1	7	7	12	1.48193e+09	36.5454
UniProtKB:O95782	AP-2 complex subunit alpha-1 OS=Homo sapiens GN=AP2A1 PE=1 SV=3	518.773	20.78	1	7	15	17	2.91389e+09	107.478
UniProtKB:Q96SI9	Spermatid perinuclear RNA-binding protein OS=Homo sapiens GN=STRBP PE=1 SV=1	518.356	23.51	1	10	13	20	6913180353	73.6059
UniProtKB:P98175	RNA-binding protein 10 OS=Homo sapiens GN=RBM10 PE=1 SV=3	516.349	20.54	1	12	14	20	2255007056	103.469
UniProtKB:Q8NBF2	NHL repeat-containing protein 2 OS=Homo sapiens GN=NHLRC2 PE=1 SV=1	516.279	24.1	1	10	10	13	1136938022	79.3935
UniProtKB:Q09666	Neuroblast differentiation-associated protein AHNAK OS=Homo sapiens GN=AHNAK PE=1 SV=2	515.629	8.34	1	14	14	17	6.25906e+08	628.699
UniProtKB:P47813	Eukaryotic translation initiation factor 1A, X-chromosomal OS=Homo sapiens GN=EIF1AX PE=1 SV=2	515.285	43.06	1	1	6	16	8933442234	16.4502
UniProtKB:Q15437	Protein transport protein Sec23B OS=Homo sapiens GN=SEC23B PE=1 SV=2	514.721	23.6	1	11	12	15	2.47033e+09	86.4235
UniProtKB:Q96RS6	NudC domain-containing protein 1 OS=Homo sapiens GN=NUDCD1 PE=1 SV=2	514.054	23.5	1	10	10	15	9.61074e+08	66.7133
UniProtKB:P55263	Adenosine kinase OS=Homo sapiens GN=ADK PE=1 SV=2	513.897	59.39	1	16	16	19	2552174212	40.5197
UniProtKB:Q13573	SNW domain-containing protein 1 OS=Homo sapiens GN=SNW1 PE=1 SV=1	512.361	27.24	1	12	12	18	1.22695e+09	61.4565
UniProtKB:O95983	Methyl-CpG-binding domain protein 3 OS=Homo sapiens GN=MBD3 PE=1 SV=1	511.793	33.33	1	9	9	15	1.36081e+09	32.8233
UniProtKB:Q13451	Peptidyl-prolyl cis-trans isomerase FKBP5 OS=Homo sapiens GN=FKBP5 PE=1 SV=2	510.842	26.91	1	9	9	14	3.43943e+09	51.1796
UniProtKB:Q96TA1	Niban-like protein 1 OS=Homo sapiens GN=FAM129B PE=1 SV=2	510.76	19.1	1	8	8	10	1107574216	82.6309
UniProtKB:Q9Y570	Protein phosphatase methylesterase 1 OS=Homo sapiens GN=PPME1 PE=1 SV=3	509.464	30.05	1	10	10	16	4.39109e+09	42.2882
UniProtKB:O75506	Heat shock factor-binding protein 1 OS=Homo sapiens GN=HSBP1 PE=1 SV=1	508.986	72.37	1	4	4	11	1.73304e+09	8.53818
UniProtKB:Q52LJ0	Protein FAM98B OS=Homo sapiens GN=FAM98B PE=1 SV=1	507.927	34.85	1	8	8	14	1.00616e+10	37.167
UniProtKB:P61086	Ubiquitin-conjugating enzyme E2 K OS=Homo sapiens GN=UBE2K PE=1 SV=3	507.451	52	1	9	9	15	4.84014e+09	22.3926
UniProtKB:Q86XP3	ATP-dependent RNA helicase DDX42 OS=Homo sapiens GN=DDX42 PE=1 SV=1	507.117	23.35	1	15	15	18	1.67678e+09	102.912
UniProtKB:Q9NQG5	Regulation of nuclear pre-mRNA domain-containing protein 1B OS=Homo sapiens GN=RPRD1B PE=1 SV=1	506.7	39.57	1	9	10	16	1099225988	36.8772
UniProtKB:P67936	Tropomyosin alpha-4 chain OS=Homo sapiens GN=TPM4 PE=1 SV=3	506.499	57.26	1	6	16	27	1.53481e+10	28.5045
UniProtKB:Q96C90	Protein phosphatase 1 regulatory subunit 14B OS=Homo sapiens GN=PPP1R14B PE=1 SV=3	506.261	57.82	1	4	4	17	5.67076e+09	15.901
UniProtKB:Q13439	Golgin subfamily A member 4 OS=Homo sapiens GN=GOLGA4 PE=1 SV=1	505.951	8.16	1	14	15	16	7.66608e+08	260.98
UniProtKB:Q9UM54	Myosin-VI OS=Homo sapiens GN=MYO6 PE=1 SV=4	505.65	16.31	1	16	16	18	5.63354e+08	149.596
UniProtKB:Q15056	Eukaryotic translation initiation factor 4H OS=Homo sapiens GN=EIF4H PE=1 SV=5	505.451	39.11	1	8	8	23	18079092552	27.3684
UniProtKB:Q16630	Cleavage and polyadenylation specificity factor subunit 6 OS=Homo sapiens GN=CPSF6 PE=1 SV=2	505.404	19.06	1	10	10	20	4748951104	59.1734
UniProtKB:Q9NSD9	Phenylalanyl-tRNA synthetase beta chain OS=Homo sapiens GN=FARSB PE=1 SV=3	505.188	40.92	1	23	24	34	3.77552e+09	66.0735
UniProtKB:Q9BQ04	RNA-binding protein 4B OS=Homo sapiens GN=RBM4B PE=1 SV=1	504.7	37.6	1	1	13	21	4.77233e+09	40.1244
UniProtKB:Q9UHI6	Probable ATP-dependent RNA helicase DDX20 OS=Homo sapiens GN=DDX20 PE=1 SV=2	504.229	28.88	1	16	16	21	2.66393e+09	92.1825
UniProtKB:Q9Y5Q9	General transcription factor 3C polypeptide 3 OS=Homo sapiens GN=GTF3C3 PE=1 SV=1	503.596	15.91	1	10	10	11	5.84516e+08	101.208
UniProtKB:P42765	3-ketoacyl-CoA thiolase, mitochondrial OS=Homo sapiens GN=ACAA2 PE=1 SV=2	503.039	34.26	1	8	8	11	7.5818e+08	41.8976
UniProtKB:P49840	Glycogen synthase kinase-3 alpha OS=Homo sapiens GN=GSK3A PE=1 SV=2	503.003	25.67	1	6	8	10	6.81207e+08	50.949
UniProtKB:Q06203	Amidophosphoribosyltransferase OS=Homo sapiens GN=PPAT PE=1 SV=1	502.881	31.14	1	14	14	18	3.02886e+09	57.3624
UniProtKB:Q13564	NEDD8-activating enzyme E1 regulatory subunit OS=Homo sapiens GN=NAE1 PE=1 SV=1	502.736	39.51	1	13	13	17	1.72325e+09	60.2086
UniProtKB:Q9P2R3	Ankyrin repeat and FYVE domain-containing protein 1 OS=Homo sapiens GN=ANKFY1 PE=1 SV=2	501.783	17.88	1	15	15	17	846347607	128.318
UniProtKB:Q99961	Endophilin-A2 OS=Homo sapiens GN=SH3GL1 PE=1 SV=1	501.563	44.02	1	9	15	24	2162534404	41.464
UniProtKB:P43490	Nicotinamide phosphoribosyltransferase OS=Homo sapiens GN=NAMPT PE=1 SV=1	500.576	43.58	1	15	15	16	3168984346	55.4866
UniProtKB:O00170	AH receptor-interacting protein OS=Homo sapiens GN=AIP PE=1 SV=2	500.329	47.88	1	12	12	19	3.80088e+09	37.6121
UniProtKB:Q9NX24	H/ACA ribonucleoprotein complex subunit 2 OS=Homo sapiens GN=NHP2 PE=1 SV=1	499.533	47.71	1	5	5	10	3.3745e+09	17.1899
UniProtKB:P31930	Cytochrome b-c1 complex subunit 1, mitochondrial OS=Homo sapiens GN=UQCRC1 PE=1 SV=3	498.586	21.25	1	7	8	13	1804235816	52.6124
UniProtKB:P42566	Epidermal growth factor receptor substrate 15 OS=Homo sapiens GN=EPS15 PE=1 SV=2	497.404	15.18	1	10	10	11	4.32958e+08	98.5948
UniProtKB:P15374	Ubiquitin carboxyl-terminal hydrolase isozyme L3 OS=Homo sapiens GN=UCHL3 PE=1 SV=1	497.387	37.83	1	8	8	14	4.97704e+09	26.166
UniProtKB:O60231	Putative pre-mRNA-splicing factor ATP-dependent RNA helicase DHX16 OS=Homo sapiens GN=DHX16 PE=1 SV=2	497.04	12.01	1	8	9	12	1.30534e+09	119.189
UniProtKB:Q9H223	EH domain-containing protein 4 OS=Homo sapiens GN=EHD4 PE=1 SV=1	496.66	19.04	1	7	8	10	7.99448e+08	61.1365
UniProtKB:Q92879	CUGBP Elav-like family member 1 OS=Homo sapiens GN=CELF1 PE=1 SV=2	496.012	23.87	1	8	9	14	1.88335e+09	52.0299
UniProtKB:P12235	ADP/ATP translocase 1 OS=Homo sapiens GN=SLC25A4 PE=1 SV=4	495.896	31.54	1	0	10	21	6390155109	33.0432
UniProtKB:P05091	Aldehyde dehydrogenase, mitochondrial OS=Homo sapiens GN=ALDH2 PE=1 SV=2	495.679	36.94	1	12	14	15	1.59104e+09	56.3456
UniProtKB:Q8WXA9	Splicing factor, arginine/serine-rich 12 OS=Homo sapiens GN=SFRS12 PE=1 SV=1	495.66	15.94	1	5	5	11	1.26798e+09	59.345
UniProtKB:P09525	Annexin A4 OS=Homo sapiens GN=ANXA4 PE=1 SV=4	495.38	35.42	1	9	11	16	1.0774e+09	35.8601
UniProtKB:Q96EE3	Nucleoporin SEH1 OS=Homo sapiens GN=SEH1L PE=1 SV=3	495.328	30.28	1	8	8	12	1329807748	39.6234
UniProtKB:Q15007	Pre-mRNA-splicing regulator WTAP OS=Homo sapiens GN=WTAP PE=1 SV=2	494.71	31.57	1	11	11	15	9.74881e+08	44.2167
UniProtKB:O75390	Citrate synthase, mitochondrial OS=Homo sapiens GN=CS PE=1 SV=2	493.844	43.35	1	18	18	25	6.36507e+09	51.6795
UniProtKB:Q86UP2	Kinectin OS=Homo sapiens GN=KTN1 PE=1 SV=1	493.762	11.5	1	12	12	15	1.05281e+09	156.179
UniProtKB:Q96G03	Phosphoglucomutase-2 OS=Homo sapiens GN=PGM2 PE=1 SV=4	493.747	28.1	1	14	14	17	3159627208	68.2404
UniProtKB:Q9UHB6	LIM domain and actin-binding protein 1 OS=Homo sapiens GN=LIMA1 PE=1 SV=1	493.63	14.23	1	9	9	16	1.12727e+09	85.1734
UniProtKB:P28070	Proteasome subunit beta type-4 OS=Homo sapiens GN=PSMB4 PE=1 SV=4	493.432	39.39	1	7	7	13	3356532653	29.1855
UniProtKB:Q9NTZ6	RNA-binding protein 12 OS=Homo sapiens GN=RBM12 PE=1 SV=1	493.2	17.27	1	14	14	22	3.63381e+09	97.3334
UniProtKB:Q9H0S4	Probable ATP-dependent RNA helicase DDX47 OS=Homo sapiens GN=DDX47 PE=1 SV=1	492.501	30.77	1	11	11	16	2.10658e+09	50.6147
UniProtKB:P62820	Ras-related protein Rab-1A OS=Homo sapiens GN=RAB1A PE=1 SV=3	492.344	53.17	1	3	10	17	1.0252e+10	22.6634
UniProtKB:Q9UNN5	FAS-associated factor 1 OS=Homo sapiens GN=FAF1 PE=1 SV=2	492.217	15.38	1	9	9	13	2.01684e+09	73.9076
UniProtKB:Q9H0B6	Kinesin light chain 2 OS=Homo sapiens GN=KLC2 PE=1 SV=1	490.326	24.92	1	8	11	17	1.74911e+09	68.8923
UniProtKB:Q13617	Cullin-2 OS=Homo sapiens GN=CUL2 PE=1 SV=2	489.826	26.31	1	13	13	16	8.00097e+08	86.9268
UniProtKB:P05114	Non-histone chromosomal protein HMG-14 OS=Homo sapiens GN=HMGN1 PE=1 SV=3	489.04	34	1	4	4	10	3.38889e+09	10.6526
UniProtKB:Q9Y3Z3	SAM domain and HD domain-containing protein 1 OS=Homo sapiens GN=SAMHD1 PE=1 SV=2	488.89	28.43	1	13	13	16	1.59265e+09	72.1548
UniProtKB:P62633	Cellular nucleic acid-binding protein OS=Homo sapiens GN=CNBP PE=1 SV=1	488.854	47.46	1	7	7	13	6.42225e+09	19.4496
UniProtKB:Q7Z460	CLIP-associating protein 1 OS=Homo sapiens GN=CLASP1 PE=1 SV=1	488.26	13.65	1	11	13	15	1492105724	169.346
UniProtKB:P62280	40S ribosomal protein S11 OS=Homo sapiens GN=RPS11 PE=1 SV=3	488.1	50.63	1	10	10	29	2.13297e+10	18.419
UniProtKB:Q9UBB6	Neurochondrin OS=Homo sapiens GN=NCDN PE=1 SV=1	487.807	24.97	1	13	13	14	2.66479e+09	78.8136
UniProtKB:P40938	Replication factor C subunit 3 OS=Homo sapiens GN=RFC3 PE=1 SV=2	486.439	31.74	1	10	10	14	1.64231e+09	40.5299
UniProtKB:Q15102	Platelet-activating factor acetylhydrolase IB subunit gamma OS=Homo sapiens GN=PAFAH1B3 PE=1 SV=1	485.153	58.87	1	8	8	17	2.80219e+09	25.7182
UniProtKB:P48147	Prolyl endopeptidase OS=Homo sapiens GN=PREP PE=1 SV=2	484.07	24.79	1	13	13	15	2.65234e+09	80.648
UniProtKB:Q16629	Serine/arginine-rich splicing factor 7 OS=Homo sapiens GN=SRSF7 PE=1 SV=1	483.757	31.09	1	9	10	22	14595819383	27.35
UniProtKB:P37108	Signal recognition particle 14 kDa protein OS=Homo sapiens GN=SRP14 PE=1 SV=2	483.578	33.82	1	5	5	9	9.18725e+09	14.5608
UniProtKB:Q13085	Acetyl-CoA carboxylase 1 OS=Homo sapiens GN=ACACA PE=1 SV=2	482.789	11.59	1	16	19	20	1265802859	265.385
UniProtKB:Q96HE7	ERO1-like protein alpha OS=Homo sapiens GN=ERO1L PE=1 SV=2	482.246	27.56	1	8	9	16	2.28417e+09	54.3581
UniProtKB:Q86WB0	Nuclear-interacting partner of ALK OS=Homo sapiens GN=ZC3HC1 PE=1 SV=1	482.153	23.11	1	8	8	12	6.03203e+08	55.2261
UniProtKB:Q9H074	Polyadenylate-binding protein-interacting protein 1 OS=Homo sapiens GN=PAIP1 PE=1 SV=1	482.004	22.13	1	7	7	12	1621657763	53.4911
UniProtKB:Q9UN86	Ras GTPase-activating protein-binding protein 2 OS=Homo sapiens GN=G3BP2 PE=1 SV=2	481.556	30.71	1	11	11	19	5.91521e+09	54.0878
UniProtKB:P17812	CTP synthase 1 OS=Homo sapiens GN=CTPS PE=1 SV=2	481.14	37.9	1	15	16	22	7.96204e+09	66.648
UniProtKB:Q4J6C6	Prolyl endopeptidase-like OS=Homo sapiens GN=PREPL PE=1 SV=1	481.039	20.91	1	9	9	14	1.32038e+09	83.8734
UniProtKB:O75367	Core histone macro-H2A.1 OS=Homo sapiens GN=H2AFY PE=1 SV=4	480.126	31.45	1	8	10	15	2.24406e+09	39.5925
UniProtKB:Q13151	Heterogeneous nuclear ribonucleoprotein A0 OS=Homo sapiens GN=HNRNPA0 PE=1 SV=1	480.012	32.46	1	7	7	15	7905222806	30.8218
UniProtKB:P61923	Coatomer subunit zeta-1 OS=Homo sapiens GN=COPZ1 PE=1 SV=1	478.574	36.16	1	5	5	11	3.71282e+09	20.1855
UniProtKB:P19525	Interferon-induced, double-stranded RNA-activated protein kinase OS=Homo sapiens GN=EIF2AK2 PE=1 SV=2	478.458	25.77	1	10	10	13	1.00436e+09	62.0556
UniProtKB:Q9NQ48	Leucine zipper transcription factor-like protein 1 OS=Homo sapiens GN=LZTFL1 PE=1 SV=1	478.415	35.12	1	9	9	14	1.29914e+09	34.5711
UniProtKB:Q15020	Squamous cell carcinoma antigen recognized by T-cells 3 OS=Homo sapiens GN=SART3 PE=1 SV=1	477.748	19.31	1	13	14	19	2190510015	109.865
UniProtKB:Q14011	Cold-inducible RNA-binding protein OS=Homo sapiens GN=CIRBP PE=1 SV=1	477.679	33.14	1	4	4	11	5.59906e+09	18.6367
UniProtKB:Q9Y3U8	60S ribosomal protein L36 OS=Homo sapiens GN=RPL36 PE=1 SV=3	477.205	34.29	1	7	7	21	1.45578e+10	12.2459
UniProtKB:Q9NQR4	Omega-amidase NIT2 OS=Homo sapiens GN=NIT2 PE=1 SV=1	477.187	45.29	1	7	7	11	1.01877e+09	30.5886
UniProtKB:Q96EA4	Protein Spindly OS=Homo sapiens GN=CCDC99 PE=1 SV=2	477.02	20.17	1	8	8	11	6.03159e+08	70.1278
UniProtKB:Q8IZP2	Putative protein FAM10A4 OS=Homo sapiens GN=FAM10A4 PE=5 SV=1	476.856	25.42	1	0	5	17	2.15333e+10	27.3897
UniProtKB:Q9NS69	Mitochondrial import receptor subunit TOM22 homolog OS=Homo sapiens GN=TOMM22 PE=1 SV=3	476.575	66.2	1	5	5	8	2.82821e+09	15.5118
UniProtKB:P61353	60S ribosomal protein L27 OS=Homo sapiens GN=RPL27 PE=1 SV=2	476.502	27.21	1	4	4	41	2.98917e+10	15.7877
UniProtKB:P10515	Dihydrolipoyllysine-residue acetyltransferase component of pyruvate dehydrogenase complex, mitochondrial OS=Homo sapiens GN=DLAT PE=1 SV=3	476.175	28.59	1	11	11	13	2.28209e+09	68.9531
UniProtKB:Q8IYD1	Eukaryotic peptide chain release factor GTP-binding subunit ERF3B OS=Homo sapiens GN=GSPT2 PE=1 SV=2	475.723	15.61	1	0	9	16	5.91473e+09	68.8396
UniProtKB:Q01081	Splicing factor U2AF 35 kDa subunit OS=Homo sapiens GN=U2AF1 PE=1 SV=3	475.7	35.83	1	4	6	12	6.71807e+09	27.8545
UniProtKB:P62269	40S ribosomal protein S18 OS=Homo sapiens GN=RPS18 PE=1 SV=3	475.111	53.95	1	11	11	25	25310299224	17.7079
UniProtKB:Q9UBQ5	Eukaryotic translation initiation factor 3 subunit K OS=Homo sapiens GN=EIF3K PE=1 SV=1	474.912	45.41	1	8	8	17	3.47846e+09	25.0434
UniProtKB:Q9H8H0	Nucleolar protein 11 OS=Homo sapiens GN=NOL11 PE=1 SV=1	474.466	23.92	1	12	12	15	1.66936e+09	81.0719
UniProtKB:P17480	Nucleolar transcription factor 1 OS=Homo sapiens GN=UBTF PE=1 SV=1	474.243	28.27	1	18	18	23	1808084196	89.3502
UniProtKB:P09132	Signal recognition particle 19 kDa protein OS=Homo sapiens GN=SRP19 PE=1 SV=3	473.77	41.67	1	4	4	8	1.135e+09	16.1454
UniProtKB:Q6UXN9	WD repeat-containing protein 82 OS=Homo sapiens GN=WDR82 PE=1 SV=1	471.826	31.31	1	7	7	11	1.55105e+09	35.0565
UniProtKB:P51116	Fragile X mental retardation syndrome-related protein 2 OS=Homo sapiens GN=FXR2 PE=1 SV=2	471.742	24.22	1	9	12	15	2454068008	74.178
UniProtKB:Q15643	Thyroid receptor-interacting protein 11 OS=Homo sapiens GN=TRIP11 PE=1 SV=3	471.5	7.12	1	10	10	11	3.61869e+09	227.447
UniProtKB:O15027	Protein transport protein Sec16A OS=Homo sapiens GN=SEC16A PE=1 SV=3	471.477	11.79	1	14	14	15	8.90732e+08	233.373
UniProtKB:Q04323	UBX domain-containing protein 1 OS=Homo sapiens GN=UBXN1 PE=1 SV=2	471.433	50.17	1	10	10	14	2.9959e+09	33.3049
UniProtKB:Q71RC2	La-related protein 4 OS=Homo sapiens GN=LARP4 PE=1 SV=3	471.075	22.24	1	12	12	16	1.58281e+09	80.5458
UniProtKB:Q99471	Prefoldin subunit 5 OS=Homo sapiens GN=PFDN5 PE=1 SV=2	470.611	42.21	1	6	6	11	3508744650	17.317
UniProtKB:Q14669	Probable E3 ubiquitin-protein ligase TRIP12 OS=Homo sapiens GN=TRIP12 PE=1 SV=1	469.811	7.48	1	10	10	13	6.10826e+08	220.296
UniProtKB:Q8WXI9	Transcriptional repressor p66-beta OS=Homo sapiens GN=GATAD2B PE=1 SV=1	469.653	24.28	1	9	10	14	2.73713e+09	65.22
UniProtKB:Q13868	Exosome complex exonuclease RRP4 OS=Homo sapiens GN=EXOSC2 PE=1 SV=2	469.56	33.11	1	6	6	10	1.53583e+09	32.7681
UniProtKB:Q9Y5K5	Ubiquitin carboxyl-terminal hydrolase isozyme L5 OS=Homo sapiens GN=UCHL5 PE=1 SV=3	469.445	49.85	1	13	13	19	1.83427e+09	37.583
UniProtKB:Q96KP4	Cytosolic non-specific dipeptidase OS=Homo sapiens GN=CNDP2 PE=1 SV=2	468.045	27.79	1	10	10	14	1.32384e+09	52.8449
UniProtKB:P35659	Protein DEK OS=Homo sapiens GN=DEK PE=1 SV=1	467.749	35.2	1	15	15	23	2.64794e+09	42.6479
UniProtKB:CON_P13645	Tax_Id=9606 Gene_Symbol=KRT10 Keratin, type I cytoskeletal 10	467.673	24.62	1	0	12	17	2.21891e+09	59.4749
UniProtKB:P13645	Keratin, type I cytoskeletal 10 OS=Homo sapiens GN=KRT10 PE=1 SV=6	467.673	25	1	0	12	17	2.21891e+09	58.7917
UniProtKB:P52655	Transcription initiation factor IIA subunit 1 OS=Homo sapiens GN=GTF2A1 PE=1 SV=1	467.592	21.81	1	4	4	9	1.26989e+09	41.4885
UniProtKB:O75347	Tubulin-specific chaperone A OS=Homo sapiens GN=TBCA PE=1 SV=3	467.397	55.56	1	12	12	24	22359214816	12.8467
UniProtKB:P46100	Transcriptional regulator ATRX OS=Homo sapiens GN=ATRX PE=1 SV=5	467.245	5.9	1	11	11	12	294344016	282.411
UniProtKB:O14602	Eukaryotic translation initiation factor 1A, Y-chromosomal OS=Homo sapiens GN=EIF1AY PE=1 SV=4	466.616	36.11	1	0	5	14	8933442234	16.4323
UniProtKB:Q9NQC3	Reticulon-4 OS=Homo sapiens GN=RTN4 PE=1 SV=2	465.438	6.46	1	4	4	9	2.69123e+09	129.851
UniProtKB:P55210	Caspase-7 OS=Homo sapiens GN=CASP7 PE=1 SV=1	465.305	19.14	1	4	4	7	3.55431e+08	34.2548
UniProtKB:Q5T8P6	RNA-binding protein 26 OS=Homo sapiens GN=RBM26 PE=1 SV=3	465.283	8.44	1	6	7	10	8.85687e+08	113.527
UniProtKB:P42025	Beta-centractin OS=Homo sapiens GN=ACTR1B PE=1 SV=1	465.236	31.38	1	2	8	16	4.91919e+09	42.2667
UniProtKB:Q9UH62	Armadillo repeat-containing X-linked protein 3 OS=Homo sapiens GN=ARMCX3 PE=1 SV=1	464.85	18.47	1	4	4	6	232947925	42.4739
UniProtKB:O15226	NF-kappa-B-repressing factor OS=Homo sapiens GN=NKRF PE=1 SV=2	464.228	17.54	1	11	11	12	7.16833e+08	77.6242
UniProtKB:Q96C36	Pyrroline-5-carboxylate reductase 2 OS=Homo sapiens GN=PYCR2 PE=1 SV=1	464.119	35.63	1	7	8	13	2.00675e+09	33.6157
UniProtKB:Q15907	Ras-related protein Rab-11B OS=Homo sapiens GN=RAB11B PE=1 SV=4	463.541	48.62	1	2	10	15	7346887890	24.4735
UniProtKB:Q04724	Transducin-like enhancer protein 1 OS=Homo sapiens GN=TLE1 PE=1 SV=2	463.266	20.13	1	2	11	16	1.72386e+09	83.1484
UniProtKB:Q96CX2	BTB/POZ domain-containing protein KCTD12 OS=Homo sapiens GN=KCTD12 PE=1 SV=1	463.027	50.46	1	11	13	22	6.18457e+09	35.6787
UniProtKB:Q99575	Ribonucleases P/MRP protein subunit POP1 OS=Homo sapiens GN=POP1 PE=1 SV=2	463.001	14.45	1	10	10	14	1.71297e+09	114.636
UniProtKB:P62995	Transformer-2 protein homolog beta OS=Homo sapiens GN=TRA2B PE=1 SV=1	462.72	32.64	1	9	10	15	6.78458e+09	33.6456
UniProtKB:Q92917	G patch domain and KOW motifs-containing protein OS=Homo sapiens GN=GPKOW PE=1 SV=2	461.587	28.57	1	10	10	12	1.52973e+09	52.1966
UniProtKB:P10412	Histone H1.4 OS=Homo sapiens GN=HIST1H1E PE=1 SV=2	461.026	28.77	1	2	9	19	2.91897e+10	21.852
UniProtKB:O95602	DNA-directed RNA polymerase I subunit RPA1 OS=Homo sapiens GN=POLR1A PE=1 SV=2	460.715	11.28	1	14	15	16	1.27072e+09	194.687
UniProtKB:P42345	Serine/threonine-protein kinase mTOR OS=Homo sapiens GN=MTOR PE=1 SV=1	460.169	7.53	1	14	14	16	771448472	288.707
UniProtKB:O60343	TBC1 domain family member 4 OS=Homo sapiens GN=TBC1D4 PE=1 SV=2	459.422	13.02	1	12	13	17	1.24995e+09	146.471
UniProtKB:P24941	Cell division protein kinase 2 OS=Homo sapiens GN=CDK2 PE=1 SV=2	459.022	58.39	1	14	15	20	2.76537e+09	33.908
UniProtKB:Q9NR09	Baculoviral IAP repeat-containing protein 6 OS=Homo sapiens GN=BIRC6 PE=1 SV=2	458.753	4.88	1	15	15	16	804855540	529.919
UniProtKB:P42771	Cyclin-dependent kinase inhibitor 2A, isoforms 1/2/3 OS=Homo sapiens GN=CDKN2A PE=1 SV=2	458.565	55.77	1	4	6	14	6438968049	16.5224
UniProtKB:Q9Y277	Voltage-dependent anion-selective channel protein 3 OS=Homo sapiens GN=VDAC3 PE=1 SV=1	458.515	37.81	1	8	9	14	3.27782e+09	30.6393
UniProtKB:Q9Y3Y2	Friend of PRMT1 protein OS=Homo sapiens GN=C1orf77 PE=1 SV=2	458.372	19.76	1	5	5	15	5.17456e+09	26.3803
UniProtKB:Q9NY27	Serine/threonine-protein phosphatase 4 regulatory subunit 2 OS=Homo sapiens GN=PPP4R2 PE=1 SV=3	457.4	33.57	1	9	9	16	2.23539e+09	46.8689
UniProtKB:P11171	Protein 4.1 OS=Homo sapiens GN=EPB41 PE=1 SV=4	456.887	18.75	1	12	13	19	1.46536e+09	96.9573
UniProtKB:O60264	SWI/SNF-related matrix-associated actin-dependent regulator of chromatin subfamily A member 5 OS=Homo sapiens GN=SMARCA5 PE=1 SV=1	456.816	12.93	1	9	13	18	8.75979e+08	121.828
UniProtKB:Q12840	Kinesin heavy chain isoform 5A OS=Homo sapiens GN=KIF5A PE=1 SV=2	456.49	7.66	1	1	6	10	1.41943e+09	117.306
UniProtKB:O00264	Membrane-associated progesterone receptor component 1 OS=Homo sapiens GN=PGRMC1 PE=1 SV=3	456.141	45.64	1	4	6	9	1.29666e+09	21.6578
UniProtKB:P62277	40S ribosomal protein S13 OS=Homo sapiens GN=RPS13 PE=1 SV=2	455.981	41.06	1	9	9	25	2.03849e+10	17.2117
UniProtKB:Q15369	Transcription elongation factor B polypeptide 1 OS=Homo sapiens GN=TCEB1 PE=1 SV=1	455.749	57.14	1	6	6	12	6.02092e+09	12.465
UniProtKB:Q96FJ2	Dynein light chain 2, cytoplasmic OS=Homo sapiens GN=DYNLL2 PE=1 SV=1	455.589	59.55	1	2	5	12	4.67838e+09	10.3431
UniProtKB:O95336	6-phosphogluconolactonase OS=Homo sapiens GN=PGLS PE=1 SV=2	454.3	70.93	1	11	11	18	6300117459	27.5296
UniProtKB:Q13330	Metastasis-associated protein MTA1 OS=Homo sapiens GN=MTA1 PE=1 SV=2	453.672	25.73	1	11	14	19	2.43647e+09	80.7353
UniProtKB:Q9Y5K6	CD2-associated protein OS=Homo sapiens GN=CD2AP PE=1 SV=1	453.603	19.09	1	10	10	14	865649687	71.4073
UniProtKB:Q00169	Phosphatidylinositol transfer protein alpha isoform OS=Homo sapiens GN=PITPNA PE=1 SV=2	453.527	23.33	1	3	4	9	1098311406	31.786
UniProtKB:Q99426	Tubulin-folding cofactor B OS=Homo sapiens GN=TBCB PE=1 SV=2	453.399	37.3	1	6	6	13	2.98577e+09	27.3085
UniProtKB:Q92928	Putative Ras-related protein Rab-1C OS=Homo sapiens GN=RAB1C PE=5 SV=2	452.956	23.88	1	0	5	12	9.52875e+09	22.003
UniProtKB:O60313	Dynamin-like 120 kDa protein, mitochondrial OS=Homo sapiens GN=OPA1 PE=1 SV=3	452.72	6.25	1	4	4	8	4.12044e+08	111.561
UniProtKB:P11766	Alcohol dehydrogenase class-3 OS=Homo sapiens GN=ADH5 PE=1 SV=4	452.251	33.69	1	10	10	16	4482856749	39.6984
UniProtKB:Q8WX92	Negative elongation factor B OS=Homo sapiens GN=COBRA1 PE=1 SV=1	451.886	23.28	1	10	10	13	1.47967e+09	65.6554
UniProtKB:P38117	Electron transfer flavoprotein subunit beta OS=Homo sapiens GN=ETFB PE=1 SV=3	451.332	45.49	1	10	10	15	2139522604	27.8262
UniProtKB:Q9H6T3	RNA polymerase II-associated protein 3 OS=Homo sapiens GN=RPAP3 PE=1 SV=2	450.749	18.65	1	10	10	13	1.81173e+09	75.6719
UniProtKB:Q9BQA1	Methylosome protein 50 OS=Homo sapiens GN=WDR77 PE=1 SV=1	450.7	38.01	1	8	8	12	4.38961e+09	36.7011
UniProtKB:P22695	Cytochrome b-c1 complex subunit 2, mitochondrial OS=Homo sapiens GN=UQCRC2 PE=1 SV=3	450.668	26.27	1	7	7	11	1.94857e+09	48.4129
UniProtKB:Q7Z4Q2	HEAT repeat-containing protein 3 OS=Homo sapiens GN=HEATR3 PE=1 SV=2	450.267	17.21	1	10	10	14	9.96121e+08	74.535
UniProtKB:Q9ULV4	Coronin-1C OS=Homo sapiens GN=CORO1C PE=1 SV=1	450.202	27.85	1	11	11	15	3055995625	53.2151
UniProtKB:Q9NNW5	WD repeat-containing protein 6 OS=Homo sapiens GN=WDR6 PE=1 SV=1	448.846	21.05	1	14	14	15	1721142422	121.647
UniProtKB:Q8TCS8	Polyribonucleotide nucleotidyltransferase 1, mitochondrial OS=Homo sapiens GN=PNPT1 PE=1 SV=2	448.805	12.26	1	6	6	8	8.27264e+08	85.8966
UniProtKB:Q9UKD2	mRNA turnover protein 4 homolog OS=Homo sapiens GN=MRTO4 PE=1 SV=2	448.656	40.17	1	9	9	14	1956384800	27.5429
UniProtKB:Q6PD62	RNA polymerase-associated protein CTR9 homolog OS=Homo sapiens GN=CTR9 PE=1 SV=1	448.053	13.98	1	11	11	12	8.25053e+08	133.42
UniProtKB:P83731	60S ribosomal protein L24 OS=Homo sapiens GN=RPL24 PE=1 SV=1	447.532	31.85	1	6	6	17	14121006704	17.7679
UniProtKB:Q9Y467	Sal-like protein 2 OS=Homo sapiens GN=SALL2 PE=1 SV=4	446.586	7.25	1	4	4	7	2.33948e+08	105.244
UniProtKB:Q13242	Serine/arginine-rich splicing factor 9 OS=Homo sapiens GN=SRSF9 PE=1 SV=1	446.438	54.75	1	13	14	25	1.2475e+10	25.5264
UniProtKB:Q06787	Fragile X mental retardation 1 protein OS=Homo sapiens GN=FMR1 PE=1 SV=1	446.289	19.78	1	7	9	11	1.66407e+09	71.1309
UniProtKB:P21399	Cytoplasmic aconitate hydratase OS=Homo sapiens GN=ACO1 PE=1 SV=3	446.286	22.95	1	14	14	16	1543376910	98.3366
UniProtKB:P61513	60S ribosomal protein L37a OS=Homo sapiens GN=RPL37A PE=1 SV=2	446.282	41.3	1	2	3	12	9.75751e+09	10.2685
UniProtKB:Q9Y2J2	Band 4.1-like protein 3 OS=Homo sapiens GN=EPB41L3 PE=1 SV=2	445.763	12.33	1	9	11	15	1.60967e+09	120.603
UniProtKB:O00566	U3 small nucleolar ribonucleoprotein protein MPP10 OS=Homo sapiens GN=MPHOSPH10 PE=1 SV=2	444.907	17.47	1	8	8	14	2.92547e+09	78.8157
UniProtKB:Q16512	Serine/threonine-protein kinase N1 OS=Homo sapiens GN=PKN1 PE=1 SV=2	444.632	15.07	1	11	11	13	634653193	103.868
UniProtKB:Q9P0K7	Ankycorbin OS=Homo sapiens GN=RAI14 PE=1 SV=2	444.06	11.33	1	8	8	10	889210294	109.973
UniProtKB:Q9H2M9	Rab3 GTPase-activating protein non-catalytic subunit OS=Homo sapiens GN=RAB3GAP2 PE=1 SV=1	443.464	14.21	1	13	13	16	8.14994e+08	155.886
UniProtKB:Q96N67	Dedicator of cytokinesis protein 7 OS=Homo sapiens GN=DOCK7 PE=1 SV=4	443.31	10.33	1	14	15	17	1.06838e+09	242.407
UniProtKB:Q96K76	Ubiquitin carboxyl-terminal hydrolase 47 OS=Homo sapiens GN=USP47 PE=1 SV=3	442.982	9.45	1	9	9	11	6.03569e+08	157.212
UniProtKB:Q96F07	Cytoplasmic FMR1-interacting protein 2 OS=Homo sapiens GN=CYFIP2 PE=1 SV=2	442.972	11.19	1	3	12	16	1.8812e+09	148.302
UniProtKB:Q9H3Q1	Cdc42 effector protein 4 OS=Homo sapiens GN=CDC42EP4 PE=1 SV=1	442.94	10.96	1	3	3	6	3.2595e+08	37.9566
UniProtKB:Q9BXW9	Fanconi anemia group D2 protein OS=Homo sapiens GN=FANCD2 PE=1 SV=1	442.715	11.15	1	10	10	13	1664238094	166.356
UniProtKB:Q7Z4H3	HD domain-containing protein 2 OS=Homo sapiens GN=HDDC2 PE=1 SV=1	441.769	48.53	1	7	7	14	2.81423e+09	23.3757
UniProtKB:O95071	E3 ubiquitin-protein ligase UBR5 OS=Homo sapiens GN=UBR5 PE=1 SV=2	441.243	6.72	1	13	13	15	621037310	309.158
UniProtKB:Q14671	Pumilio homolog 1 OS=Homo sapiens GN=PUM1 PE=1 SV=3	441.073	15.35	1	10	15	16	1.14625e+09	126.395
UniProtKB:Q8N3X1	Formin-binding protein 4 OS=Homo sapiens GN=FNBP4 PE=1 SV=3	441.037	7.47	1	5	5	7	3.81584e+08	110.198
UniProtKB:Q92552	28S ribosomal protein S27, mitochondrial OS=Homo sapiens GN=MRPS27 PE=1 SV=3	440.869	20.29	1	6	6	10	1.06947e+09	47.5814
UniProtKB:P51570	Galactokinase OS=Homo sapiens GN=GALK1 PE=1 SV=1	440.854	26.53	1	8	8	11	1998311630	42.2456
UniProtKB:Q9H078	Caseinolytic peptidase B protein homolog OS=Homo sapiens GN=CLPB PE=1 SV=1	440.273	23.48	1	11	11	12	2.44419e+09	78.68
UniProtKB:Q9H2U1	Probable ATP-dependent RNA helicase DHX36 OS=Homo sapiens GN=DHX36 PE=1 SV=2	439.643	14.29	1	10	11	12	1729079960	114.688
UniProtKB:Q9BRX5	DNA replication complex GINS protein PSF3 OS=Homo sapiens GN=GINS3 PE=1 SV=1	439.526	56.02	1	9	9	11	7.27109e+08	24.5192
UniProtKB:Q9NRY5	Protein FAM114A2 OS=Homo sapiens GN=FAM114A2 PE=1 SV=4	439.244	27.92	1	8	8	9	6.40227e+08	55.4342
UniProtKB:Q96SB4	Serine/threonine-protein kinase SRPK1 OS=Homo sapiens GN=SRPK1 PE=1 SV=2	439.06	26.72	1	11	12	17	3.21186e+09	74.2784
UniProtKB:Q9NQ88	Probable fructose-2,6-bisphosphatase TIGAR OS=Homo sapiens GN=TIGAR PE=1 SV=1	439.006	31.48	1	4	4	7	5.38636e+08	30.0431
UniProtKB:Q49AR2	UPF0489 protein C5orf22 OS=Homo sapiens GN=C5orf22 PE=1 SV=2	438.447	12.67	1	3	3	7	3.5077e+08	49.9355
UniProtKB:Q6FI81	Anamorsin OS=Homo sapiens GN=CIAPIN1 PE=1 SV=2	438.371	43.27	1	12	12	19	4167399338	33.5611
UniProtKB:P30622	CAP-Gly domain-containing linker protein 1 OS=Homo sapiens GN=CLIP1 PE=1 SV=2	438.311	8.55	1	8	9	9	315899936	162.147
UniProtKB:O75937	DnaJ homolog subfamily C member 8 OS=Homo sapiens GN=DNAJC8 PE=1 SV=2	438.008	39.13	1	9	9	16	4.72874e+09	29.8234
UniProtKB:Q06265	Exosome complex exonuclease RRP45 OS=Homo sapiens GN=EXOSC9 PE=1 SV=3	437.621	23.01	1	7	7	10	1342091014	48.9181
UniProtKB:O43164	E3 ubiquitin-protein ligase Praja-2 OS=Homo sapiens GN=PJA2 PE=1 SV=4	436.716	12.01	1	4	5	7	3.95169e+08	78.1658
UniProtKB:Q15631	Translin OS=Homo sapiens GN=TSN PE=1 SV=1	436.098	46.05	1	9	9	17	7.32065e+09	26.1668
UniProtKB:P52594	Arf-GAP domain and FG repeats-containing protein 1 OS=Homo sapiens GN=AGFG1 PE=1 SV=2	436.002	18.68	1	7	7	10	6.4496e+08	58.2242
UniProtKB:P63208	S-phase kinase-associated protein 1 OS=Homo sapiens GN=SKP1 PE=1 SV=2	435.145	75.46	1	11	12	19	2.66253e+09	18.6462
UniProtKB:P51149	Ras-related protein Rab-7a OS=Homo sapiens GN=RAB7A PE=1 SV=1	435.038	56.04	1	9	9	14	3801194224	23.4748
UniProtKB:P00367	Glutamate dehydrogenase 1, mitochondrial OS=Homo sapiens GN=GLUD1 PE=1 SV=2	434.798	31.36	1	5	14	18	2.26339e+09	61.3592
UniProtKB:P54727	UV excision repair protein RAD23 homolog B OS=Homo sapiens GN=RAD23B PE=1 SV=1	434.268	36.92	1	11	13	22	7.11957e+09	43.1446
UniProtKB:O15084	Serine/threonine-protein phosphatase 6 regulatory ankyrin repeat subunit A OS=Homo sapiens GN=ANKRD28 PE=1 SV=4	433.507	12.43	1	8	8	9	6.40378e+08	116.469
UniProtKB:Q13523	Serine/threonine-protein kinase PRP4 homolog OS=Homo sapiens GN=PRPF4B PE=1 SV=2	433.22	13.51	1	12	12	14	1.94779e+09	116.902
UniProtKB:Q9BYT8	Neurolysin, mitochondrial OS=Homo sapiens GN=NLN PE=1 SV=1	433.129	19.74	1	9	9	11	1443527132	80.5997
UniProtKB:P42224	Signal transducer and activator of transcription 1-alpha/beta OS=Homo sapiens GN=STAT1 PE=1 SV=2	432.746	14.27	1	8	8	12	897155670	87.2795
UniProtKB:P09661	U2 small nuclear ribonucleoprotein A' OS=Homo sapiens GN=SNRPA1 PE=1 SV=2	432.722	53.73	1	10	10	16	4.652e+09	28.3981
UniProtKB:Q7Z2T5	TRM1-like protein OS=Homo sapiens GN=TRM1L PE=1 SV=2	432.652	15.69	1	8	8	11	1242191736	81.6952
UniProtKB:Q14141	Septin-6 OS=Homo sapiens GN=SEPT6 PE=1 SV=4	432.617	23.27	1	3	10	15	3992340403	49.6853
UniProtKB:Q9H9B4	Sideroflexin-1 OS=Homo sapiens GN=SFXN1 PE=1 SV=4	432.384	43.17	1	9	11	16	3.20712e+09	35.5963
UniProtKB:Q92620	Pre-mRNA-splicing factor ATP-dependent RNA helicase PRP16 OS=Homo sapiens GN=DHX38 PE=1 SV=2	432.262	10.51	1	9	9	11	5.59968e+08	140.415
UniProtKB:Q9BWU0	Kanadaptin OS=Homo sapiens GN=SLC4A1AP PE=1 SV=1	431.38	15.08	1	7	7	11	8.98114e+08	88.759
UniProtKB:Q9UGV2	Protein NDRG3 OS=Homo sapiens GN=NDRG3 PE=1 SV=2	431.1	31.47	1	7	7	11	1306947085	41.3825
UniProtKB:O00505	Importin subunit alpha-3 OS=Homo sapiens GN=KPNA3 PE=1 SV=2	431.02	26.3	1	6	9	15	3.7078e+09	57.7748
UniProtKB:P05783	Keratin, type I cytoskeletal 18 OS=Homo sapiens GN=KRT18 PE=1 SV=2	431.011	24.65	1	4	8	11	9.13411e+08	48.0285
UniProtKB:O75531	Barrier-to-autointegration factor OS=Homo sapiens GN=BANF1 PE=1 SV=1	430.507	62.92	1	6	6	16	6.11696e+09	10.052
UniProtKB:O95777	N-alpha-acetyltransferase 38, NatC auxiliary subunit OS=Homo sapiens GN=NAA38 PE=1 SV=3	429.203	82.29	1	5	5	9	3.58232e+09	10.3963
UniProtKB:Q9Y6D6	Brefeldin A-inhibited guanine nucleotide-exchange protein 1 OS=Homo sapiens GN=ARFGEF1 PE=1 SV=2	428.864	8.82	1	6	11	11	4.75123e+08	208.635
UniProtKB:Q6UB35	Monofunctional C1-tetrahydrofolate synthase, mitochondrial OS=Homo sapiens GN=MTHFD1L PE=1 SV=1	428.357	14.21	1	10	10	12	1.17075e+09	105.724
UniProtKB:P16402	Histone H1.3 OS=Homo sapiens GN=HIST1H1D PE=1 SV=2	428.301	26.24	1	1	8	16	2.91897e+10	22.3363
UniProtKB:Q6IN85	Serine/threonine-protein phosphatase 4 regulatory subunit 3A OS=Homo sapiens GN=SMEK1 PE=1 SV=1	427.994	15.49	1	8	11	13	1.30599e+09	95.308
UniProtKB:Q8IY67	Ribonucleoprotein PTB-binding 1 OS=Homo sapiens GN=RAVER1 PE=1 SV=1	427.757	28.71	1	8	8	13	1.99944e+09	63.8372
UniProtKB:P30837	Aldehyde dehydrogenase X, mitochondrial OS=Homo sapiens GN=ALDH1B1 PE=1 SV=3	427.619	26.11	1	8	10	12	1.28054e+09	57.1702
UniProtKB:P52888	Thimet oligopeptidase OS=Homo sapiens GN=THOP1 PE=1 SV=2	427.551	22.93	1	14	14	18	2.79155e+09	78.7895
UniProtKB:Q96DH6	RNA-binding protein Musashi homolog 2 OS=Homo sapiens GN=MSI2 PE=1 SV=1	427.14	20.43	1	3	5	10	7.65239e+08	35.1741
UniProtKB:Q9Y520	Protein BAT2-like 2 OS=Homo sapiens GN=BAT2L2 PE=1 SV=2	427.037	11.08	1	18	19	24	1.63019e+09	316.845
UniProtKB:Q12765	Secernin-1 OS=Homo sapiens GN=SCRN1 PE=1 SV=2	427.03	24.64	1	8	8	12	2.39348e+09	46.3525
UniProtKB:Q9H993	UPF0364 protein C6orf211 OS=Homo sapiens GN=C6orf211 PE=1 SV=1	426.414	24.04	1	8	8	11	2065971670	51.1399
UniProtKB:Q5W0B1	RING finger protein 219 OS=Homo sapiens GN=RNF219 PE=1 SV=1	425.82	15.7	1	8	9	11	5.33407e+08	81.0657
UniProtKB:Q8WUD4	Coiled-coil domain-containing protein 12 OS=Homo sapiens GN=CCDC12 PE=1 SV=1	425.816	48.19	1	7	7	11	1666525770	19.1692
UniProtKB:Q9NWU2	Protein C20orf11 OS=Homo sapiens GN=C20orf11 PE=1 SV=1	425.709	39.04	1	6	6	8	1672120006	26.7317
UniProtKB:O43396	Thioredoxin-like protein 1 OS=Homo sapiens GN=TXNL1 PE=1 SV=3	425.55	53.63	1	11	11	13	2.22278e+09	32.2307
UniProtKB:P51148	Ras-related protein Rab-5C OS=Homo sapiens GN=RAB5C PE=1 SV=2	425.528	37.04	1	4	6	13	3.12537e+09	23.4678
UniProtKB:P30044	Peroxiredoxin-5, mitochondrial OS=Homo sapiens GN=PRDX5 PE=1 SV=3	425.188	37.38	1	7	7	13	4.29289e+09	22.0125
UniProtKB:Q9NW64	Pre-mRNA-splicing factor RBM22 OS=Homo sapiens GN=RBM22 PE=1 SV=1	425.087	22.86	1	7	7	9	1.77855e+09	46.8654
UniProtKB:Q06323	Proteasome activator complex subunit 1 OS=Homo sapiens GN=PSME1 PE=1 SV=1	424.966	43.37	1	11	11	16	2.23453e+09	28.705
UniProtKB:Q86VM9	Zinc finger CCCH domain-containing protein 18 OS=Homo sapiens GN=ZC3H18 PE=1 SV=2	424.677	15.01	1	10	10	12	1747891636	106.316
UniProtKB:P07108	Acyl-CoA-binding protein OS=Homo sapiens GN=DBI PE=1 SV=2	423.74	60.92	1	4	4	12	4.09357e+09	10.038
UniProtKB:Q96CW1	AP-2 complex subunit mu OS=Homo sapiens GN=AP2M1 PE=1 SV=2	423.643	31.95	1	12	12	14	1.67558e+09	49.623
UniProtKB:Q14181	DNA polymerase alpha subunit B OS=Homo sapiens GN=POLA2 PE=1 SV=2	423.243	17.22	1	6	6	12	2.4686e+09	65.9063
UniProtKB:Q15370	Transcription elongation factor B polypeptide 2 OS=Homo sapiens GN=TCEB2 PE=1 SV=1	422.739	84.75	1	7	7	14	1.28419e+10	13.1246
UniProtKB:O60306	Intron-binding protein aquarius OS=Homo sapiens GN=AQR PE=1 SV=4	422.535	16.23	1	16	16	19	1.04069e+09	171.186
UniProtKB:O15020	Spectrin beta chain, brain 2 OS=Homo sapiens GN=SPTBN2 PE=1 SV=3	422.02	6.86	1	11	14	17	1.33805e+09	271.157
UniProtKB:Q6ZMR3	L-lactate dehydrogenase A-like 6A OS=Homo sapiens GN=LDHAL6A PE=2 SV=1	421.454	4.22	1	0	2	9	8.35276e+10	36.4842
UniProtKB:P63151	Serine/threonine-protein phosphatase 2A 55 kDa regulatory subunit B alpha isoform OS=Homo sapiens GN=PPP2R2A PE=1 SV=1	421.056	40.04	1	7	13	17	2.94811e+09	51.6595
UniProtKB:P30040	Endoplasmic reticulum resident protein 29 OS=Homo sapiens GN=ERP29 PE=1 SV=4	420.608	33.72	1	8	8	14	5.54903e+09	28.9752
UniProtKB:Q9UL15	BAG family molecular chaperone regulator 5 OS=Homo sapiens GN=BAG5 PE=1 SV=1	420.101	22.82	1	8	8	11	1035547013	51.1677
UniProtKB:P42167	Lamina-associated polypeptide 2, isoforms beta/gamma OS=Homo sapiens GN=TMPO PE=1 SV=2	419.805	22.91	1	0	8	13	2.31636e+09	50.6395
UniProtKB:P04818	Thymidylate synthase OS=Homo sapiens GN=TYMS PE=1 SV=3	419.789	32.27	1	7	7	9	2981335146	35.6932
UniProtKB:Q8N0Y7	Probable phosphoglycerate mutase 4 OS=Homo sapiens GN=PGAM4 PE=1 SV=1	419.52	18.11	1	0	4	18	43522605007	28.7588
UniProtKB:P19784	Casein kinase II subunit alpha' OS=Homo sapiens GN=CSNK2A2 PE=1 SV=1	418.949	24.29	1	6	6	13	1203698244	41.1871
UniProtKB:Q9H2P0	Activity-dependent neuroprotector homeobox protein OS=Homo sapiens GN=ADNP PE=1 SV=1	418.826	19.24	1	13	13	14	7.47859e+08	123.485
UniProtKB:Q7Z5K2	Wings apart-like protein homolog OS=Homo sapiens GN=WAPAL PE=1 SV=1	418.389	15.21	1	12	12	14	7.69208e+08	132.863
UniProtKB:O43252	Bifunctional 3'-phosphoadenosine 5'-phosphosulfate synthase 1 OS=Homo sapiens GN=PAPSS1 PE=1 SV=2	417.751	20.35	1	7	8	13	6.88506e+08	70.7876
UniProtKB:P04083	Annexin A1 OS=Homo sapiens GN=ANXA1 PE=1 SV=2	417.611	25.43	1	6	6	9	7.63276e+08	38.69
UniProtKB:Q9C0B1	Alpha-ketoglutarate-dependent dioxygenase FTO OS=Homo sapiens GN=FTO PE=1 SV=3	417.492	27.92	1	11	11	12	1.09026e+09	58.2449
UniProtKB:Q9Y5L0	Transportin-3 OS=Homo sapiens GN=TNPO3 PE=1 SV=3	417.237	16.03	1	11	11	14	1.37261e+09	104.136
UniProtKB:Q8IX01	Putative splicing factor, arginine/serine-rich 14 OS=Homo sapiens GN=SFRS14 PE=1 SV=2	417.025	11.09	1	10	10	13	635894491	120.132
UniProtKB:Q86XI2	Condensin-2 complex subunit G2 OS=Homo sapiens GN=NCAPG2 PE=1 SV=1	416.883	13.3	1	10	10	12	5.98779e+08	130.876
UniProtKB:Q14137	Ribosome biogenesis protein BOP1 OS=Homo sapiens GN=BOP1 PE=1 SV=2	416.351	19.3	1	13	13	16	2.26233e+09	83.5772
UniProtKB:O75934	Pre-mRNA-splicing factor SPF27 OS=Homo sapiens GN=BCAS2 PE=1 SV=1	416.044	57.78	1	12	12	17	1696332924	26.115
UniProtKB:O43237	Cytoplasmic dynein 1 light intermediate chain 2 OS=Homo sapiens GN=DYNC1LI2 PE=1 SV=1	414.957	22.97	1	7	8	12	1.71684e+09	54.0655
UniProtKB:Q9Y6X4	Protein FAM169A OS=Homo sapiens GN=FAM169A PE=1 SV=2	414.751	12.24	1	5	5	7	4.77243e+08	74.9085
UniProtKB:Q99598	Translin-associated protein X OS=Homo sapiens GN=TSNAX PE=1 SV=1	414.511	35.52	1	8	8	11	2.08169e+09	33.0917
UniProtKB:P63165	Small ubiquitin-related modifier 1 OS=Homo sapiens GN=SUMO1 PE=1 SV=1	414.212	43.56	1	5	5	16	8.70503e+09	11.5497
UniProtKB:P09012	U1 small nuclear ribonucleoprotein A OS=Homo sapiens GN=SNRPA PE=1 SV=3	414.2	34.75	1	6	7	11	4.16043e+09	31.2592
UniProtKB:Q9BU89	Deoxyhypusine hydroxylase OS=Homo sapiens GN=DOHH PE=1 SV=1	413.902	36.75	1	6	6	9	1491063073	32.8835
UniProtKB:P49959	Double-strand break repair protein MRE11A OS=Homo sapiens GN=MRE11A PE=1 SV=3	413.492	18.79	1	14	14	21	1762198252	80.5433
UniProtKB:Q96EP5	DAZ-associated protein 1 OS=Homo sapiens GN=DAZAP1 PE=1 SV=1	413.399	32.43	1	9	9	14	9396821144	43.3561
UniProtKB:P46778	60S ribosomal protein L21 OS=Homo sapiens GN=RPL21 PE=1 SV=2	412.504	32.5	1	5	5	16	26527212851	18.5531
UniProtKB:Q8TCG1	Protein CIP2A OS=Homo sapiens GN=KIAA1524 PE=1 SV=2	412.447	15.36	1	13	13	16	1.44607e+09	102.121
UniProtKB:Q9Y5L4	Mitochondrial import inner membrane translocase subunit Tim13 OS=Homo sapiens GN=TIMM13 PE=1 SV=1	412.141	77.89	1	6	6	11	7.2941e+09	10.493
UniProtKB:Q9Y4P1	Cysteine protease ATG4B OS=Homo sapiens GN=ATG4B PE=1 SV=2	412.089	25.19	1	6	6	9	1.30322e+09	44.2657
UniProtKB:Q7L1Q6	Basic leucine zipper and W2 domain-containing protein 1 OS=Homo sapiens GN=BZW1 PE=1 SV=1	412.045	29.83	1	2	13	22	3.63089e+09	48.0127
UniProtKB:Q9UG63	ATP-binding cassette sub-family F member 2 OS=Homo sapiens GN=ABCF2 PE=1 SV=2	412.027	23.6	1	15	15	21	3.19085e+09	71.2446
UniProtKB:P62847	40S ribosomal protein S24 OS=Homo sapiens GN=RPS24 PE=1 SV=1	411.991	34.59	1	4	4	13	11126676792	15.4134
UniProtKB:P11177	Pyruvate dehydrogenase E1 component subunit beta, mitochondrial OS=Homo sapiens GN=PDHB PE=1 SV=3	411.713	27.02	1	8	8	16	2.90248e+09	39.208
UniProtKB:Q9UNH7	Sorting nexin-6 OS=Homo sapiens GN=SNX6 PE=1 SV=1	411.602	28.82	1	10	11	14	1.83784e+09	46.6198
UniProtKB:Q9H4L7	SWI/SNF-related matrix-associated actin-dependent regulator of chromatin subfamily A containing DEAD/H box 1 OS=Homo sapiens GN=SMARCAD1 PE=1 SV=2	411.557	13.26	1	11	11	15	7.80781e+08	117.328
UniProtKB:O00442	RNA 3'-terminal phosphate cyclase OS=Homo sapiens GN=RTCD1 PE=1 SV=1	411.332	24.86	1	6	6	9	1.45432e+09	39.3114
UniProtKB:P26583	High mobility group protein B2 OS=Homo sapiens GN=HMGB2 PE=1 SV=2	411.178	31.1	1	8	9	15	6476986310	24.0187
UniProtKB:P14735	Insulin-degrading enzyme OS=Homo sapiens GN=IDE PE=1 SV=4	411.118	15.8	1	14	14	21	3.64123e+09	117.893
UniProtKB:Q15003	Condensin complex subunit 2 OS=Homo sapiens GN=NCAPH PE=1 SV=3	410.588	27.53	1	15	15	18	2.37693e+09	82.5113
UniProtKB:Q709C8	Vacuolar protein sorting-associated protein 13C OS=Homo sapiens GN=VPS13C PE=1 SV=1	409.869	4.56	1	11	11	12	3.43718e+08	422.124
UniProtKB:P62750	60S ribosomal protein L23a OS=Homo sapiens GN=RPL23A PE=1 SV=1	409.589	34.62	1	8	8	21	21019202852	17.6841
UniProtKB:Q92820	Gamma-glutamyl hydrolase OS=Homo sapiens GN=GGH PE=1 SV=2	409.57	27.99	1	7	7	15	2.43347e+09	35.9412
UniProtKB:Q13501	Sequestosome-1 OS=Homo sapiens GN=SQSTM1 PE=1 SV=1	408.527	26.59	1	6	6	10	2.23035e+09	47.6569
UniProtKB:Q9Y3A5	Ribosome maturation protein SBDS OS=Homo sapiens GN=SBDS PE=1 SV=4	405.941	44.8	1	10	10	13	2.06767e+09	28.7453
UniProtKB:Q6L8Q7	2',5'-phosphodiesterase 12 OS=Homo sapiens GN=PDE12 PE=1 SV=2	405.326	24.79	1	10	10	12	1.22435e+09	67.3089
UniProtKB:Q13596	Sorting nexin-1 OS=Homo sapiens GN=SNX1 PE=1 SV=3	404.78	22.8	1	8	10	12	1.70397e+09	59.0331
UniProtKB:P28331	NADH-ubiquinone oxidoreductase 75 kDa subunit, mitochondrial OS=Homo sapiens GN=NDUFS1 PE=1 SV=3	404.177	24.21	1	12	12	13	9.4376e+08	79.4165
UniProtKB:Q9NQ55	Suppressor of SWI4 1 homolog OS=Homo sapiens GN=PPAN PE=1 SV=1	403.985	19.03	1	8	8	13	1.35905e+09	53.1608
UniProtKB:O15397	Importin-8 OS=Homo sapiens GN=IPO8 PE=1 SV=2	402.835	12.73	1	9	10	12	1.35653e+09	119.861
UniProtKB:Q9UKJ3	G patch domain-containing protein 8 OS=Homo sapiens GN=GPATCH8 PE=1 SV=2	402.755	7.99	1	9	9	12	7.63629e+08	164.098
UniProtKB:P36551	Coproporphyrinogen-III oxidase, mitochondrial OS=Homo sapiens GN=CPOX PE=1 SV=3	402.54	35.68	1	13	13	16	2.03794e+09	50.12
UniProtKB:P62857	40S ribosomal protein S28 OS=Homo sapiens GN=RPS28 PE=1 SV=1	402.523	56.52	1	6	6	20	1.66189e+10	7.8362
UniProtKB:Q12756	Kinesin-like protein KIF1A OS=Homo sapiens GN=KIF1A PE=2 SV=2	402.27	9.47	1	8	11	11	733523776	190.944
UniProtKB:P25685	DnaJ homolog subfamily B member 1 OS=Homo sapiens GN=DNAJB1 PE=1 SV=4	401.934	32.06	1	11	12	21	3.00268e+09	38.0204
UniProtKB:P50552	Vasodilator-stimulated phosphoprotein OS=Homo sapiens GN=VASP PE=1 SV=3	401.624	25.26	1	7	7	13	8.20416e+08	39.8051
UniProtKB:O94788	Retinal dehydrogenase 2 OS=Homo sapiens GN=ALDH1A2 PE=1 SV=3	401.491	31.08	1	10	13	14	1.60782e+09	56.6879
UniProtKB:P48634	Large proline-rich protein BAT2 OS=Homo sapiens GN=BAT2 PE=1 SV=3	401.478	7.09	1	8	9	13	1.58898e+09	228.724
UniProtKB:P40763	Signal transducer and activator of transcription 3 OS=Homo sapiens GN=STAT3 PE=1 SV=2	401.08	18.57	1	10	10	11	1.567e+09	88.0114
UniProtKB:P55327	Tumor protein D52 OS=Homo sapiens GN=TPD52 PE=1 SV=2	400.968	56.25	1	7	7	11	1.93436e+09	24.3122
UniProtKB:Q9BYG3	MKI67 FHA domain-interacting nucleolar phosphoprotein OS=Homo sapiens GN=MKI67IP PE=1 SV=1	400.835	39.93	1	8	8	11	9.5053e+08	34.201
UniProtKB:Q9H9A5	CCR4-NOT transcription complex subunit 10 OS=Homo sapiens GN=CNOT10 PE=1 SV=1	400.181	12.5	1	7	7	8	8.45357e+08	82.2575
UniProtKB:Q99496	E3 ubiquitin-protein ligase RING2 OS=Homo sapiens GN=RNF2 PE=1 SV=1	399.877	33.93	1	6	8	13	1.90122e+09	37.6316
UniProtKB:Q14232	Translation initiation factor eIF-2B subunit alpha OS=Homo sapiens GN=EIF2B1 PE=1 SV=1	399.772	33.77	1	8	8	11	1.52393e+09	33.6908
UniProtKB:Q9NY61	Protein AATF OS=Homo sapiens GN=AATF PE=1 SV=1	399.072	28.04	1	10	10	12	1.73577e+09	63.0943
UniProtKB:P61962	DDB1- and CUL4-associated factor 7 OS=Homo sapiens GN=DCAF7 PE=1 SV=1	398.978	31.58	1	9	9	13	1.5525e+09	38.9011
UniProtKB:O60341	Lysine-specific histone demethylase 1A OS=Homo sapiens GN=KDM1A PE=1 SV=2	398.792	18.66	1	13	13	15	1.37402e+09	92.8447
UniProtKB:P19388	DNA-directed RNA polymerases I, II, and III subunit RPABC1 OS=Homo sapiens GN=POLR2E PE=1 SV=4	398.778	60.48	1	9	9	14	2.51168e+09	24.5357
UniProtKB:Q9NR50	Translation initiation factor eIF-2B subunit gamma OS=Homo sapiens GN=EIF2B3 PE=1 SV=1	398.577	25.44	1	9	9	12	1.97814e+09	50.208
UniProtKB:Q15758	Neutral amino acid transporter B(0) OS=Homo sapiens GN=SLC1A5 PE=1 SV=2	398.48	17.01	1	6	6	10	3692230645	56.5623
UniProtKB:Q7LBC6	Lysine-specific demethylase 3B OS=Homo sapiens GN=KDM3B PE=1 SV=2	397.627	11.41	1	13	13	15	1.28747e+09	191.461
UniProtKB:Q8N7H5	RNA polymerase II-associated factor 1 homolog OS=Homo sapiens GN=PAF1 PE=1 SV=2	396.709	23.16	1	9	9	11	1349419260	59.9391
UniProtKB:P46108	Adapter molecule crk OS=Homo sapiens GN=CRK PE=1 SV=2	396.385	39.14	1	9	9	14	2903829643	33.81
UniProtKB:P78406	mRNA export factor OS=Homo sapiens GN=RAE1 PE=1 SV=1	395.81	33.42	1	8	8	12	2.75627e+09	40.9419
UniProtKB:Q9BVI4	Nucleolar complex protein 4 homolog OS=Homo sapiens GN=NOC4L PE=1 SV=1	395.733	28.1	1	11	11	13	1.41672e+09	58.4307
UniProtKB:Q16222	UDP-N-acetylhexosamine pyrophosphorylase OS=Homo sapiens GN=UAP1 PE=1 SV=3	395.718	34.67	1	12	13	15	2216676929	58.7318
UniProtKB:Q8TDD1	ATP-dependent RNA helicase DDX54 OS=Homo sapiens GN=DDX54 PE=1 SV=2	395.235	17.59	1	11	11	12	1.13526e+09	98.5342
UniProtKB:P80303	Nucleobindin-2 OS=Homo sapiens GN=NUCB2 PE=1 SV=2	394.937	22.38	1	7	7	11	6.91391e+08	50.1643
UniProtKB:Q14CX7	N-alpha-acetyltransferase 25, NatB auxiliary subunit OS=Homo sapiens GN=NAA25 PE=1 SV=1	393.73	10.19	1	7	7	10	1.18313e+09	112.221
UniProtKB:Q9UNX4	WD repeat-containing protein 3 OS=Homo sapiens GN=WDR3 PE=1 SV=1	393.342	18.03	1	13	13	17	9.15591e+08	106.032
UniProtKB:Q14694	Ubiquitin carboxyl-terminal hydrolase 10 OS=Homo sapiens GN=USP10 PE=1 SV=2	392.709	29.2	1	17	17	22	2.52721e+09	87.0798
UniProtKB:Q13823	Nucleolar GTP-binding protein 2 OS=Homo sapiens GN=GNL2 PE=1 SV=1	392.449	17.78	1	11	11	14	8.10705e+08	83.6034
UniProtKB:Q9BRP8	Partner of Y14 and mago OS=Homo sapiens GN=WIBG PE=1 SV=1	392.41	47.55	1	6	6	11	1.5543e+09	22.642
[truncated: 4,510 more rows]

## Sheet: 2D shortTot Uni Phospho Pept
Mascot Score ≥ 20	Search Engine Rank=1
[truncated: 346 more rows]

[truncated: 5 more sheets: 2D short Uni NTerm Acetyl Pept, 2D long Total Unique Peptides, 2D long Total Unique Proteins, 2D long Tot Uni Phospho Pept, 2D long Uni NTerm Acetyl Pept]
