# Supplementary material for: Characterization and usage of the EASY-spray technology as part of an online 2D SCX-RP ultra-high pressure system
Source: Royal Society of Chemistry journal article supplement (doi:10.1039/c4an01568a), 2014-01-01
Supplement: c4an01568a4.xlsx [file c4an01568a4.xlsx]

## Sheet: Sheet1
Experiment	Dimensions	Number of Salt Steps	Injected Material (μg)	Total analysis time	Total Number of Unique Proteins	Total Number of Unique Peptides
1D 22 min	RP	NA	1	45	1394	5143
1D 37 min	RP	NA	1	60	2095	8314
1D 67 min	RP	NA	1	90	2633	11762
1D 157 min	RP	NA	1	180	3088	14575
1D 214 min	RP	NA	4	240	4446	19039
1D 334 min	RP	NA	4	360	4220	21041
1D 454 min	RP	NA	4	480	4395	22060
1D 574 min	RP	NA	4	600	4626	24190
1D combined triplicate 180 min	RP	NA	12	540	4369	24367
1D combined triplicate 600 min	RP	NA	12	1800	5646	37805
2D short	SCX/RP	6	10	420	5958	36943
2D long	SCX/RP	6	10	1260	7565	56600
